# Supplementary material for: Crystallization Pathways of FABr-PbBr2-DMF and FABr-PbBr2-DMSO Systems: The Comprehensive Picture of Formamidinium-Based Low-Dimensional Perovskite-Related Phases and Intermediate Solvates
Source: Int J Mol Sci. 2022 Dec 5;23(23):15344. doi: 10.3390/ijms232315344 (PMC9739158; doi:10.3390/ijms232315344)
Supplement: Supplementary file 1 [file ijms-23-15344-s001.zip]

Archive with 4 entries (4 files):
- FA2PbBr4-m2.cif
- FA3PbBr5.cif
- FAPbBr3_DMSO.cif
- Figures S1-S17.pdf
