# Supplementary material for: Crystallization Pathways of FABr-PbBr2-DMF and FABr-PbBr2-DMSO Systems: The Comprehensive Picture of Formamidinium-Based Low-Dimensional Perovskite-Related Phases and Intermediate Solvates
Source: Int J Mol Sci. 2022 Dec 5;23(23):15344. doi: 10.3390/ijms232315344 (PMC9739158; doi:10.3390/ijms232315344)
Supplement: Supplementary file 1 [file ijms-23-15344-s001.zip › FA2PbBr4-m2.cif]

 
data_FA2PbBr4m2 
  
_audit_creation_method            'SHELXL-2014/7' 
_shelx_SHELXL_version_number      '2014/7' 
_chemical_name_systematic         ? 
_chemical_name_common             ? 
_chemical_melting_point           ? 
_chemical_formula_moiety          
 'Br12 Pb3, 6(C H5 N2)' 
_chemical_formula_sum 
 'C6 H30 Br12 N12 Pb3' 
_chemical_formula_weight          1850.82 
  
loop_ 
 _atom_type_symbol 
 _atom_type_description 
 _atom_type_scat_dispersion_real 
 _atom_type_scat_dispersion_imag 
 _atom_type_scat_source 
 'C'  'C'   0.0033   0.0016 
 'International Tables Vol C Tables 4.2.6.8 and 6.1.1.4' 
 'H'  'H'   0.0000   0.0000 
 'International Tables Vol C Tables 4.2.6.8 and 6.1.1.4' 
 'N'  'N'   0.0061   0.0033 
 'International Tables Vol C Tables 4.2.6.8 and 6.1.1.4' 
 'Br'  'Br'  -0.2901   2.4595 
 'International Tables Vol C Tables 4.2.6.8 and 6.1.1.4' 
 'Pb'  'Pb'  -3.3944  10.1111 
 'International Tables Vol C Tables 4.2.6.8 and 6.1.1.4' 
  
_space_group_crystal_system       monoclinic 
_space_group_IT_number            14 
_space_group_name_H-M_alt         'P 21/n' 
_space_group_name_Hall            '-P 2yn' 
  
_shelx_space_group_comment 
; 
The symmetry employed for this shelxl refinement is uniquely defined 
by the following loop, which should always be used as a source of 
symmetry information in preference to the above space-group names. 
They are only intended as comments. 
; 
  
loop_ 
 _space_group_symop_operation_xyz 
 'x, y, z' 
 '-x+1/2, y+1/2, -z+1/2' 
 '-x, -y, -z' 
 'x-1/2, -y-1/2, z-1/2' 
  
_cell_length_a                    13.4125(3) 
_cell_length_b                    11.8703(3) 
_cell_length_c                    23.7252(6) 
_cell_angle_alpha                 90 
_cell_angle_beta                  102.0290(10) 
_cell_angle_gamma                 90 
_cell_volume                      3694.36(16) 
_cell_formula_units_Z             4 
_cell_measurement_temperature     100(2) 
_cell_measurement_reflns_used     9323 
_cell_measurement_theta_min       2.31 
_cell_measurement_theta_max       32.59 
  
_exptl_crystal_description        prism 
_exptl_crystal_colour             colourless 
_exptl_crystal_density_meas       ? 
_exptl_crystal_density_method     ? 
_exptl_crystal_density_diffrn     3.328 
_exptl_crystal_F_000              3264 
_exptl_transmission_factor_min    ? 
_exptl_transmission_factor_max    ? 
_exptl_crystal_size_max           0.20 
_exptl_crystal_size_mid           0.15 
_exptl_crystal_size_min           0.15 
_exptl_absorpt_coefficient_mu     26.638 
_shelx_estimated_absorpt_T_min    0.076 
_shelx_estimated_absorpt_T_max    0.109 
_exptl_absorpt_correction_type    'multi-scan' 
_exptl_absorpt_correction_T_min   0.015     
_exptl_absorpt_correction_T_max   0.054
_exptl_absorpt_process_details 
; 
 SADABS 2016/2: Krause, L., Herbst-Irmer, R., Sheldrick G.M. & Stalke D., 
 J. Appl. Cryst. 48 (2015) 3-10. 
; 
_exptl_absorpt_special_details    ? 
_diffrn_ambient_temperature       100(2) 
_diffrn_radiation_wavelength      0.71073 
_diffrn_radiation_type            MoK\a 
_diffrn_source                    'normal-focus sealed tube'      
_diffrn_measurement_device_type   'Bruker D8 QUEST PHOTON-III CCD' 
_diffrn_measurement_method        '\f and \w scans' 
_diffrn_detector_area_resol_mean  ? 
_diffrn_reflns_number             96548 
_diffrn_reflns_av_unetI/netI      0.0292 
_diffrn_reflns_av_R_equivalents   0.0578 
_diffrn_reflns_limit_h_min        -18 
_diffrn_reflns_limit_h_max        18 
_diffrn_reflns_limit_k_min        -16 
_diffrn_reflns_limit_k_max        16 
_diffrn_reflns_limit_l_min        -32 
_diffrn_reflns_limit_l_max        32 
_diffrn_reflns_theta_min          1.927 
_diffrn_reflns_theta_max          29.000 
_diffrn_reflns_theta_full         25.242 
_diffrn_measured_fraction_theta_max   0.992 
_diffrn_measured_fraction_theta_full  0.988 
_diffrn_reflns_Laue_measured_fraction_max    0.992 
_diffrn_reflns_Laue_measured_fraction_full   0.988 
_diffrn_reflns_point_group_measured_fraction_max   0.992 
_diffrn_reflns_point_group_measured_fraction_full  0.988 
_reflns_number_total              9741 
_reflns_number_gt                 9222 
_reflns_threshold_expression      'I > 2\s(I)' 
_reflns_Friedel_coverage          0.000 
_reflns_Friedel_fraction_max      . 
_reflns_Friedel_fraction_full     . 
  
_reflns_special_details 
; 
 Reflections were merged by SHELXL according to the crystal 
 class for the calculation of statistics and refinement. 
  
 _reflns_Friedel_fraction is defined as the number of unique 
 Friedel pairs measured divided by the number that would be 
 possible theoretically, ignoring centric projections and 
 systematic absences. 
; 
  
_computing_data_collection        'APEX3 (Bruker, 2018)'     
_computing_cell_refinement        'SAINT (Bruker, 2013)'     
_computing_data_reduction         'SAINT (Bruker, 2013)'     
_computing_structure_solution     'SHELXT (Sheldrick, 2015)' 
_computing_structure_refinement   'SHELXL (Sheldrick, 2015)'  
_computing_molecular_graphics     'SHELXTL (Sheldrick, 2015)'
_computing_publication_material   'SHELXTL (Sheldrick, 2015)'
_refine_special_details           ? 
_refine_ls_structure_factor_coef  Fsqd 
_refine_ls_matrix_type            full 
_refine_ls_weighting_scheme       calc 
_refine_ls_weighting_details 
'w=1/[\s^2^(Fo^2^)+(0.0204P)^2^+25P] where P=(Fo^2^+2Fc^2^)/3' 
_atom_sites_solution_primary      difmap
_atom_sites_solution_secondary    difmap
_atom_sites_solution_hydrogens    geom 
_refine_ls_hydrogen_treatment     constr 
_refine_ls_extinction_method      'SHELXL-2014/7 (Sheldrick, 2014)' 
_refine_ls_extinction_coef        0.000407(14) 
_refine_ls_extinction_expression 
 'Fc^*^=kFc[1+0.001xFc^2^\l^3^/sin(2\q)]^-1/4^' 
_refine_ls_number_reflns          9741 
_refine_ls_number_parameters      299 
_refine_ls_number_restraints      0 
_refine_ls_R_factor_all           0.0263 
_refine_ls_R_factor_gt            0.0244 
_refine_ls_wR_factor_ref          0.0591 
_refine_ls_wR_factor_gt           0.0582 
_refine_ls_goodness_of_fit_ref    1.014 
_refine_ls_restrained_S_all       1.014 
_refine_ls_shift/su_max           0.001 
_refine_ls_shift/su_mean          0.000 
  
loop_ 
 _atom_site_label 
 _atom_site_type_symbol 
 _atom_site_fract_x 
 _atom_site_fract_y 
 _atom_site_fract_z 
 _atom_site_U_iso_or_equiv 
 _atom_site_adp_type 
 _atom_site_occupancy 
 _atom_site_site_symmetry_order 
 _atom_site_calc_flag 
 _atom_site_refinement_flags_posn 
 _atom_site_refinement_flags_adp 
 _atom_site_refinement_flags_occupancy 
 _atom_site_disorder_assembly 
 _atom_site_disorder_group 
Pb1 Pb 0.30554(2) 0.78208(2) 0.62488(2) 0.01094(4) Uani 1 1 d . . . . . 
Pb2 Pb 0.75125(2) 0.76415(2) 0.74841(2) 0.01105(4) Uani 1 1 d . . . . . 
Pb3 Pb 0.29493(2) 0.28526(2) 0.62709(2) 0.01122(4) Uani 1 1 d . . . . . 
Br1 Br 0.53878(3) 0.75429(4) 0.67246(2) 0.01656(8) Uani 1 1 d . . . . . 
Br2 Br 0.26350(3) 0.53286(3) 0.62716(2) 0.01879(9) Uani 1 1 d . . . . . 
Br3 Br 0.08869(3) 0.81659(4) 0.58575(2) 0.01805(9) Uani 1 1 d . . . . . 
Br4 Br 0.32632(3) 1.03153(3) 0.61904(2) 0.01684(8) Uani 1 1 d . . . . . 
Br5 Br 0.34359(4) 0.75662(4) 0.50893(2) 0.01908(9) Uani 1 1 d . . . . . 
Br6 Br 0.28325(4) 0.78980(4) 0.75185(2) 0.01920(9) Uani 1 1 d . . . . . 
Br7 Br 0.96541(3) 0.78057(4) 0.81433(2) 0.01813(9) Uani 1 1 d . . . . . 
Br8 Br 0.82770(3) 0.73728(4) 0.63826(2) 0.01989(9) Uani 1 1 d . . . . . 
Br9 Br 0.73811(4) 1.01421(3) 0.73492(2) 0.01817(9) Uani 1 1 d . . . . . 
Br10 Br 0.65598(4) 0.77987(4) 0.84933(2) 0.02397(10) Uani 1 1 d . . . . . 
Br11 Br 0.34932(3) 0.31689(4) 0.51850(2) 0.01843(9) Uani 1 1 d . . . . . 
Br12 Br 0.08786(3) 0.25404(4) 0.56973(2) 0.02132(9) Uani 1 1 d . . . . . 
N1 N 0.1226(3) 1.0174(4) 0.48619(19) 0.0254(9) Uani 1 1 d . . . . . 
H1A H 0.1240 1.0911 0.4825 0.030 Uiso 1 1 calc R U . . . 
H1B H 0.1139 0.9872 0.5187 0.030 Uiso 1 1 calc R U . . . 
N2 N 0.1465(3) 0.9878(4) 0.39431(18) 0.0230(8) Uani 1 1 d . . . . . 
H2A H 0.1488 1.0605 0.3874 0.028 Uiso 1 1 calc R U . . . 
H2B H 0.1532 0.9388 0.3675 0.028 Uiso 1 1 calc R U . . . 
C1 C 0.1334(3) 0.9531(4) 0.4437(2) 0.0181(8) Uani 1 1 d . . . . . 
H1 H 0.1314 0.8740 0.4494 0.022 Uiso 1 1 calc R U . . . 
N3 N 0.8236(3) 0.9980(4) 0.89320(18) 0.0248(8) Uani 1 1 d . . . . . 
H3A H 0.8092 1.0695 0.8856 0.030 Uiso 1 1 calc R U . . . 
H3B H 0.7751 0.9470 0.8858 0.030 Uiso 1 1 calc R U . . . 
N4 N 0.9933(3) 1.0358(3) 0.92785(19) 0.0224(8) Uani 1 1 d . . . . . 
H4A H 0.9849 1.1085 0.9215 0.027 Uiso 1 1 calc R U . . . 
H4B H 1.0543 1.0089 0.9428 0.027 Uiso 1 1 calc R U . . . 
C2 C 0.9160(4) 0.9681(4) 0.91520(19) 0.0182(9) Uani 1 1 d . . . . . 
H2 H 0.9283 0.8902 0.9227 0.022 Uiso 1 1 calc R U . . . 
N5 N 0.4884(3) 0.5259(4) 0.74952(19) 0.0259(9) Uani 1 1 d . . . . . 
H5A H 0.4888 0.5985 0.7421 0.031 Uiso 1 1 calc R U . . . 
H5B H 0.5191 0.4784 0.7302 0.031 Uiso 1 1 calc R U . . . 
N6 N 0.3958(4) 0.5504(4) 0.8196(2) 0.0337(11) Uani 1 1 d . . . . . 
H6A H 0.3927 0.6239 0.8147 0.040 Uiso 1 1 calc R U . . . 
H6B H 0.3666 0.5186 0.8455 0.040 Uiso 1 1 calc R U . . . 
C3 C 0.4430(4) 0.4892(4) 0.7887(2) 0.0204(9) Uani 1 1 d . . . . . 
H3 H 0.4445 0.4102 0.7953 0.025 Uiso 1 1 calc R U . . . 
N7 N 0.4124(4) 0.9298(5) 0.40792(19) 0.0324(10) Uani 1 1 d . . . . . 
H7A H 0.4039 0.8694 0.4279 0.039 Uiso 1 1 calc R U . . . 
H7B H 0.4285 0.9228 0.3740 0.039 Uiso 1 1 calc R U . . . 
N8 N 0.3773(3) 1.0472(4) 0.47836(19) 0.0243(8) Uani 1 1 d . . . . . 
H8A H 0.3679 0.9900 0.5003 0.029 Uiso 1 1 calc R U . . . 
H8B H 0.3707 1.1166 0.4900 0.029 Uiso 1 1 calc R U . . . 
C4 C 0.4012(4) 1.0288(5) 0.4284(2) 0.0275(11) Uani 1 1 d . . . . . 
H4 H 0.4109 1.0923 0.4057 0.033 Uiso 1 1 calc R U . . . 
N9 N -0.1474(5) 0.4504(7) 0.5268(2) 0.066(2) Uani 1 1 d . . . . . 
H9A H -0.1240 0.3824 0.5365 0.080 Uiso 1 1 calc R U . . . 
H9B H -0.2093 0.4592 0.5059 0.080 Uiso 1 1 calc R U . . . 
N10 N -0.0036(4) 0.5378(5) 0.5722(2) 0.0363(12) Uani 1 1 d . . . . . 
H10A H 0.0283 0.4750 0.5847 0.044 Uiso 1 1 calc R U . . . 
H10B H 0.0270 0.6031 0.5805 0.044 Uiso 1 1 calc R U . . . 
C5 C -0.0929(4) 0.5343(5) 0.5425(2) 0.0315(12) Uani 1 1 d . . . . . 
H5 H -0.1229 0.6052 0.5305 0.038 Uiso 1 1 calc R U . . . 
N11 N 0.0638(3) 0.6451(3) 0.70543(19) 0.0242(8) Uani 1 1 d . . . . . 
H11A H 0.0017 0.6718 0.6938 0.029 Uiso 1 1 calc R U . . . 
H11B H 0.1169 0.6874 0.7035 0.029 Uiso 1 1 calc R U . . . 
N12 N 0.0047(4) 0.4754(4) 0.7299(2) 0.0335(11) Uani 1 1 d . . . . . 
H12A H -0.0593 0.4967 0.7190 0.040 Uiso 1 1 calc R U . . . 
H12B H 0.0191 0.4073 0.7439 0.040 Uiso 1 1 calc R U . . . 
C6 C 0.0771(4) 0.5438(4) 0.7253(2) 0.0204(9) Uani 1 1 d . . . . . 
H6 H 0.1452 0.5178 0.7375 0.024 Uiso 1 1 calc R U . . . 
  
loop_ 
 _atom_site_aniso_label 
 _atom_site_aniso_U_11 
 _atom_site_aniso_U_22 
 _atom_site_aniso_U_33 
 _atom_site_aniso_U_23 
 _atom_site_aniso_U_13 
 _atom_site_aniso_U_12 
Pb1 0.00854(7) 0.01325(7) 0.01224(7) 0.00012(5) 0.00496(5) 0.00017(5) 
Pb2 0.00762(7) 0.01255(7) 0.01360(7) -0.00023(5) 0.00366(5) 0.00051(5) 
Pb3 0.00797(7) 0.01368(7) 0.01304(7) 0.00040(5) 0.00457(5) -0.00020(5) 
Br1 0.00962(18) 0.02103(19) 0.01861(19) 0.00044(15) 0.00195(15) -0.00048(14) 
Br2 0.0180(2) 0.01316(18) 0.0266(2) -0.00081(15) 0.00793(17) -0.00021(14) 
Br3 0.00940(18) 0.0239(2) 0.0208(2) 0.00286(16) 0.00309(15) 0.00004(15) 
Br4 0.0166(2) 0.01338(18) 0.0220(2) 0.00052(14) 0.00732(16) -0.00104(14) 
Br5 0.0217(2) 0.0229(2) 0.01479(19) 0.00016(15) 0.00885(16) 0.00396(16) 
Br6 0.0198(2) 0.0247(2) 0.01524(19) -0.00181(15) 0.00876(16) -0.00514(16) 
Br7 0.01064(19) 0.0250(2) 0.0183(2) -0.00229(15) 0.00202(15) 0.00237(15) 
Br8 0.0155(2) 0.0260(2) 0.0206(2) -0.00178(16) 0.00941(16) 0.00041(16) 
Br9 0.0198(2) 0.01302(18) 0.0222(2) 0.00008(15) 0.00569(16) -0.00045(15) 
Br10 0.0291(3) 0.0267(2) 0.0199(2) 0.00440(17) 0.01370(19) 0.00519(18) 
Br11 0.0222(2) 0.0209(2) 0.01495(18) -0.00076(15) 0.01011(16) -0.00334(16) 
Br12 0.01067(19) 0.0263(2) 0.0261(2) -0.00135(17) 0.00158(16) -0.00234(16) 
N1 0.026(2) 0.030(2) 0.021(2) 0.0017(16) 0.0075(17) 0.0103(17) 
N2 0.0177(19) 0.030(2) 0.0212(19) -0.0008(16) 0.0041(15) 0.0005(16) 
C1 0.0109(19) 0.021(2) 0.022(2) 0.0032(16) 0.0010(16) 0.0023(15) 
N3 0.022(2) 0.029(2) 0.024(2) -0.0051(16) 0.0045(16) 0.0036(17) 
N4 0.021(2) 0.0203(19) 0.028(2) -0.0002(15) 0.0113(17) 0.0025(15) 
C2 0.025(2) 0.0163(19) 0.017(2) -0.0018(15) 0.0125(18) -0.0020(16) 
N5 0.024(2) 0.032(2) 0.026(2) 0.0058(17) 0.0135(17) 0.0036(17) 
N6 0.036(3) 0.032(2) 0.041(3) 0.004(2) 0.025(2) 0.006(2) 
C3 0.017(2) 0.021(2) 0.025(2) -0.0021(17) 0.0068(18) -0.0013(16) 
N7 0.029(2) 0.051(3) 0.021(2) -0.011(2) 0.0120(18) -0.005(2) 
N8 0.023(2) 0.0204(19) 0.030(2) -0.0026(16) 0.0064(17) 0.0020(15) 
C4 0.022(2) 0.036(3) 0.025(2) 0.013(2) 0.006(2) -0.001(2) 
N9 0.047(4) 0.129(7) 0.022(2) 0.001(3) 0.006(2) -0.057(4) 
N10 0.022(2) 0.048(3) 0.041(3) -0.021(2) 0.010(2) -0.005(2) 
C5 0.027(3) 0.040(3) 0.032(3) 0.010(2) 0.017(2) 0.008(2) 
N11 0.0175(19) 0.0233(19) 0.035(2) 0.0019(17) 0.0130(17) -0.0010(15) 
N12 0.023(2) 0.028(2) 0.047(3) 0.012(2) 0.002(2) -0.0064(18) 
C6 0.017(2) 0.026(2) 0.019(2) -0.0004(17) 0.0055(17) 0.0013(17) 
  
_geom_special_details 
; 
 All esds (except the esd in the dihedral angle between two l.s. planes) 
 are estimated using the full covariance matrix.  The cell esds are taken 
 into account individually in the estimation of esds in distances, angles 
 and torsion angles; correlations between esds in cell parameters are only 
 used when they are defined by crystal symmetry.  An approximate (isotropic) 
 treatment of cell esds is used for estimating esds involving l.s. planes. 
; 
  
loop_ 
 _geom_bond_atom_site_label_1 
 _geom_bond_atom_site_label_2 
 _geom_bond_distance 
 _geom_bond_site_symmetry_2 
 _geom_bond_publ_flag 
Pb1 Br3 2.8921(4) . ? 
Pb1 Br5 2.9163(4) . ? 
Pb1 Br4 2.9801(4) . ? 
Pb1 Br2 3.0143(4) . ? 
Pb1 Br6 3.0900(4) . ? 
Pb1 Br1 3.1141(4) . ? 
Pb2 Br10 2.9455(5) . ? 
Pb2 Br7 2.9770(5) . ? 
Pb2 Br9 2.9868(4) . ? 
Pb2 Br9 2.9927(4) 2_646 ? 
Pb2 Br8 3.0166(5) . ? 
Pb2 Br1 3.0399(4) . ? 
Pb3 Br11 2.8449(4) . ? 
Pb3 Br12 2.8509(5) . ? 
Pb3 Br2 2.9692(4) . ? 
Pb3 Br4 3.0525(4) 1_545 ? 
Pb3 Br7 3.2257(5) 2_646 ? 
Br4 Pb3 3.0526(4) 1_565 ? 
Br7 Pb3 3.2257(5) 2_656 ? 
Br9 Pb2 2.9926(4) 2_656 ? 
N1 C1 1.297(6) . ? 
N1 H1A 0.8800 . ? 
N1 H1B 0.8800 . ? 
N2 C1 1.287(6) . ? 
N2 H2A 0.8800 . ? 
N2 H2B 0.8800 . ? 
C1 H1 0.9500 . ? 
N3 C2 1.289(7) . ? 
N3 H3A 0.8800 . ? 
N3 H3B 0.8800 . ? 
N4 C2 1.297(6) . ? 
N4 H4A 0.8800 . ? 
N4 H4B 0.8800 . ? 
C2 H2 0.9500 . ? 
N5 C3 1.289(6) . ? 
N5 H5A 0.8800 . ? 
N5 H5B 0.8800 . ? 
N6 C3 1.288(6) . ? 
N6 H6A 0.8800 . ? 
N6 H6B 0.8800 . ? 
C3 H3 0.9500 . ? 
N7 C4 1.292(8) . ? 
N7 H7A 0.8800 . ? 
N7 H7B 0.8800 . ? 
N8 C4 1.309(7) . ? 
N8 H8A 0.8800 . ? 
N8 H8B 0.8800 . ? 
C4 H4 0.9500 . ? 
N9 C5 1.246(9) . ? 
N9 H9A 0.8800 . ? 
N9 H9B 0.8800 . ? 
N10 C5 1.258(8) . ? 
N10 H10A 0.8800 . ? 
N10 H10B 0.8800 . ? 
C5 H5 0.9500 . ? 
N11 C6 1.291(6) . ? 
N11 H11A 0.8800 . ? 
N11 H11B 0.8800 . ? 
N12 C6 1.288(6) . ? 
N12 H12A 0.8800 . ? 
N12 H12B 0.8800 . ? 
C6 H6 0.9500 . ? 
  
loop_ 
 _geom_angle_atom_site_label_1 
 _geom_angle_atom_site_label_2 
 _geom_angle_atom_site_label_3 
 _geom_angle 
 _geom_angle_site_symmetry_1 
 _geom_angle_site_symmetry_3 
 _geom_angle_publ_flag 
Br3 Pb1 Br5 94.238(14) . . ? 
Br3 Pb1 Br4 86.668(13) . . ? 
Br5 Pb1 Br4 91.297(13) . . ? 
Br3 Pb1 Br2 88.015(13) . . ? 
Br5 Pb1 Br2 89.163(13) . . ? 
Br4 Pb1 Br2 174.683(13) . . ? 
Br3 Pb1 Br6 90.773(13) . . ? 
Br5 Pb1 Br6 173.838(14) . . ? 
Br4 Pb1 Br6 92.573(12) . . ? 
Br2 Pb1 Br6 87.427(13) . . ? 
Br3 Pb1 Br1 176.848(13) . . ? 
Br5 Pb1 Br1 88.335(13) . . ? 
Br4 Pb1 Br1 91.460(13) . . ? 
Br2 Pb1 Br1 93.848(13) . . ? 
Br6 Pb1 Br1 86.774(13) . . ? 
Br10 Pb2 Br7 95.935(14) . . ? 
Br10 Pb2 Br9 89.901(13) . . ? 
Br7 Pb2 Br9 91.156(13) . . ? 
Br10 Pb2 Br9 88.404(13) . 2_646 ? 
Br7 Pb2 Br9 88.926(13) . 2_646 ? 
Br9 Pb2 Br9 178.302(6) . 2_646 ? 
Br10 Pb2 Br8 173.883(15) . . ? 
Br7 Pb2 Br8 89.833(13) . . ? 
Br9 Pb2 Br8 92.025(13) . . ? 
Br9 Pb2 Br8 89.671(13) 2_646 . ? 
Br10 Pb2 Br1 88.415(14) . . ? 
Br7 Pb2 Br1 175.275(13) . . ? 
Br9 Pb2 Br1 86.998(13) . . ? 
Br9 Pb2 Br1 93.048(13) 2_646 . ? 
Br8 Pb2 Br1 85.889(13) . . ? 
Br11 Pb3 Br12 89.601(14) . . ? 
Br11 Pb3 Br2 86.165(13) . . ? 
Br12 Pb3 Br2 90.263(14) . . ? 
Br11 Pb3 Br4 90.505(13) . 1_545 ? 
Br12 Pb3 Br4 88.582(13) . 1_545 ? 
Br2 Pb3 Br4 176.484(13) . 1_545 ? 
Br11 Pb3 Br7 88.393(13) . 2_646 ? 
Br12 Pb3 Br7 170.977(14) . 2_646 ? 
Br2 Pb3 Br7 98.377(13) . 2_646 ? 
Br4 Pb3 Br7 82.640(12) 1_545 2_646 ? 
Pb2 Br1 Pb1 163.256(16) . . ? 
Pb3 Br2 Pb1 160.799(17) . . ? 
Pb1 Br4 Pb3 164.149(17) . 1_565 ? 
Pb2 Br7 Pb3 173.343(16) . 2_656 ? 
Pb2 Br9 Pb2 166.163(18) . 2_656 ? 
C1 N1 H1A 120.0 . . ? 
C1 N1 H1B 120.0 . . ? 
H1A N1 H1B 120.0 . . ? 
C1 N2 H2A 120.0 . . ? 
C1 N2 H2B 120.0 . . ? 
H2A N2 H2B 120.0 . . ? 
N2 C1 N1 125.3(5) . . ? 
N2 C1 H1 117.3 . . ? 
N1 C1 H1 117.3 . . ? 
C2 N3 H3A 120.0 . . ? 
C2 N3 H3B 120.0 . . ? 
H3A N3 H3B 120.0 . . ? 
C2 N4 H4A 120.0 . . ? 
C2 N4 H4B 120.0 . . ? 
H4A N4 H4B 120.0 . . ? 
N3 C2 N4 125.3(5) . . ? 
N3 C2 H2 117.4 . . ? 
N4 C2 H2 117.4 . . ? 
C3 N5 H5A 120.0 . . ? 
C3 N5 H5B 120.0 . . ? 
H5A N5 H5B 120.0 . . ? 
C3 N6 H6A 120.0 . . ? 
C3 N6 H6B 120.0 . . ? 
H6A N6 H6B 120.0 . . ? 
N6 C3 N5 125.6(5) . . ? 
N6 C3 H3 117.2 . . ? 
N5 C3 H3 117.2 . . ? 
C4 N7 H7A 120.0 . . ? 
C4 N7 H7B 120.0 . . ? 
H7A N7 H7B 120.0 . . ? 
C4 N8 H8A 120.0 . . ? 
C4 N8 H8B 120.0 . . ? 
H8A N8 H8B 120.0 . . ? 
N7 C4 N8 124.1(5) . . ? 
N7 C4 H4 117.9 . . ? 
N8 C4 H4 117.9 . . ? 
C5 N9 H9A 120.0 . . ? 
C5 N9 H9B 120.0 . . ? 
H9A N9 H9B 120.0 . . ? 
C5 N10 H10A 120.0 . . ? 
C5 N10 H10B 120.0 . . ? 
H10A N10 H10B 120.0 . . ? 
N9 C5 N10 128.7(7) . . ? 
N9 C5 H5 115.6 . . ? 
N10 C5 H5 115.6 . . ? 
C6 N11 H11A 120.0 . . ? 
C6 N11 H11B 120.0 . . ? 
H11A N11 H11B 120.0 . . ? 
C6 N12 H12A 120.0 . . ? 
C6 N12 H12B 120.0 . . ? 
H12A N12 H12B 120.0 . . ? 
N12 C6 N11 124.7(5) . . ? 
N12 C6 H6 117.6 . . ? 
N11 C6 H6 117.6 . . ? 
  
  
loop_ 
 _geom_hbond_atom_site_label_D 
 _geom_hbond_atom_site_label_H 
 _geom_hbond_atom_site_label_A 
 _geom_hbond_distance_DH 
 _geom_hbond_distance_HA 
 _geom_hbond_distance_DA 
 _geom_hbond_angle_DHA 
 _geom_hbond_site_symmetry_A 
N1  H1B  Br3  0.88 2.64 3.452(5) 153.8 . 
N2  H2A  Br8  0.88 2.51 3.388(4) 173.2 3_676 
N2  H2B  Br10 0.88 2.63 3.363(4) 141.0 4_575 
N3  H3A  Br8  0.88 2.69 3.480(4) 150.3 2_656 
N3  H3B  Br10 0.88 2.58 3.446(5) 167.6 . 
N4  H4A  Br1  0.88 2.79 3.486(4) 137.4 2_656 
N4  H4B  Br11 0.88 2.69 3.421(4) 141.8 2_656 
N5  H5A  Br1  0.88 2.66 3.415(4) 145.0 . 
N5  H5B  Br7  0.88 2.60 3.399(5) 151.1 2_646 
N6  H6A  Br6  0.88 2.71 3.454(5) 142.9 . 
N6  H6B  Br3  0.88 2.89 3.549(5) 132.8 2_546 
N6  H6B  Br4  0.88 2.89 3.585(5) 137.5 2_546 
N7  H7A  Br5  0.88 2.61 3.427(5) 155.7 . 
N7  H7B  Br7  0.88 2.89 3.511(5) 128.8 4_575 
N8  H8A  Br5  0.88 2.80 3.572(4) 147.0 . 
N8  H8B  Br11 0.88 2.50 3.383(4) 177.4 1_565 
C4  H4   Br1  0.95 2.78 3.715(5) 167.8 3_676 
N10 H10A Br12 0.88 2.79 3.590(5) 152.6 . 
N10 H10B Br3  0.88 2.66 3.524(5) 167.3 . 
N11 H11A Br8  0.88 2.55 3.415(4) 167.5 1_455 
N11 H11B Br6  0.88 2.59 3.387(4) 151.2 . 
N12 H12A Br9  0.88 2.84 3.556(5) 139.2 2_546 
N12 H12B Br1  0.88 2.91 3.627(5) 139.5 2_546 
C6  H6   Br6  0.95 2.87 3.531(5) 128.1 2_546 
 
_refine_diff_density_max    2.285 
_refine_diff_density_min   -1.345 
_refine_diff_density_rms    0.209 
  
_shelx_res_file 
; 
  
    FA2PbBr4m2.res created by SHELXL-2014/7 
  
  
TITL FA2PbBr4m2 in P2(1)/n 
CELL  0.71073  13.4125  11.8703  23.7252   90.000  102.029   90.000 
ZERR    4.000   0.0003   0.0003   0.0006    0.000    0.001    0.000 
LATT  1 
SYMM 1/2-X, 1/2+Y, 1/2-Z 
SFAC C H N BR PB 
UNIT 24 120 48 48 12 
TEMP -173.0 
SIZE 0.15 0.15 0.20 
  
OMIT -2 58 
OMIT     2   1   1 
OMIT    -3   1   3 
OMIT    -1   1   4 
OMIT     1   1   5 
OMIT    -2   2   3 
OMIT    -1   1   3 
OMIT     1   2   4 
OMIT    -3   1   7 
OMIT     1   1   0 
OMIT    -2   1   3 
OMIT     0   1   4 
OMIT     3   1   6 
OMIT     1   1   4 
OMIT     2   3   1 
OMIT    -3   2   2 
OMIT    -4   1  11 
OMIT     0   2   5 
OMIT     3   1   5 
OMIT    -2   1   1 
OMIT     1   1   1 
OMIT    -2   2   4 
OMIT    -6   1  10 
OMIT     0   3   8 
OMIT    -3   1  11 
OMIT    -1   1   8 
OMIT    -2   3   4 
OMIT     4   1   2 
OMIT    -3   3   3 
OMIT    -4   1   4 
OMIT    -4   0  10 
OMIT     0   1   3 
OMIT    -1   2  12 
OMIT    -3   1   2 
OMIT    -1   2   4 
OMIT     2   1   3 
OMIT     2   4   4 
OMIT     0   1   5 
OMIT    -2   6   2 
OMIT    -7   6  13 
OMIT     3   6   9 
OMIT     1   4   1 
OMIT     2   2   1 
OMIT    -4   7   4 
OMIT     1   1  13 
OMIT    -1   6   6 
OMIT    -4   2  11 
OMIT    -7   1   9 
OMIT    -3   6  15 
OMIT    -1   5  10 
OMIT    -4   8   1 
OMIT    -6   5   6 
OMIT     2   4   3 
OMIT     2   1   9 
OMIT    -2   6  10 
OMIT     0   1   8 
OMIT    -2   1  11 
OMIT     2   6   7 
OMIT    -7   1   1 
OMIT     1   6   2 
OMIT    -4   6   4 
OMIT     1   1   2 
OMIT     1   2   1 
OMIT     1   3   5 
OMIT    -6   3   5 
OMIT     1   3   2 
OMIT    -1   2   6 
OMIT     1   8  10 
OMIT    -2  12  11 
OMIT     0   1  18 
OMIT    -1   1  16 
OMIT    -5  12   1 
OMIT    -2   6  13 
OMIT   -12   4   9 
OMIT    -1   8  11 
OMIT    -2   1   8 
OMIT   -11   6  11 
L.S. 12 
BOND $H 
ACTA 
CONF 
EQIV $1 x, y+1, z 
HTAB N1 Br12_$1 
HTAB N1 Br3 
EQIV $2 -x+1, -y+2, -z+1 
HTAB N2 Br8_$2 
HTAB N2 Br9_$2 
EQIV $3 x-1/2, -y+3/2, z-1/2 
HTAB N2 Br10_$3 
HTAB C1 Br10_$3 
EQIV $4 -x+3/2, y+1/2, -z+3/2 
HTAB N3 Br8_$4 
HTAB N3 Br10 
HTAB N4 Br1_$4 
HTAB N4 Br5_$4 
HTAB N4 Br11_$4 
EQIV $5 x+1/2, -y+3/2, z+1/2 
HTAB C2 Br5_$5 
HTAB N5 Br1 
EQIV $6 -x+3/2, y-1/2, -z+3/2 
HTAB N5 Br7_$6 
HTAB N6 Br6 
EQIV $7 -x+1/2, y+1/2, -z+3/2 
HTAB N6 Br12_$7 
EQIV $8 -x+1/2, y-1/2, -z+3/2 
HTAB N6 Br3_$8 
HTAB N6 Br4_$8 
HTAB N7 Br5 
HTAB N7 Br7_$3 
HTAB N7 Br9_$2 
HTAB N8 Br4 
HTAB N8 Br5 
HTAB N8 Br11_$1 
HTAB C4 Br1_$2 
HTAB N9 Br10_$8 
EQIV $9 -x, -y+1, -z+1 
HTAB N9 Br2_$9 
HTAB N9 Br5_$9 
HTAB N10 Br12 
HTAB N10 Br3 
HTAB C5 Br12_$9 
EQIV $10 x-1, y, z 
HTAB N11 Br8_$10 
HTAB N11 Br6 
HTAB N12 Br9_$8 
HTAB N12 Br1_$8 
HTAB N12 Br6_$8 
HTAB C6 Br6_$8 
  
WGHT    0.020400   25.000000 
EXTI    0.000407 
FVAR       0.07406 
PB1   5    0.305544    0.782083    0.624879    11.00000    0.00854    0.01325 = 
         0.01224    0.00012    0.00496    0.00017 
PB2   5    0.751252    0.764153    0.748410    11.00000    0.00762    0.01255 = 
         0.01360   -0.00023    0.00366    0.00051 
PB3   5    0.294932    0.285257    0.627088    11.00000    0.00797    0.01368 = 
         0.01304    0.00040    0.00457   -0.00020 
BR1   4    0.538783    0.754294    0.672463    11.00000    0.00962    0.02103 = 
         0.01861    0.00044    0.00195   -0.00048 
BR2   4    0.263497    0.532857    0.627159    11.00000    0.01802    0.01316 = 
         0.02662   -0.00081    0.00793   -0.00021 
BR3   4    0.088688    0.816593    0.585755    11.00000    0.00940    0.02388 = 
         0.02085    0.00286    0.00309    0.00004 
BR4   4    0.326325    1.031535    0.619037    11.00000    0.01662    0.01338 = 
         0.02196    0.00052    0.00732   -0.00104 
BR5   4    0.343591    0.756625    0.508926    11.00000    0.02173    0.02292 = 
         0.01479    0.00016    0.00885    0.00396 
BR6   4    0.283246    0.789796    0.751851    11.00000    0.01983    0.02475 = 
         0.01524   -0.00181    0.00876   -0.00514 
BR7   4    0.965413    0.780572    0.814327    11.00000    0.01064    0.02502 = 
         0.01830   -0.00229    0.00202    0.00237 
BR8   4    0.827697    0.737283    0.638255    11.00000    0.01553    0.02597 = 
         0.02062   -0.00178    0.00941    0.00041 
BR9   4    0.738108    1.014211    0.734915    11.00000    0.01983    0.01302 = 
         0.02221    0.00008    0.00569   -0.00045 
BR10  4    0.655976    0.779871    0.849331    11.00000    0.02913    0.02666 = 
         0.01985    0.00440    0.01370    0.00519 
BR11  4    0.349315    0.316885    0.518500    11.00000    0.02216    0.02092 = 
         0.01495   -0.00076    0.01011   -0.00334 
BR12  4    0.087857    0.254045    0.569731    11.00000    0.01067    0.02627 = 
         0.02605   -0.00135    0.00158   -0.00234 
N1    3    0.122613    1.017372    0.486189    11.00000    0.02556    0.03026 = 
         0.02150    0.00169    0.00754    0.01025 
AFIX  93 
H1A   2    0.124008    1.091097    0.482537    11.00000   -1.20000 
H1B   2    0.113913    0.987237    0.518709    11.00000   -1.20000 
AFIX   0 
N2    3    0.146508    0.987817    0.394314    11.00000    0.01766    0.03005 = 
         0.02122   -0.00078    0.00410    0.00050 
AFIX  93 
H2A   2    0.148756    1.060500    0.387381    11.00000   -1.20000 
H2B   2    0.153239    0.938839    0.367513    11.00000   -1.20000 
AFIX   0 
C1    1    0.133375    0.953146    0.443653    11.00000    0.01094    0.02051 = 
         0.02179    0.00317    0.00099    0.00230 
AFIX  43 
H1    2    0.131407    0.874033    0.449372    11.00000   -1.20000 
AFIX   0 
N3    3    0.823646    0.998044    0.893200    11.00000    0.02197    0.02876 = 
         0.02356   -0.00513    0.00447    0.00360 
AFIX  93 
H3A   2    0.809233    1.069480    0.885603    11.00000   -1.20000 
H3B   2    0.775054    0.947045    0.885783    11.00000   -1.20000 
AFIX   0 
N4    3    0.993344    1.035780    0.927854    11.00000    0.02112    0.02027 = 
         0.02835   -0.00022    0.01127    0.00255 
AFIX  93 
H4A   2    0.984914    1.108536    0.921480    11.00000   -1.20000 
H4B   2    1.054269    1.008931    0.942815    11.00000   -1.20000 
AFIX   0 
C2    1    0.915952    0.968101    0.915197    11.00000    0.02502    0.01625 = 
         0.01679   -0.00182    0.01245   -0.00197 
AFIX  43 
H2    2    0.928295    0.890187    0.922747    11.00000   -1.20000 
AFIX   0 
N5    3    0.488434    0.525943    0.749522    11.00000    0.02356    0.03196 = 
         0.02593    0.00579    0.01353    0.00356 
AFIX  93 
H5A   2    0.488815    0.598541    0.742057    11.00000   -1.20000 
H5B   2    0.519073    0.478437    0.730244    11.00000   -1.20000 
AFIX   0 
N6    3    0.395799    0.550358    0.819573    11.00000    0.03606    0.03179 = 
         0.04071    0.00362    0.02520    0.00595 
AFIX  93 
H6A   2    0.392719    0.623870    0.814725    11.00000   -1.20000 
H6B   2    0.366623    0.518646    0.845526    11.00000   -1.20000 
AFIX   0 
C3    1    0.442999    0.489191    0.788690    11.00000    0.01657    0.02073 = 
         0.02506   -0.00211    0.00677   -0.00129 
AFIX  43 
H3    2    0.444457    0.410232    0.795343    11.00000   -1.20000 
AFIX   0 
N7    3    0.412417    0.929805    0.407916    11.00000    0.02865    0.05079 = 
         0.02073   -0.01103    0.01199   -0.00469 
AFIX  93 
H7A   2    0.403940    0.869425    0.427921    11.00000   -1.20000 
H7B   2    0.428535    0.922759    0.373983    11.00000   -1.20000 
AFIX   0 
N8    3    0.377325    1.047176    0.478356    11.00000    0.02296    0.02045 = 
         0.02978   -0.00257    0.00642    0.00203 
AFIX  93 
H8A   2    0.367884    0.990043    0.500295    11.00000   -1.20000 
H8B   2    0.370724    1.116642    0.490009    11.00000   -1.20000 
AFIX   0 
C4    1    0.401195    1.028826    0.428369    11.00000    0.02165    0.03604 = 
         0.02517    0.01261    0.00603   -0.00098 
AFIX  43 
H4    2    0.410872    1.092298    0.405714    11.00000   -1.20000 
AFIX   0 
N9    3   -0.147431    0.450419    0.526761    11.00000    0.04675    0.12941 = 
         0.02230    0.00073    0.00607   -0.05708 
AFIX  93 
H9A   2   -0.124022    0.382372    0.536528    11.00000   -1.20000 
H9B   2   -0.209335    0.459198    0.505867    11.00000   -1.20000 
AFIX   0 
N10   3   -0.003583    0.537837    0.572203    11.00000    0.02179    0.04781 = 
         0.04078   -0.02141    0.00962   -0.00549 
AFIX  93 
H10A  2    0.028330    0.474987    0.584657    11.00000   -1.20000 
H10B  2    0.027011    0.603137    0.580521    11.00000   -1.20000 
AFIX   0 
C5    1   -0.092928    0.534336    0.542514    11.00000    0.02713    0.03983 = 
         0.03234    0.00976    0.01701    0.00826 
AFIX  43 
H5    2   -0.122876    0.605195    0.530484    11.00000   -1.20000 
AFIX   0 
N11   3    0.063823    0.645074    0.705430    11.00000    0.01749    0.02328 = 
         0.03504    0.00191    0.01304   -0.00098 
AFIX  93 
H11A  2    0.001744    0.671787    0.693762    11.00000   -1.20000 
H11B  2    0.116864    0.687428    0.703517    11.00000   -1.20000 
AFIX   0 
N12   3    0.004652    0.475359    0.729892    11.00000    0.02336    0.02807 = 
         0.04661    0.01168    0.00171   -0.00641 
AFIX  93 
H12A  2   -0.059306    0.496694    0.718998    11.00000   -1.20000 
H12B  2    0.019122    0.407268    0.743891    11.00000   -1.20000 
AFIX   0 
C6    1    0.077077    0.543787    0.725348    11.00000    0.01688    0.02596 = 
         0.01915   -0.00036    0.00554    0.00127 
AFIX  43 
H6    2    0.145166    0.517830    0.737537    11.00000   -1.20000 
  
AFIX   0 
HKLF 4 
  
REM  FA2PbBr4m2 in P2(1)/n 
REM R1 =  0.0244 for    9222 Fo > 4sig(Fo)  and  0.0263 for all    9741 data 
REM    299 parameters refined using      0 restraints 
  
END 
  
WGHT      0.0204     15.1643 
  
REM Highest difference peak  2.285,  deepest hole -1.345,  1-sigma level  0.209 
Q1    1   0.2404  0.7820  0.6120  11.00000  0.05    2.29 
Q2    1   0.2966  0.2202  0.6292  11.00000  0.05    2.28 
Q3    1   0.3568  0.2852  0.6399  11.00000  0.05    2.17 
Q4    1   0.3720  0.7777  0.6361  11.00000  0.05    2.13 
Q5    1   0.3027  0.7174  0.6219  11.00000  0.05    2.10 
Q6    1   0.2258  0.2779  0.6146  11.00000  0.05    2.07 
Q7    1   0.2960  0.3535  0.6298  11.00000  0.05    2.07 
Q8    1   0.8198  0.7611  0.7609  11.00000  0.05    1.87 
Q9    1   0.7551  0.8289  0.7503  11.00000  0.05    1.83 
Q10   1   0.3031  0.8460  0.6221  11.00000  0.05    1.77 
Q11   1   0.7531  0.7049  0.7508  11.00000  0.05    1.70 
Q12   1   0.6840  0.7642  0.7375  11.00000  0.05    1.70 
Q13   1   0.2857  0.7796  0.6598  11.00000  0.05    1.50 
Q14   1   0.3223  0.7809  0.5913  11.00000  0.05    1.41 
Q15   1   0.3143  0.2832  0.5930  11.00000  0.05    1.40 
Q16   1   0.7734  0.7649  0.7132  11.00000  0.05    1.39 
Q17   1   0.6754  1.0174  0.7237  11.00000  0.05    1.21 
Q18   1  -0.0791  0.4692  0.5531  11.00000  0.05    1.20 
Q19   1   0.8204  0.7979  0.6342  11.00000  0.05    1.19 
Q20   1   0.3409  0.6966  0.5082  11.00000  0.05    1.18 
; 
_shelx_res_checksum   86299 
  
_shelx_hkl_file 
; 
  -3   0   0    0.70    0.70 
  -3   0   0    0.90    0.60 
  -3   0   0    1.50    0.60 
   3   0   0    0.40    0.50 
   3   0   0    0.50    0.40 
   3   0   0    1.70    0.70 
   3   0   0    0.40    0.50 
   3   0   0   -1.40    0.90 
   3   0   0    0.60    0.80 
   3   0   0   -0.10    0.50 
   4   0   0  412.56   35.00 
   4   0   0  512.05   34.70 
   4   0   0  447.06   34.70 
   4   0   0  505.35   34.60 
   4   0   0  461.85   34.60 
  -4   0   0  437.96   34.80 
  -4   0   0  502.05   34.80 
  -4   0   0  521.15   34.70 
   4   0   0  433.96   35.10 
   5   0   0    0.40    0.60 
   5   0   0   -0.10    0.80 
   5   0   0    0.10    0.70 
  -5   0   0    1.00    1.00 
  -5   0   0    0.90    1.10 
  -5   0   0    1.60    0.80 
   5   0   0    0.70    1.50 
  -6   0   0    1.40    0.90 
   6   0   0    2.90    1.20 
  -6   0   0    1.10    1.10 
  -6   0   0    2.50    1.10 
   6   0   0    1.50    1.50 
   6   0   0    1.30    0.90 
  -7   0   0    1.60    1.30 
  -7   0   0    1.90    1.30 
   7   0   0    1.80    0.80 
   7   0   0    4.90    1.80 
   7   0   0    2.30    1.10 
  -7   0   0    1.80    1.10 
  -8   0   0  113.89    9.80 
   8   0   0  130.79   10.10 
   8   0   0  114.09    9.30 
  -8   0   0  115.09    9.40 
   8   0   0  125.19    9.40 
  -8   0   0  138.29    9.80 
   9   0   0    2.00    1.90 
   9   0   0    4.20    1.40 
   9   0   0    4.80    1.00 
  -9   0   0    3.10    1.80 
  -9   0   0    2.50    1.40 
  -9   0   0    3.40    1.70 
 -10   0   0   11.10    2.50 
 -10   0   0   17.40    2.40 
  10   0   0   19.10    2.40 
  10   0   0   19.00    3.10 
 -10   0   0   20.70    2.70 
  11   0   0   -0.20    1.60 
 -11   0   0    3.70    1.60 
 -11   0   0   -3.80    1.70 
 -11   0   0    1.00    2.10 
  11   0   0   -1.30    2.00 
  12   0   0  159.78   11.60 
  12   0   0  164.78   12.30 
 -12   0   0  136.39   12.10 
 -12   0   0  131.79   11.50 
 -13   0   0    0.60    1.80 
  13   0   0    0.40    2.40 
 -13   0   0    0.00    2.10 
  13   0   0    1.90    1.70 
 -13   0   0    3.80    2.60 
  14   0   0  156.68   14.60 
  14   0   0  195.08   12.30 
 -14   0   0  133.09   13.00 
 -14   0   0  133.89   12.70 
 -15   0   0    1.20    1.90 
  15   0   0   -1.50    2.50 
  15   0   0   -0.90    1.40 
 -15   0   0   -0.30    2.30 
 -15   0   0   -3.10    2.60 
  16   0   0    9.30    2.90 
 -16   0   0    7.80    2.30 
  16   0   0    9.80    1.50 
 -16   0   0   10.20    2.80 
 -16   0   0    8.30    3.10 
 -17   0   0   -1.00    2.80 
 -17   0   0    1.10    1.90 
  17   0   0    2.60    2.80 
 -17   0   0   -1.00    2.40 
 -18   0   0  382.36   27.90 
 -18   0   0  360.56   28.70 
 -19   0   0    0.50    3.30 
 -19   0   0    0.70    1.70 
  19   0   0   -1.60    2.70 
 -19   0   0   -1.50    2.20 
  -1  -1   0   15.10    1.20 
  -1  -1   0   12.90    1.00 
  -1  -1   0   14.40    1.00 
   1   1   0   10.40    1.10 
  -1   1   0   12.80    1.10 
  -1   1   0   14.30    1.00 
  -1   1   0   14.80    1.00 
   1   1   0    9.10    1.10 
  -1   1   0    9.90    1.00 
   1   1   0    9.70    1.00 
   2  -1   0   16.90    1.50 
  -2  -1   0   14.00    1.50 
   2  -1   0   15.90    1.40 
  -2  -1   0   15.20    1.20 
  -2  -1   0   18.00    1.50 
  -2  -1   0   16.80    1.30 
   2  -1   0   14.90    1.40 
   2  -1   0   12.20    1.40 
  -2  -1   0   17.20    1.50 
  -2   1   0   16.90    1.30 
   2   1   0   15.30    1.50 
   2   1   0   14.80    1.40 
  -2   1   0   17.80    1.40 
   2   1   0   15.40    1.50 
   2   1   0   14.40    1.50 
  -2   1   0   16.40    1.60 
  -2   1   0   12.80    1.40 
  -2   1   0   15.40    1.30 
   2   1   0   15.50    1.30 
   2   1   0   16.60    1.20 
  -2   1   0   13.20    1.40 
  -3  -1   0   43.60    4.00 
   3  -1   0   45.30    3.90 
   3  -1   0   47.00    3.90 
   3  -1   0   48.40    4.00 
   3  -1   0   45.00    4.20 
   3  -1   0   54.59    3.90 
  -3  -1   0   49.70    4.00 
  -3  -1   0   49.60    3.80 
  -3   1   0   46.40    3.90 
  -3   1   0   52.79    3.80 
   3   1   0   54.49    3.70 
   3   1   0   55.89    4.10 
  -3   1   0   43.00    4.00 
  -3   1   0   53.69    4.00 
   3   1   0   54.09    4.00 
   3   1   0   49.00    3.80 
  -4  -1   0  102.29    9.40 
   4  -1   0  138.89    9.10 
  -4  -1   0  115.39    9.20 
   4  -1   0  113.39    9.20 
   4  -1   0  129.39    9.20 
  -4  -1   0  128.69    9.20 
  -4  -1   0  121.09    9.00 
   4  -1   0  109.39    9.10 
  -4   1   0  115.39    9.50 
   4   1   0  113.29    9.10 
   4   1   0  127.89    9.20 
   4   1   0  121.59    9.20 
  -4   1   0  119.49    9.20 
  -4   1   0  130.89    9.00 
   5  -1   0   38.60    3.50 
   5  -1   0   40.40    3.70 
  -5  -1   0   37.60    3.70 
  -5  -1   0   43.30    3.80 
   5  -1   0   44.70    3.60 
  -5  -1   0   41.90    3.70 
  -5  -1   0   46.00    3.30 
  -5   1   0   45.80    3.40 
   5   1   0   40.70    3.70 
  -5   1   0   38.40    4.10 
   6  -1   0  107.89    8.50 
   6  -1   0  119.09    8.60 
   6  -1   0  116.19    8.70 
  -6  -1   0  114.19    8.80 
  -6  -1   0  103.19    8.60 
  -6  -1   0  111.39    8.60 
  -6   1   0  113.19    8.80 
  -6   1   0  113.89    8.40 
  -6   1   0  117.89    9.00 
   6   1   0   97.89    8.90 
   6   1   0  107.69    8.30 
   6   1   0  105.69    8.50 
   7  -1   0    2.50    1.10 
  -7  -1   0    0.70    1.20 
  -7  -1   0    0.70    1.20 
  -7  -1   0    1.20    1.40 
   7  -1   0    2.50    0.90 
  -7   1   0    0.70    1.30 
   7   1   0    1.70    1.70 
  -7   1   0   -0.50    1.30 
  -7   1   0    1.00    0.90 
   7   1   0    0.60    0.60 
   7   1   0   -0.70    1.10 
  -8  -1   0   10.60    1.90 
   8  -1   0    9.30    2.60 
   8  -1   0   10.40    1.70 
  -8  -1   0   12.20    2.00 
  -8  -1   0    7.10    2.00 
   8   1   0   13.40    1.80 
  -8   1   0   10.10    2.10 
   8   1   0   10.10    2.20 
  -8   1   0   12.00    2.10 
  -8   1   0   14.10    1.60 
   9  -1   0   35.60    3.60 
  -9  -1   0   30.40    3.80 
  -9  -1   0   36.10    3.80 
   9  -1   0   29.50    4.00 
  -9  -1   0   37.40    4.00 
   9   1   0   45.00    4.70 
  -9   1   0   47.20    4.40 
   9   1   0   39.10    3.70 
   9   1   0   36.60    3.10 
  -9   1   0   33.00    3.50 
  -9   1   0   37.60    4.30 
 -10  -1   0   54.59    5.10 
 -10  -1   0   43.60    4.50 
 -10  -1   0   42.80    5.00 
  10  -1   0   47.50    5.40 
  10  -1   0   48.80    4.40 
  10   1   0   41.30    3.50 
 -10   1   0   44.20    4.20 
  10   1   0   45.70    3.80 
  10   1   0   48.00    4.30 
  10   1   0   49.10    5.30 
 -10   1   0   41.70    4.90 
 -11  -1   0   37.30    4.50 
  11  -1   0   42.90    4.30 
  11  -1   0   48.70    5.30 
 -11  -1   0   37.40    4.40 
 -11  -1   0   50.59    4.70 
 -11   1   0   34.70    4.00 
  11   1   0   44.20    4.10 
 -11   1   0   51.29    5.60 
 -11   1   0   37.90    4.50 
  11   1   0   45.20    4.80 
  11   1   0   41.30    3.50 
  12  -1   0   97.19    7.60 
  12  -1   0   93.79    8.20 
 -12  -1   0   88.19    7.70 
 -12  -1   0   84.59    8.20 
  12   1   0  103.09    7.30 
  12   1   0  106.49    8.40 
  12   1   0   83.49    6.90 
 -12   1   0   80.29    7.30 
 -12   1   0   77.69    8.20 
  13  -1   0    0.00    1.80 
 -13  -1   0    3.00    2.10 
  13  -1   0    0.40    2.20 
 -13  -1   0    0.90    1.90 
 -13  -1   0    1.00    2.30 
  13   1   0    3.30    1.30 
  13   1   0    1.90    0.80 
 -13   1   0    2.40    2.40 
  13   1   0    1.80    2.40 
 -13   1   0    6.40    2.50 
 -13   1   0    0.50    1.60 
  14  -1   0    9.10    2.20 
  14  -1   0    8.10    3.20 
 -14  -1   0    6.50    2.80 
 -14  -1   0    9.60    2.50 
 -14  -1   0    7.20    2.30 
 -14   1   0    7.80    3.00 
 -14   1   0   14.10    2.90 
  15  -1   0    1.40    1.90 
 -15  -1   0   -1.00    2.40 
 -15  -1   0    2.20    2.10 
  15  -1   0    1.30    2.50 
 -15  -1   0    3.70    2.40 
 -15   1   0    4.20    1.90 
  15   1   0    4.70    2.80 
 -15   1   0    3.20    2.50 
 -15   1   0    2.40    2.70 
  16  -1   0   46.20    5.20 
  16  -1   0   52.69    4.80 
 -16  -1   0   34.00    5.20 
 -16  -1   0   37.00    5.10 
 -16  -1   0   62.09    5.60 
 -16   1   0   38.30    4.60 
  16   1   0   47.70    5.40 
 -16   1   0   46.30    5.50 
 -16   1   0   64.99    5.80 
  17  -1   0   19.80    3.70 
 -17  -1   0   38.70    4.00 
 -17  -1   0   26.20    3.50 
 -17  -1   0   25.20    4.40 
 -17   1   0   39.90    4.00 
 -17   1   0   14.40    3.90 
 -17   1   0   23.70    2.90 
  17   1   0   30.70    4.30 
  18  -1   0  118.39    9.60 
 -18  -1   0  106.99   10.00 
 -18  -1   0   97.29    8.80 
  18   1   0  125.59    9.90 
 -18   1   0   99.39    9.90 
 -18   1   0   96.09    8.20 
 -19  -1   0    0.80    2.10 
 -19  -1   0    2.60    2.50 
 -19  -1   0   -0.50    4.50 
  19  -1   0    2.80    2.80 
 -19   1   0    3.50    2.60 
 -19   1   0    2.70    1.40 
 -19   1   0   -0.30    3.40 
  19   1   0    3.60    3.10 
   0  -2   0 4106.09  300.17 
  -1  -2   0  309.97   23.60 
   1  -2   0  290.47   23.50 
  -1  -2   0  306.97   23.40 
   1  -2   0  341.27   23.50 
  -1  -2   0  318.07   23.50 
   1  -2   0  307.27   23.40 
   1  -2   0  348.47   23.50 
  -1  -2   0  310.17   23.40 
   1  -2   0  336.57   23.50 
   1   2   0  342.87   23.50 
  -1   2   0  355.56   23.50 
  -1   2   0  349.96   23.50 
  -1   2   0  294.67   23.50 
  -1   2   0  307.17   23.50 
   1   2   0  305.27   23.40 
   1   2   0  349.77   23.40 
   1   2   0  274.47   23.50 
  -1   2   0  299.47   23.40 
  -2  -2   0 1254.87   93.89 
  -2  -2   0 1275.07   93.89 
   2  -2   0 1409.66   94.19 
  -2  -2   0 1261.47   93.99 
   2  -2   0 1224.88   93.89 
  -2  -2   0 1161.08   93.99 
   2  -2   0 1282.47   93.89 
   2  -2   0 1472.95   93.89 
  -2  -2   0 1182.78   93.79 
  -2   2   0 1355.16   93.89 
   2   2   0 1395.46   94.29 
   2   2   0 1189.18   93.89 
  -2   2   0 1390.96   93.89 
  -2   2   0 1216.08   93.89 
   2   2   0 1353.16   93.89 
   2   2   0 1256.27   93.99 
   2   2   0 1204.18   93.89 
  -2   2   0 1223.88   93.89 
  -3  -2   0   17.60    1.60 
  -3  -2   0   18.30    2.10 
   3  -2   0   18.30    1.90 
  -3  -2   0   20.60    2.00 
   3  -2   0   20.00    2.00 
   3  -2   0   19.70    1.90 
   3  -2   0   17.50    1.90 
  -3  -2   0   14.80    1.80 
  -3  -2   0   15.50    1.60 
  -3   2   0   19.90    1.60 
  -3   2   0   21.80    1.60 
  -3   2   0   15.80    1.90 
   3   2   0   19.50    2.10 
   3   2   0   21.70    1.70 
  -3   2   0   17.60    1.80 
   3   2   0   22.40    2.30 
  -3   2   0   24.00    1.90 
   3   2   0   17.80    1.70 
   3   2   0   20.50    1.80 
  -3   2   0   21.30    2.10 
  -4  -2   0  116.99    8.50 
  -4  -2   0  115.69    8.10 
   4  -2   0  107.09    8.40 
   4  -2   0  106.59    8.40 
   4  -2   0  103.09    8.30 
  -4  -2   0  109.29    8.40 
  -4  -2   0  119.99    8.40 
  -4   2   0  109.29    8.50 
   4   2   0  108.89    8.50 
   4   2   0  100.19    8.10 
   4   2   0  118.39    8.20 
   4   2   0  116.39    8.50 
  -4   2   0  110.99    8.40 
  -4   2   0  105.79    8.10 
  -4   2   0  113.09    8.10 
   4   2   0  102.69    8.30 
  -4   2   0   98.09    8.30 
  -4   2   0   98.69    8.40 
   4   2   0  117.59    8.50 
  -5  -2   0   37.60    2.80 
  -5  -2   0   38.70    3.40 
  -5  -2   0   40.10    3.40 
   5  -2   0   32.50    3.20 
   5  -2   0   40.60    3.30 
  -5  -2   0   38.80    3.50 
  -5   2   0   41.80    3.50 
   5   2   0   40.30    2.90 
  -5   2   0   33.00    3.30 
   5   2   0   32.30    2.90 
  -5   2   0   31.20    3.00 
  -5   2   0   38.90    2.90 
  -5   2   0   33.80    3.80 
   5   2   0   31.40    3.60 
  -6  -2   0   49.90    3.80 
  -6  -2   0   51.29    4.40 
   6  -2   0   53.79    4.30 
   6  -2   0   52.99    4.40 
  -6  -2   0   51.69    4.50 
  -6  -2   0   53.99    4.40 
   6   2   0   41.50    3.90 
  -6   2   0   54.89    3.90 
  -6   2   0   37.70    4.30 
  -6   2   0   53.79    4.90 
   6   2   0   42.40    4.70 
  -6   2   0   49.10    4.40 
  -7  -2   0   30.80    3.00 
  -7  -2   0   26.10    3.10 
  -7  -2   0   21.40    2.70 
   7  -2   0   29.30    2.90 
   7   2   0   21.20    2.50 
  -7   2   0   21.60    2.90 
  -7   2   0   24.10    2.90 
   7   2   0   21.20    3.00 
  -7   2   0   28.20    2.40 
  -7   2   0   26.90    3.10 
  -8  -2   0  669.53   44.30 
   8  -2   0  649.34   44.20 
  -8  -2   0  600.34   44.30 
  -8  -2   0  608.34   44.30 
   8   2   0  553.04   44.40 
   8   2   0  540.15   43.80 
  -8   2   0  616.04   44.40 
  -8   2   0  608.84   43.90 
  -8   2   0  650.43   44.50 
  -8   2   0  532.55   44.30 
   8   2   0  553.84   43.80 
  -9  -2   0  348.57   25.90 
  -9  -2   0  348.97   25.80 
   9  -2   0  365.86   25.60 
   9   2   0  324.17   25.20 
   9   2   0  336.77   25.30 
   9   2   0  348.17   26.10 
  -9   2   0  361.16   26.00 
  -9   2   0  321.47   25.90 
  -9   2   0  336.77   25.40 
  10  -2   0   24.60    3.90 
 -10  -2   0   23.20    3.30 
 -10  -2   0   33.30    3.70 
 -10  -2   0   22.30    3.10 
  10  -2   0   28.10    3.00 
 -10   2   0   19.60    3.10 
 -10   2   0   30.50    2.90 
 -10   2   0   36.60    4.10 
  10   2   0   24.90    2.30 
  10   2   0   28.10    3.70 
 -11  -2   0  117.39    9.70 
 -11  -2   0  142.49    9.90 
  11  -2   0  116.49   10.50 
 -11  -2   0  115.39   10.10 
  11  -2   0  117.99    9.60 
 -11   2   0  110.79    9.20 
  11   2   0  130.69   10.40 
 -11   2   0  106.99   10.00 
  12  -2   0   66.59    6.70 
  12  -2   0   71.29    6.20 
 -12  -2   0   52.19    6.40 
 -12  -2   0   61.89    6.10 
 -12  -2   0   79.29    6.30 
 -12   2   0   57.29    6.50 
  12   2   0   74.89    6.90 
 -12   2   0   56.79    5.40 
 -13  -2   0   53.59    6.20 
 -13  -2   0   75.29    6.50 
 -13  -2   0   65.49    6.90 
  13  -2   0   64.59    6.80 
  13  -2   0   62.49    6.10 
 -13   2   0   59.39    6.80 
  13   2   0   75.69    7.20 
 -13   2   0   71.49    5.70 
 -14  -2   0   20.90    3.60 
 -14  -2   0   25.60    3.40 
  14  -2   0   26.20    3.30 
 -14  -2   0   28.80    3.60 
 -14   2   0   35.40    4.00 
 -14   2   0   17.90    4.00 
  14   2   0   20.30    3.70 
  15  -2   0   68.09    7.20 
 -15  -2   0   64.09    7.40 
 -15  -2   0   93.49    7.20 
 -15  -2   0   68.99    6.90 
  15  -2   0   80.99    6.70 
 -15   2   0   62.89    7.40 
 -15   2   0   64.79    6.00 
  15   2   0   82.99    7.80 
 -16  -2   0   32.50    4.20 
 -16  -2   0   24.60    4.50 
  16  -2   0   40.80    4.80 
  16  -2   0   50.69    4.80 
 -16  -2   0   46.10    5.20 
  16   2   0   51.39    5.10 
 -16   2   0   54.79    5.30 
 -16   2   0   31.60    3.70 
 -16   2   0   32.40    4.70 
  17  -2   0    1.30    1.90 
 -17  -2   0    1.10    2.30 
 -17  -2   0    0.70    2.70 
  17  -2   0   -0.20    2.60 
 -17  -2   0    4.30    3.00 
 -17   2   0    1.20    2.80 
 -17   2   0    2.40    2.30 
  17   2   0    5.20    3.20 
  18  -2   0  464.75   31.10 
 -18  -2   0  414.26   30.70 
 -18  -2   0  387.56   31.20 
 -18   2   0  364.36   31.20 
 -19  -2   0   39.00    4.10 
  19  -2   0   20.00    3.90 
  19   2   0   31.00    5.30 
 -19   2   0   15.40    4.90 
 -19   2   0   33.00    3.60 
   0  -3   0   19.60    2.20 
   0  -3   0   22.10    2.20 
   0   3   0   26.90    2.30 
   1  -3   0   89.29    6.70 
   1  -3   0   90.69    7.00 
   1  -3   0   83.49    6.90 
  -1  -3   0   84.39    7.00 
  -1  -3   0   96.99    6.80 
   1  -3   0   98.09    6.80 
  -1  -3   0   91.09    6.70 
  -1  -3   0   83.49    6.70 
   1  -3   0   94.99    6.90 
  -1  -3   0   82.69    7.10 
  -1  -3   0   90.29    7.00 
   1   3   0   94.79    6.80 
  -1   3   0   99.49    6.80 
  -1   3   0   86.99    6.90 
  -1   3   0   85.89    6.70 
   1   3   0   86.29    6.90 
   1   3   0   93.69    7.10 
   1   3   0   86.29    6.70 
  -1   3   0   87.29    7.00 
  -1   3   0   94.79    6.90 
   1   3   0   92.99    6.70 
   1   3   0   83.19    7.00 
   2  -3   0  336.17   25.30 
   2  -3   0  356.16   25.20 
   2  -3   0  369.76   25.30 
   2  -3   0  306.27   25.40 
  -2  -3   0  334.87   25.20 
   2  -3   0  320.37   25.20 
  -2  -3   0  344.37   25.40 
  -2  -3   0  356.86   25.30 
  -2  -3   0  324.87   25.50 
  -2  -3   0  340.57   25.20 
   2  -3   0  365.16   25.20 
  -2   3   0  337.97   25.20 
   2   3   0  365.76   25.50 
  -2   3   0  332.87   25.30 
   2   3   0  361.76   25.30 
   2   3   0  323.37   25.20 
   2   3   0  324.27   25.20 
   2   3   0  359.06   25.20 
  -2   3   0  308.67   25.40 
  -2   3   0  385.56   25.30 
  -3  -3   0    0.70    0.60 
  -3  -3   0    1.10    0.50 
  -3  -3   0    1.00    1.00 
  -3  -3   0    0.40    1.00 
   3  -3   0    1.20    0.60 
   3  -3   0    0.90    0.60 
   3  -3   0    2.00    1.10 
   3  -3   0    1.20    0.50 
  -3  -3   0    1.70    0.80 
   3  -3   0    1.30    0.60 
   3   3   0    0.90    0.60 
   3   3   0    2.50    0.70 
  -3   3   0    2.60    1.00 
   3   3   0    1.50    0.80 
  -3   3   0    1.10    0.70 
  -3   3   0    1.10    0.80 
   3   3   0    1.70    0.90 
  -3   3   0    1.00    0.60 
  -4  -3   0  166.18   13.70 
  -4  -3   0  195.38   13.90 
   4  -3   0  185.68   13.80 
  -4  -3   0  180.88   13.70 
   4  -3   0  175.68   13.80 
  -4   3   0  163.08   14.00 
   4   3   0  172.68   13.80 
  -4   3   0  199.38   13.70 
   4   3   0  195.68   14.10 
   4   3   0  183.58   13.70 
  -4   3   0  192.58   13.90 
  -4   3   0  168.28   13.80 
  -4   3   0  203.98   14.00 
  -4   3   0  209.28   13.70 
  -5  -3   0   26.40    2.80 
   5  -3   0   27.60    2.60 
  -5  -3   0   21.30    2.20 
  -5  -3   0   29.20    3.00 
  -5  -3   0   27.80    2.90 
  -5  -3   0   25.00    2.10 
  -5   3   0   26.60    2.80 
  -5   3   0   30.40    2.80 
  -5   3   0   27.80    3.00 
   5   3   0   26.90    2.20 
  -5   3   0   30.50    2.20 
  -5   3   0   29.40    2.20 
  -5   3   0   22.80    2.50 
   5   3   0   20.70    2.70 
  -6  -3   0    2.90    1.30 
  -6  -3   0    2.70    1.30 
  -6  -3   0    5.80    1.50 
  -6  -3   0    4.70    0.70 
  -6   3   0    3.60    1.10 
   6   3   0    6.00    1.70 
  -6   3   0    5.20    1.40 
  -6   3   0    1.20    1.60 
  -7  -3   0    0.80    1.30 
  -7  -3   0    0.10    1.40 
  -7  -3   0    0.20    1.20 
   7  -3   0    0.70    1.40 
  -7   3   0    0.80    1.30 
  -7   3   0    3.00    0.80 
  -7   3   0    2.50    1.30 
  -7   3   0    0.10    1.60 
   7   3   0    3.40    1.70 
  -8  -3   0   37.60    3.90 
   8  -3   0   30.40    3.50 
  -8  -3   0   28.40    3.50 
  -8  -3   0   23.10    3.00 
  -8   3   0   36.50    3.70 
  -8   3   0   26.40    2.50 
  -8   3   0   26.90    3.10 
   8   3   0   16.30    3.00 
  -8   3   0   24.20    2.90 
  -9  -3   0    1.10    1.60 
   9  -3   0    1.50    1.70 
  -9  -3   0    2.50    1.80 
  -9  -3   0    3.00    1.70 
  -9   3   0    3.60    1.70 
  -9   3   0    1.10    1.00 
  -9   3   0    2.70    2.10 
   9   3   0    5.30    2.20 
  -9   3   0    1.40    0.90 
  -9   3   0    2.10    1.80 
 -10  -3   0  246.58   19.90 
 -10  -3   0  251.57   20.00 
 -10  -3   0  291.77   19.90 
 -10   3   0  241.78   19.20 
  10   3   0  231.88   20.10 
 -10   3   0  298.17   19.90 
 -10   3   0  245.88   20.00 
 -10   3   0  271.87   20.00 
  11  -3   0    3.80    1.90 
 -11  -3   0    5.80    2.40 
 -11  -3   0    3.90    2.10 
 -11  -3   0    4.40    2.00 
  11   3   0    1.40    2.60 
 -11   3   0    2.00    1.10 
 -11   3   0    3.30    2.30 
 -11   3   0    0.20    2.10 
 -11   3   0    2.60    1.10 
 -12  -3   0   95.09    9.30 
 -12  -3   0  126.49    9.50 
  12  -3   0  109.49    9.20 
  12  -3   0  107.39   10.10 
 -12  -3   0   93.99    9.60 
 -12   3   0  102.39    9.60 
  12   3   0  130.99   10.20 
 -12   3   0  108.59    8.60 
 -12   3   0  138.19    9.60 
  13  -3   0   14.40    2.70 
 -13  -3   0   14.80    2.90 
  13  -3   0   14.20    3.20 
 -13  -3   0   16.10    2.90 
 -13  -3   0   14.30    3.20 
  13   3   0   18.20    3.70 
 -13   3   0   12.00    3.10 
 -13   3   0   23.80    3.10 
  14  -3   0    3.90    2.10 
 -14  -3   0    3.90    2.40 
  14  -3   0    2.10    2.60 
 -14  -3   0    8.30    2.50 
 -14  -3   0    4.60    2.80 
 -14   3   0    8.20    2.50 
  14   3   0    7.90    3.00 
 -14   3   0    3.00    2.60 
  15  -3   0   27.10    3.30 
 -15  -3   0   19.60    3.40 
 -15  -3   0   24.80    3.50 
  15  -3   0   18.70    3.60 
 -15  -3   0   19.30    3.70 
 -15   3   0   19.10    3.80 
 -15   3   0   37.00    3.80 
  15   3   0   24.80    4.10 
 -16  -3   0    8.90    2.60 
 -16  -3   0   11.00    2.80 
  16  -3   0   10.80    2.60 
  16  -3   0    7.40    2.90 
 -16  -3   0    5.70    3.10 
  16   3   0   13.50    3.50 
 -16   3   0   12.20    2.60 
 -16   3   0    8.10    3.30 
  17  -3   0   50.09    5.60 
 -17  -3   0   40.20    5.10 
 -17  -3   0   59.49    5.90 
 -17  -3   0   37.70    5.50 
  17  -3   0   59.19    5.60 
 -17   3   0   64.89    5.50 
 -17   3   0   43.80    5.70 
  17   3   0   55.39    6.00 
 -18  -3   0   64.99    6.10 
  18  -3   0   58.89    5.40 
 -18  -3   0   41.30    5.60 
  18  -3   0   49.80    5.60 
 -18  -3   0   35.90    5.00 
  18   3   0   54.39    5.90 
 -18   3   0   62.89    5.40 
 -18   3   0   39.10    5.60 
 -19  -3   0    1.80    2.50 
 -19  -3   0    4.80    3.40 
 -19  -3   0   10.00    2.70 
  19  -3   0    5.00    3.30 
  19   3   0    4.70    5.00 
 -19   3   0    7.10    2.10 
   0  -4   0 9566.84  699.03 
   1  -4   0 1996.60  143.49 
  -1  -4   0 2052.99  143.29 
  -1  -4   0 2009.20  143.69 
  -1  -4   0 2011.30  143.19 
   1  -4   0 2158.68  143.59 
  -1  -4   0 1905.91  143.39 
   1   4   0 2149.28  143.39 
  -1   4   0 2082.79  143.49 
  -1   4   0 1815.72  143.39 
   1   4   0 1810.22  143.29 
  -1   4   0 1825.12  143.49 
   1   4   0 1799.82  143.39 
   1   4   0 1791.62  143.49 
   1   4   0 2024.50  143.19 
  -2  -4   0 2122.89  163.18 
  -2  -4   0 2074.89  163.18 
   2  -4   0 2307.57  163.38 
   2  -4   0 2445.06  163.48 
  -2  -4   0 2188.68  163.28 
  -2  -4   0 2073.89  163.58 
   2  -4   0 2221.88  163.18 
   2   4   0 2433.86  163.38 
   2   4   0 2057.69  163.48 
  -2   4   0 2264.87  163.38 
  -2   4   0 2207.68  163.18 
   2   4   0 2083.09  163.38 
   2   4   0 2223.58  163.18 
  -2   4   0 2553.14  163.38 
  -3  -4   0  127.59    9.50 
   3  -4   0  121.59    9.50 
   3  -4   0  136.39    9.40 
  -3  -4   0  130.99    9.90 
  -3  -4   0  115.29    9.40 
  -3  -4   0  118.59    9.80 
  -3  -4   0  129.09    9.50 
   3  -4   0  132.99    9.60 
   3   4   0  122.99    9.40 
  -3   4   0  139.69    9.60 
  -3   4   0  126.09    9.50 
   3   4   0  123.09    9.50 
  -3   4   0  123.29    9.50 
  -3   4   0  111.29    9.70 
   3   4   0  116.29    9.80 
   3   4   0  133.89    9.60 
   4  -4   0  762.52   54.89 
  -4  -4   0  750.52   54.89 
  -4  -4   0  712.13   55.09 
   4  -4   0  856.61   54.69 
   4  -4   0  757.42   54.89 
  -4  -4   0  749.73   55.09 
   4  -4   0  666.43   54.79 
  -4  -4   0  708.83   54.69 
  -4   4   0  772.02   54.89 
  -4   4   0  797.82   54.89 
   4   4   0  747.63   55.09 
   4   4   0  796.82   54.99 
  -4   4   0  651.73   54.99 
   4   4   0  739.13   54.79 
  -4   4   0  767.72   54.79 
   4   4   0  705.93   54.79 
  -5  -4   0  161.78   12.40 
  -5  -4   0  183.18   12.80 
  -5  -4   0  139.39   12.40 
  -5  -4   0  169.48   13.00 
  -5  -4   0  162.88   12.90 
  -5   4   0  176.78   12.40 
   5   4   0  170.88   12.50 
  -5   4   0  179.88   12.80 
  -5   4   0  145.49   12.60 
  -5   4   0  178.78   12.80 
  -5   4   0  159.18   12.90 
   5   4   0  174.88   12.90 
  -5   4   0  181.18   12.50 
  -6  -4   0    1.00    1.30 
  -6  -4   0    2.20    0.50 
  -6  -4   0    2.70    0.60 
  -6  -4   0    1.90    1.30 
  -6  -4   0    6.00    1.50 
   6   4   0    2.40    0.70 
  -6   4   0    2.50    1.00 
  -6   4   0    1.20    1.30 
  -6   4   0    2.20    1.30 
  -6   4   0    3.40    1.40 
  -7  -4   0  130.59    9.80 
  -7  -4   0  137.19   10.40 
  -7  -4   0  127.89   10.60 
   7   4   0  140.29   10.80 
  -7   4   0  109.39   10.10 
  -7   4   0  146.29   10.50 
   7   4   0  135.39    9.80 
  -7   4   0  133.89   10.60 
  -8  -4   0   15.50    2.40 
  -8  -4   0   19.60    2.90 
  -8  -4   0   19.70    2.50 
  -8   4   0   15.50    2.40 
   8   4   0   18.60    3.00 
  -8   4   0   16.10    2.80 
  -8   4   0   13.30    2.00 
   9  -4   0 1063.39   77.19 
  -9  -4   0 1079.19   77.39 
  -9  -4   0 1145.39   77.39 
  -9  -4   0 1046.50   77.29 
  -9   4   0 1037.60   77.09 
  -9   4   0 1003.90   77.39 
  -9   4   0 1097.79   77.39 
   9   4   0  907.51   77.39 
 -10  -4   0   75.89    6.60 
  10  -4   0   77.29    6.70 
 -10  -4   0   69.09    6.70 
 -10  -4   0   72.59    6.80 
 -10   4   0   74.09    6.80 
 -10   4   0   70.99    6.30 
 -10   4   0   73.89    7.00 
  10   4   0   66.59    7.10 
 -11  -4   0  232.38   18.60 
 -11  -4   0  270.77   18.60 
 -11  -4   0  214.28   18.60 
  11  -4   0  241.08   18.50 
 -11   4   0  243.98   18.70 
 -11   4   0  253.27   18.70 
  11   4   0  225.58   18.90 
  12  -4   0   78.29    7.50 
 -12  -4   0   77.19    7.80 
 -12  -4   0   99.19    7.70 
 -12  -4   0   79.69    7.60 
 -12   4   0   72.59    7.80 
 -12   4   0   99.19    7.50 
  12   4   0   84.49    8.30 
 -12   4   0   79.79    7.70 
  13  -4   0   84.39    9.10 
  13  -4   0   94.29    8.30 
 -13  -4   0   95.19    8.70 
 -13  -4   0  106.99    8.60 
 -13  -4   0   80.69    8.50 
 -13   4   0  114.59    8.30 
 -13   4   0   86.19    8.70 
  13   4   0   99.29    9.30 
 -14  -4   0  281.07   19.70 
 -14  -4   0  234.58   19.60 
 -14  -4   0  229.88   19.60 
  14  -4   0  241.38   19.30 
  14  -4   0  219.18   19.90 
 -14   4   0  229.98   19.70 
 -14   4   0  291.17   19.40 
  14   4   0  279.47   20.10 
  15  -4   0   71.39    8.00 
 -15  -4   0   78.89    7.80 
 -15  -4   0   73.19    8.00 
 -15  -4   0   90.39    7.80 
  15  -4   0   85.79    7.40 
 -15   4   0   90.69    7.20 
 -15   4   0   64.29    8.00 
  15   4   0   74.19    8.50 
 -16  -4   0   10.70    3.10 
  16  -4   0   13.80    3.30 
 -16  -4   0   15.60    3.10 
  16  -4   0   15.80    2.90 
 -16  -4   0   12.10    3.30 
  16   4   0   14.00    3.80 
 -16   4   0   13.30    2.60 
 -16   4   0   10.30    3.30 
 -17  -4   0    3.70    2.40 
 -17  -4   0    2.70    2.60 
 -17  -4   0    4.00    3.00 
  17  -4   0    2.90    2.40 
  17  -4   0    2.70    2.70 
 -17   4   0    4.00    2.10 
  17   4   0    4.60    3.50 
 -17   4   0    2.70    3.00 
 -18  -4   0  177.18   17.40 
 -18  -4   0  249.58   17.20 
  18  -4   0  196.08   17.20 
 -18  -4   0  176.58   17.00 
  18  -4   0  256.27   17.00 
  18   4   0  244.98   18.00 
 -18   4   0  242.28   16.70 
 -18   4   0  184.18   17.40 
 -19  -4   0   15.40    3.70 
  19  -4   0   18.60    4.90 
 -19  -4   0   25.30    3.70 
 -19  -4   0   19.00    3.60 
 -19   4   0   13.40    4.70 
 -19   4   0   28.60    3.00 
  19   4   0   32.80    4.80 
   0  -5   0   -0.20    1.00 
   0  -5   0    0.90    0.60 
   0  -5   0   -0.20    1.20 
   0   5   0    0.20    0.80 
   0   5   0   -0.50    1.00 
  -1  -5   0   41.10    4.00 
  -1  -5   0   45.40    4.20 
   1  -5   0   42.00    3.80 
  -1   5   0   41.10    3.80 
  -1   5   0   44.70    3.70 
   1   5   0   42.70    3.90 
   1   5   0   43.90    3.90 
   1   5   0   39.30    3.70 
   1   5   0   46.60    3.20 
  -1   5   0   36.20    3.90 
   2  -5   0  382.96   26.20 
  -2  -5   0  355.76   26.00 
   2  -5   0  365.16   26.30 
   2  -5   0  343.47   25.90 
  -2  -5   0  357.76   25.90 
  -2  -5   0  339.17   26.40 
  -2  -5   0  342.47   26.40 
  -2   5   0  378.96   26.10 
   2   5   0  337.17   26.10 
   2   5   0  318.07   26.30 
   2   5   0  363.06   25.90 
  -2   5   0  338.17   26.10 
   2   5   0  374.56   26.10 
  -2   5   0  334.17   26.30 
  -3  -5   0  187.88   14.80 
  -3  -5   0  206.98   15.30 
   3  -5   0  199.88   14.90 
   3  -5   0  200.58   15.10 
   3  -5   0  203.08   14.80 
  -3  -5   0  203.78   14.90 
  -3   5   0  181.78   15.10 
   3   5   0  211.58   15.00 
  -3   5   0  199.78   14.80 
   3   5   0  186.28   15.10 
   3   5   0  191.58   14.70 
   3   5   0  184.98   14.90 
  -3   5   0  201.48   14.90 
  -3   5   0  221.58   15.00 
  -4  -5   0   14.10    1.60 
  -4  -5   0   19.80    2.10 
  -4  -5   0    9.20    1.90 
   4  -5   0   14.70    1.60 
   4  -5   0   13.10    1.90 
  -4  -5   0   18.30    2.50 
  -4  -5   0   13.30    1.50 
   4  -5   0   16.90    1.60 
   4   5   0   13.90    1.70 
  -4   5   0   14.70    1.80 
  -4   5   0   17.00    1.90 
  -4   5   0   10.00    1.90 
  -4   5   0   14.90    1.70 
   4   5   0   14.00    2.00 
   4   5   0   17.70    2.50 
   4   5   0   17.00    1.80 
  -5  -5   0  135.69   11.40 
   5  -5   0  157.58   11.80 
  -5  -5   0  150.18   12.00 
  -5  -5   0  165.18   11.80 
  -5  -5   0  140.59   11.40 
  -5  -5   0  160.08   12.20 
  -5   5   0  166.28   11.70 
   5   5   0  153.28   11.50 
  -5   5   0  167.48   11.50 
  -5   5   0  135.59   11.90 
  -5   5   0  168.18   11.80 
   5   5   0  135.59   13.00 
  -6  -5   0    3.40    1.50 
  -6  -5   0    4.00    2.00 
  -6  -5   0    2.30    0.70 
  -6  -5   0    2.60    0.70 
  -6  -5   0    1.80    1.40 
   6   5   0    2.60    0.90 
  -6   5   0    3.10    1.40 
   6   5   0    3.90    1.70 
  -6   5   0    2.40    1.90 
  -6   5   0    4.10    1.50 
  -7  -5   0    6.60    2.00 
  -7  -5   0    5.40    0.80 
  -7  -5   0    8.10    2.50 
  -7  -5   0    5.80    1.80 
  -7   5   0    4.40    1.80 
  -7   5   0    5.00    1.80 
   7   5   0    7.50    1.10 
  -7   5   0    4.80    1.30 
   7   5   0    7.10    2.30 
  -7   5   0    7.30    1.80 
  -8  -5   0  101.49    8.40 
  -8  -5   0  106.29    8.40 
  -8  -5   0  104.59    8.60 
  -8  -5   0   91.59    7.60 
  -8   5   0   94.39    8.00 
  -8   5   0  102.09    8.60 
   8   5   0   96.49    8.80 
  -8   5   0  109.09    8.40 
   8   5   0  106.09    7.60 
  -9  -5   0   49.60    4.90 
  -9  -5   0   47.30    5.10 
   9  -5   0   50.49    5.10 
  -9  -5   0   52.89    5.00 
  -9   5   0   46.60    5.40 
  -9   5   0   47.90    5.00 
  -9   5   0   46.90    4.40 
   9   5   0   36.30    4.80 
  10  -5   0   35.80    4.10 
 -10  -5   0   36.70    4.30 
 -10  -5   0   36.20    4.00 
 -10  -5   0   35.60    4.40 
 -10   5   0   34.10    3.80 
 -10   5   0   40.10    4.20 
 -10   5   0   29.70    4.30 
  10   5   0   36.10    4.50 
 -11  -5   0   55.49    5.80 
  11  -5   0   49.00    5.60 
 -11  -5   0   54.59    5.50 
 -11  -5   0   51.99    5.60 
 -11   5   0   54.69    5.80 
  11   5   0   44.40    5.70 
 -11   5   0   56.59    5.10 
 -11   5   0   55.79    5.90 
 -12  -5   0   -1.20    2.20 
 -12  -5   0    1.80    2.10 
 -12  -5   0    2.80    2.30 
  12  -5   0    2.80    2.20 
 -12   5   0    1.20    1.70 
 -12   5   0    0.20    2.20 
 -12   5   0    1.10    2.30 
  12   5   0    0.00    2.90 
 -13  -5   0    4.40    2.40 
 -13  -5   0   -1.60    2.30 
 -13  -5   0    2.00    2.40 
  13  -5   0    1.80    2.30 
 -13   5   0    1.90    1.80 
  13   5   0    3.10    3.20 
 -13   5   0    3.50    2.40 
 -13   5   0    3.30    2.40 
  14  -5   0  155.88   12.80 
 -14  -5   0  174.88   13.10 
 -14  -5   0  138.09   13.00 
 -14  -5   0  147.39   13.10 
 -14   5   0  169.28   12.50 
  14   5   0  179.78   13.80 
 -14   5   0  145.99   13.10 
 -15  -5   0    1.20    2.70 
  15  -5   0    0.10    3.00 
 -15  -5   0    0.00    2.60 
 -15  -5   0    0.10    2.80 
  15  -5   0    0.70    2.40 
  15   5   0   -1.80    3.20 
 -15   5   0    5.90    2.90 
 -15   5   0    1.20    1.80 
  16  -5   0   -1.50    2.20 
 -16  -5   0    2.80    2.90 
  16  -5   0    0.70    2.70 
 -16  -5   0    0.00    2.50 
 -16  -5   0    0.10    2.60 
 -16   5   0    0.00    1.80 
 -16   5   0    1.80    2.80 
  16   5   0    0.10    3.30 
 -17  -5   0  100.79   10.00 
  17  -5   0  121.69    9.60 
  17  -5   0   96.29    9.90 
 -17  -5   0  117.99    9.80 
 -17  -5   0   97.29    9.80 
  17   5   0  127.49   10.80 
 -17   5   0  116.39    9.00 
 -17   5   0   97.49   10.00 
 -18  -5   0   11.90    3.00 
 -18  -5   0    7.40    3.00 
  18  -5   0    9.50    3.20 
 -18  -5   0    5.60    3.10 
 -18   5   0   14.10    2.30 
  18   5   0   16.40    4.20 
 -18   5   0   13.00    3.30 
 -19  -5   0   10.10    3.20 
 -19  -5   0   11.30    3.50 
  19  -5   0   10.00    3.20 
  19  -5   0   16.80    3.10 
 -19  -5   0   19.30    3.30 
  19   5   0   20.70    4.30 
 -19   5   0   14.50    3.60 
   0  -6   0  966.10   70.49 
   0  -6   0  951.60   70.89 
   0  -6   0  989.60   71.09 
   0   6   0  891.81   70.89 
   0   6   0 1015.90   70.69 
  -1  -6   0  484.15   34.90 
   1  -6   0  502.05   35.20 
   1  -6   0  497.15   35.40 
  -1  -6   0  475.05   35.30 
   1  -6   0  472.45   34.70 
  -1  -6   0  492.65   35.40 
   1   6   0  502.75   35.00 
  -1   6   0  456.95   35.10 
  -1   6   0  499.15   35.00 
  -1   6   0  429.86   35.20 
   1   6   0  446.26   35.10 
   1   6   0  427.76   35.10 
   2  -6   0  139.69   11.00 
  -2  -6   0  134.89   11.10 
  -2  -6   0  138.89   10.40 
   2  -6   0  135.79   10.70 
  -2  -6   0  141.39   11.10 
   2   6   0  115.69   10.80 
  -2   6   0  130.59   10.70 
   2   6   0  139.39   10.80 
   2   6   0  163.98   10.40 
  -2   6   0  146.99   10.70 
   3  -6   0  143.79   11.60 
   3  -6   0  148.19   11.20 
  -3  -6   0  141.29   11.80 
  -3  -6   0  149.88   11.20 
  -3  -6   0  139.29   11.80 
  -3  -6   0  143.29   11.20 
  -3   6   0  136.39   11.70 
   3   6   0  146.19   11.40 
  -3   6   0  158.18   11.20 
  -3   6   0  161.88   11.40 
  -3   6   0  154.08   11.40 
   3   6   0  156.38   11.50 
   3   6   0  170.68   11.20 
   3   6   0  130.99   11.60 
  -4  -6   0  111.69    9.40 
   4  -6   0  118.39    8.80 
  -4  -6   0  106.59    8.90 
  -4  -6   0  106.09    9.30 
   4  -6   0  112.39    8.70 
  -4  -6   0  115.49    8.90 
   4  -6   0  115.59    9.20 
  -4   6   0  121.19    9.00 
  -4   6   0  108.69    9.30 
  -4   6   0  119.79    8.80 
  -4   6   0  112.69    8.80 
   4   6   0  117.69    9.10 
   4   6   0  130.99    8.90 
   4   6   0  106.89    8.90 
  -5  -6   0   80.99    6.80 
  -5  -6   0   68.69    5.90 
   5  -6   0   67.99    6.30 
  -5  -6   0   77.29    6.60 
  -5  -6   0   75.09    6.10 
  -5   6   0   74.39    6.60 
   5   6   0   71.89    6.00 
  -5   6   0   77.99    6.30 
  -5   6   0   79.59    6.10 
  -5   6   0   75.29    5.90 
  -6  -6   0    3.40    1.70 
  -6  -6   0    1.90    0.80 
   6  -6   0    1.20    1.40 
  -6  -6   0    3.20    0.80 
  -6  -6   0    2.90    1.50 
  -6  -6   0    1.90    1.90 
  -6   6   0    1.70    0.90 
   6   6   0    1.00    1.80 
   6   6   0    2.10    1.10 
  -6   6   0    2.00    1.30 
  -6   6   0    4.20    1.60 
  -6   6   0    5.80    1.80 
  -7  -6   0  163.48   14.10 
  -7  -6   0  187.48   14.80 
   7  -6   0  185.58   14.60 
  -7   6   0  219.18   14.70 
   7   6   0  190.18   14.20 
  -7   6   0  200.78   14.80 
   7   6   0  203.78   15.00 
  -7   6   0  183.48   14.90 
  -8  -6   0   27.70    3.40 
  -8  -6   0   26.60    3.60 
  -8  -6   0   23.30    2.30 
  -8  -6   0   29.90    3.30 
   8  -6   0   31.70    3.70 
  -8  -6   0   25.70    2.40 
  -8   6   0   34.40    3.70 
   8   6   0   25.20    3.70 
   8   6   0   29.70    2.60 
  -8   6   0   29.30    3.50 
  -9  -6   0 1384.16   98.99 
  -9  -6   0 1302.07   98.79 
  -9  -6   0 1346.97   99.09 
   9  -6   0 1323.07   98.89 
   9   6   0 1356.66   98.19 
  -9   6   0 1287.07   98.89 
  -9   6   0 1436.66   98.89 
   9   6   0 1302.77   98.99 
 -10  -6   0   37.30    4.40 
 -10  -6   0   34.10    4.30 
  10  -6   0   37.10    4.20 
 -10  -6   0   38.90    4.50 
 -10   6   0   24.90    3.90 
 -10   6   0   41.40    4.50 
  10   6   0   36.10    4.50 
  11  -6   0  655.43   47.90 
 -11  -6   0  639.54   47.90 
 -11  -6   0  631.94   48.10 
 -11  -6   0  689.23   48.00 
  11   6   0  576.74   48.10 
 -11   6   0  611.34   48.10 
 -11   6   0  690.63   48.00 
 -12  -6   0    2.10    2.30 
 -12  -6   0    3.20    2.40 
 -12  -6   0    3.40    2.30 
  12  -6   0    4.00    2.50 
 -12   6   0    1.60    2.20 
  12   6   0    0.80    3.10 
 -12   6   0    0.70    2.30 
  13  -6   0  448.06   33.50 
 -13  -6   0  431.76   33.60 
 -13  -6   0  485.35   33.70 
 -13   6   0  426.36   33.60 
 -13   6   0  434.46   33.60 
  13   6   0  412.46   33.90 
 -13   6   0  464.05   33.10 
  14  -6   0  133.49   11.20 
 -14  -6   0  133.09   11.50 
 -14  -6   0  128.39   11.30 
  14   6   0  133.69   12.00 
 -14   6   0  137.69   11.30 
 -14   6   0  125.29   11.20 
 -15  -6   0  138.29   11.10 
  15  -6   0  133.29   10.90 
 -15  -6   0  125.29   11.10 
 -15  -6   0  122.39   11.20 
  15   6   0  129.49   11.90 
 -15   6   0  119.09   11.10 
  16  -6   0   11.40    3.60 
 -16  -6   0   15.30    3.30 
 -16  -6   0    8.90    3.10 
 -16  -6   0    7.30    3.00 
 -16   6   0    8.00    3.20 
  16   6   0   14.50    4.00 
  17  -6   0   17.70    3.30 
  17  -6   0    8.10    3.40 
 -17  -6   0   21.30    3.80 
 -17  -6   0   18.40    3.70 
 -17  -6   0   21.60    3.60 
 -17   6   0   14.20    3.50 
  17   6   0   17.10    4.40 
  18  -6   0   97.09    8.70 
 -18  -6   0  106.99   11.60 
  18  -6   0  118.49    9.10 
 -18  -6   0   84.29    9.30 
  18  -6   0   88.09    9.30 
 -18  -6   0  106.99    9.20 
  18   6   0  117.29   12.80 
 -18   6   0   82.99    9.20 
   0  -7   0    0.80    1.90 
   0  -7   0    2.20    1.40 
   0  -7   0   -1.50    0.80 
   0   7   0    0.30    1.40 
   0   7   0    0.20    1.30 
  -1  -7   0   12.50    1.40 
  -1  -7   0   10.70    2.10 
   1  -7   0   10.40    1.20 
  -1  -7   0    8.30    2.10 
   1  -7   0   12.20    2.40 
   1  -7   0    9.60    1.90 
   1   7   0   16.70    3.20 
  -1   7   0   12.00    2.20 
   1   7   0   10.10    1.90 
  -1   7   0   13.90    1.80 
  -1   7   0    7.70    1.70 
   1   7   0   14.80    2.10 
   2  -7   0  784.82   54.29 
  -2  -7   0  734.73   54.49 
  -2  -7   0  754.12   53.99 
   2  -7   0  763.32   54.49 
  -2  -7   0  729.43   54.59 
  -2   7   0  738.23   54.49 
   2   7   0  688.93   54.29 
   2   7   0  668.53   54.29 
  -2   7   0  716.43   54.19 
   2   7   0  729.93   53.79 
   2   7   0  744.03   54.19 
  -2   7   0  694.53   54.39 
   2   7   0  805.72   53.79 
  -3  -7   0  274.77   20.50 
  -3  -7   0  258.77   20.50 
   3  -7   0  274.37   20.40 
  -3  -7   0  276.87   19.90 
   3  -7   0  245.28   19.70 
  -3  -7   0  264.67   19.90 
   3   7   0  262.47   20.20 
   3   7   0  243.38   20.30 
  -3   7   0  266.97   20.40 
  -3   7   0  296.47   19.80 
  -3   7   0  271.77   20.10 
   3   7   0  265.57   20.10 
  -3   7   0  281.87   20.10 
   4  -7   0  108.49    9.00 
  -4  -7   0  110.39    8.50 
  -4  -7   0  104.89    8.40 
  -4  -7   0  102.69    9.10 
  -4  -7   0  116.19    9.30 
   4  -7   0  103.19    8.50 
   4  -7   0  111.79    8.40 
   4   7   0  114.59    8.90 
  -4   7   0  112.39    9.10 
  -4   7   0  114.59    8.80 
  -4   7   0  113.09    8.40 
   4   7   0  108.69    8.70 
  -4   7   0  115.09    8.60 
  -5  -7   0    8.30    2.30 
  -5  -7   0    9.50    1.70 
  -5  -7   0    4.40    1.90 
  -5  -7   0    9.40    1.30 
   5  -7   0    9.10    2.10 
   5   7   0    8.10    1.60 
  -5   7   0   10.00    2.30 
  -5   7   0   10.40    1.50 
  -5   7   0   12.50    2.00 
   5   7   0   10.40    2.00 
  -5   7   0    8.90    1.50 
  -6  -7   0  123.19    9.90 
   6  -7   0  115.89    9.70 
  -6  -7   0  116.89    9.10 
  -6  -7   0  121.39   10.10 
  -6  -7   0  119.09    9.50 
   6   7   0  115.69    9.80 
  -6   7   0  124.19    9.20 
  -6   7   0  123.69    9.60 
  -6   7   0  125.49    9.40 
   6   7   0  115.49    9.30 
  -6   7   0  117.19    9.90 
  -7  -7   0   36.10    4.20 
  -7  -7   0   32.20    3.10 
  -7  -7   0   35.20    4.40 
  -7   7   0   37.80    4.20 
   7   7   0   36.90    3.40 
  -7   7   0   39.70    3.80 
   7   7   0   37.60    4.10 
  -7   7   0   39.20    4.20 
  -7   7   0   34.40    3.10 
   8  -7   0   33.50    3.90 
  -8  -7   0   34.70    3.50 
  -8  -7   0   28.40    3.50 
  -8  -7   0   30.70    3.90 
  -8  -7   0   26.80    2.70 
  -8  -7   0   28.10    2.60 
   8   7   0   31.00    2.90 
  -8   7   0   32.60    3.70 
   8   7   0   28.80    3.60 
  -8   7   0   30.80    3.60 
  -9  -7   0   82.39    7.10 
   9  -7   0   94.99    7.90 
  -9  -7   0   97.19    8.50 
  -9  -7   0  100.29    8.00 
   9  -7   0  101.79    8.40 
  -9  -7   0   88.59    8.10 
  -9   7   0  101.99    8.00 
   9   7   0   96.19    7.10 
   9   7   0   91.59    8.60 
  -9   7   0   84.79    8.20 
 -10  -7   0  433.26   34.00 
  10  -7   0  446.06   33.60 
  10  -7   0  472.85   33.90 
 -10  -7   0  448.46   33.80 
 -10  -7   0  461.75   33.70 
  10   7   0  432.46   34.10 
 -10   7   0  410.86   33.90 
 -10   7   0  487.65   33.70 
  11  -7   0   93.09    8.40 
 -11  -7   0   98.79    8.20 
  11  -7   0   87.09    7.90 
 -11  -7   0   90.39    8.50 
 -11  -7   0   88.89    8.10 
 -11   7   0   98.19    8.10 
  11   7   0   84.19    8.80 
 -11   7   0   82.89    8.50 
 -12  -7   0   32.50    4.00 
  12  -7   0   29.40    3.60 
 -12  -7   0   31.10    3.90 
 -12  -7   0   26.10    4.00 
  12  -7   0   26.60    3.90 
 -12   7   0   20.30    3.90 
  12   7   0   28.30    4.50 
 -12   7   0   31.10    3.90 
  13  -7   0    0.30    2.10 
 -13  -7   0   -0.20    2.50 
 -13  -7   0    0.40    2.70 
  13  -7   0    0.70    2.60 
  13   7   0    0.70    3.00 
 -13   7   0    1.80    2.40 
 -13   7   0    2.20    2.60 
 -14  -7   0   54.99    6.10 
 -14  -7   0   56.39    6.10 
  14  -7   0   51.39    5.90 
 -14  -7   0   46.90    5.60 
  14  -7   0   46.00    5.50 
 -14   7   0   48.00    5.90 
 -14   7   0   52.79    6.20 
  14   7   0   55.99    6.20 
 -15  -7   0    5.60    3.00 
 -15  -7   0    5.50    2.80 
  15  -7   0    7.90    2.50 
  15  -7   0    6.50    2.90 
 -15  -7   0    3.60    2.80 
 -15   7   0    2.70    2.70 
  15   7   0   -3.00    3.50 
 -16  -7   0   24.30    3.70 
 -16  -7   0   15.70    3.40 
  16  -7   0   16.20    3.00 
 -16  -7   0   15.80    3.60 
  16  -7   0   19.50    4.10 
  16  -7   0   20.60    3.60 
  16   7   0   15.70    4.20 
 -16   7   0   13.50    3.30 
 -17  -7   0   13.60    3.60 
  17  -7   0   11.00    3.80 
  17  -7   0   18.40    2.90 
  17  -7   0   19.60    3.50 
 -17  -7   0   15.20    3.50 
 -17  -7   0   15.00    3.40 
 -17   7   0   17.70    3.50 
  17   7   0   13.60    4.30 
 -18  -7   0    2.10    2.90 
  18  -7   0    5.60    2.90 
  18  -7   0    0.40    4.30 
 -18  -7   0    8.40    4.70 
 -18  -7   0    9.00    3.10 
  18   7   0    2.90    3.90 
 -18   7   0   10.80    3.20 
   0  -8   0  404.16   30.20 
   0  -8   0  409.66   29.70 
   0  -8   0  412.06   30.40 
   0   8   0  421.46   29.90 
   0   8   0  364.06   30.10 
  -1  -8   0  817.62   60.59 
  -1  -8   0  846.62   60.09 
   1  -8   0  843.72   60.49 
   1  -8   0  814.42   59.99 
  -1  -8   0  845.42   60.79 
   1  -8   0  822.12   60.69 
  -1   8   0  774.02   60.49 
   1   8   0  858.91   60.29 
   1   8   0  773.82   60.49 
   1   8   0  775.82   60.39 
  -1   8   0  851.71   60.29 
  -1   8   0  798.92   60.39 
   2  -8   0   65.29    6.40 
   2  -8   0   61.79    5.00 
  -2  -8   0   70.89    5.40 
  -2  -8   0   67.09    6.20 
   2  -8   0   63.69    5.60 
  -2   8   0   67.09    6.20 
   2   8   0   69.39    6.00 
   2   8   0   71.89    5.80 
   2   8   0   62.09    6.30 
  -2   8   0   69.09    5.70 
  -2   8   0   62.19    5.70 
  -3  -8   0  280.47   20.10 
  -3  -8   0  273.57   20.00 
   3  -8   0  267.77   20.30 
  -3  -8   0  271.87   20.90 
   3  -8   0  272.17   20.80 
  -3  -8   0  266.87   20.80 
  -3   8   0  277.87   20.40 
  -3   8   0  271.17   20.70 
  -3   8   0  285.47   20.40 
   3   8   0  274.17   20.40 
   3   8   0  256.87   20.40 
   3   8   0  246.08   20.60 
  -4  -8   0  202.38   15.80 
   4  -8   0  192.08   15.10 
   4  -8   0  176.98   14.90 
  -4  -8   0  194.18   15.80 
  -4  -8   0  204.38   15.00 
   4  -8   0  207.98   15.70 
  -4  -8   0  210.38   15.10 
  -4   8   0  199.98   15.20 
  -4   8   0  199.68   15.30 
   4   8   0  202.18   15.40 
  -4   8   0  218.08   14.90 
   4   8   0  196.78   15.30 
  -4   8   0  208.88   15.70 
  -5  -8   0  168.38   12.90 
  -5  -8   0  159.68   12.10 
   5  -8   0  145.59   12.70 
  -5  -8   0  169.08   13.10 
  -5  -8   0  155.58   12.20 
  -5   8   0  162.88   12.20 
  -5   8   0  171.98   12.10 
   5   8   0  155.48   12.40 
   5   8   0  155.88   12.60 
  -5   8   0  156.58   12.80 
  -5   8   0  160.48   12.50 
  -6  -8   0   57.29    4.80 
  -6  -8   0   54.99    5.90 
   6  -8   0   58.99    5.70 
  -6  -8   0   54.89    6.10 
  -6  -8   0   60.49    5.20 
  -6   8   0   62.99    6.00 
  -6   8   0   51.39    5.40 
  -6   8   0   64.59    5.10 
   6   8   0   57.79    5.10 
   6   8   0   59.39    5.80 
  -6   8   0   59.09    4.90 
  -7  -8   0  425.76   31.00 
  -7  -8   0  399.36   30.30 
   7  -8   0  398.56   30.80 
  -7  -8   0  423.36   31.20 
   7   8   0  430.06   31.00 
  -7   8   0  403.76   30.70 
  -7   8   0  387.86   30.30 
  -7   8   0  446.56   30.60 
  -7   8   0  387.36   30.90 
   7   8   0  408.16   30.40 
  -8  -8   0   64.79    6.60 
   8  -8   0   61.39    6.00 
  -8  -8   0   55.59    4.90 
  -8  -8   0   64.39    5.80 
  -8  -8   0   55.49    6.10 
   8   8   0   55.49    6.40 
  -8   8   0   60.49    6.10 
  -8   8   0   65.39    6.40 
   8   8   0   66.09    5.20 
  -8   8   0   67.79    5.60 
  -9  -8   0 1401.26  105.99 
  -9  -8   0 1451.95  105.89 
   9  -8   0 1365.76  105.69 
  -9  -8   0 1443.96  105.59 
   9   8   0 1442.76  105.89 
  -9   8   0 1339.67  105.59 
  -9   8   0 1567.54  105.59 
   9   8   0 1474.55  105.19 
  10  -8   0  318.17   24.10 
  10  -8   0  305.27   23.80 
 -10  -8   0  300.37   23.10 
 -10  -8   0  313.57   24.00 
 -10  -8   0  320.47   23.80 
 -10  -8   0  315.97   24.30 
 -10   8   0  343.27   23.80 
  10   8   0  312.87   24.30 
 -10   8   0  287.07   24.00 
  11  -8   0  529.75   38.60 
 -11  -8   0  504.55   38.60 
 -11  -8   0  516.45   38.40 
  11  -8   0  491.35   38.30 
 -11  -8   0  538.15   38.90 
 -11   8   0  536.55   38.40 
  11   8   0  498.05   38.90 
 -11   8   0  489.65   38.60 
 -12  -8   0  132.89   11.00 
  12  -8   0  130.49   11.10 
 -12  -8   0  132.99   10.80 
 -12  -8   0  128.09   11.30 
  12  -8   0  120.19   10.60 
 -12   8   0  137.79   10.70 
 -12   8   0  120.59   11.30 
  12   8   0  119.69   11.50 
 -13  -8   0  193.18   16.40 
 -13  -8   0  207.08   16.00 
  13  -8   0  217.48   16.30 
 -13  -8   0  213.18   16.20 
  13  -8   0  191.18   15.80 
  13   8   0  184.28   16.70 
 -13   8   0  208.28   16.00 
 -13   8   0  193.78   16.40 
  14  -8   0  224.38   17.30 
  14  -8   0  201.28   17.00 
 -14  -8   0  216.38   17.60 
 -14  -8   0  233.38   17.30 
 -14  -8   0  233.98   17.40 
  14   8   0  212.98   18.00 
 -14   8   0  212.68   17.50 
 -14   8   0  205.58   17.10 
 -15  -8   0   15.80    3.30 
  15  -8   0   17.80    3.70 
  15  -8   0   19.50    3.20 
 -15  -8   0   22.30    3.70 
 -15  -8   0   17.30    3.70 
 -15   8   0   21.10    3.40 
  15   8   0   18.50    4.50 
 -15   8   0   17.50    3.60 
  16  -8   0   33.60    3.90 
 -16  -8   0   36.20    4.70 
 -16  -8   0   28.00    4.10 
  16  -8   0   32.80    4.40 
 -16  -8   0   33.40    4.50 
 -16   8   0   28.40    4.20 
  16   8   0   33.50    5.50 
 -17  -8   0    7.00    3.10 
 -17  -8   0    6.40    3.30 
  17  -8   0    8.20    2.60 
  17  -8   0   12.60    3.30 
 -17  -8   0    9.30    3.20 
  17  -8   0   12.80    4.00 
  17   8   0    5.70    6.00 
 -17   8   0    9.80    3.00 
   0  -9   0    0.90    2.10 
   0  -9   0    1.00    1.70 
   0   9   0    2.40    1.90 
   0   9   0    0.10    1.40 
  -1  -9   0   40.60    4.70 
   1  -9   0   44.80    4.40 
  -1  -9   0   47.20    3.90 
  -1  -9   0   49.00    5.30 
   1  -9   0   41.50    5.30 
  -1   9   0   41.90    4.80 
  -1   9   0   44.60    4.40 
   1   9   0   42.90    4.50 
  -1   9   0   44.30    4.30 
   1   9   0   45.80    4.30 
   1   9   0   41.80    4.60 
  -2  -9   0  145.89   12.20 
   2  -9   0  154.98   12.40 
   2  -9   0  149.99   11.80 
   2  -9   0  145.29   11.30 
  -2  -9   0  148.59   11.50 
  -2   9   0  156.78   11.80 
   2   9   0  163.28   11.80 
  -2   9   0  153.98   11.80 
   2   9   0  150.58   12.00 
  -2   9   0  146.89   12.10 
   2   9   0  144.99   12.00 
  -3  -9   0  334.17   24.60 
   3  -9   0  300.37   23.60 
   3  -9   0  312.27   24.60 
   3  -9   0  314.27   24.00 
  -3  -9   0  322.17   24.60 
  -3  -9   0  334.47   23.90 
  -3   9   0  335.77   24.10 
  -3   9   0  316.47   24.40 
   3   9   0  316.37   24.20 
   3   9   0  333.77   24.20 
  -3   9   0  340.77   24.10 
   3   9   0  297.77   24.30 
   4  -9   0   23.40    3.50 
  -4  -9   0   29.00    3.70 
  -4  -9   0   27.80    3.60 
  -4  -9   0   27.30    2.50 
  -4  -9   0   26.60    2.80 
   4   9   0   25.60    3.00 
   4   9   0   25.00    3.00 
   4   9   0   27.30    2.50 
  -4   9   0   28.40    3.20 
  -4   9   0   26.70    3.10 
  -4   9   0   20.80    3.30 
  -5  -9   0    6.20    2.20 
   5  -9   0    8.30    1.20 
  -5  -9   0    9.70    2.60 
   5  -9   0   10.30    2.50 
  -5  -9   0    7.90    1.50 
  -5  -9   0    7.10    1.50 
  -5   9   0    9.90    1.70 
   5   9   0    9.40    1.90 
   5   9   0    8.50    2.20 
  -5   9   0    6.10    2.40 
  -5   9   0    7.40    2.00 
  -5   9   0   11.40    1.30 
  -6  -9   0   42.80    4.00 
   6  -9   0   42.90    4.80 
  -6  -9   0   42.00    3.60 
  -6  -9   0   31.50    4.20 
  -6  -9   0   35.00    4.80 
  -6   9   0   40.30    4.50 
   6   9   0   47.90    4.90 
  -6   9   0   38.00    3.70 
   6   9   0   40.10    4.30 
  -6   9   0   43.40    5.10 
  -6   9   0   43.70    3.80 
   7  -9   0    6.60    2.30 
  -7  -9   0    6.70    1.30 
  -7  -9   0    5.20    2.30 
  -7  -9   0   10.30    2.80 
  -7   9   0    5.50    2.60 
   7   9   0    4.30    2.30 
  -7   9   0    4.80    2.10 
  -7   9   0    5.80    1.30 
   7   9   0    7.30    1.60 
  -7   9   0    6.20    1.60 
  -8  -9   0  109.79    9.20 
  -8  -9   0  111.59    9.70 
  -8  -9   0  113.79    8.70 
   8  -9   0  102.49    9.00 
  -8  -9   0   98.29    8.10 
  -8   9   0  110.59    9.40 
  -8   9   0  102.39    9.00 
   8   9   0  106.99    8.30 
   8   9   0   98.19    9.30 
  -9  -9   0   27.40    4.20 
   9  -9   0   27.90    3.70 
  -9  -9   0   25.60    2.60 
  -9  -9   0   29.00    3.50 
  -9  -9   0   27.80    3.80 
  -9   9   0   28.60    3.80 
   9   9   0   30.50    4.20 
   9   9   0   31.90    3.00 
  -9   9   0   29.70    3.20 
  10  -9   0    3.50    2.20 
 -10  -9   0    3.30    2.80 
 -10  -9   0    1.90    2.60 
  10  -9   0    2.20    2.60 
 -10  -9   0    3.50    2.00 
 -10   9   0    3.00    1.80 
  10   9   0    0.70    2.80 
 -10   9   0    4.30    2.40 
  10   9   0    3.10    1.10 
 -11  -9   0   39.80    4.90 
  11  -9   0   41.30    5.40 
  11  -9   0   43.70    5.10 
 -11  -9   0   40.60    4.90 
 -11  -9   0   47.60    5.40 
 -11   9   0   33.80    4.70 
  11   9   0   39.20    5.40 
 -11   9   0   39.00    4.60 
 -12  -9   0   47.90    5.70 
 -12  -9   0   49.00    5.40 
 -12  -9   0   48.40    6.00 
  12  -9   0   41.80    5.30 
  12  -9   0   46.80    5.40 
 -12   9   0   45.40    5.10 
 -12   9   0   49.20    5.60 
  12   9   0   39.00    5.40 
  13  -9   0   32.20    4.30 
  13  -9   0   34.40    4.00 
 -13  -9   0   28.80    3.90 
 -13  -9   0   32.80    4.60 
 -13  -9   0   28.80    4.20 
 -13   9   0   28.10    4.40 
  13   9   0   22.80    4.70 
 -13   9   0   29.90    3.80 
  14  -9   0  121.99   10.70 
 -14  -9   0  132.39   11.50 
 -14  -9   0  140.39   11.30 
  14  -9   0  140.49   11.30 
 -14  -9   0  125.99   10.90 
 -14   9   0  119.09   11.40 
 -14   9   0  125.59   10.80 
  14   9   0  121.59   12.10 
 -15  -9   0    5.00    3.00 
 -15  -9   0    7.90    3.30 
  15  -9   0    9.20    2.50 
  15  -9   0    5.40    3.10 
 -15  -9   0    2.70    2.70 
 -15   9   0    5.50    2.60 
 -15   9   0    4.00    2.90 
  15   9   0    1.40    3.70 
 -16  -9   0    4.60    3.20 
 -16  -9   0    5.80    3.20 
  16  -9   0    7.20    2.50 
  16  -9   0    6.60    3.10 
 -16  -9   0    5.70    2.80 
  16   9   0    8.70    4.20 
 -16   9   0    5.00    3.00 
 -16   9   0    6.30    2.60 
 -17  -9   0    8.00    3.00 
 -17  -9   0    7.30    3.30 
  17  -9   0    6.00    3.20 
 -17   9   0    3.10    2.60 
  17   9   0    5.50    4.30 
   0 -10   0    8.40    1.50 
   0 -10   0    8.20    2.00 
   0 -10   0    7.60    2.50 
   0  10   0    7.20    2.20 
   0  10   0   11.00    1.80 
   1 -10   0   11.00    1.60 
   1 -10   0   12.50    3.00 
   1 -10   0   14.40    2.40 
  -1 -10   0   11.20    2.50 
  -1 -10   0   11.60    2.90 
  -1 -10   0   11.30    1.70 
   1  10   0   12.10    2.40 
  -1  10   0   12.40    2.40 
   1  10   0    9.40    2.00 
  -1  10   0   12.40    2.10 
   1  10   0    9.70    2.10 
  -1  10   0    9.80    2.10 
  -2 -10   0   61.79    5.00 
  -2 -10   0   56.49    5.90 
  -2 -10   0   60.89    6.30 
   2 -10   0   57.89    4.80 
   2 -10   0   55.99    5.20 
   2 -10   0   63.99    6.40 
   2  10   0   49.50    5.60 
  -2  10   0   62.29    5.40 
  -2  10   0   61.09    5.40 
   2  10   0   57.19    5.60 
  -2  10   0   55.89    5.90 
   2  10   0   57.59    5.40 
  -3 -10   0  141.49   10.30 
   3 -10   0  126.19   11.20 
   3 -10   0  117.49   10.00 
  -3 -10   0  147.59   11.40 
   3 -10   0  133.89   10.50 
  -3 -10   0  132.19   11.20 
   3  10   0  129.89   10.60 
  -3  10   0  144.59   10.60 
  -3  10   0  130.89   11.10 
  -3  10   0  133.39   10.60 
   3  10   0  129.79   10.90 
   3  10   0  136.89   10.70 
  -4 -10   0    0.10    1.20 
  -4 -10   0    2.40    2.20 
  -4 -10   0    2.30    2.30 
   4 -10   0    2.20    2.30 
  -4  10   0    2.20    2.20 
   4  10   0    3.40    0.80 
   4  10   0    3.70    1.90 
  -4  10   0    4.20    1.60 
  -4  10   0    0.90    1.80 
   4  10   0    3.20    1.80 
   4  10   0    2.20    0.70 
  -5 -10   0   63.59    5.40 
  -5 -10   0   75.79    6.70 
   5 -10   0   61.19    6.60 
  -5 -10   0   61.89    6.80 
  -5 -10   0   65.09    5.30 
  -5  10   0   66.69    5.70 
  -5  10   0   65.59    6.60 
  -5  10   0   63.29    6.10 
   5  10   0   66.89    5.90 
   5  10   0   70.19    6.30 
  -6 -10   0   46.70    5.40 
   6 -10   0   47.00    5.50 
  -6 -10   0   42.40    4.20 
  -6 -10   0   50.99    4.10 
  -6 -10   0   39.70    5.10 
   6  10   0   50.89    5.20 
  -6  10   0   48.60    5.50 
  -6  10   0   45.00    5.00 
  -6  10   0   47.00    4.30 
   6  10   0   45.30    4.50 
  -6  10   0   46.70    3.90 
  -7 -10   0  206.28   17.00 
   7 -10   0  203.58   16.60 
  -7 -10   0  227.48   16.80 
  -7 -10   0  211.98   15.80 
   7  10   0  213.58   16.00 
  -7  10   0  208.68   16.40 
  -7  10   0  207.28   15.80 
  -7  10   0  225.88   16.80 
  -7  10   0  204.58   15.90 
   7  10   0  204.38   16.60 
   8 -10   0  114.69    9.40 
  -8 -10   0  109.89    9.40 
  -8 -10   0  107.39    8.70 
  -8 -10   0  108.79    9.80 
  -8 -10   0  104.89    8.20 
  -8  10   0   91.49    9.10 
   8  10   0  114.79    9.60 
  -8  10   0  105.09    8.40 
  -9 -10   0  743.73   57.09 
  -9 -10   0  817.12   57.99 
  -9 -10   0  790.02   57.59 
   9 -10   0  753.92   57.89 
  -9 -10   0  781.12   58.29 
  -9  10   0  730.63   57.79 
   9  10   0  790.52   57.99 
   9  10   0  827.22   57.29 
  -9  10   0  775.62   57.39 
 -10 -10   0  265.97   21.50 
 -10 -10   0  303.27   22.60 
  10 -10   0  288.67   22.50 
 -10 -10   0  297.27   22.90 
  10 -10   0  289.37   22.70 
 -10 -10   0  310.77   22.20 
 -10  10   0  298.77   22.00 
 -10  10   0  281.27   22.50 
  10  10   0  300.07   22.90 
 -11 -10   0  581.64   41.70 
 -11 -10   0  596.44   42.10 
 -11 -10   0  562.44   42.30 
  11 -10   0  542.55   41.80 
  11 -10   0  560.14   42.00 
 -11  10   0  506.65   41.90 
 -11  10   0  556.84   41.50 
  11  10   0  563.34   42.30 
 -12 -10   0  279.47   20.40 
 -12 -10   0  253.37   21.00 
  12 -10   0  260.87   20.50 
  12 -10   0  273.37   20.80 
 -12 -10   0  290.17   20.80 
 -12  10   0  265.47   20.20 
 -12  10   0  232.28   20.70 
  12  10   0  250.97   21.10 
 -13 -10   0  329.77   25.50 
  13 -10   0  313.67   24.90 
 -13 -10   0  334.87   25.20 
 -13 -10   0  341.87   24.90 
  13 -10   0  344.47   25.20 
 -13  10   0  330.47   24.70 
  13  10   0  301.27   25.60 
 -13  10   0  302.87   25.40 
  14 -10   0  129.19   11.60 
 -14 -10   0  143.09   12.10 
 -14 -10   0  148.19   12.40 
  14 -10   0  153.78   12.20 
 -14 -10   0  144.19   11.70 
 -14  10   0  134.59   11.40 
 -14  10   0  133.79   12.30 
  14  10   0  131.39   12.90 
 -15 -10   0   16.10    4.00 
  15 -10   0   13.70    3.00 
 -15 -10   0   16.80    3.70 
  15 -10   0   22.60    3.80 
 -15 -10   0   16.50    3.20 
 -15  10   0   16.00    3.00 
 -15  10   0    8.10    3.50 
  15  10   0   17.60    4.60 
  16 -10   0    5.70    3.10 
 -16 -10   0    3.30    2.70 
 -16 -10   0    6.30    3.20 
  16 -10   0    3.90    2.50 
 -16 -10   0    1.10    3.10 
  16  10   0   11.30    4.40 
 -16  10   0    5.60    3.00 
 -16  10   0    3.20    2.40 
   0 -11   0    0.90    1.20 
   0 -11   0    0.40    2.40 
   0 -11   0    0.30    1.60 
   0  11   0    0.50    1.60 
   0  11   0   -0.60    1.90 
  -1 -11   0  134.69   11.40 
   1 -11   0  120.99   10.70 
   1 -11   0  130.69   11.40 
  -1 -11   0  132.89   10.30 
  -1 -11   0  136.49   11.20 
   1 -11   0  132.69   10.20 
  -1  11   0  135.49   10.80 
   1  11   0  133.59   10.90 
   1  11   0  134.99   10.90 
  -1  11   0  124.39   11.00 
   1  11   0  137.39   10.60 
  -1  11   0  145.89   10.70 
  -2 -11   0   75.59    6.10 
   2 -11   0   69.79    5.90 
  -2 -11   0   68.29    7.00 
  -2 -11   0   74.69    7.40 
   2 -11   0   73.39    7.40 
   2 -11   0   74.29    6.40 
   2  11   0   69.39    6.50 
   2  11   0   73.09    6.70 
   2  11   0   74.29    6.70 
  -2  11   0   78.19    6.50 
  -2  11   0   78.79    6.50 
  -2  11   0   71.29    7.00 
  -3 -11   0  308.87   22.40 
  -3 -11   0  298.07   23.30 
  -3 -11   0  314.37   23.40 
   3 -11   0  282.67   22.30 
   3 -11   0  281.47   22.60 
   3 -11   0  302.07   23.30 
   3  11   0  305.77   22.90 
   3  11   0  299.37   23.00 
  -3  11   0  297.87   22.70 
   3  11   0  296.97   22.70 
  -3  11   0  321.27   22.80 
  -3  11   0  306.67   23.10 
   4 -11   0   45.10    4.10 
  -4 -11   0   58.39    4.60 
  -4 -11   0   54.19    5.90 
   4 -11   0   49.10    6.00 
  -4 -11   0   49.80    6.00 
  -4  11   0   54.69    5.00 
  -4  11   0   56.59    5.90 
   4  11   0   54.09    5.20 
   4  11   0   47.10    5.20 
  -4  11   0   46.30    5.20 
  -5 -11   0   -0.20    2.20 
  -5 -11   0    3.70    2.50 
  -5 -11   0    1.40    1.30 
   5 -11   0    0.60    2.40 
   5 -11   0    1.40    0.70 
   5  11   0    1.10    1.70 
   5  11   0    1.50    0.70 
  -5  11   0    0.30    1.90 
   5  11   0    1.80    2.00 
  -5  11   0    0.60    1.50 
   5  11   0    1.50    0.80 
  -5  11   0    0.70    2.40 
   6 -11   0   86.19    8.20 
  -6 -11   0   98.29    8.20 
  -6 -11   0   86.89    6.90 
  -6  11   0   83.59    8.10 
   6  11   0   79.79    7.80 
   6  11   0   89.49    7.30 
  -6  11   0   86.89    7.20 
  -6  11   0   77.39    7.60 
  -7 -11   0   35.60    3.70 
  -7 -11   0   42.60    3.60 
  -7 -11   0   37.20    4.50 
  -7 -11   0   33.60    4.70 
   7 -11   0   41.20    4.70 
   7  11   0   35.80    5.10 
  -7  11   0   35.60    4.20 
  -7  11   0   38.70    3.70 
  -7  11   0   30.50    4.80 
   7  11   0   35.70    4.00 
  -8 -11   0    2.20    2.60 
   8 -11   0    0.50    2.40 
  -8 -11   0    5.20    1.30 
  -8 -11   0    2.90    2.60 
  -8 -11   0    2.60    1.70 
  -8  11   0    3.90    1.30 
   8  11   0    2.20    2.50 
   8  11   0    2.80    1.60 
  -8  11   0    4.40    1.20 
   9 -11   0  172.98   13.90 
  -9 -11   0  184.58   14.00 
  -9 -11   0  171.98   12.80 
   9 -11   0  165.38   14.10 
  -9 -11   0  179.78   14.40 
  -9 -11   0  178.78   13.30 
  -9  11   0  156.48   13.80 
   9  11   0  174.18   13.00 
  -9  11   0  152.78   12.90 
   9  11   0  165.28   14.00 
 -10 -11   0  148.39   11.70 
 -10 -11   0  142.09   11.00 
  10 -11   0  147.29   12.30 
 -10 -11   0  154.08   12.90 
  10 -11   0  143.69   12.60 
 -10 -11   0  163.98   12.50 
 -10  11   0  138.19   11.40 
  10  11   0  156.08   12.80 
 -10  11   0  139.29   12.30 
 -11 -11   0  150.08   12.50 
  11 -11   0  146.69   12.90 
 -11 -11   0  165.88   13.50 
  11 -11   0  158.78   13.30 
 -11 -11   0  170.48   13.20 
 -11 -11   0  165.38   11.70 
  11  11   0  153.38   13.50 
 -11  11   0  140.99   13.10 
 -11  11   0  151.98   12.20 
  12 -11   0    2.50    2.50 
 -12 -11   0    2.60    3.10 
 -12 -11   0    0.30    2.10 
 -12 -11   0    0.60    2.80 
  12 -11   0    1.50    3.10 
  12  11   0    0.30    3.40 
 -12  11   0    0.80    1.80 
 -12  11   0    4.60    3.00 
 -13 -11   0   -0.20    2.30 
 -13 -11   0   -0.40    2.90 
  13 -11   0    2.60    2.50 
 -13 -11   0   -0.70    2.90 
  13 -11   0   -1.10    2.90 
 -13  11   0    3.70    3.10 
 -13  11   0    2.60    2.00 
  13  11   0   -1.20    3.50 
  14 -11   0   13.20    3.50 
  14 -11   0   12.50    2.90 
 -14 -11   0   11.50    3.40 
 -14 -11   0   12.30    3.80 
 -14 -11   0   12.70    2.80 
 -14  11   0   10.80    3.70 
  14  11   0    8.20    4.10 
 -14  11   0    9.80    2.50 
  15 -11   0    2.10    2.50 
  15 -11   0    0.80    3.00 
 -15 -11   0    2.80    3.40 
 -15 -11   0    2.70    2.50 
 -15 -11   0    3.90    3.20 
 -15  11   0    2.80    2.20 
 -15  11   0    5.90    3.30 
  15  11   0    2.90    3.90 
   0 -12   0  148.59   12.00 
   0 -12   0  148.19   12.60 
   0 -12   0  144.19   11.40 
   0  12   0  149.09   12.10 
   0  12   0  149.09   11.70 
   1 -12   0    2.00    2.60 
  -1 -12   0    1.60    2.00 
   1 -12   0    1.60    1.70 
  -1 -12   0    1.70    1.40 
   1 -12   0   -1.00    1.20 
  -1 -12   0    1.00    2.70 
  -1  12   0   -0.10    2.10 
   1  12   0    2.60    1.80 
  -1  12   0    4.30    1.80 
   1  12   0    0.40    2.10 
  -1  12   0    2.90    1.80 
   1  12   0    4.50    1.80 
  -2 -12   0  208.68   15.90 
  -2 -12   0  212.78   16.80 
   2 -12   0  193.18   16.20 
  -2 -12   0  206.48   16.90 
   2 -12   0  214.18   17.00 
   2 -12   0  197.18   15.80 
  -2  12   0  233.08   16.40 
   2  12   0  213.28   16.50 
  -2  12   0  211.48   16.70 
   2  12   0  212.18   16.90 
  -2  12   0  211.98   16.30 
   2  12   0  216.68   16.20 
   3 -12   0    8.30    1.80 
   3 -12   0    9.50    1.50 
   3 -12   0    7.40    2.80 
  -3 -12   0   10.70    3.00 
  -3 -12   0    7.90    1.70 
  -3 -12   0    6.80    2.90 
  -3  12   0    5.90    2.20 
   3  12   0   11.20    2.40 
   3  12   0    8.30    2.40 
  -3  12   0   10.00    2.80 
  -3  12   0   12.00    2.20 
   3  12   0    9.10    2.40 
   4 -12   0   40.40    3.70 
  -4 -12   0   38.40    5.00 
   4 -12   0   39.50    4.90 
  -4  12   0   37.00    4.20 
   4  12   0   45.20    4.80 
  -4  12   0   44.60    4.40 
   4  12   0   44.30    4.70 
  -5 -12   0  220.58   15.30 
   5 -12   0  179.38   15.00 
  -5 -12   0  205.28   16.30 
   5 -12   0  199.58   16.30 
  -5 -12   0  201.78   16.40 
  -5  12   0  209.68   16.20 
  -5  12   0  189.68   15.70 
   5  12   0  187.98   16.20 
  -5  12   0  216.48   15.50 
   5  12   0  206.68   15.70 
  -6 -12   0  109.19    9.80 
  -6 -12   0  114.29    9.70 
   6 -12   0  114.39    9.70 
  -6 -12   0  117.79    8.40 
   6 -12   0   91.89    7.90 
  -6  12   0  111.59    8.60 
   6  12   0   97.19    8.00 
   6  12   0  112.09    8.80 
   6  12   0  103.59    9.20 
  -6  12   0  105.59    9.60 
  -7 -12   0  323.67   23.30 
   7 -12   0  295.57   23.30 
  -7 -12   0  317.87   22.30 
  -7 -12   0  318.47   23.60 
  -7  12   0  300.77   22.40 
  -7  12   0  314.67   23.30 
   7  12   0  251.07   22.20 
   7  12   0  314.57   22.60 
   7  12   0  295.07   23.00 
  -7  12   0  277.27   22.90 
   8 -12   0  190.98   14.80 
   8 -12   0  148.39   13.30 
  -8 -12   0  201.28   15.10 
  -8 -12   0  203.58   14.70 
   8  12   0  190.58   14.70 
   8  12   0  206.08   13.90 
  -8  12   0  155.88   13.40 
  -8  12   0  173.38   14.40 
  -9 -12   0  578.84   39.90 
   9 -12   0  514.25   39.90 
  -9 -12   0  539.55   40.20 
   9 -12   0  514.55   39.90 
  -9 -12   0  516.35   39.20 
  -9 -12   0  518.05   38.90 
  -9  12   0  476.35   39.60 
   9  12   0  565.94   39.20 
   9  12   0  531.55   39.90 
  10 -12   0  375.86   28.20 
  10 -12   0  363.56   28.10 
 -10 -12   0  357.86   27.00 
 -10 -12   0  386.36   28.50 
 -10 -12   0  403.06   28.20 
 -10 -12   0  377.26   27.50 
 -10 -12   0  336.07   27.10 
 -10  12   0  344.17   27.90 
  10  12   0  361.36   28.20 
 -11 -12   0  250.47   17.00 
 -11 -12   0  218.68   17.60 
  11 -12   0  217.08   18.20 
 -11 -12   0  245.98   19.50 
  11 -12   0  234.28   18.40 
 -11 -12   0  258.07   18.40 
  11  12   0  229.78   18.70 
 -11  12   0  194.28   18.10 
 -11  12   0  211.78   17.30 
  12 -12   0  255.87   19.70 
 -12 -12   0  261.07   19.90 
 -12 -12   0  258.77   19.00 
  12 -12   0  241.58   19.40 
 -12 -12   0  266.17   19.60 
 -12  12   0  230.48   19.50 
 -12  12   0  214.18   18.50 
  12  12   0  249.88   20.00 
 -13 -12   0   80.39    7.30 
 -13 -12   0   76.99    8.50 
 -13 -12   0   92.09    8.30 
  13 -12   0   80.69    8.30 
 -13  12   0   77.69    6.70 
 -13  12   0   67.29    7.80 
  13  12   0   65.39    7.90 
 -14 -12   0   60.09    7.60 
  14 -12   0   71.09    6.70 
 -14 -12   0   66.39    6.40 
 -14 -12   0   70.69    7.40 
  14 -12   0   65.49    7.40 
 -14  12   0   50.19    5.60 
 -14  12   0   56.59    6.70 
  14  12   0   56.49    7.10 
   0 -13   0    2.10    1.90 
   0 -13   0   -1.10    1.40 
   0  13   0    0.20    2.20 
   1 -13   0   36.40    4.30 
   1 -13   0   30.60    5.00 
  -1 -13   0   40.70    5.20 
  -1 -13   0   41.50    4.00 
   1 -13   0   37.10    3.80 
  -1 -13   0   41.20    5.00 
   1  13   0   45.40    5.10 
   1  13   0   41.00    4.30 
   1  13   0   37.10    4.50 
  -1  13   0   38.10    5.50 
  -2 -13   0   -1.20    1.40 
  -2 -13   0   -0.90    2.60 
   2 -13   0   -1.50    2.60 
  -2 -13   0    4.60    2.30 
   2 -13   0    0.60    1.30 
   2 -13   0    1.80    2.10 
  -2  13   0    1.40    1.80 
  -2  13   0   -0.90    2.20 
  -2  13   0   -2.00    2.30 
   2  13   0   -0.40    1.90 
   2  13   0    1.60    2.10 
   2  13   0    0.10    2.10 
   3 -13   0   63.29    7.20 
  -3 -13   0   65.79    5.60 
  -3 -13   0   68.09    6.80 
   3 -13   0   60.69    5.40 
  -3 -13   0   60.79    7.10 
   3  13   0   67.09    6.40 
  -3  13   0   68.69    7.00 
   3  13   0   61.89    6.20 
  -3  13   0   69.89    6.10 
  -3  13   0   67.29    6.30 
   4 -13   0   23.80    3.90 
  -4 -13   0   21.30    2.50 
   4 -13   0   20.90    2.30 
  -4 -13   0   21.30    3.70 
  -4 -13   0   16.50    3.50 
  -4  13   0   20.90    3.00 
  -4  13   0   23.80    2.90 
  -4  13   0   23.00    3.70 
   4  13   0   23.50    3.20 
   4  13   0   13.60    2.90 
  -5 -13   0   -0.80    2.20 
  -5 -13   0    1.70    2.60 
  -5 -13   0    0.30    1.40 
   5 -13   0    2.00    2.70 
   5 -13   0    1.00    1.10 
   5  13   0   -0.40    2.20 
  -5  13   0    3.30    2.20 
  -5  13   0    1.30    2.80 
   5  13   0    0.70    1.90 
  -6 -13   0   17.70    2.10 
  -6 -13   0   16.20    3.40 
  -6 -13   0   16.90    3.60 
   6 -13   0   18.90    3.60 
   6 -13   0   15.70    1.80 
   6  13   0   13.70    2.60 
   6  13   0   13.20    2.90 
  -6  13   0   15.40    2.90 
  -6  13   0   16.00    2.40 
  -6  13   0   12.90    3.50 
  -7 -13   0   -0.30    2.70 
   7 -13   0    1.00    2.80 
  -7 -13   0    1.00    2.90 
   7 -13   0    1.00    0.90 
  -7 -13   0   -0.60    1.30 
   7  13   0    0.70    2.60 
  -7  13   0   -0.80    1.30 
  -7  13   0    0.90    2.30 
   7  13   0    0.40    0.90 
   7  13   0   -0.20    1.70 
   8 -13   0   52.29    6.30 
  -8 -13   0   55.39    6.20 
   8 -13   0   51.39    5.90 
  -8 -13   0   56.19    4.40 
  -8 -13   0   46.10    5.80 
   8  13   0   43.50    4.30 
  -8  13   0   45.40    4.30 
   8  13   0   53.69    4.90 
   8  13   0   57.79    6.30 
  -8  13   0   43.70    5.20 
  -9 -13   0    0.90    2.90 
  -9 -13   0    2.50    1.30 
   9 -13   0    4.10    3.00 
   9 -13   0   -0.40    1.30 
  -9 -13   0   -2.80    2.70 
   9  13   0    3.20    1.50 
  -9  13   0    3.70    2.70 
   9  13   0    2.00    2.90 
 -10 -13   0    5.50    3.00 
 -10 -13   0    4.70    3.30 
  10 -13   0    4.80    2.80 
 -10 -13   0    5.40    1.30 
  10 -13   0    3.00    3.30 
 -10 -13   0    4.60    1.50 
  10  13   0   -0.10    3.20 
 -10  13   0    2.40    2.90 
 -11 -13   0   -0.60    3.10 
  11 -13   0   -1.40    3.00 
 -11 -13   0    2.60    3.10 
 -11 -13   0    0.70    0.90 
  11 -13   0   -0.60    2.60 
  11 -13   0    0.80    1.20 
 -11  13   0   -3.20    2.70 
  11  13   0    5.40    3.50 
 -12 -13   0   56.49    6.80 
 -12 -13   0   55.79    6.30 
  12 -13   0   50.09    6.00 
  12 -13   0   50.29    6.40 
 -12  13   0   50.19    6.10 
  12  13   0   55.99    6.60 
  13 -13   0    7.80    3.90 
  13 -13   0   16.60    3.30 
 -13 -13   0   13.70    2.70 
 -13 -13   0   10.70    3.80 
  13  13   0   11.40    4.20 
 -13  13   0   12.00    3.70 
   0 -14   0    6.60    3.00 
   0 -14   0    9.50    1.80 
   0  14   0    6.50    2.30 
   0  14   0    6.10    2.60 
   0  14   0    6.00    2.20 
   1 -14   0   24.30    2.60 
  -1 -14   0   20.40    3.30 
  -1 -14   0   21.30    3.90 
   1 -14   0   15.10    3.60 
  -1 -14   0   19.80    2.50 
   1  14   0   17.10    3.30 
   1  14   0   19.20    2.90 
  -1  14   0   25.70    3.30 
  -1  14   0   18.20    2.90 
  -1  14   0   17.10    3.40 
   2 -14   0  120.69   10.60 
  -2 -14   0  115.09   10.40 
  -2 -14   0   99.29    9.90 
   2 -14   0  108.49    9.10 
  -2 -14   0  107.69    9.10 
  -2  14   0  122.89    9.70 
   2  14   0  117.09    9.90 
  -2  14   0  126.69    9.70 
   2  14   0  114.39    9.50 
  -2  14   0  122.49   10.30 
  -3 -14   0   11.50    2.10 
   3 -14   0   10.10    3.40 
  -3 -14   0   14.60    3.30 
   3 -14   0   13.00    2.10 
  -3 -14   0   11.80    3.10 
  -3  14   0   19.10    2.70 
   3  14   0   18.70    3.70 
   3  14   0   14.90    2.80 
  -3  14   0   14.30    2.80 
  -3  14   0   18.20    3.50 
  -4 -14   0   65.49    5.10 
  -4 -14   0   59.39    6.70 
  -4 -14   0   50.89    6.40 
   4 -14   0   47.00    6.00 
   4 -14   0   54.99    4.90 
   4  14   0   56.39    6.10 
  -4  14   0   58.99    6.70 
  -4  14   0   59.79    5.50 
   4  14   0   52.49    5.80 
  -4  14   0   54.19    5.90 
  -5 -14   0   75.29    8.10 
   5 -14   0   79.99    8.20 
  -5 -14   0   83.39    6.60 
   5 -14   0   75.99    6.40 
  -5 -14   0   84.79    8.10 
   5  14   0   72.59    7.30 
   5  14   0   87.09    7.30 
  -5  14   0   75.79    6.90 
  -5  14   0   83.09    8.20 
  -5  14   0   75.79    7.40 
  -6 -14   0   59.29    5.10 
   6 -14   0   57.19    4.80 
   6 -14   0   63.99    6.90 
  -6 -14   0   45.50    6.00 
  -6 -14   0   62.79    6.90 
  -6  14   0   54.49    5.20 
   6  14   0   56.09    5.70 
   6  14   0   60.69    6.20 
  -6  14   0   52.99    6.10 
  -7 -14   0   62.59    5.10 
   7 -14   0   59.69    7.00 
   7 -14   0   59.09    4.80 
  -7 -14   0   54.19    6.50 
  -7 -14   0   69.99    6.90 
   7  14   0   55.59    6.00 
   7  14   0   52.99    5.60 
  -7  14   0   59.09    5.20 
  -7  14   0   50.39    5.80 
   8 -14   0  170.38   13.30 
  -8 -14   0  195.18   13.50 
   8 -14   0  188.98   14.90 
  -8 -14   0  190.18   15.20 
   8 -14   0  175.48   14.90 
  -8 -14   0  196.38   14.80 
  -8  14   0  168.68   13.40 
   8  14   0  162.08   14.50 
  -8  14   0  158.58   14.30 
   9 -14   0  121.69   11.00 
  -9 -14   0  118.49   11.10 
   9 -14   0  109.09    8.90 
  -9 -14   0  106.89    9.30 
   9 -14   0  120.89   10.70 
  -9 -14   0  131.89    9.20 
  -9 -14   0  130.99   10.70 
  -9  14   0  108.99   10.40 
   9  14   0  124.39   10.80 
 -10 -14   0  274.57   21.00 
 -10 -14   0  279.77   24.00 
  10 -14   0  288.07   22.30 
 -10 -14   0  291.67   20.90 
 -10 -14   0  314.07   22.20 
  10 -14   0  286.47   22.10 
 -10  14   0  243.98   21.80 
  10  14   0  263.47   22.10 
  11 -14   0   31.90    5.10 
 -11 -14   0   36.20    5.20 
  11 -14   0   36.20    4.90 
 -11 -14   0   42.20    3.30 
 -11 -14   0   40.60    5.10 
 -11  14   0   31.30    4.90 
  11  14   0   37.70    4.00 
  11  14   0   38.60    5.50 
 -12 -14   0  383.26   27.70 
  12 -14   0  365.56   27.40 
 -12 -14   0  414.06   27.50 
  12 -14   0  355.46   27.20 
  12  14   0  300.17   26.30 
 -12  14   0  318.87   27.30 
  12  14   0  347.57   27.60 
   0 -15   0    2.70    1.60 
   0 -15   0    0.40    2.80 
   0  15   0   -0.60    2.50 
   0  15   0   -0.60    2.10 
  -1 -15   0   19.30    2.60 
   1 -15   0   18.50    4.00 
   1 -15   0   22.90    2.60 
  -1 -15   0   26.50    4.30 
   1  15   0   22.90    3.60 
   1  15   0   24.40    3.30 
  -1  15   0   25.20    3.90 
  -1  15   0   17.30    3.10 
  -2 -15   0    5.40    3.10 
   2 -15   0    4.00    3.10 
  -2 -15   0    8.20    1.80 
   2 -15   0    5.60    1.70 
   2  15   0    3.30    2.10 
  -2  15   0    6.10    2.20 
  -2  15   0    8.10    2.50 
   2  15   0    4.40    2.50 
  -2  15   0    5.10    3.00 
  -3 -15   0   43.40    5.50 
   3 -15   0   49.60    5.80 
  -3 -15   0   50.29    4.70 
   3 -15   0   48.80    4.60 
   3  15   0   47.60    5.30 
  -3  15   0   54.29    5.90 
  -3  15   0   50.89    5.10 
  -3  15   0   44.90    5.50 
   3  15   0   49.30    5.70 
   4 -15   0    8.60    3.20 
   4 -15   0    6.50    1.70 
  -4 -15   0    2.80    3.10 
  -4 -15   0    6.70    2.90 
  -4 -15   0    5.40    1.80 
  -4  15   0    7.50    3.20 
   4  15   0    7.80    2.60 
   4  15   0    4.10    2.40 
  -4  15   0    4.50    2.40 
  -5 -15   0    7.70    3.20 
   5 -15   0    4.80    1.60 
   5 -15   0    0.90    3.00 
  -5 -15   0    5.50    1.70 
   5  15   0    3.40    2.40 
  -5  15   0    6.70    2.60 
  -5  15   0    3.50    1.90 
   5  15   0    8.10    2.50 
  -6 -15   0   20.00    4.10 
  -6 -15   0   23.70    2.60 
   6 -15   0   20.30    2.50 
   6 -15   0   21.50    4.10 
  -6 -15   0   27.60    4.30 
   6  15   0   26.50    3.30 
  -6  15   0   24.60    3.60 
   6  15   0   20.40    3.50 
  -6  15   0   23.60    2.90 
   7 -15   0   14.50    3.80 
  -7 -15   0   12.80    1.90 
  -7 -15   0   16.40    3.70 
  -7 -15   0   11.60    3.50 
   7 -15   0    9.80    3.40 
   7  15   0    9.60    3.00 
  -7  15   0    9.50    1.90 
  -7  15   0   10.20    3.00 
  -8 -15   0    5.50    3.20 
  -8 -15   0    2.60    3.00 
   8 -15   0    3.70    1.40 
   8 -15   0    2.60    3.00 
   8 -15   0    2.90    3.20 
  -8 -15   0    4.50    1.50 
  -8 -15   0    3.40    1.90 
  -8  15   0    2.50    2.70 
  -8  15   0    1.30    1.30 
   8  15   0    2.90    2.90 
  -9 -15   0   54.19    6.50 
  -9 -15   0   53.69    4.50 
  -9 -15   0   38.10    5.60 
   9 -15   0   46.10    4.30 
   9 -15   0   54.59    6.20 
   9 -15   0   52.59    5.90 
  -9 -15   0   53.59    4.80 
   9  15   0   43.60    5.60 
  -9  15   0   44.30    5.50 
  10 -15   0    6.10    1.60 
 -10 -15   0    2.60    3.40 
  10 -15   0   10.40    3.80 
 -10 -15   0    8.70    1.60 
 -10 -15   0   12.90    3.60 
  10 -15   0    8.10    3.30 
  10  15   0   10.00    3.60 
 -10  15   0   11.30    3.20 
  11 -15   0   29.40    4.60 
 -11 -15   0   37.90    5.00 
   0 -16   0  221.08   16.60 
   0 -16   0  206.78   17.80 
   0  16   0  236.08   17.60 
   0  16   0  212.68   17.00 
  -1 -16   0  146.29   11.70 
   1 -16   0  143.29   13.00 
   1 -16   0  144.59   11.70 
  -1 -16   0  156.68   13.00 
  -1  16   0  143.09   12.20 
  -1  16   0  155.18   12.80 
   1  16   0  163.58   12.70 
   1  16   0  154.08   12.20 
   2 -16   0  220.88   17.30 
   2 -16   0  231.88   18.60 
  -2 -16   0  228.38   17.40 
  -2 -16   0  227.98   18.50 
  -2  16   0  218.58   17.80 
   2  16   0  227.28   17.80 
   2  16   0  250.87   18.10 
   3 -16   0  219.28   17.80 
  -3 -16   0  228.38   17.60 
   3 -16   0  207.58   16.40 
  -3 -16   0  216.78   16.50 
   3  16   0  202.58   16.90 
  -3  16   0  212.68   17.00 
   3  16   0  234.38   17.20 
   4 -16   0   67.29    6.30 
  -4 -16   0   80.59    6.40 
   4 -16   0   69.99    8.10 
  -4 -16   0   79.69    8.10 
   4  16   0   72.79    7.10 
  -4  16   0   74.89    7.20 
  -5 -16   0  215.48   15.60 
   5 -16   0  195.78   15.60 
  -5 -16   0  224.48   17.00 
   5 -16   0  208.38   16.90 
  -5  16   0  195.78   16.20 
  -5  16   0  207.98   15.90 
   5  16   0  190.58   16.10 
   6 -16   0   47.70    6.10 
   6 -16   0   50.69    6.10 
   6 -16   0   51.19    4.80 
  -6 -16   0   64.99    6.90 
  -6 -16   0   58.19    4.90 
  -6  16   0   52.89    5.00 
  -6  16   0   48.60    5.50 
   6  16   0   49.99    5.50 
   7 -16   0   74.39    8.30 
   7 -16   0   74.19    6.40 
  -7 -16   0  105.79   11.10 
   7 -16   0   73.99    9.00 
  -7 -16   0   77.79    6.90 
  -7 -16   0   81.29    6.40 
  -7  16   0   71.59    6.50 
   7  16   0   76.29    7.70 
  -7  16   0   75.19    7.60 
  -8 -16   0  106.29    8.90 
  -8 -16   0  113.49    8.60 
   8 -16   0  110.99    8.60 
   8 -16   0  113.69   10.30 
   8 -16   0  109.79   10.70 
  -8 -16   0  121.99   10.30 
  -8  16   0  109.19    8.50 
  -8  16   0   95.89    9.80 
   8  16   0   90.59    9.80 
   9 -16   0   49.70    6.10 
  -9 -16   0   53.09    4.30 
  -9 -16   0   52.79    5.80 
  -9 -16   0   45.80    4.70 
  -9 -16   0   60.69    6.90 
   9 -16   0   49.60    5.80 
   9 -16   0   41.60    4.30 
   9  16   0   38.50    5.40 
  -9  16   0   36.10    6.20 
   0 -17   0   -1.00    2.80 
   0 -17   0   -0.70    1.60 
   0  17   0    3.20    2.40 
   1 -17   0   -2.80    1.60 
  -1 -17   0    0.80    3.00 
  -1 -17   0   -1.10    1.60 
   1 -17   0    3.20    3.10 
  -1  17   0    0.60    2.20 
   1  17   0    2.70    2.40 
  -2 -17   0    0.20    1.70 
   2 -17   0   -1.90    3.00 
   2 -17   0   -0.70    1.60 
  -2 -17   0   -0.10    3.00 
   2  17   0    0.80    2.30 
  -2  17   0    1.70    2.30 
   3 -17   0    3.50    1.80 
  -3 -17   0    5.50    3.20 
   3 -17   0   -2.70    2.90 
  -3  17   0    0.60    2.30 
   3  17   0    4.50    2.40 
   4 -17   0    7.90    5.20 
  -4 -17   0    7.30    3.30 
   4 -17   0    5.10    3.30 
   4 -17   0    5.50    1.90 
  -4  17   0    7.90    2.70 
   4  17   0    6.30    2.60 
   5 -17   0    2.40    1.70 
   5 -17   0    3.90    3.30 
  -5 -17   0    4.00    1.80 
  -5 -17   0    3.10    3.20 
  -5 -17   0    5.90    2.40 
   5 -17   0    2.10    3.30 
   5  17   0    3.10    3.40 
  -5  17   0    4.00    2.60 
  -6 -17   0   11.30    2.70 
  -6 -17   0   14.60    2.20 
   6 -17   0   11.00    3.70 
  -6 -17   0   15.60    3.80 
   6 -17   0   15.60    4.10 
   6 -17   0   14.20    2.20 
  -6  17   0    4.20    5.30 
   6  17   0   12.60    3.10 
   0 -18   0   11.10    3.50 
 -20   0   1   -2.00    3.20 
 -20   0   1    1.30    1.70 
  20   0  -1    2.20    2.90 
 -20   0   1    0.10    2.00 
  19   0  -1    2.60    2.80 
 -19   0   1    2.10    3.20 
 -19   0   1    1.80    1.90 
 -18   0   1    2.80    3.10 
 -18   0   1   -1.70    1.90 
 -18   0   1    1.30    2.30 
  18   0  -1    1.40    2.90 
 -17   0   1   38.40    4.10 
  17   0  -1   31.60    4.20 
 -17   0   1   18.30    3.90 
 -17   0   1   26.00    3.40 
 -16   0   1   -2.60    2.60 
  16   0  -1   -1.40    1.30 
 -16   0   1   -2.20    1.80 
  16   0  -1    1.40    2.70 
 -16   0   1    0.80    2.30 
 -15   0   1   79.29    8.30 
  15   0  -1   81.29    8.10 
  15   0  -1  101.09    7.20 
 -15   0   1   72.49    7.30 
  14   0  -1    2.90    1.80 
 -14   0   1   -1.20    3.70 
  14   0  -1   -0.90    2.80 
 -14   0   1    1.10    2.10 
 -13   0   1  102.89   10.00 
  13   0  -1  127.19   10.20 
 -13   0   1  100.49    9.30 
  13   0  -1  137.59    9.50 
 -12   0   1    1.40    1.90 
 -12   0   1    3.00    1.60 
  12   0  -1   -0.90    1.70 
  12   0  -1    1.70    2.20 
 -12   0   1   -1.40    2.10 
  11   0  -1 1904.41  127.79 
 -11   0   1 1543.55  127.29 
  11   0  -1 1963.20  127.39 
 -11   0   1 1540.65  127.59 
 -10   0   1    1.90    1.50 
 -10   0   1   -0.20    1.60 
  10   0  -1   -0.60    2.00 
 -10   0   1    0.80    1.80 
  10   0  -1    0.40    1.60 
  -9   0   1 2483.55  196.98 
   9   0  -1 2925.31  197.28 
   9   0  -1 2898.01  196.78 
  -9   0   1 2450.85  196.78 
  -8   0   1    3.00    1.40 
  -8   0   1    3.70    1.20 
   8   0  -1    4.20    2.10 
   8   0  -1    3.30    1.40 
  -8   0   1    5.10    1.80 
   8   0  -1    3.50    0.90 
   7   0  -1  498.85   36.30 
   7   0  -1  436.86   35.60 
  -7   0   1  482.05   35.70 
  -7   0   1  479.75   35.90 
  -7   0   1  510.55   35.90 
   7   0  -1  499.35   35.70 
   6   0  -1    0.10    0.90 
   6   0  -1    1.10    0.70 
   6   0  -1    1.00    1.70 
  -6   0   1    0.80    0.90 
  -6   0   1    1.40    1.20 
  -6   0   1    1.10    1.00 
   6   0  -1    0.40    0.80 
   5   0  -1 3678.03  265.27 
  -5   0   1 3914.51  265.27 
  -5   0   1 3757.82  265.37 
   5   0  -1 3749.72  265.17 
   5   0  -1 3383.36  265.67 
  -5   0   1 3281.17  265.27 
  -4   0   1    1.40    0.70 
  -4   0   1    3.00    0.80 
   4   0  -1    0.40    0.60 
   4   0  -1    0.90    0.70 
  -4   0   1    1.40    0.60 
  -4   0   1    2.30    0.70 
   4   0  -1    3.10    0.80 
   4   0  -1    0.60    1.40 
   4   0  -1    1.60    0.80 
   3   0  -1  655.23   50.89 
   3   0  -1  763.82   50.99 
  -3   0   1  586.54   50.89 
  -3   0   1  725.33   50.79 
  -3   0   1  710.03   50.89 
  -3   0   1  724.13   50.79 
   3   0  -1  688.63   50.79 
   2   0  -1    6.70    0.80 
  -2   0   1    4.90    0.90 
   2   0  -1   10.70    1.20 
  -2   0   1    6.90    0.80 
   2   0  -1    8.50    0.80 
  -2   0   1    6.50    0.70 
  -2   0   1    6.00    0.70 
   2   0  -1    4.90    0.80 
  -1   0  -1  299.57   21.90 
   2   0   1  158.78   10.70 
  -2   0  -1  146.09   10.80 
   2   0   1  163.38   10.90 
  -2   0  -1  134.79   10.70 
  -2   0  -1  150.78   10.70 
   2   0   1  131.59   10.70 
  -2   0  -1  130.99   10.80 
  -3   0  -1  872.61   61.59 
   3   0   1  913.01   61.49 
   3   0   1  889.31   61.59 
   3   0   1  825.42   61.39 
  -3   0  -1  809.52   61.39 
   3   0   1  719.83   61.59 
   3   0   1  834.12   61.49 
  -3   0  -1  891.61   61.49 
  -3   0  -1  791.62   61.59 
   4   0   1    4.00    0.70 
  -4   0  -1    3.10    1.10 
   4   0   1    5.80    0.90 
  -4   0  -1    3.00    1.00 
   4   0   1    1.80    1.00 
  -4   0  -1    3.20    0.80 
   4   0   1    3.30    1.00 
   4   0   1    3.00    1.30 
   4   0   1    2.60    1.40 
   4   0   1    4.30    0.80 
   5   0   1  808.02   55.29 
  -5   0  -1  686.63   55.59 
  -5   0  -1  785.22   55.39 
   5   0   1  724.13   55.29 
   5   0   1  744.03   55.69 
   5   0   1  778.02   55.59 
   6   0   1   -0.40    1.30 
  -6   0  -1   -0.10    1.10 
  -6   0  -1    0.70    1.10 
   6   0   1    0.60    0.80 
  -6   0  -1    3.10    1.00 
  -7   0  -1   33.40    3.20 
  -7   0  -1   38.80    3.70 
   7   0   1   34.40    3.10 
   7   0   1   32.70    3.00 
  -7   0  -1   36.20    3.70 
   7   0   1   36.00    4.00 
   8   0   1   -0.30    1.00 
  -8   0  -1    2.30    1.20 
   8   0   1    0.80    0.70 
  -8   0  -1    0.20    1.50 
   8   0   1    0.20    1.70 
  -8   0  -1    2.50    1.50 
   9   0   1 3377.26  230.18 
  -9   0  -1 2883.31  230.08 
  -9   0  -1 2904.81  229.78 
   9   0   1 2943.61  229.48 
  -9   0  -1 3570.94  230.18 
   9   0   1 3168.98  229.58 
 -10   0  -1   -0.70    1.80 
 -10   0  -1    0.90    1.40 
  10   0   1    2.60    2.10 
  10   0   1    3.00    1.40 
 -10   0  -1    0.90    2.00 
  10   0   1    3.20    1.00 
 -11   0  -1  399.26   33.20 
  11   0   1  475.05   33.20 
  11   0   1  505.45   33.80 
 -11   0  -1  414.96   33.60 
 -12   0  -1   -0.70    2.10 
  12   0   1    0.90    1.60 
 -12   0  -1    1.40    1.70 
 -12   0  -1    0.80    2.20 
  12   0   1    0.00    2.10 
 -13   0  -1 1263.37  104.59 
  13   0   1 1665.93  104.49 
  13   0   1 1525.55  104.99 
 -13   0  -1 1237.18  104.89 
  14   0   1    2.00    1.50 
 -14   0  -1    0.30    2.20 
 -14   0  -1    0.70    2.30 
 -14   0  -1   -1.90    1.70 
  15   0   1  683.63   46.50 
 -15   0  -1  606.14   46.10 
 -15   0  -1  577.44   46.60 
  16   0   1    1.70    2.60 
 -16   0  -1    0.20    2.80 
 -16   0  -1   -0.10    2.40 
 -16   0  -1    0.80    1.90 
  17   0   1   23.80    3.70 
 -17   0  -1   35.20    4.00 
 -17   0  -1   18.20    3.90 
 -17   0  -1   21.60    3.00 
  18   0   1   -1.00    2.60 
 -18   0  -1    0.40    1.60 
 -18   0  -1   -0.90    3.00 
 -18   0  -1   -2.00    2.30 
 -19   0  -1   44.70    4.60 
  19   0   1   43.50    5.30 
 -19   0  -1   63.39    5.80 
 -19  -1   1   20.30    3.10 
  19  -1  -1   17.40    3.50 
 -19  -1   1   11.90    2.80 
 -19  -1   1    9.10    3.60 
 -19   1   1   10.80    2.00 
  19   1  -1   14.00    3.70 
 -19   1   1   13.60    3.80 
 -19   1   1   17.50    2.80 
 -19   1   1   19.80    2.20 
 -18  -1   1    1.30    2.40 
 -18  -1   1    0.70    3.00 
 -18  -1   1    0.10    2.20 
  18  -1  -1    1.90    2.70 
 -18   1   1    1.90    1.80 
 -18   1   1    1.90    2.20 
 -18   1   1   -2.20    2.90 
  18   1  -1    0.10    2.70 
 -18   1   1   -2.20    1.60 
 -17  -1   1   40.10    3.90 
 -17  -1   1   25.10    4.30 
  17  -1  -1   24.00    3.90 
 -17  -1   1   16.40    3.20 
 -17   1   1   25.70    3.10 
 -17   1   1   20.40    4.10 
  17   1  -1   32.60    4.30 
  16  -1  -1    0.20    3.10 
 -16  -1   1    0.20    2.80 
 -16  -1   1   -0.50    2.10 
  16  -1  -1    2.80    2.60 
 -16  -1   1    1.70    2.10 
 -16   1   1    3.10    2.90 
 -16   1   1    0.30    1.70 
  16   1  -1   -3.10    2.50 
 -16   1   1   -0.20    2.30 
  15  -1  -1    2.00    2.70 
 -15  -1   1    4.00    2.40 
 -15  -1   1   -0.10    2.70 
 -15  -1   1    3.70    2.20 
 -15   1   1    3.30    1.90 
  15   1  -1    1.50    2.70 
 -15   1   1    2.30    2.60 
 -15   1   1    5.20    2.50 
  14  -1  -1    0.50    2.00 
 -14  -1   1    2.10    2.20 
 -14  -1   1    2.50    2.20 
 -14  -1   1    8.40    3.40 
  14  -1  -1    2.70    2.90 
 -14   1   1   -0.40    2.30 
  14   1  -1    3.00    1.40 
 -13  -1   1    6.80    2.30 
  13  -1  -1   11.50    2.80 
 -13  -1   1    8.80    2.20 
 -13  -1   1    8.30    2.80 
  13  -1  -1   11.10    2.30 
 -13   1   1   12.60    2.70 
  13   1  -1    8.80    2.90 
 -13   1   1    7.00    1.80 
  13   1  -1    8.60    1.70 
 -13   1   1    5.40    2.60 
  12  -1  -1   42.80    4.80 
  12  -1  -1   38.10    4.40 
 -12  -1   1   36.00    4.30 
 -12  -1   1   49.99    4.70 
 -12  -1   1   35.90    4.30 
 -12   1   1   35.80    4.60 
 -12   1   1   34.10    3.90 
  12   1  -1   35.60    4.40 
  12   1  -1   49.90    4.20 
 -11  -1   1   17.40    2.70 
  11  -1  -1   27.00    2.90 
 -11  -1   1   17.30    3.00 
  11  -1  -1   18.90    3.20 
 -11  -1   1   23.70    3.00 
  11   1  -1   26.80    3.60 
 -11   1   1   15.50    3.10 
  11   1  -1   27.80    2.80 
 -11   1   1   32.90    3.40 
  11   1  -1   20.70    2.30 
 -11   1   1   20.10    2.60 
  10  -1  -1  165.68   12.50 
 -10  -1   1  150.28   12.80 
 -10  -1   1  192.18   12.70 
  10  -1  -1  162.58   13.20 
 -10  -1   1  154.98   12.50 
  10   1  -1  135.59   12.00 
  10   1  -1  180.88   12.50 
 -10   1   1  149.59   12.30 
  10   1  -1  189.38   13.20 
 -10   1   1  144.29   12.80 
  -9  -1   1    2.70    1.80 
   9  -1  -1    3.70    2.40 
   9  -1  -1    2.40    1.50 
  -9  -1   1    2.00    1.50 
  -9  -1   1    2.80    1.60 
   9   1  -1    3.80    2.10 
  -9   1   1    2.10    1.70 
  -9   1   1    2.90    1.80 
  -9   1   1    1.30    1.20 
   9   1  -1    3.30    0.60 
   9   1  -1    2.00    0.80 
   9   1  -1    1.10    1.50 
  -8  -1   1  268.97   18.90 
   8  -1  -1  242.78   18.70 
  -8  -1   1  246.98   18.80 
  -8  -1   1  249.48   19.00 
  -8   1   1  239.78   18.60 
  -8   1   1  277.17   19.00 
   8   1  -1  238.88   18.30 
  -8   1   1  236.68   19.00 
   8   1  -1  265.37   18.80 
   8   1  -1  272.37   19.30 
   8   1  -1  220.88   18.50 
  -7  -1   1   15.90    2.00 
   7  -1  -1   18.10    2.00 
  -7  -1   1   14.30    2.00 
  -7  -1   1   14.90    2.10 
   7  -1  -1   16.80    2.10 
   7   1  -1   17.60    2.10 
  -7   1   1   17.00    2.30 
  -7   1   1   18.20    2.00 
  -7   1   1   12.80    2.10 
   7   1  -1   18.00    1.50 
   7   1  -1   18.60    1.70 
  -7   1   1   16.50    2.40 
  -6  -1   1    3.10    1.10 
  -6  -1   1    3.10    1.30 
  -6  -1   1    4.30    1.20 
   6  -1  -1    3.90    1.10 
   6  -1  -1    3.40    1.00 
   6  -1  -1    4.20    0.90 
  -6  -1   1    3.30    0.70 
  -6   1   1    3.90    1.30 
   6   1  -1    3.60    0.70 
   6   1  -1    4.60    1.70 
  -6   1   1    0.90    1.30 
   6   1  -1    1.40    1.10 
   6   1  -1    4.70    0.50 
  -6   1   1    2.80    0.90 
  -6   1   1    0.50    1.10 
   5  -1  -1    6.20    1.00 
  -5  -1   1    6.20    0.80 
   5  -1  -1    6.20    1.20 
  -5  -1   1    5.00    1.20 
  -5  -1   1    7.30    1.20 
  -5  -1   1    3.40    1.00 
  -5   1   1    6.90    1.50 
   5   1  -1    5.50    1.30 
  -5   1   1    5.50    1.20 
   5   1  -1    6.40    0.70 
   5   1  -1    6.20    1.20 
  -5   1   1    6.70    1.00 
  -5   1   1    5.60    1.20 
   5   1  -1    6.80    1.20 
  -4  -1   1  123.69    8.90 
  -4  -1   1  118.69    8.70 
   4  -1  -1  125.09    8.80 
   4  -1  -1  122.49    8.90 
   4  -1  -1  113.39    8.80 
   4  -1  -1  112.19    8.90 
  -4  -1   1  114.39    8.80 
  -4  -1   1  110.19    9.20 
   4  -1  -1  109.99    8.80 
   4   1  -1  110.49    8.80 
   4   1  -1  126.09    8.90 
   4   1  -1   92.29    8.90 
   4   1  -1  121.29    8.90 
  -4   1   1  117.49    8.70 
  -4   1   1  112.09    9.20 
   4   1  -1  125.69    8.60 
   3  -1  -1   22.00    2.10 
   3  -1  -1   19.80    2.00 
  -3  -1   1   21.90    2.30 
  -3  -1   1   24.70    2.20 
   3  -1  -1   19.60    2.30 
   3  -1  -1   22.60    2.00 
  -3  -1   1   25.00    2.00 
   3  -1  -1   22.30    2.00 
  -3  -1   1   21.40    2.10 
   3  -1  -1   23.00    2.20 
  -3   1   1   23.30    2.40 
   3   1  -1   26.30    1.80 
   3   1  -1   22.50    2.00 
  -3   1   1   27.30    2.00 
   3   1  -1   25.00    2.20 
   3   1  -1   18.60    2.00 
  -3   1   1   17.90    2.10 
  -3   1   1   22.70    2.10 
   2  -1  -1    8.90    1.00 
   2  -1  -1    7.20    0.80 
  -2  -1   1    8.90    0.90 
  -2  -1   1    5.80    0.90 
   2  -1  -1   11.50    1.10 
  -2  -1   1    5.70    0.80 
   2  -1  -1    8.80    0.90 
  -2   1   1    6.40    0.80 
   2   1  -1    7.20    0.90 
  -2   1   1    7.30    0.80 
  -2   1   1    7.00    0.80 
   2   1  -1    6.30    0.80 
  -2   1   1    7.50    0.90 
   2   1  -1    6.50    0.90 
   2   1  -1    9.30    0.80 
  -2   1   1    9.00    0.90 
  -1  -1   1    1.40    0.40 
  -1  -1   1    1.00    0.30 
  -1   1   1    1.20    0.30 
  -1   1   1    1.10    0.20 
   1   1  -1    0.80    0.30 
   1   1  -1    2.20    0.30 
  -1   1   1    1.50    0.30 
   0   1  -1    6.00    0.60 
   0   1   1    4.30    0.50 
  -1  -1  -1    8.70    0.80 
  -1  -1  -1   10.90    0.80 
   1   1   1   13.10    1.20 
  -1   1  -1    8.60    0.90 
  -1   1  -1   12.00    1.00 
   1   1   1   10.70    1.00 
   2  -1   1   54.79    4.50 
  -2  -1  -1   55.69    4.50 
   2  -1   1   58.59    4.60 
  -2  -1  -1   49.60    4.50 
  -2  -1  -1   62.09    4.60 
   2  -1   1   62.09    4.50 
   2  -1   1   64.79    4.50 
  -2  -1  -1   62.59    4.60 
   2   1   1   66.09    4.60 
  -2   1  -1   56.09    4.60 
  -2   1  -1   61.49    4.60 
   2   1   1   55.39    4.60 
  -2   1  -1   64.69    4.60 
  -2   1  -1   52.99    4.60 
   2   1   1   55.89    4.50 
  -3  -1  -1   46.00    4.00 
   3  -1   1   53.09    3.80 
   3  -1   1   47.10    4.10 
  -3  -1  -1   53.29    4.10 
  -3  -1  -1   43.80    4.00 
  -3  -1  -1   51.49    4.00 
   3  -1   1   42.80    4.20 
   3  -1   1   52.09    3.90 
   3   1   1   49.99    4.00 
   3   1   1   51.79    4.10 
   3   1   1   47.80    4.10 
  -3   1  -1   52.59    3.70 
   3   1   1   55.09    4.00 
  -3   1  -1   41.50    4.20 
  -3   1  -1   50.89    4.00 
   3   1   1   50.29    3.70 
  -3   1  -1   43.10    4.10 
  -3   1  -1   48.40    3.90 
   4  -1   1  289.27   23.10 
  -4  -1  -1  268.47   23.20 
  -4  -1  -1  330.67   23.10 
  -4  -1  -1  294.57   23.10 
   4  -1   1  316.77   23.20 
   4  -1   1  339.57   22.90 
   4  -1   1  301.47   23.10 
  -4   1  -1  339.17   22.90 
   4   1   1  320.77   23.20 
   4   1   1  298.07   23.10 
  -4   1  -1  286.57   23.30 
  -4   1  -1  298.07   23.00 
  -4   1  -1  327.27   23.20 
   4   1   1  345.37   23.10 
  -5  -1  -1   56.09    4.40 
  -5  -1  -1   47.20    4.30 
   5  -1   1   48.70    4.30 
  -5  -1  -1   54.39    4.30 
   5  -1   1   52.29    4.10 
   5   1   1   51.29    4.00 
   5   1   1   44.20    4.50 
  -5   1  -1   51.99    4.40 
  -5   1  -1   56.89    4.00 
   5   1   1   50.59    3.80 
  -5   1  -1   44.20    4.50 
  -5   1  -1   37.30    4.40 
  -6  -1  -1    0.30    1.10 
  -6  -1  -1    2.70    1.40 
   6  -1   1    2.20    1.00 
  -6  -1  -1    0.00    1.10 
   6  -1   1    1.80    0.80 
  -6   1  -1    0.30    1.20 
   6   1   1    3.20    0.60 
   6   1   1    1.00    1.30 
  -6   1  -1    1.40    1.30 
  -6   1  -1    1.30    0.80 
   7  -1   1    1.50    1.70 
   7  -1   1    4.20    1.20 
  -7  -1  -1    2.60    1.40 
   7  -1   1    4.20    1.00 
  -7  -1  -1    2.80    1.20 
  -7  -1  -1    3.70    1.40 
   7   1   1    5.30    1.70 
  -7   1  -1    3.40    1.50 
   7   1   1    3.20    0.70 
  -7   1  -1    3.60    1.50 
  -7   1  -1    4.30    1.00 
   7   1   1    5.60    1.10 
  -8  -1  -1   24.40    3.00 
   8  -1   1   25.20    2.80 
   8  -1   1   23.30    3.60 
  -8  -1  -1   21.40    2.90 
  -8  -1  -1   28.60    3.00 
  -8   1  -1   22.30    2.60 
  -8   1  -1   23.30    3.00 
   8   1   1   23.90    3.30 
   8   1   1   24.30    2.20 
   8   1   1   30.90    2.80 
  -8   1  -1   25.60    3.10 
  -9  -1  -1    2.70    1.80 
   9  -1   1    4.10    1.50 
  -9  -1  -1    3.50    1.70 
   9  -1   1    9.10    2.30 
  -9  -1  -1    4.50    1.70 
   9   1   1    5.00    0.90 
  -9   1  -1    4.60    1.30 
  -9   1  -1    6.80    2.20 
   9   1   1    5.70    1.40 
   9   1   1    5.50    2.20 
  -9   1  -1    5.60    1.90 
 -10  -1  -1   13.50    2.30 
  10  -1   1   17.40    3.00 
  10  -1   1   18.30    2.20 
 -10  -1  -1   21.50    2.70 
 -10  -1  -1   13.80    2.60 
 -10   1  -1   21.30    3.20 
  10   1   1   23.60    3.30 
 -10   1  -1   15.90    2.90 
 -10   1  -1   11.60    2.00 
  10   1   1   19.70    2.20 
 -11  -1  -1    6.50    2.00 
 -11  -1  -1    7.80    2.50 
  11  -1   1    9.30    2.60 
  11  -1   1    8.10    1.80 
 -11  -1  -1    7.80    2.10 
  11   1   1    7.10    2.40 
  11   1   1    8.60    1.50 
 -11   1  -1    3.30    2.20 
 -11   1  -1    8.40    1.80 
 -11   1  -1    8.90    2.50 
  11   1   1    7.90    1.10 
  12  -1   1   58.99    5.60 
  12  -1   1   67.19    6.40 
 -12  -1  -1   66.29    5.90 
 -12  -1  -1   58.29    6.50 
 -12  -1  -1   77.49    6.20 
 -12   1  -1   59.29    5.60 
 -12   1  -1   56.59    6.50 
  12   1   1   72.39    5.20 
  12   1   1   56.19    5.30 
  12   1   1   61.69    6.50 
 -13  -1  -1   58.69    5.30 
  13  -1   1   43.60    4.90 
  13  -1   1   44.00    4.50 
 -13  -1  -1   34.00    4.80 
 -13  -1  -1   41.90    4.80 
  13   1   1   47.80    5.00 
 -13   1  -1   41.30    4.40 
 -13   1  -1   40.50    5.00 
 -14  -1  -1   74.19    8.10 
 -14  -1  -1  102.09    7.90 
  14  -1   1   95.29    7.30 
 -14  -1  -1   72.49    7.40 
  14   1   1   87.29    8.80 
 -14   1  -1   82.89    8.20 
 -14   1  -1   78.49    7.40 
 -15  -1  -1   35.10    4.80 
  15  -1   1   51.99    4.60 
 -15  -1  -1   37.20    4.90 
  15  -1   1   42.30    4.90 
 -15   1  -1   40.60    5.20 
 -15   1  -1   41.20    4.30 
  15   1   1   43.80    4.90 
 -16  -1  -1    4.60    3.00 
  16  -1   1   19.00    2.30 
  16  -1   1   11.10    2.90 
 -16  -1  -1   16.40    2.90 
 -16  -1  -1    8.10    2.50 
  16   1   1   11.00    3.10 
 -16   1  -1    7.80    3.20 
 -16   1  -1   18.30    3.10 
 -16   1  -1    9.80    2.00 
 -17  -1  -1   13.90    3.60 
 -17  -1  -1   16.70    2.90 
  17  -1   1   14.50    3.30 
 -17  -1  -1   24.40    3.50 
 -17   1  -1   27.70    3.50 
  17   1   1   18.90    3.60 
 -17   1  -1   18.30    3.90 
 -17   1  -1   15.40    2.20 
 -18  -1  -1    2.00    2.00 
 -18  -1  -1    2.30    2.50 
  18  -1   1    0.40    2.60 
 -18  -1  -1    1.90    3.00 
 -18   1  -1    0.00    2.50 
  18   1   1    0.80    2.80 
 -18   1  -1    0.70    3.00 
 -18   1  -1    3.50    1.50 
 -18   1  -1    1.60    1.40 
 -19  -1  -1   -1.20    3.90 
 -19  -1  -1   -0.30    2.50 
  19  -1   1    1.80    2.60 
  19   1   1    0.70    3.10 
 -19   1  -1    0.10    2.30 
 -19  -2   1   33.60    5.90 
 -19  -2   1   39.40    5.20 
  19  -2  -1   40.10    5.10 
 -19  -2   1   56.49    5.50 
 -19   2   1   30.10    5.10 
 -19   2   1   54.19    4.80 
  19   2  -1   44.40    5.50 
  18  -2  -1  113.09    8.10 
 -18  -2   1   80.19    8.40 
  18  -2  -1   87.19    8.90 
 -18  -2   1  117.29    8.70 
 -18  -2   1   80.49    9.30 
  18   2  -1  101.39    9.40 
 -18   2   1   76.39    9.20 
  17  -2  -1  206.98   15.10 
  17  -2  -1  168.38   15.60 
 -17  -2   1  158.58   15.80 
  17   2  -1  195.48   16.00 
 -17   2   1  216.38   14.70 
  16  -2  -1   24.20    3.30 
  16  -2  -1   21.80    3.70 
 -16  -2   1   15.50    3.20 
 -16  -2   1   24.10    3.30 
 -16  -2   1   12.40    3.50 
  16   2  -1   23.10    3.80 
 -16   2   1   25.10    4.00 
 -16   2   1   17.90    2.50 
 -16   2   1   27.60    3.40 
 -16   2   1   23.80    2.60 
 -15  -2   1    0.80    2.20 
 -15  -2   1    4.70    2.30 
  15  -2  -1    4.20    2.20 
  15  -2  -1    2.40    2.70 
 -15  -2   1   -1.20    2.60 
 -15   2   1    2.20    2.70 
  15   2  -1    2.30    2.70 
 -15   2   1    6.50    1.80 
 -15   2   1    3.00    1.70 
 -15   2   1    4.30    2.40 
 -14  -2   1   27.10    3.80 
 -14  -2   1   39.00    4.00 
  14  -2  -1   33.70    3.80 
 -14  -2   1   22.20    3.90 
  14   2  -1   29.10    4.30 
 -14   2   1   44.40    4.80 
 -13  -2   1   68.59    7.40 
  13  -2  -1   76.59    6.70 
 -13  -2   1   73.29    6.80 
 -13  -2   1   92.39    7.00 
  13  -2  -1   70.79    7.40 
 -13   2   1   62.89    7.30 
 -13   2   1   66.29    6.20 
  13   2  -1   88.89    7.70 
 -12  -2   1   56.39    6.20 
 -12  -2   1   65.29    5.90 
 -12  -2   1   54.39    5.70 
  12  -2  -1   56.89    6.00 
  12  -2  -1   57.89    6.60 
 -12   2   1   63.69    6.30 
  12   2  -1   69.79    4.90 
 -12   2   1   56.99    5.20 
  12   2  -1   75.49    6.80 
  12   2  -1   53.89    4.70 
  11  -2  -1 1640.74  120.29 
  11  -2  -1 1699.73  119.59 
 -11  -2   1 1513.75  119.79 
 -11  -2   1 1500.55  119.89 
  11   2  -1 1851.21  119.29 
 -11   2   1 1493.25  119.39 
  11   2  -1 1883.01  120.19 
  11   2  -1 1581.24  119.29 
 -11   2   1 1513.25  119.89 
 -10  -2   1   60.49    6.20 
  10  -2  -1   65.19    5.90 
 -10  -2   1   80.49    6.10 
 -10  -2   1   66.99    6.00 
 -10   2   1   62.39    6.30 
 -10   2   1   80.09    6.30 
  10   2  -1   66.49    5.40 
 -10   2   1   63.49    5.50 
  10   2  -1   58.59    5.10 
  10   2  -1   75.79    6.80 
  -9  -2   1 1912.51  146.89 
   9  -2  -1 2071.99  146.79 
  -9  -2   1 1940.01  146.99 
  -9  -2   1 2260.47  146.99 
  -9   2   1 1888.01  146.99 
  -9   2   1 2150.28  147.09 
  -9   2   1 1823.72  146.59 
   9   2  -1 1852.51  146.49 
   9   2  -1 2001.50  147.19 
  -9   2   1 2139.49  147.09 
  -8  -2   1    6.70    1.60 
   8  -2  -1    9.70    1.80 
  -8  -2   1    9.50    2.00 
  -8  -2   1    7.70    1.80 
  -8  -2   1    7.30    1.00 
  -8   2   1    5.30    1.90 
  -8   2   1    7.60    1.30 
  -8   2   1    8.50    2.00 
   8   2  -1    8.50    2.20 
   8   2  -1    8.90    1.30 
  -8   2   1    4.50    1.70 
  -7  -2   1   14.20    2.10 
  -7  -2   1   18.90    1.70 
  -7  -2   1   15.10    2.10 
  -7  -2   1   24.40    2.50 
  -7   2   1   21.30    2.80 
   7   2  -1   16.10    2.60 
  -7   2   1   16.80    1.90 
  -7   2   1   21.00    2.30 
   7   2  -1   14.80    1.80 
  -7   2   1   18.00    2.30 
  -6  -2   1   31.40    3.00 
   6  -2  -1   31.40    2.80 
  -6  -2   1   28.20    2.80 
   6  -2  -1   32.70    3.00 
  -6  -2   1   30.90    2.30 
  -6  -2   1   27.10    2.90 
  -6   2   1   30.00    3.30 
  -6   2   1   20.60    2.80 
   6   2  -1   24.30    3.00 
  -6   2   1   27.70    3.00 
   6   2  -1   21.00    2.50 
  -6   2   1   24.70    2.40 
   5  -2  -1 1565.94  117.29 
  -5  -2   1 1540.95  117.09 
   5  -2  -1 1673.03  117.29 
  -5  -2   1 1708.03  117.29 
  -5  -2   1 1641.84  117.39 
  -5  -2   1 1684.13  117.29 
   5   2  -1 1847.82  117.09 
  -5   2   1 1650.93  117.09 
  -5   2   1 1667.03  117.39 
  -5   2   1 1466.85  117.19 
  -5   2   1 1516.65  117.09 
   5   2  -1 1402.66  117.09 
   5   2  -1 1388.06  117.39 
  -5   2   1 1657.43  117.29 
  -4  -2   1  138.19   10.10 
  -4  -2   1  136.69    9.90 
   4  -2  -1  123.49   10.00 
  -4  -2   1  130.79   10.10 
  -4  -2   1  136.29    9.80 
   4  -2  -1  122.89   10.00 
  -4  -2   1  135.49   10.20 
   4  -2  -1  129.39   10.00 
   4   2  -1  155.78   10.30 
  -4   2   1  145.79    9.90 
  -4   2   1  121.49    9.90 
  -4   2   1  131.09   10.00 
   4   2  -1  125.69   10.20 
   4   2  -1  130.99   10.20 
   4   2  -1  116.69    9.90 
   4   2  -1  124.29   10.00 
   4   2  -1  153.38    9.90 
  -4   2   1  131.59    9.90 
  -3  -2   1   34.60    2.90 
   3  -2  -1   37.80    2.80 
  -3  -2   1   31.70    2.70 
   3  -2  -1   32.10    2.90 
   3  -2  -1   31.10    3.00 
   3  -2  -1   33.50    2.90 
  -3  -2   1   28.30    2.90 
   3  -2  -1   38.00    2.70 
  -3  -2   1   31.90    3.00 
  -3   2   1   31.10    3.00 
   3   2  -1   38.20    2.80 
   3   2  -1   30.20    2.80 
   3   2  -1   34.60    2.80 
  -3   2   1   30.10    2.70 
   3   2  -1   39.70    3.30 
  -3   2   1   42.80    2.90 
  -3   2   1   35.90    2.80 
  -3   2   1   37.40    3.00 
   2  -2  -1   19.00    1.70 
   2  -2  -1   17.60    1.70 
  -2  -2   1   20.30    1.70 
  -2  -2   1   20.50    1.70 
  -2  -2   1   20.40    2.10 
  -2  -2   1   20.00    1.70 
  -2  -2   1   26.40    2.40 
   2  -2  -1   19.00    1.70 
   2  -2  -1   15.10    2.00 
   2  -2  -1   18.50    1.90 
   2   2  -1   18.50    1.70 
   2   2  -1   18.30    1.80 
   2   2  -1   19.30    1.90 
  -2   2   1   22.30    1.80 
   2   2  -1   20.20    2.00 
  -2   2   1   19.50    1.70 
   1  -2  -1    8.80    1.10 
  -1  -2   1   11.70    1.00 
   1  -2  -1   11.30    1.00 
  -1  -2   1   11.00    1.10 
   1  -2  -1   11.80    1.20 
   1  -2  -1   11.30    1.10 
   1  -2  -1   12.10    1.20 
  -1  -2   1    7.80    1.20 
  -1  -2   1    9.80    0.90 
  -1  -2   1    9.20    1.10 
   1   2  -1   10.70    1.20 
   1   2  -1   14.50    1.30 
  -1   2   1    9.70    1.00 
   1   2  -1    9.90    1.00 
   1   2  -1   11.40    0.90 
  -1   2   1   12.80    1.20 
  -1   2   1   11.10    1.10 
   1   2  -1   11.60    1.30 
   0  -2  -1  399.26   28.30 
   0  -2   1  414.06   28.40 
   0  -2   1  385.66   28.30 
   0  -2   1  335.57   28.40 
   0  -2  -1  356.96   28.50 
   0  -2  -1  392.86   28.50 
   0  -2  -1  327.67   28.40 
   0  -2  -1  342.77   28.30 
   0  -2   1  413.76   28.50 
   0   2   1  426.26   28.40 
   0   2  -1  422.16   28.40 
   0   2   1  396.36   28.30 
   0   2   1  415.66   28.30 
   0   2   1  395.26   28.50 
   0   2  -1  366.46   28.40 
   0   2  -1  395.96   28.50 
   1  -2   1   87.19    6.20 
   1  -2   1   87.19    6.20 
   1  -2   1   84.99    6.20 
  -1  -2  -1   82.49    6.30 
   1  -2   1   74.89    6.30 
  -1  -2  -1   74.39    6.40 
   1  -2   1   84.59    6.30 
  -1  -2  -1   87.19    6.20 
   1  -2   1   82.29    6.30 
  -1  -2  -1   84.19    6.30 
   1   2   1   83.49    6.20 
   1   2   1   81.59    6.40 
  -1   2  -1   87.79    6.40 
   1   2   1   82.59    6.40 
  -1   2  -1   88.39    6.20 
  -1   2  -1   80.99    6.20 
  -1   2  -1   83.49    6.20 
   1   2   1   85.79    6.20 
   1   2   1   77.89    6.30 
  -2  -2  -1  365.76   24.90 
   2  -2   1  332.37   25.20 
  -2  -2  -1  339.67   25.20 
  -2  -2  -1  316.37   24.90 
   2  -2   1  335.17   25.00 
  -2  -2  -1  325.27   25.00 
   2  -2   1  336.47   25.00 
   2  -2   1  385.96   24.90 
   2  -2   1  335.37   25.00 
  -2  -2  -1  349.77   25.10 
  -2  -2  -1  308.47   25.10 
  -2   2  -1  308.67   25.00 
   2   2   1  319.57   24.90 
   2   2   1  369.06   25.20 
   2   2   1  353.56   24.90 
   2   2   1  321.07   25.00 
  -2   2  -1  349.07   25.00 
  -2   2  -1  347.47   25.10 
  -2   2  -1  341.57   25.00 
  -2   2  -1  353.36   24.90 
   2   2   1  341.17   25.00 
   3  -2   1  371.16   28.30 
  -3  -2  -1  377.86   28.10 
  -3  -2  -1  355.86   28.30 
   3  -2   1  387.76   28.30 
  -3  -2  -1  376.76   28.10 
  -3  -2  -1  341.97   28.20 
   3  -2   1  381.16   28.30 
  -3  -2  -1  407.86   28.30 
   3  -2   1  406.76   28.40 
   3   2   1  392.36   28.40 
  -3   2  -1  383.36   28.30 
   3   2   1  388.86   28.10 
  -3   2  -1  407.56   28.30 
  -3   2  -1  381.06   28.30 
   3   2   1  393.46   28.40 
   3   2   1  396.66   28.30 
   3   2   1  412.16   28.10 
   3   2   1  371.96   28.30 
  -3   2  -1  353.86   28.30 
  -4  -2  -1  533.95   36.40 
   4  -2   1  501.95   36.50 
  -4  -2  -1  525.95   36.30 
   4  -2   1  462.35   36.20 
  -4  -2  -1  472.25   36.30 
   4  -2   1  484.55   36.20 
   4  -2   1  474.15   36.20 
   4   2   1  482.45   36.30 
   4   2   1  530.95   36.50 
  -4   2  -1  451.55   36.30 
   4   2   1  513.55   36.00 
   4   2   1  467.75   36.30 
  -4   2  -1  503.15   36.30 
  -4   2  -1  515.55   36.40 
  -4   2  -1  457.05   36.20 
   5  -2   1  201.58   14.90 
  -5  -2  -1  209.68   15.00 
  -5  -2  -1  216.38   15.00 
  -5  -2  -1  189.58   14.90 
   5  -2   1  192.28   14.80 
   5   2   1  212.98   14.60 
  -5   2  -1  203.28   14.90 
   5   2   1  177.58   15.00 
  -5   2  -1  188.58   14.80 
  -5   2  -1  178.18   14.90 
  -6  -2  -1   18.60    2.30 
  -6  -2  -1   22.60    2.60 
  -6  -2  -1   17.10    2.30 
   6   2   1   25.90    1.80 
  -6   2  -1   18.50    2.20 
  -6   2  -1   22.10    2.80 
  -6   2  -1   22.30    1.90 
  -6   2  -1   15.80    2.30 
  -6   2  -1   18.50    2.30 
   6   2   1   16.60    2.50 
  -7  -2  -1   -0.30    1.20 
  -7  -2  -1    1.00    1.40 
  -7  -2  -1   -0.40    1.10 
   7  -2   1    1.60    1.30 
   7   2   1    0.30    1.50 
  -7   2  -1    1.40    1.50 
  -7   2  -1    1.40    1.50 
  -7   2  -1    1.90    0.80 
  -7   2  -1    0.70    1.40 
   8  -2   1   80.59    6.30 
  -8  -2  -1   82.49    6.60 
  -8  -2  -1   84.99    6.80 
  -8  -2  -1   78.69    6.50 
  -8   2  -1   75.59    6.80 
  -8   2  -1   75.79    6.70 
  -8   2  -1   63.59    6.60 
  -8   2  -1   75.29    5.90 
   8   2   1   64.89    6.80 
  -9  -2  -1 1783.92  137.29 
   9  -2   1 1973.40  137.09 
  -9  -2  -1 2032.50  137.39 
  -9  -2  -1 1824.82  137.39 
  -9   2  -1 1786.42  137.29 
  -9   2  -1 1871.21  137.49 
  -9   2  -1 1802.72  136.89 
   9   2   1 1891.41  137.49 
 -10  -2  -1   22.00    3.10 
 -10  -2  -1   20.00    3.30 
  10  -2   1   29.50    3.40 
 -10  -2  -1   32.20    3.80 
  10  -2   1   27.80    4.00 
 -10   2  -1   29.10    3.60 
  10   2   1   32.60    3.90 
 -10   2  -1   30.20    3.70 
 -10   2  -1   28.30    2.90 
  11  -2   1  337.17   26.30 
 -11  -2  -1  403.26   26.20 
 -11  -2  -1  309.97   25.90 
  11  -2   1  346.17   25.70 
 -11  -2  -1  309.17   26.10 
 -11   2  -1  322.07   26.10 
 -11   2  -1  336.77   25.50 
  11   2   1  392.06   26.40 
 -12  -2  -1   27.90    3.50 
  12  -2   1   32.50    3.40 
  12  -2   1   25.70    3.80 
 -12  -2  -1   24.50    3.80 
 -12  -2  -1   38.30    4.30 
 -12   2  -1   37.40    4.10 
 -12   2  -1   27.20    3.80 
 -12   2  -1   29.00    3.30 
  12   2   1   33.20    4.30 
  13  -2   1 1664.53  121.49 
 -13  -2  -1 1619.04  121.39 
 -13  -2  -1 1527.85  121.49 
  13  -2   1 1685.53  121.49 
 -13   2  -1 1620.24  120.99 
  13   2   1 1918.41  121.69 
 -13   2  -1 1528.35  121.59 
 -14  -2  -1   97.79    7.50 
  14  -2   1   81.29    6.90 
 -14  -2  -1   64.59    7.20 
 -14  -2  -1   66.69    7.70 
  14   2   1   96.19    8.00 
 -14   2  -1   67.29    7.70 
  15  -2   1 1236.08   78.19 
 -15  -2  -1  973.90   78.69 
  15  -2   1 1102.29   78.59 
 -15  -2  -1  972.20   78.39 
  15   2   1 1274.07   78.89 
 -15   2  -1  941.91   77.89 
 -15   2  -1  949.40   78.69 
  16  -2   1   74.19    6.20 
 -16  -2  -1   52.99    6.60 
  16  -2   1   62.69    6.90 
 -16  -2  -1   53.99    6.50 
 -16  -2  -1   69.89    6.80 
 -16   2  -1   56.99    7.30 
 -16   2  -1   88.59    7.00 
  16   2   1   71.79    7.50 
  17  -2   1  101.69   10.30 
 -17  -2  -1  127.79   10.30 
  17  -2   1  127.29    9.60 
 -17  -2  -1   86.99   10.60 
 -17   2  -1  136.09   10.20 
  17   2   1  121.09   10.70 
  18  -2   1    5.70    2.70 
 -18  -2  -1    3.60    2.30 
 -18  -2  -1    6.00    3.00 
 -18  -2  -1    5.40    2.60 
 -18   2  -1    0.50    2.90 
  18   2   1   10.80    3.40 
 -18   2  -1    8.80    2.60 
 -19  -2  -1   33.50    4.70 
  19  -2   1   38.70    5.00 
 -19  -2  -1   54.89    5.70 
 -19  -2  -1   44.30    5.70 
 -19   2  -1   55.69    5.30 
 -19  -3   1   -0.10    2.90 
  19  -3  -1    3.50    3.00 
 -19  -3   1    0.50    2.30 
 -19   3   1    5.30    3.20 
 -19   3   1    3.20    1.90 
 -18  -3   1  113.49    9.10 
 -18  -3   1   85.29    9.00 
  18  -3  -1  113.19    8.80 
  18  -3  -1   97.39    9.40 
 -18  -3   1   91.89    9.70 
 -18   3   1   78.29    9.50 
 -18   3   1  112.09    8.50 
  18   3  -1  107.69   10.00 
 -17  -3   1    1.10    2.80 
  17  -3  -1    3.60    2.70 
  17  -3  -1    1.70    2.30 
 -17  -3   1    2.40    2.60 
  17   3  -1    1.50    3.10 
 -17   3   1    3.80    3.10 
 -17   3   1    3.10    2.00 
 -16  -3   1   68.79    7.80 
 -16  -3   1   78.09    8.40 
  16  -3  -1   76.79    8.20 
  16  -3  -1   93.49    7.80 
 -16  -3   1   92.89    7.90 
 -16   3   1   71.59    8.40 
  16   3  -1   89.69    8.80 
 -16   3   1  103.39    7.60 
 -15  -3   1    3.80    2.80 
  15  -3  -1    7.60    2.90 
  15  -3  -1    7.10    2.40 
 -15  -3   1    6.50    2.60 
 -15  -3   1    4.50    2.40 
 -15   3   1    9.20    2.40 
 -15   3   1    5.80    2.90 
  15   3  -1    7.20    3.10 
  14  -3  -1   17.30    2.80 
 -14  -3   1   12.20    3.20 
 -14  -3   1   10.10    2.80 
  14  -3  -1   17.40    3.30 
 -14  -3   1   15.30    2.90 
  14   3  -1   12.90    3.50 
 -14   3   1   13.70    1.90 
 -14   3   1   20.90    2.90 
 -13  -3   1   -0.60    2.30 
  13  -3  -1    3.50    2.80 
 -13  -3   1    4.00    2.20 
  13  -3  -1    2.30    2.10 
 -13  -3   1    2.30    2.10 
 -13   3   1    1.50    2.50 
 -13   3   1    2.00    1.30 
 -13   3   1    1.20    1.30 
  13   3  -1    4.00    2.90 
 -13   3   1    4.40    2.20 
 -12  -3   1   77.19    7.50 
 -12  -3   1   80.29    7.20 
 -12  -3   1   89.79    7.20 
  12  -3  -1   76.39    7.00 
 -12   3   1   74.79    7.50 
  12   3  -1   93.69    8.00 
 -12   3   1   74.59    6.30 
 -12   3   1   75.29    6.40 
 -11  -3   1   -0.60    1.70 
 -11  -3   1    0.70    1.70 
 -11  -3   1   -1.20    2.00 
  11  -3  -1    0.00    1.80 
  11   3  -1    0.80    2.40 
 -11   3   1   -0.30    1.10 
 -11   3   1    0.00    2.00 
 -11   3   1    0.20    1.70 
 -11   3   1   -0.20    2.10 
 -11   3   1    0.30    1.20 
  10  -3  -1   24.00    3.00 
 -10  -3   1   23.20    2.90 
 -10  -3   1   20.80    3.00 
 -10  -3   1   21.40    3.00 
 -10   3   1   16.80    2.90 
 -10   3   1   20.80    2.40 
  10   3  -1   20.40    2.00 
  10   3  -1   27.30    2.20 
 -10   3   1   21.80    3.30 
 -10   3   1   18.90    2.30 
 -10   3   1   26.60    2.90 
  10   3  -1   22.60    3.50 
  -9  -3   1   13.90    2.10 
  -9  -3   1   12.30    1.30 
   9  -3  -1   12.10    2.30 
  -9  -3   1    9.30    2.10 
  -9  -3   1   10.80    2.20 
  -9   3   1   10.90    2.00 
  -9   3   1   14.20    1.70 
  -9   3   1   10.40    2.30 
   9   3  -1   15.30    1.70 
  -9   3   1   10.90    2.40 
  -9   3   1   11.30    1.40 
   9   3  -1    6.80    2.40 
  -8  -3   1   53.89    5.30 
  -8  -3   1   60.19    4.30 
  -8  -3   1   62.79    5.10 
   8  -3  -1   56.29    5.20 
  -8  -3   1   54.69    5.20 
   8   3  -1   57.79    4.50 
  -8   3   1   52.69    4.60 
   8   3  -1   42.50    5.50 
  -8   3   1   49.90    4.90 
  -8   3   1   59.99    5.70 
  -8   3   1   52.99    5.20 
  -8   3   1   58.09    4.50 
  -7  -3   1   57.69    5.20 
   7  -3  -1   60.29    5.20 
  -7  -3   1   62.99    5.10 
  -7  -3   1   61.69    4.50 
  -7  -3   1   61.99    5.30 
  -7   3   1   47.40    4.80 
  -7   3   1   63.09    5.20 
  -7   3   1   56.49    4.60 
  -7   3   1   53.59    4.50 
   7   3  -1   53.09    5.50 
   7   3  -1   62.19    4.60 
  -6  -3   1  730.93   51.99 
   6  -3  -1  645.14   51.79 
  -6  -3   1  716.23   51.69 
   6  -3  -1  702.43   51.99 
  -6  -3   1  714.93   52.09 
  -6  -3   1  704.43   51.99 
   6   3  -1  699.63   51.69 
   6   3  -1  651.23   52.09 
  -6   3   1  730.33   51.99 
  -6   3   1  613.94   51.79 
  -6   3   1  806.72   51.69 
  -6   3   1  708.43   51.69 
  -6   3   1  738.03   52.09 
  -5  -3   1  272.87   20.10 
  -5  -3   1  287.87   20.30 
  -5  -3   1  278.67   20.20 
   5  -3  -1  265.77   20.00 
  -5  -3   1  262.47   19.80 
  -5  -3   1  244.38   19.90 
  -5   3   1  234.28   19.90 
  -5   3   1  277.07   20.20 
   5   3  -1  253.07   19.90 
   5   3  -1  260.47   20.30 
  -5   3   1  299.97   19.90 
  -5   3   1  287.17   20.10 
  -5   3   1  282.27   19.90 
  -4  -3   1   42.10    3.70 
  -4  -3   1   43.50    3.40 
  -4  -3   1   43.00    4.00 
   4  -3  -1   45.20    3.60 
   4  -3  -1   50.09    3.50 
  -4  -3   1   44.50    3.90 
  -4  -3   1   38.70    3.40 
   4  -3  -1   38.50    3.50 
  -4   3   1   44.60    3.70 
  -4   3   1   40.60    3.50 
  -4   3   1   49.40    3.80 
  -4   3   1   46.50    3.50 
   4   3  -1   43.80    3.60 
   4   3  -1   41.50    3.50 
  -3  -3   1   35.90    3.20 
  -3  -3   1   52.89    4.10 
   3  -3  -1   43.00    3.40 
   3  -3  -1   43.30    3.20 
  -3  -3   1   40.00    3.30 
  -3  -3   1   38.80    3.30 
   3   3  -1   38.90    3.30 
   3   3  -1   42.70    4.10 
   3   3  -1   44.40    3.60 
  -3   3   1   40.50    3.30 
  -3   3   1   37.80    3.30 
  -3   3   1   42.80    3.40 
   3   3  -1   41.30    3.80 
   3   3  -1   36.50    3.30 
   2  -3  -1  179.88   12.80 
  -2  -3   1  163.58   12.70 
  -2  -3   1  158.68   12.70 
   2  -3  -1  180.38   12.80 
   2  -3  -1  173.78   12.70 
  -2  -3   1  170.68   12.80 
   2  -3  -1  176.98   12.70 
   2   3  -1  172.78   13.00 
   2   3  -1  169.78   12.80 
   2   3  -1  179.38   12.70 
  -2   3   1  166.48   12.70 
   2   3  -1  169.88   12.70 
  -2   3   1  169.88   12.80 
  -2   3   1  187.18   12.80 
   2   3  -1  157.58   12.80 
   2   3  -1  160.08   12.90 
  -2   3   1  174.68   12.80 
  -1  -3   1   30.40    2.80 
   1  -3  -1   26.90    2.80 
   1  -3  -1   32.40    2.90 
  -1  -3   1   32.20    2.90 
   1  -3  -1   30.90    2.60 
   1  -3  -1   28.20    2.40 
   1  -3  -1   32.50    2.80 
  -1  -3   1   32.20    2.60 
  -1  -3   1   30.10    2.40 
  -1  -3   1   31.50    2.50 
   1   3  -1   29.70    2.80 
  -1   3   1   33.80    2.80 
   1   3  -1   32.00    2.80 
  -1   3   1   33.30    2.60 
   1   3  -1   32.50    2.40 
   1   3  -1   31.10    2.40 
  -1   3   1   28.70    2.40 
   0  -3  -1   75.49    5.70 
   0  -3  -1   75.49    6.00 
   0  -3   1   70.39    5.60 
   0  -3   1   72.99    5.90 
   0  -3   1   73.69    5.90 
   0  -3   1   83.69    5.80 
   0  -3   1   83.39    6.00 
   0  -3  -1   75.19    6.10 
   0   3   1   75.19    5.60 
   0   3   1   79.99    6.00 
   0   3  -1   80.19    5.80 
   0   3   1   65.89    5.90 
   0   3   1   78.29    5.60 
   1  -3   1   42.00    4.00 
   1  -3   1   50.79    3.80 
   1  -3   1   52.59    4.10 
  -1  -3  -1   53.89    3.90 
   1  -3   1   46.60    3.70 
  -1  -3  -1   43.10    4.20 
   1  -3   1   49.99    3.90 
  -1  -3  -1   47.40    3.90 
  -1  -3  -1   50.19    3.70 
  -1  -3  -1   47.40    4.10 
  -1   3  -1   52.89    3.80 
  -1   3  -1   46.30    3.80 
   1   3   1   45.70    3.70 
   1   3   1   48.70    4.20 
   1   3   1   49.00    3.70 
   1   3   1   46.30    3.90 
   1   3   1   49.40    3.90 
  -1   3  -1   51.39    3.70 
   2  -3   1   11.80    1.30 
  -2  -3  -1    8.10    1.40 
   2  -3   1   11.80    1.40 
  -2  -3  -1    9.80    1.10 
  -2  -3  -1    7.90    0.90 
   2  -3   1    6.70    1.20 
  -2  -3  -1    9.70    1.10 
   2  -3   1    7.80    1.00 
   2  -3   1    6.80    1.00 
   2  -3   1   11.10    1.30 
  -2   3  -1    9.10    1.10 
   2   3   1   12.50    1.20 
  -2   3  -1   11.70    1.50 
   2   3   1    9.00    1.00 
   2   3   1    6.10    1.10 
  -2   3  -1    9.90    1.10 
   2   3   1    9.90    1.10 
  -2   3  -1    8.40    1.10 
   2   3   1   18.80    2.20 
   3  -3   1   53.49    4.10 
  -3  -3  -1   45.60    3.90 
  -3  -3  -1   50.09    4.20 
   3  -3   1   45.10    4.00 
   3  -3   1   58.19    3.80 
   3  -3   1   51.79    4.00 
  -3  -3  -1   53.59    3.90 
   3   3   1   46.20    4.00 
   3   3   1   50.99    4.40 
  -3   3  -1   51.49    4.40 
   3   3   1   50.59    3.90 
  -3   3  -1   46.70    4.10 
  -3   3  -1   48.90    4.10 
  -3   3  -1   49.60    3.90 
  -3   3  -1   53.29    4.10 
   4  -3   1  193.88   14.00 
  -4  -3  -1  173.38   13.70 
  -4  -3  -1  202.18   14.10 
   4  -3   1  180.08   13.90 
  -4  -3  -1  183.88   13.70 
  -4  -3  -1  180.28   14.10 
  -4  -3  -1  199.48   14.20 
  -4   3  -1  174.68   14.10 
   4   3   1  185.78   13.80 
   4   3   1  198.68   14.10 
  -4   3  -1  192.68   14.00 
  -4   3  -1  189.18   14.00 
  -4   3  -1  172.38   13.90 
  -5  -3  -1  239.58   16.90 
  -5  -3  -1  236.78   16.80 
  -5  -3  -1  218.38   16.80 
  -5   3  -1  223.48   16.70 
  -5   3  -1  226.78   16.80 
  -5   3  -1  199.68   16.70 
   5   3   1  237.18   16.90 
  -5   3  -1  200.98   16.60 
  -6  -3  -1    6.70    1.60 
  -6  -3  -1    8.90    1.70 
  -6  -3  -1   11.90    1.80 
  -6   3  -1    7.50    1.50 
  -6   3  -1    7.40    1.50 
  -6   3  -1    5.30    1.40 
   6   3   1    4.90    1.80 
  -6   3  -1    5.00    1.60 
  -7  -3  -1  170.48   12.50 
  -7  -3  -1  168.18   12.80 
  -7  -3  -1  176.18   12.60 
  -7   3  -1  137.59   12.40 
  -7   3  -1  161.38   12.80 
   7   3   1  144.39   12.60 
  -7   3  -1  168.28   12.50 
  -8  -3  -1   46.20    4.60 
  -8  -3  -1   43.70    4.50 
   8  -3   1   44.30    4.40 
  -8  -3  -1   46.20    4.40 
  -8   3  -1   36.20    4.40 
   8   3   1   38.40    4.60 
  -8   3  -1   51.49    5.00 
  -8   3  -1   46.10    4.60 
  -9  -3  -1   72.09    6.70 
   9  -3   1   73.09    6.40 
  -9  -3  -1   76.89    6.60 
  -9  -3  -1   70.69    6.60 
  -9   3  -1   74.79    6.80 
  -9   3  -1   74.19    6.70 
  -9   3  -1   72.89    6.60 
 -10  -3  -1  402.56   31.20 
 -10  -3  -1  392.76   31.30 
  10  -3   1  398.16   31.40 
 -10  -3  -1  460.45   31.30 
 -10   3  -1  435.26   31.40 
 -10   3  -1  401.36   31.30 
  10   3   1  379.76   31.50 
 -10   3  -1  458.65   31.40 
 -11  -3  -1   29.10    3.70 
  11  -3   1   29.10    3.40 
 -11  -3  -1   29.30    3.70 
 -11  -3  -1   26.20    3.70 
 -11   3  -1   26.80    3.80 
 -11   3  -1   39.70    4.40 
  11   3   1   23.80    3.90 
 -12  -3  -1   -0.10    2.10 
 -12  -3  -1    3.90    2.40 
 -12  -3  -1    1.90    2.10 
  12  -3   1    3.70    2.70 
  12  -3   1   -1.30    1.70 
  12   3   1   -0.80    2.50 
 -12   3  -1    0.50    2.10 
 -12   3  -1    1.10    2.20 
 -13  -3  -1   18.20    3.30 
  13  -3   1   25.50    3.10 
 -13  -3  -1   22.90    3.30 
 -13  -3  -1   27.90    3.60 
  13  -3   1   18.70    3.50 
 -13   3  -1   20.90    3.70 
  13   3   1   19.90    3.60 
 -13   3  -1   37.50    3.90 
 -14  -3  -1   10.60    3.10 
  14  -3   1   12.50    2.50 
 -14  -3  -1   13.50    2.80 
  14  -3   1   11.20    3.00 
 -14  -3  -1   14.20    2.90 
 -14   3  -1   16.80    3.00 
 -14   3  -1   10.40    3.10 
  14   3   1    9.00    3.30 
 -15  -3  -1   42.80    5.00 
 -15  -3  -1   27.10    4.50 
  15  -3   1   29.30    4.20 
 -15  -3  -1   33.20    4.30 
  15  -3   1   41.60    4.40 
 -15   3  -1   43.20    5.10 
 -15   3  -1   27.80    4.50 
  15   3   1   38.00    4.70 
 -16  -3  -1    4.60    2.90 
  16  -3   1    4.00    2.20 
 -16  -3  -1   -1.80    2.30 
  16  -3   1    2.10    2.50 
 -16   3  -1    4.40    3.00 
  16   3   1    1.70    3.10 
 -16   3  -1    2.20    2.40 
 -17  -3  -1    8.20    2.80 
  17  -3   1   14.30    2.60 
 -17  -3  -1    5.80    2.70 
 -17  -3  -1   13.20    3.50 
  17  -3   1   12.60    3.20 
 -17   3  -1   16.10    2.80 
  17   3   1   17.80    3.60 
 -17   3  -1    7.30    3.30 
 -18  -3  -1    0.50    2.50 
 -18  -3  -1   -3.00    2.80 
  18  -3   1    2.50    2.00 
 -18  -3  -1    4.20    2.50 
  18  -3   1   -0.60    2.60 
  18   3   1    1.40    3.20 
 -18   3  -1    1.10    2.90 
 -18   3  -1    4.40    2.30 
  19  -3   1   -3.80    3.60 
 -19  -3  -1    2.30    2.30 
 -19  -3  -1   -0.80    3.00 
 -19  -3  -1    4.10    2.50 
 -19   3  -1    2.50    2.30 
 -19   3  -1    0.80    4.00 
  19   3   1    2.00    3.30 
 -19  -4   1   11.80    3.20 
 -19  -4   1   11.30    3.60 
 -19  -4   1   17.00    3.10 
  19  -4  -1   18.20    2.90 
  19   4  -1   10.50    3.90 
 -19   4   1   21.10    6.00 
 -18  -4   1  176.38   12.80 
 -18  -4   1  125.39   12.70 
 -18  -4   1  139.89   13.10 
  18  -4  -1  180.68   12.60 
  18  -4  -1  133.69   12.80 
 -18   4   1  119.49   13.00 
  18   4  -1  176.88   13.70 
 -18   4   1  171.78   12.10 
 -17  -4   1    3.10    3.00 
  17  -4  -1    4.70    3.00 
 -17  -4   1    8.50    2.70 
 -17  -4   1    7.80    2.80 
  17  -4  -1    7.00    2.70 
 -17   4   1    3.00    3.10 
  17   4  -1    9.00    3.80 
 -17   4   1    5.70    2.00 
  16  -4  -1   33.50    4.50 
 -16  -4   1   27.30    4.10 
 -16  -4   1   32.00    4.40 
 -16  -4   1   27.50    4.40 
  16  -4  -1   30.60    3.90 
  16   4  -1   32.40    4.90 
 -16   4   1   30.10    4.40 
 -16   4   1   32.20    4.00 
 -15  -4   1   77.19    8.20 
 -15  -4   1   70.39    7.90 
 -15  -4   1   99.59    7.90 
  15  -4  -1   72.39    8.30 
  15  -4  -1   88.59    7.70 
 -15   4   1   80.49    8.30 
  15   4  -1   89.59    8.80 
 -15   4   1   89.49    7.30 
  14  -4  -1   89.09    9.70 
 -14  -4   1   91.09    9.20 
 -14  -4   1  110.49    9.10 
  14  -4  -1   95.39    8.90 
 -14  -4   1   92.49    9.00 
  14   4  -1  125.49   10.00 
 -14   4   1  120.29    8.60 
 -14   4   1   91.29    9.80 
  13  -4  -1   93.69    7.80 
 -13  -4   1   68.79    7.90 
 -13  -4   1   78.89    7.90 
 -13  -4   1   89.49    7.80 
 -13   4   1   96.29    7.40 
 -13   4   1   76.59    8.00 
  13   4  -1   91.49    8.70 
 -12  -4   1   15.50    3.00 
 -12  -4   1   26.50    3.20 
  12  -4  -1   25.90    3.30 
 -12  -4   1   25.60    3.50 
 -12   4   1   21.70    3.50 
 -12   4   1   17.60    3.20 
  12   4  -1   26.90    3.90 
 -11  -4   1  777.32   61.49 
 -11  -4   1  802.92   61.49 
  11  -4  -1  818.52   61.29 
 -11  -4   1  891.61   61.49 
  11   4  -1  743.23   61.69 
 -11   4   1  819.12   61.49 
 -11   4   1  911.91   61.19 
 -11   4   1  864.31   61.59 
  10  -4  -1   57.39    5.40 
 -10  -4   1   51.39    5.40 
 -10  -4   1   54.89    5.20 
 -10  -4   1   52.29    5.40 
  10   4  -1   36.40    5.10 
 -10   4   1   52.59    4.80 
 -10   4   1   54.99    5.80 
 -10   4   1   57.79    5.50 
   9  -4  -1 1469.15  106.19 
  -9  -4   1 1591.24  106.29 
  -9  -4   1 1415.76  106.29 
  -9  -4   1 1506.85  105.59 
  -9  -4   1 1410.06  106.19 
   9   4  -1 1470.25  105.59 
  -9   4   1 1444.76  105.99 
   9   4  -1 1212.48  106.29 
  -9   4   1 1439.06  106.39 
  -9   4   1 1475.15  106.29 
   8  -4  -1   19.30    3.00 
  -8  -4   1   22.10    2.60 
  -8  -4   1   15.80    1.70 
  -8  -4   1   19.90    2.70 
  -8  -4   1   20.70    2.80 
   8   4  -1   14.80    2.80 
  -8   4   1   22.80    3.00 
  -8   4   1   21.90    2.00 
  -8   4   1   23.70    2.70 
   8   4  -1   20.20    1.90 
  -8   4   1   17.60    1.90 
  -8   4   1   15.30    2.10 
  -7  -4   1  455.05   33.50 
  -7  -4   1  446.76   33.90 
  -7  -4   1  443.06   33.80 
  -7  -4   1  447.16   33.80 
   7  -4  -1  440.06   33.80 
  -7   4   1  476.15   33.80 
   7   4  -1  435.96   34.00 
  -7   4   1  502.35   33.40 
  -7   4   1  453.85   33.90 
  -7   4   1  444.06   33.40 
   7   4  -1  446.16   33.40 
  -6  -4   1   53.19    4.50 
  -6  -4   1   64.59    5.10 
  -6  -4   1   57.89    5.20 
  -6  -4   1   58.89    5.40 
  -6   4   1   60.29    5.30 
  -6   4   1   61.89    4.60 
  -6   4   1   51.39    4.70 
   6   4  -1   61.49    4.70 
  -6   4   1   57.49    5.10 
  -6   4   1   62.49    4.60 
   6   4  -1   57.69    5.50 
   5  -4  -1 2039.10  147.89 
  -5  -4   1 1850.81  147.69 
  -5  -4   1 2020.50  148.09 
  -5  -4   1 2069.29  147.89 
  -5  -4   1 1963.10  148.09 
   5  -4  -1 2093.79  147.69 
   5   4  -1 2124.39  147.99 
  -5   4   1 1796.62  147.99 
  -5   4   1 2129.49  147.89 
  -5   4   1 2136.99  147.89 
  -5   4   1 2076.19  147.69 
   5   4  -1 1937.81  147.69 
   4  -4  -1  254.07   19.60 
   4  -4  -1  257.47   19.60 
  -4  -4   1  265.57   20.00 
  -4  -4   1  263.17   19.70 
  -4  -4   1  258.47   19.90 
   4  -4  -1  292.77   19.60 
  -4  -4   1  242.08   19.60 
  -4  -4   1  249.48   19.50 
   4  -4  -1  274.87   19.70 
   4   4  -1  259.17   19.70 
   4   4  -1  279.67   19.80 
  -4   4   1  230.98   19.80 
  -4   4   1  274.97   19.70 
   4   4  -1  254.27   19.60 
  -4   4   1  292.27   19.70 
  -4   4   1  288.97   19.80 
  -3  -4   1  187.78   15.60 
  -3  -4   1  199.68   15.60 
  -3  -4   1  198.18   15.20 
   3  -4  -1  216.08   15.40 
   3  -4  -1  188.68   15.30 
  -3  -4   1  199.38   15.30 
   3  -4  -1  223.58   15.30 
  -3  -4   1  197.78   15.30 
   3   4  -1  196.98   15.30 
  -3   4   1  210.08   15.20 
  -3   4   1  209.48   15.40 
  -3   4   1  226.68   15.40 
   3   4  -1  213.98   15.30 
   2  -4  -1  149.88   11.10 
  -2  -4   1  147.59   11.10 
  -2  -4   1  146.89   11.30 
  -2  -4   1  142.89   10.90 
   2  -4  -1  150.68   11.20 
  -2  -4   1  140.39   10.90 
   2  -4  -1  144.19   10.90 
   2   4  -1  162.68   11.00 
   2   4  -1  149.99   10.90 
  -2   4   1  149.09   11.20 
   2   4  -1  143.29   11.10 
  -2   4   1  153.58   10.90 
  -2   4   1  142.39   11.10 
   2   4  -1  148.69   11.10 
   2   4  -1  144.39   11.20 
  -2   4   1  121.79   11.20 
  -2   4   1  156.18   11.10 
   1  -4  -1  258.17   18.20 
  -1  -4   1  232.38   17.80 
  -1  -4   1  248.48   17.90 
   1  -4  -1  258.07   18.30 
  -1  -4   1  244.48   18.10 
  -1  -4   1  238.08   18.20 
  -1  -4   1  257.17   18.40 
   1   4  -1  245.78   17.80 
   1   4  -1  224.68   18.20 
   1   4  -1  230.08   18.10 
  -1   4   1  240.78   18.10 
   1   4  -1  248.98   17.80 
   1   4  -1  258.87   18.10 
  -1   4   1  213.78   18.10 
  -1   4   1  248.48   18.20 
   0  -4   1 3238.58  250.07 
   0  -4   1 3699.43  250.27 
   0  -4  -1 3501.65  250.27 
   0  -4  -1 3573.64  249.88 
   0  -4   1 3454.25  249.78 
   0  -4  -1 2927.91  250.07 
   0  -4   1 3120.59  250.07 
   0  -4  -1 3286.47  250.07 
   0   4   1 3072.79  250.07 
   0   4  -1 3887.51  249.97 
   0   4  -1 3194.58  250.07 
   0   4   1 3684.63  249.97 
   0   4   1 3813.22  250.17 
  -1  -4  -1   10.70    2.10 
   1  -4   1    7.30    1.00 
  -1   4  -1    8.10    1.10 
  -1   4  -1    4.30    0.90 
   1   4   1    4.30    1.00 
   1   4   1    8.00    1.30 
   1   4   1    8.30    1.20 
  -1   4  -1    5.20    1.00 
   1   4   1    5.40    0.70 
   2  -4   1 2242.58  172.68 
   2  -4   1 2203.68  172.38 
  -2  -4  -1 2363.76  172.38 
  -2  -4  -1 2274.17  172.78 
  -2  -4  -1 2325.47  172.48 
   2  -4   1 2528.25  172.68 
   2  -4   1 2565.74  172.48 
  -2  -4  -1 2285.37  172.38 
  -2   4  -1 2660.33  172.48 
   2   4   1 2224.58  172.38 
   2   4   1 2204.68  172.68 
  -2   4  -1 2471.95  172.38 
   2   4   1 2521.65  172.48 
   2   4   1 2235.98  172.48 
  -2   4  -1 2265.27  172.48 
  -3  -4  -1  113.89    8.70 
   3  -4   1  120.39    8.90 
   3  -4   1  127.59    8.60 
  -3  -4  -1  104.79    8.50 
  -3  -4  -1  102.39    8.90 
   3  -4   1  100.69    8.50 
  -3  -4  -1  118.89    9.00 
   3   4   1  108.49    9.00 
   3   4   1  115.69    8.60 
  -3   4  -1  117.79    9.00 
  -3   4  -1  124.19    8.70 
  -3   4  -1  112.39    8.60 
   3   4   1  109.79    8.60 
  -3   4  -1  115.19    8.70 
   3   4   1  119.89    8.80 
  -4  -4  -1 2350.86  185.58 
  -4  -4  -1 2426.96  185.58 
  -4  -4  -1 2572.24  186.08 
   4  -4   1 2883.11  185.58 
  -4  -4  -1 2587.94  185.78 
   4  -4   1 2365.46  185.68 
   4   4   1 2509.95  185.68 
  -4   4  -1 2216.28  185.68 
   4   4   1 2701.13  185.88 
  -4   4  -1 2628.64  185.78 
  -4   4  -1 2498.15  185.88 
  -4   4  -1 2545.35  185.58 
  -4   4  -1 2721.63  185.78 
  -5  -4  -1   33.80    3.10 
  -5  -4  -1   30.50    3.40 
  -5  -4  -1   27.20    2.30 
  -5  -4  -1   26.90    2.40 
  -5  -4  -1   27.70    3.20 
   5   4   1   32.10    3.40 
  -5   4  -1   27.40    2.80 
  -5   4  -1   20.30    2.80 
  -5   4  -1   31.90    3.10 
   5   4   1   31.10    2.50 
  -5   4  -1   30.20    3.00 
  -6  -4  -1  263.27   18.60 
  -6  -4  -1  263.87   18.40 
  -6  -4  -1  231.78   17.80 
  -6  -4  -1  217.88   17.80 
  -6  -4  -1  246.78   18.40 
  -6   4  -1  277.67   18.40 
   6   4   1  256.77   18.90 
  -6   4  -1  249.88   18.40 
   6   4   1  230.08   17.90 
  -6   4  -1  240.68   18.40 
  -6   4  -1  212.18   18.10 
  -7  -4  -1    8.40    1.80 
  -7   4  -1    7.90    2.10 
  -7   4  -1   14.70    2.00 
  -7   4  -1   10.60    1.90 
  -7   4  -1    8.60    1.70 
   7   4   1   10.00    2.20 
  -8  -4  -1   51.99    5.00 
  -8  -4  -1   53.59    5.00 
  -8  -4  -1   52.69    5.10 
  -8   4  -1   45.50    4.60 
  -8   4  -1   47.20    4.90 
   8   4   1   45.60    5.40 
  -8   4  -1   53.29    5.30 
  -9  -4  -1 1468.65   99.99 
  -9  -4  -1 1376.66   99.89 
   9  -4   1 1390.16   99.79 
  -9  -4  -1 1391.66   99.99 
   9   4   1 1138.39   99.99 
  -9   4  -1 1317.27   99.79 
  -9   4  -1 1411.76   99.89 
  -9   4  -1 1362.56   99.99 
 -10  -4  -1   34.50    3.50 
  10  -4   1   21.70    3.00 
 -10  -4  -1   22.90    3.20 
 -10  -4  -1   19.30    3.00 
  10   4   1   15.10    3.20 
 -10   4  -1   18.30    3.00 
 -10   4  -1   22.60    3.40 
 -11  -4  -1  371.66   28.80 
  11  -4   1  377.56   28.60 
 -11  -4  -1  366.56   28.80 
 -11  -4  -1  412.96   28.80 
 -11   4  -1  377.26   28.80 
  11   4   1  341.87   28.90 
 -11   4  -1  363.36   28.80 
 -11   4  -1  424.26   28.70 
 -12  -4  -1   10.90    2.70 
  12  -4   1   10.10    2.40 
 -12  -4  -1    7.60    2.40 
 -12  -4  -1   10.80    2.70 
 -12   4  -1   12.70    2.80 
 -12   4  -1    7.70    2.30 
  12   4   1    5.40    2.90 
 -13  -4  -1  766.52   61.29 
  13  -4   1  857.71   60.99 
 -13  -4  -1  795.02   61.29 
  13  -4   1  756.12   61.49 
 -13  -4  -1  928.11   61.39 
  13   4   1  892.01   62.19 
 -13   4  -1  786.92   61.29 
 -14  -4  -1   45.50    5.60 
 -14  -4  -1   38.20    5.00 
 -14  -4  -1   38.90    5.00 
  14  -4   1   47.20    5.10 
  14  -4   1   44.20    5.30 
 -14   4  -1   59.39    5.30 
 -14   4  -1   41.40    5.20 
  14   4   1   43.80    5.40 
  15  -4   1  334.17   23.70 
  15  -4   1  281.37   24.00 
 -15  -4  -1  278.07   23.90 
 -15  -4  -1  345.57   24.00 
 -15  -4  -1  290.47   24.00 
 -15   4  -1  288.27   24.10 
  15   4   1  367.96   24.60 
  16  -4   1   43.60    5.00 
  16  -4   1   38.00    4.80 
 -16  -4  -1   35.80    4.90 
 -16  -4  -1   35.70    4.70 
 -16  -4  -1   43.90    5.40 
  16   4   1   49.10    5.50 
 -16   4  -1   37.10    5.10 
 -16   4  -1   48.30    5.00 
 -17  -4  -1   21.30    3.90 
  17  -4   1   18.80    3.60 
 -17  -4  -1   23.20    3.60 
  17  -4   1   23.70    3.40 
 -17  -4  -1   20.40    3.60 
 -17   4  -1   15.80    3.80 
 -17   4  -1   28.60    3.30 
  17   4   1   22.50    4.30 
 -18  -4  -1   34.70    5.00 
  18  -4   1   54.79    5.20 
 -18  -4  -1   43.70    4.90 
  18  -4   1   39.00    5.00 
 -18  -4  -1   37.90    4.80 
 -18   4  -1   52.09    5.00 
 -18   4  -1   32.10    4.90 
  18   4   1   51.59    5.80 
 -19  -4  -1   50.49    5.50 
 -19  -4  -1   29.70    4.70 
 -19  -4  -1   32.80    4.30 
  19  -4   1   35.60    4.90 
 -19   4  -1   35.70    5.00 
  19   4   1   41.60    5.20 
 -19  -5   1   -3.00    2.70 
  19  -5  -1    4.80    2.90 
 -19  -5   1    4.00    2.70 
 -19  -5   1    0.10    3.00 
  19  -5  -1    6.30    2.70 
 -19   5   1    5.20    4.10 
  19   5  -1   -1.20    3.50 
  18  -5  -1   40.50    4.40 
 -18  -5   1   43.20    4.50 
 -18  -5   1   31.40    4.70 
  18  -5  -1   32.50    4.60 
 -18  -5   1   21.20    4.20 
 -18   5   1   34.50    4.80 
  18   5  -1   43.00    5.30 
 -17  -5   1    2.30    2.70 
 -17  -5   1    4.90    2.60 
 -17  -5   1    7.00    3.10 
  17  -5  -1    4.40    2.60 
  17  -5  -1    2.70    2.90 
  17   5  -1    0.60    3.50 
 -17   5   1    6.10    1.90 
 -17   5   1    4.70    3.00 
 -16  -5   1   40.50    5.20 
  16  -5  -1   43.90    5.60 
 -16  -5   1   56.29    5.90 
 -16  -5   1   40.80    5.10 
  16  -5  -1   47.50    5.10 
 -16   5   1   47.60    4.60 
 -16   5   1   42.40    5.30 
  16   5  -1   47.70    6.10 
 -15  -5   1    2.70    2.50 
  15  -5  -1    4.30    3.20 
  15  -5  -1    1.00    2.50 
 -15  -5   1    1.90    2.70 
 -15  -5   1    3.80    2.70 
 -15   5   1    3.60    1.80 
  15   5  -1    4.00    3.50 
 -15   5   1    1.40    2.70 
 -14  -5   1    3.60    2.60 
 -14  -5   1    1.70    2.50 
  14  -5  -1    4.40    2.50 
 -14  -5   1    2.60    2.50 
 -14   5   1    5.40    2.80 
 -14   5   1    2.90    1.70 
  14   5  -1    4.80    3.40 
 -13  -5   1   41.10    4.80 
  13  -5  -1   33.40    4.10 
 -13  -5   1   35.10    4.30 
 -13  -5   1   28.50    4.00 
 -13   5   1   28.10    4.10 
 -13   5   1   35.20    3.80 
  13   5  -1   43.40    5.20 
 -13   5   1   29.80    4.20 
 -12  -5   1   13.30    2.90 
 -12  -5   1   17.30    3.20 
 -12  -5   1   14.90    2.90 
  12  -5  -1   22.30    3.20 
 -12   5   1   19.10    2.40 
  12   5  -1   14.40    3.70 
 -12   5   1   17.70    3.30 
 -12   5   1   19.50    3.20 
  11  -5  -1   57.39    5.80 
 -11  -5   1   50.09    5.70 
 -11  -5   1   53.69    5.80 
 -11  -5   1   55.79    5.60 
 -11   5   1   55.99    5.00 
 -11   5   1   58.09    5.80 
  11   5  -1   54.49    6.00 
 -11   5   1   52.69    5.80 
 -10  -5   1   61.09    6.30 
  10  -5  -1   64.59    6.20 
 -10  -5   1   66.59    6.20 
 -10  -5   1   62.89    6.00 
  10   5  -1   63.29    6.80 
 -10   5   1   67.69    5.50 
 -10   5   1   64.09    6.20 
 -10   5   1   58.89    6.60 
  -9  -5   1  272.87   19.90 
  -9  -5   1  234.88   19.20 
   9  -5  -1  275.77   20.00 
  -9  -5   1  261.27   19.90 
  -9  -5   1  253.77   20.10 
  -9   5   1  262.67   19.50 
   9   5  -1  240.08   20.20 
  -9   5   1  260.87   20.10 
   9   5  -1  268.47   19.30 
  -9   5   1  279.67   20.00 
  -8  -5   1   95.29    7.90 
  -8  -5   1   92.29    7.80 
  -8  -5   1   93.69    7.20 
   8  -5  -1   93.69    8.00 
  -8  -5   1   94.99    8.10 
  -8   5   1   88.09    8.00 
  -8   5   1   95.39    7.80 
   8   5  -1   93.59    7.10 
  -7  -5   1    2.10    1.70 
  -7  -5   1    0.60    0.60 
  -7  -5   1    2.20    1.40 
  -7  -5   1    1.70    0.70 
  -7  -5   1   -0.40    1.40 
   7   5  -1    1.00    0.90 
  -7   5   1    1.00    0.90 
  -7   5   1   -0.10    0.80 
  -7   5   1    1.50    1.60 
  -7   5   1    0.80    1.40 
   7   5  -1    0.20    1.70 
  -6  -5   1   90.19    7.70 
  -6  -5   1   74.29    6.80 
   6  -5  -1   92.09    7.20 
  -6  -5   1   89.59    7.30 
  -6  -5   1   82.99    6.80 
  -6  -5   1   85.49    7.50 
   6   5  -1   89.99    7.60 
  -6   5   1  101.39    7.00 
   6   5  -1   89.59    7.00 
  -6   5   1   78.59    7.80 
  -6   5   1  100.59    7.30 
  -6   5   1   97.99    6.90 
  -6   5   1   94.89    7.40 
  -5  -5   1  174.88   13.50 
   5  -5  -1  186.18   13.00 
  -5  -5   1  169.38   13.40 
  -5  -5   1  173.38   13.10 
  -5  -5   1  163.78   12.90 
  -5  -5   1  147.59   12.90 
   5  -5  -1  173.68   13.20 
  -5   5   1  185.68   13.00 
  -5   5   1  152.98   13.30 
  -5   5   1  185.08   13.20 
   5   5  -1  168.28   13.00 
  -5   5   1  191.48   13.10 
   5   5  -1  177.68   13.40 
  -4  -5   1   24.60    2.40 
  -4  -5   1   24.70    2.60 
  -4  -5   1   25.50    3.20 
   4  -5  -1   23.10    2.80 
  -4  -5   1   18.00    2.70 
  -4  -5   1   23.90    2.30 
   4  -5  -1   30.10    2.50 
   4  -5  -1   28.90    2.40 
   4   5  -1   27.10    2.50 
  -4   5   1   25.20    2.60 
  -4   5   1   26.90    2.80 
  -4   5   1   27.00    2.50 
   4   5  -1   24.30    2.60 
   4   5  -1   24.30    3.00 
  -4   5   1   25.70    3.10 
   4   5  -1   26.10    3.00 
  -3  -5   1   56.19    4.70 
   3  -5  -1   60.69    4.80 
  -3  -5   1   54.49    5.30 
  -3  -5   1   57.49    5.30 
   3  -5  -1   60.39    5.10 
   3  -5  -1   63.49    4.70 
  -3  -5   1   55.19    4.70 
   3   5  -1   63.69    5.00 
  -3   5   1   47.50    5.10 
  -3   5   1   59.69    4.70 
   3   5  -1   61.69    5.20 
   3   5  -1   68.89    4.80 
   3   5  -1   53.99    4.90 
  -3   5   1   60.29    5.00 
  -3   5   1   67.79    5.00 
  -2  -5   1   41.60    3.40 
   2  -5  -1   39.50    4.00 
   2  -5  -1   44.00    3.80 
  -2  -5   1   38.10    4.00 
  -2  -5   1   44.00    3.50 
  -2  -5   1   41.00    4.20 
   2  -5  -1   40.40    3.30 
  -2   5   1   41.70    3.80 
   2   5  -1   43.80    3.90 
   2   5  -1   48.00    3.50 
   2   5  -1   48.00    3.80 
   2   5  -1   41.40    3.90 
   2   5  -1   49.10    3.40 
  -2   5   1   36.00    3.90 
   1  -5  -1  141.39   10.70 
   1  -5  -1  147.59   10.50 
  -1  -5   1  144.19   10.20 
   1  -5  -1  140.09   10.10 
  -1  -5   1  131.59   10.60 
   1   5  -1  130.19   10.50 
   1   5  -1  124.89   10.50 
  -1   5   1  139.99   10.40 
   1   5  -1  146.79   10.40 
  -1   5   1  118.39   10.50 
  -1   5   1  133.59   10.50 
   0  -5   1   58.49    4.20 
   0  -5   1   53.69    4.80 
   0  -5  -1   56.59    4.30 
   0  -5  -1   57.09    4.80 
   0  -5  -1   54.79    5.00 
   0   5  -1   59.19    4.60 
   0   5   1   61.89    4.60 
   0   5   1   49.99    4.70 
   0   5   1   53.79    4.80 
   0   5  -1   47.70    4.80 
   1  -5   1   27.60    3.20 
   1  -5   1   30.50    2.90 
  -1  -5  -1   27.90    2.50 
  -1  -5  -1   29.90    3.30 
  -1   5  -1   25.00    2.70 
  -1   5  -1   25.60    3.10 
   1   5   1   24.90    2.90 
   1   5   1   30.60    2.80 
   1   5   1   29.50    2.30 
   1   5   1   31.40    2.30 
   1   5   1   25.40    3.00 
  -1   5  -1   30.70    2.70 
   1   5   1   29.40    2.20 
   2  -5   1    9.40    1.70 
   2  -5   1    9.70    1.40 
  -2  -5  -1    9.50    1.50 
  -2  -5  -1    9.00    1.10 
  -2  -5  -1    9.60    1.10 
  -2  -5  -1    8.70    1.80 
   2  -5   1    8.10    1.00 
  -2  -5  -1    6.60    1.50 
   2   5   1    8.70    1.00 
   2   5   1    6.00    1.40 
  -2   5  -1    9.90    1.80 
   2   5   1    7.80    1.40 
  -2   5  -1    9.00    1.30 
  -2   5  -1    7.90    1.30 
   2   5   1    8.00    1.30 
  -2   5  -1   10.30    1.10 
  -3  -5  -1  235.28   18.00 
   3  -5   1  241.38   17.80 
  -3  -5  -1  242.18   17.60 
   3  -5   1  246.38   17.50 
  -3  -5  -1  226.48   17.90 
  -3  -5  -1  246.08   17.60 
  -3  -5  -1  226.88   17.50 
   3   5   1  227.18   17.60 
   3   5   1  215.08   17.90 
   3   5   1  230.18   17.50 
  -3   5  -1  245.88   17.50 
  -3   5  -1  243.68   17.60 
  -3   5  -1  230.18   17.50 
   3   5   1  249.38   17.70 
  -3   5  -1  229.18   17.90 
   4  -5   1   24.30    2.80 
  -4  -5  -1   20.10    2.20 
  -4  -5  -1   23.30    2.50 
  -4  -5  -1   21.30    2.10 
   4  -5   1   25.60    2.10 
  -4  -5  -1   22.30    2.70 
   4  -5   1   18.20    2.10 
  -4  -5  -1   23.70    2.70 
  -4   5  -1   24.60    2.80 
  -4   5  -1   24.60    2.40 
  -4   5  -1   24.60    2.60 
   4   5   1   20.60    2.30 
   4   5   1   18.80    2.30 
  -4   5  -1   22.80    2.10 
  -5  -5  -1   13.60    1.60 
  -5  -5  -1   10.70    2.20 
  -5  -5  -1   19.00    2.70 
  -5  -5  -1   15.30    1.60 
  -5  -5  -1   15.10    2.00 
   5  -5   1   14.20    2.00 
   5   5   1   15.20    2.50 
   5   5   1   14.70    1.80 
  -5   5  -1   13.20    2.10 
  -5   5  -1   17.90    2.10 
  -5   5  -1   13.30    1.80 
  -6  -5  -1    1.50    1.60 
  -6  -5  -1    1.90    0.70 
  -6  -5  -1    1.60    0.70 
  -6  -5  -1    3.10    1.90 
  -6  -5  -1    2.10    1.40 
   6   5   1    2.30    1.70 
  -6   5  -1    3.40    1.60 
  -6   5  -1    1.00    1.10 
   6   5   1    2.50    0.80 
  -6   5  -1    2.70    1.40 
  -6   5  -1    3.70    1.90 
  -7  -5  -1   18.30    1.70 
  -7  -5  -1   15.20    2.50 
  -7  -5  -1   18.10    1.60 
  -7   5  -1   15.10    2.50 
  -7   5  -1   22.50    2.60 
   7   5   1   19.90    1.80 
  -7   5  -1   16.90    2.20 
  -7   5  -1   20.50    2.70 
   7   5   1   19.10    2.80 
  -8  -5  -1   -0.20    1.80 
  -8  -5  -1    3.70    1.80 
  -8  -5  -1    3.20    1.80 
  -8   5  -1    0.80    1.30 
  -8   5  -1    0.90    1.70 
   8   5   1    5.20    2.30 
  -8   5  -1    0.30    1.80 
  -8   5  -1    0.10    1.80 
  -9  -5  -1  106.99    8.70 
  -9  -5  -1  104.39    8.90 
  -9  -5  -1  106.29    8.70 
  -9   5  -1   96.49    8.30 
  -9   5  -1  119.99    8.80 
  -9   5  -1   93.59    8.90 
   9   5   1   90.69    9.10 
 -10  -5  -1   36.50    4.30 
 -10  -5  -1   42.80    4.50 
 -10  -5  -1   37.80    4.10 
  10  -5   1   37.40    4.10 
 -10   5  -1   37.20    4.00 
 -10   5  -1   29.50    4.10 
  10   5   1   29.40    4.10 
 -10   5  -1   32.60    3.90 
 -11  -5  -1   20.30    3.10 
 -11  -5  -1   16.80    3.10 
  11  -5   1   26.10    3.30 
 -11  -5  -1   22.90    3.40 
  11   5   1   19.00    3.40 
 -11   5  -1   22.30    2.90 
 -11   5  -1   19.50    3.30 
 -11   5  -1   19.60    3.10 
 -12  -5  -1  141.29   11.80 
 -12  -5  -1  133.19   11.80 
  12  -5   1  144.59   11.60 
 -12  -5  -1  153.38   11.80 
 -12   5  -1  155.78   11.50 
 -12   5  -1  146.19   11.90 
 -12   5  -1  141.99   11.80 
  12   5   1  113.39   12.10 
 -13  -5  -1   22.70    3.50 
 -13  -5  -1   17.80    3.40 
  13  -5   1   23.30    3.30 
  13   5   1   19.90    4.10 
 -13   5  -1   16.10    3.30 
 -13   5  -1   21.20    3.00 
 -14  -5  -1  140.29   12.10 
  14  -5   1  136.99   12.50 
 -14  -5  -1  126.89   12.00 
 -14  -5  -1  151.78   12.10 
  14  -5   1  153.18   11.80 
 -14   5  -1  135.49   12.10 
 -14   5  -1  160.48   11.60 
  14   5   1  137.69   12.60 
 -15  -5  -1    9.00    2.80 
  15  -5   1    8.60    2.60 
  15  -5   1    7.30    3.10 
 -15  -5  -1    2.70    2.70 
 -15  -5  -1    7.80    2.90 
  15   5   1    8.30    3.50 
 -15   5  -1    4.70    2.90 
 -15   5  -1    8.60    2.40 
  16  -5   1   20.40    3.90 
 -16  -5  -1   25.20    4.10 
 -16  -5  -1   29.50    4.10 
  16  -5   1   33.30    3.80 
 -16  -5  -1   25.00    3.90 
 -16   5  -1   29.20    4.30 
  16   5   1   26.50    4.40 
 -16   5  -1   32.70    3.60 
  17  -5   1   47.70    5.20 
 -17  -5  -1   35.20    4.70 
 -17  -5  -1   33.20    4.90 
  17  -5   1   41.30    4.80 
 -17  -5  -1   42.50    4.80 
 -17   5  -1   37.30    5.00 
  17   5   1   45.40    5.70 
 -17   5  -1   40.50    4.60 
  18  -5   1    1.60    2.70 
 -18  -5  -1    2.90    2.80 
 -18  -5  -1    0.10    2.50 
 -18  -5  -1   -0.80    2.90 
  18  -5   1    1.20    2.70 
  18   5   1   -1.30    3.40 
 -18   5  -1    4.50    2.00 
 -18   5  -1    0.10    2.90 
 -19  -5  -1   -0.60    2.40 
  18  -6  -1  417.86   26.40 
 -18  -6   1  344.67   26.50 
  18  -6  -1  305.27   26.50 
 -18  -6   1  334.57   26.50 
 -18   6   1  309.97   26.40 
 -17  -6   1   14.40    3.20 
 -17  -6   1   11.80    3.20 
 -17  -6   1    9.40    3.30 
  17  -6  -1   12.10    3.10 
  17  -6  -1    8.40    2.40 
  17  -6  -1   15.50    3.70 
  17   6  -1   14.90    4.30 
 -17   6   1    8.60    3.10 
 -16  -6   1  151.38   13.40 
  16  -6  -1  172.78   13.90 
 -16  -6   1  150.48   13.40 
  16  -6  -1  150.68   14.00 
 -16  -6   1  191.18   13.50 
  16  -6  -1  143.69   12.70 
 -16   6   1  153.48   13.40 
  16   6  -1  191.68   14.40 
 -15  -6   1   33.10    4.40 
 -15  -6   1   38.80    4.50 
  15  -6  -1   39.30    4.50 
 -15  -6   1   26.90    4.40 
  15   6  -1   37.90    5.40 
 -15   6   1   29.50    4.40 
  14  -6  -1  132.89   10.70 
 -14  -6   1  131.39   10.60 
 -14  -6   1  120.79   10.70 
 -14  -6   1  118.79   10.80 
  14   6  -1  116.99   11.40 
 -14   6   1  113.69   10.60 
 -14   6   1  125.39   10.70 
 -13  -6   1   33.60    4.10 
 -13  -6   1   31.90    4.40 
 -13  -6   1   41.90    4.80 
  13  -6  -1   29.80    4.10 
 -13   6   1   30.10    4.00 
  13   6  -1   23.70    4.60 
 -13   6   1   29.40    4.10 
  12  -6  -1  121.29   10.70 
 -12  -6   1  128.99   10.90 
 -12  -6   1  130.89   10.70 
 -12  -6   1  138.89   10.70 
 -12   6   1  123.39   11.00 
  12   6  -1  106.69   11.20 
 -12   6   1  135.49   10.80 
 -11  -6   1  254.77   18.90 
 -11  -6   1  244.38   19.00 
 -11  -6   1  243.38   18.80 
  11  -6  -1  246.18   18.90 
 -11   6   1  230.28   19.10 
  11   6  -1  221.58   19.20 
 -11   6   1  255.17   18.90 
 -10  -6   1  139.49   11.40 
  10  -6  -1  135.29   11.20 
 -10  -6   1  147.69   11.70 
 -10  -6   1  138.89   11.40 
  10  -6  -1  133.19   11.60 
  10   6  -1  135.69   12.00 
 -10   6   1  158.48   11.50 
 -10   6   1  143.49   11.80 
  -9  -6   1  439.76   33.20 
   9  -6  -1  430.46   33.00 
   9  -6  -1  442.96   32.80 
  -9  -6   1  413.36   32.40 
  -9  -6   1  441.66   32.90 
  -9  -6   1  428.06   32.90 
  -9   6   1  448.86   33.10 
   9   6  -1  433.96   33.20 
   9   6  -1  429.36   32.30 
  -9   6   1  494.05   33.00 
  -8  -6   1  228.08   17.10 
   8  -6  -1  219.98   16.80 
  -8  -6   1  230.08   17.30 
  -8  -6   1  223.38   16.90 
   8  -6  -1  222.88   17.20 
  -8  -6   1  204.18   16.40 
  -8  -6   1  185.28   16.30 
  -8   6   1  232.18   17.10 
   8   6  -1  241.08   17.30 
  -8   6   1  250.37   17.00 
   8   6  -1  217.98   16.50 
  -7  -6   1   42.40    4.50 
  -7  -6   1   37.50    3.60 
   7  -6  -1   42.10    4.20 
  -7  -6   1   43.50    4.30 
  -7  -6   1   37.50    3.50 
   7   6  -1   42.90    3.80 
  -7   6   1   49.80    4.30 
  -7   6   1   44.80    3.70 
   7   6  -1   43.40    4.90 
  -7   6   1   44.20    4.50 
  -7   6   1   48.10    3.60 
  -6  -6   1  122.59   10.10 
   6  -6  -1  123.79    9.90 
  -6  -6   1  112.19    9.80 
  -6  -6   1  120.09    9.80 
   6   6  -1  135.99   10.20 
  -6   6   1  120.29    9.90 
  -6   6   1  126.29    9.80 
  -6   6   1  137.59    9.60 
  -6   6   1  122.79   10.10 
   6   6  -1  123.89    9.60 
  -5  -6   1  292.37   21.80 
  -5  -6   1  283.67   21.60 
  -5  -6   1  290.17   22.30 
  -5  -6   1  277.97   22.20 
   5  -6  -1  294.17   22.00 
  -5   6   1  301.37   21.80 
  -5   6   1  311.87   21.80 
  -5   6   1  310.57   22.00 
   5   6  -1  300.87   22.00 
   5   6  -1  284.67   21.80 
  -5   6   1  266.97   22.10 
  -4  -6   1  121.99   10.30 
  -4  -6   1  121.59    9.70 
  -4  -6   1  131.29   10.40 
   4  -6  -1  133.89    9.70 
  -4  -6   1  129.69    9.80 
   4  -6  -1  129.89    9.70 
   4  -6  -1  129.09   10.10 
  -4   6   1  133.19    9.90 
   4   6  -1  124.59    9.90 
   4   6  -1  119.99   10.10 
  -4   6   1  120.89   10.20 
  -4   6   1  132.59    9.70 
   3  -6  -1   19.40    1.90 
  -3  -6   1   15.90    2.00 
   3  -6  -1   20.80    2.50 
   3  -6  -1   23.20    2.40 
  -3  -6   1   21.80    2.20 
  -3   6   1   18.30    2.50 
   3   6  -1   26.90    2.20 
   3   6  -1   18.00    2.40 
  -3   6   1   22.70    2.50 
   3   6  -1   20.70    2.40 
  -3   6   1   21.50    2.00 
  -3   6   1   30.30    2.70 
   3   6  -1   18.80    2.40 
   2  -6  -1   73.69    6.00 
  -2  -6   1   73.09    5.70 
  -2  -6   1   75.59    6.50 
   2  -6  -1   76.69    6.40 
  -2  -6   1   77.99    6.30 
  -2  -6   1   69.99    5.60 
   2   6  -1   79.69    5.60 
   2   6  -1   70.59    6.10 
  -2   6   1   74.29    6.00 
   2   6  -1   73.79    6.00 
  -2   6   1   66.49    6.20 
   2   6  -1   68.59    6.10 
  -2   6   1   73.59    5.90 
   2   6  -1   71.09    5.50 
   1  -6  -1  241.78   17.30 
  -1  -6   1  231.18   17.80 
  -1  -6   1  251.27   17.40 
   1  -6  -1  247.68   17.90 
   1  -6  -1  238.08   17.70 
  -1   6   1  238.58   17.70 
  -1   6   1  216.28   17.70 
   1   6  -1  215.48   17.70 
   1   6  -1  245.98   17.60 
   1   6  -1  214.68   17.70 
   0  -6  -1 1320.57   97.29 
   0  -6   1 1368.16   97.49 
   0  -6   1 1294.27   97.29 
   0  -6  -1 1322.97   97.39 
   0  -6  -1 1348.97   96.89 
   0  -6   1 1362.46   96.89 
   0   6   1 1406.66   97.09 
   0   6   1 1288.57   97.29 
   0   6  -1 1411.06   97.09 
   0   6  -1 1212.88   97.29 
   0   6   1 1228.78   97.19 
   1  -6   1  107.69    7.50 
  -1  -6  -1   90.79    7.80 
   1  -6   1   84.39    6.90 
  -1  -6  -1   93.59    7.10 
   1   6   1   85.19    7.40 
   1   6   1   86.29    7.50 
  -1   6  -1   90.99    7.60 
  -1   6  -1   92.59    7.40 
  -1   6  -1   99.89    7.30 
   1   6   1  102.49    7.40 
  -2  -6  -1  684.73   48.90 
   2  -6   1  677.93   49.40 
   2  -6   1  691.53   49.20 
  -2  -6  -1  652.63   49.50 
  -2  -6  -1  655.63   49.00 
   2  -6   1  698.63   48.80 
  -2  -6  -1  658.73   49.40 
   2   6   1  633.64   49.20 
   2   6   1  638.24   49.30 
  -2   6  -1  706.43   49.10 
  -2   6  -1  615.54   49.10 
  -2   6  -1  647.34   49.40 
   2   6   1  691.13   49.10 
   2   6   1  679.33   48.90 
  -3  -6  -1   15.90    1.90 
   3  -6   1   14.00    1.50 
   3  -6   1   15.20    1.90 
  -3  -6  -1   13.50    1.60 
   3  -6   1   15.10    2.20 
  -3  -6  -1   10.00    2.30 
  -3   6  -1   17.80    1.90 
   3   6   1   15.80    1.60 
   3   6   1   14.60    1.90 
   3   6   1   15.80    2.20 
  -3   6  -1   17.50    2.00 
   3   6   1   12.50    1.80 
  -3   6  -1   17.80    1.80 
  -3   6  -1   11.50    2.10 
   4  -6   1 1200.38  100.09 
  -4  -6  -1 1374.46  100.69 
  -4  -6  -1 1372.36  100.29 
   4  -6   1 1363.96  100.49 
  -4  -6  -1 1378.36  100.69 
   4  -6   1 1320.87  100.19 
  -4   6  -1 1309.17  100.19 
  -4   6  -1 1384.96  100.59 
  -4   6  -1 1461.45  100.19 
   4   6   1 1373.76  100.29 
   4   6   1 1424.36  100.39 
  -4   6  -1 1458.95  100.39 
  -5  -6  -1   58.29    5.50 
  -5  -6  -1   66.29    5.10 
  -5  -6  -1   57.79    5.70 
  -5  -6  -1   54.49    4.70 
   5  -6   1   59.89    5.30 
  -5   6  -1   57.69    5.60 
   5   6   1   57.19    4.80 
  -5   6  -1   59.49    5.20 
   5   6   1   56.19    5.40 
  -5   6  -1   58.79    4.70 
  -5   6  -1   61.19    5.00 
  -6  -6  -1  108.99    8.90 
   6  -6   1  106.39    8.70 
  -6  -6  -1   91.89    8.10 
  -6  -6  -1   92.99    8.10 
  -6  -6  -1  112.39    9.10 
  -6  -6  -1  114.79    8.60 
  -6   6  -1  109.19    8.60 
   6   6   1  114.49    8.90 
   6   6   1  112.09    8.20 
  -6   6  -1  119.39    8.60 
  -6   6  -1  111.09    9.00 
   7  -6   1   17.80    2.50 
  -7  -6  -1   15.80    2.50 
  -7  -6  -1   15.00    2.40 
  -7  -6  -1   14.90    2.70 
  -7  -6  -1   13.20    1.50 
  -7  -6  -1   13.80    1.50 
   7   6   1   13.80    2.60 
   7   6   1   19.80    1.90 
  -7   6  -1   14.30    2.40 
  -7   6  -1   15.20    2.20 
  -7   6  -1   18.20    2.70 
  -8  -6  -1   51.99    5.40 
  -8  -6  -1   61.09    5.90 
  -8  -6  -1   56.89    5.40 
  -8  -6  -1   52.29    4.30 
   8   6   1   56.89    4.40 
  -8   6  -1   60.39    5.30 
   8   6   1   55.79    5.90 
  -8   6  -1   55.79    5.60 
  -8   6  -1   52.79    5.60 
  -9  -6  -1  296.77   22.80 
  -9  -6  -1  303.27   22.70 
  -9  -6  -1  298.17   22.60 
   9   6   1  303.07   22.90 
  -9   6  -1  302.07   22.60 
  -9   6  -1  277.27   22.70 
 -10  -6  -1   78.99    7.70 
 -10  -6  -1   93.39    7.60 
 -10  -6  -1   83.19    7.40 
  10  -6   1   80.49    7.50 
  10   6   1   81.59    8.10 
 -10   6  -1   76.69    6.90 
 -10   6  -1   76.59    7.70 
 -10   6  -1   86.49    7.40 
 -11  -6  -1  145.89   11.60 
 -11  -6  -1  141.09   11.80 
 -11  -6  -1  129.29   11.50 
  11  -6   1  141.79   11.60 
  11   6   1  125.59   12.00 
 -11   6  -1  147.59   11.60 
 -11   6  -1  136.89   11.80 
 -11   6  -1  147.79   11.20 
 -12  -6  -1  297.87   22.30 
  12  -6   1  299.17   22.20 
 -12  -6  -1  273.57   22.20 
 -12  -6  -1  298.77   22.50 
  12   6   1  222.28   23.90 
 -12   6  -1  309.17   21.90 
 -12   6  -1  308.17   22.30 
 -12   6  -1  269.87   22.30 
 -13  -6  -1  430.16   30.60 
  13  -6   1  403.96   30.40 
 -13  -6  -1  378.56   30.60 
 -13   6  -1  384.16   30.50 
 -13   6  -1  438.96   30.20 
  13   6   1  385.86   30.90 
 -13   6  -1  387.66   30.50 
 -14  -6  -1  255.97   21.00 
 -14  -6  -1  293.07   21.20 
  14  -6   1  286.87   20.90 
 -14  -6  -1  243.88   21.10 
 -14   6  -1  292.77   20.70 
 -14   6  -1  249.08   21.00 
  14   6   1  268.17   21.60 
 -15  -6  -1  170.98   13.30 
 -15  -6  -1  136.49   13.20 
 -15  -6  -1  151.38   13.30 
  15  -6   1  133.99   13.60 
  15  -6   1  180.18   13.10 
 -15   6  -1  172.08   12.70 
 -15   6  -1  150.78   13.30 
  15   6   1  177.98   14.10 
 -16  -6  -1  150.08   13.30 
 -16  -6  -1  173.78   13.40 
  16  -6   1  148.79   13.60 
 -16  -6  -1  154.18   13.40 
  16   6   1  199.58   14.30 
 -16   6  -1  143.09   13.20 
 -17  -6  -1   21.70    4.00 
 -17  -6  -1   31.40    4.20 
  17  -6   1   26.10    4.20 
 -17  -6  -1   27.40    4.00 
  17  -6   1   30.10    3.90 
 -17   6  -1   22.70    4.10 
  17   6   1   37.10    5.20 
 -18  -6  -1   19.20    4.90 
 -18  -6  -1   24.50    3.80 
  18  -6   1   26.10    3.70 
 -18  -6  -1   18.20    3.80 
  18  -6   1   20.20    3.80 
  18   6   1   23.70    4.70 
 -18   6  -1   25.70    4.10 
 -18  -7   1   82.49    7.40 
  18  -7  -1   85.39    7.50 
 -18  -7   1   52.29    7.50 
 -18  -7   1   58.19    7.40 
 -18   7   1   62.09    7.30 
  18   7  -1   79.69    8.80 
 -17  -7   1   26.80    4.50 
 -17  -7   1   37.30    4.70 
  17  -7  -1   36.70    5.30 
  17  -7  -1   34.60    4.00 
  17  -7  -1   45.20    4.80 
 -17  -7   1   44.00    4.90 
 -17   7   1   33.50    4.60 
  17   7  -1   41.20    5.60 
 -16  -7   1   85.69    8.90 
  16  -7  -1   85.89    8.20 
  16  -7  -1  112.39    9.20 
 -16  -7   1  105.19    9.10 
 -16  -7   1   94.09    9.20 
  16   7  -1   98.39   10.10 
 -16   7   1   96.49    8.90 
 -15  -7   1    1.60    2.70 
 -15  -7   1    1.30    2.60 
  15  -7  -1    0.70    2.70 
 -15  -7   1    3.70    3.00 
  15  -7  -1    1.10    2.00 
  15   7  -1    3.30    3.60 
 -15   7   1    0.70    2.60 
 -15   7   1    2.20    2.60 
 -14  -7   1   15.50    3.60 
 -14  -7   1   20.50    3.50 
 -14  -7   1   17.10    3.30 
  14  -7  -1   16.60    2.80 
  14  -7  -1   21.00    4.10 
  14   7  -1   15.80    3.90 
 -14   7   1   16.70    3.50 
 -14   7   1   16.50    3.20 
 -13  -7   1   60.19    6.50 
  13  -7  -1   46.60    5.50 
 -13  -7   1   53.19    6.00 
  13  -7  -1   52.19    5.40 
 -13  -7   1   49.60    6.20 
 -13   7   1   44.20    5.30 
 -13   7   1   59.69    6.10 
  13   7  -1   58.09    6.40 
 -12  -7   1    0.20    2.50 
 -12  -7   1    2.50    2.30 
  12  -7  -1    2.00    2.50 
 -12  -7   1    1.20    2.20 
  12  -7  -1    1.70    1.90 
  12   7  -1    2.50    2.80 
 -12   7   1    2.20    2.20 
 -12   7   1    1.40    2.80 
 -11  -7   1    1.10    2.20 
 -11  -7   1   -0.50    2.10 
 -11  -7   1    0.60    2.10 
  11  -7  -1    2.70    1.80 
  11  -7  -1   -0.50    2.40 
 -11   7   1   -0.40    2.00 
 -11   7   1    2.60    2.60 
  11   7  -1    3.40    3.00 
 -10  -7   1   19.60    3.00 
  10  -7  -1   23.00    3.40 
 -10  -7   1   21.80    3.40 
 -10  -7   1   15.90    1.80 
 -10  -7   1   15.60    2.80 
  10  -7  -1   17.80    2.70 
 -10   7   1   11.60    3.10 
 -10   7   1   21.30    2.90 
  10   7  -1   16.60    1.90 
  10   7  -1   19.10    3.60 
  -9  -7   1    5.20    1.10 
  -9  -7   1    3.90    2.10 
   9  -7  -1    5.80    2.20 
   9  -7  -1    3.20    2.40 
  -9  -7   1    3.10    2.40 
  -9  -7   1    4.00    0.80 
  -9  -7   1    5.50    2.00 
  -9   7   1    7.60    2.00 
  -9   7   1    2.30    2.20 
   9   7  -1    5.50    1.20 
   9   7  -1    4.70    2.60 
  -8  -7   1    4.20    1.90 
   8  -7  -1    6.80    1.90 
  -8  -7   1    5.70    2.10 
  -8  -7   1    5.30    2.30 
   8   7  -1   11.00    2.60 
  -8   7   1   10.10    2.40 
  -8   7   1    9.60    2.00 
   8   7  -1    6.50    1.30 
  -7  -7   1  102.99    8.10 
  -7  -7   1   86.89    8.00 
  -7  -7   1   84.09    7.10 
   7  -7  -1   93.19    7.70 
   7   7  -1   93.19    8.10 
  -7   7   1   88.19    8.10 
   7   7  -1   89.79    7.30 
  -7   7   1   87.49    7.80 
  -7   7   1  102.59    7.20 
  -7   7   1   96.29    7.60 
  -6  -7   1  155.58   11.90 
  -6  -7   1  151.38   12.80 
  -6  -7   1  160.58   12.70 
  -6  -7   1  158.68   12.30 
   6  -7  -1  152.38   12.40 
  -6   7   1  161.38   12.70 
   6   7  -1  145.19   12.10 
  -6   7   1  165.38   12.40 
   6   7  -1  161.88   12.60 
  -6   7   1  173.08   12.10 
  -6   7   1  163.78   12.20 
  -5  -7   1  606.34   45.40 
  -5  -7   1  600.24   45.50 
  -5  -7   1  620.44   45.90 
   5  -7  -1  624.04   45.80 
  -5  -7   1  616.94   46.00 
  -5   7   1  658.93   45.50 
   5   7  -1  592.54   45.50 
   5   7  -1  622.14   45.70 
  -5   7   1  637.84   45.50 
  -5   7   1  580.44   45.80 
  -5   7   1  627.04   45.60 
   4  -7  -1   10.50    1.30 
  -4  -7   1   11.10    1.60 
  -4  -7   1   10.40    2.20 
   4  -7  -1    9.20    2.00 
   4  -7  -1   12.50    1.60 
  -4  -7   1   10.40    2.20 
  -4  -7   1    8.80    1.50 
  -4   7   1   14.60    1.50 
  -4   7   1   10.00    1.70 
   4   7  -1   10.70    1.80 
   4   7  -1   18.50    1.90 
  -4   7   1    9.60    2.00 
   4   7  -1    8.90    1.90 
   4   7  -1   12.60    2.40 
  -4   7   1   12.00    1.90 
  -3  -7   1   28.00    3.30 
   3  -7  -1   24.30    3.00 
  -3  -7   1   25.90    2.40 
  -3  -7   1   24.20    2.50 
  -3  -7   1   24.10    3.30 
   3  -7  -1   23.50    2.70 
   3  -7  -1   19.40    2.10 
   3   7  -1   25.50    3.10 
   3   7  -1   29.80    2.40 
  -3   7   1   21.60    2.90 
  -3   7   1   26.80    2.20 
   3   7  -1   21.40    2.90 
  -3   7   1   29.10    3.00 
  -3   7   1   26.40    3.00 
  -2  -7   1   24.70    3.00 
  -2  -7   1   16.10    2.50 
  -2  -7   1   16.20    1.90 
   2  -7  -1   18.50    1.60 
   2  -7  -1   18.80    2.70 
   2  -7  -1   22.30    2.50 
  -2   7   1   17.40    2.20 
   2   7  -1   13.80    2.20 
   2   7  -1   11.80    2.20 
  -2   7   1   23.20    2.30 
   2   7  -1   20.50    1.50 
  -2   7   1   15.10    2.30 
   2   7  -1   16.30    2.10 
  -1  -7   1  139.29   10.80 
  -1  -7   1  134.59   10.60 
   1  -7  -1  137.69   10.40 
  -1  -7   1  144.99   10.00 
   1  -7  -1  140.59    9.90 
   1  -7  -1  123.49   10.70 
  -1   7   1  132.09   10.40 
  -1   7   1  135.09   10.50 
   1   7  -1  117.19   10.40 
   1   7  -1  120.19   10.30 
   1   7  -1  122.79   10.40 
   0  -7  -1   47.50    3.70 
   0  -7   1   42.20    4.30 
   0  -7   1   45.50    3.60 
   0  -7  -1   43.00    4.70 
   0  -7  -1   44.90    4.40 
   0   7   1   41.00    4.30 
   0   7  -1   36.70    4.40 
   0   7  -1   45.90    4.00 
   0   7   1   43.10    4.20 
   0   7   1   48.10    4.40 
  -1  -7  -1   47.40    5.50 
   1  -7   1   53.59    4.60 
   1  -7   1   52.89    5.10 
   1  -7   1   51.59    3.80 
  -1  -7  -1   48.90    4.10 
   1   7   1   48.00    4.70 
  -1   7  -1   52.29    4.40 
   1   7   1   54.19    4.40 
  -1   7  -1   40.80    4.80 
  -1   7  -1   46.10    4.40 
   1   7   1   43.20    4.50 
   2  -7   1    1.80    1.20 
  -2  -7  -1    1.20    0.90 
  -2  -7  -1    0.20    1.70 
  -2  -7  -1    1.50    1.60 
   2  -7   1   -0.80    1.50 
   2   7   1   -0.90    1.30 
   2   7   1    0.50    0.50 
   2   7   1    0.70    0.60 
  -2   7  -1    1.30    1.50 
   2   7   1    1.90    1.30 
  -2   7  -1    0.80    1.40 
   2   7   1    0.40    1.30 
  -2   7  -1   -0.30    1.10 
   3  -7   1    8.60    2.10 
  -3  -7  -1   13.30    2.30 
  -3  -7  -1   19.40    3.70 
   3  -7   1   11.30    1.60 
   3  -7   1   11.60    1.20 
  -3  -7  -1   11.40    1.40 
   3   7   1   10.20    1.90 
  -3   7  -1   11.20    1.80 
   3   7   1   10.90    2.00 
  -3   7  -1    7.30    2.00 
  -3   7  -1   10.20    1.60 
   3   7   1   11.90    1.90 
   3   7   1   11.70    1.30 
  -4  -7  -1    0.40    0.90 
  -4  -7  -1    3.90    2.00 
  -4  -7  -1    2.60    1.10 
  -4  -7  -1    1.00    1.80 
   4  -7   1    1.00    1.60 
   4  -7   1    2.70    0.80 
  -4   7  -1    3.90    1.00 
  -4   7  -1    3.10    1.90 
  -4   7  -1    1.80    1.30 
  -4   7  -1    1.00    1.00 
   4   7   1    0.80    1.20 
   4   7   1    3.30    1.50 
  -5  -7  -1  268.97   20.70 
  -5  -7  -1  290.67   21.50 
  -5  -7  -1  280.17   20.90 
  -5  -7  -1  270.07   21.30 
   5   7   1  284.17   21.20 
  -5   7  -1  292.07   20.80 
   5   7   1  287.97   20.90 
  -5   7  -1  272.87   21.30 
  -5   7  -1  260.37   20.70 
  -5   7  -1  289.87   21.00 
  -6  -7  -1   88.79    6.90 
  -6  -7  -1   78.69    7.30 
   6  -7   1   82.79    7.50 
  -6  -7  -1   83.79    7.60 
  -6  -7  -1   74.19    6.40 
  -6   7  -1   82.99    7.40 
  -6   7  -1   83.19    6.40 
  -6   7  -1   85.49    7.00 
   6   7   1   82.89    6.60 
   6   7   1   82.99    7.30 
  -6   7  -1   86.79    6.80 
   7  -7   1  237.68   18.60 
  -7  -7  -1  210.48   18.00 
  -7  -7  -1  250.27   18.50 
  -7  -7  -1  247.08   19.00 
  -7  -7  -1  246.28   18.80 
  -7   7  -1  269.07   18.40 
   7   7   1  256.07   18.80 
  -7   7  -1  241.18   18.80 
   7   7   1  247.48   18.10 
  -7   7  -1  231.88   18.50 
  -8  -7  -1   29.00    2.90 
  -8  -7  -1   42.80    4.20 
   8  -7   1   40.40    4.30 
  -8  -7  -1   36.00    4.10 
  -8  -7  -1   30.30    2.90 
  -8  -7  -1   40.80    4.90 
   8   7   1   37.20    4.30 
  -8   7  -1   36.50    4.10 
  -8   7  -1   41.60    4.40 
  -8   7  -1   38.90    4.00 
   8   7   1   37.70    3.10 
  -9  -7  -1  164.58   12.40 
  -9  -7  -1  140.39   12.00 
   9  -7   1  139.39   11.80 
  -9  -7  -1  150.78   11.80 
  -9   7  -1  159.98   11.80 
  -9   7  -1  133.89   12.00 
   9   7   1  145.49   12.30 
 -10  -7  -1   85.79    7.80 
  10  -7   1   85.59    8.10 
 -10  -7  -1   95.19    8.30 
 -10  -7  -1   86.19    7.90 
  10  -7   1   90.69    7.90 
 -10   7  -1   97.69    7.80 
  10   7   1   72.59    8.40 
 -10   7  -1   87.89    8.20 
 -11  -7  -1   29.90    3.90 
 -11  -7  -1   33.90    4.40 
 -11  -7  -1   28.70    3.70 
  11  -7   1   34.00    4.00 
  11  -7   1   27.10    4.00 
 -11   7  -1   31.90    4.30 
  11   7   1   27.80    4.50 
 -11   7  -1   33.40    3.90 
 -12  -7  -1   21.70    3.40 
  12  -7   1   20.20    3.50 
  12  -7   1   21.10    3.30 
 -12  -7  -1   23.70    3.70 
 -12  -7  -1   28.70    3.70 
  12   7   1   20.20    3.80 
 -12   7  -1   21.80    3.70 
 -12   7  -1   22.50    3.30 
  13  -7   1    5.00    2.40 
  13  -7   1    1.10    2.60 
 -13  -7  -1    7.10    2.90 
 -13  -7  -1    7.90    2.80 
 -13  -7  -1    7.10    2.90 
 -13   7  -1    3.90    2.80 
 -13   7  -1    3.50    2.50 
  13   7   1    3.50    3.40 
  14  -7   1   19.00    3.40 
 -14  -7  -1   24.40    3.70 
  14  -7   1   22.20    4.00 
 -14  -7  -1   25.50    3.90 
 -14  -7  -1   22.50    3.60 
 -14   7  -1   22.40    3.70 
 -14   7  -1   25.90    3.70 
  14   7   1   20.30    4.30 
  15  -7   1   -0.40    2.20 
 -15  -7  -1   -0.40    2.60 
 -15  -7  -1    1.70    2.70 
  15  -7   1    1.20    2.60 
 -15  -7  -1   -2.70    2.50 
  15   7   1    2.60    3.50 
 -15   7  -1   -1.70    2.40 
  16  -7   1   12.30    3.00 
 -16  -7  -1    6.30    2.90 
  16  -7   1    9.30    2.70 
 -16  -7  -1    5.60    3.10 
  16  -7   1    6.50    3.60 
 -16  -7  -1   10.70    3.20 
 -16   7  -1   11.50    3.10 
  16   7   1   13.90    4.20 
  17  -7   1    9.30    3.60 
  17  -7   1   19.70    3.20 
 -17  -7  -1   11.90    3.40 
 -17  -7  -1   18.30    3.60 
 -17  -7  -1   14.90    3.50 
  17  -7   1   19.50    3.40 
  17   7   1   23.00    4.60 
 -17   7  -1   15.90    3.50 
 -18  -7  -1    4.30    5.50 
 -18  -7  -1    3.40    2.80 
  18  -7   1    3.40    2.70 
  18  -7   1    3.50    3.50 
 -18  -7  -1    6.80    3.10 
 -18   7  -1    2.00    2.80 
  18   7   1    2.40    3.90 
  17  -8  -1   12.20    4.00 
 -17  -8   1   13.80    3.40 
  17  -8  -1   17.00    3.50 
 -17  -8   1   15.00    3.60 
 -17  -8   1    8.20    3.10 
 -17   8   1    7.90    3.00 
 -16  -8   1  131.69   11.50 
  16  -8  -1  117.69   10.90 
 -16  -8   1  140.59   11.70 
  16  -8  -1  154.88   11.80 
 -16  -8   1  134.39   12.00 
 -16   8   1  133.09   11.40 
  16   8  -1  146.69   12.80 
 -15  -8   1   98.49    9.00 
 -15  -8   1  103.59    9.10 
  15  -8  -1   91.69    8.30 
 -15  -8   1   97.59    9.30 
  15  -8  -1  102.29    9.20 
  15   8  -1   92.49   10.00 
 -15   8   1   92.49    8.80 
 -15   8   1   99.89    9.20 
  14  -8  -1  142.99   11.70 
  14  -8  -1  152.18   12.40 
 -14  -8   1  146.59   12.20 
 -14  -8   1  151.48   12.10 
 -14  -8   1  141.69   12.50 
 -14   8   1  141.79   12.50 
 -14   8   1  142.99   12.00 
  14   8  -1  139.19   13.00 
  13  -8  -1   53.49    5.70 
 -13  -8   1   51.69    7.40 
 -13  -8   1   65.79    6.80 
 -13  -8   1   54.99    6.20 
  13  -8  -1   55.79    6.50 
  13   8  -1   43.80    6.10 
 -13   8   1   58.29    6.00 
 -13   8   1   62.59    7.00 
 -12  -8   1   -0.20    2.20 
 -12  -8   1    0.70    2.80 
  12  -8  -1    2.10    2.00 
  12  -8  -1    3.70    2.70 
 -12   8   1   -0.80    2.60 
 -12   8   1    2.00    2.20 
  12   8  -1    4.00    3.10 
  11  -8  -1   78.29    7.40 
 -11  -8   1   87.39    7.60 
  11  -8  -1   80.09    8.00 
 -11  -8   1   82.59    7.70 
 -11  -8   1   89.69    8.10 
  11   8  -1   75.79    8.50 
 -11   8   1   88.19    7.50 
 -11   8   1   79.99    8.10 
 -10  -8   1    4.00    2.60 
  10  -8  -1    5.10    2.60 
 -10  -8   1    0.90    2.00 
 -10  -8   1    2.00    2.20 
  10  -8  -1    4.10    2.10 
  10   8  -1    1.80    2.70 
  10   8  -1    5.70    1.10 
 -10   8   1    4.40    2.40 
 -10   8   1    5.10    2.10 
  -9  -8   1  112.59    9.70 
  -9  -8   1   92.69    8.70 
   9  -8  -1  115.29    9.90 
  -9  -8   1  111.69   10.10 
   9  -8  -1  121.69    9.50 
  -9  -8   1  119.89    9.50 
   9   8  -1  122.29   10.20 
   9   8  -1  115.49    8.90 
  -9   8   1  115.89    9.80 
  -9   8   1  130.69    9.40 
  -8  -8   1  176.18   13.70 
  -8  -8   1  164.48   13.10 
   8  -8  -1  175.18   13.80 
  -8  -8   1  174.18   14.00 
  -8  -8   1  173.88   14.30 
   8   8  -1  179.28   13.30 
  -8   8   1  170.28   13.90 
   8   8  -1  181.28   14.10 
  -8   8   1  191.18   13.70 
  -8   8   1  177.58   13.20 
  -8   8   1  171.28   13.10 
  -7  -8   1   39.40    4.80 
  -7  -8   1   33.50    4.40 
   7  -8  -1   37.80    4.50 
  -7  -8   1   44.40    3.50 
  -7   8   1   41.80    4.00 
  -7   8   1   41.60    3.70 
  -7   8   1   44.80    4.60 
   7   8  -1   39.00    3.90 
   7   8  -1   34.10    4.20 
  -7   8   1   43.20    5.00 
  -6  -8   1  119.29   10.20 
  -6  -8   1  118.79   10.00 
  -6  -8   1  117.89    9.10 
   6  -8  -1  113.09    9.80 
  -6  -8   1  113.99    9.40 
   6   8  -1  115.19    9.40 
  -6   8   1  122.99    9.70 
  -6   8   1  126.49    9.30 
  -6   8   1  119.69   10.00 
   6   8  -1  115.09    9.80 
  -6   8   1  128.69    9.30 
  -5  -8   1  227.68   18.40 
  -5  -8   1  245.08   17.60 
  -5  -8   1  243.28   17.70 
   5  -8  -1  214.58   17.60 
   5  -8  -1  239.48   18.20 
  -5  -8   1  247.98   18.40 
   5   8  -1  226.88   18.00 
  -5   8   1  244.78   17.80 
  -5   8   1  235.68   18.00 
   5   8  -1  225.98   17.80 
  -5   8   1  233.28   18.20 
  -5   8   1  245.08   17.60 
  -4  -8   1    1.70    2.00 
  -4  -8   1    6.00    1.20 
  -4  -8   1    1.90    1.10 
  -4  -8   1    2.70    2.00 
   4  -8  -1    2.30    1.90 
   4  -8  -1    1.40    0.80 
   4  -8  -1    2.20    1.10 
   4   8  -1    4.60    1.00 
  -4   8   1    2.30    1.50 
   4   8  -1    2.30    1.60 
  -4   8   1    2.30    1.30 
   4   8  -1    2.40    1.60 
  -4   8   1    4.80    2.00 
  -3  -8   1   88.69    7.70 
  -3  -8   1   88.99    7.60 
  -3  -8   1   86.89    6.80 
  -3  -8   1   84.69    6.50 
   3  -8  -1   79.19    6.90 
   3  -8  -1   83.39    7.60 
   3   8  -1   88.99    6.50 
   3   8  -1   92.99    7.20 
  -3   8   1   85.39    7.00 
  -3   8   1   86.59    7.10 
   3   8  -1   78.59    7.20 
  -3   8   1   77.99    7.40 
  -2  -8   1  294.47   21.20 
  -2  -8   1  294.97   21.90 
   2  -8  -1  295.67   21.40 
  -2  -8   1  290.67   21.80 
   2  -8  -1  287.47   21.00 
   2  -8  -1  303.17   21.90 
  -2   8   1  281.77   21.40 
  -2   8   1  285.77   21.70 
   2   8  -1  251.27   21.50 
   2   8  -1  279.17   21.60 
   2   8  -1  284.87   21.40 
  -2   8   1  270.17   21.60 
   1  -8  -1  661.73   47.80 
  -1  -8   1  673.63   48.50 
   1  -8  -1  669.53   48.50 
  -1  -8   1  637.34   48.30 
  -1  -8   1  663.03   47.80 
   1  -8  -1  666.43   48.20 
   1   8  -1  596.54   48.20 
  -1   8   1  680.83   48.00 
  -1   8   1  654.63   48.20 
   1   8  -1  596.74   48.20 
   1   8  -1  685.93   48.00 
  -1   8   1  622.94   48.20 
   0  -8  -1 3026.20  224.38 
   0  -8   1 3155.88  223.98 
   0  -8  -1 3079.49  224.68 
   0  -8   1 3048.40  224.78 
   0  -8   1 2908.61  224.38 
   0  -8  -1 3281.17  224.28 
   0   8   1 2923.51  224.38 
   0   8   1 3047.30  224.38 
   0   8   1 3189.18  224.08 
   0   8  -1 3219.98  224.08 
   0   8  -1 2817.82  224.48 
   1  -8   1  700.73   50.99 
   1  -8   1  689.33   50.49 
  -1  -8  -1  676.83   51.39 
  -1  -8  -1  669.83   51.29 
  -1  -8  -1  682.63   50.59 
   1  -8   1  720.43   51.29 
   1   8   1  675.53   50.99 
  -1   8  -1  648.64   50.89 
  -1   8  -1  725.23   50.79 
   1   8   1  725.73   50.79 
   1   8   1  686.63   50.99 
  -1   8  -1  662.23   51.09 
   2  -8   1 2632.34  192.78 
  -2  -8  -1 2639.44  192.68 
   2  -8   1 2424.66  191.88 
   2  -8   1 2715.33  192.38 
  -2  -8  -1 2667.73  192.08 
  -2  -8  -1 2671.43  192.78 
   2   8   1 2641.84  191.88 
  -2   8  -1 2671.33  192.18 
   2   8   1 2688.43  192.18 
  -2   8  -1 2608.14  192.58 
  -2   8  -1 2532.55  192.28 
   3  -8   1  483.65   35.20 
  -3  -8  -1  495.15   35.80 
  -3  -8  -1  478.55   35.10 
   3  -8   1  466.05   35.60 
  -3  -8  -1  481.35   35.80 
   3   8   1  483.85   35.70 
   3   8   1  440.26   34.90 
  -3   8  -1  465.15   35.30 
  -3   8  -1  487.25   35.30 
   3   8   1  484.85   35.40 
   3   8   1  475.75   35.40 
  -3   8  -1  476.85   35.60 
  -4  -8  -1 2429.16  179.78 
  -4  -8  -1 2491.45  179.18 
   4  -8   1 2324.87  178.98 
   4  -8   1 2375.06  179.68 
  -4  -8  -1 2431.66  179.08 
  -4  -8  -1 2495.15  179.88 
  -4   8  -1 2418.86  179.68 
   4   8   1 2460.35  179.38 
   4   8   1 2432.86  179.38 
  -4   8  -1 2508.25  179.28 
  -4   8  -1 2624.74  179.08 
  -4   8  -1 2396.56  179.28 
   5  -8   1  306.37   24.10 
  -5  -8  -1  332.37   24.40 
  -5  -8  -1  331.17   23.70 
  -5  -8  -1  299.27   23.50 
  -5  -8  -1  321.27   24.20 
  -5   8  -1  334.87   23.50 
  -5   8  -1  303.07   23.60 
  -5   8  -1  317.17   23.80 
  -5   8  -1  309.37   24.10 
   5   8   1  318.87   23.90 
   5   8   1  317.27   23.70 
  -6  -8  -1  351.86   27.40 
   6  -8   1  371.36   27.10 
  -6  -8  -1  370.96   26.80 
  -6  -8  -1  349.67   27.20 
  -6  -8  -1  352.26   26.50 
  -6   8  -1  359.26   27.20 
   6   8   1  357.46   27.00 
  -6   8  -1  345.17   26.50 
   6   8   1  358.16   26.60 
  -6   8  -1  380.56   26.60 
  -6   8  -1  345.57   26.80 
  -7  -8  -1   39.00    5.10 
  -7  -8  -1   41.30    3.90 
   7  -8   1   44.50    5.10 
  -7  -8  -1   49.20    5.40 
  -7  -8  -1   50.89    4.70 
  -7   8  -1   58.09    5.40 
   7   8   1   45.30    5.40 
  -7   8  -1   46.90    4.90 
  -7   8  -1   50.69    4.50 
   7   8   1   49.99    4.20 
  -8  -8  -1   56.39    6.20 
   8  -8   1   49.30    5.60 
  -8  -8  -1   54.29    5.70 
  -8  -8  -1   58.89    5.30 
  -8  -8  -1   50.79    4.40 
  -8   8  -1   61.89    5.90 
  -8   8  -1   54.59    5.10 
   8   8   1   55.59    6.10 
  -8   8  -1   49.10    5.60 
   8   8   1   61.29    4.60 
  -9  -8  -1  140.59   11.60 
  -9  -8  -1  132.89   11.70 
  -9  -8  -1  169.68   13.10 
   9  -8   1  157.08   12.60 
  -9  -8  -1  163.68   12.70 
  -9  -8  -1  168.88   12.50 
   9   8   1  177.88   13.10 
  -9   8  -1  178.98   12.40 
  -9   8  -1  152.08   12.70 
 -10  -8  -1   10.50    2.30 
 -10  -8  -1    5.20    2.80 
 -10  -8  -1    5.30    2.50 
  10  -8   1    8.00    2.80 
  10  -8   1    6.30    2.40 
  10   8   1    1.00    2.90 
 -10   8  -1    8.70    2.20 
 -10   8  -1    6.80    2.70 
 -11  -8  -1   29.50    4.00 
  11  -8   1   33.50    4.40 
 -11  -8  -1   38.20    4.10 
 -11  -8  -1   27.50    4.40 
  11  -8   1   32.80    4.00 
 -11   8  -1   43.20    4.50 
  11   8   1   36.10    5.00 
 -11   8  -1   34.40    4.60 
 -12  -8  -1   88.99    8.70 
 -12  -8  -1   93.79    8.10 
 -12  -8  -1  102.59    8.50 
  12  -8   1   93.69    8.50 
  12  -8   1   87.79    8.10 
 -12   8  -1   88.69    8.00 
  12   8   1   78.99    9.00 
 -12   8  -1   78.79    8.60 
  13  -8   1   89.99    8.40 
 -13  -8  -1   90.89    8.30 
  13  -8   1   79.89    7.90 
 -13  -8  -1   92.09    8.70 
 -13  -8  -1   82.09    8.00 
 -13   8  -1   86.59    7.90 
 -13   8  -1   91.19    8.60 
  13   8   1   83.79    9.00 
 -14  -8  -1   12.20    3.10 
 -14  -8  -1   13.80    3.30 
 -14  -8  -1    4.90    2.70 
  14  -8   1    6.20    2.90 
  14  -8   1   10.20    2.70 
  14   8   1    6.20    3.60 
 -14   8  -1    9.80    2.80 
 -14   8  -1    5.40    3.00 
 -15  -8  -1   21.30    3.70 
 -15  -8  -1   26.60    4.20 
  15  -8   1   19.10    3.40 
  15  -8   1   28.60    3.90 
 -15  -8  -1   19.50    3.80 
  15   8   1   24.40    4.60 
 -15   8  -1   22.40    3.60 
 -15   8  -1   16.10    3.50 
  16  -8   1    5.40    2.60 
 -16  -8  -1    8.30    3.30 
  16  -8   1    9.90    3.10 
 -16  -8  -1    6.00    2.90 
 -16  -8  -1   10.40    3.30 
 -16   8  -1    3.80    2.70 
  16   8   1   11.50    4.20 
  17  -8   1   11.30    2.80 
 -17  -8  -1   11.80    3.40 
 -17  -8  -1    4.90    2.90 
 -17  -8  -1    7.60    3.40 
  17  -8   1    2.60    3.40 
  17  -8   1   12.30    3.20 
 -17   8  -1   10.70    3.00 
  17   8   1    9.60    4.40 
  17  -9  -1   66.49    7.30 
 -17  -9   1   53.99    6.80 
 -17  -9   1   71.29    7.30 
 -17  -9   1   54.09    6.80 
 -17   9   1   56.29    6.50 
  17   9  -1   67.99    7.50 
 -16  -9   1   28.80    4.60 
  16  -9  -1   25.40    3.60 
  16  -9  -1   37.90    4.70 
 -16  -9   1   29.30    4.10 
 -16  -9   1   35.20    4.60 
 -16   9   1   34.10    4.70 
 -16   9   1   30.80    4.10 
  16   9  -1   41.30    5.70 
 -15  -9   1   14.60    3.40 
 -15  -9   1   15.60    3.70 
  15  -9  -1   11.00    2.70 
 -15  -9   1   15.70    3.20 
  15  -9  -1   14.30    3.50 
 -15   9   1   13.30    3.60 
  15   9  -1   10.90    4.20 
 -15   9   1   14.30    3.00 
  14  -9  -1    0.50    2.10 
 -14  -9   1    4.00    2.60 
  14  -9  -1    1.70    2.90 
 -14  -9   1   -1.10    2.50 
 -14  -9   1    5.00    3.10 
 -14   9   1   -0.60    2.90 
  14   9  -1    2.30    3.50 
 -14   9   1   -0.50    2.20 
 -13  -9   1  129.19   11.00 
 -13  -9   1  120.09   10.20 
 -13  -9   1  116.39   10.40 
  13  -9  -1  123.49   10.70 
  13  -9  -1  120.29   10.00 
  13   9  -1  111.59   11.30 
 -13   9   1  114.79   10.90 
 -13   9   1  118.49   10.10 
 -12  -9   1   20.80    4.00 
 -12  -9   1   24.60    3.40 
  12  -9  -1   29.70    3.40 
 -12  -9   1   24.00    3.70 
  12  -9  -1   22.30    3.80 
 -12   9   1   20.40    3.80 
  12   9  -1   16.60    4.10 
 -12   9   1   22.20    3.20 
 -11  -9   1   30.70    4.10 
  11  -9  -1   33.60    3.80 
 -11  -9   1   27.20    4.20 
  11  -9  -1   25.60    4.50 
 -11  -9   1   29.10    3.70 
 -11   9   1   25.10    4.20 
 -11   9   1   25.90    3.40 
  11   9  -1   31.90    2.70 
  11   9  -1   30.70    4.70 
  10  -9  -1   22.20    3.70 
 -10  -9   1   19.70    3.40 
 -10  -9   1   13.60    3.40 
 -10  -9   1   16.10    1.90 
 -10  -9   1   18.90    2.90 
  10  -9  -1   19.30    3.00 
 -10   9   1   21.40    2.80 
  10   9  -1   21.30    2.40 
  10   9  -1   23.30    3.80 
 -10   9   1   16.30    3.20 
   9  -9  -1  216.88   16.60 
  -9  -9   1  203.78   15.80 
  -9  -9   1  226.98   16.90 
  -9  -9   1  222.48   16.50 
   9  -9  -1  196.78   16.90 
  -9  -9   1  209.78   17.10 
   9   9  -1  219.28   17.10 
   9   9  -1  213.98   16.00 
  -9   9   1  216.68   16.30 
  -9   9   1  205.18   16.70 
  -8  -9   1   15.90    1.80 
   8  -9  -1   13.80    2.70 
  -8  -9   1   18.30    2.50 
  -8  -9   1   14.40    3.10 
  -8  -9   1   18.20    3.10 
   8   9  -1   14.50    2.10 
  -8   9   1   18.40    3.00 
  -8   9   1   18.30    2.20 
   8   9  -1   17.30    3.00 
  -8   9   1   15.70    1.90 
  -7  -9   1   13.50    2.40 
  -7  -9   1   12.80    2.60 
  -7  -9   1   14.70    1.70 
   7  -9  -1   10.70    2.50 
  -7  -9   1   11.30    2.90 
  -7   9   1    9.90    1.90 
  -7   9   1   14.90    2.70 
  -7   9   1   10.80    2.80 
  -7   9   1   12.00    1.90 
   7   9  -1   11.20    2.80 
   7   9  -1   13.50    2.00 
  -6  -9   1    1.80    1.10 
  -6  -9   1    1.80    1.40 
  -6  -9   1    3.30    2.20 
   6  -9  -1    1.20    2.00 
  -6  -9   1   -1.90    2.20 
  -6   9   1    0.60    1.10 
   6   9  -1    2.50    2.10 
  -6   9   1    0.30    1.30 
  -6   9   1   -0.20    1.70 
   6   9  -1    1.10    1.80 
  -6   9   1    0.60    2.20 
  -5  -9   1   80.79    6.70 
  -5  -9   1   77.49    7.60 
  -5  -9   1   90.79    6.70 
   5  -9  -1   90.19    7.70 
  -5  -9   1   76.79    7.80 
  -5   9   1   85.09    7.60 
   5   9  -1   76.99    7.00 
  -5   9   1   83.19    6.90 
   5   9  -1   90.29    7.30 
  -5   9   1   86.59    6.50 
  -5   9   1   80.39    7.20 
  -4  -9   1   17.50    3.10 
   4  -9  -1   13.10    2.00 
  -4  -9   1   16.40    1.70 
  -4  -9   1   17.70    3.20 
  -4  -9   1   20.20    2.00 
   4  -9  -1   18.90    3.00 
  -4   9   1   19.30    2.30 
  -4   9   1   17.80    3.00 
   4   9  -1   16.10    1.80 
   4   9  -1   14.20    2.40 
   4   9  -1   11.50    2.30 
  -4   9   1   15.60    2.40 
   3  -9  -1    4.30    0.90 
  -3  -9   1    0.90    2.10 
  -3  -9   1    3.30    1.30 
  -3  -9   1    6.10    2.30 
   3  -9  -1    3.20    2.20 
   3   9  -1    3.60    1.70 
   3   9  -1    2.90    1.80 
  -3   9   1    2.20    1.90 
  -3   9   1    5.40    1.60 
  -3   9   1    1.80    1.70 
   3   9  -1    5.60    1.80 
   2  -9  -1    9.60    1.30 
  -2  -9   1    5.70    2.40 
  -2  -9   1    8.00    2.30 
   2  -9  -1    7.80    1.70 
   2  -9  -1   12.50    2.70 
  -2  -9   1    6.90    1.40 
  -2   9   1    5.40    2.00 
   2   9  -1   10.00    2.20 
   2   9  -1    7.40    1.90 
   2   9  -1    5.60    1.60 
  -2   9   1    6.80    1.70 
  -1  -9   1   62.39    5.90 
  -1  -9   1   53.99    6.20 
   1  -9  -1   64.99    5.60 
   1  -9  -1   62.29    6.20 
  -1  -9   1   65.39    5.00 
   1  -9  -1   57.19    4.90 
  -1   9   1   62.69    5.50 
   1   9  -1   54.89    5.50 
  -1   9   1   62.79    5.40 
  -1   9   1   52.29    5.70 
   1   9  -1   65.39    5.40 
   1   9  -1   56.89    5.80 
   0  -9   1   12.30    1.60 
   0  -9   1   12.50    2.30 
   0  -9  -1   10.60    1.60 
   0  -9  -1   12.30    2.80 
   0  -9  -1   13.20    2.40 
   0  -9   1   10.40    2.80 
   0   9  -1   12.60    2.30 
   0   9   1   14.40    2.20 
   0   9   1   11.60    1.90 
   0   9  -1   12.40    2.00 
   0   9   1   10.60    2.20 
  -1  -9  -1   14.70    1.80 
   1  -9   1   13.80    2.90 
   1  -9   1   15.30    1.60 
  -1  -9  -1   10.40    2.40 
  -1  -9  -1   12.00    2.60 
   1  -9   1   17.20    2.40 
   1   9   1   14.20    2.30 
  -1   9  -1   16.90    2.20 
   1   9   1   11.70    2.20 
  -1   9  -1   12.50    2.00 
  -1   9  -1   10.50    2.40 
   1   9   1   11.40    2.00 
  -2  -9  -1    5.70    1.40 
   2  -9   1    4.80    0.90 
  -2  -9  -1    7.00    2.20 
   2  -9   1    4.20    1.60 
  -2  -9  -1    2.10    2.10 
   2  -9   1    9.80    2.40 
   2   9   1    4.80    1.60 
  -2   9  -1    4.70    1.50 
  -2   9  -1    2.80    1.60 
   2   9   1    7.10    1.90 
  -2   9  -1    3.10    2.10 
  -3  -9  -1  479.55   35.70 
   3  -9   1  450.55   35.10 
  -3  -9  -1  489.05   35.00 
   3  -9   1  453.65   35.60 
  -3  -9  -1  460.75   35.70 
   3   9   1  480.95   35.30 
  -3   9  -1  463.35   35.20 
   3   9   1  479.65   35.60 
   3   9   1  436.16   34.70 
  -3   9  -1  476.35   35.20 
  -3   9  -1  476.55   35.60 
   3   9   1  490.35   35.30 
   3   9   1  524.15   34.80 
   4  -9   1   21.20    2.10 
  -4  -9  -1   28.80    3.70 
   4  -9   1   24.40    3.40 
  -4  -9  -1   22.60    3.30 
  -4  -9  -1   26.80    2.80 
  -4   9  -1   30.80    3.10 
   4   9   1   29.40    3.30 
  -4   9  -1   27.00    3.00 
   4   9   1   34.20    2.60 
  -4   9  -1   23.80    3.40 
   4   9   1   18.30    2.80 
  -5  -9  -1    8.00    1.40 
   5  -9   1    5.20    2.30 
  -5  -9  -1    3.60    2.30 
  -5  -9  -1    5.10    2.50 
   5  -9   1    4.40    1.00 
  -5  -9  -1    5.00    1.30 
   5   9   1    4.10    1.90 
  -5   9  -1    4.30    1.40 
  -5   9  -1    5.20    2.40 
  -5   9  -1    6.20    1.90 
   6  -9   1   67.79    6.30 
  -6  -9  -1   64.49    5.40 
  -6  -9  -1   61.69    6.60 
  -6  -9  -1   71.99    6.40 
  -6  -9  -1   62.39    5.10 
   6   9   1   66.19    5.40 
  -6   9  -1   52.49    5.80 
   6   9   1   65.19    6.20 
  -6   9  -1   61.19    5.20 
  -6   9  -1   63.79    6.30 
  -6   9  -1   55.79    5.20 
  -7  -9  -1    0.40    2.00 
  -7  -9  -1    3.80    2.50 
   7  -9   1    0.40    2.10 
  -7  -9  -1    2.10    1.00 
  -7  -9  -1    1.50    1.60 
   7   9   1    2.10    1.30 
  -7   9  -1    4.50    2.30 
   7   9   1    0.50    2.20 
  -7   9  -1    2.00    1.30 
  -7   9  -1    1.90    1.00 
  -7   9  -1    1.30    1.90 
  -8  -9  -1    2.10    2.30 
  -8  -9  -1    1.50    1.70 
   8  -9   1    3.90    2.20 
  -8  -9  -1   -1.70    2.30 
  -8  -9  -1    1.30    1.00 
   8   9   1    3.50    1.30 
   8   9   1    1.80    2.60 
  -8   9  -1    2.80    1.60 
  -8   9  -1    0.80    2.00 
  -8   9  -1    3.10    2.50 
  -9  -9  -1   52.89    4.90 
  -9  -9  -1   54.29    5.40 
  -9  -9  -1   43.10    5.10 
  -9  -9  -1   38.10    3.60 
   9  -9   1   42.60    5.20 
   9   9   1   48.20    5.20 
  -9   9  -1   47.10    4.50 
  -9   9  -1   36.50    4.60 
 -10  -9  -1    4.00    2.20 
 -10  -9  -1    3.70    2.80 
  10  -9   1    2.50    2.30 
  10  -9   1    6.40    2.80 
 -10   9  -1    6.90    2.00 
  10   9   1    6.90    3.10 
 -10   9  -1    3.60    2.50 
  11  -9   1    1.00    2.20 
 -11  -9  -1   -2.20    2.20 
 -11  -9  -1    1.30    2.10 
  11  -9   1   -0.10    2.80 
 -11  -9  -1   -1.60    2.60 
 -11   9  -1   -0.10    2.40 
 -11   9  -1    0.30    1.90 
  11   9   1    2.40    3.10 
  12  -9   1   40.30    4.70 
 -12  -9  -1   43.30    6.30 
  12  -9   1   40.80    4.90 
 -12  -9  -1   37.70    4.70 
 -12  -9  -1   46.80    4.70 
  12   9   1   36.40    5.30 
 -12   9  -1   47.20    4.90 
 -12   9  -1   33.00    4.80 
 -13  -9  -1   40.50    4.50 
  13  -9   1   36.30    4.70 
 -13  -9  -1   33.40    4.50 
 -13  -9  -1   36.30    4.90 
  13  -9   1   40.90    4.60 
  13   9   1   36.10    5.30 
 -13   9  -1   36.40    4.20 
 -13   9  -1   39.60    5.00 
 -14  -9  -1    8.90    3.30 
 -14  -9  -1   14.20    3.10 
  14  -9   1   17.80    3.50 
  14  -9   1   13.10    3.00 
 -14  -9  -1   15.90    3.40 
  14   9   1    9.10    4.00 
 -14   9  -1   12.00    3.30 
 -14   9  -1   14.80    2.90 
  15  -9   1    5.60    3.00 
 -15  -9  -1    1.20    3.00 
 -15  -9  -1    4.10    2.70 
  15  -9   1    4.10    2.60 
 -15  -9  -1    6.50    3.00 
  15   9   1    1.80    3.80 
 -15   9  -1   -1.00    2.60 
 -15   9  -1    5.40    2.50 
  16  -9   1   39.90    4.70 
  16  -9   1   29.90    4.10 
 -16  -9  -1   35.20    4.40 
 -16  -9  -1   37.10    4.70 
 -16  -9  -1   29.70    4.70 
 -16   9  -1   31.00    4.20 
  16   9   1   34.60    5.80 
  17  -9   1   29.90    6.10 
 -17  -9  -1   44.90    5.10 
 -17  -9  -1   47.50    5.90 
  17  -9   1   53.49    5.40 
 -17  -9  -1   45.90    5.40 
  17   9   1   46.50    6.30 
 -17   9  -1   39.40    4.80 
 -16 -10   1  213.68   17.10 
 -16 -10   1  230.68   16.90 
  16 -10  -1  219.38   16.80 
 -16 -10   1  196.68   16.40 
  16  10  -1  208.48   17.70 
 -16  10   1  184.48   16.20 
 -16  10   1  198.48   16.80 
 -15 -10   1  120.39   10.30 
  15 -10  -1  111.59   10.30 
 -15 -10   1  113.19    9.80 
 -15 -10   1  119.49   10.60 
  15 -10  -1  106.39    9.40 
 -15  10   1  104.49    9.50 
  15  10  -1  105.89   11.20 
 -15  10   1  113.49   10.50 
  14 -10  -1  100.49    9.40 
 -14 -10   1  122.99   10.10 
  14 -10  -1  109.29   10.20 
 -14 -10   1  110.29    9.70 
 -14 -10   1  113.49   10.50 
 -14  10   1  111.09   10.50 
  14  10  -1  100.69   11.00 
 -14  10   1  112.59    9.40 
 -13 -10   1   10.30    2.70 
 -13 -10   1    4.20    2.90 
  13 -10  -1    8.50    3.40 
  13 -10  -1    5.60    2.50 
 -13 -10   1    5.30    3.20 
 -13  10   1    3.30    3.20 
 -13  10   1    7.60    2.30 
  13  10  -1    9.30    3.90 
  12 -10  -1   11.80    2.80 
 -12 -10   1   16.10    2.90 
 -12 -10   1   13.50    3.30 
  12 -10  -1   11.40    3.50 
 -12 -10   1   16.10    4.20 
 -12  10   1   14.80    2.60 
  12  10  -1   15.60    4.00 
 -12  10   1   12.90    3.60 
  11 -10  -1    1.60    2.80 
 -11 -10   1    2.30    2.10 
 -11 -10   1   -2.00    2.80 
  11 -10  -1    0.10    2.20 
 -11 -10   1   -1.40    2.50 
 -11  10   1    1.30    2.70 
  11  10  -1   -1.70    3.10 
 -11  10   1    1.00    1.80 
  10 -10  -1   12.70    2.80 
 -10 -10   1   14.50    3.40 
  10 -10  -1    9.20    3.20 
 -10 -10   1   14.10    1.50 
 -10 -10   1   10.40    2.90 
 -10 -10   1   19.40    2.70 
  10  10  -1    7.10    3.40 
 -10  10   1    7.70    2.90 
  10  10  -1   15.20    1.90 
 -10  10   1   13.50    2.30 
  -9 -10   1   27.80    2.80 
   9 -10  -1   29.00    3.80 
  -9 -10   1   32.10    3.50 
  -9 -10   1   26.30    4.30 
  -9 -10   1   34.90    4.80 
  -9  10   1   27.30    3.20 
  -9  10   1   34.50    4.20 
   9  10  -1   29.20    3.50 
   9  10  -1   32.70    4.30 
  -8 -10   1  238.98   18.50 
  -8 -10   1  241.68   18.90 
   8 -10  -1  246.08   19.40 
  -8 -10   1  260.17   19.90 
  -8 -10   1  282.47   19.60 
   8  10  -1  248.78   18.80 
  -8  10   1  247.68   19.30 
   8  10  -1  245.08   19.40 
  -8  10   1  246.88   18.60 
  -8  10   1  243.28   18.70 
   7 -10  -1  119.59    9.80 
  -7 -10   1  119.89    9.90 
  -7 -10   1  108.09    9.00 
  -7 -10   1  111.39    8.70 
  -7 -10   1  119.39   10.20 
  -7  10   1  112.69    8.80 
  -7  10   1  105.89    9.50 
   7  10  -1  110.79    9.10 
   7  10  -1  108.79    9.70 
  -7  10   1  118.99    8.90 
   6 -10  -1   75.79    7.20 
  -6 -10   1   76.29    7.50 
  -6 -10   1   74.49    6.00 
  -6 -10   1   82.49    7.20 
  -6 -10   1   72.49    6.10 
   6  10  -1   68.69    6.80 
   6  10  -1   72.39    6.40 
  -6  10   1   72.59    5.80 
  -6  10   1   76.79    6.30 
  -6  10   1   71.59    7.20 
  -6  10   1   71.79    6.70 
  -5 -10   1    5.20    1.20 
  -5 -10   1    5.00    2.60 
  -5 -10   1    4.40    2.50 
   5 -10  -1    3.90    1.20 
  -5 -10   1    6.80    1.40 
   5 -10  -1   11.00    2.60 
  -5  10   1    6.10    2.50 
  -5  10   1    7.30    2.10 
   5  10  -1    8.10    2.10 
   5  10  -1    3.50    1.80 
  -5  10   1    7.70    1.80 
  -4 -10   1   10.40    1.70 
   4 -10  -1   12.40    2.80 
   4 -10  -1   11.50    1.20 
   4 -10  -1   12.10    1.90 
  -4 -10   1    9.50    2.70 
  -4 -10   1   10.00    2.60 
  -4  10   1   12.90    2.10 
   4  10  -1    9.20    1.10 
  -4  10   1   11.40    2.20 
  -4  10   1    9.60    2.60 
   4  10  -1   11.60    2.30 
   4  10  -1    9.20    2.20 
   3 -10  -1   22.80    2.50 
  -3 -10   1   28.60    3.80 
  -3 -10   1   25.90    3.60 
   3 -10  -1   23.70    3.00 
   3 -10  -1   27.00    3.70 
  -3 -10   1   26.00    2.60 
   3  10  -1   21.80    3.00 
   3  10  -1   24.50    3.20 
  -3  10   1   29.00    3.60 
  -3  10   1   24.70    2.90 
   3  10  -1   24.90    2.90 
  -3  10   1   20.30    2.80 
   2 -10  -1   58.49    5.40 
   2 -10  -1   57.49    6.30 
  -2 -10   1   56.79    5.00 
  -2 -10   1   61.49    6.00 
   2 -10  -1   55.99    4.80 
  -2 -10   1   61.79    6.40 
  -2  10   1   57.59    5.90 
   2  10  -1   55.19    5.60 
   2  10  -1   55.39    5.70 
  -2  10   1   62.89    5.80 
   2  10  -1   61.49    5.50 
  -2  10   1   64.79    5.50 
   1 -10  -1  180.18   13.50 
  -1 -10   1  175.28   14.20 
   1 -10  -1  184.68   14.50 
  -1 -10   1  175.88   13.50 
  -1 -10   1  174.98   14.50 
   1 -10  -1  184.58   14.00 
   1  10  -1  171.58   14.00 
  -1  10   1  178.48   14.00 
   1  10  -1  177.18   14.20 
  -1  10   1  189.08   13.90 
  -1  10   1  173.18   14.10 
   1  10  -1  183.18   13.80 
   0 -10  -1  459.65   34.40 
   0 -10   1  453.75   34.10 
   0 -10   1  453.35   33.60 
   0 -10  -1  464.15   33.60 
   0 -10   1  452.75   34.40 
   0 -10  -1  455.75   34.10 
   0  10   1  461.15   34.10 
   0  10   1  458.55   33.80 
   0  10  -1  427.06   34.10 
   0  10   1  440.86   34.10 
   0  10  -1  475.35   33.80 
  -1 -10  -1  268.27   21.90 
   1 -10   1  286.27   21.70 
  -1 -10  -1  283.27   21.30 
   1 -10   1  286.67   21.20 
   1 -10   1  288.17   22.20 
  -1 -10  -1  287.27   22.10 
   1  10   1  293.17   21.50 
   1  10   1  284.37   21.70 
  -1  10  -1  266.57   21.80 
  -1  10  -1  282.37   21.60 
  -1  10  -1  300.97   21.50 
   1  10   1  295.57   21.80 
   2 -10   1  244.18   20.00 
   2 -10   1  245.58   19.40 
  -2 -10  -1  258.57   19.10 
  -2 -10  -1  268.67   20.00 
  -2 -10  -1  259.37   19.90 
   2  10   1  254.67   20.00 
  -2  10  -1  251.97   19.80 
  -2  10  -1  266.57   19.40 
   2  10   1  250.47   19.40 
   2  10   1  265.17   19.60 
  -2  10  -1  251.57   19.40 
  -3 -10  -1  273.77   21.10 
   3 -10   1  263.17   20.40 
  -3 -10  -1  279.37   21.10 
   3 -10   1  266.37   21.10 
   3 -10   1  253.87   20.00 
  -3 -10  -1  283.87   20.30 
  -3  10  -1  268.57   20.90 
  -3  10  -1  274.87   20.50 
   3  10   1  270.97   20.60 
   3  10   1  279.17   20.60 
   3  10   1  275.17   20.90 
  -3  10  -1  270.87   20.50 
   4 -10   1  446.16   34.20 
  -4 -10  -1  471.65   34.20 
  -4 -10  -1  483.35   33.50 
  -4 -10  -1  435.06   34.20 
   4  10   1  478.65   33.30 
  -4  10  -1  432.96   33.70 
  -4  10  -1  455.95   34.10 
   4  10   1  431.66   33.80 
  -4  10  -1  466.65   33.70 
   4  10   1  468.45   33.70 
   4  10   1  407.26   33.20 
  -5 -10  -1  165.88   11.90 
   5 -10   1  132.89   11.70 
  -5 -10  -1  165.48   12.80 
  -5 -10  -1  170.28   13.10 
   5 -10   1  168.08   12.90 
   5 -10   1  141.29   11.60 
   5  10   1  168.78   12.20 
  -5  10  -1  166.28   12.10 
   5  10   1  145.19   11.70 
  -5  10  -1  160.78   12.80 
  -5  10  -1  163.18   12.40 
   5  10   1  155.18   12.50 
  -6 -10  -1   77.79    7.60 
   6 -10   1   79.59    7.60 
  -6 -10  -1   78.89    6.60 
  -6 -10  -1   83.79    6.50 
  -6  10  -1   80.29    7.20 
  -6  10  -1   73.09    6.50 
  -6  10  -1   89.29    7.70 
   6  10   1   90.19    6.80 
   6  10   1   75.29    7.30 
  -7 -10  -1   30.00    4.20 
  -7 -10  -1   31.20    3.30 
  -7 -10  -1   31.30    3.90 
   7 -10   1   26.00    3.70 
  -7 -10  -1   25.20    2.80 
  -7  10  -1   26.80    3.50 
  -7  10  -1   25.00    2.90 
  -7  10  -1   30.60    4.00 
   7  10   1   28.60    3.20 
   7  10   1   27.50    3.70 
  -7  10  -1   20.60    2.70 
  -8 -10  -1   43.30    4.50 
  -8 -10  -1   44.40    5.30 
  -8 -10  -1   52.19    5.60 
  -8 -10  -1   44.90    3.80 
   8 -10   1   43.70    5.40 
   8  10   1   40.80    5.10 
  -8  10  -1   43.10    4.30 
  -8  10  -1   39.10    4.60 
   8  10   1   41.70    4.10 
  -8  10  -1   49.90    5.70 
  -9 -10  -1   12.90    2.90 
  -9 -10  -1    9.30    2.20 
  -9 -10  -1    8.40    2.90 
   9 -10   1   13.20    2.90 
  -9 -10  -1    9.60    1.40 
  -9  10  -1   10.90    2.00 
  -9  10  -1    8.80    2.70 
   9  10   1   10.10    3.10 
 -10 -10  -1   18.70    2.90 
  10 -10   1   15.30    3.60 
 -10 -10  -1   20.90    3.80 
 -10 -10  -1   21.80    3.60 
  10 -10   1   16.00    3.20 
 -10 -10  -1   17.60    2.00 
 -10 -10  -1   17.70    1.80 
 -10  10  -1   15.70    3.20 
  10  10   1   12.70    3.50 
 -10  10  -1   19.80    2.60 
  11 -10   1   78.09    7.70 
 -11 -10  -1   74.19    7.40 
 -11 -10  -1   69.19    7.70 
 -11 -10  -1   71.09    6.70 
  11 -10   1   65.39    7.00 
  11  10   1   75.89    8.00 
 -11  10  -1   66.19    7.40 
 -11  10  -1   70.19    6.40 
 -12 -10  -1  272.47   20.10 
 -12 -10  -1  272.47   19.70 
 -12 -10  -1  250.67   20.30 
  12 -10   1  234.78   19.70 
  12 -10   1  261.87   20.00 
 -12  10  -1  249.97   19.40 
 -12  10  -1  239.98   20.10 
  12  10   1  247.38   20.40 
  13 -10   1   31.50    4.20 
 -13 -10  -1   34.70    4.10 
 -13 -10  -1   34.20    4.50 
 -13 -10  -1   29.80    4.50 
  13 -10   1   38.20    4.70 
  13  10   1   27.20    5.10 
 -13  10  -1   30.70    3.70 
 -13  10  -1   30.10    4.70 
  14 -10   1   67.89    7.10 
 -14 -10  -1   63.39    6.40 
 -14 -10  -1   60.09    7.20 
  14 -10   1   60.89    6.50 
 -14 -10  -1   66.19    7.10 
  14  10   1   50.39    6.80 
 -14  10  -1   55.19    6.00 
 -14  10  -1   55.69    6.40 
  15 -10   1    6.50    2.70 
 -15 -10  -1    5.60    2.70 
  15 -10   1   10.50    3.30 
 -15 -10  -1   10.60    3.50 
 -15 -10  -1    6.90    3.20 
 -15  10  -1    6.20    3.10 
  15  10   1   10.90    4.20 
 -15  10  -1    4.90    2.50 
  16 -10   1   42.20    4.80 
 -16 -10  -1   38.30    4.80 
 -16 -10  -1   37.70    4.40 
 -16 -10  -1   29.10    4.80 
 -16  10  -1   28.20    4.00 
  16  10   1   28.90    5.40 
 -16  10  -1   27.50    4.30 
 -15 -11   1    0.80    3.20 
 -15 -11   1    2.20    2.50 
 -15 -11   1   -3.70    2.90 
  15 -11  -1   -0.40    2.10 
  15 -11  -1    7.30    3.30 
  15  11  -1   -1.10    4.10 
 -15  11   1   -1.80    3.00 
 -15  11   1    1.80    2.10 
  14 -11  -1    1.20    2.40 
 -14 -11   1    3.70    3.40 
 -14 -11   1    1.50    3.00 
  14 -11  -1   -1.00    3.00 
 -14 -11   1    3.60    2.40 
 -14  11   1    0.10    2.00 
  14  11  -1    0.60    3.60 
 -14  11   1    1.50    3.10 
 -13 -11   1   70.59    7.60 
 -13 -11   1   62.19    6.40 
  13 -11  -1   59.89    6.60 
 -13 -11   1   69.29    7.10 
  13 -11  -1   68.09    7.50 
 -13  11   1   59.89    6.90 
 -13  11   1   61.29    6.00 
  13  11  -1   57.49    6.90 
 -12 -11   1   25.10    4.40 
  12 -11  -1   28.30    3.90 
 -12 -11   1   29.00    4.30 
  12 -11  -1   34.50    4.70 
 -12 -11   1   29.30    3.70 
 -12  11   1   30.50    3.40 
  12  11  -1   24.90    4.70 
 -12  11   1   25.80    4.40 
 -11 -11   1    4.10    2.20 
  11 -11  -1    3.00    3.00 
  11 -11  -1    3.60    2.50 
 -11 -11   1    4.40    3.10 
 -11 -11   1    6.70    2.90 
 -11  11   1    3.00    2.90 
  11  11  -1    2.20    3.20 
 -11  11   1    1.00    1.70 
 -10 -11   1    2.50    2.90 
 -10 -11   1    3.70    1.10 
 -10 -11   1    2.80    2.10 
  10 -11  -1    1.70    2.40 
 -10 -11   1    2.90    2.80 
  10 -11  -1    5.20    3.00 
  10  11  -1    4.00    3.10 
  10  11  -1    2.30    1.60 
 -10  11   1    0.90    2.60 
 -10  11   1    5.20    1.70 
  -9 -11   1    2.60    1.20 
  -9 -11   1   -1.30    2.70 
  -9 -11   1   -2.50    2.40 
  -9 -11   1   -0.70    1.80 
   9 -11  -1    0.40    2.80 
   9 -11  -1    0.10    2.30 
   9  11  -1    1.00    1.40 
  -9  11   1    2.50    1.40 
   9  11  -1    1.40    2.70 
  -9  11   1   -4.10    2.30 
  -8 -11   1    2.80    1.20 
  -8 -11   1    1.00    1.60 
  -8 -11   1    0.60    2.40 
  -8 -11   1    0.20    2.40 
   8 -11  -1    2.00    2.40 
   8 -11  -1    1.60    2.60 
  -8  11   1    1.90    1.30 
   8  11  -1    0.30    1.50 
  -8  11   1    0.40    3.60 
   8  11  -1    1.50    2.50 
  -8  11   1    1.20    1.20 
  -7 -11   1    0.80    2.70 
  -7 -11   1    0.90    1.20 
   7 -11  -1   -0.10    2.30 
  -7 -11   1    2.80    2.50 
  -7 -11   1    2.60    1.40 
  -7  11   1    1.90    2.20 
  -7  11   1    0.70    1.00 
  -7  11   1    1.70    1.40 
   7  11  -1    1.20    1.60 
   7  11  -1    4.40    3.30 
  -6 -11   1   31.90    3.30 
  -6 -11   1   28.30    4.00 
  -6 -11   1   38.20    4.80 
   6 -11  -1   32.40    4.30 
  -6 -11   1   38.00    3.40 
  -6  11   1   31.80    3.90 
   6  11  -1   32.50    4.10 
  -6  11   1   35.00    3.70 
   6  11  -1   32.30    4.00 
  -6  11   1   36.90    4.40 
  -5 -11   1   74.89    7.10 
  -5 -11   1   73.59    5.80 
   5 -11  -1   69.89    7.10 
   5 -11  -1   65.69    5.40 
  -5 -11   1   70.19    7.30 
   5  11  -1   65.59    5.30 
  -5  11   1   81.19    6.20 
  -5  11   1   71.89    7.00 
   5  11  -1   78.79    6.40 
   5  11  -1   71.19    6.60 
  -5  11   1   64.09    6.40 
   5  11  -1   65.89    5.40 
   4 -11  -1   56.19    4.90 
  -4 -11   1   63.09    6.60 
   4 -11  -1   61.89    6.60 
  -4 -11   1   66.59    5.20 
  -4 -11   1   64.59    6.70 
   4  11  -1   62.19    5.90 
  -4  11   1   61.29    6.40 
   4  11  -1   56.19    5.80 
  -4  11   1   63.49    5.60 
  -4  11   1   56.69    5.80 
  -3 -11   1    6.80    2.50 
   3 -11  -1    0.50    1.50 
  -3 -11   1    4.40    2.50 
  -3 -11   1    4.40    1.50 
   3 -11  -1    4.00    1.20 
   3 -11  -1    5.60    2.50 
   3  11  -1    4.60    1.90 
  -3  11   1    4.80    2.00 
  -3  11   1    4.40    2.30 
   3  11  -1    4.60    1.90 
   3  11  -1    2.30    2.00 
  -3  11   1    6.80    1.90 
   2 -11  -1   39.50    3.60 
  -2 -11   1   41.00    4.80 
  -2 -11   1   40.70    3.80 
   2 -11  -1   35.80    4.60 
  -2 -11   1   31.50    4.50 
   2 -11  -1   38.30    4.10 
   2  11  -1   37.70    4.20 
  -2  11   1   42.90    4.30 
  -2  11   1   31.00    4.10 
   2  11  -1   39.30    4.40 
   2  11  -1   40.10    4.60 
  -2  11   1   41.40    4.30 
  -1 -11   1   18.80    2.20 
  -1 -11   1   18.30    3.10 
   1 -11  -1   19.90    2.70 
   1 -11  -1   16.80    2.10 
  -1 -11   1   17.60    3.50 
   1 -11  -1   17.50    3.20 
  -1  11   1   15.90    2.50 
   1  11  -1   20.70    2.80 
  -1  11   1   20.80    3.10 
   1  11  -1   16.80    2.50 
   1  11  -1   15.40    2.80 
  -1  11   1   21.70    2.90 
   0 -11   1    4.50    2.50 
   0 -11  -1    5.00    2.50 
   0 -11  -1    5.30    2.00 
   0 -11  -1    5.20    1.50 
   0 -11   1    2.70    1.90 
   0 -11   1    6.20    1.40 
   0  11  -1    4.30    2.20 
   0  11   1    4.40    2.10 
   0  11  -1    4.20    1.80 
   0  11   1    9.30    2.20 
   0  11   1    6.40    1.90 
  -1 -11  -1   29.70    3.10 
  -1 -11  -1   25.80    3.90 
  -1 -11  -1   28.80    3.80 
   1 -11   1   26.70    2.90 
   1 -11   1   26.90    4.10 
   1 -11   1   27.50    3.30 
  -1  11  -1   31.10    3.60 
  -1  11  -1   21.60    3.60 
   1  11   1   25.10    3.00 
  -1  11  -1   30.50    3.30 
   1  11   1   27.10    3.40 
   1  11   1   31.20    3.70 
  -2 -11  -1    1.20    1.30 
  -2 -11  -1    1.10    2.10 
  -2 -11  -1    1.50    2.50 
   2 -11   1    2.30    2.60 
   2 -11   1    0.20    1.10 
  -2  11  -1   -0.50    2.20 
   2  11   1   -2.20    1.70 
  -2  11  -1   -1.50    1.40 
   2  11   1    1.20    1.70 
  -2  11  -1    0.30    1.60 
   2  11   1    1.20    1.90 
  -3 -11  -1   70.99    6.60 
   3 -11   1   51.19    6.50 
   3 -11   1   56.89    4.80 
  -3 -11  -1   53.79    6.30 
  -3 -11  -1   62.69    5.10 
   3 -11   1   54.99    5.30 
   3  11   1   65.29    6.00 
   3  11   1   60.69    5.80 
   3  11   1   57.89    5.70 
  -3  11  -1   64.09    5.70 
  -3  11  -1   68.29    5.60 
  -3  11  -1   56.49    6.20 
  -4 -11  -1    3.30    1.40 
   4 -11   1    2.30    2.50 
  -4 -11  -1    9.40    2.70 
  -4 -11  -1    3.30    2.50 
   4 -11   1    3.40    0.90 
  -4  11  -1    8.30    1.80 
   4  11   1    1.20    1.80 
   4  11   1    2.30    2.00 
  -4  11  -1    3.10    2.50 
  -4  11  -1    4.00    1.90 
  -5 -11  -1   31.50    4.60 
  -5 -11  -1   33.70    4.50 
  -5 -11  -1   41.80    3.60 
   5 -11   1   40.80    4.70 
  -5  11  -1   31.70    3.90 
   5  11   1   32.40    3.10 
  -5  11  -1   36.60    4.60 
   5  11   1   29.80    4.00 
   5  11   1   44.70    4.20 
  -5  11  -1   43.10    3.90 
   5  11   1   40.20    3.50 
   6 -11   1  227.98   18.10 
  -6 -11  -1  228.88   18.30 
  -6 -11  -1  234.98   17.10 
  -6 -11  -1  244.78   18.10 
   6  11   1  250.57   17.50 
  -6  11  -1  217.48   17.20 
   6  11   1  228.58   17.80 
   6  11   1  197.98   17.00 
  -6  11  -1  246.68   18.20 
  -6  11  -1  221.78   17.60 
   7 -11   1   20.50    2.10 
  -7 -11  -1   19.60    2.10 
   7 -11   1   16.60    3.40 
  -7 -11  -1   17.50    3.20 
  -7 -11  -1   18.80    3.70 
   7  11   1   17.30    3.30 
   7  11   1   20.00    2.50 
  -7  11  -1   21.90    3.10 
  -7  11  -1   14.10    2.00 
  -7  11  -1   19.80    3.60 
   8 -11   1   12.30    3.20 
  -8 -11  -1   16.30    1.90 
  -8 -11  -1   12.80    3.30 
  -8 -11  -1   14.80    2.30 
  -8 -11  -1   15.20    3.10 
  -8  11  -1   13.20    3.20 
  -8  11  -1   18.00    3.40 
   8  11   1   11.70    3.20 
   8  11   1   17.60    2.30 
  -9 -11  -1    4.20    2.70 
  -9 -11  -1    5.60    2.90 
  -9 -11  -1    2.70    1.10 
  -9 -11  -1    3.70    1.90 
   9 -11   1    2.40    2.60 
  -9  11  -1    1.10    2.40 
  -9  11  -1    3.00    1.50 
   9  11   1    0.10    2.80 
  10 -11   1   17.50    3.40 
 -10 -11  -1   19.50    3.60 
 -10 -11  -1   19.60    3.80 
 -10 -11  -1   18.00    1.80 
 -10 -11  -1   20.30    2.90 
 -10 -11  -1   20.60    2.30 
  10 -11   1   18.70    3.60 
  10  11   1   14.60    3.70 
 -10  11  -1   16.60    3.30 
 -10  11  -1   14.40    2.30 
  11 -11   1   18.30    3.70 
 -11 -11  -1   16.50    2.90 
 -11 -11  -1   11.40    3.50 
 -11 -11  -1   17.60    3.40 
  11 -11   1   14.80    3.30 
  11  11   1   12.20    3.90 
 -11  11  -1   14.80    3.40 
 -11  11  -1   14.40    2.40 
 -12 -11  -1    3.70    2.30 
  12 -11   1    3.50    2.70 
 -12 -11  -1    6.00    3.30 
 -12 -11  -1    1.80    2.90 
  12 -11   1    4.80    3.10 
 -12  11  -1   -0.60    2.80 
 -12  11  -1    5.20    2.00 
  12  11   1    5.50    3.70 
  13 -11   1    5.10    2.80 
 -13 -11  -1    2.90    3.20 
 -13 -11  -1    5.10    3.10 
 -13 -11  -1    3.10    2.40 
  13 -11   1    3.70    3.10 
 -13  11  -1    6.90    2.10 
  13  11   1    1.70    3.70 
 -13  11  -1    5.70    3.20 
 -14 -11  -1    2.10    3.10 
  14 -11   1    4.80    3.20 
 -14 -11  -1    5.10    2.60 
 -14 -11  -1    5.40    3.40 
  14  11   1    4.60    3.90 
 -14  11  -1    1.80    3.00 
 -14  11  -1    2.40    2.10 
 -15 -11  -1   28.20    4.40 
  15 -11   1   19.90    3.60 
 -15 -11  -1   25.80    3.80 
 -15 -11  -1   29.80    4.60 
  15 -11   1   25.40    4.20 
 -15  11  -1   30.10    4.30 
  15  11   1   28.90    5.10 
 -15  11  -1   22.40    3.40 
 -14 -12   1  115.59    9.60 
 -14 -12   1  104.69    8.70 
 -14 -12   1  106.49    9.90 
  14 -12  -1   92.59    8.80 
  14 -12  -1  109.19    9.60 
 -14  12   1   85.69    8.20 
 -14  12   1   85.19    9.80 
  14  12  -1   91.49   11.60 
 -13 -12   1   29.20    3.70 
  13 -12  -1   24.40    3.80 
 -13 -12   1   26.10    4.30 
 -13 -12   1   29.80    4.60 
  13 -12  -1   31.00    4.60 
 -13  12   1   20.30    4.40 
  13  12  -1   25.80    5.00 
 -13  12   1   24.70    3.10 
 -12 -12   1   33.50    3.80 
 -12 -12   1   33.30    4.50 
 -12 -12   1   35.60    4.90 
  12 -12  -1   34.40    4.30 
  12 -12  -1   26.50    4.50 
 -12  12   1   27.60    3.30 
  12  12  -1   28.80    5.00 
 -12  12   1   31.70    4.60 
 -11 -12   1    6.70    3.20 
 -11 -12   1   10.60    1.30 
  11 -12  -1    7.10    3.50 
 -11 -12   1   15.30    4.60 
  11 -12  -1   11.90    3.00 
 -11 -12   1    8.30    2.40 
 -11  12   1    7.40    3.20 
 -11  12   1    5.30    1.70 
  11  12  -1    8.50    3.50 
  10 -12  -1   73.39    8.00 
 -10 -12   1   86.89    8.80 
 -10 -12   1   87.39    7.30 
 -10 -12   1   86.69    6.60 
 -10 -12   1   97.19    8.30 
  10 -12  -1   88.69    8.60 
  10  12  -1   94.59    8.70 
  10  12  -1   89.59    6.90 
 -10  12   1   77.99    8.20 
 -10  12   1   66.19    6.70 
   9 -12  -1   97.89    9.10 
  -9 -12   1   95.69    8.10 
  -9 -12   1   96.69    9.60 
  -9 -12   1  105.79    9.20 
   9 -12  -1   91.79    9.40 
  -9 -12   1  103.79    7.70 
   9  12  -1   98.39    8.00 
   9  12  -1   94.39    9.20 
  -9  12   1   92.69    9.00 
   8 -12  -1    8.40    2.80 
  -8 -12   1    4.60    1.70 
   8 -12  -1    6.50    2.90 
  -8 -12   1    4.70    2.90 
  -8 -12   1    7.10    3.00 
  -8 -12   1    6.70    1.60 
  -8  12   1    6.20    2.60 
   8  12  -1    6.20    1.90 
   8  12  -1    6.80    2.80 
  -8  12   1    4.60    1.50 
  -7 -12   1  255.87   21.40 
   7 -12  -1  263.37   21.10 
  -7 -12   1  284.47   20.10 
  -7 -12   1  293.97   21.20 
   7  12  -1  275.57   20.40 
   7  12  -1  252.17   20.80 
  -7  12   1  279.37   20.30 
  -7  12   1  243.18   20.70 
  -6 -12   1   -0.20    2.40 
   6 -12  -1    2.60    2.60 
  -6 -12   1    1.40    1.40 
   6  12  -1    1.10    2.20 
   6  12  -1    4.90    1.90 
  -6  12   1    1.90    1.60 
   6  12  -1    1.00    0.80 
  -6  12   1   -0.20    2.40 
  -5 -12   1    2.10    2.60 
   5 -12  -1    9.20    2.90 
  -5 -12   1    2.50    1.40 
  -5 -12   1    4.10    2.60 
   5 -12  -1    2.90    1.10 
  -5  12   1    2.90    2.60 
  -5  12   1    8.00    2.40 
   5  12  -1    4.10    2.00 
  -5  12   1    1.50    1.60 
   4 -12  -1  101.49    8.00 
   4 -12  -1  105.29    9.50 
  -4 -12   1  100.39    9.40 
  -4  12   1  113.79    8.60 
  -4  12   1  100.99    8.80 
   4  12  -1   94.19    8.70 
  -4  12   1  103.29   10.20 
   4  12  -1  105.49    8.80 
  -3 -12   1  142.99   11.70 
  -3 -12   1  125.39   11.50 
   3 -12  -1  134.69   10.30 
  -3 -12   1  143.29   10.40 
   3 -12  -1  119.39   10.50 
   3 -12  -1  137.99   11.60 
   3  12  -1  136.99   11.10 
   3  12  -1  128.59   11.00 
  -3  12   1  151.08   10.90 
  -3  12   1  123.99   11.20 
   3  12  -1  129.89   10.80 
  -3  12   1  138.59   10.90 
   2 -12  -1  188.88   15.80 
  -2 -12   1  194.28   15.90 
  -2 -12   1  183.18   15.60 
  -2 -12   1  195.48   14.80 
   2 -12  -1  193.08   14.70 
   2 -12  -1  190.68   15.10 
   2  12  -1  189.88   15.40 
  -2  12   1  191.48   15.60 
   2  12  -1  195.88   15.40 
  -2  12   1  216.08   15.20 
   2  12  -1  192.18   15.10 
  -2  12   1  209.38   15.30 
  -1 -12   1  398.16   32.20 
   1 -12  -1  446.56   32.50 
  -1 -12   1  422.46   32.50 
  -1 -12   1  410.16   31.50 
   1 -12  -1  428.16   31.50 
   1 -12  -1  408.16   31.90 
   1  12  -1  427.46   31.80 
  -1  12   1  446.56   32.00 
   1  12  -1  413.16   32.10 
  -1  12   1  445.26   31.80 
   1  12  -1  436.46   32.10 
  -1  12   1  425.56   32.10 
   0 -12  -1  715.23   51.89 
   0 -12   1  684.83   52.39 
   0 -12  -1  701.63   52.79 
   0 -12  -1  669.03   52.29 
   0 -12   1  688.23   51.89 
   0 -12   1  699.63   52.79 
   0  12   1  746.73   52.09 
   0  12  -1  731.23   52.09 
   0  12  -1  710.13   52.49 
   0  12   1  722.73   52.39 
   0  12  -1  679.23   52.49 
   1 -12   1  911.21   67.89 
   1 -12   1  863.51   68.29 
  -1 -12  -1  936.41   68.59 
  -1 -12  -1  950.30   68.79 
   1 -12   1  904.11   68.79 
  -1 -12  -1  922.11   67.99 
   1  12   1  952.70   68.49 
   1  12   1  929.31   68.39 
   1  12   1  925.31   68.19 
  -1  12  -1  915.91   68.59 
  -1  12  -1  965.50   68.19 
  -2 -12  -1  755.02   54.19 
   2 -12   1  684.83   54.39 
   2 -12   1  681.93   54.09 
  -2 -12  -1  704.43   54.89 
   2 -12   1  707.83   55.09 
  -2 -12  -1  777.12   55.09 
   2  12   1  774.72   54.79 
   2  12   1  735.83   54.39 
  -2  12  -1  734.53   54.89 
  -2  12  -1  774.42   54.59 
   2  12   1  754.72   54.59 
  -2  12  -1  753.92   54.39 
  -3 -12  -1  869.51   63.29 
  -3 -12  -1  861.11   64.09 
   3 -12   1  794.02   63.19 
  -3 -12  -1  898.11   64.09 
   3 -12   1  853.21   64.19 
   3  12   1  891.01   63.69 
   3  12   1  840.02   63.49 
  -3  12  -1  856.71   63.49 
  -3  12  -1  906.81   63.59 
  -3  12  -1  840.02   63.89 
   4 -12   1  597.64   48.40 
  -4 -12  -1  661.83   49.40 
   4 -12   1  669.23   49.50 
   4  12   1  634.44   49.10 
   4  12   1  699.13   48.90 
  -4  12  -1  718.43   48.90 
  -4  12  -1  634.74   48.80 
  -5 -12  -1  361.86   28.30 
   5 -12   1  360.36   28.30 
  -5 -12  -1  408.36   28.30 
  -5 -12  -1  390.56   27.30 
   5 -12   1  313.67   27.30 
   5  12   1  350.76   27.70 
  -5  12  -1  385.36   27.70 
   5  12   1  393.86   27.70 
  -5  12  -1  362.56   28.10 
  -5  12  -1  348.57   27.60 
  -6 -12  -1  185.08   13.90 
  -6 -12  -1  172.88   14.10 
  -6 -12  -1  186.78   12.80 
   6 -12   1  167.38   14.00 
  -6  12  -1  161.48   12.80 
  -6  12  -1  143.29   13.70 
   6  12   1  158.88   13.50 
  -6  12  -1  174.38   13.90 
   6  12   1  187.58   13.20 
   6  12   1  144.89   12.50 
   7 -12   1  149.29   12.60 
  -7 -12  -1  165.78   12.50 
  -7 -12  -1  163.58   11.50 
  -7 -12  -1  148.49   12.80 
  -7  12  -1  158.58   12.60 
   7  12   1  147.49   12.30 
  -7  12  -1  126.89   11.30 
   7  12   1  166.78   11.70 
   7  12   1  129.39   11.20 
  -7  12  -1  142.99   12.00 
   8 -12   1  158.08   13.30 
  -8 -12  -1  166.18   12.00 
  -8 -12  -1  174.38   13.70 
  -8 -12  -1  176.98   13.30 
   8  12   1  135.69   12.10 
   8  12   1  161.38   13.20 
  -8  12  -1  151.18   12.90 
  -9 -12  -1   15.10    2.00 
   9 -12   1   13.70    3.40 
  -9 -12  -1   15.40    3.40 
  -9 -12  -1   11.90    1.70 
   9 -12   1   12.10    2.50 
  -9 -12  -1   11.60    3.60 
  -9  12  -1   12.80    3.00 
   9  12   1   12.40    3.30 
  10 -12   1   11.40    3.50 
 -10 -12  -1   13.50    3.70 
 -10 -12  -1   19.40    1.90 
 -10 -12  -1   18.80    2.80 
  10 -12   1   18.10    3.70 
 -10 -12  -1   21.00    3.80 
 -10 -12  -1   19.70    2.50 
 -10  12  -1   13.00    3.30 
  10  12   1   17.10    3.90 
  11 -12   1   98.49   10.00 
 -11 -12  -1  114.19    9.30 
  11 -12   1  121.89   10.40 
 -11 -12  -1  123.59   10.20 
 -11 -12  -1  113.79   10.60 
  11  12   1  111.49   10.60 
 -11  12  -1   93.39   10.00 
  12 -12   1    5.20    3.20 
  12 -12   1    6.50    3.40 
 -12 -12  -1    9.00    3.30 
 -12 -12  -1    3.10    3.20 
  12  12   1    3.80    3.60 
 -12  12  -1    2.50    3.00 
  13 -12   1   50.69    5.80 
 -13 -12  -1   49.10    5.50 
  13 -12   1   52.39    6.20 
 -13 -12  -1   49.60    6.00 
 -13 -12  -1   55.09    5.90 
 -13  12  -1   46.70    4.80 
 -13  12  -1   35.30    5.50 
  13  12   1   50.69    6.40 
 -14 -12  -1   21.50    4.40 
  14 -12   1   29.00    4.40 
  14 -12   1   25.20    4.00 
 -14 -12  -1   32.90    5.50 
 -14 -12  -1   24.30    3.50 
  14  12   1   22.00    5.00 
 -14  12  -1   24.80    3.10 
 -14  12  -1   25.80    4.50 
  13 -13  -1   54.19    6.20 
 -13 -13   1   57.39    6.50 
 -13 -13   1   52.99    5.70 
 -13 -13   1   65.09    7.40 
  13 -13  -1   56.29    6.60 
 -13  13   1   46.70    6.10 
  13  13  -1   54.49    6.80 
 -12 -13   1    8.80    2.40 
  12 -13  -1    5.40    2.80 
 -12 -13   1    5.80    3.50 
  12 -13  -1   10.90    3.60 
 -12 -13   1    7.50    3.40 
  12  13  -1    5.40    3.80 
 -12  13   1    8.80    3.50 
  11 -13  -1    5.60    3.50 
 -11 -13   1   10.70    2.30 
 -11 -13   1    9.30    3.60 
 -11 -13   1   14.40    1.60 
 -11 -13   1    7.70    1.40 
 -11 -13   1    6.00    3.20 
  11  13  -1    7.90    3.70 
 -11  13   1    4.50    3.10 
  10 -13  -1   23.30    4.30 
 -10 -13   1   28.40    4.20 
 -10 -13   1   21.90    4.20 
 -10 -13   1   23.60    2.70 
  10 -13  -1   22.90    4.20 
  10  13  -1   14.40    3.90 
 -10  13   1   21.10    3.80 
  -9 -13   1    3.80    3.20 
  -9 -13   1    4.40    1.40 
   9 -13  -1    2.40    2.70 
  -9 -13   1    4.70    3.00 
   9 -13  -1    0.80    3.20 
  -9  13   1   -2.00    2.60 
   9  13  -1    3.30    1.70 
   9  13  -1    2.00    2.90 
   8 -13  -1   60.69    6.70 
   8 -13  -1   60.99    7.00 
  -8 -13   1   60.19    5.00 
  -8 -13   1   62.59    6.80 
  -8 -13   1   67.59    7.30 
  -8  13   1   53.19    5.00 
  -8  13   1   56.69    6.40 
   8  13  -1   62.09    5.50 
   8  13  -1   53.29    4.80 
   8  13  -1   60.49    6.70 
   7 -13  -1   42.30    3.60 
  -7 -13   1   44.20    5.50 
   7 -13  -1   43.10    5.10 
  -7 -13   1   45.80    4.00 
  -7 -13   1   36.90    4.90 
   7  13  -1   42.50    4.50 
   7  13  -1   38.30    3.40 
   7  13  -1   38.20    4.70 
  -7  13   1   44.40    4.20 
  -7  13   1   38.70    4.60 
   6 -13  -1    5.20    2.80 
  -6 -13   1   -2.20    2.50 
  -6 -13   1    3.00    1.50 
  -6 -13   1    1.80    2.90 
   6 -13  -1    3.10    1.20 
  -6  13   1    1.90    2.30 
   6  13  -1    5.10    2.60 
  -6  13   1    4.00    1.70 
   6  13  -1    0.80    1.90 
   5 -13  -1    4.50    2.80 
  -5 -13   1    3.80    1.50 
  -5 -13   1    1.10    2.80 
   5 -13  -1    0.70    1.20 
  -5 -13   1    0.50    2.70 
  -5  13   1    1.00    2.80 
   5  13  -1    3.00    2.10 
  -5  13   1   -0.70    2.20 
   5  13  -1    1.80    2.00 
  -5  13   1    2.60    1.80 
  -4 -13   1    0.10    1.50 
   4 -13  -1    1.90    1.30 
   4 -13  -1    3.70    2.70 
  -4 -13   1    1.00    2.40 
  -4 -13   1    0.90    2.70 
  -4  13   1   -0.60    2.10 
  -4  13   1   -1.50    2.50 
   4  13  -1    2.40    2.10 
   4  13  -1   -2.10    1.90 
  -4  13   1   -1.30    1.60 
   3 -13  -1   30.50    4.30 
  -3 -13   1   36.10    4.70 
   3 -13  -1   34.80    3.30 
  -3 -13   1   28.40    3.10 
  -3 -13   1   25.70    3.90 
   3  13  -1   35.30    5.10 
  -3  13   1   27.80    4.10 
   3  13  -1   27.50    3.80 
  -3  13   1   33.90    4.00 
  -3  13   1   32.20    3.70 
   3  13  -1   27.50    3.60 
  -2 -13   1    7.70    3.20 
   2 -13  -1    7.60    1.60 
  -2 -13   1    4.70    2.40 
   2 -13  -1    1.70    2.70 
   2 -13  -1    3.20    1.70 
  -2 -13   1    3.70    1.50 
   2  13  -1    4.60    2.00 
  -2  13   1    2.10    1.90 
   2  13  -1    1.80    2.30 
   2  13  -1    5.00    2.10 
  -2  13   1    2.10    2.50 
  -2  13   1    6.40    2.20 
  -1 -13   1    1.60    1.80 
   1 -13  -1    1.90    1.40 
   1 -13  -1    1.30    1.80 
  -1 -13   1   -0.10    2.00 
  -1 -13   1    1.70    2.60 
   1 -13  -1   -0.90    2.50 
  -1  13   1    1.40    2.00 
   1  13  -1    0.90    1.80 
   1  13  -1    1.90    2.30 
  -1  13   1    0.90    1.70 
   0 -13   1    1.50    3.40 
   0 -13   1    2.60    1.90 
   0 -13  -1    2.50    1.90 
   0 -13   1    0.30    1.40 
   0 -13  -1    1.30    2.30 
   0  13   1    2.10    2.20 
   0  13  -1    0.20    2.30 
   0  13   1    2.60    2.00 
   0  13  -1    1.00    1.60 
   0  13  -1   -0.50    2.50 
   1 -13   1   12.40    1.90 
  -1 -13  -1   14.10    3.00 
  -1 -13  -1   12.20    3.20 
  -1 -13  -1   14.00    2.00 
   1 -13   1   12.60    2.40 
   1  13   1   18.60    2.90 
   1  13   1   10.00    2.30 
  -1  13  -1   13.60    2.40 
   1  13   1   11.60    2.70 
  -1  13  -1   12.60    3.30 
  -1  13  -1   11.70    2.90 
   2 -13   1   13.20    3.40 
  -2 -13  -1   21.80    3.40 
  -2 -13  -1   16.40    2.20 
  -2 -13  -1   13.60    3.30 
   2 -13   1   15.80    2.10 
   2  13   1   17.00    2.90 
   2  13   1   14.60    2.60 
  -2  13  -1   19.90    2.80 
  -2  13  -1   16.60    3.30 
   2  13   1   22.60    3.10 
  -3 -13  -1  240.98   17.50 
  -3 -13  -1  227.78   18.40 
   3 -13   1  206.78   17.40 
   3 -13   1  218.58   18.60 
  -3 -13  -1  237.28   18.50 
   3  13   1  250.07   18.10 
  -3  13  -1  245.48   17.90 
  -3  13  -1  246.88   18.40 
   3  13   1  224.28   17.90 
  -3  13  -1  231.68   18.40 
  -4 -13  -1   38.10    4.90 
   4 -13   1   39.20    5.10 
  -4 -13  -1   41.70    4.90 
  -4 -13  -1   47.20    4.10 
   4 -13   1   41.10    3.80 
   4  13   1   51.49    5.00 
   4  13   1   35.80    4.30 
  -4  13  -1   54.49    5.90 
  -4  13  -1   46.00    4.50 
  -4  13  -1   38.20    4.40 
   5 -13   1   27.90    2.90 
   5 -13   1   33.60    4.60 
  -5 -13  -1   31.80    4.40 
  -5 -13  -1   32.20    3.40 
  -5 -13  -1   36.90    4.60 
  -5  13  -1   27.00    3.70 
   5  13   1   27.50    3.60 
   5  13   1   31.40    3.60 
  -5  13  -1   30.30    3.70 
  -5  13  -1   32.90    4.30 
  -6 -13  -1    3.80    2.90 
   6 -13   1    2.90    3.10 
  -6 -13  -1    1.90    2.70 
   6 -13   1    3.00    1.00 
  -6 -13  -1    3.50    1.50 
  -6  13  -1    4.50    2.30 
   6  13   1    2.40    2.40 
  -6  13  -1    2.60    2.90 
   6  13   1    6.50    2.10 
  -6  13  -1    6.20    1.60 
  -7 -13  -1   36.90    4.70 
  -7 -13  -1   35.50    3.40 
  -7 -13  -1   31.00    4.60 
  -7  13  -1   31.30    4.00 
   7  13   1   30.80    4.00 
  -7  13  -1   27.70    3.20 
  -7  13  -1   39.80    4.70 
   7  13   1   27.80    2.80 
   8 -13   1    1.70    3.40 
  -8 -13  -1    0.60    2.60 
  -8 -13  -1    0.40    2.70 
  -8 -13  -1    1.90    1.40 
  -8  13  -1    2.90    2.40 
   8  13   1    1.40    2.80 
  -8  13  -1    0.70    1.10 
   9 -13   1    1.20    3.00 
  -9 -13  -1    0.40    1.40 
   9 -13   1    1.20    1.30 
  -9 -13  -1    1.20    2.70 
  -9 -13  -1    3.00    1.30 
   9 -13   1    1.40    2.80 
  -9 -13  -1    5.50    2.90 
  -9  13  -1    0.40    2.60 
   9  13   1    0.80    2.80 
   9  13   1    2.90    1.50 
 -10 -13  -1   -1.20    3.00 
 -10 -13  -1   -0.10    1.10 
  10 -13   1   -1.00    2.70 
 -10 -13  -1    1.90    1.30 
  10 -13   1   -0.30    3.00 
  10 -13   1    2.30    1.40 
 -10 -13  -1    1.20    3.00 
 -10  13  -1    3.80    2.70 
  10  13   1   -0.80    3.20 
  10  13   1   -2.60    1.60 
 -11 -13  -1   30.60    4.60 
  11 -13   1   25.60    4.30 
  11 -13   1   21.80    2.60 
  11 -13   1   35.50    4.50 
 -11 -13  -1   27.70    4.20 
  11  13   1   28.90    3.20 
  11  13   1   22.10    4.50 
 -11  13  -1   25.40    4.00 
  12 -13   1    1.00    1.30 
 -12 -13  -1    0.50    3.00 
  12 -13   1    0.40    3.10 
  12 -13   1    2.40    2.90 
 -12 -13  -1   -1.60    2.90 
  12  13   1   -0.20    3.40 
 -12  13  -1   -0.90    2.80 
  13 -13   1    0.10    1.70 
 -13 -13  -1    2.70    3.40 
 -13 -13  -1    2.50    3.30 
  13 -13   1    0.00    4.70 
  13 -13   1    3.20    2.90 
  13  13   1   -1.60    3.50 
 -13  13  -1    0.00    3.20 
  12 -14  -1    9.80    2.90 
  12 -14  -1    8.00    3.50 
 -12 -14   1    7.10    3.70 
 -12 -14   1    8.50    3.40 
 -12  14   1    3.00    3.50 
  12  14  -1    3.30    3.60 
  12  14  -1    8.60    2.10 
 -11 -14   1    8.50    3.80 
  11 -14  -1    7.80    3.00 
  11 -14  -1   10.40    3.70 
 -11 -14   1    8.90    1.40 
 -11 -14   1    5.20    3.30 
  11  14  -1   10.70    3.90 
 -11  14   1    5.60    3.30 
  11  14  -1   10.80    2.00 
  10 -14  -1   16.50    4.20 
 -10 -14   1   22.10    2.20 
  10 -14  -1   15.20    3.50 
 -10 -14   1   19.40    2.40 
 -10 -14   1   19.00    3.90 
 -10 -14   1   25.50    5.40 
 -10  14   1   21.70    3.90 
  10  14  -1   16.70    4.00 
   9 -14  -1  237.38   18.90 
  -9 -14   1  254.97   17.80 
  -9 -14   1  278.17   19.10 
   9 -14  -1  230.38   17.60 
   9 -14  -1  237.38   19.10 
  -9 -14   1  247.78   19.40 
   9  14  -1  211.68   18.80 
  -9  14   1  197.88   18.60 
  -8 -14   1    4.70    1.60 
   8 -14  -1    7.30    3.10 
   8 -14  -1    3.90    1.30 
   8 -14  -1    5.90    3.40 
  -8 -14   1    8.20    3.50 
  -8 -14   1    8.50    3.10 
   8  14  -1    7.90    2.10 
  -8  14   1   10.20    3.00 
   8  14  -1    6.90    3.00 
  -8  14   1    8.40    1.60 
  -7 -14   1  426.46   29.80 
   7 -14  -1  365.86   29.70 
  -7 -14   1  403.16   30.10 
   7 -14  -1  368.96   28.60 
   7 -14  -1  370.76   29.70 
  -7 -14   1  416.06   28.70 
  -7  14   1  340.27   29.20 
   7  14  -1  347.67   29.30 
  -7  14   1  404.26   28.90 
   7  14  -1  418.96   29.10 
  -6 -14   1   27.90    4.50 
   6 -14  -1   29.70    3.20 
  -6 -14   1   34.80    4.50 
  -6 -14   1   28.50    3.10 
   6 -14  -1   32.40    4.50 
  -6  14   1   32.70    3.80 
   6  14  -1   28.60    4.00 
  -6  14   1   32.00    4.10 
   6  14  -1   32.90    3.80 
  -5 -14   1    3.70    2.80 
  -5 -14   1    4.40    1.70 
   5 -14  -1    3.70    1.50 
  -5 -14   1    3.50    2.80 
   5 -14  -1    4.10    2.90 
  -5  14   1    8.10    2.20 
   5  14  -1    3.80    2.40 
   5  14  -1    4.50    2.30 
  -5  14   1    6.90    2.60 
   4 -14  -1   19.90    2.30 
  -4 -14   1   20.50    2.40 
  -4 -14   1   18.20    3.80 
   4 -14  -1   19.70    3.80 
  -4 -14   1   22.80    4.00 
  -4  14   1   24.20    3.00 
   4  14  -1   13.80    2.80 
  -4  14   1   14.30    3.00 
  -3 -14   1   60.89    6.40 
  -3 -14   1   61.69    6.70 
   3 -14  -1   46.90    5.90 
  -3 -14   1   57.19    5.00 
   3  14  -1   54.09    5.60 
   3  14  -1   51.59    6.00 
  -3  14   1   63.49    5.60 
  -3  14   1   42.30    5.60 
  -3  14   1   57.69    6.50 
  -2 -14   1    6.60    1.70 
   2 -14  -1    5.80    3.00 
  -2 -14   1    5.40    2.60 
  -2 -14   1    9.60    3.30 
   2 -14  -1    2.50    1.60 
  -2  14   1    7.00    2.80 
   2  14  -1    7.00    2.20 
   2  14  -1    6.10    2.60 
  -2  14   1    2.90    2.00 
  -2  14   1    9.50    2.40 
   1 -14  -1   54.49    6.20 
  -1 -14   1   50.89    5.00 
  -1 -14   1   52.69    5.80 
   1 -14  -1   51.69    4.90 
  -1 -14   1   53.29    6.30 
  -1  14   1   56.19    5.70 
  -1  14   1   56.49    5.70 
   1  14  -1   59.09    6.20 
  -1  14   1   60.19    6.30 
   1  14  -1   64.99    7.60 
   1  14  -1   56.69    5.60 
   0 -14   1   46.30    4.80 
   0 -14  -1   52.59    4.70 
   0 -14   1   53.39    6.60 
   0 -14  -1   56.29    6.50 
   0  14  -1   49.50    6.00 
   0  14   1   53.39    5.40 
   0  14  -1   59.29    5.40 
   0  14   1   46.90    5.90 
   0  14  -1   46.20    5.40 
   1 -14   1  139.69   12.70 
   1 -14   1  143.39   11.40 
  -1 -14  -1  145.59   11.40 
  -1 -14  -1  149.29   12.60 
  -1  14  -1  148.29   12.40 
   1  14   1  142.59   12.10 
  -1  14  -1  144.89   11.80 
  -1  14  -1  155.08   11.90 
   1  14   1  153.08   11.80 
  -2 -14  -1    8.50    1.90 
  -2 -14  -1    9.60    2.70 
   2 -14   1    8.30    2.30 
   2 -14   1    9.70    3.30 
  -2 -14  -1    8.70    3.10 
   2  14   1   10.70    2.50 
  -2  14  -1   10.50    2.40 
   2  14   1   14.40    2.80 
  -2  14  -1   12.40    3.10 
  -2  14  -1    9.00    2.40 
  -3 -14  -1  173.98   13.00 
  -3 -14  -1  161.08   13.90 
  -3 -14  -1  182.98   14.10 
   3 -14   1  174.98   14.30 
   3 -14   1  155.08   12.90 
  -3  14  -1  171.08   13.50 
   3  14   1  154.28   13.40 
  -3  14  -1  185.08   13.50 
  -3  14  -1  170.68   14.10 
  -4 -14  -1   65.49    5.20 
  -4 -14  -1   56.09    6.70 
   4 -14   1   57.49    7.00 
   4 -14   1   50.69    4.90 
  -4 -14  -1   51.49    6.50 
   4  14   1   57.29    5.90 
   4  14   1   66.69    6.10 
  -4  14  -1   54.99    5.90 
  -4  14  -1   56.29    5.50 
  -4  14  -1   60.39    6.80 
  -5 -14  -1   85.89    6.60 
   5 -14   1   76.49    8.30 
   5 -14   1   73.89    6.40 
  -5 -14  -1   83.59    8.20 
   5  14   1   91.09    7.40 
  -5  14  -1   76.19    7.40 
  -5  14  -1   78.89    6.90 
   5  14   1   80.69    7.50 
  -5  14  -1   76.39    8.20 
   6 -14   1   21.10    4.10 
   6 -14   1   25.00    2.40 
  -6 -14  -1   26.90    2.60 
  -6 -14  -1   22.00    3.80 
  -6 -14  -1   14.20    3.50 
  -6  14  -1   19.20    3.30 
  -6  14  -1   29.50    4.40 
  -6  14  -1   22.00    2.70 
   6  14   1   17.00    3.30 
  -7 -14  -1   93.99    8.10 
  -7 -14  -1   76.59    8.10 
   7 -14   1   73.19    6.00 
   7 -14   1   76.19    8.10 
  -7 -14  -1   84.19    6.30 
  -7  14  -1   62.29    7.20 
  -7  14  -1   70.69    6.30 
   7  14   1   78.59    7.60 
  -8 -14  -1   40.90    4.90 
  -8 -14  -1   37.30    3.40 
  -8 -14  -1   35.70    5.10 
  -8 -14  -1   31.30    3.80 
   8 -14   1   33.80    4.80 
   8 -14   1   30.90    3.00 
  -8  14  -1   26.40    4.10 
   8  14   1   27.10    4.20 
   9 -14   1    1.20    2.90 
  -9 -14  -1    5.30    3.10 
  -9 -14  -1    1.80    1.50 
  -9 -14  -1    1.80    1.30 
   9 -14   1    8.70    3.50 
  -9 -14  -1   -1.70    2.80 
   9  14   1    0.10    1.00 
   9  14   1    0.80    3.00 
  -9  14  -1    0.50    2.60 
  10 -14   1   30.70    4.70 
  10 -14   1   31.60    4.70 
 -10 -14  -1   35.80    3.10 
 -10 -14  -1   22.10    4.30 
 -10 -14  -1   30.40    3.30 
 -10 -14  -1   32.80    4.80 
  10  14   1   29.60    4.70 
 -10  14  -1   31.80    4.40 
  10  14   1   25.10    3.20 
  11 -14   1  281.57   22.20 
  11 -14   1  297.37   22.30 
 -11 -14  -1  299.07   22.50 
 -11 -14  -1  330.97   23.00 
  11  14   1  243.18   21.10 
  11  14   1  312.87   23.90 
 -11  14  -1  242.68   21.90 
  12 -14   1    5.00    3.50 
 -12 -14  -1    4.40    3.30 
 -12 -14  -1    5.20    3.40 
  12 -14   1    2.10    2.90 
  12  14   1    6.70    4.10 
  12  14   1    3.30    1.90 
 -12  14  -1    8.70    3.40 
  11 -15  -1   32.10    4.70 
  11 -15  -1   27.20    4.20 
 -11 -15   1   25.50    4.50 
 -11 -15   1   25.10    4.80 
 -11 -15   1   32.60    2.80 
  11  15  -1   23.10    4.50 
 -11  15   1   19.10    4.20 
 -10 -15   1    8.90    3.70 
  10 -15  -1   12.50    3.20 
  10 -15  -1    9.40    3.90 
 -10 -15   1   11.70    3.60 
 -10 -15   1    9.10    1.60 
  10 -15  -1    7.40    1.50 
 -10 -15   1    9.10    1.90 
 -10  15   1    6.10    3.20 
  10  15  -1    4.00    5.90 
   9 -15  -1   -0.70    1.30 
   9 -15  -1    3.10    3.30 
  -9 -15   1    2.70    3.50 
  -9 -15   1    2.00    1.40 
  -9 -15   1    0.80    3.00 
   9 -15  -1    1.00    2.80 
   9  15  -1    1.90    3.10 
  -9  15   1    1.60    2.80 
  -8 -15   1    6.80    3.20 
  -8 -15   1    7.30    3.40 
  -8 -15   1    5.30    1.60 
   8 -15  -1    5.60    3.40 
   8 -15  -1    3.30    3.00 
  -8  15   1    4.40    1.90 
  -8  15   1    3.00    2.80 
   8  15  -1    3.50    2.70 
  -7 -15   1   47.90    4.20 
   7 -15  -1   40.90    5.30 
   7 -15  -1   46.20    4.10 
  -7 -15   1   40.40    5.10 
  -7 -15   1   46.70    5.60 
   7 -15  -1   38.50    5.40 
  -7  15   1   41.90    4.30 
  -7  15   1   42.30    4.90 
   7  15  -1   47.90    5.00 
   7  15  -1   35.90    4.70 
   6 -15  -1   19.30    3.90 
   6 -15  -1   15.90    2.20 
  -6 -15   1   18.20    3.80 
  -6 -15   1   16.70    3.90 
   6 -15  -1   13.50    3.80 
  -6 -15   1   17.60    2.30 
  -6  15   1   12.70    3.10 
   6  15  -1   16.50    3.10 
  -6  15   1   20.60    2.70 
   6  15  -1   18.70    3.00 
  -5 -15   1    0.90    2.50 
   5 -15  -1    1.70    1.60 
  -5 -15   1    2.30    3.10 
   5 -15  -1    3.40    3.00 
  -5 -15   1    4.20    1.70 
   5  15  -1    2.20    2.30 
  -5  15   1    4.80    2.00 
   5  15  -1    3.30    2.20 
  -5  15   1    5.20    2.60 
   4 -15  -1    2.00    2.90 
  -4 -15   1    2.00    3.00 
  -4 -15   1    3.20    1.60 
   4 -15  -1    2.40    1.60 
  -4 -15   1    2.60    2.90 
  -4  15   1    4.20    2.00 
  -4  15   1    3.70    2.40 
   4  15  -1    3.80    2.40 
   4  15  -1    1.90    2.30 
   3 -15  -1   16.70    3.60 
   3 -15  -1    8.70    2.00 
  -3 -15   1   12.20    3.40 
  -3 -15   1   13.20    2.10 
   3  15  -1   13.30    2.90 
  -3  15   1    8.60    2.60 
  -3  15   1   17.30    2.70 
   3  15  -1    9.80    2.50 
   2 -15  -1    3.80    3.00 
   2 -15  -1    4.00    1.70 
  -2 -15   1    1.10    1.60 
  -2 -15   1    1.90    3.00 
  -2  15   1    4.30    2.30 
  -2  15   1    1.30    2.70 
  -2  15   1    3.20    2.10 
   2  15  -1    2.10    2.50 
   2  15  -1    1.60    2.10 
   1 -15  -1    2.60    2.90 
  -1 -15   1   -2.30    1.50 
  -1 -15   1    0.90    2.90 
   1 -15  -1    3.10    1.60 
   1  15  -1    0.10    2.10 
   1  15  -1    0.30    2.50 
  -1  15   1    0.50    2.10 
  -1  15   1   -0.20    2.60 
   0 -15  -1    2.70    3.00 
   0 -15   1    0.80    3.00 
   0 -15   1    1.00    1.60 
   0 -15  -1    1.20    1.50 
   0  15  -1    0.90    2.60 
   0  15   1    1.40    2.20 
   0  15  -1    2.00    2.20 
   0  15   1    1.90    2.50 
   1 -15   1   19.40    3.80 
   1 -15   1   20.50    2.50 
  -1 -15  -1   16.50    3.50 
  -1 -15  -1   16.60    2.40 
  -1  15  -1   19.90    3.00 
  -1  15  -1   18.10    3.50 
   1  15   1   16.40    2.90 
   1  15   1   18.30    3.40 
   2 -15   1    0.90    1.50 
  -2 -15  -1    3.00    2.80 
  -2 -15  -1    3.10    1.60 
   2 -15   1    0.60    2.90 
  -2  15  -1    3.90    1.90 
  -2  15  -1    0.50    2.10 
   2  15   1   -0.20    2.00 
   2  15   1   -1.40    2.30 
  -2  15  -1    1.20    2.80 
  -3 -15  -1   59.39    6.90 
   3 -15   1   59.59    6.80 
  -3 -15  -1   59.39    5.30 
   3 -15   1   65.59    5.30 
   3  15   1   60.99    6.30 
  -3  15  -1   57.09    5.80 
  -3  15  -1   64.89    7.00 
   3  15   1   52.99    5.90 
  -3  15  -1   59.09    6.20 
  -4 -15  -1    6.90    1.80 
  -4 -15  -1   10.70    3.30 
   4 -15   1    9.10    3.40 
   4 -15   1    4.90    1.60 
  -4 -15  -1    8.20    2.90 
   4  15   1    8.00    2.50 
  -4  15  -1    5.30    3.10 
  -4  15  -1    8.70    2.10 
  -4  15  -1    6.30    2.50 
  -5 -15  -1    2.20    1.60 
  -5 -15  -1    0.30    3.00 
   5 -15   1    1.60    1.40 
   5 -15   1    3.10    3.00 
  -5 -15  -1    0.10    2.70 
  -5  15  -1    4.00    3.20 
  -5  15  -1    1.60    1.70 
   5  15   1    0.60    2.30 
  -5  15  -1    1.20    2.30 
   6 -15   1   28.00    4.40 
  -6 -15  -1   25.20    2.70 
  -6 -15  -1   22.80    3.80 
  -6 -15  -1   20.50    3.90 
  -6  15  -1   20.10    3.50 
   6  15   1   19.50    3.60 
  -6  15  -1   21.90    2.70 
  -7 -15  -1    2.20    1.50 
   7 -15   1    2.40    1.30 
  -7 -15  -1   -0.70    2.90 
  -7 -15  -1    3.50    2.20 
  -7 -15  -1    1.60    2.90 
   7 -15   1    2.80    3.20 
  -7  15  -1    2.80    1.40 
   7  15   1    5.90    2.80 
  -7  15  -1    3.00    2.50 
  -8 -15  -1    5.60    3.20 
   8 -15   1    9.30    1.50 
  -8 -15  -1    7.90    2.00 
   8 -15   1    4.20    3.40 
  -8 -15  -1    6.00    1.60 
  -8 -15  -1   10.50    3.50 
   8 -15   1    6.80    3.40 
  -8  15  -1    6.60    2.90 
   8  15   1    7.70    3.00 
  -9 -15  -1   12.50    1.90 
  -9 -15  -1   16.30    3.80 
   9 -15   1   18.40    4.00 
   9 -15   1   14.00    3.70 
  -9 -15  -1   11.90    2.10 
  -9 -15  -1   12.10    4.10 
   9 -15   1   12.50    1.70 
   9  15   1    8.30    3.30 
  -9  15  -1   17.40    3.40 
 -10 -15  -1    1.50    1.30 
 -10 -15  -1   -1.50    3.00 
  10 -15   1    0.60    3.30 
 -10 -15  -1    3.00    3.30 
  10 -15   1    0.90    2.90 
  10  15   1    5.50    3.50 
 -10  15  -1   -4.40    2.50 
  -9 -16   1  141.69   11.20 
  -9 -16   1  116.89    9.80 
   9 -16  -1  118.69    9.60 
   9 -16  -1  114.39   11.00 
  -9 -16   1  127.69    9.50 
   9 -16  -1  126.99   11.60 
   9  16  -1  119.99   11.00 
  -9  16   1  120.59   11.20 
   8 -16  -1  193.58   14.80 
  -8 -16   1  191.68   15.10 
  -8 -16   1  210.68   14.80 
   8 -16  -1  188.18   16.30 
  -8 -16   1  224.08   16.20 
   8 -16  -1  196.68   16.10 
   8  16  -1  159.18   17.50 
  -8  16   1  186.38   15.80 
  -8  16   1  190.08   14.80 
   7 -16  -1  297.57   22.70 
  -7 -16   1  309.97   22.70 
   7 -16  -1  314.37   24.70 
  -7 -16   1  356.76   25.00 
   7 -16  -1  297.27   23.80 
  -7  16   1  295.17   23.10 
   7  16  -1  285.67   23.30 
  -7  16   1  289.17   23.40 
   6 -16  -1  192.58   16.20 
   6 -16  -1  196.78   16.40 
  -6 -16   1  206.58   14.90 
   6 -16  -1  195.58   14.90 
  -6 -16   1  205.28   16.30 
   6  16  -1  176.18   15.60 
  -6  16   1  201.68   15.20 
  -6  16   1  186.08   15.60 
   6  16  -1  201.48   15.50 
   5 -16  -1   29.20    3.40 
  -5 -16   1   35.90    4.80 
  -5 -16   1   31.10    3.40 
   5 -16  -1   29.70    4.80 
   5 -16  -1   36.50    5.20 
  -5  16   1   45.70    4.20 
   5  16  -1   35.40    4.10 
   5  16  -1   35.70    4.30 
  -5  16   1   36.40    4.50 
  -4 -16   1   66.89    6.00 
   4 -16  -1   62.89    7.80 
   4 -16  -1   64.19    7.60 
  -4 -16   1   74.09    7.80 
   4 -16  -1   70.59    6.00 
   4  16  -1   78.59    7.10 
   4  16  -1   61.69    6.60 
  -4  16   1   69.59    6.90 
   3 -16  -1   32.70    4.60 
   3 -16  -1   33.40    3.20 
  -3 -16   1   26.70    3.10 
  -3 -16   1   25.90    4.50 
  -3  16   1   26.90    3.90 
   3  16  -1   26.40    3.70 
   3  16  -1   28.70    4.00 
   2 -16  -1   48.40    4.80 
   2 -16  -1   47.90    5.80 
  -2 -16   1   55.29    4.90 
  -2 -16   1   51.69    6.00 
   2  16  -1   51.69    6.10 
  -2  16   1   46.70    5.60 
   2  16  -1   47.50    5.50 
   1 -16  -1   98.29    7.90 
  -1 -16   1   90.79    7.90 
   1 -16  -1   94.79    9.50 
  -1 -16   1   93.89    9.50 
  -1  16   1  100.99    8.60 
   1  16  -1  104.29    9.10 
   1  16  -1   98.39    8.50 
   0 -16   1   40.40    4.30 
   0 -16  -1   39.40    5.20 
   0 -16   1   47.90    5.80 
   0 -16  -1   43.00    4.30 
   0  16   1   37.90    4.60 
   0  16  -1   44.50    4.70 
   0  16  -1   45.60    5.30 
  -1 -16  -1  340.67   25.30 
   1 -16   1  321.67   25.30 
   1 -16   1  343.67   26.50 
  -1 -16  -1  339.17   26.30 
  -1  16  -1  363.16   26.30 
   1  16   1  324.27   25.60 
  -1  16  -1  343.67   25.70 
   2 -16   1    9.90    2.00 
  -2 -16  -1    7.20    1.90 
  -2 -16  -1    7.50    3.30 
   2 -16   1   11.20    3.60 
  -2  16  -1    8.20    3.30 
   2  16   1   10.40    2.60 
  -2  16  -1    9.90    2.60 
  -3 -16  -1  361.56   27.50 
   3 -16   1  345.87   26.50 
  -3 -16  -1  355.96   26.50 
   3 -16   1  364.76   27.70 
   3  16   1  332.97   26.80 
  -3  16  -1  356.36   26.90 
  -3  16  -1  376.46   27.60 
  -4 -16  -1   59.19    7.10 
   4 -16   1   51.89    6.50 
   4 -16   1   58.69    5.30 
  -4 -16  -1   57.59    5.30 
  -4  16  -1   48.70    6.10 
   4  16   1   51.79    6.00 
  -4  16  -1   69.69    5.60 
   5 -16   1  119.69    9.90 
  -5 -16  -1  132.29   11.40 
  -5 -16  -1  133.39   10.00 
  -5 -16  -1  128.39   10.60 
   5 -16   1  134.09   11.60 
   5  16   1  113.59   10.60 
  -5  16  -1  128.09   10.20 
  -5  16  -1  126.49   10.70 
   6 -16   1   45.60    5.80 
  -6 -16  -1   43.00    5.10 
   6 -16   1   45.70    4.40 
  -6 -16  -1   47.80    5.60 
  -6 -16  -1   49.30    4.40 
   6  16   1   45.00    5.10 
  -6  16  -1   43.90    4.40 
  -6  16  -1   42.10    5.00 
  -7 -16  -1   51.79    5.20 
   7 -16   1   39.30    4.50 
  -7 -16  -1   56.19    4.60 
   7 -16   1   52.89    6.30 
  -7  16  -1   52.59    4.60 
  -7  16  -1   43.30    5.20 
   7  16   1   51.49    5.70 
  -8 -16  -1   41.80    5.30 
  -8 -16  -1   36.20    5.50 
  -8 -16  -1   40.60    3.90 
  -8 -16  -1   38.30    4.40 
   8 -16   1   36.60    3.90 
   8 -16   1   37.30    5.50 
   8 -16   1   43.20    5.50 
   8  16   1   44.10    5.00 
  -8  16  -1   39.20    4.90 
  -9 -16  -1    2.60    3.30 
   9 -16   1    0.90    3.00 
   6 -17  -1   22.70    4.60 
  -6 -17   1   18.40    2.60 
   6 -17  -1   27.40    4.40 
  -6 -17   1   25.60    4.40 
   6 -17  -1   24.80    2.80 
  -6  17   1   23.40    4.80 
  -6  17   1   24.50    3.00 
   6  17  -1   20.40    3.50 
   5 -17  -1    1.70    1.60 
  -5 -17   1   -1.50    3.00 
   5 -17  -1    0.90    2.90 
  -5 -17   1    1.90    1.70 
   5 -17  -1    2.40    3.40 
  -5  17   1   -0.80    2.50 
   4 -17  -1    7.60    2.00 
   4 -17  -1   13.80    3.70 
   4 -17  -1    8.80    4.30 
  -4 -17   1    6.90    2.70 
  -4  17   1   10.90    3.00 
   4  17  -1   10.50    2.60 
  -3 -17   1   19.20    3.50 
   3 -17  -1   17.70    2.40 
   3 -17  -1   11.60    3.60 
  -3 -17   1   17.00    3.90 
   3 -17  -1   20.50    4.00 
  -3  17   1   13.60    3.10 
   3  17  -1   19.30    3.40 
   3  17  -1   17.10    3.10 
   2 -17  -1    2.10    3.00 
  -2 -17   1    3.90    3.10 
   2 -17  -1    2.60    1.70 
  -2 -17   1    8.30    1.90 
   2 -17  -1    7.30    3.30 
   2  17  -1    5.10    2.90 
  -2  17   1    3.80    2.50 
   2  17  -1    7.30    2.50 
   1 -17  -1    1.60    3.00 
   1 -17  -1    1.80    1.70 
  -1 -17   1    0.20    1.70 
  -1 -17   1    1.80    3.00 
   1 -17  -1   -1.60    2.70 
   1  17  -1    0.60    2.30 
  -1  17   1    0.90    2.30 
   1  17  -1    0.40    2.70 
   0 -17  -1    2.80    1.70 
   0 -17  -1   -0.50    2.90 
   0 -17  -1    2.70    2.80 
   0 -17   1    2.90    1.80 
   0 -17   1    5.30    3.20 
   0  17  -1    3.10    2.40 
   0  17   1    1.20    2.30 
   0  17  -1   -0.30    2.80 
  -1 -17  -1   12.60    3.50 
   1 -17   1   10.60    3.60 
  -1 -17  -1   12.20    3.10 
   1 -17   1   10.80    2.10 
  -1 -17  -1    8.50    2.00 
  -1  17  -1   12.60    3.50 
  -1  17  -1    6.30    2.50 
   1  17   1    5.40    2.60 
   2 -17   1    8.30    3.50 
  -2 -17  -1    9.50    2.90 
  -2 -17  -1   10.80    2.20 
   2 -17   1    8.00    2.00 
  -2 -17  -1    5.10    3.20 
   2  17   1   10.40    2.70 
  -2  17  -1    8.60    2.60 
  -3 -17  -1   50.19    5.80 
   3 -17   1   46.10    4.50 
   3 -17   1   45.50    5.70 
  -3 -17  -1   44.50    5.10 
  -3  17  -1   36.40    4.60 
   3  17   1   47.60    5.40 
   4 -17   1   14.80    2.30 
  -4 -17  -1   12.00    2.70 
   4 -17   1   13.40    3.80 
  -4 -17  -1   13.90    2.90 
  -4  17  -1   14.70    3.10 
   4  17   1   13.70    3.50 
  -5 -17  -1    0.50    1.70 
  -5 -17  -1    3.40    3.10 
   5 -17   1    1.60    3.30 
  -5 -17  -1    3.20    2.40 
   5 -17   1    2.00    3.20 
   5 -17   1    0.70    1.70 
  -5  17  -1    1.10    2.40 
  -5  17  -1    7.00    1.70 
   5  17   1    1.20    2.50 
   6 -17   1   10.80    4.00 
  -6 -17  -1   20.00    3.90 
  -6 -17  -1   20.20    2.50 
  -6 -17  -1   20.80    3.10 
   6 -17   1   20.30    2.60 
   6 -17   1   22.50    4.30 
  -6  17  -1   16.30    5.80 
  -6  17  -1   20.80    2.60 
   6  17   1   18.90    3.50 
   0 -18   1    5.40    3.20 
   0 -18  -1    0.10    2.90 
 -20   0   2  160.58   11.70 
  20   0  -2  134.69   12.00 
 -20   0   2  112.09   12.30 
 -20   0   2  124.49   11.00 
 -20   0   2  156.68   11.00 
 -19   0   2    1.40    2.10 
  19   0  -2   -0.60    2.70 
 -19   0   2   -1.40    2.10 
 -19   0   2    0.80    3.10 
 -18   0   2   23.60    4.30 
  18   0  -2   37.10    4.50 
 -18   0   2   41.90    4.50 
 -18   0   2   21.60    3.40 
 -17   0   2    1.10    2.30 
  17   0  -2   -0.50    1.30 
 -17   0   2   -1.90    2.70 
  17   0  -2    3.20    2.80 
 -17   0   2   -0.20    2.00 
  16   0  -2  421.36   27.60 
 -16   0   2  332.17   27.50 
 -16   0   2  329.27   26.90 
 -15   0   2    1.30    2.20 
 -15   0   2   -0.80    1.80 
  15   0  -2    0.50    1.70 
 -15   0   2    2.80    2.70 
  15   0  -2    0.40    2.60 
  14   0  -2 1461.55  100.19 
  14   0  -2 1256.67  100.89 
 -13   0   2    2.20    2.40 
 -13   0   2    0.20    1.70 
 -13   0   2    2.70    2.10 
  13   0  -2    0.90    1.90 
  13   0  -2    1.60    2.50 
  12   0  -2   19.30    2.90 
 -12   0   2   11.90    2.80 
  12   0  -2   19.20    3.30 
 -12   0   2   27.50    3.10 
  12   0  -2   20.80    2.10 
 -12   0   2   11.80    2.30 
 -11   0   2    0.70    1.50 
 -11   0   2   -2.60    1.70 
  11   0  -2    0.50    2.20 
 -11   0   2    2.80    2.00 
  11   0  -2   -0.50    1.80 
  10   0  -2  702.23   47.90 
  10   0  -2  701.03   48.30 
 -10   0   2  601.14   47.80 
 -10   0   2  588.44   48.00 
   9   0  -2    1.10    1.60 
  -9   0   2    1.20    1.60 
  -9   0   2    2.50    1.30 
  -9   0   2   -0.80    1.40 
   9   0  -2   -0.70    1.90 
   8   0  -2  179.68   13.80 
  -8   0   2  202.08   13.90 
  -8   0   2  163.48   13.90 
  -8   0   2  175.18   13.70 
   8   0  -2  185.48   14.40 
  -7   0   2   -0.10    1.10 
   7   0  -2    1.00    1.90 
   7   0  -2    0.50    0.90 
  -7   0   2    3.20    1.20 
  -7   0   2    0.40    1.20 
   7   0  -2    2.10    1.30 
  -6   0   2    9.10    1.40 
   6   0  -2    8.20    2.20 
  -6   0   2   13.10    1.50 
  -6   0   2    5.70    1.30 
  -6   0   2   10.80    1.20 
   6   0  -2    9.30    1.30 
   6   0  -2    9.10    1.50 
  -5   0   2   40.20    3.00 
   5   0  -2   30.70    3.00 
  -5   0   2   31.40    2.90 
  -5   0   2   36.70    2.90 
   5   0  -2   29.70    3.00 
  -5   0   2   25.30    3.00 
  -4   0   2  635.44   45.50 
  -4   0   2  604.34   45.50 
   4   0  -2  542.75   45.80 
   4   0  -2  631.44   45.50 
  -4   0   2  568.44   45.40 
   4   0  -2  702.83   45.60 
   4   0  -2  624.14   45.50 
  -4   0   2  600.04   45.40 
   4   0  -2  658.73   45.40 
   3   0  -2   20.90    2.00 
  -3   0   2   16.80    1.80 
  -3   0   2   15.10    1.60 
  -3   0   2   19.10    1.80 
  -3   0   2   18.70    2.20 
  -3   0   2   17.50    1.70 
   3   0  -2   20.40    1.70 
   3   0  -2   23.00    2.10 
   3   0  -2   22.40    1.90 
  -2   0   2    9.60    1.30 
  -2   0   2   10.80    1.20 
   2   0  -2   12.00    1.30 
  -2   0   2   12.20    1.00 
  -2   0   2   13.20    1.30 
  -2   0   2   11.10    1.20 
   2   0  -2   12.70    1.30 
   2   0  -2   12.40    1.00 
  -1   0  -2    2.00    0.40 
  -1   0  -2    1.90    0.30 
  -1   0  -2    1.20    0.30 
   2   0   2 2241.88  163.38 
   2   0   2 2392.46  163.28 
  -2   0  -2 2377.16  163.08 
  -2   0  -2 2042.00  163.28 
   2   0   2 2316.17  163.18 
   2   0   2 2193.98  163.08 
  -2   0  -2 2061.19  163.28 
   3   0   2    3.90    0.60 
  -3   0  -2    4.80    1.00 
   3   0   2    3.90    0.80 
   3   0   2    6.30    1.20 
   3   0   2    2.90    1.10 
   3   0   2    3.10    1.10 
  -3   0  -2    2.90    1.10 
   3   0   2    6.30    0.80 
  -3   0  -2    4.30    0.80 
  -5   0  -2    4.60    1.30 
   5   0   2    3.50    1.50 
  -5   0  -2    4.60    1.30 
  -5   0  -2   10.00    1.20 
   6   0   2 2414.26  177.38 
  -6   0  -2 2242.68  177.78 
   6   0   2 2637.94  177.88 
   6   0   2 2552.14  177.38 
  -6   0  -2 2360.16  177.58 
  -6   0  -2 2351.46  177.68 
   7   0   2    1.40    0.90 
  -7   0  -2   -0.40    1.40 
  -7   0  -2    2.10    1.10 
   7   0   2    0.80    1.40 
  -7   0  -2    7.00    1.60 
   8   0   2  335.77   24.40 
  -8   0  -2  335.27   24.90 
  -8   0  -2  320.87   24.80 
   8   0   2  359.96   25.00 
   8   0   2  310.07   24.30 
  -8   0  -2  320.27   24.50 
  -9   0  -2    2.50    1.50 
   9   0   2    0.60    0.80 
   9   0   2   -0.40    1.70 
  -9   0  -2   -2.30    1.60 
   9   0   2   -0.60    1.10 
  -9   0  -2    0.20    1.70 
  10   0   2   86.29    7.20 
 -10   0  -2   82.79    7.60 
 -10   0  -2   94.79    8.30 
  10   0   2   97.79    7.40 
  10   0   2  109.79    8.40 
 -10   0  -2  105.29    8.20 
 -11   0  -2    2.40    1.70 
 -11   0  -2    0.70    1.90 
 -11   0  -2    1.30    2.00 
  11   0   2    4.60    2.30 
  11   0   2    1.30    0.80 
  11   0   2    0.10    1.30 
  12   0   2   51.19    4.70 
 -12   0  -2   44.60    4.80 
  12   0   2   38.00    3.70 
 -12   0  -2   33.30    3.90 
  12   0   2   29.70    3.30 
 -12   0  -2   27.30    4.10 
 -13   0  -2    1.50    1.80 
  13   0   2    2.60    1.50 
  13   0   2   -0.30    2.20 
 -13   0  -2    4.40    2.50 
  13   0   2    1.00    1.40 
 -13   0  -2    0.70    2.20 
  14   0   2    5.20    1.50 
 -14   0  -2    1.10    2.70 
 -14   0  -2    4.40    2.40 
  14   0   2    2.60    1.10 
 -14   0  -2    3.00    1.90 
 -15   0  -2   -0.40    2.40 
 -15   0  -2    0.70    1.80 
  15   0   2    4.00    2.60 
 -15   0  -2    0.30    2.70 
  16   0   2    8.50    2.80 
 -16   0  -2   11.70    3.20 
 -16   0  -2    8.90    2.10 
 -16   0  -2   12.90    3.00 
  17   0   2    3.00    2.70 
 -17   0  -2   -1.10    2.80 
 -17   0  -2   -1.80    2.70 
 -17   0  -2    0.10    1.60 
  18   0   2   54.89    5.90 
 -18   0  -2   32.90    4.80 
 -18   0  -2   38.60    4.00 
  19   0   2    2.00    3.00 
 -19   0  -2    2.10    3.10 
 -19   0  -2    0.80    2.40 
 -19   0  -2    1.90    1.50 
 -20  -1   2    2.00    2.30 
 -20  -1   2    0.80    2.20 
 -20  -1   2    2.60    3.40 
  20  -1  -2   -0.80    2.80 
  20   1  -2    2.90    3.20 
 -20   1   2    2.70    3.30 
 -20   1   2    1.00    1.40 
  19  -1  -2    1.50    2.80 
 -19  -1   2    2.30    3.20 
 -19  -1   2   -0.20    2.30 
 -19   1   2    0.70    1.60 
 -19   1   2   -1.90    1.60 
  19   1  -2    2.40    3.10 
 -19   1   2    2.60    3.20 
 -19   1   2    2.60    2.10 
 -18  -1   2   20.40    4.10 
  18  -1  -2   27.60    4.00 
 -18  -1   2   20.20    3.30 
 -18  -1   2   36.70    3.80 
 -18   1   2   28.40    3.00 
 -18   1   2   21.10    4.00 
  18   1  -2   25.60    4.10 
 -18   1   2   18.80    2.90 
 -18   1   2   29.80    3.50 
 -17  -1   2   -1.90    2.80 
  17  -1  -2    1.80    1.80 
  17  -1  -2    5.30    2.80 
 -17  -1   2   -0.80    2.20 
 -17  -1   2    0.50    2.20 
 -17   1   2    2.10    2.90 
  17   1  -2    0.60    2.90 
 -17   1   2    2.00    1.90 
 -17   1   2   -0.70    2.20 
 -17   1   2    0.10    1.90 
  16  -1  -2  129.09   11.00 
 -16  -1   2  122.19   11.10 
 -16  -1   2  118.09   10.40 
  16   1  -2  157.58   11.20 
 -16   1   2  114.49   11.10 
 -16   1   2  121.69   10.10 
  15  -1  -2   14.80    2.60 
 -15  -1   2   20.20    2.90 
 -15  -1   2   10.10    3.00 
  15  -1  -2   12.40    3.00 
 -15  -1   2    8.30    2.40 
 -15   1   2    8.20    3.20 
  15   1  -2   10.80    3.10 
 -15   1   2   10.40    2.20 
  14  -1  -2  266.57   21.60 
  14  -1  -2  259.07   22.10 
 -14  -1   2  318.97   21.60 
  14   1  -2  277.37   21.10 
  13  -1  -2  171.18   12.80 
 -13  -1   2  137.49   13.10 
  13  -1  -2  175.98   13.40 
 -13  -1   2  141.99   12.60 
 -13   1   2  143.99   13.10 
  13   1  -2  198.98   13.50 
  13   1  -2  192.18   12.50 
 -13   1   2  139.39   12.40 
  12  -1  -2   83.89    7.00 
 -12  -1   2   72.89    7.20 
 -12  -1   2   69.29    6.80 
  12  -1  -2   80.79    7.50 
 -12   1   2   70.59    7.20 
  12   1  -2   94.69    6.80 
  12   1  -2   90.79    7.70 
 -12   1   2   66.49    6.50 
 -11  -1   2   18.80    2.70 
  11  -1  -2   15.00    3.10 
 -11  -1   2   15.70    2.80 
  11  -1  -2   23.70    2.90 
 -11   1   2   17.30    2.30 
  11   1  -2   23.60    2.70 
 -11   1   2   16.30    2.80 
  11   1  -2   18.30    3.10 
 -10  -1   2   61.79    6.40 
 -10  -1   2   84.79    6.30 
 -10  -1   2   66.79    6.10 
  10  -1  -2   69.99    6.20 
  10  -1  -2   64.49    7.10 
  10   1  -2   81.79    6.30 
 -10   1   2   63.29    6.40 
 -10   1   2   61.99    5.80 
  10   1  -2   83.69    7.00 
  -9  -1   2   41.50    4.10 
   9  -1  -2   40.80    4.20 
   9  -1  -2   39.40    4.80 
  -9  -1   2   43.30    4.10 
  -9   1   2   39.00    3.80 
  -9   1   2   37.20    4.40 
   9   1  -2   43.20    4.30 
  -9   1   2   53.69    4.50 
   9   1  -2   50.19    5.10 
   9   1  -2   37.90    3.50 
  -8  -1   2   10.70    1.70 
  -8  -1   2    8.60    1.20 
   8  -1  -2    8.90    1.80 
  -8  -1   2    8.30    1.60 
  -8  -1   2    6.70    1.70 
   8   1  -2   10.30    1.00 
  -8   1   2   10.60    1.90 
   8   1  -2   10.60    1.90 
  -8   1   2   12.70    2.10 
  -8   1   2    8.30    1.50 
   8   1  -2   12.10    2.30 
   7  -1  -2  161.98   12.10 
  -7  -1   2  164.58   12.10 
  -7  -1   2  168.38   12.10 
  -7  -1   2  142.19   11.80 
   7  -1  -2  156.48   11.90 
   7   1  -2  155.08   12.10 
  -7   1   2  152.48   12.20 
  -7   1   2  159.38   11.90 
  -7   1   2  164.68   12.50 
  -7   1   2  147.99   12.10 
   7   1  -2  164.18   11.70 
   6  -1  -2   14.90    1.80 
   6  -1  -2   12.20    1.70 
  -6  -1   2   16.00    1.90 
   6  -1  -2   14.30    1.70 
  -6  -1   2   14.70    1.70 
   6   1  -2   15.00    1.70 
   6   1  -2   14.90    1.90 
  -6   1   2   12.50    2.10 
   6   1  -2   16.50    1.30 
  -6   1   2   10.20    1.50 
  -6   1   2   13.10    1.80 
   6   1  -2    7.60    1.80 
   5  -1  -2  120.79    9.10 
  -5  -1   2  121.49    9.00 
  -5  -1   2  124.39    8.90 
   5  -1  -2  126.89    9.00 
  -5  -1   2  130.99    9.20 
  -5   1   2  112.49    9.10 
   5   1  -2  125.89    9.10 
   5   1  -2  111.79    9.40 
   5   1  -2  112.99    9.20 
  -5   1   2  126.19    9.60 
  -5   1   2   97.09    9.00 
  -5   1   2  115.19    9.00 
  -4  -1   2   86.79    6.50 
   4  -1  -2   86.89    6.50 
   4  -1  -2   77.49    6.50 
   4  -1  -2   86.59    6.60 
  -4  -1   2   80.59    6.40 
  -4  -1   2   87.69    6.60 
  -4  -1   2   81.39    6.50 
   4  -1  -2   74.49    6.70 
   4  -1  -2   81.09    6.40 
  -4   1   2   86.29    6.90 
  -4   1   2   84.69    6.50 
   4   1  -2   86.49    6.60 
   4   1  -2   72.99    6.50 
  -4   1   2   90.49    6.50 
   4   1  -2   82.09    6.50 
   4   1  -2   93.79    6.30 
  -3  -1   2   36.30    3.40 
  -3  -1   2   46.60    3.10 
   3  -1  -2   36.50    3.40 
  -3  -1   2   43.80    3.40 
  -3  -1   2   39.30    3.30 
   3  -1  -2   39.80    3.20 
   3  -1  -2   40.50    3.30 
  -3   1   2   39.50    3.30 
  -3   1   2   41.30    3.40 
   3   1  -2   43.10    3.40 
   3   1  -2   37.80    3.40 
  -3   1   2   37.10    3.30 
   3   1  -2   46.50    3.20 
   3   1  -2   49.50    3.50 
  -3   1   2   37.40    3.20 
  -2  -1   2    2.50    0.50 
  -2  -1   2    0.50    0.50 
   2  -1  -2    1.40    0.40 
  -2  -1   2    1.10    0.50 
  -2  -1   2    1.70    0.60 
   2  -1  -2    1.20    0.40 
   2  -1  -2    1.10    0.60 
   2  -1  -2    1.30    0.20 
  -2  -1   2    0.60    0.40 
   2  -1  -2    0.90    0.20 
   2  -1  -2    1.20    0.50 
  -2  -1   2    1.10    0.30 
  -2   1   2    1.70    0.60 
  -2   1   2    0.90    0.50 
   2   1  -2    0.90    0.50 
   2   1  -2    1.50    0.50 
   2   1  -2    0.40    0.30 
  -2   1   2    1.30    0.50 
   2   1  -2    1.40    0.50 
  -2   1   2    1.10    0.50 
   2   1  -2    0.20    0.50 
  -2   1   2    1.20    0.50 
  -1  -1   2    3.00    0.60 
   1  -1  -2    2.30    0.40 
  -1  -1   2    2.20    0.40 
  -1  -1   2    2.60    0.30 
   1   1  -2    2.60    0.40 
   1   1  -2    1.90    0.30 
  -1   1   2    4.30    0.70 
  -1   1   2    4.30    0.40 
   1   1  -2    2.60    0.40 
  -1   1   2    2.30    0.40 
  -1   1   2    1.60    0.50 
   0  -1  -2    4.80    0.60 
   0  -1  -2    3.60    0.50 
   0   1  -2    4.70    0.40 
   0   1  -2    3.90    0.40 
   0   1   2    2.80    0.50 
   0   1   2    6.90    0.70 
   0   1   2    4.70    0.50 
  -1  -1  -2    8.70    0.70 
  -1  -1  -2    8.40    0.90 
  -1  -1  -2    7.30    0.80 
  -1  -1  -2    7.60    0.80 
  -1   1  -2    7.70    0.90 
   1   1   2   11.00    1.10 
  -1   1  -2    8.30    1.00 
   1   1   2    8.30    1.00 
   1   1   2    9.80    0.90 
   1   1   2    5.60    0.70 
  -1   1  -2    8.30    0.80 
  -1   1  -2    7.70    0.80 
   2  -1   2    4.10    0.70 
   2  -1   2    2.00    0.70 
  -2  -1  -2    2.90    0.60 
   2  -1   2    5.00    0.70 
  -2  -1  -2    3.50    0.80 
   2  -1   2    6.90    0.90 
  -2  -1  -2    3.40    0.80 
  -2  -1  -2    2.40    0.70 
  -2   1  -2    3.50    0.90 
   2   1   2    4.60    0.80 
   2   1   2    7.00    0.90 
  -2   1  -2    2.90    0.70 
   2   1   2    3.50    0.50 
   2   1   2    4.50    0.70 
  -2   1  -2    3.00    0.70 
  -2   1  -2    2.40    0.80 
   2   1   2    6.00    0.90 
   3  -1   2  322.57   21.60 
  -3  -1  -2  307.87   21.90 
  -3  -1  -2  258.87   21.80 
   3  -1   2  292.47   21.90 
  -3  -1  -2  319.37   21.90 
   3  -1   2  290.47   21.80 
  -3   1  -2  244.58   21.90 
   3   1   2  321.37   21.90 
  -3   1  -2  334.87   21.70 
  -3   1  -2  309.37   21.80 
   3   1   2  275.77   21.90 
  -3   1  -2  254.97   21.90 
   3   1   2  292.47   21.90 
  -4  -1  -2   44.50    4.30 
   4  -1   2   53.99    4.60 
   4  -1   2   58.59    4.40 
  -4  -1  -2   49.80    4.20 
   4  -1   2   45.60    4.10 
  -4   1  -2   49.99    4.10 
  -4   1  -2   57.19    3.90 
   4   1   2   53.49    4.30 
  -4   1  -2   44.60    4.40 
   4   1   2   43.30    4.30 
  -4   1  -2   49.90    4.30 
  -5  -1  -2  224.38   18.80 
  -5  -1  -2  252.17   18.80 
   5  -1   2  257.17   18.50 
  -5  -1  -2  260.67   18.70 
  -5   1  -2  241.58   18.60 
  -5   1  -2  262.17   18.50 
   6  -1   2  126.49    8.90 
  -6  -1  -2  128.59    9.10 
  -6  -1  -2  100.49    9.20 
  -6  -1  -2  119.39    9.30 
   6   1   2   98.69    9.30 
  -6   1  -2  119.49    9.30 
  -6   1  -2  118.79    8.90 
   7  -1   2  327.07   22.30 
   7  -1   2  307.37   22.20 
   7  -1   2  301.27   22.90 
  -7  -1  -2  284.97   22.60 
  -7  -1  -2  274.27   22.90 
  -7  -1  -2  299.67   22.60 
   7   1   2  292.27   22.60 
  -7   1  -2  304.97   22.60 
  -7   1  -2  309.77   22.20 
  -7   1  -2  269.47   22.60 
   7   1   2  310.07   22.00 
   8  -1   2  209.58   15.50 
   8  -1   2  204.68   14.90 
  -8  -1  -2  197.58   15.30 
  -8  -1  -2  196.38   15.10 
  -8  -1  -2  195.48   15.30 
  -8   1  -2  193.98   14.80 
   8   1   2  206.08   14.80 
  -8   1  -2  197.58   15.30 
   8   1   2  187.18   14.60 
   8   1   2  205.98   15.40 
  -8   1  -2  182.38   15.30 
   9  -1   2  157.48   11.80 
   9  -1   2  158.28   12.40 
  -9  -1  -2  149.99   12.30 
  -9  -1  -2  161.88   12.30 
  -9  -1  -2  153.08   12.00 
  -9   1  -2  142.19   12.30 
   9   1   2  144.89   11.40 
   9   1   2  164.08   12.40 
  -9   1  -2  161.98   12.40 
  -9   1  -2  149.29   11.80 
   9   1   2  159.18   11.70 
  10  -1   2  115.79    9.50 
 -10  -1  -2  105.69   10.10 
  10  -1   2  126.69   10.30 
 -10  -1  -2  124.29    9.90 
 -10  -1  -2  130.39   10.10 
 -10   1  -2  149.39   10.40 
  10   1   2  113.29    9.10 
  10   1   2  134.69    9.40 
 -10   1  -2  105.69   10.10 
 -10   1  -2  121.69    9.60 
  10   1   2  130.79   10.30 
  11  -1   2   12.90    2.90 
 -11  -1  -2   13.10    2.40 
  11  -1   2   13.50    2.10 
 -11  -1  -2   13.00    2.90 
 -11  -1  -2   20.00    2.90 
  11   1   2   16.90    3.00 
 -11   1  -2   14.90    2.10 
 -11   1  -2    8.20    2.70 
 -11   1  -2   24.60    3.30 
 -12  -1  -2   18.70    3.40 
 -12  -1  -2   23.20    3.20 
 -12  -1  -2   22.50    3.10 
  12  -1   2   22.70    2.60 
  12  -1   2   18.00    3.00 
 -12   1  -2   20.80    3.30 
 -12   1  -2   35.80    3.80 
  12   1   2   18.40    3.30 
 -12   1  -2   21.90    2.60 
 -13  -1  -2   -2.10    2.40 
 -13  -1  -2    0.00    1.90 
 -13  -1  -2    1.90    2.20 
  13  -1   2    1.00    1.60 
  13  -1   2    1.20    2.30 
 -13   1  -2   -0.60    2.30 
 -13   1  -2    3.10    2.60 
 -13   1  -2    0.10    1.50 
  13   1   2   -0.30    2.30 
 -14  -1  -2  153.08   13.80 
  14  -1   2  188.58   13.00 
 -14  -1  -2  201.78   13.70 
 -14  -1  -2  158.98   13.20 
  14   1   2  176.48   13.90 
 -14   1  -2  148.19   13.80 
 -14   1  -2  147.69   12.80 
 -15  -1  -2    0.60    2.30 
  15  -1   2    0.10    2.40 
 -15  -1  -2   -0.20    2.00 
 -15  -1  -2   -0.30    2.70 
  15  -1   2    1.20    1.70 
 -15   1  -2    0.60    2.80 
 -15   1  -2    4.00    2.60 
 -15   1  -2    3.00    1.60 
  15   1   2    1.10    2.60 
 -16  -1  -2   95.79    9.30 
 -16  -1  -2   95.39    8.40 
  16  -1   2  105.59    9.00 
 -16   1  -2   98.89    9.40 
 -16   1  -2   90.19    7.90 
  16   1   2  124.49    9.30 
  17  -1   2   -0.80    2.50 
 -17  -1  -2    0.80    2.50 
 -17  -1  -2    1.30    1.90 
 -17  -1  -2   -0.90    2.80 
 -17   1  -2    1.90    2.80 
 -17   1  -2    0.80    1.30 
  17   1   2    0.70    2.80 
 -17   1  -2   -0.40    2.50 
 -18  -1  -2    3.10    2.60 
  18  -1   2    2.10    2.50 
 -18  -1  -2    4.10    3.10 
 -18  -1  -2    3.90    2.00 
 -18   1  -2    5.50    3.20 
  18   1   2    5.20    3.10 
 -18   1  -2    2.40    2.50 
  19  -1   2    7.40    3.00 
 -19  -1  -2    4.30    3.10 
 -19  -1  -2    4.50    2.70 
  19   1   2    3.10    4.30 
 -19   1  -2    3.10    3.10 
 -19   1  -2    4.70    2.50 
 -19  -2   2    5.30    2.80 
  19  -2  -2    4.60    2.90 
 -19  -2   2    4.10    3.40 
 -19  -2   2    4.40    2.50 
  19   2  -2    4.80    3.30 
 -19   2   2    6.10    3.30 
 -19   2   2    3.50    1.90 
  18  -2  -2  139.79   10.30 
  18  -2  -2  115.49   11.10 
 -18  -2   2  141.29   11.10 
 -18  -2   2   99.59   11.30 
 -18  -2   2  102.19   10.50 
 -18   2   2   98.19   11.20 
  18   2  -2  142.59   11.60 
 -18   2   2  136.59    9.80 
 -18   2   2  145.49   10.40 
 -17  -2   2   10.50    3.40 
 -17  -2   2   25.00    3.30 
  17  -2  -2   15.80    3.60 
 -17  -2   2   16.10    3.10 
  17  -2  -2   18.30    3.00 
  17  -2  -2   20.90    2.10 
 -17   2   2   24.50    3.10 
 -17   2   2   19.60    2.40 
  17   2  -2   20.90    3.80 
 -17   2   2   10.50    3.50 
 -16  -2   2  503.65   41.30 
  16  -2  -2  593.04   41.70 
 -16  -2   2  529.15   41.70 
  16   2  -2  684.33   42.00 
 -16   2   2  505.65   41.70 
 -16   2   2  527.85   41.00 
 -15  -2   2  106.99    9.40 
  15  -2  -2  114.29    9.90 
 -15  -2   2  100.29    9.90 
  15  -2  -2  127.39    9.50 
 -15   2   2   99.59    9.90 
 -15   2   2  100.99    8.90 
  15   2  -2  136.39   10.30 
  14  -2  -2 1311.47   82.09 
 -14  -2   2 1040.30   82.49 
 -14   2   2 1024.40   83.69 
  14   2  -2 1065.89   81.49 
 -13  -2   2   47.90    5.80 
  13  -2  -2   56.89    5.40 
 -13  -2   2   52.59    5.30 
  13  -2  -2   45.60    5.50 
 -13   2   2   45.30    5.40 
 -13   2   2   49.80    4.70 
  13   2  -2   60.59    4.40 
  13   2  -2   69.99    6.50 
  13   2  -2   46.10    4.20 
 -12  -2   2   21.60    2.80 
  12  -2  -2   30.50    4.00 
 -12  -2   2   11.90    2.80 
 -12  -2   2   12.30    2.50 
  12  -2  -2   22.30    2.80 
 -12   2   2   14.00    2.90 
 -12   2   2   12.90    2.10 
  12   2  -2   20.60    3.40 
  12   2  -2   13.10    1.70 
  12   2  -2   21.30    2.10 
 -11  -2   2   75.29    5.70 
  11  -2  -2   62.89    6.10 
 -11  -2   2   55.39    5.90 
 -11  -2   2   61.59    5.60 
  11  -2  -2   59.29    6.70 
 -11   2   2   53.99    5.90 
 -11   2   2   53.69    5.10 
  11   2  -2   66.49    5.10 
  11   2  -2   50.89    4.70 
  11   2  -2   64.19    6.50 
  10  -2  -2  297.67   21.30 
 -10  -2   2  280.77   21.50 
 -10  -2   2  282.17   21.40 
 -10   2   2  278.17   21.50 
 -10   2   2  266.07   21.00 
  10   2  -2  317.17   21.80 
  10   2  -2  246.18   20.80 
  10   2  -2  296.37   21.00 
  -9  -2   2   52.99    5.10 
   9  -2  -2   62.99    5.20 
  -9  -2   2   52.69    5.30 
  -9  -2   2   67.59    5.10 
  -9  -2   2   44.40    4.30 
  -9   2   2   54.09    4.60 
   9   2  -2   53.39    4.80 
  -9   2   2   63.59    5.20 
  -9   2   2   54.39    5.30 
   9   2  -2   52.79    5.80 
  -9   2   2   67.79    5.70 
  -8  -2   2    1.90    0.70 
   8  -2  -2    3.90    1.30 
  -8  -2   2    1.10    1.40 
  -8  -2   2    0.70    1.20 
   8  -2  -2    0.60    1.50 
  -8  -2   2    1.40    1.40 
   8   2  -2    1.40    1.10 
  -8   2   2    2.30    1.30 
   8   2  -2    3.70    2.00 
  -8   2   2    1.10    1.50 
  -8   2   2    0.70    1.80 
  -8   2   2    0.70    1.00 
  -7  -2   2   43.90    4.20 
   7  -2  -2   42.80    4.20 
  -7  -2   2   49.80    3.70 
  -7  -2   2   48.40    4.30 
   7  -2  -2   45.60    3.90 
  -7  -2   2   47.20    4.00 
  -7   2   2   49.70    4.80 
  -7   2   2   49.00    4.20 
  -7   2   2   35.70    4.00 
  -7   2   2   39.60    3.70 
  -6  -2   2   29.90    2.80 
  -6  -2   2   27.10    2.90 
  -6  -2   2   28.20    3.00 
   6  -2  -2   29.00    2.60 
  -6  -2   2   27.30    2.40 
   6  -2  -2   28.20    3.00 
  -6   2   2   21.30    2.90 
  -6   2   2   25.00    2.60 
  -6   2   2   28.30    2.90 
  -6   2   2   26.60    2.70 
  -6   2   2   33.20    2.50 
   6   2  -2   25.40    2.70 
   6   2  -2   21.40    3.00 
  -5  -2   2  259.27   17.80 
   5  -2  -2  249.08   18.00 
   5  -2  -2  220.48   17.70 
  -5  -2   2  245.68   17.90 
  -5  -2   2  253.67   18.00 
  -5  -2   2  238.38   17.90 
   5   2  -2  205.18   18.00 
  -5   2   2  277.37   17.80 
   5   2  -2  210.78   17.80 
  -5   2   2  245.68   17.90 
  -5   2   2  217.08   17.70 
  -5   2   2  236.28   17.80 
  -5   2   2  253.87   18.10 
   4  -2  -2  656.63   48.50 
   4  -2  -2  684.33   48.50 
  -4  -2   2  645.94   48.20 
   4  -2  -2  628.24   48.30 
   4  -2  -2  592.94   48.40 
  -4  -2   2  703.93   48.60 
  -4  -2   2  646.14   48.50 
  -4  -2   2  647.04   48.40 
  -4  -2   2  639.34   48.40 
  -4   2   2  653.43   48.40 
  -4   2   2  594.24   48.30 
   4   2  -2  641.64   48.60 
   4   2  -2  662.13   48.50 
   4   2  -2  758.22   48.40 
   4   2  -2  637.24   48.40 
  -4   2   2  708.83   48.60 
  -4   2   2  621.44   48.40 
   4   2  -2  601.44   48.50 
   4   2  -2  734.73   48.60 
  -4   2   2  732.33   48.40 
   3  -2  -2   28.00    2.40 
   3  -2  -2   31.00    2.50 
   3  -2  -2   25.60    2.30 
  -3  -2   2   25.60    2.30 
   3  -2  -2   24.30    2.70 
  -3  -2   2   30.00    2.60 
  -3  -2   2   25.40    2.20 
   3  -2  -2   27.00    2.20 
   3  -2  -2   26.30    2.30 
   3   2  -2   24.70    2.70 
   3   2  -2   29.40    2.50 
  -3   2   2   20.80    2.30 
  -3   2   2   25.30    2.50 
   3   2  -2   30.70    2.50 
  -3   2   2   26.30    2.30 
   3   2  -2   34.50    2.80 
  -2  -2   2   19.70    1.80 
  -2  -2   2   13.80    1.90 
   2  -2  -2   19.90    1.80 
  -2  -2   2   20.60    2.20 
   2  -2  -2   21.10    2.10 
  -2  -2   2   19.30    1.80 
   2  -2  -2   19.50    1.80 
  -2  -2   2   21.60    2.10 
   2  -2  -2   20.00    1.80 
  -2  -2   2   20.30    1.70 
   2   2  -2   21.50    1.90 
   2   2  -2   21.30    1.70 
   2   2  -2   24.50    2.10 
  -2   2   2   24.40    1.90 
  -2   2   2   21.30    1.80 
   2   2  -2   18.80    2.00 
   2   2  -2   16.30    1.90 
  -2   2   2   22.10    1.70 
  -2   2   2   19.00    1.80 
   1  -2  -2   83.29    7.00 
  -1  -2   2   99.69    7.00 
   1  -2  -2  103.79    7.00 
   1  -2  -2  108.69    7.10 
   1  -2  -2   90.39    6.90 
  -1  -2   2   96.49    7.00 
   1  -2  -2   84.59    6.90 
  -1  -2   2   98.29    7.00 
   1  -2  -2   86.29    7.10 
   1  -2  -2   84.49    7.20 
   1   2  -2  103.99    7.00 
   1   2  -2   85.59    7.00 
   1   2  -2  103.99    7.20 
   1   2  -2   96.39    7.10 
  -1   2   2   87.29    7.00 
   1   2  -2   87.89    6.90 
  -1   2   2  102.59    7.10 
   0  -2  -2  344.27   24.20 
   0  -2   2  318.87   24.30 
   0  -2   2  352.76   24.20 
   0  -2  -2  300.37   24.20 
   0  -2   2  357.96   24.20 
   0  -2  -2  291.57   24.30 
   0  -2   2  345.97   24.30 
   0  -2  -2  361.46   24.30 
   0  -2  -2  326.97   24.30 
   0  -2   2  308.47   24.30 
   0   2  -2  289.77   24.20 
   0   2   2  341.77   24.20 
   0   2  -2  321.97   24.30 
   0   2  -2  340.97   24.10 
   0   2   2  318.77   24.20 
   0   2  -2  329.27   24.30 
   0   2   2  311.67   24.30 
   0   2   2  351.16   24.20 
   0   2  -2  346.47   24.20 
   1  -2   2   19.40    1.60 
  -1  -2  -2   19.40    1.70 
  -1  -2  -2   16.80    1.60 
   1  -2   2   17.10    1.60 
   1  -2   2   17.90    1.90 
   1  -2   2   18.20    1.70 
   1  -2   2   19.00    1.60 
  -1   2  -2   18.90    1.60 
   1   2   2   21.10    1.70 
  -1   2  -2   20.20    1.60 
   1   2   2   21.50    1.80 
   1   2   2   21.40    2.00 
   1   2   2   15.60    2.00 
   2  -2   2  879.51   62.39 
   2  -2   2  892.31   62.49 
  -2  -2  -2  832.92   62.29 
   2  -2   2  785.72   62.39 
  -2  -2  -2  820.92   62.19 
   2  -2   2  891.31   62.29 
  -2  -2  -2  786.82   62.39 
  -2  -2  -2  896.81   62.39 
  -2  -2  -2  829.02   62.29 
  -2  -2  -2  843.92   62.49 
  -2   2  -2  865.81   62.39 
  -2   2  -2  883.01   62.39 
  -2   2  -2  884.21   62.29 
   2   2   2  861.11   62.39 
  -2   2  -2  794.82   62.39 
   2   2   2  887.41   62.39 
   2   2   2  830.02   62.29 
  -3  -2  -2  232.38   20.20 
   3  -2   2  276.87   20.30 
  -3  -2  -2  268.67   20.00 
  -3  -2  -2  283.47   20.40 
   3  -2   2  263.67   20.30 
   3  -2   2  269.87   20.20 
   3  -2   2  273.07   20.30 
  -3  -2  -2  300.17   20.30 
  -3   2  -2  251.57   20.30 
  -3   2  -2  281.87   20.30 
   3   2   2  288.17   20.40 
  -3   2  -2  276.77   20.30 
   3   2   2  271.37   20.30 
   3   2   2  274.57   20.40 
   3   2   2  274.97   20.10 
  -3   2  -2  290.57   20.30 
   4  -2   2 5071.19  381.56 
  -4  -2  -2 4912.61  381.76 
   4  -2   2 5054.59  381.66 
   4  -2   2 5441.76  381.76 
   4  -2   2 5205.48  381.56 
  -4   2  -2 5548.35  381.66 
  -4   2  -2 5028.70  381.76 
  -4   2  -2 5245.58  381.56 
   4   2   2 5475.45  381.36 
  -5  -2  -2  316.77   21.90 
  -5  -2  -2  321.57   21.90 
  -5  -2  -2  281.97   21.90 
   5  -2   2  304.77   21.70 
  -5   2  -2  283.97   21.70 
  -5   2  -2  249.58   21.90 
   5   2   2  274.67   21.90 
  -5   2  -2  295.67   21.80 
  -5   2  -2  290.37   22.00 
   5   2   2  299.37   21.50 
  -6  -2  -2  704.23   54.09 
  -6  -2  -2  778.42   54.09 
  -6  -2  -2  769.92   54.09 
   6   2   2  617.44   54.09 
  -6   2  -2  736.43   53.89 
  -6   2  -2  776.02   54.19 
   6   2   2  739.03   53.69 
  -6   2  -2  743.63   54.09 
  -7  -2  -2   47.50    4.60 
   7   2   2   38.40    4.90 
  -7   2  -2   48.90    4.30 
  -7   2  -2   54.99    3.90 
  -7   2  -2   48.10    4.80 
  -7   2  -2   53.79    4.70 
  -7   2  -2   38.10    4.70 
   8  -2   2  361.36   24.60 
  -8  -2  -2  348.67   24.80 
  -8  -2  -2  342.37   24.90 
  -8   2  -2  352.76   24.30 
  -8   2  -2  315.97   24.80 
   8   2   2  298.47   24.80 
  -8   2  -2  272.97   24.80 
   9  -2   2    7.00    2.50 
  -9  -2  -2    9.80    2.20 
  -9  -2  -2   10.40    2.00 
  -9  -2  -2    8.00    2.00 
   9  -2   2    7.70    1.80 
   9   2   2    8.80    2.50 
  -9   2  -2    9.60    1.40 
  -9   2  -2    8.00    2.30 
  -9   2  -2    8.00    2.30 
 -10  -2  -2   10.00    2.30 
  10  -2   2   13.90    2.90 
 -10  -2  -2    8.40    2.30 
 -10  -2  -2   12.50    2.40 
  10  -2   2    9.10    1.90 
  10   2   2    9.10    2.50 
 -10   2  -2   12.50    1.60 
 -10   2  -2   14.70    2.70 
 -10   2  -2    9.20    2.50 
 -11  -2  -2   27.80    3.50 
 -11  -2  -2   29.00    3.70 
 -11  -2  -2   25.10    3.30 
  11  -2   2   25.00    3.00 
  11  -2   2   28.80    3.70 
 -11   2  -2   28.30    2.90 
 -11   2  -2   23.60    3.40 
  11   2   2   27.10    3.80 
 -11   2  -2   32.50    4.00 
 -12  -2  -2  212.48   14.50 
 -12  -2  -2  175.88   14.20 
  12  -2   2  180.78   14.50 
 -12  -2  -2  171.48   14.50 
  12  -2   2  175.08   13.90 
 -12   2  -2  174.88   13.60 
 -12   2  -2  160.18   14.50 
  12   2   2  200.78   14.60 
 -13  -2  -2  241.18   19.80 
 -13  -2  -2  304.87   20.10 
  13  -2   2  241.78   20.00 
 -13  -2  -2  232.38   20.10 
  13  -2   2  269.67   20.00 
 -13   2  -2  236.78   20.10 
 -13   2  -2  243.38   19.20 
  13   2   2  303.57   20.30 
 -14  -2  -2   44.30    4.80 
 -14  -2  -2   28.30    3.90 
  14  -2   2   35.70    4.00 
 -14  -2  -2   30.60    4.40 
 -14   2  -2   24.60    4.10 
  14   2   2   44.90    4.80 
  15  -2   2   80.19    6.90 
 -15  -2  -2   71.19    7.20 
 -15  -2  -2   78.39    7.50 
  15  -2   2   76.89    7.60 
 -15  -2  -2   64.69    7.80 
 -15   2  -2  102.69    7.90 
  15   2   2   94.89    8.20 
 -15   2  -2   61.59    7.80 
  16  -2   2   49.80    5.50 
  16  -2   2   63.09    5.30 
 -16  -2  -2   62.99    6.70 
 -16  -2  -2   50.29    5.80 
 -16  -2  -2   41.30    5.50 
 -16   2  -2   34.80    5.60 
 -16   2  -2   68.69    6.10 
  16   2   2   49.80    5.60 
  17  -2   2   45.70    4.80 
 -17  -2  -2   31.00    4.20 
  17  -2   2   39.90    4.70 
 -17  -2  -2   34.50    5.00 
 -17  -2  -2   45.20    5.30 
 -17   2  -2   56.49    5.60 
  17   2   2   39.80    5.00 
 -17   2  -2   31.30    4.90 
 -18  -2  -2    5.50    2.60 
 -18  -2  -2    3.70    2.20 
  18  -2   2    5.90    2.80 
 -18  -2  -2    6.90    3.30 
 -18   2  -2    0.10    2.90 
 -18   2  -2    5.30    2.60 
  18   2   2    5.80    3.10 
 -19  -2  -2   35.80    4.50 
  19  -2   2   38.60    5.00 
 -19  -2  -2   35.10    4.90 
 -19   2  -2   49.70    5.20 
  19   2   2   45.80    6.50 
 -19   2  -2   31.00    4.70 
  19  -3  -2    1.20    3.40 
  19  -3  -2    2.10    2.90 
 -19  -3   2    1.00    5.20 
 -19  -3   2    0.00    2.30 
 -19   3   2    2.50    1.50 
 -19   3   2   -1.00    3.10 
  19   3  -2    5.20    5.20 
  18  -3  -2   14.80    2.90 
 -18  -3   2   12.60    2.90 
 -18  -3   2    6.80    3.50 
 -18  -3   2    9.20    2.90 
  18  -3  -2   11.20    3.30 
 -18   3   2   13.00    2.30 
 -18   3   2   11.80    3.50 
  18   3  -2   12.80    3.90 
  17  -3  -2   -0.10    2.60 
 -17  -3   2    2.00    2.30 
 -17  -3   2   -0.50    2.80 
 -17  -3   2    0.20    2.40 
  17  -3  -2    1.40    2.40 
 -17   3   2   -0.90    1.70 
  17   3  -2    1.40    3.30 
 -17   3   2   -1.60    2.70 
  16  -3  -2  111.09    9.30 
 -16  -3   2   95.49    9.30 
  16  -3  -2   88.79    9.50 
 -16  -3   2   95.99    9.70 
 -16  -3   2  122.89    9.30 
 -16   3   2   88.49    9.70 
  16   3  -2  109.79   10.10 
 -16   3   2  125.49    8.90 
 -15  -3   2    0.40    2.10 
  15  -3  -2    1.60    2.30 
 -15  -3   2    2.10    2.30 
  15  -3  -2    1.40    2.70 
 -15  -3   2    2.50    2.60 
 -15   3   2    0.10    1.30 
 -15   3   2   -0.60    1.40 
  15   3  -2   -1.20    2.90 
 -15   3   2    3.20    1.90 
 -15   3   2   -0.40    2.50 
 -14  -3   2  109.19   10.70 
  14  -3  -2  135.59   10.80 
 -14  -3   2  103.39   11.00 
  14  -3  -2  112.19   11.30 
 -14  -3   2  141.59   10.80 
 -14   3   2  110.89   10.20 
 -14   3   2  146.29   10.20 
 -14   3   2  160.58   10.60 
  14   3  -2  147.59   11.70 
 -13  -3   2  147.49   10.60 
 -13  -3   2  116.39   10.50 
  13  -3  -2  117.79   11.30 
  13  -3  -2  135.39   10.50 
 -13  -3   2  118.59   10.70 
 -13   3   2  109.89    9.80 
  13   3  -2  147.69   11.30 
 -13   3   2  110.59   10.70 
 -13   3   2  143.09   10.00 
  12  -3  -2   19.70    2.90 
 -12  -3   2   23.10    3.00 
 -12  -3   2   14.30    2.90 
 -12  -3   2   14.80    2.80 
  12   3  -2   16.30    1.90 
  12   3  -2   18.90    2.00 
 -12   3   2   19.20    2.30 
 -12   3   2   21.90    2.70 
 -12   3   2   11.60    2.80 
 -12   3   2   16.90    2.10 
  12   3  -2   15.30    3.20 
 -11  -3   2    1.90    1.80 
  11  -3  -2    3.00    2.00 
 -11  -3   2    4.20    2.20 
 -11  -3   2    1.00    1.80 
  11   3  -2    4.20    1.10 
 -11   3   2    1.50    1.60 
 -11   3   2    3.50    2.10 
  11   3  -2    3.80    2.60 
 -11   3   2   -1.00    2.10 
  11   3  -2    2.90    0.80 
 -11   3   2    0.50    1.30 
 -11   3   2    2.10    1.20 
 -10  -3   2   20.80    3.10 
  10  -3  -2   23.10    3.10 
 -10  -3   2   30.60    3.20 
 -10  -3   2   28.10    3.40 
 -10  -3   2   21.40    2.20 
 -10   3   2   21.90    2.60 
 -10   3   2   22.70    2.60 
 -10   3   2   31.10    3.80 
 -10   3   2   27.90    3.40 
  10   3  -2   31.10    2.70 
 -10   3   2   32.30    3.40 
  -9  -3   2    1.30    0.70 
   9  -3  -2   -0.10    1.70 
  -9  -3   2    0.80    1.70 
  -9  -3   2    0.40    1.60 
  -9   3   2    0.90    1.20 
   9   3  -2    0.60    1.00 
  -9   3   2    1.60    1.60 
  -9   3   2    1.60    2.10 
   9   3  -2    1.60    2.10 
  -9   3   2   -0.30    1.30 
  -9   3   2   -0.30    1.00 
  -8  -3   2   50.59    4.40 
   8  -3  -2   51.39    4.60 
  -8  -3   2   47.40    3.70 
  -8  -3   2   46.50    4.60 
  -8  -3   2   40.20    4.50 
  -8   3   2   39.20    4.00 
  -8   3   2   46.90    4.10 
  -8   3   2   52.79    4.60 
  -8   3   2   45.50    5.10 
  -8   3   2   43.90    3.80 
   8   3  -2   48.90    4.00 
  -7  -3   2   30.00    2.60 
  -7  -3   2   26.30    3.20 
   7  -3  -2   26.90    3.40 
  -7  -3   2   35.60    3.20 
   7  -3  -2   31.10    2.80 
  -7  -3   2   28.80    3.40 
   7   3  -2   27.10    2.80 
  -7   3   2   31.20    3.30 
   7   3  -2   28.70    3.80 
  -7   3   2   26.90    2.70 
  -7   3   2   24.60    2.70 
  -6  -3   2   48.60    4.00 
   6  -3  -2   37.70    3.60 
  -6  -3   2   44.00    3.30 
  -6  -3   2   48.30    4.20 
  -6  -3   2   44.40    3.30 
   6  -3  -2   46.40    4.20 
  -6  -3   2   47.10    4.00 
   6   3  -2   37.80    4.30 
  -6   3   2   45.80    3.70 
  -6   3   2   51.69    3.70 
  -6   3   2   36.90    3.60 
  -6   3   2   44.70    4.30 
   6   3  -2   37.70    3.70 
  -6   3   2   47.10    4.00 
   5  -3  -2   17.30    1.90 
  -5  -3   2   13.60    2.00 
  -5  -3   2   14.00    1.90 
  -5  -3   2   13.70    1.70 
  -5  -3   2   15.40    1.40 
   5  -3  -2   20.50    2.20 
   5   3  -2   14.30    1.70 
  -5   3   2   17.70    1.80 
  -5   3   2   16.90    1.80 
  -5   3   2   15.60    2.00 
  -5   3   2   14.50    1.80 
  -5   3   2   14.70    1.60 
   4  -3  -2   51.89    4.00 
   4  -3  -2   51.29    4.00 
   4  -3  -2   54.09    4.00 
  -4  -3   2   47.90    4.10 
   4  -3  -2   51.49    4.20 
   4  -3  -2   49.00    4.40 
  -4  -3   2   47.20    4.30 
  -4  -3   2   47.70    3.90 
  -4  -3   2   48.00    4.40 
  -4   3   2   51.69    4.00 
  -4   3   2   47.70    4.10 
   4   3  -2   53.99    4.40 
   4   3  -2   45.20    4.10 
   4   3  -2   57.49    4.20 
   4   3  -2   46.60    4.40 
   3  -3  -2   66.09    5.20 
  -3  -3   2   85.29    5.90 
  -3  -3   2   56.09    5.30 
  -3  -3   2   61.99    5.20 
   3  -3  -2   79.69    5.50 
  -3  -3   2   58.19    5.30 
   3  -3  -2   75.59    5.20 
  -3  -3   2   62.29    5.20 
   3  -3  -2   68.29    5.30 
   3   3  -2   68.39    5.70 
  -3   3   2   70.19    5.40 
  -3   3   2   69.79    5.40 
   3   3  -2   73.49    5.40 
   3   3  -2   68.19    5.40 
  -3   3   2   62.59    5.20 
   3   3  -2   77.59    5.70 
   3   3  -2   61.39    5.30 
   2  -3  -2   56.29    5.00 
   2  -3  -2   62.89    5.00 
  -2  -3   2   59.29    4.80 
   2  -3  -2   62.49    4.80 
   2  -3  -2   63.29    4.80 
  -2  -3   2   58.29    4.90 
   2  -3  -2   70.79    4.90 
  -2  -3   2   66.09    4.80 
  -2  -3   2   57.89    4.70 
  -2  -3   2   61.69    5.20 
  -2   3   2   68.59    4.90 
  -2   3   2   62.89    4.80 
   2   3  -2   63.99    4.70 
  -2   3   2   56.39    4.80 
   2   3  -2   65.59    4.90 
   2   3  -2   60.69    5.10 
   2   3  -2   56.39    4.90 
  -2   3   2   66.89    5.00 
   2   3  -2   63.39    4.80 
  -1  -3   2  273.87   19.30 
  -1  -3   2  249.97   19.50 
  -1  -3   2  278.57   19.30 
   1  -3  -2  259.57   19.20 
   1  -3  -2  228.38   19.40 
  -1  -3   2  269.37   19.20 
   1  -3  -2  256.67   19.50 
   1  -3  -2  273.27   19.40 
   1  -3  -2  270.57   19.30 
  -1  -3   2  255.77   19.40 
   1  -3  -2  286.17   19.30 
   1   3  -2  256.47   19.40 
  -1   3   2  266.47   19.50 
   1   3  -2  244.88   19.20 
  -1   3   2  259.97   19.20 
  -1   3   2  221.08   19.40 
   1   3  -2  237.68   19.20 
  -1   3   2  289.67   19.40 
   1   3  -2  266.37   19.40 
   1   3  -2  289.57   19.30 
   0  -3  -2    4.70    0.90 
   0  -3   2    2.40    0.90 
   0  -3   2    4.10    0.50 
   0  -3   2    4.80    0.90 
   0  -3  -2    3.80    1.10 
   0  -3  -2    3.90    0.80 
   0  -3  -2    5.40    0.60 
   0  -3   2    4.20    0.90 
   0  -3  -2    3.20    0.70 
   0  -3  -2    4.30    1.00 
   0   3   2    7.70    1.20 
   0   3   2    5.00    1.00 
   0   3   2    5.00    0.60 
   0   3  -2    3.00    0.80 
   0   3   2    4.60    0.90 
   0   3  -2    6.30    0.80 
   0   3   2    5.10    0.80 
   0   3  -2    4.50    0.90 
   0   3   2    5.60    0.60 
   0   3  -2    4.40    0.50 
   1  -3   2    1.80    0.70 
   1  -3   2    0.90    0.50 
  -1  -3  -2    1.70    0.70 
   1  -3   2    2.70    0.60 
  -1  -3  -2    1.20    0.90 
  -1  -3  -2    1.80    0.60 
   1  -3   2    2.50    0.90 
   1  -3   2    1.00    0.80 
   1  -3   2    0.60    0.60 
  -1  -3  -2    1.70    0.70 
   1  -3   2    2.60    0.60 
  -1  -3  -2    1.20    0.90 
   1   3   2    0.80    0.50 
   1   3   2    1.20    1.00 
   1   3   2    1.20    0.70 
   1   3   2    1.50    1.00 
  -1   3  -2    1.60    0.60 
   1   3   2    1.80    0.60 
   1   3   2    1.40    0.70 
  -1   3  -2    1.20    0.60 
  -1   3  -2    1.60    0.80 
  -2  -3  -2  119.09    9.40 
   2  -3   2  115.79    9.20 
   2  -3   2  112.49    9.20 
   2  -3   2  118.69    9.10 
  -2  -3  -2  108.69    9.00 
  -2  -3  -2  133.09    9.20 
   2  -3   2  127.49    9.10 
   2  -3   2  124.69    9.10 
  -2  -3  -2  120.09    9.10 
   2   3   2  121.59    9.00 
  -2   3  -2  123.29    9.00 
  -2   3  -2  132.29    9.10 
  -2   3  -2  137.19    9.10 
  -2   3  -2  116.79    9.20 
   2   3   2  105.49    9.10 
   2   3   2  117.19    9.10 
   2   3   2  127.19    9.20 
  -3  -3  -2  169.58   14.40 
  -3  -3  -2  184.48   14.50 
  -3  -3  -2  196.58   14.30 
   3  -3   2  188.48   14.20 
  -3  -3  -2  181.88   14.10 
  -3  -3  -2  212.18   14.10 
   3  -3   2  191.48   14.30 
   3  -3   2  194.38   14.20 
  -3   3  -2  201.78   14.30 
   3   3   2  194.98   14.50 
  -3   3  -2  173.78   14.30 
  -3   3  -2  201.18   14.30 
   3   3   2  187.38   14.30 
  -3   3  -2  192.28   14.40 
   4  -3   2   59.99    4.90 
  -4  -3  -2   61.59    4.90 
  -4  -3  -2   56.09    4.40 
  -4  -3  -2   52.79    5.00 
  -4  -3  -2   62.39    4.40 
  -4  -3  -2   62.99    5.10 
  -4   3  -2   59.99    4.90 
  -4   3  -2   53.59    4.80 
   4   3   2   55.19    4.40 
  -4   3  -2   61.89    5.00 
  -4   3  -2   60.99    4.90 
   4   3   2   63.19    5.00 
  -5  -3  -2   80.99    6.60 
  -5  -3  -2   84.39    6.50 
  -5  -3  -2   74.59    6.40 
  -5   3  -2   72.39    6.30 
  -5   3  -2   79.09    6.40 
  -5   3  -2   79.89    6.50 
  -5   3  -2   78.19    6.40 
  -6  -3  -2  502.75   37.30 
  -6  -3  -2  551.94   37.30 
  -6  -3  -2  542.85   37.40 
   6   3   2  488.85   37.30 
  -6   3  -2  420.96   37.20 
  -6   3  -2  502.55   37.40 
  -6   3  -2  501.35   37.20 
  -6   3  -2  510.55   37.30 
  -7  -3  -2   70.99    5.90 
  -7  -3  -2   74.49    6.30 
  -7   3  -2   64.99    5.70 
  -7   3  -2   55.49    5.80 
  -7   3  -2   67.69    6.10 
  -7   3  -2   70.49    5.90 
   7   3   2   60.39    6.00 
  -8  -3  -2  384.96   29.10 
  -8  -3  -2  383.76   29.10 
  -8  -3  -2  390.26   29.10 
  -8   3  -2  390.06   29.10 
  -8   3  -2  386.96   29.20 
  -9  -3  -2   39.40    4.50 
  -9  -3  -2   36.70    4.30 
   9  -3   2   39.60    4.10 
  -9  -3  -2   36.50    4.30 
  -9   3  -2   39.00    4.50 
   9   3   2   35.70    4.30 
  -9   3  -2   36.30    4.40 
  -9   3  -2   36.20    4.50 
  10  -3   2   29.20    3.50 
 -10  -3  -2   29.30    3.50 
 -10  -3  -2   28.00    3.60 
 -10  -3  -2   29.30    3.40 
 -10   3  -2   23.10    3.50 
 -10   3  -2   27.80    3.60 
  10   3   2   26.10    3.70 
  11  -3   2   42.10    4.50 
 -11  -3  -2   40.00    4.70 
 -11  -3  -2   44.10    4.90 
  11  -3   2   35.10    4.70 
 -11  -3  -2   39.50    4.80 
 -11   3  -2   49.70    5.10 
  11   3   2   46.10    4.90 
 -11   3  -2   38.40    4.50 
  12  -3   2   12.30    3.10 
 -12  -3  -2   18.20    3.00 
 -12  -3  -2   14.70    2.80 
  12  -3   2   17.10    2.60 
 -12  -3  -2   14.50    3.00 
 -12   3  -2   19.20    3.30 
 -12   3  -2   24.70    3.40 
  12   3   2   15.80    3.20 
 -13  -3  -2   21.00    3.30 
 -13  -3  -2   17.10    3.50 
  13  -3   2   25.00    3.00 
  13  -3   2   15.40    3.30 
 -13  -3  -2   26.00    3.50 
 -13   3  -2   21.10    3.60 
  13   3   2   20.10    3.70 
 -13   3  -2   27.30    3.60 
 -14  -3  -2  227.08   18.90 
 -14  -3  -2  275.37   18.80 
  14  -3   2  256.77   18.40 
 -14  -3  -2  225.18   18.60 
  14  -3   2  218.28   18.70 
  14   3   2  265.57   19.10 
 -14   3  -2  210.78   18.90 
 -15  -3  -2   16.20    3.40 
  15  -3   2   20.80    2.90 
 -15  -3  -2   18.20    3.30 
 -15  -3  -2   20.40    3.30 
  15  -3   2   19.10    3.20 
 -15   3  -2   13.10    3.40 
  15   3   2   21.40    3.90 
 -15   3  -2   31.20    3.70 
 -16  -3  -2   63.39    8.20 
  16  -3   2   82.89    8.00 
 -16  -3  -2   92.49    8.00 
 -16  -3  -2   71.89    7.70 
  16  -3   2   90.89    7.50 
 -16   3  -2   71.39    8.40 
 -16   3  -2  108.29    8.20 
  16   3   2   90.29    8.60 
  17  -3   2   46.20    5.80 
  17  -3   2   75.49    5.90 
 -17  -3  -2   49.40    6.20 
 -17  -3  -2   50.79    6.20 
 -17  -3  -2   63.09    6.50 
  17   3   2   67.99    7.30 
 -17   3  -2   55.09    6.40 
 -17   3  -2   76.29    6.50 
 -18  -3  -2    2.40    2.30 
 -18  -3  -2    4.30    3.10 
  18  -3   2    1.80    2.60 
 -18  -3  -2    2.90    2.60 
  18   3   2    2.10    3.20 
 -18   3  -2    0.60    2.90 
 -19  -3  -2   85.29    7.20 
 -19  -3  -2   58.39    6.60 
 -19  -3  -2   65.39    7.80 
  19   3   2   88.69    8.20 
 -19   3  -2   48.30    6.70 
 -19   3  -2   86.99    6.70 
 -19  -4   2   45.40    5.40 
 -19  -4   2   30.80    7.20 
 -19  -4   2   40.50    4.90 
  19  -4  -2   47.90    4.80 
  19   4  -2   42.70    5.60 
 -19   4   2   37.20    5.60 
 -18  -4   2   46.20    5.30 
  18  -4  -2   43.70    4.70 
  18  -4  -2   38.70    4.90 
 -18  -4   2   36.60    4.70 
 -18  -4   2   33.90    5.10 
 -18   4   2   32.50    5.00 
 -18   4   2   44.90    4.20 
  18   4  -2   58.19    6.00 
  17  -4  -2    4.30    2.90 
 -17  -4   2    1.90    2.30 
 -17  -4   2    1.50    2.90 
 -17  -4   2    0.90    2.60 
  17  -4  -2   -0.50    2.40 
  17   4  -2   -2.80    3.20 
 -17   4   2    2.00    1.60 
 -17   4   2   -0.30    2.90 
 -16  -4   2  240.18   16.90 
 -16  -4   2  182.38   16.80 
  16  -4  -2  183.68   17.10 
  16  -4  -2  240.38   16.90 
 -16  -4   2  182.18   17.00 
 -16   4   2  235.78   16.30 
 -16   4   2  184.38   17.10 
  16   4  -2  256.07   17.70 
 -15  -4   2   47.00    5.60 
  15  -4  -2   47.20    5.40 
 -15  -4   2   55.79    5.50 
  15  -4  -2   34.40    5.20 
 -15  -4   2   36.50    5.00 
 -15   4   2   36.80    5.00 
  15   4  -2   40.60    5.40 
 -15   4   2   57.29    4.60 
 -14  -4   2  555.94   38.30 
  14  -4  -2  517.85   38.20 
 -14  -4   2  444.96   38.40 
  14  -4  -2  452.15   38.70 
 -14  -4   2  441.56   38.30 
  14   4  -2  590.54   38.90 
 -14   4   2  571.94   38.00 
 -13  -4   2   54.49    5.60 
 -13  -4   2   41.20    5.10 
  13  -4  -2   50.39    5.50 
 -13  -4   2   49.30    5.40 
  13   4  -2   59.39    6.00 
 -13   4   2   49.90    5.90 
 -12  -4   2   82.19    6.60 
  12  -4  -2   70.69    6.60 
 -12  -4   2   65.59    6.60 
 -12  -4   2   63.29    6.70 
 -12   4   2   70.39    6.90 
 -12   4   2   64.49    6.80 
 -12   4   2   62.49    5.50 
  12   4  -2   67.99    7.30 
 -12   4   2   77.39    6.00 
 -11  -4   2  131.69   10.90 
 -11  -4   2  127.69   10.90 
  11  -4  -2  137.29   10.90 
 -11  -4   2  150.08   10.80 
  11   4  -2  134.09   11.40 
 -11   4   2  146.49   11.30 
  11   4  -2  134.09    9.90 
 -11   4   2  113.79   10.00 
 -11   4   2  125.09   10.90 
 -11   4   2  153.08   10.40 
 -11   4   2  123.39   10.10 
 -10  -4   2  788.72   52.19 
  10  -4  -2  732.43   52.19 
 -10  -4   2  696.33   52.19 
 -10  -4   2  701.63   52.29 
 -10   4   2  704.93   52.39 
 -10   4   2  650.53   51.59 
 -10   4   2  762.12   51.89 
  10   4  -2  590.24   52.39 
  10   4  -2  743.23   51.59 
 -10   4   2  715.03   52.29 
 -10   4   2  652.73   51.79 
  -9  -4   2  263.27   17.90 
  -9  -4   2  228.68   17.90 
  -9  -4   2  238.78   18.00 
  -9  -4   2  235.48   17.20 
   9  -4  -2  230.48   17.90 
  -9   4   2  230.18   18.20 
  -9   4   2  247.98   17.90 
   9   4  -2  190.88   18.10 
  -9   4   2  215.88   17.30 
  -9   4   2  219.78   17.30 
  -9   4   2  238.88   17.50 
   9   4  -2  252.47   17.30 
  -8  -4   2  124.79    9.60 
  -8  -4   2  116.09    9.40 
  -8  -4   2  121.69    9.40 
  -8  -4   2  101.79    8.80 
   8  -4  -2  116.89    9.50 
   8   4  -2  120.29    8.90 
  -8   4   2  112.79    9.00 
  -8   4   2  126.49    8.90 
   8   4  -2  109.49    9.80 
  -8   4   2  115.19    8.90 
  -8   4   2  116.29    9.70 
  -8   4   2  123.89    9.50 
  -7  -4   2  390.16   28.90 
  -7  -4   2  354.06   28.20 
   7  -4  -2  333.97   28.80 
   7  -4  -2  400.96   28.80 
  -7  -4   2  377.06   28.40 
  -7  -4   2  390.46   28.70 
  -7  -4   2  391.26   28.70 
  -7   4   2  348.97   28.40 
   7   4  -2  398.86   29.00 
  -7   4   2  405.66   28.70 
  -7   4   2  378.66   28.30 
  -7   4   2  421.66   28.40 
  -7   4   2  403.96   28.80 
   7   4  -2  392.76   28.40 
  -6  -4   2   36.80    3.70 
   6  -4  -2   34.30    3.60 
  -6  -4   2   28.00    3.30 
   6  -4  -2   31.70    2.80 
  -6  -4   2   26.50    2.50 
  -6  -4   2   30.50    3.20 
  -6  -4   2   23.30    2.60 
  -6   4   2   34.00    3.50 
  -6   4   2   35.80    2.80 
   6   4  -2   29.20    3.40 
  -6   4   2   36.00    3.20 
  -6   4   2   32.10    2.80 
   6   4  -2   34.30    2.90 
  -5  -4   2 1557.34  117.09 
   5  -4  -2 1639.94  116.79 
   5  -4  -2 1578.84  116.79 
   5  -4  -2 1599.24  116.79 
  -5  -4   2 1552.04  117.09 
  -5  -4   2 1551.74  116.69 
  -5  -4   2 1548.05  116.89 
   5   4  -2 1638.84  117.09 
  -5   4   2 1704.53  116.99 
   5   4  -2 1471.85  116.79 
  -5   4   2 1634.94  116.89 
  -5   4   2 1667.33  116.79 
   4  -4  -2  141.39    9.70 
   4  -4  -2  116.89    9.50 
  -4  -4   2  123.29   10.00 
   4  -4  -2  131.79    9.70 
  -4  -4   2  119.39    9.60 
  -4  -4   2  112.59    9.50 
   4  -4  -2  137.69    9.60 
  -4  -4   2  123.69    9.50 
   4   4  -2  131.89    9.80 
   4   4  -2  116.69    9.70 
  -4   4   2  143.89    9.80 
  -4   4   2  133.79    9.60 
  -4   4   2  108.29    9.80 
   4   4  -2  136.49    9.70 
  -4   4   2  131.89    9.60 
   4   4  -2  122.99    9.90 
  -3  -4   2  297.87   22.90 
   3  -4  -2  315.07   22.70 
  -3  -4   2  286.17   22.50 
  -3  -4   2  275.87   22.50 
   3  -4  -2  324.97   22.60 
  -3  -4   2  288.97   22.80 
  -3   4   2  326.27   22.70 
   3   4  -2  325.97   22.70 
  -3   4   2  301.57   22.50 
  -3   4   2  337.17   22.60 
   3   4  -2  274.87   22.60 
   2  -4  -2    3.20    0.90 
  -2  -4   2    1.60    1.40 
  -2  -4   2    2.30    0.60 
   2  -4  -2    1.20    1.00 
  -2  -4   2    2.00    0.90 
  -2  -4   2    2.00    0.70 
  -2  -4   2    1.90    1.10 
   2  -4  -2    2.00    0.50 
  -2   4   2    1.60    1.00 
   2   4  -2    3.00    0.60 
   2   4  -2    2.00    0.90 
   2   4  -2    4.80    0.60 
  -2   4   2    2.80    1.10 
  -2   4   2    1.30    0.90 
   2   4  -2    3.10    1.10 
   2   4  -2    3.70    1.00 
  -2   4   2    3.10    0.60 
   1  -4  -2  595.04   43.00 
  -1  -4   2  549.45   43.30 
   1  -4  -2  571.94   43.30 
  -1  -4   2  612.64   43.10 
  -1  -4   2  602.14   43.00 
  -1  -4   2  522.95   43.00 
  -1  -4   2  584.64   43.20 
   1  -4  -2  616.04   43.00 
   1  -4  -2  599.54   43.30 
  -1  -4   2  626.44   43.40 
  -1   4   2  618.54   43.20 
   1   4  -2  537.65   43.00 
   1   4  -2  540.25   43.20 
  -1   4   2  616.44   43.30 
  -1   4   2  621.74   43.00 
   1   4  -2  552.54   43.20 
   1   4  -2  613.84   43.10 
   0  -4   2  876.11   56.69 
   0  -4  -2  680.83   56.79 
   0  -4   2  742.93   56.79 
   0  -4   2  810.32   56.89 
   0  -4  -2  704.73   56.59 
   0  -4   2  702.93   56.49 
   0  -4  -2  802.42   56.89 
   0  -4   2  707.13   56.49 
   0  -4  -2  705.33   56.89 
   0   4   2  649.14   56.79 
   0   4   2  874.11   56.59 
   0   4  -2  753.42   56.79 
   0   4   2  850.71   56.59 
   0   4   2  835.52   56.69 
   0   4   2  790.22   56.49 
   0   4  -2  851.71   56.69 
   0   4   2  809.12   56.99 
   0   4  -2  739.43   56.89 
   0   4   2  801.72   56.89 
   1  -4   2   53.99    4.10 
  -1  -4  -2   42.00    4.40 
  -1  -4  -2   47.20    4.10 
  -1  -4  -2   40.30    3.90 
   1  -4   2   53.69    4.40 
   1  -4   2   51.29    4.00 
   1  -4   2   49.80    3.80 
   1  -4   2   51.79    3.80 
  -1   4  -2   48.80    4.00 
  -1   4  -2   50.99    4.40 
  -1   4  -2   51.89    4.00 
   1   4   2   57.59    4.40 
   1   4   2   52.29    3.90 
   1   4   2   47.80    3.80 
   1   4   2   51.29    3.90 
   1   4   2   49.10    4.10 
   1   4   2   43.90    4.10 
   2  -4   2 1885.41  129.49 
  -2  -4  -2 1701.83  129.39 
   2  -4   2 1866.11  129.39 
   2  -4   2 1854.81  129.59 
  -2  -4  -2 1584.54  129.29 
  -2  -4  -2 1705.53  129.69 
   2  -4   2 1715.73  129.29 
  -2  -4  -2 1834.42  129.29 
  -2  -4  -2 1601.54  129.59 
   2   4   2 1774.22  129.79 
  -2   4  -2 1910.81  129.29 
  -2   4  -2 1944.41  129.39 
   2   4   2 1687.33  129.39 
  -2   4  -2 1767.62  129.29 
   2   4   2 1858.81  129.39 
   2   4   2 1595.44  129.39 
  -3  -4  -2  786.22   56.09 
  -3  -4  -2  793.92   56.39 
   3  -4   2  734.63   55.99 
  -3  -4  -2  649.64   55.89 
   3  -4   2  838.72   55.99 
  -3  -4  -2  671.63   56.29 
  -3  -4  -2  796.02   56.09 
  -3   4  -2  811.42   56.09 
  -3   4  -2  795.82   56.09 
   3   4   2  723.83   55.99 
  -3   4  -2  793.62   55.89 
   3   4   2  806.42   56.09 
  -3   4  -2  762.12   56.29 
   3   4   2  726.43   55.99 
  -4  -4  -2 6428.66  446.66 
  -4  -4  -2 5913.61  446.16 
  -4  -4  -2 6167.48  446.06 
  -4  -4  -2 6251.77  446.36 
   4  -4   2 5851.11  446.26 
  -4   4  -2 6595.84  446.36 
   4   4   2 6050.09  446.16 
  -4   4  -2 5598.84  446.36 
  -5  -4  -2 1452.05  108.09 
  -5  -4  -2 1335.87  107.59 
  -5  -4  -2 1550.34  108.19 
  -5  -4  -2 1588.84  107.99 
  -5  -4  -2 1377.16  107.59 
  -5   4  -2 1586.44  107.99 
  -5   4  -2 1573.44  108.09 
   5   4   2 1352.16  107.59 
  -5   4  -2 1497.75  107.89 
   5   4   2 1595.84  108.09 
  -5   4  -2 1298.47  107.89 
  -6  -4  -2  960.10   74.39 
  -6  -4  -2 1043.40   74.19 
  -6  -4  -2 1068.59   73.99 
   6   4   2 1002.90   74.09 
  -6   4  -2 1044.80   73.99 
  -6   4  -2  887.11   73.89 
  -6   4  -2 1043.90   73.99 
  -6   4  -2  994.90   73.99 
  -7  -4  -2  193.88   14.80 
  -7  -4  -2  196.08   14.60 
  -7  -4  -2  190.78   14.60 
  -7   4  -2  189.58   14.70 
   7   4   2  187.58   14.70 
  -7   4  -2  154.18   14.40 
  -7   4  -2  193.18   14.50 
  -7   4  -2  208.98   14.60 
  -8  -4  -2  493.75   34.80 
  -8  -4  -2  485.15   34.70 
  -8  -4  -2  500.85   34.70 
  -8   4  -2  396.16   34.50 
  -8   4  -2  491.45   34.70 
   8   4   2  445.86   34.80 
  -8   4  -2  437.96   34.80 
  -9  -4  -2  108.69    8.90 
  -9  -4  -2  109.39    8.80 
  -9  -4  -2  114.69    8.80 
  -9   4  -2   98.19    8.90 
  -9   4  -2  100.89    8.70 
   9   4   2   85.39    9.00 
 -10  -4  -2   68.09    6.40 
 -10  -4  -2   73.19    6.40 
 -10  -4  -2   64.49    6.30 
  10  -4   2   58.79    6.10 
  10   4   2   62.79    6.80 
 -10   4  -2   66.79    6.40 
 -10   4  -2   60.69    6.20 
 -10   4  -2   72.99    6.50 
  11  -4   2  115.39    9.30 
 -11  -4  -2  119.19    9.50 
 -11  -4  -2  104.29    9.60 
 -11  -4  -2  112.39    9.60 
 -11   4  -2  118.39    9.50 
  11   4   2  101.69    9.90 
 -11   4  -2  106.69    9.50 
 -11   4  -2  112.49    9.60 
 -12  -4  -2    1.80    2.20 
 -12  -4  -2    1.60    2.10 
  12  -4   2   -0.10    1.90 
 -12  -4  -2    0.70    2.20 
  12   4   2    2.20    2.90 
 -12   4  -2   -0.20    2.30 
 -12   4  -2    2.60    2.10 
  13  -4   2  560.54   41.10 
  13  -4   2  487.85   41.50 
 -13  -4  -2  617.94   41.50 
 -13  -4  -2  502.25   41.40 
 -13   4  -2  638.04   41.40 
 -13   4  -2  501.45   41.40 
 -14  -4  -2   33.30    4.30 
  14  -4   2   30.00    4.40 
 -14  -4  -2   31.40    4.50 
 -14  -4  -2   46.20    5.30 
  14  -4   2   41.60    4.70 
 -14   4  -2   37.70    4.60 
 -14   4  -2   52.39    5.20 
  14   4   2   37.70    4.90 
  15  -4   2  114.99   10.20 
 -15  -4  -2  117.39   10.50 
 -15  -4  -2  107.49   10.30 
  15  -4   2  120.59    9.70 
 -15  -4  -2  105.09   10.10 
  15   4   2  141.89   10.90 
 -15   4  -2  111.89   10.40 
 -16  -4  -2    7.30    2.80 
 -16  -4  -2    4.30    2.90 
  16  -4   2   11.90    2.50 
 -16  -4  -2    4.30    2.60 
  16  -4   2    8.70    2.80 
  16   4   2   12.50    3.60 
 -16   4  -2   10.40    2.70 
 -16   4  -2    6.20    3.00 
 -17  -4  -2   25.10    4.30 
 -17  -4  -2   32.40    4.20 
  17  -4   2   26.80    4.10 
 -17  -4  -2   28.00    4.10 
  17  -4   2   37.50    3.90 
 -17   4  -2   26.50    4.50 
 -17   4  -2   38.40    4.00 
  17   4   2   41.00    5.10 
  18  -4   2   66.79    7.30 
 -18  -4  -2   88.39    7.40 
 -18  -4  -2   56.09    6.90 
  18  -4   2   80.89    6.70 
 -18  -4  -2   56.99    6.90 
 -18   4  -2   68.79    7.80 
  18   4   2   85.59    8.30 
 -19  -4  -2   59.69    6.20 
  19  -4   2   54.39    6.20 
 -19  -4  -2   46.60    5.70 
 -19  -4  -2   42.40    5.60 
  19   4   2   59.69    6.10 
 -19   4  -2   41.50    5.60 
 -19   4  -2   56.29    5.40 
 -19  -5   2    1.40    2.90 
 -19  -5   2   -2.40    2.90 
  19  -5  -2    2.00    2.60 
 -19  -5   2   -1.50    2.30 
  19  -5  -2   -1.00    2.80 
  19   5  -2    3.30    3.70 
 -18  -5   2   35.90    4.30 
 -18  -5   2   35.40    4.60 
  18  -5  -2   24.00    4.30 
 -18  -5   2   31.60    4.70 
  18  -5  -2   42.20    4.50 
  18   5  -2   41.60    5.60 
 -18   5   2   29.30    4.60 
  17  -5  -2    6.40    2.80 
 -17  -5   2    6.10    3.20 
  17  -5  -2    6.60    3.20 
 -17  -5   2    5.10    3.00 
 -17  -5   2   10.70    2.80 
 -17   5   2    3.10    3.00 
  17   5  -2   10.00    4.00 
  16  -5  -2  102.29   10.80 
 -16  -5   2  138.29   10.40 
  16  -5  -2  132.29   10.30 
 -16  -5   2  102.99   10.40 
 -16  -5   2   98.79   10.30 
 -16   5   2  113.59   10.50 
  16   5  -2  138.49   11.50 
  15  -5  -2   59.19    6.10 
 -15  -5   2   51.99    6.30 
  15  -5  -2   39.90    6.00 
 -15  -5   2   52.69    6.20 
 -15  -5   2   66.39    6.10 
 -15   5   2   47.80    5.70 
 -15   5   2   56.59    4.90 
  15   5  -2   43.20    6.00 
 -14  -5   2    9.00    2.70 
  14  -5  -2   16.10    3.10 
 -14  -5   2   10.40    3.00 
 -14  -5   2    9.80    2.70 
  14   5  -2   12.90    3.80 
 -14   5   2   10.80    1.90 
 -14   5   2    4.60    3.50 
  13  -5  -2  458.55   34.90 
 -13  -5   2  437.06   35.00 
 -13  -5   2  486.15   34.90 
 -13  -5   2  441.86   35.00 
 -13   5   2  439.36   35.00 
 -13   5   2  490.95   35.10 
 -13   5   2  483.95   35.20 
  13   5  -2  481.35   36.00 
 -12  -5   2   15.60    3.10 
 -12  -5   2   15.30    3.00 
 -12  -5   2   18.00    2.90 
  12  -5  -2   16.90    3.10 
 -12   5   2   14.60    3.00 
  12   5  -2   19.90    3.60 
 -12   5   2   20.90    2.30 
 -12   5   2   20.00    3.30 
 -11  -5   2   72.79    6.50 
 -11  -5   2   67.29    6.60 
  11  -5  -2   66.79    6.60 
 -11  -5   2   69.89    6.70 
 -11   5   2   74.19    5.80 
 -11   5   2   67.29    6.60 
 -11   5   2   63.19    7.10 
  11   5  -2   60.89    7.30 
 -10  -5   2  203.98   16.10 
 -10  -5   2  216.28   16.10 
 -10  -5   2  204.48   16.30 
 -10  -5   2  209.88   15.40 
  10  -5  -2  216.28   16.30 
  10   5  -2  208.68   15.40 
 -10   5   2  208.88   15.60 
 -10   5   2  210.38   16.50 
  10   5  -2  173.58   16.50 
 -10   5   2  213.78   16.20 
  -9  -5   2    2.00    1.70 
  -9  -5   2    0.90    1.60 
   9  -5  -2    0.50    1.90 
  -9  -5   2    1.30    2.00 
  -9  -5   2    0.60    0.70 
  -9   5   2    3.30    0.90 
   9   5  -2    1.80    0.90 
  -9   5   2    2.50    2.30 
   9   5  -2   -1.70    2.20 
  -9   5   2    1.80    1.00 
  -9   5   2    1.30    1.70 
   8  -5  -2   57.59    5.30 
   8  -5  -2   59.59    5.90 
  -8  -5   2   60.59    5.70 
  -8  -5   2   56.79    5.00 
  -8  -5   2   62.09    6.00 
  -8  -5   2   64.59    5.70 
   8   5  -2   64.19    5.00 
  -8   5   2   61.39    5.60 
  -8   5   2   65.79    5.00 
  -8   5   2   63.49    6.00 
  -8   5   2   67.79    5.00 
   8   5  -2   59.59    6.20 
  -7  -5   2  133.59   11.40 
   7  -5  -2  150.48   12.10 
  -7  -5   2  157.78   12.20 
  -7  -5   2  143.19   11.90 
  -7  -5   2  133.89   11.30 
   7  -5  -2  157.98   11.70 
  -7  -5   2  156.98   11.90 
  -7   5   2  165.48   11.90 
  -7   5   2  156.98   11.50 
   7   5  -2  160.88   12.30 
   7   5  -2  153.68   11.50 
  -7   5   2  160.38   11.50 
  -7   5   2  165.98   12.10 
  -6  -5   2    2.10    1.30 
   6  -5  -2    1.40    1.20 
  -6  -5   2    0.70    0.70 
  -6  -5   2    2.60    1.70 
  -6  -5   2    2.10    0.70 
  -6   5   2    0.60    0.90 
  -6   5   2    2.20    1.50 
  -6   5   2    1.00    0.90 
   6   5  -2    1.60    1.60 
  -6   5   2    2.40    1.30 
   6   5  -2    2.20    1.00 
  -5  -5   2  111.79    8.20 
   5  -5  -2   92.39    7.20 
  -5  -5   2   81.99    7.40 
   5  -5  -2   87.49    6.90 
  -5  -5   2   89.09    6.80 
  -5  -5   2   84.59    7.10 
   5   5  -2   88.69    7.40 
  -5   5   2   97.69    7.10 
  -5   5   2   91.79    7.30 
  -5   5   2   76.79    7.40 
  -5   5   2   96.79    7.10 
   5   5  -2   84.19    7.00 
  -4  -5   2  240.68   19.20 
  -4  -5   2  247.18   19.30 
  -4  -5   2  248.48   19.70 
   4  -5  -2  261.17   19.50 
   4  -5  -2  270.77   19.30 
  -4   5   2  291.07   19.50 
  -4   5   2  264.27   19.40 
   4   5  -2  270.27   19.50 
  -4   5   2  276.97   19.30 
   4   5  -2  240.18   19.60 
   4   5  -2  245.28   19.40 
  -3  -5   2    0.70    0.70 
  -3  -5   2    1.50    0.80 
  -3  -5   2    0.70    1.40 
   3  -5  -2    1.00    0.90 
   3  -5  -2    0.60    1.10 
  -3  -5   2    0.70    1.30 
  -3   5   2    1.00    1.10 
  -3   5   2   -0.90    1.00 
   3   5  -2   -0.30    1.00 
  -3   5   2    1.40    0.70 
   3   5  -2    2.20    0.80 
  -3   5   2    1.50    1.10 
   3   5  -2    1.90    1.10 
   2  -5  -2   34.50    3.10 
  -2  -5   2   37.70    3.10 
   2  -5  -2   40.20    3.80 
  -2  -5   2   45.80    4.10 
  -2  -5   2   42.00    3.30 
   2  -5  -2   39.80    3.60 
   2   5  -2   35.30    3.60 
  -2   5   2   35.80    3.70 
   2   5  -2   41.30    3.10 
   2   5  -2   40.00    3.50 
   2   5  -2   39.60    3.70 
  -2   5   2   40.80    3.70 
   2   5  -2   38.40    3.00 
  -2   5   2   43.90    3.10 
  -1  -5   2  144.59   10.40 
   1  -5  -2  136.89   10.90 
   1  -5  -2  148.59   10.40 
  -1  -5   2  146.49   11.00 
  -1  -5   2  137.19   10.80 
   1  -5  -2  150.48   10.80 
   1   5  -2  153.28   10.60 
  -1   5   2  121.89   10.70 
   1   5  -2  130.89   10.70 
   1   5  -2  124.59   10.80 
  -1   5   2  143.59   10.60 
   0  -5   2    2.10    1.30 
   0  -5   2    1.90    0.50 
   0  -5  -2    0.60    0.70 
   0  -5  -2    3.10    1.30 
   0  -5   2    5.70    1.20 
   0  -5  -2    3.00    1.40 
   0   5   2    3.40    0.90 
   0   5  -2    3.50    1.40 
   0   5   2    1.80    1.00 
   0   5   2    4.20    0.60 
   0   5   2    4.50    1.30 
   0   5  -2    3.80    1.20 
   0   5  -2    3.20    1.00 
   1  -5   2    6.60    0.80 
   1  -5   2    6.00    1.50 
  -1  -5  -2    6.20    1.60 
  -1  -5  -2    6.00    1.00 
  -1  -5  -2    7.00    1.60 
   1  -5   2   10.00    1.40 
   1   5   2    6.10    0.70 
   1   5   2   10.10    1.60 
  -1   5  -2    8.50    1.60 
   1   5   2    5.20    1.20 
   1   5   2    4.40    1.10 
   1   5   2    6.80    0.80 
   1   5   2    7.50    0.80 
  -1   5  -2    3.70    1.00 
  -1   5  -2    7.00    1.20 
   2  -5   2  347.47   24.60 
  -2  -5  -2  332.57   24.90 
   2  -5   2  295.07   24.30 
   2  -5   2  338.57   24.80 
  -2  -5  -2  346.17   24.40 
  -2  -5  -2  324.37   24.60 
   2   5   2  311.37   24.50 
  -2   5  -2  318.77   24.80 
  -2   5  -2  331.47   24.50 
   2   5   2  323.77   24.50 
   2   5   2  343.87   24.60 
  -2   5  -2  362.96   24.50 
  -3  -5  -2  862.61   59.89 
  -3  -5  -2  759.02   60.19 
   3  -5   2  825.12   60.19 
   3  -5   2  873.51   59.89 
   3  -5   2  747.43   59.79 
  -3  -5  -2  821.22   60.29 
  -3  -5  -2  788.62   59.79 
  -3  -5  -2  821.52   59.89 
  -3   5  -2  864.11   59.99 
   3   5   2  845.72   59.99 
  -3   5  -2  902.81   59.89 
   3   5   2  757.32   60.19 
   3   5   2  781.52   59.89 
   3   5   2  771.52   59.89 
  -3   5  -2  827.62   59.89 
  -3   5  -2  808.22   60.19 
  -4  -5  -2  106.29    7.60 
  -4  -5  -2   98.19    8.10 
  -4  -5  -2   83.79    7.50 
   4  -5   2   85.79    7.60 
  -4  -5  -2  103.59    8.30 
  -4  -5  -2  107.09    7.80 
   4  -5   2   98.39    8.00 
  -4   5  -2  103.39    8.20 
  -4   5  -2  107.69    7.50 
   4   5   2  101.29    8.00 
  -4   5  -2  106.19    7.80 
   4   5   2   98.19    7.60 
  -4   5  -2  101.99    7.80 
  -5  -5  -2  183.18   15.00 
  -5  -5  -2  210.98   15.80 
  -5  -5  -2  213.58   15.40 
  -5  -5  -2  176.28   15.80 
   5   5   2  207.88   15.50 
   5   5   2  203.98   15.10 
  -5   5  -2  211.48   15.60 
  -5   5  -2  199.58   15.30 
  -5   5  -2  217.28   15.30 
  -6  -5  -2  157.18   11.50 
  -6  -5  -2  160.78   11.20 
  -6  -5  -2  119.69   10.50 
  -6  -5  -2  129.99   10.60 
  -6  -5  -2  145.19   11.30 
  -6   5  -2  127.59   11.00 
  -6   5  -2  154.08   11.50 
   6   5   2  147.49   10.60 
  -6   5  -2  163.38   11.10 
  -7  -5  -2  324.77   24.70 
  -7  -5  -2  341.17   24.80 
  -7  -5  -2  338.97   24.60 
  -7   5  -2  336.27   24.50 
  -7   5  -2  307.17   24.60 
   7   5   2  329.47   24.70 
  -7   5  -2  308.47   24.60 
  -8  -5  -2   22.60    3.00 
  -8  -5  -2   22.50    3.20 
  -8  -5  -2   19.20    2.80 
  -8   5  -2   25.70    2.90 
   8   5   2   20.10    3.30 
  -8   5  -2   21.60    3.00 
  -8   5  -2   19.70    2.60 
  -8   5  -2   19.40    2.90 
  -9  -5  -2  143.69   11.30 
  -9  -5  -2  147.79   11.20 
  -9  -5  -2  139.49   11.20 
  -9   5  -2  128.99   10.90 
   9   5   2  131.99   11.50 
  -9   5  -2  142.99   11.10 
  -9   5  -2  123.79   11.20 
 -10  -5  -2    3.60    2.20 
 -10  -5  -2    2.70    2.30 
 -10  -5  -2    4.00    2.10 
  10  -5   2    6.00    2.20 
 -10   5  -2    4.00    1.90 
  10   5   2    2.60    2.60 
 -10   5  -2    4.40    2.20 
 -10   5  -2    2.10    2.00 
 -11  -5  -2    1.00    2.20 
  11  -5   2    2.70    2.20 
 -11  -5  -2   -1.50    2.00 
 -11  -5  -2    4.10    2.30 
  11   5   2    0.80    2.50 
 -11   5  -2    3.70    2.20 
 -11   5  -2    2.90    2.00 
 -11   5  -2    0.30    2.20 
  12  -5   2    4.80    2.30 
 -12  -5  -2    6.20    2.40 
 -12  -5  -2    2.40    2.50 
 -12  -5  -2    4.60    2.40 
 -12   5  -2    4.40    2.30 
 -12   5  -2    6.00    2.50 
 -12   5  -2    3.80    2.20 
  12   5   2    6.60    2.80 
  13  -5   2   21.90    3.30 
 -13  -5  -2   31.00    5.70 
 -13  -5  -2   19.40    3.70 
 -13  -5  -2   20.90    3.50 
 -13   5  -2   27.80    3.50 
  13   5   2   28.70    4.20 
 -13   5  -2   19.90    3.60 
  14  -5   2  117.19   11.40 
  14  -5   2  141.59   10.80 
 -14  -5  -2  119.99   11.10 
 -14  -5  -2  114.09   11.00 
 -14  -5  -2  146.19   13.30 
 -14   5  -2  119.49   11.20 
  14   5   2  139.69   11.70 
 -14   5  -2  142.39   10.80 
 -15  -5  -2   28.60    4.20 
  15  -5   2   26.10    4.30 
 -15  -5  -2   26.80    4.20 
  15  -5   2   34.10    3.90 
 -15  -5  -2   31.80    4.30 
  15   5   2   39.00    5.00 
 -15   5  -2   36.60    4.00 
 -15   5  -2   29.50    4.40 
 -16  -5  -2   16.20    3.30 
 -16  -5  -2   15.90    3.50 
  16  -5   2   15.00    3.40 
 -16  -5  -2   15.20    3.50 
  16  -5   2   23.00    3.20 
 -16   5  -2   14.10    3.40 
 -16   5  -2   19.80    3.10 
  16   5   2   19.10    4.10 
 -17  -5  -2   14.10    3.20 
 -17  -5  -2   14.40    3.20 
 -17  -5  -2    7.70    3.20 
  17  -5   2   16.30    2.90 
  17  -5   2   13.50    3.20 
  17   5   2   15.90    4.00 
 -17   5  -2   13.90    3.50 
 -17   5  -2   16.30    2.70 
 -18  -5  -2   38.50    4.60 
 -18  -5  -2   41.90    6.50 
 -18  -5  -2   29.80    4.70 
  18  -5   2   46.60    5.00 
  18  -5   2   36.50    4.60 
  18   5   2   39.20    5.50 
 -18   5  -2   29.50    4.80 
 -18  -6   2   33.30    4.90 
 -18  -6   2   47.90    4.90 
 -18  -6   2   35.20    5.00 
  18  -6  -2   32.10    5.00 
  18  -6  -2   49.80    5.10 
 -18   6   2   39.40    5.10 
  18   6  -2   52.09    7.10 
 -17  -6   2   80.89    8.30 
  17  -6  -2   97.19    8.30 
  17  -6  -2   76.39    7.10 
 -17  -6   2   73.89    8.20 
  17  -6  -2   83.89    8.80 
 -17  -6   2  103.59    8.30 
  17   6  -2   90.79    9.40 
 -17   6   2   66.09    8.10 
 -16  -6   2   92.29    9.30 
  16  -6  -2   96.99   10.00 
 -16  -6   2   90.59    9.30 
  16  -6  -2  110.79    9.10 
  16  -6  -2   92.39    8.20 
 -16  -6   2  106.29    9.10 
  16   6  -2  113.29   10.30 
 -16   6   2   91.89    9.20 
 -15  -6   2  253.07   18.50 
  15  -6  -2  257.07   18.50 
 -15  -6   2  222.98   18.60 
  15  -6  -2  217.68   17.90 
 -15  -6   2  215.58   18.40 
 -15   6   2  231.48   18.50 
  15   6  -2  245.98   19.20 
 -14  -6   2  215.08   15.40 
 -14  -6   2  177.98   15.30 
 -14  -6   2  186.68   15.50 
  14  -6  -2  201.18   15.40 
  14  -6  -2  182.58   14.80 
 -14   6   2  168.18   15.40 
  14   6  -2  191.68   16.00 
 -14   6   2  208.88   15.60 
  13  -6  -2  194.28   15.70 
 -13  -6   2  191.58   16.30 
 -13  -6   2  210.28   16.20 
  13  -6  -2  214.88   16.30 
 -13  -6   2  219.08   16.20 
  13   6  -2  191.48   16.70 
 -13   6   2  205.08   16.40 
 -13   6   2  207.68   16.30 
 -12  -6   2   49.80    5.20 
 -12  -6   2   45.70    5.30 
  12  -6  -2   46.40    5.50 
 -12  -6   2   44.20    5.40 
 -12   6   2   45.00    4.90 
 -12   6   2   46.80    5.20 
  12   6  -2   30.20    5.00 
  11  -6  -2   24.20    3.60 
 -11  -6   2   23.00    3.30 
  11  -6  -2   29.20    3.50 
 -11  -6   2   23.00    3.40 
 -11  -6   2   27.20    3.90 
  11   6  -2   28.20    2.40 
  11   6  -2   17.00    3.80 
 -11   6   2   35.70    3.80 
 -11   6   2   25.90    3.80 
  10  -6  -2  317.57   24.70 
  10  -6  -2  312.07   25.10 
 -10  -6   2  328.57   25.00 
 -10  -6   2  346.77   25.10 
 -10  -6   2  339.57   25.30 
 -10   6   2  348.67   25.10 
 -10   6   2  343.07   25.30 
  10   6  -2  326.37   24.40 
  10   6  -2  312.87   25.40 
   9  -6  -2  322.57   24.80 
   9  -6  -2  319.07   25.10 
  -9  -6   2  334.67   25.30 
  -9  -6   2  333.77   25.00 
  -9  -6   2  310.17   25.00 
  -9  -6   2  316.67   24.50 
  -9   6   2  358.76   25.00 
  -9   6   2  358.86   24.40 
   9   6  -2  332.77   25.40 
  -9   6   2  338.27   24.50 
  -9   6   2  329.27   25.20 
   9   6  -2  316.37   24.50 
  -8  -6   2    5.00    1.80 
  -8  -6   2    7.70    1.00 
  -8  -6   2    5.60    2.00 
   8  -6  -2    9.60    2.50 
   8  -6  -2   11.00    1.90 
  -8  -6   2    5.90    2.30 
  -8   6   2    5.20    2.10 
  -8   6   2    9.00    1.40 
  -8   6   2   11.30    2.10 
  -8   6   2    5.10    1.30 
   8   6  -2    9.20    2.60 
   8   6  -2    8.70    1.40 
   7  -6  -2  366.76   28.20 
   7  -6  -2  380.66   27.90 
  -7  -6   2  367.66   28.30 
  -7  -6   2  369.36   27.90 
  -7  -6   2  365.46   28.10 
  -7  -6   2  341.27   27.50 
   7   6  -2  380.86   28.20 
  -7   6   2  363.76   27.60 
  -7   6   2  394.36   27.70 
  -7   6   2  406.86   27.90 
  -7   6   2  379.16   28.10 
   7   6  -2  372.26   27.70 
  -6  -6   2   18.60    2.00 
   6  -6  -2   20.60    2.40 
  -6  -6   2   13.00    2.70 
  -6  -6   2   22.70    2.40 
  -6  -6   2   17.90    2.70 
   6   6  -2   20.00    2.40 
  -6   6   2   20.70    2.60 
  -6   6   2   16.90    2.30 
   6   6  -2   18.40    2.70 
  -6   6   2   22.30    2.50 
  -5  -6   2  847.82   63.19 
  -5  -6   2  817.42   63.19 
  -5  -6   2  870.31   62.69 
   5  -6  -2  871.11   62.99 
   5  -6  -2  918.31   62.79 
  -5  -6   2  815.42   62.79 
   5   6  -2  869.01   62.99 
  -5   6   2  923.11   62.79 
  -5   6   2  746.63   62.99 
  -5   6   2  883.51   62.89 
   5   6  -2  828.12   62.79 
  -5   6   2  857.71   62.79 
   4  -6  -2   64.79    5.70 
   4  -6  -2   78.69    6.30 
  -4  -6   2   72.29    5.80 
  -4  -6   2   69.79    5.80 
  -4  -6   2   68.39    6.50 
   4  -6  -2   75.79    6.00 
  -4  -6   2   70.39    6.90 
   4   6  -2   72.39    6.10 
  -4   6   2   77.09    6.10 
  -4   6   2   71.09    7.10 
   4   6  -2   87.89    6.80 
   4   6  -2   87.99    6.00 
  -4   6   2   58.99    6.20 
  -4   6   2   78.59    5.80 
   4   6  -2   67.19    6.50 
   3  -6  -2   48.40    4.20 
   3  -6  -2   41.60    3.90 
  -3  -6   2   56.99    4.90 
   3  -6  -2   49.70    4.70 
  -3  -6   2   49.60    4.00 
  -3  -6   2   57.29    4.10 
   3   6  -2   42.80    4.40 
   3   6  -2   51.29    4.40 
  -3   6   2   55.99    4.00 
  -3   6   2   42.20    4.60 
   3   6  -2   52.69    4.00 
  -3   6   2   47.50    4.40 
  -3   6   2   49.20    4.40 
  -2  -6   2    1.60    1.30 
  -2  -6   2    3.70    0.90 
  -2  -6   2    2.60    0.70 
   2  -6  -2    2.80    0.50 
  -2  -6   2    3.70    1.60 
   2  -6  -2    2.20    0.60 
   2  -6  -2    2.90    1.50 
   2  -6  -2    5.10    1.30 
  -2   6   2    1.40    1.20 
  -2   6   2    2.70    1.40 
   2   6  -2    1.70    1.30 
   2   6  -2    1.30    1.10 
   2   6  -2    3.10    0.60 
   2   6  -2    2.80    0.40 
  -2   6   2    3.30    1.20 
   2   6  -2    2.30    1.10 
  -1  -6   2  212.18   14.90 
   1  -6  -2  208.88   15.30 
   1  -6  -2  200.78   15.50 
  -1  -6   2  202.68   15.40 
   1  -6  -2  203.68   14.90 
   1   6  -2  186.88   15.30 
  -1   6   2  182.18   15.30 
  -1   6   2  203.48   15.10 
   1   6  -2  215.08   15.10 
   1   6  -2  191.18   15.30 
   0  -6  -2  178.08   14.10 
   0  -6  -2  185.18   13.60 
   0  -6   2  178.68   13.90 
   0  -6   2  195.48   14.20 
   0  -6  -2  182.88   14.00 
   0  -6   2  181.98   13.50 
   0   6  -2  193.08   13.70 
   0   6  -2  164.58   14.00 
   0   6   2  201.08   13.80 
   0   6  -2  166.98   14.00 
   0   6   2  188.58   14.00 
   0   6   2  169.28   13.90 
  -1  -6  -2   11.40    1.50 
  -1  -6  -2   21.40    2.50 
  -1  -6  -2   14.30    2.30 
   1  -6   2   18.50    2.00 
  -1   6  -2   12.90    1.60 
  -1   6  -2   16.40    1.80 
   1   6   2   16.40    1.40 
   1   6   2   16.20    1.40 
  -1   6  -2   10.90    2.00 
   1   6   2   10.20    1.80 
   1   6   2   12.90    1.90 
   1   6   2   12.80    1.80 
   2  -6   2  198.18   13.80 
   2  -6   2  186.68   14.00 
   2  -6   2  188.48   13.40 
  -2  -6  -2  185.58   14.10 
   2  -6   2  162.08   13.40 
  -2  -6  -2  169.28   14.10 
   2   6   2  184.28   13.80 
   2   6   2  176.98   13.40 
  -2   6  -2  198.78   13.70 
  -2   6  -2  174.98   13.70 
   2   6   2  179.28   14.30 
  -2   6  -2  174.58   14.00 
   2   6   2  183.58   13.50 
  -3  -6  -2  412.36   30.90 
   3  -6   2  421.16   30.50 
   3  -6   2  411.96   30.80 
  -3  -6  -2  432.06   30.40 
   3  -6   2  356.66   30.30 
  -3   6  -2  397.96   30.40 
   3   6   2  410.86   30.90 
   3   6   2  428.76   31.50 
  -3   6  -2  431.86   30.50 
  -3   6  -2  455.05   30.40 
   3   6   2  402.36   30.50 
   3   6   2  392.36   30.40 
  -4  -6  -2  888.31   63.09 
   4  -6   2  821.92   63.29 
  -4  -6  -2  886.11   63.59 
  -4  -6  -2  811.12   63.49 
   4  -6   2  728.13   62.89 
  -4  -6  -2  911.61   63.39 
   4   6   2  850.51   63.09 
  -4   6  -2  870.61   63.49 
  -4   6  -2  932.11   63.09 
  -4   6  -2  884.41   63.09 
  -4   6  -2  847.72   62.99 
   4   6   2  881.71   63.19 
  -5  -6  -2  643.74   45.30 
  -5  -6  -2  581.74   44.60 
   5  -6   2  573.04   45.00 
  -5  -6  -2  591.14   45.10 
  -5  -6  -2  517.85   44.70 
  -5  -6  -2  642.84   44.90 
  -5   6  -2  628.74   45.20 
  -5   6  -2  597.04   44.60 
  -5   6  -2  641.94   44.80 
   5   6   2  626.74   44.70 
   5   6   2  622.04   45.00 
  -5   6  -2  631.64   45.60 
   6  -6   2   68.89    5.90 
  -6  -6  -2   53.79    5.00 
  -6  -6  -2   59.59    5.90 
  -6  -6  -2   70.09    6.30 
  -6  -6  -2   75.59    5.80 
  -6  -6  -2   62.39    5.10 
  -6   6  -2   69.99    6.10 
  -6   6  -2   65.79    5.80 
   6   6   2   64.69    5.20 
   6   6   2   71.09    6.10 
  -6   6  -2   72.59    5.60 
  -7  -6  -2  251.37   21.60 
  -7  -6  -2  316.47   22.60 
  -7  -6  -2  315.77   22.20 
  -7  -6  -2  279.47   22.30 
   7   6   2  301.97   22.40 
   7   6   2  292.87   21.70 
  -7   6  -2  287.37   22.20 
  -7   6  -2  299.27   22.30 
  -7   6  -2  309.77   22.10 
  -8  -6  -2  174.08   13.20 
  -8  -6  -2  175.38   13.60 
  -8  -6  -2  163.78   13.40 
  -8   6  -2  171.48   13.40 
  -8   6  -2  154.68   13.30 
  -8   6  -2  191.28   13.20 
  -8   6  -2  148.09   13.00 
   8   6   2  173.88   13.60 
  -9  -6  -2   25.50    3.10 
  -9  -6  -2   18.30    2.90 
  -9  -6  -2   21.00    3.30 
  -9   6  -2   28.40    3.10 
   9   6   2   19.10    3.40 
  -9   6  -2   15.10    3.10 
  -9   6  -2   24.20    2.80 
  -9   6  -2   23.10    3.30 
 -10  -6  -2   16.90    2.90 
 -10  -6  -2   18.00    3.10 
 -10  -6  -2   14.60    2.60 
 -10   6  -2   12.50    2.90 
  10   6   2   17.90    3.40 
 -10   6  -2   15.70    2.40 
 -10   6  -2   18.50    2.90 
  11  -6   2  130.69   11.30 
 -11  -6  -2  138.49   11.60 
 -11  -6  -2  140.49   11.40 
 -11  -6  -2  141.59   11.30 
 -11   6  -2  122.59   11.40 
 -11   6  -2  146.09   11.00 
 -11   6  -2  142.99   11.30 
  11   6   2  125.89   11.80 
  12  -6   2    3.30    2.40 
 -12  -6  -2    1.40    2.50 
 -12  -6  -2   -1.10    2.20 
 -12  -6  -2    1.70    2.40 
 -12   6  -2    0.80    2.30 
 -12   6  -2    8.70    2.20 
 -12   6  -2    2.80    2.30 
 -13  -6  -2 1070.19   72.09 
 -13  -6  -2  856.31   71.89 
  13  -6   2 1032.20   71.59 
 -13  -6  -2  944.01   71.79 
 -13   6  -2 1056.29   71.49 
  13   6   2  885.21   71.89 
 -13   6  -2  949.40   71.69 
 -13   6  -2  937.21   71.89 
  14  -6   2   47.60    5.50 
 -14  -6  -2   42.60    5.00 
 -14  -6  -2   38.90    4.80 
 -14  -6  -2   44.40    5.10 
  14   6   2   39.50    5.30 
 -14   6  -2   50.99    5.00 
 -14   6  -2   36.30    4.70 
 -15  -6  -2  435.66   31.10 
  15  -6   2  377.36   31.20 
 -15  -6  -2  358.36   30.90 
  15  -6   2  452.05   30.80 
 -15  -6  -2  364.76   30.80 
 -15   6  -2  385.86   30.90 
 -15   6  -2  449.16   30.70 
  15   6   2  428.26   31.40 
 -16  -6  -2    0.10    2.70 
 -16  -6  -2    2.70    2.90 
  16  -6   2    0.80    2.70 
 -16  -6  -2   -1.00    2.60 
 -16   6  -2   -3.20    2.50 
 -16   6  -2    0.20    2.10 
  16   6   2   -1.00    3.30 
  17  -6   2  250.87   22.20 
 -17  -6  -2  266.37   22.20 
 -17  -6  -2  306.97   22.30 
  17  -6   2  310.77   22.00 
 -17  -6  -2  248.88   22.20 
 -17   6  -2  308.27   21.70 
 -17   6  -2  253.47   22.20 
  17   6   2  341.67   23.00 
  18  -6   2   49.50    6.10 
  18  -6   2   75.29    6.60 
 -18  -6  -2   70.99    6.90 
 -18  -6  -2   49.90    6.60 
  18   6   2   75.89    8.10 
 -18   6  -2   56.49    7.00 
 -18  -7   2    1.50    2.80 
  18  -7  -2    0.50    2.80 
 -18  -7   2    2.10    2.90 
  18   7  -2    3.90    4.00 
 -18   7   2   -0.60    2.70 
 -17  -7   2    9.20    3.10 
  17  -7  -2   10.60    3.20 
  17  -7  -2    7.80    3.70 
 -17  -7   2    8.70    3.20 
 -17  -7   2    9.30    3.40 
  17   7  -2    8.80    4.20 
 -17   7   2    8.30    3.10 
 -16  -7   2   15.20    3.70 
  16  -7  -2   24.10    3.80 
 -16  -7   2   22.40    3.70 
 -16  -7   2   20.20    3.60 
  16  -7  -2   16.70    2.70 
 -16   7   2   14.20    3.40 
  16   7  -2   19.90    4.70 
 -15  -7   2   16.40    3.50 
  15  -7  -2   16.90    2.70 
 -15  -7   2   15.90    3.40 
 -15  -7   2   18.70    3.40 
  15  -7  -2   16.20    3.50 
 -15   7   2   14.20    3.40 
 -15   7   2   15.90    3.30 
  15   7  -2   17.50    4.40 
 -14  -7   2    1.70    2.50 
 -14  -7   2    5.10    2.90 
 -14  -7   2    2.70    2.50 
  14  -7  -2    2.60    1.90 
 -14   7   2    2.10    2.70 
 -14   7   2    5.30    2.60 
  14   7  -2    1.20    3.50 
  13  -7  -2   96.59    8.50 
  13  -7  -2  102.79    9.30 
 -13  -7   2   99.49    9.00 
 -13  -7   2  102.19    9.10 
  13   7  -2   93.09    9.90 
 -13   7   2  114.39    9.10 
 -13   7   2  102.79    9.60 
 -12  -7   2   73.99    7.00 
 -12  -7   2   75.49    7.40 
 -12  -7   2   87.49    7.10 
  12  -7  -2   75.59    7.30 
  12  -7  -2   71.79    6.50 
 -12   7   2   53.99    7.40 
  12   7  -2   71.69    8.00 
 -12   7   2   67.49    6.90 
  11  -7  -2    4.00    2.60 
 -11  -7   2   11.40    1.40 
  11  -7  -2   10.20    2.20 
 -11  -7   2   12.30    2.60 
 -11  -7   2    8.10    2.50 
 -11  -7   2   11.00    2.90 
 -11   7   2    7.90    2.80 
  11   7  -2   11.70    1.30 
  11   7  -2    6.20    3.20 
 -11   7   2   10.00    2.50 
 -10  -7   2   32.10    3.90 
 -10  -7   2   35.40    3.80 
 -10  -7   2   42.70    4.70 
  10  -7  -2   29.60    4.10 
  10  -7  -2   35.10    4.30 
 -10   7   2   32.10    4.20 
  10   7  -2   33.70    3.10 
 -10   7   2   37.50    4.30 
  10   7  -2   26.00    4.10 
  -9  -7   2    9.60    2.30 
  -9  -7   2   11.20    1.20 
  -9  -7   2   11.30    2.70 
  -9  -7   2   15.00    2.60 
   9  -7  -2   12.30    2.20 
   9  -7  -2   11.70    2.70 
   9   7  -2    8.90    2.60 
  -9   7   2   10.30    2.60 
   9   7  -2   10.50    1.60 
  -9   7   2   14.10    2.40 
  -8  -7   2   40.10    5.00 
  -8  -7   2   41.90    4.30 
   8  -7  -2   42.60    4.60 
  -8  -7   2   34.70    3.30 
   8  -7  -2   39.20    4.20 
  -8  -7   2   38.60    4.60 
  -8   7   2   40.50    3.60 
  -8   7   2   46.00    4.80 
   8   7  -2   40.70    3.70 
  -8   7   2   42.00    4.20 
   8   7  -2   41.00    4.50 
  -7  -7   2   75.49    6.80 
  -7  -7   2   70.29    5.80 
  -7  -7   2   71.59    6.30 
   7  -7  -2   75.39    6.50 
  -7   7   2   76.09    6.30 
   7   7  -2   78.29    6.10 
   7   7  -2   67.99    6.80 
  -7   7   2   71.89    6.60 
  -7   7   2   77.19    6.00 
  -6  -7   2  420.86   30.70 
  -6  -7   2  395.56   31.00 
  -6  -7   2  412.06   31.30 
   6  -7  -2  415.86   31.10 
  -6   7   2  425.66   30.90 
  -6   7   2  404.76   31.10 
  -6   7   2  450.25   31.00 
   6   7  -2  407.26   30.90 
   6   7  -2  418.86   31.20 
  -5  -7   2   26.70    3.40 
   5  -7  -2   32.00    3.60 
  -5  -7   2   28.10    2.90 
  -5  -7   2   26.80    2.70 
   5  -7  -2   27.10    2.70 
  -5  -7   2   21.00    3.10 
  -5   7   2   20.10    3.00 
  -5   7   2   27.30    3.00 
  -5   7   2   30.60    2.80 
  -5   7   2   33.20    3.40 
   5   7  -2   24.30    3.10 
   5   7  -2   33.20    3.60 
  -4  -7   2   21.60    3.20 
  -4  -7   2   29.00    2.60 
   4  -7  -2   22.90    2.30 
  -4  -7   2   24.50    3.30 
   4  -7  -2   25.40    3.00 
  -4  -7   2   22.30    2.60 
   4  -7  -2   29.00    2.70 
  -4   7   2   26.20    2.50 
  -4   7   2   27.70    3.10 
   4   7  -2   26.80    3.10 
   4   7  -2   24.40    2.80 
   4   7  -2   29.80    2.50 
   4   7  -2   20.10    2.70 
  -4   7   2   19.80    2.80 
  -4   7   2   27.90    3.00 
   3  -7  -2    2.30    0.60 
  -3  -7   2    2.80    1.70 
  -3  -7   2    2.70    0.90 
   3  -7  -2    5.20    1.80 
  -3  -7   2    2.70    1.70 
   3  -7  -2    2.30    1.20 
  -3  -7   2    1.90    1.00 
  -3   7   2    2.40    1.40 
  -3   7   2    3.70    1.40 
   3   7  -2    3.50    1.10 
  -3   7   2    1.50    1.70 
   3   7  -2    1.60    1.20 
   3   7  -2    2.60    1.60 
   3   7  -2    2.10    1.50 
  -3   7   2    2.00    0.70 
   2  -7  -2  196.78   14.60 
   2  -7  -2  189.88   13.80 
  -2  -7   2  204.28   14.20 
   2  -7  -2  196.58   14.30 
  -2  -7   2  199.08   14.70 
  -2  -7   2  179.08   14.50 
  -2   7   2  195.98   14.40 
  -2   7   2  176.38   14.40 
   2   7  -2  181.68   13.80 
   2   7  -2  167.98   14.30 
   2   7  -2  173.68   14.40 
  -2   7   2  184.88   14.20 
  -1  -7   2   21.00    2.80 
  -1  -7   2   22.40    2.20 
   1  -7  -2   22.80    2.10 
  -1  -7   2   23.00    2.70 
   1  -7  -2   16.70    2.60 
   1  -7  -2   19.50    2.40 
   1   7  -2   20.20    2.40 
   1   7  -2   21.00    2.30 
   1   7  -2   17.40    2.60 
  -1   7   2   21.60    2.30 
   0  -7  -2    8.90    2.10 
   0  -7  -2   10.20    1.90 
   0  -7  -2   10.10    1.30 
   0  -7   2   11.60    1.90 
   0  -7   2    8.40    2.40 
   0  -7   2   11.10    1.20 
   0   7  -2    9.30    1.80 
   0   7   2   11.20    1.90 
   0   7  -2    9.00    1.60 
   0   7   2   12.20    1.90 
   0   7   2    8.00    1.60 
  -1  -7  -2  100.69    9.40 
  -1  -7  -2  109.29    9.00 
   1  -7   2  103.59    8.00 
   1  -7   2  114.39    8.70 
  -1  -7  -2  107.39    8.90 
  -1   7  -2  110.09    8.50 
   1   7   2  108.79    8.90 
  -1   7  -2  104.39    8.50 
   1   7   2  105.59    8.60 
  -1   7  -2  103.29    8.90 
   1   7   2  123.89    8.60 
  -2  -7  -2  512.75   39.70 
  -2  -7  -2  492.85   39.10 
   2  -7   2  567.34   39.40 
   2   7   2  510.65   39.00 
  -2   7  -2  554.74   39.30 
   2   7   2  546.55   39.70 
   2   7   2  554.74   39.00 
  -2   7  -2  505.55   39.30 
  -2   7  -2  512.05   39.60 
   2   7   2  551.84   39.40 
   2   7   2  544.25   39.40 
  -3  -7  -2   84.09    6.60 
   3  -7   2   87.59    6.50 
   3  -7   2   91.19    6.80 
   3  -7   2   77.79    6.40 
  -3  -7  -2   79.89    7.40 
   3   7   2   89.29    7.30 
   3   7   2   82.79    6.90 
   3   7   2   86.59    6.50 
  -3   7  -2   84.39    6.80 
  -3   7  -2   91.39    7.50 
  -4  -7  -2    2.00    1.20 
   4  -7   2    0.00    1.70 
  -4  -7  -2   -0.40    0.90 
  -4  -7  -2    0.50    1.80 
  -4  -7  -2    0.60    1.70 
   4  -7   2    1.00    0.70 
  -4   7  -2    3.00    2.00 
  -4   7  -2    1.70    1.30 
   4   7   2    1.00    1.40 
  -4   7  -2    0.60    1.00 
   4   7   2    1.10    1.10 
  -4   7  -2    0.20    1.00 
   5  -7   2   65.89    6.30 
  -5  -7  -2   60.89    5.50 
  -5  -7  -2   68.99    6.40 
  -5  -7  -2   69.09    6.70 
  -5  -7  -2   74.79    5.90 
  -5   7  -2   69.69    6.50 
  -5   7  -2   72.79    6.00 
  -5   7  -2   69.09    5.60 
  -5   7  -2   78.29    5.80 
   5   7   2   72.79    5.70 
   5   7   2   72.19    6.30 
  -6  -7  -2  632.14   45.50 
  -6  -7  -2  595.84   45.30 
  -6  -7  -2  536.35   44.70 
   6  -7   2  583.84   45.20 
  -6  -7  -2  635.24   45.00 
   6   7   2  636.14   44.80 
  -6   7  -2  620.34   45.30 
  -6   7  -2  590.44   45.00 
  -6   7  -2  637.84   44.90 
   6   7   2  618.74   45.20 
  -7  -7  -2  109.59    9.50 
  -7  -7  -2  126.19    9.20 
  -7  -7  -2  122.99    9.80 
  -7  -7  -2   94.49    8.50 
   7  -7   2  103.59    9.30 
   7   7   2  122.49    8.70 
  -7   7  -2  114.59    9.50 
   7   7   2  113.19    9.60 
  -7   7  -2  118.39    9.30 
  -7   7  -2  119.89    9.10 
  -8  -7  -2  207.18   15.50 
   8  -7   2  196.18   15.10 
  -8  -7  -2  202.38   15.00 
  -8  -7  -2  163.28   14.20 
  -8  -7  -2  192.58   15.20 
  -8  -7  -2  186.18   14.30 
  -8   7  -2  188.48   15.00 
   8   7   2  195.68   15.30 
  -8   7  -2  211.58   14.90 
  -8   7  -2  201.78   15.20 
   9  -7   2    5.50    2.30 
  -9  -7  -2    8.20    2.20 
  -9  -7  -2    5.30    2.30 
  -9  -7  -2    6.80    2.60 
  -9   7  -2    7.20    2.40 
  -9   7  -2    3.90    2.20 
  -9   7  -2    7.90    2.10 
   9   7   2    5.30    2.60 
  10  -7   2   24.50    3.40 
 -10  -7  -2   23.50    3.70 
 -10  -7  -2   25.50    3.30 
 -10  -7  -2   23.20    3.40 
 -10   7  -2   31.40    3.40 
 -10   7  -2   19.70    3.40 
  10   7   2   20.50    3.60 
 -11  -7  -2   39.40    4.90 
 -11  -7  -2   47.30    5.30 
 -11  -7  -2   41.50    4.60 
  11  -7   2   40.10    4.70 
 -11   7  -2   44.70    5.10 
 -11   7  -2   44.00    4.90 
  11   7   2   36.80    5.20 
 -12  -7  -2   -3.80    2.40 
 -12  -7  -2    2.00    2.20 
  12  -7   2    5.50    2.60 
 -12  -7  -2    0.90    2.80 
  12   7   2    1.70    2.80 
 -12   7  -2   -1.80    2.40 
 -12   7  -2    0.90    2.20 
  13  -7   2   73.99    7.30 
 -13  -7  -2   75.09    7.20 
 -13  -7  -2   76.19    7.50 
 -13  -7  -2   76.69    7.40 
 -13   7  -2   69.79    7.10 
 -13   7  -2   72.19    7.30 
  13   7   2   64.29    7.40 
 -14  -7  -2  191.58   15.20 
  14  -7   2  203.28   15.50 
 -14  -7  -2  182.48   15.00 
 -14  -7  -2  177.08   15.30 
  14   7   2  175.98   15.60 
 -14   7  -2  180.68   15.00 
 -14   7  -2  196.08   15.10 
 -15  -7  -2   96.69    9.70 
 -15  -7  -2  117.89    9.80 
  15  -7   2  117.69    9.50 
 -15  -7  -2   94.39    9.60 
 -15   7  -2   98.69    9.50 
  15   7   2  109.69   10.50 
  16  -7   2    5.80    2.70 
  16  -7   2    6.40    2.70 
 -16  -7  -2    5.90    3.00 
  16  -7   2    5.10    3.30 
 -16  -7  -2    0.90    2.70 
 -16  -7  -2    6.40    3.00 
  16   7   2   -0.30    3.50 
 -16   7  -2    1.50    2.70 
 -17  -7  -2   33.60    4.40 
 -17  -7  -2   27.00    4.20 
  17  -7   2   31.50    4.30 
  17  -7   2   19.70    4.20 
 -17  -7  -2   22.50    4.20 
  17  -7   2   43.90    4.40 
 -17   7  -2   28.70    4.30 
  17   7   2   36.50    5.30 
 -18  -7  -2   64.89    6.80 
  18  -7   2   63.39    6.20 
  18  -7   2   67.59    6.40 
 -18  -7  -2   49.40    6.00 
 -18  -7  -2   56.49    6.70 
  18  -7   2   46.70    6.50 
 -18   7  -2   46.00    5.80 
  18   7   2   65.79    6.90 
 -18  -8   2   20.50    3.80 
  18  -8  -2   22.30    4.50 
 -18  -8   2   11.90    3.70 
  18   8  -2   18.70    4.90 
 -18   8   2   17.20    3.40 
  17  -8  -2    6.10    3.10 
 -17  -8   2    0.30    3.00 
 -17  -8   2   -0.80    2.70 
 -17  -8   2    3.00    2.90 
  17   8  -2    4.90    4.40 
 -17   8   2    2.00    2.60 
  16  -8  -2   52.79    5.30 
  16  -8  -2   38.00    4.40 
 -16  -8   2   41.30    4.90 
 -16  -8   2   37.40    5.00 
 -16  -8   2   32.30    4.60 
  16   8  -2   40.50    5.80 
 -16   8   2   32.50    4.50 
 -16   8   2   40.70    5.00 
 -15  -8   2    2.50    2.60 
  15  -8  -2    0.10    1.90 
 -15  -8   2    3.30    3.00 
  15  -8  -2    0.90    2.90 
 -15  -8   2    4.40    2.70 
 -15   8   2    2.90    2.80 
  15   8  -2    4.50    3.50 
 -15   8   2    3.20    2.60 
 -14  -8   2   36.20    4.70 
  14  -8  -2   34.10    4.60 
 -14  -8   2   35.10    4.20 
 -14  -8   2   32.70    4.20 
  14  -8  -2   33.40    3.70 
  14   8  -2   30.50    5.20 
 -14   8   2   30.10    4.10 
 -14   8   2   21.90    4.40 
 -13  -8   2   41.70    4.90 
  13  -8  -2   38.30    4.40 
  13  -8  -2   30.70    4.60 
 -13  -8   2   39.30    4.50 
 -13   8   2   36.90    4.40 
  13   8  -2   35.50    5.10 
 -13   8   2   39.20    5.10 
 -12  -8   2   54.89    6.40 
  12  -8  -2   58.89    5.40 
  12  -8  -2   51.49    6.30 
 -12  -8   2   54.99    5.80 
 -12  -8   2   57.79    6.40 
 -12   8   2   40.40    5.60 
  12   8  -2   51.49    6.00 
 -12   8   2   51.89    5.70 
 -11  -8   2   18.80    2.10 
 -11  -8   2   16.20    2.90 
 -11  -8   2   20.00    3.60 
  11  -8  -2   18.50    2.70 
 -11  -8   2   18.00    3.10 
  11  -8  -2   14.20    3.30 
  11   8  -2   17.50    2.10 
  11   8  -2   16.30    4.20 
 -11   8   2   17.90    3.50 
 -11   8   2   13.60    2.70 
  10  -8  -2  394.36   29.40 
 -10  -8   2  407.36   30.00 
 -10  -8   2  392.06   29.50 
 -10  -8   2  338.07   28.70 
  10  -8  -2  383.26   29.80 
 -10  -8   2  407.46   29.70 
 -10   8   2  393.66   29.70 
 -10   8   2  426.46   29.50 
  10   8  -2  400.06   30.00 
  10   8  -2  391.06   29.00 
  -9  -8   2  394.86   28.60 
  -9  -8   2  405.56   28.90 
   9  -8  -2  378.56   28.60 
   9  -8  -2  368.46   28.90 
  -9  -8   2  366.96   29.10 
  -9  -8   2  344.57   28.00 
  -9   8   2  355.56   28.10 
  -9   8   2  413.06   28.10 
  -9   8   2  417.86   28.60 
  -9   8   2  377.56   28.80 
   9   8  -2  366.86   28.20 
   9   8  -2  389.96   29.00 
   8  -8  -2  155.98   12.30 
  -8  -8   2  153.08   11.60 
  -8  -8   2  154.48   12.80 
  -8  -8   2  159.18   12.20 
   8  -8  -2  145.79   12.60 
  -8  -8   2  151.38   12.50 
  -8   8   2  162.08   11.80 
   8   8  -2  149.88   12.60 
  -8   8   2  168.88   12.40 
   8   8  -2  149.29   11.90 
  -8   8   2  153.28   11.70 
  -8   8   2  152.18   12.40 
  -7  -8   2  935.11   68.69 
  -7  -8   2  896.71   68.39 
   7  -8  -2  902.01   68.69 
  -7  -8   2  920.31   68.09 
  -7   8   2  928.61   68.49 
  -7   8   2  977.10   68.29 
  -7   8   2  986.70   68.19 
   7   8  -2  920.81   68.59 
   7   8  -2  885.51   68.29 
  -6  -8   2  366.16   26.60 
  -6  -8   2  361.96   27.30 
  -6  -8   2  361.46   26.80 
   6  -8  -2  331.17   27.40 
  -6  -8   2  366.46   27.50 
  -6   8   2  330.27   27.20 
  -6   8   2  394.46   26.80 
   6   8  -2  347.47   27.10 
   6   8  -2  348.87   26.90 
  -6   8   2  359.86   27.00 
  -6   8   2  383.36   26.80 
  -5  -8   2 2310.47  164.78 
  -5  -8   2 2331.17  164.08 
  -5  -8   2 2144.89  164.58 
  -5  -8   2 2175.78  164.08 
  -5   8   2 2276.47  164.18 
  -5   8   2 2325.07  163.98 
   5   8  -2 2232.88  164.18 
  -5   8   2 2136.39  164.48 
   5   8  -2 2121.39  164.18 
  -5   8   2 2355.66  164.18 
  -4  -8   2  147.89   12.40 
   4  -8  -2  153.98   12.80 
  -4  -8   2  155.38   12.50 
   4  -8  -2  151.28   11.80 
  -4  -8   2  158.58   11.60 
  -4  -8   2  149.39   11.70 
   4   8  -2  149.49   12.00 
   4   8  -2  161.58   11.60 
  -4   8   2  159.28   11.50 
  -4   8   2  158.18   12.00 
  -4   8   2  141.69   12.20 
   4   8  -2  137.09   12.10 
  -4   8   2  168.68   12.00 
  -3  -8   2  852.21   63.99 
  -3  -8   2  919.61   63.39 
   3  -8  -2  854.61   63.19 
   3  -8  -2  886.61   63.99 
   3  -8  -2  864.71   63.59 
  -3  -8   2  913.51   64.09 
  -3  -8   2  892.81   63.29 
  -3   8   2  837.42   63.79 
  -3   8   2  929.01   63.69 
   3   8  -2  837.82   63.19 
   3   8  -2  776.32   63.79 
  -3   8   2  914.61   63.59 
   3   8  -2  875.31   63.59 
   3   8  -2  781.22   63.69 
   3   8  -2  818.42   63.19 
  -2  -8   2  108.89    9.20 
   2  -8  -2  107.19    8.40 
   2  -8  -2  113.79    8.80 
   2  -8  -2  120.39    9.40 
  -2  -8   2  113.09    9.40 
  -2  -8   2  116.19    8.50 
   2   8  -2   98.79    8.90 
   2   8  -2  110.09    8.80 
  -2   8   2  108.49    9.00 
  -2   8   2  114.69    8.80 
   2   8  -2  101.09    9.00 
  -2   8   2  114.09    9.00 
  -1  -8   2  648.34   46.70 
   1  -8  -2  650.83   46.70 
   1  -8  -2  637.74   47.30 
  -1  -8   2  637.24   47.40 
   1  -8  -2  643.94   47.00 
  -1  -8   2  636.94   47.20 
  -1   8   2  653.23   46.90 
  -1   8   2  641.84   47.10 
   1   8  -2  671.03   46.90 
   1   8  -2  583.14   47.00 
   1   8  -2  577.24   47.10 
   0  -8   2  319.97   23.40 
   0  -8  -2  318.97   23.50 
   0  -8  -2  311.17   24.00 
   0  -8   2  332.57   24.30 
   0  -8  -2  320.47   24.20 
   0  -8   2  312.97   24.00 
   0   8  -2  293.17   23.80 
   0   8   2  322.07   24.00 
   0   8  -2  290.17   24.00 
   0   8   2  328.77   23.70 
   0   8   2  313.87   23.90 
   0   8  -2  339.87   23.70 
  -1  -8  -2    9.40    2.20 
   1  -8   2   11.30    2.50 
   1  -8   2   11.10    1.30 
  -1  -8  -2   12.00    2.70 
  -1  -8  -2   10.60    1.60 
   1  -8   2   15.50    2.30 
  -1   8  -2   13.50    1.80 
   1   8   2   15.40    2.00 
   1   8   2   13.00    2.00 
   1   8   2   10.30    2.10 
  -1   8  -2   14.10    2.50 
  -1   8  -2   13.20    2.00 
  -2  -8  -2   93.49    8.50 
  -2  -8  -2   98.89    8.50 
  -2  -8  -2   95.69    7.70 
   2  -8   2  100.79    8.00 
   2  -8   2  102.09    8.50 
   2   8   2   94.69    7.40 
   2   8   2   95.39    8.30 
  -2   8  -2  100.99    7.90 
  -2   8  -2   92.09    8.40 
   2   8   2  103.59    8.10 
   2   8   2  108.19    7.40 
   2   8   2   94.59    8.40 
  -3  -8  -2  306.07   23.40 
   3  -8   2  289.87   23.30 
  -3  -8  -2  299.77   22.80 
  -3  -8  -2  317.97   23.50 
   3  -8   2  295.77   22.60 
   3  -8   2  319.87   22.90 
  -3   8  -2  295.17   22.90 
   3   8   2  312.07   23.40 
  -3   8  -2  302.17   23.40 
  -3   8  -2  311.47   23.00 
   3   8   2  293.27   22.60 
   3   8   2  319.07   23.00 
   3   8   2  317.27   22.70 
   3   8   2  319.37   23.10 
   4  -8   2  271.47   21.40 
  -4  -8  -2  281.17   21.50 
  -4  -8  -2  294.57   21.50 
  -4  -8  -2  311.67   22.40 
   4  -8   2  279.07   22.10 
  -4  -8  -2  288.97   22.20 
  -4   8  -2  282.67   22.20 
  -4   8  -2  272.77   21.60 
   4   8   2  309.47   21.70 
   4   8   2  303.57   21.90 
  -4   8  -2  298.87   21.80 
  -5  -8  -2  605.54   47.00 
  -5  -8  -2  624.64   47.60 
  -5  -8  -2  662.43   47.10 
   5  -8   2  619.14   47.50 
  -5  -8  -2  637.44   47.70 
  -5   8  -2  632.54   47.20 
  -5   8  -2  675.53   47.00 
   5   8   2  672.93   47.20 
  -5   8  -2  660.23   47.60 
  -5   8  -2  610.24   47.00 
   5   8   2  626.74   47.30 
  -6  -8  -2   10.80    2.60 
   6  -8   2   16.00    2.70 
  -6  -8  -2   13.20    1.70 
  -6  -8  -2   16.30    2.20 
  -6  -8  -2   14.40    3.10 
  -6   8  -2   14.40    2.40 
   6   8   2   10.20    2.40 
   6   8   2   15.40    1.90 
  -6   8  -2   22.60    3.20 
  -6   8  -2   15.30    2.00 
  -7  -8  -2  257.97   20.10 
  -7  -8  -2  227.38   19.30 
  -7  -8  -2  269.07   19.80 
   7  -8   2  262.47   20.10 
  -7  -8  -2  270.97   20.40 
  -7   8  -2  249.08   19.90 
  -7   8  -2  266.57   20.20 
   7   8   2  257.77   20.10 
   7   8   2  271.77   19.50 
  -7   8  -2  280.47   19.70 
  -8  -8  -2  151.68   11.00 
  -8  -8  -2  116.69   10.30 
  -8  -8  -2  144.99   11.30 
  -8  -8  -2  115.59   10.30 
  -8  -8  -2  152.08   11.70 
   8  -8   2  139.69   11.20 
  -8   8  -2  152.08   10.90 
  -8   8  -2  151.98   11.40 
  -8   8  -2  133.49   11.10 
   8   8   2  143.29   11.50 
  -9  -8  -2  104.49    8.50 
  -9  -8  -2   91.79    8.70 
   9  -8   2   90.39    8.60 
  -9  -8  -2  100.29    9.10 
  -9   8  -2  104.59    8.90 
  -9   8  -2  112.29    8.30 
  -9   8  -2   86.79    8.60 
   9   8   2  100.39    9.10 
 -10  -8  -2   59.89    6.40 
 -10  -8  -2   69.39    6.20 
 -10  -8  -2   70.49    6.90 
  10  -8   2   57.59    6.30 
 -10   8  -2   56.39    5.90 
 -10   8  -2   62.39    6.60 
  10   8   2   71.79    7.20 
 -11  -8  -2  228.88   17.20 
  11  -8   2  197.98   17.20 
  11  -8   2  237.38   17.40 
 -11  -8  -2  220.88   17.60 
 -11   8  -2  234.38   17.10 
 -11   8  -2  194.88   17.40 
  11   8   2  220.88   17.70 
  12  -8   2   40.00    4.60 
 -12  -8  -2   43.10    4.80 
  12  -8   2   37.30    4.50 
 -12  -8  -2   34.80    4.30 
  12   8   2   32.80    4.90 
 -12   8  -2   39.40    4.30 
 -12   8  -2   32.30    4.80 
  13  -8   2  586.54   47.10 
 -13  -8  -2  644.14   47.10 
 -13  -8  -2  660.13   47.50 
  13  -8   2  672.83   47.20 
 -13  -8  -2  670.83   47.40 
 -13   8  -2  627.54   47.30 
 -13   8  -2  626.54   47.10 
  13   8   2  559.74   47.50 
  14  -8   2  154.68   12.50 
 -14  -8  -2  147.29   12.30 
  14  -8   2  136.69   12.30 
 -14  -8  -2  159.48   12.70 
 -14  -8  -2  148.99   12.80 
 -14   8  -2  148.59   12.50 
 -14   8  -2  153.98   12.30 
  14   8   2  137.69   13.20 
  15  -8   2  236.98   17.30 
 -15  -8  -2  206.38   17.60 
  15  -8   2  198.78   17.20 
 -15  -8  -2  240.58   17.60 
 -15  -8  -2  212.88   17.30 
  15   8   2  218.18   18.10 
 -15   8  -2  212.58   17.20 
 -16  -8  -2   61.79    6.90 
 -16  -8  -2   69.99    7.30 
  16  -8   2   52.69    6.60 
 -16  -8  -2   55.69    6.50 
  16  -8   2   69.49    6.90 
  16  -8   2   67.39    7.80 
  16   8   2   81.59    7.70 
 -16   8  -2   59.69    6.80 
  17  -8   2   88.99    9.90 
 -17  -8  -2  119.29   12.20 
 -17  -8  -2  113.09    9.90 
  17  -8   2  101.69    9.60 
 -17  -8  -2   92.19    9.40 
  17  -8   2  113.39    9.40 
 -17   8  -2   89.69    9.20 
  17   8   2  123.59   10.80 
 -17  -9   2   37.60    5.40 
  17  -9  -2   56.09    5.70 
 -17  -9   2   38.00    5.00 
 -17  -9   2   55.59    5.80 
 -17   9   2   47.80    5.20 
  17   9  -2   50.29    6.60 
  16  -9  -2    4.50    3.20 
 -16  -9   2    4.80    2.70 
 -16  -9   2    2.40    2.90 
 -16  -9   2    1.70    3.10 
  16   9  -2    1.80    4.00 
 -16   9   2    6.70    2.60 
 -16   9   2    2.60    3.00 
  15  -9  -2   44.60    5.40 
  15  -9  -2   41.60    4.90 
 -15  -9   2   48.90    5.40 
 -15  -9   2   52.99    5.80 
 -15  -9   2   48.50    5.60 
 -15   9   2   47.80    5.50 
  15   9  -2   33.70    5.80 
 -15   9   2   43.70    5.50 
  14  -9  -2   16.80    3.50 
 -14  -9   2    8.50    3.00 
 -14  -9   2   10.90    3.50 
 -14  -9   2    9.00    2.80 
  14  -9  -2   10.40    2.50 
  14   9  -2    3.10    3.70 
 -14   9   2   10.80    2.70 
 -14   9   2   14.10    3.60 
 -13  -9   2   31.80    4.60 
  13  -9  -2   32.90    4.50 
 -13  -9   2   38.10    4.40 
  13  -9  -2   35.00    3.80 
 -13  -9   2   32.40    4.10 
  13   9  -2   27.80    4.90 
 -13   9   2   28.60    4.80 
 -13   9   2   31.80    4.00 
 -12  -9   2   98.19    8.40 
  12  -9  -2   90.39    8.90 
  12  -9  -2   85.99    8.10 
 -12  -9   2  103.49    8.70 
 -12  -9   2   97.29    9.10 
  12   9  -2   79.79    9.40 
 -12   9   2   89.79    8.20 
 -12   9   2  101.79    9.10 
 -11  -9   2   28.50    3.50 
  11  -9  -2   29.90    4.50 
 -11  -9   2   26.20    4.10 
 -11  -9   2   23.70    3.80 
  11  -9  -2   25.00    3.40 
  11   9  -2   29.20    4.30 
  11   9  -2   29.40    2.80 
 -11   9   2   28.00    3.50 
 -11   9   2   24.10    4.00 
 -10  -9   2   86.19    8.60 
 -10  -9   2   81.59    6.80 
  10  -9  -2   89.89    7.90 
  10  -9  -2   89.99    8.50 
 -10  -9   2   89.39    7.80 
 -10  -9   2   93.49    8.20 
 -10   9   2   87.29    8.40 
 -10   9   2  100.29    7.70 
  10   9  -2   92.49    7.10 
   9  -9  -2   86.49    8.40 
  -9  -9   2   98.09    8.10 
  -9  -9   2   91.69    7.70 
  -9  -9   2   88.59    8.40 
  -9  -9   2   85.19    6.90 
   9  -9  -2   88.09    7.80 
  -9   9   2   94.79    8.20 
   9   9  -2   84.19    7.20 
  -9   9   2   93.19    7.00 
  -9   9   2   81.59    6.90 
   9   9  -2   91.69    8.50 
  -9   9   2   93.59    7.50 
  -8  -9   2   63.09    6.60 
   8  -9  -2   63.29    5.90 
  -8  -9   2   56.99    4.90 
  -8  -9   2   53.59    6.10 
  -8  -9   2   60.69    5.60 
   8  -9  -2   58.79    6.40 
   8   9  -2   61.59    5.30 
  -8   9   2   65.59    6.10 
  -8   9   2   57.39    6.00 
  -8   9   2   61.59    5.10 
   8   9  -2   59.29    6.40 
  -7  -9   2   58.59    6.20 
  -7  -9   2   54.49    6.40 
   7  -9  -2   62.59    6.10 
  -7  -9   2   64.59    5.10 
  -7  -9   2   62.39    5.60 
  -7   9   2   67.19    5.40 
   7   9  -2   60.19    5.90 
  -7   9   2   63.49    6.10 
  -7   9   2   64.59    5.40 
   7   9  -2   61.09    6.30 
  -6  -9   2    1.40    2.20 
  -6  -9   2    1.70    1.40 
   6  -9  -2    2.60    2.10 
  -6  -9   2    1.20    1.10 
  -6  -9   2    6.40    2.50 
  -6   9   2    1.30    1.40 
  -6   9   2    1.60    1.20 
   6   9  -2    1.50    1.60 
  -6   9   2    0.00    1.80 
   6   9  -2    5.80    2.20 
  -5  -9   2   19.00    3.40 
  -5  -9   2   25.10    2.70 
  -5  -9   2   24.70    3.60 
  -5  -9   2   23.10    2.40 
   5  -9  -2   28.50    3.50 
   5  -9  -2   16.90    2.10 
   5   9  -2   21.30    3.00 
  -5   9   2   32.10    3.20 
  -5   9   2   25.30    2.40 
  -5   9   2   25.00    3.00 
   5   9  -2   25.60    2.90 
  -5   9   2   27.90    3.60 
   4  -9  -2  199.98   15.80 
   4  -9  -2  225.98   16.50 
  -4  -9   2  210.08   15.60 
   4  -9  -2  196.28   15.40 
  -4  -9   2  219.48   16.60 
  -4  -9   2  211.88   15.70 
  -4  -9   2  213.58   16.50 
   4   9  -2  201.58   15.50 
   4   9  -2  211.28   16.00 
   4   9  -2  208.58   16.60 
  -4   9   2  202.58   16.30 
  -4   9   2  207.08   16.00 
   4   9  -2  198.78   16.10 
  -4   9   2  226.38   16.00 
   3  -9  -2    9.20    2.50 
   3  -9  -2    7.20    1.10 
  -3  -9   2    4.30    1.40 
  -3  -9   2    8.10    2.30 
  -3  -9   2    7.90    2.70 
   3  -9  -2    9.20    1.70 
  -3   9   2    8.10    1.90 
  -3   9   2    8.50    2.30 
   3   9  -2    6.10    1.80 
   3   9  -2    8.00    2.10 
  -3   9   2    7.00    1.80 
   3   9  -2    6.70    1.90 
   2  -9  -2   82.99    7.20 
  -2  -9   2   72.79    7.00 
  -2  -9   2   81.09    6.20 
  -2  -9   2   76.49    7.30 
   2  -9  -2   75.99    6.10 
   2  -9  -2   74.59    6.60 
  -2   9   2   81.19    6.70 
   2   9  -2   71.09    6.70 
  -2   9   2   74.39    6.90 
  -2   9   2   84.59    6.60 
   2   9  -2   72.49    6.90 
   2   9  -2   78.09    6.50 
  -1  -9   2    3.00    1.20 
   1  -9  -2    3.10    2.10 
   1  -9  -2    4.10    1.20 
  -1  -9   2    5.10    2.30 
   1  -9  -2    3.90    1.60 
  -1  -9   2    4.00    2.00 
   1   9  -2    4.30    1.60 
   1   9  -2    2.50    1.90 
   1   9  -2    2.80    1.60 
  -1   9   2    4.00    1.90 
  -1   9   2    3.50    1.50 
   0  -9  -2   31.90    3.10 
   0  -9  -2   28.50    3.60 
   0  -9   2   29.60    3.60 
   0  -9  -2   30.40    4.00 
   0  -9   2   31.60    4.10 
   0  -9   2   33.30    3.00 
   0   9   2   30.20    3.50 
   0   9   2   33.60    3.60 
   0   9  -2   32.60    3.40 
   0   9  -2   30.50    3.40 
   0   9   2   34.50    3.90 
   0   9  -2   26.50    3.60 
  -1  -9  -2  119.09    9.60 
   1  -9   2  118.99   10.00 
   1  -9   2  115.29    9.40 
  -1  -9  -2  113.39    8.90 
  -1  -9  -2  116.59    9.90 
   1  -9   2  116.79    8.80 
  -1   9  -2  114.19    9.80 
  -1   9  -2  117.39    9.20 
   1   9   2  109.69    9.50 
   1   9   2  120.79    9.40 
   1   9   2  114.79    9.20 
  -1   9  -2  109.09    9.70 
  -2  -9  -2  293.47   22.00 
  -2  -9  -2  299.37   22.70 
   2  -9   2  291.17   22.80 
   2  -9   2  265.27   21.70 
   2  -9   2  294.57   22.50 
  -2  -9  -2  303.97   22.70 
   2   9   2  303.77   22.60 
  -2   9  -2  282.67   22.20 
   2   9   2  297.77   22.20 
  -2   9  -2  291.97   22.60 
  -2   9  -2  313.87   22.20 
   2   9   2  317.87   22.40 
  -3  -9  -2    8.40    1.50 
   3  -9   2   11.30    2.50 
  -3  -9  -2    9.20    2.50 
  -3  -9  -2    6.80    2.30 
   3  -9   2   10.00    1.70 
  -3   9  -2    8.90    1.90 
   3   9   2    9.50    1.10 
   3   9   2    9.10    2.40 
   3   9   2   13.40    1.40 
   3   9   2   11.30    2.00 
  -3   9  -2    8.10    2.40 
  -3   9  -2    8.70    1.70 
   3   9   2   12.10    2.10 
  -4  -9  -2   96.89    8.40 
  -4  -9  -2   96.49    7.30 
   4  -9   2   86.29    7.00 
   4  -9   2   91.09    8.20 
   4  -9   2   81.09    7.20 
  -4  -9  -2  104.39    8.40 
   4   9   2   88.69    7.80 
   4   9   2   91.19    7.10 
   4   9   2  101.29    7.70 
  -4   9  -2   97.99    7.70 
  -4   9  -2  102.19    8.40 
  -4   9  -2   94.29    7.50 
  -5  -9  -2  157.08   11.40 
  -5  -9  -2  147.69   12.40 
   5  -9   2  143.39   11.20 
  -5  -9  -2  153.98   11.30 
  -5  -9  -2  144.79   12.10 
   5  -9   2  139.09   12.10 
   5  -9   2  161.28   11.40 
  -5   9  -2  146.29   11.70 
   5   9   2  145.89   11.90 
  -5   9  -2  141.69   11.40 
   5   9   2  158.38   11.60 
  -5   9  -2  139.09   12.10 
  -6  -9  -2    4.80    2.30 
   6  -9   2    8.50    2.50 
  -6  -9  -2   11.30    3.00 
  -6  -9  -2    7.70    1.70 
  -6  -9  -2    9.20    1.50 
  -6   9  -2   11.40    2.80 
  -6   9  -2    7.70    1.30 
   6   9   2    7.90    2.40 
  -6   9  -2    6.70    2.00 
   6   9   2    9.50    1.70 
  -6   9  -2    8.30    1.50 
   7  -9   2  239.28   19.20 
  -7  -9  -2  230.38   18.40 
  -7  -9  -2  253.57   19.30 
  -7  -9  -2  253.87   18.80 
  -7  -9  -2  260.87   19.50 
  -7   9  -2  232.08   18.90 
   7   9   2  244.68   19.20 
  -7   9  -2  245.78   19.30 
  -7   9  -2  248.08   18.60 
   7   9   2  266.47   18.60 
   8  -9   2   -0.70    2.10 
  -8  -9  -2    2.60    2.30 
  -8  -9  -2    1.00    1.70 
  -8  -9  -2    0.50    2.30 
  -8  -9  -2    0.40    0.90 
  -8   9  -2   -0.50    2.30 
  -8   9  -2    0.30    2.00 
  -8   9  -2    0.50    1.50 
   8   9   2    1.80    2.50 
  -9  -9  -2    2.90    2.00 
  -9  -9  -2    6.10    2.70 
   9  -9   2    3.20    2.40 
  -9  -9  -2    2.40    2.30 
  -9  -9  -2    3.90    1.00 
  -9   9  -2    2.80    2.20 
   9   9   2    5.40    2.70 
  -9   9  -2    3.30    1.70 
  -9   9  -2    0.20    2.40 
 -10  -9  -2   23.70    3.20 
  10  -9   2   21.60    3.50 
 -10  -9  -2   20.40    3.80 
 -10  -9  -2   28.50    3.90 
  10   9   2   23.40    4.00 
 -10   9  -2   20.50    2.90 
 -10   9  -2   22.60    3.60 
  11  -9   2    8.90    2.70 
 -11  -9  -2    6.50    2.40 
 -11  -9  -2    8.40    3.10 
 -11  -9  -2   10.40    2.90 
  11  -9   2   10.20    3.10 
 -11   9  -2    8.40    2.90 
  11   9   2    7.90    3.30 
 -11   9  -2    7.10    2.20 
  12  -9   2   45.80    4.90 
 -12  -9  -2   38.40    4.60 
 -12  -9  -2   39.10    4.30 
 -12  -9  -2   35.00    4.70 
  12  -9   2   30.40    4.40 
  12   9   2   36.40    5.20 
 -12   9  -2   31.10    4.60 
 -12   9  -2   39.70    4.60 
 -13  -9  -2   28.10    4.50 
 -13  -9  -2   30.20    4.40 
 -13  -9  -2   31.20    4.00 
  13  -9   2   35.20    4.40 
  13  -9   2   33.60    4.20 
 -13   9  -2   32.00    4.50 
  13   9   2   23.00    4.70 
 -13   9  -2   29.90    3.90 
 -14  -9  -2    6.50    3.00 
 -14  -9  -2    6.70    2.70 
  14  -9   2    6.40    2.70 
 -14  -9  -2    2.30    3.10 
  14  -9   2    6.70    3.00 
 -14   9  -2    6.90    3.00 
 -14   9  -2    5.30    2.50 
  14   9   2    5.80    3.70 
 -15  -9  -2   82.79    7.80 
 -15  -9  -2   74.79    7.90 
  15  -9   2   72.99    7.50 
  15  -9   2   69.59    7.20 
 -15  -9  -2   72.19    7.20 
 -15   9  -2   61.99    7.00 
  15   9   2   64.89    7.60 
 -15   9  -2   71.69    7.40 
  16  -9   2   10.70    4.10 
 -16  -9  -2   14.60    3.70 
 -16  -9  -2   14.30    3.30 
  16  -9   2   17.00    3.50 
 -16  -9  -2   20.60    4.00 
 -16   9  -2   17.00    3.20 
  16 -10  -2    0.00    3.10 
 -16 -10   2    3.80    3.20 
 -16 -10   2    6.80    2.80 
 -16 -10   2    4.10    3.10 
 -16  10   2    5.50    2.50 
 -16  10   2    8.10    3.30 
  16  10  -2    4.00    4.30 
 -15 -10   2   18.60    4.00 
 -15 -10   2   20.90    3.70 
 -15 -10   2   19.10    3.40 
  15 -10  -2   18.70    3.00 
  15 -10  -2   18.00    3.80 
 -15  10   2   21.50    3.20 
 -15  10   2   15.10    4.00 
  15  10  -2   18.50    4.50 
  14 -10  -2    0.10    2.00 
  14 -10  -2    0.90    3.10 
 -14 -10   2    0.80    3.10 
 -14 -10   2    2.80    2.90 
 -14 -10   2    6.90    2.60 
 -14  10   2    1.40    2.10 
  14  10  -2   -0.40    3.80 
 -14  10   2    1.00    3.20 
  13 -10  -2   86.99    7.90 
  13 -10  -2   91.09    8.80 
 -13 -10   2   80.59    8.90 
 -13 -10   2   89.89    8.10 
 -13 -10   2   99.19    8.60 
 -13  10   2   86.89    9.10 
  13  10  -2   80.89    9.40 
 -13  10   2   89.59    7.80 
 -12 -10   2    3.80    2.40 
 -12 -10   2    4.60    2.80 
  12 -10  -2    0.50    2.10 
 -12 -10   2    2.60    3.60 
  12 -10  -2    2.90    3.00 
  12  10  -2    2.70    3.50 
 -12  10   2    4.60    2.10 
 -12  10   2    2.20    3.00 
  11 -10  -2    6.50    2.40 
 -11 -10   2    4.70    2.30 
 -11 -10   2    4.90    2.80 
 -11 -10   2    8.70    3.20 
  11 -10  -2    6.90    3.10 
 -11  10   2    5.10    2.10 
  11  10  -2    3.90    3.20 
 -11  10   2    5.10    2.80 
  11  10  -2    7.80    1.40 
 -10 -10   2   78.79    6.50 
  10 -10  -2   88.59    8.30 
 -10 -10   2   87.49    8.50 
 -10 -10   2   97.89    8.00 
  10 -10  -2   83.49    7.70 
 -10 -10   2   89.49    7.50 
 -10  10   2   82.19    8.10 
  10  10  -2   84.39    8.40 
  10  10  -2   79.69    6.80 
 -10  10   2   80.29    7.10 
   9 -10  -2  201.48   19.30 
  -9 -10   2  228.48   16.50 
   9 -10  -2  229.68   17.30 
  -9 -10   2  234.48   17.00 
  -9 -10   2  223.88   17.80 
   9  10  -2  221.78   16.70 
  -9  10   2  215.18   16.50 
  -9  10   2  205.08   16.50 
  -9  10   2  230.48   16.80 
   9  10  -2  223.18   17.70 
  -9  10   2  210.78   17.40 
   8 -10  -2  116.09   10.50 
   8 -10  -2  119.69   10.20 
  -8 -10   2  120.79    9.70 
  -8 -10   2  118.29   10.40 
  -8 -10   2  118.99    9.20 
  -8 -10   2  120.49   10.70 
  -8  10   2  126.49    9.40 
   8  10  -2  123.09   10.40 
   8  10  -2  111.79    9.50 
  -8  10   2  114.89   10.10 
  -8  10   2  127.69    9.50 
  -7 -10   2  436.56   31.40 
   7 -10  -2  417.66   31.30 
  -7 -10   2  397.26   30.70 
  -7 -10   2  426.96   30.60 
  -7 -10   2  418.66   31.60 
   7  10  -2  414.26   30.90 
  -7  10   2  418.56   30.60 
  -7  10   2  394.26   31.00 
   7  10  -2  394.76   31.10 
  -6 -10   2  252.87   18.70 
  -6 -10   2  223.28   17.90 
  -6 -10   2  245.68   17.80 
   6 -10  -2  240.08   18.60 
  -6 -10   2  229.08   18.80 
   6  10  -2  229.18   18.20 
   6  10  -2  222.88   18.30 
  -6  10   2  265.57   18.10 
  -6  10   2  239.78   17.70 
  -6  10   2  230.28   18.30 
   5 -10  -2  572.34   42.00 
  -5 -10   2  605.44   42.10 
  -5 -10   2  603.54   41.30 
  -5 -10   2  548.55   42.10 
  -5 -10   2  542.15   41.20 
  -5  10   2  546.85   41.90 
   5  10  -2  543.95   41.60 
  -5  10   2  520.05   41.60 
  -5  10   2  592.84   41.60 
   5  10  -2  527.65   41.60 
  -4 -10   2   72.99    5.80 
  -4 -10   2   75.99    6.20 
   4 -10  -2   71.89    5.90 
  -4 -10   2   72.19    7.30 
   4 -10  -2   72.19    6.30 
  -4 -10   2   80.29    7.50 
   4 -10  -2   76.99    7.20 
  -4  10   2   70.39    7.00 
   4  10  -2   77.09    6.70 
  -4  10   2   90.79    6.60 
  -4  10   2   76.89    6.70 
   4  10  -2   71.49    6.70 
  -3 -10   2  146.29   11.70 
  -3 -10   2  139.59   11.80 
   3 -10  -2  135.69   10.60 
   3 -10  -2  144.49   11.70 
  -3 -10   2  148.39   10.80 
   3 -10  -2  132.59   11.00 
  -3  10   2  139.99   11.10 
  -3  10   2  150.28   11.20 
  -3  10   2  143.09   11.50 
   3  10  -2  131.09   11.30 
   3  10  -2  140.49   11.10 
   3  10  -2  136.29   11.40 
   2 -10  -2   56.49    4.70 
  -2 -10   2   53.59    5.80 
   2 -10  -2   56.29    5.20 
   2 -10  -2   55.59    6.00 
  -2 -10   2   64.29    6.30 
  -2 -10   2   53.29    4.80 
   2  10  -2   60.59    5.20 
   2  10  -2   55.19    5.70 
  -2  10   2   57.89    5.30 
  -2  10   2   57.09    5.70 
  -2  10   2   57.19    5.30 
   2  10  -2   44.90    5.30 
  -1 -10   2  143.99   11.50 
   1 -10  -2  143.79   10.70 
   1 -10  -2  138.39   11.10 
   1 -10  -2  136.19   11.70 
  -1 -10   2  137.99   11.70 
  -1 -10   2  140.49   10.70 
  -1  10   2  154.88   11.10 
   1  10  -2  124.89   11.40 
   1  10  -2  131.79   11.10 
   1  10  -2  143.69   11.00 
  -1  10   2  137.69   11.30 
   0 -10   2    2.60    1.20 
   0 -10   2    1.70    2.50 
   0 -10  -2    2.00    2.30 
   0 -10  -2    2.00    1.80 
   0 -10   2    4.20    1.80 
   0 -10  -2    1.00    1.20 
   0  10   2    2.60    1.80 
   0  10   2    2.00    1.50 
   0  10   2    4.10    1.80 
   0  10  -2    3.10    1.50 
   0  10  -2    4.00    1.60 
   0  10  -2    1.00    2.00 
   1 -10   2   61.29    6.60 
  -1 -10  -2   61.39    6.00 
   1 -10   2   59.79    5.00 
  -1 -10  -2   62.79    5.20 
   1 -10   2   53.09    5.60 
  -1 -10  -2   54.69    6.40 
   1  10   2   62.79    5.80 
  -1  10  -2   63.09    6.20 
  -1  10  -2   68.49    5.60 
   1  10   2   64.19    5.90 
   1  10   2   63.29    5.60 
   2 -10   2   31.70    4.40 
  -2 -10  -2   40.50    4.80 
   2 -10   2   38.50    3.30 
  -2 -10  -2   43.60    3.70 
  -2 -10  -2   44.90    5.10 
  -2  10  -2   31.50    4.10 
  -2  10  -2   41.80    4.10 
   2  10   2   38.10    4.20 
   2  10   2   39.00    4.50 
   2  10   2   40.60    4.30 
  -2  10  -2   34.10    4.00 
  -3 -10  -2   18.60    3.40 
   3 -10   2   22.00    2.00 
  -3 -10  -2   22.00    2.30 
   3 -10   2   22.70    2.60 
  -3 -10  -2   22.30    3.40 
   3 -10   2   24.40    3.60 
  -3  10  -2   20.10    3.20 
  -3  10  -2   21.30    2.70 
   3  10   2   25.10    2.90 
  -3  10  -2   20.00    2.70 
   3  10   2   20.80    2.90 
  -4 -10  -2    4.10    2.40 
   4 -10   2    1.50    2.30 
  -4 -10  -2    2.40    1.30 
  -4 -10  -2    6.20    2.50 
  -4  10  -2    2.80    1.40 
  -4  10  -2    4.30    1.80 
   4  10   2    8.10    1.80 
   4  10   2    0.10    1.80 
   4  10   2    4.70    1.10 
  -4  10  -2    6.80    2.40 
   4  10   2    5.30    0.90 
   5 -10   2   24.70    2.40 
  -5 -10  -2   26.40    3.60 
  -5 -10  -2   30.20    4.00 
  -5 -10  -2   31.10    2.90 
   5 -10   2   24.20    2.40 
   5 -10   2   26.50    3.70 
  -5  10  -2   30.70    3.20 
   5  10   2   35.80    3.50 
   5  10   2   26.30    2.70 
  -5  10  -2   21.90    3.40 
  -5  10  -2   30.30    3.10 
   5  10   2   25.40    3.20 
   6 -10   2   23.50    3.60 
  -6 -10  -2   24.10    3.70 
   6 -10   2   21.90    2.60 
  -6 -10  -2   32.20    2.90 
  -6 -10  -2   28.70    3.80 
   6  10   2   31.40    3.30 
   6  10   2   29.40    3.60 
  -6  10  -2   28.30    3.80 
  -6  10  -2   24.70    2.80 
  -6  10  -2   22.70    3.10 
  -7 -10  -2  201.08   15.50 
  -7 -10  -2  196.28   14.20 
   7 -10   2  201.08   15.20 
  -7 -10  -2  200.78   15.20 
  -7 -10  -2  190.28   14.50 
  -7  10  -2  179.68   14.80 
  -7  10  -2  162.28   14.10 
   7  10   2  192.58   15.10 
  -7  10  -2  199.28   15.30 
  -8 -10  -2    3.30    2.90 
   8 -10   2    3.00    2.40 
  -8 -10  -2    2.20    2.60 
  -8 -10  -2    4.60    1.20 
  -8 -10  -2    2.60    1.80 
  -8  10  -2    5.00    2.60 
  -8  10  -2    1.30    2.20 
   9 -10   2   30.90    3.90 
  -9 -10  -2   22.00    2.70 
  -9 -10  -2   28.80    4.00 
  -9 -10  -2   27.60    2.60 
  -9 -10  -2   23.50    3.80 
  -9 -10  -2   32.90    3.40 
   9  10   2   30.30    4.30 
  -9  10  -2   26.20    3.00 
  -9  10  -2   20.50    3.50 
  -9  10  -2   33.60    4.40 
 -10 -10  -2   19.30    3.80 
  10 -10   2   23.80    3.60 
 -10 -10  -2   23.30    3.10 
 -10 -10  -2   18.80    3.40 
 -10  10  -2   19.60    2.70 
 -10  10  -2   18.40    3.50 
  10  10   2   19.90    3.80 
  11 -10   2  139.49   12.40 
 -11 -10  -2  158.38   12.00 
  11 -10   2  152.48   12.50 
 -11 -10  -2  141.29   12.80 
 -11 -10  -2  154.78   12.50 
 -11  10  -2  144.39   11.70 
 -11  10  -2  144.59   12.50 
  11  10   2  146.29   12.90 
  12 -10   2   67.29    7.00 
 -12 -10  -2   66.69    6.50 
 -12 -10  -2   61.49    6.80 
  12 -10   2   56.89    6.60 
 -12 -10  -2   65.89    7.20 
 -12  10  -2   58.19    5.80 
  12  10   2   55.89    6.70 
 -12  10  -2   50.19    6.20 
  13 -10   2  471.45   37.00 
 -13 -10  -2  503.75   36.80 
 -13 -10  -2  501.05   37.30 
 -13 -10  -2  542.65   37.20 
  13 -10   2  533.25   37.00 
 -13  10  -2  451.55   36.60 
  13  10   2  459.35   37.40 
 -13  10  -2  453.55   37.10 
 -14 -10  -2  242.78   17.90 
  14 -10   2  244.68   17.70 
 -14 -10  -2  221.88   17.40 
 -14 -10  -2  230.98   18.00 
  14 -10   2  210.58   17.50 
 -14  10  -2  211.48   17.70 
  14  10   2  198.88   18.20 
 -14  10  -2  205.38   17.10 
 -15 -10  -2  340.37   24.30 
 -15 -10  -2  314.27   23.80 
  15 -10   2  296.57   23.90 
  15 -10   2  344.17   24.10 
 -15 -10  -2  323.87   24.40 
  15  10   2  280.37   24.60 
 -15  10  -2  307.57   24.00 
 -15  10  -2  273.97   23.60 
 -16 -10  -2  189.58   15.60 
  16 -10   2  220.18   15.90 
 -16 -10  -2  188.08   16.10 
 -16 -10  -2  207.58   16.80 
  16 -10   2  186.48   15.60 
  16  10   2  192.28   16.70 
 -16  10  -2  184.28   15.40 
 -15 -11   2    5.60    3.10 
 -15 -11   2    4.20    2.60 
 -15 -11   2    6.30    3.40 
  15 -11  -2    4.90    3.30 
 -15  11   2    5.30    3.50 
 -15  11   2    8.00    2.40 
 -14 -11   2   28.60    4.60 
  14 -11  -2   22.70    3.40 
 -14 -11   2   23.40    3.50 
 -14 -11   2   21.60    4.00 
  14 -11  -2   24.20    4.20 
 -14  11   2   26.20    4.70 
  14  11  -2   18.80    4.70 
 -14  11   2   23.10    3.20 
 -13 -11   2    2.00    2.70 
 -13 -11   2    0.30    2.20 
  13 -11  -2    1.40    2.20 
 -13 -11   2    2.40    3.20 
  13 -11  -2    1.60    3.10 
 -13  11   2   -2.80    3.00 
  13  11  -2    3.30    3.60 
 -13  11   2    0.00    1.90 
 -12 -11   2   64.59    6.60 
 -12 -11   2   57.79    6.50 
  12 -11  -2   57.89    6.00 
 -12 -11   2   56.39    5.80 
  12 -11  -2   50.79    6.20 
 -12  11   2   44.80    6.10 
 -12  11   2   54.29    5.40 
  12  11  -2   62.39    6.60 
 -11 -11   2    0.70    2.70 
  11 -11  -2    0.20    2.20 
  11 -11  -2   -2.10    2.90 
 -11 -11   2   -1.00    2.00 
 -11 -11   2    0.50    0.90 
 -11 -11   2    0.00    3.10 
  11  11  -2    3.20    3.10 
  11  11  -2    1.10    1.40 
 -11  11   2   -1.10    1.60 
 -11  11   2    2.10    2.80 
 -10 -11   2    2.20    2.00 
 -10 -11   2    1.10    2.60 
  10 -11  -2    1.00    2.90 
 -10 -11   2   -2.60    2.80 
  10 -11  -2    3.50    2.30 
 -10 -11   2   -0.40    1.10 
 -10  11   2    3.00    1.60 
  10  11  -2   -2.70    2.70 
 -10  11   2    0.30    2.60 
  10  11  -2   -0.20    1.40 
  -9 -11   2    3.50    2.70 
   9 -11  -2    0.30    2.80 
  -9 -11   2    3.40    1.20 
  -9 -11   2    1.50    1.80 
   9 -11  -2    2.10    2.30 
  -9 -11   2    1.10    2.60 
  -9  11   2    1.10    1.40 
  -9  11   2    1.80    2.50 
   9  11  -2    0.90    2.60 
   9  11  -2    0.80    1.50 
  -9  11   2    1.20    1.20 
  -9  11   2    2.30    1.30 
  -8 -11   2   31.40    3.70 
   8 -11  -2   31.90    4.20 
   8 -11  -2   26.50    4.10 
  -8 -11   2   35.90    3.20 
  -8 -11   2   31.60    4.60 
  -8 -11   2   28.80    4.10 
  -8  11   2   36.60    3.40 
  -8  11   2   32.00    3.20 
   8  11  -2   26.90    4.00 
   8  11  -2   32.80    3.70 
  -8  11   2   31.00    4.10 
   7 -11  -2  159.28   13.70 
   7 -11  -2  149.39   12.80 
  -7 -11   2  157.88   12.00 
  -7 -11   2  154.88   13.20 
  -7 -11   2  159.48   11.90 
  -7 -11   2  175.68   15.10 
   7  11  -2  151.18   12.30 
   7  11  -2  148.39   12.70 
  -7  11   2  155.68   11.80 
  -7  11   2  163.48   12.10 
  -7  11   2  148.39   12.60 
   6 -11  -2  255.57   20.00 
  -6 -11   2  242.48   19.10 
  -6 -11   2  251.77   20.30 
  -6 -11   2  277.27   20.10 
  -6 -11   2  265.77   19.20 
  -6  11   2  284.67   19.40 
   6  11  -2  249.28   19.50 
  -6  11   2  243.28   19.60 
   6  11  -2  233.28   19.60 
  -5 -11   2  121.49   10.40 
   5 -11  -2  119.89   10.10 
  -5 -11   2  120.09    9.10 
  -5 -11   2  130.29   10.30 
   5 -11  -2  114.49    8.90 
  -5  11   2  115.99    9.60 
   5  11  -2  110.19    9.60 
   5  11  -2  102.09    8.70 
  -5  11   2  122.49   10.10 
  -5  11   2  130.29    9.50 
   5  11  -2  109.69    9.60 
   4 -11  -2    2.10    1.10 
  -4 -11   2    2.00    2.40 
  -4 -11   2    0.10    2.30 
   4 -11  -2    4.40    2.40 
  -4 -11   2   -1.10    1.30 
   4 -11  -2    0.80    1.30 
  -4  11   2   -2.50    2.10 
   4  11  -2    1.30    1.90 
  -4  11   2    0.10    1.50 
  -4  11   2    0.30    1.80 
   4  11  -2    2.70    2.00 
   3 -11  -2   13.40    1.80 
  -3 -11   2   10.70    2.80 
  -3 -11   2   12.80    3.20 
  -3 -11   2   13.50    2.00 
   3 -11  -2   14.00    3.00 
   3  11  -2   16.00    2.50 
  -3  11   2   16.70    2.60 
   3  11  -2   12.80    2.50 
  -3  11   2   11.60    2.30 
   3  11  -2   10.80    2.20 
  -3  11   2   10.70    2.60 
  -2 -11   2   41.10    4.00 
  -2 -11   2   49.99    5.80 
   2 -11  -2   43.80    5.50 
   2 -11  -2   42.80    3.90 
  -2 -11   2   39.20    5.10 
   2 -11  -2   44.70    4.40 
   2  11  -2   46.10    4.50 
  -2  11   2   47.80    4.60 
  -2  11   2   39.80    5.00 
   2  11  -2   35.30    4.50 
   2  11  -2   39.60    5.00 
  -2  11   2   47.40    5.30 
  -1 -11   2    2.50    2.00 
  -1 -11   2    2.00    2.60 
   1 -11  -2    1.60    1.30 
   1 -11  -2    1.50    1.70 
  -1 -11   2    1.30    1.30 
   1 -11  -2    0.00    2.30 
   1  11  -2   -0.10    2.10 
  -1  11   2    2.80    2.10 
   1  11  -2    0.60    1.60 
   1  11  -2    2.20    1.60 
  -1  11   2    1.20    1.50 
  -1  11   2    3.40    1.70 
   0 -11  -2   72.39    7.50 
   0 -11   2   68.99    7.60 
   0 -11   2   75.19    6.20 
   0 -11  -2   76.79    6.90 
   0 -11   2   75.99    7.00 
   0 -11  -2   78.09    6.30 
   0  11   2   81.79    6.70 
   0  11  -2   80.79    6.80 
   0  11   2   80.59    6.90 
   0  11  -2   70.59    7.20 
   0  11  -2   76.69    6.60 
   0  11   2   74.09    7.00 
  -1 -11  -2  114.69   10.10 
   1 -11   2  113.19    9.50 
   1 -11   2  112.49   10.20 
  -1 -11  -2  112.99    9.00 
   1 -11   2  114.69    8.90 
  -1 -11  -2  121.69    9.80 
   1  11   2  122.79    9.70 
   1  11   2  121.19    9.70 
  -1  11  -2  122.09    9.50 
   1  11   2  105.09    9.30 
  -1  11  -2  114.49    9.30 
  -1  11  -2  109.39    9.90 
  -2 -11  -2   93.89    7.20 
   2 -11   2   90.29    7.50 
   2 -11   2   87.19    7.00 
  -2 -11  -2   93.39    8.40 
  -2 -11  -2   83.99    8.10 
   2 -11   2   80.79    8.50 
   2  11   2   85.99    7.90 
  -2  11  -2   89.29    8.20 
  -2  11  -2   96.19    7.60 
   2  11   2   91.59    7.80 
  -2  11  -2   95.19    7.60 
   2  11   2   86.99    7.60 
  -3 -11  -2   14.00    3.10 
   3 -11   2   11.60    3.10 
  -3 -11  -2   12.90    3.00 
  -3 -11  -2   12.90    1.90 
  -3  11  -2   13.40    2.20 
  -3  11  -2    9.90    2.70 
   3  11   2   15.10    2.50 
  -3  11  -2   13.00    2.30 
   3  11   2   11.50    2.40 
   4 -11   2    4.90    2.70 
   4 -11   2    3.10    0.80 
  -4 -11  -2    3.90    2.50 
  -4 -11  -2    2.50    2.50 
  -4 -11  -2    1.50    1.30 
  -4  11  -2    2.80    1.80 
  -4  11  -2    1.30    1.50 
   4  11   2    1.30    1.90 
  -4  11  -2    3.30    2.50 
   4  11   2    2.50    1.80 
   5 -11   2  176.08   14.60 
  -5 -11  -2  176.68   14.80 
  -5 -11  -2  181.98   13.60 
  -5 -11  -2  195.08   14.60 
  -5  11  -2  194.38   14.60 
   5  11   2  164.68   13.40 
  -5  11  -2  166.68   13.70 
   5  11   2  201.78   14.00 
   5  11   2  178.88   14.20 
  -5  11  -2  170.68   14.00 
   6 -11   2   12.90    1.70 
   6 -11   2   18.70    3.30 
   6 -11   2   14.80    1.70 
  -6 -11  -2   21.10    2.10 
  -6 -11  -2   16.00    3.40 
  -6 -11  -2   20.80    3.60 
   6  11   2   15.60    1.90 
  -6  11  -2   26.30    2.50 
   6  11   2   15.30    3.00 
  -6  11  -2   18.10    3.60 
   6  11   2   19.40    2.50 
  -6  11  -2   18.20    2.80 
  -7 -11  -2  257.87   18.10 
  -7 -11  -2  270.87   19.50 
   7 -11   2  213.38   18.00 
   7 -11   2  249.28   19.10 
  -7 -11  -2  276.37   19.20 
  -7  11  -2  232.58   18.70 
   7  11   2  245.78   18.90 
  -7  11  -2  268.67   19.20 
  -7  11  -2  203.38   18.00 
   8 -11   2   20.90    2.20 
  -8 -11  -2   19.10    3.40 
  -8 -11  -2   26.90    4.10 
  -8 -11  -2   19.60    2.40 
  -8 -11  -2   20.90    2.20 
   8 -11   2   20.90    3.60 
  -8  11  -2   16.50    3.40 
  -8  11  -2   20.40    3.20 
   8  11   2   19.30    3.40 
   9 -11   2   -0.60    2.50 
  -9 -11  -2   -0.80    1.10 
  -9 -11  -2    3.00    2.80 
  -9 -11  -2   -2.10    1.70 
  -9 -11  -2    1.10    2.60 
  -9 -11  -2    1.60    1.00 
  -9  11  -2    3.20    2.80 
   9  11   2    3.80    2.90 
  -9  11  -2   -0.50    2.30 
 -10 -11  -2   52.99    5.20 
 -10 -11  -2   58.29    6.30 
 -10 -11  -2   45.30    5.70 
 -10 -11  -2   51.29    4.10 
 -10 -11  -2   51.19    4.00 
  10 -11   2   49.40    5.60 
 -10  11  -2   43.90    4.70 
 -10  11  -2   42.30    5.20 
  10  11   2   49.70    5.80 
  11 -11   2    8.60    3.20 
  11 -11   2   14.20    3.30 
 -11 -11  -2   16.80    3.40 
 -11 -11  -2   14.40    2.70 
 -11 -11  -2   10.40    4.00 
 -11  11  -2   15.70    2.30 
  11  11   2   10.20    3.60 
 -11  11  -2    9.80    3.20 
  12 -11   2   10.10    3.10 
 -12 -11  -2    7.80    3.10 
  12 -11   2    8.50    3.30 
 -12 -11  -2    6.40    3.40 
 -12  11  -2    5.80    2.00 
 -12  11  -2    9.70    3.20 
  12  11   2    3.30    3.60 
 -13 -11  -2   64.29    7.30 
  13 -11   2   62.69    6.90 
 -13 -11  -2   53.49    6.00 
 -13 -11  -2   64.19    6.90 
 -13  11  -2   51.49    5.40 
 -13  11  -2   59.79    6.40 
  13  11   2   47.10    6.50 
  14 -11   2   15.60    3.60 
 -14 -11  -2   22.50    3.30 
 -14 -11  -2   20.10    3.90 
  14 -11   2   17.90    3.50 
 -14 -11  -2   19.50    4.00 
 -14  11  -2   17.30    2.80 
 -14  11  -2   14.40    3.70 
  14  11   2   18.70    4.40 
 -15 -11  -2   99.99   11.60 
  15 -11   2   95.89    8.60 
  15 -11   2   77.79    8.20 
 -15 -11  -2   92.99    8.10 
 -15 -11  -2   89.09    8.90 
 -15  11  -2   82.59    8.60 
  15  11   2   91.69    9.80 
 -15  11  -2   74.69    7.50 
 -15 -12   2   39.60    4.50 
 -15 -12   2   45.80    5.30 
 -15 -12   2   35.00    5.30 
 -15  12   2   36.90    4.50 
 -14 -12   2    4.30    3.30 
 -14 -12   2    0.00    3.00 
 -14 -12   2    1.00    2.30 
  14 -12  -2   -0.50    3.10 
  14 -12  -2    2.60    2.20 
 -14  12   2    0.50    3.30 
 -14  12   2    0.40    1.80 
 -13 -12   2   -0.20    2.10 
 -13 -12   2   -3.10    3.00 
  13 -12  -2   -1.80    3.10 
 -13 -12   2   -0.20    2.90 
  13 -12  -2    1.20    2.30 
 -13  12   2   -0.70    1.70 
 -13  12   2    2.00    3.20 
  13  12  -2    5.50    3.80 
 -12 -12   2   11.60    2.60 
 -12 -12   2   12.30    3.90 
  12 -12  -2    8.60    3.50 
 -12 -12   2   10.60    3.30 
  12 -12  -2   12.30    2.90 
 -12  12   2    8.60    3.50 
 -12  12   2   10.00    2.10 
  12  12  -2   13.60    4.10 
 -11 -12   2   13.10    3.60 
 -11 -12   2   14.10    2.50 
 -11 -12   2    8.40    1.40 
  11 -12  -2   12.60    3.50 
 -11 -12   2   12.30    3.20 
  11 -12  -2    8.70    2.80 
 -11  12   2   12.50    2.00 
  11  12  -2    5.90    3.50 
 -11  12   2   10.00    3.40 
  11  12  -2   12.90    1.90 
 -10 -12   2   23.70    3.90 
  10 -12  -2   27.10    4.20 
 -10 -12   2   26.40    3.20 
 -10 -12   2   25.50    4.30 
  10 -12  -2   27.80    3.80 
 -10 -12   2   24.20    2.40 
  10  12  -2   25.20    2.80 
 -10  12   2   20.60    2.60 
  10  12  -2   22.80    4.00 
 -10  12   2   24.70    4.00 
   9 -12  -2  147.69   13.20 
  -9 -12   2  181.48   13.20 
  -9 -12   2  170.08   12.10 
  -9 -12   2  162.28   13.50 
  -9 -12   2  156.88   12.20 
   9 -12  -2  168.18   13.00 
  -9  12   2  149.59   11.90 
  -9  12   2  140.29   11.80 
   9  12  -2  163.78   12.20 
   9  12  -2  155.98   13.10 
  -9  12   2  146.99   11.90 
  -9  12   2  148.79   12.90 
   8 -12  -2  278.47   22.20 
  -8 -12   2  286.87   21.40 
  -8 -12   2  293.57   21.30 
  -8 -12   2  299.07   22.30 
  -8 -12   2  286.87   22.70 
   8 -12  -2  284.77   22.40 
  -8  12   2  287.67   21.40 
   8  12  -2  282.47   22.10 
  -8  12   2  265.37   22.00 
   8  12  -2  292.47   21.60 
  -7 -12   2  445.96   33.00 
  -7 -12   2  464.45   32.70 
  -7 -12   2  481.45   31.80 
  -7 -12   2  407.56   31.70 
   7 -12  -2  404.86   31.60 
   7 -12  -2  414.06   32.60 
   7 -12  -2  423.36   32.60 
   7  12  -2  429.36   32.10 
   7  12  -2  402.86   32.30 
  -7  12   2  387.06   32.20 
  -7  12   2  462.15   32.00 
   6 -12  -2  594.94   43.00 
  -6 -12   2  596.24   43.30 
  -6 -12   2  612.54   43.00 
  -6 -12   2  615.84   42.20 
   6 -12  -2  561.34   42.00 
   6  12  -2  545.35   42.60 
   6  12  -2  593.44   42.50 
  -6  12   2  639.34   42.60 
   6  12  -2  516.35   41.90 
   6  12  -2  484.25   41.90 
  -6  12   2  551.54   42.60 
   5 -12  -2  862.81   64.69 
  -5 -12   2  926.51   65.79 
   5 -12  -2  888.71   65.69 
  -5 -12   2  884.81   65.79 
  -5 -12   2  932.11   64.89 
   5  12  -2  882.41   65.29 
   5  12  -2  807.12   65.39 
  -5  12   2  959.40   65.19 
  -5  12   2  794.52   65.29 
  -4 -12   2  572.34   44.30 
   4 -12  -2  605.24   44.20 
   4 -12  -2  585.74   43.30 
  -4  12   2  576.94   44.60 
   4  12  -2  555.14   43.70 
  -4  12   2  636.04   43.80 
  -4  12   2  581.34   43.70 
   4  12  -2  590.74   43.90 
   3 -12  -2  485.35   35.90 
  -3 -12   2  486.25   35.10 
  -3 -12   2  451.95   35.90 
   3 -12  -2  477.25   35.00 
  -3 -12   2  479.65   36.00 
   3 -12  -2  425.26   35.20 
  -3  12   2  472.55   35.70 
  -3  12   2  484.95   35.40 
  -3  12   2  539.05   35.50 
   3  12  -2  461.85   35.30 
   3  12  -2  447.16   35.60 
   3  12  -2  476.15   35.60 
   2 -12  -2  366.96   27.30 
  -2 -12   2  351.46   27.40 
  -2 -12   2  334.77   27.20 
   2 -12  -2  325.37   26.70 
   2 -12  -2  359.66   26.40 
  -2 -12   2  363.56   26.40 
  -2  12   2  359.46   27.00 
  -2  12   2  371.96   26.70 
  -2  12   2  370.46   27.20 
   2  12  -2  360.96   26.60 
   2  12  -2  343.67   27.00 
   2  12  -2  352.96   26.90 
   1 -12  -2  427.66   34.00 
  -1 -12   2  439.66   34.30 
  -1 -12   2  458.35   34.60 
   1 -12  -2  466.95   33.70 
   1 -12  -2  449.16   34.50 
  -1 -12   2  470.85   33.70 
   1  12  -2  431.36   34.10 
  -1  12   2  463.95   33.90 
  -1  12   2  480.85   34.20 
   1  12  -2  454.25   34.30 
  -1  12   2  446.16   34.20 
   1  12  -2  463.75   33.90 
   0 -12   2    0.40    2.70 
   0 -12   2    5.30    1.50 
   0 -12  -2    3.70    2.70 
   0 -12  -2    5.00    1.60 
   0 -12  -2    4.40    2.00 
   0 -12   2    3.10    2.10 
   0  12   2    5.60    2.00 
   0  12  -2    3.70    1.80 
   0  12   2    3.80    2.00 
   0  12  -2    7.40    1.90 
   0  12   2    9.50    2.40 
   0  12  -2    9.10    2.60 
  -1 -12  -2   11.40    1.80 
  -1 -12  -2   10.90    2.60 
  -1 -12  -2   12.20    2.90 
   1 -12   2    8.50    1.60 
   1 -12   2    6.10    2.90 
   1 -12   2   10.30    2.20 
   1  12   2   11.70    2.50 
  -1  12  -2    8.90    2.20 
  -1  12  -2    9.90    2.20 
   1  12   2    9.30    2.20 
  -1  12  -2   14.50    3.00 
   1  12   2   10.10    2.60 
  -2 -12  -2  165.38   13.80 
   2 -12   2  155.88   13.20 
   2 -12   2  166.68   12.90 
   2 -12   2  165.28   14.20 
  -2 -12  -2  172.08   13.00 
  -2 -12  -2  174.88   14.00 
  -2  12  -2  171.08   13.90 
   2  12   2  168.28   13.40 
  -2  12  -2  170.58   13.40 
   2  12   2  176.38   13.80 
  -2  12  -2  180.78   13.40 
   2  12   2  183.48   13.60 
   3 -12   2    2.40    1.10 
  -3 -12  -2    3.40    1.60 
   3 -12   2    1.70    2.60 
  -3 -12  -2    3.20    2.30 
  -3 -12  -2    2.30    2.50 
  -3  12  -2    1.10    1.60 
   3  12   2    3.20    2.00 
  -3  12  -2    2.90    2.50 
  -3  12  -2    0.70    1.80 
   3  12   2    2.80    2.00 
   4 -12   2   49.00    4.20 
  -4 -12  -2   52.99    5.20 
  -4 -12  -2   53.49    6.10 
   4 -12   2   45.70    5.60 
  -4  12  -2   56.49    5.00 
  -4  12  -2   55.89    6.40 
  -4  12  -2   45.60    5.20 
   4  12   2   52.89    5.20 
  -5 -12  -2    4.60    2.70 
  -5 -12  -2    0.60    1.40 
   5 -12   2    2.00    2.70 
  -5 -12  -2   -0.30    2.50 
   5 -12   2   -0.10    0.70 
  -5  12  -2    1.70    2.50 
  -5  12  -2   -0.30    1.90 
  -5  12  -2    5.40    1.60 
   5  12   2    1.00    1.80 
   5  12   2    0.00    2.10 
  -6 -12  -2  129.99    9.90 
  -6 -12  -2  120.29    8.60 
   6 -12   2  106.59   10.00 
  -6 -12  -2  107.99   10.10 
   6  12   2   99.29    9.50 
  -6  12  -2  112.29    9.90
[truncated: 3,507,378 more chars]
