# Supplementary material for: Crystallization Pathways of FABr-PbBr2-DMF and FABr-PbBr2-DMSO Systems: The Comprehensive Picture of Formamidinium-Based Low-Dimensional Perovskite-Related Phases and Intermediate Solvates
Source: Int J Mol Sci. 2022 Dec 5;23(23):15344. doi: 10.3390/ijms232315344 (PMC9739158; doi:10.3390/ijms232315344)
Supplement: Supplementary file 1 [file ijms-23-15344-s001.zip › FA3PbBr5.cif]

 
data_FA3PbBr5 
  
_audit_creation_method            SHELXL-2013 
_chemical_name_systematic 
; 
 ? 
; 
_chemical_name_common             ? 
_chemical_melting_point           ? 
_chemical_formula_moiety          
 '3(C H5 N2), Br5 Pb'
_chemical_formula_sum 
 'C3 H15 Br5 N6 Pb' 
_chemical_formula_weight          741.91 
  
loop_ 
 _atom_type_symbol 
 _atom_type_description 
 _atom_type_scat_dispersion_real 
 _atom_type_scat_dispersion_imag 
 _atom_type_scat_source 
 'C'  'C'   0.0033   0.0016 
 'International Tables Vol C Tables 4.2.6.8 and 6.1.1.4' 
 'H'  'H'   0.0000   0.0000 
 'International Tables Vol C Tables 4.2.6.8 and 6.1.1.4' 
 'N'  'N'   0.0061   0.0033 
 'International Tables Vol C Tables 4.2.6.8 and 6.1.1.4' 
 'Br'  'Br'  -0.2901   2.4595 
 'International Tables Vol C Tables 4.2.6.8 and 6.1.1.4' 
 'Pb'  'Pb'  -3.3944  10.1111 
 'International Tables Vol C Tables 4.2.6.8 and 6.1.1.4' 
  
_space_group_crystal_system       monoclinic 
_space_group_IT_number            15 
_space_group_name_H-M_alt         'C 2/c' 
_space_group_name_Hall            '-C 2yc' 
  
_shelx_space_group_comment 
; 
The symmetry employed for this shelxl refinement is uniquely defined 
by the following loop, which should always be used as a source of 
symmetry information in preference to the above space-group names. 
They are only intended as comments. 
; 
  
loop_ 
 _space_group_symop_operation_xyz 
 'x, y, z' 
 '-x, y, -z+1/2' 
 'x+1/2, y+1/2, z' 
 '-x+1/2, y+1/2, -z+1/2' 
 '-x, -y, -z' 
 'x, -y, z-1/2' 
 '-x+1/2, -y+1/2, -z' 
 'x+1/2, -y+1/2, z-1/2' 
  
_cell_length_a                    12.466(3) 
_cell_length_b                    11.465(2) 
_cell_length_c                    11.868(3) 
_cell_angle_alpha                 90 
_cell_angle_beta                  99.029(6) 
_cell_angle_gamma                 90 
_cell_volume                      1675.2(7) 
_cell_formula_units_Z             4 
_cell_measurement_temperature     100(2) 
_cell_measurement_reflns_used     2966 
_cell_measurement_theta_min       2.43 
_cell_measurement_theta_max       30.49 
  
_exptl_crystal_description        plate 
_exptl_crystal_colour             colourless 
_exptl_crystal_density_meas       ? 
_exptl_crystal_density_method     ? 
_exptl_crystal_density_diffrn     2.942 
_exptl_crystal_F_000              1328 
_exptl_transmission_factor_min    ? 
_exptl_transmission_factor_max    ? 
_exptl_crystal_size_max           0.12 
_exptl_crystal_size_mid           0.12 
_exptl_crystal_size_min           0.01 
_exptl_absorpt_coefficient_mu     21.982 
_shelx_estimated_absorpt_T_min    0.178 
_shelx_estimated_absorpt_T_max    0.810 
_exptl_absorpt_correction_type    'multi-scan' 
_exptl_absorpt_correction_T_min   0.077
_exptl_absorpt_correction_T_max   0.777
_exptl_absorpt_process_details 
; 
 SADABS 2016/2: Krause, L., Herbst-Irmer, R., Sheldrick G.M. & Stalke D., 
 J. Appl. Cryst. 48 (2015) 3-10. 
; 
  
_exptl_special_details 
; 
 ? 
; 
  
_diffrn_ambient_temperature       100(2) 
_diffrn_radiation_wavelength      0.71073 
_diffrn_radiation_type            MoK\a 
_diffrn_source                    ? 
_diffrn_measurement_device_type   'Bruker D8 QUEST PHOTON-III CCD'
_diffrn_measurement_method        '\f and \w scans' 
_diffrn_detector_area_resol_mean  ? 
_diffrn_reflns_number             12281 
_diffrn_reflns_av_unetI/netI      0.0668 
_diffrn_reflns_av_R_equivalents   0.0753 
_diffrn_reflns_limit_h_min        -18 
_diffrn_reflns_limit_h_max        18 
_diffrn_reflns_limit_k_min        -16 
_diffrn_reflns_limit_k_max        17 
_diffrn_reflns_limit_l_min        -17 
_diffrn_reflns_limit_l_max        17 
_diffrn_reflns_theta_min          2.427 
_diffrn_reflns_theta_max          32.681 
_diffrn_reflns_theta_full         25.242 
_diffrn_measured_fraction_theta_max   0.989 
_diffrn_measured_fraction_theta_full  0.986 
_diffrn_reflns_Laue_measured_fraction_max    0.989 
_diffrn_reflns_Laue_measured_fraction_full   0.986 
_diffrn_reflns_point_group_measured_fraction_max   0.989 
_diffrn_reflns_point_group_measured_fraction_full  0.986 
_reflns_number_total              3040 
_reflns_number_gt                 2034 
_reflns_threshold_expression      'I > 2\s(I)' 
_reflns_Friedel_coverage          0.000 
_reflns_Friedel_fraction_max      . 
_reflns_Friedel_fraction_full     . 
  
_reflns_special_details 
; 
 Reflections were merged by SHELXL according to the crystal 
 class for the calculation of statistics and refinement. 
  
 _reflns_Friedel_fraction is defined as the number of unique 
 Friedel pairs measured divided by the number that would be 
 possible theoretically, ignoring centric projections and 
 systematic absences. 
; 
  
_computing_data_collection        'APEX3 (Bruker, 2018)'     
_computing_cell_refinement        'SAINT (Bruker, 2013)'     
_computing_data_reduction         'SAINT (Bruker, 2013)'     
_computing_structure_solution     'SHELXT (Sheldrick, 2015)' 
_computing_structure_refinement   'SHELXL (Sheldrick, 2015)'  
_computing_molecular_graphics     'SHELXTL (Sheldrick, 2015)'
_computing_publication_material   'SHELXTL (Sheldrick, 2015)'
  
_refine_special_details 
; 
 ? 
; 
_refine_ls_structure_factor_coef  Fsqd 
_refine_ls_matrix_type            full 
_refine_ls_weighting_scheme       calc 
_refine_ls_weighting_details 
'w=1/[\s^2^(Fo^2^)+(0.0806P)^2^+1.36P] where P=(Fo^2^+2Fc^2^)/3' 
_atom_sites_solution_primary      difmap 
_atom_sites_solution_secondary    difmap 
_atom_sites_solution_hydrogens    mixed 
_refine_ls_hydrogen_treatment     constr 
_refine_ls_extinction_method      SHELXL 
_refine_ls_extinction_coef        0.00023(2) 
_refine_ls_extinction_expression 
 'Fc^*^=kFc[1+0.001xFc^2^\l^3^/sin(2\q)]^-1/4^' 
_refine_ls_number_reflns          3040 
_refine_ls_number_parameters      72 
_refine_ls_number_restraints      41 
_refine_ls_R_factor_all           0.0931 
_refine_ls_R_factor_gt            0.0571 
_refine_ls_wR_factor_ref          0.1553 
_refine_ls_wR_factor_gt           0.1347 
_refine_ls_goodness_of_fit_ref    1.013 
_refine_ls_restrained_S_all       1.009 
_refine_ls_shift/su_max           0.000 
_refine_ls_shift/su_mean          0.000 
  
loop_ 
 _atom_site_label 
 _atom_site_type_symbol 
 _atom_site_fract_x 
 _atom_site_fract_y 
 _atom_site_fract_z 
 _atom_site_U_iso_or_equiv 
 _atom_site_adp_type 
 _atom_site_occupancy 
 _atom_site_site_symmetry_order 
 _atom_site_calc_flag 
 _atom_site_refinement_flags_posn 
 _atom_site_refinement_flags_adp 
 _atom_site_refinement_flags_occupancy 
 _atom_site_disorder_assembly 
 _atom_site_disorder_group 
Pb1 Pb 0.0000 0.5000 0.5000 0.02790(15) Uani 1 2 d S . P . . 
Br1 Br 0.0000 0.46065(13) 0.2500 0.0328(3) Uani 1 2 d S T P . . 
Br2 Br 0.24103(8) 0.49239(8) 0.54483(8) 0.0344(2) Uani 1 1 d . . . . . 
Br3 Br -0.00392(9) 0.24079(9) 0.52361(10) 0.0391(3) Uani 1 1 d . . . . . 
N1 N 0.4921(10) 0.4972(9) 0.5647(5) 0.0157(13) Uani 0.5 1 d D U P A 1 
H1B H 0.4832 0.5709 0.5389 0.019 Uiso 0.5 1 d R U P A 1 
H1C H 0.4936 0.4380 0.5151 0.019 Uiso 0.5 1 d R U P A 1 
N2 N 0.5000 0.5580(10) 0.7500 0.0157(13) Uani 0.5 2 d DS TU P . . 
H2B H 0.4914 0.6333 0.7293 0.019 Uiso 0.125 1 d R U P B 1 
H2C H 0.5078 0.5381 0.8242 0.019 Uiso 0.125 1 d R U P B 1 
H2D H 0.4856 0.5596 0.8219 0.019 Uiso 0.125 1 d R U P C 2 
H2E H 0.5075 0.6251 0.7127 0.019 Uiso 0.125 1 d R U P C 2 
C1 C 0.504(3) 0.4770(9) 0.6740(7) 0.0157(13) Uani 0.25 1 d D U P A 1 
H1 H 0.5135 0.3974 0.6987 0.019 Uiso 0.25 1 d R U P A 1 
N1A N 0.5000 0.3574(12) 0.7500 0.0157(13) Uani 0.5 2 d DS TU P A 2 
H1D H 0.4856 0.3558 0.8219 0.019 Uiso 0.25 1 d R U P A 2 
H1E H 0.5075 0.2902 0.7128 0.019 Uiso 0.25 1 d R U P A 2 
C1A C 0.506(3) 0.4576(9) 0.7003(15) 0.0157(13) Uani 0.25 1 d D U P A 2 
H1A H 0.5213 0.4576 0.6235 0.019 Uiso 0.25 1 d R U P A 2 
N3 N 0.2551(18) 0.7964(14) 0.1654(13) 0.0405(18) Uani 0.5 1 d D . P D 1 
H3A H 0.2108 0.7595 0.1120 0.049 Uiso 0.5 1 calc R U P D 1 
H3B H 0.2903 0.8587 0.1479 0.049 Uiso 0.5 1 calc R U P D 1 
N4 N 0.2200(15) 0.6677(13) 0.3036(13) 0.0405(18) Uani 0.5 1 d D . P D 1 
H4A H 0.1748 0.6271 0.2542 0.049 Uiso 0.5 1 calc R U P D 1 
H4B H 0.2325 0.6466 0.3758 0.049 Uiso 0.5 1 calc R U P D 1 
C2 C 0.2685(15) 0.7588(13) 0.2700(11) 0.0405(18) Uani 0.5 1 d D . P D 1 
H2 H 0.3169 0.8007 0.3255 0.049 Uiso 0.5 1 calc R U P D 1 
N3A N 0.2409(17) 0.8127(13) 0.1924(12) 0.0405(18) Uani 0.5 1 d D . P E 2 
H3C H 0.3026 0.8493 0.2150 0.049 Uiso 0.5 1 d R U P E 2 
H3D H 0.2026 0.8288 0.1254 0.049 Uiso 0.5 1 d R U P E 2 
N4A N 0.2617(15) 0.6997(14) 0.3545(11) 0.0405(18) Uani 0.5 1 d D . P E 2 
H4C H 0.3239 0.7330 0.3823 0.049 Uiso 0.5 1 d R U P E 2 
H4D H 0.2338 0.6463 0.3945 0.049 Uiso 0.5 1 d R U P E 2 
C2A C 0.2108(14) 0.7291(14) 0.2545(12) 0.0405(18) Uani 0.5 1 d D . P E 2 
H2A H 0.1472 0.6866 0.2248 0.049 Uiso 0.5 1 calc R U P E 2 
  
loop_ 
 _atom_site_aniso_label 
 _atom_site_aniso_U_11 
 _atom_site_aniso_U_22 
 _atom_site_aniso_U_33 
 _atom_site_aniso_U_23 
 _atom_site_aniso_U_13 
 _atom_site_aniso_U_12 
Pb1 0.0332(2) 0.0338(2) 0.0165(2) 0.00031(16) 0.00334(15) -0.00184(18) 
Br1 0.0362(7) 0.0456(7) 0.0169(5) 0.000 0.0052(5) 0.000 
Br2 0.0369(5) 0.0368(5) 0.0278(5) -0.0002(3) -0.0003(4) -0.0048(4) 
Br3 0.0438(5) 0.0340(5) 0.0388(5) 0.0059(4) 0.0043(4) 0.0001(4) 
N1 0.023(3) 0.021(3) 0.004(2) 0.000(3) 0.003(2) 0.001(3) 
N2 0.023(3) 0.021(3) 0.004(2) 0.000(3) 0.003(2) 0.001(3) 
C1 0.023(3) 0.021(3) 0.004(2) 0.000(3) 0.003(2) 0.001(3) 
N1A 0.023(3) 0.021(3) 0.004(2) 0.000(3) 0.003(2) 0.001(3) 
C1A 0.023(3) 0.021(3) 0.004(2) 0.000(3) 0.003(2) 0.001(3) 
N3 0.055(5) 0.039(4) 0.028(4) 0.000(3) 0.009(4) -0.008(3) 
N4 0.055(5) 0.039(4) 0.028(4) 0.000(3) 0.009(4) -0.008(3) 
C2 0.055(5) 0.039(4) 0.028(4) 0.000(3) 0.009(4) -0.008(3) 
N3A 0.055(5) 0.039(4) 0.028(4) 0.000(3) 0.009(4) -0.008(3) 
N4A 0.055(5) 0.039(4) 0.028(4) 0.000(3) 0.009(4) -0.008(3) 
C2A 0.055(5) 0.039(4) 0.028(4) 0.000(3) 0.009(4) -0.008(3) 
  
_geom_special_details 
; 
 All esds (except the esd in the dihedral angle between two l.s. planes) 
 are estimated using the full covariance matrix.  The cell esds are taken 
 into account individually in the estimation of esds in distances, angles 
 and torsion angles; correlations between esds in cell parameters are only 
 used when they are defined by crystal symmetry.  An approximate (isotropic) 
 treatment of cell esds is used for estimating esds involving l.s. planes. 
; 
  
loop_ 
 _geom_bond_atom_site_label_1 
 _geom_bond_atom_site_label_2 
 _geom_bond_distance 
 _geom_bond_site_symmetry_2 
 _geom_bond_publ_flag 
Pb1 Br2 2.9692(12) 5_566 ? 
Pb1 Br2 2.9693(12) . ? 
Pb1 Br3 2.9862(12) 5_566 ? 
Pb1 Br3 2.9862(12) . ? 
Pb1 Br1 3.0010(7) 5_566 ? 
Pb1 Br1 3.0010(7) . ? 
N1 C1 1.303(3) . ? 
N1 H1B 0.8999 . ? 
N1 H1C 0.9002 . ? 
N2 C1A 1.300(3) . ? 
N2 C1 1.301(3) . ? 
N2 H2B 0.9001 . ? 
N2 H2C 0.9000 . ? 
N2 H2D 0.9000 . ? 
N2 H2E 0.8999 . ? 
C1 H1 0.9600 . ? 
N1A C1A 1.299(3) . ? 
N1A H1D 0.9000 . ? 
N1A H1E 0.8999 . ? 
C1A H1A 0.9601 . ? 
N3 C2 1.300(3) . ? 
N3 H3A 0.8800 . ? 
N3 H3B 0.8800 . ? 
N4 C2 1.301(3) . ? 
N4 H4A 0.8800 . ? 
N4 H4B 0.8800 . ? 
C2 H2 0.9500 . ? 
N3A C2A 1.300(3) . ? 
N3A H3C 0.8801 . ? 
N3A H3D 0.8801 . ? 
N4A C2A 1.300(3) . ? 
N4A H4C 0.8800 . ? 
N4A H4D 0.8799 . ? 
C2A H2A 0.9500 . ? 
  
loop_ 
 _geom_angle_atom_site_label_1 
 _geom_angle_atom_site_label_2 
 _geom_angle_atom_site_label_3 
 _geom_angle 
 _geom_angle_site_symmetry_1 
 _geom_angle_site_symmetry_3 
 _geom_angle_publ_flag 
Br2 Pb1 Br3 90.86(3) . 5_566 ? 
Br2 Pb1 Br3 90.86(3) 5_566 . ? 
Br2 Pb1 Br3 89.14(3) . . ? 
Br2 Pb1 Br1 89.10(2) . 5_566 ? 
Br3 Pb1 Br1 93.11(4) . 5_566 ? 
Br2 Pb1 Br1 89.10(2) 5_566 . ? 
Br2 Pb1 Br1 90.90(2) . . ? 
Br3 Pb1 Br1 93.11(4) 5_566 . ? 
Br3 Pb1 Br1 86.89(4) . . ? 
C1 N1 H1B 119.6 . . ? 
C1 N1 H1C 120.4 . . ? 
H1B N1 H1C 120.0 . . ? 
C1 N2 H2B 120.8 . . ? 
C1 N2 H2C 119.2 . . ? 
H2B N2 H2C 120.0 . . ? 
C1A N2 H2D 118.9 . . ? 
C1A N2 H2E 121.1 . . ? 
H2D N2 H2E 120.0 . . ? 
N2 C1 N1 123.6(4) . . ? 
N2 C1 H1 118.8 . . ? 
N1 C1 H1 117.6 . . ? 
C1A N1A H1D 118.9 . . ? 
C1A N1A H1E 121.1 . . ? 
H1D N1A H1E 120.0 . . ? 
N1A C1A N2 124.4(16) . . ? 
N1A C1A H1A 117.7 . . ? 
N2 C1A H1A 117.7 . . ? 
C2 N3 H3A 120.0 . . ? 
C2 N3 H3B 120.0 . . ? 
H3A N3 H3B 120.0 . . ? 
C2 N4 H4A 120.0 . . ? 
C2 N4 H4B 120.0 . . ? 
H4A N4 H4B 120.0 . . ? 
N3 C2 N4 124.2(5) . . ? 
N3 C2 H2 117.9 . . ? 
N4 C2 H2 117.9 . . ? 
C2A N3A H3C 119.6 . . ? 
C2A N3A H3D 120.2 . . ? 
H3C N3A H3D 120.0 . . ? 
C2A N4A H4C 120.3 . . ? 
C2A N4A H4D 119.7 . . ? 
H4C N4A H4D 120.0 . . ? 
N4A C2A N3A 124.5(5) . . ? 
N4A C2A H2A 117.8 . . ? 
N3A C2A H2A 117.8 . . ? 
  
loop_ 
 _geom_hbond_atom_site_label_D 
 _geom_hbond_atom_site_label_H 
 _geom_hbond_atom_site_label_A 
 _geom_hbond_distance_DH 
 _geom_hbond_distance_HA 
 _geom_hbond_distance_DA 
 _geom_hbond_angle_DHA 
 _geom_hbond_site_symmetry_A 
N1  H1B Br3 0.90 1.96 2.837(11) 163 3 
N1  H1C Br3 0.90 2.11 2.935(9)  152 7_556 
N2  H2E Br3 0.90 2.59 3.402(7)  150 3 
N2  H2D Br3 0.90 2.76 3.402(7)  130 4_556 
N2  H2C N1  0.90 1.40 2.295(3)  172 2_656 
N2  H2D Br3 0.90 2.76 3.402(7)  130 4_556 
N2  H2E Br3 0.90 2.59 3.402(7)  150 3 
N3  H3A Br2 0.88 3.03 3.600(18) 124 6_565 
N3  H3A Br3 0.88 2.72 3.43(2)   138 6_565 
N3  H3B Br1 0.88 2.95 3.59(2)   132 3 
N3  H3B Br2 0.88 2.73 3.364(12) 130 4 
N4  H4A Br1 0.88 2.89 3.607(15) 140 . 
N4  H4A Br2 0.88 3.06 3.623(17) 123 6_565 
N4  H4B Br2 0.88 2.66 3.473(12) 154 . 
N4A H4D Br2 0.88 2.50 3.317(12) 155 . 
  
_refine_diff_density_max    3.010 
_refine_diff_density_min   -2.164 
_refine_diff_density_rms    0.350 
  
_shelxl_version_number 2013-4 
  
_shelx_res_file 
; 
TITL FA3PbBr5 in C2/c 
CELL  0.71073  12.4658  11.4653  11.8676   90.000   99.029   90.000 
ZERR    4.000   0.0026   0.0023   0.0025    0.000    0.006    0.000 
LATT  7 
SYMM -X, Y, 1/2-Z 
SFAC C H N BR PB 
UNIT 12 60 24 20 4 
TEMP -173.0 
SIZE 0.01 0.12 0.12 
  
OMIT    -3   1   2 
OMIT     2   2   0 
OMIT     1   1   2 
OMIT     5   1   1 
OMIT    -3   1   1 
OMIT     5   1   3 
OMIT    -6   4   5 
OMIT     5   5   3 
OMIT     9   1   1 
OMIT    -2   0   2 
OMIT     9   5   3 
OMIT     1   1   1 
OMIT    -3   5   1 
OMIT     0   2   7 
OMIT    -8   2   1 
OMIT     2   2   4 
OMIT     3   1  15 
OMIT     2   6   3 
OMIT    -9  11  10 
OMIT    -6   6   2 
OMIT     6   6   3 
OMIT     3   5   3 
L.S. 12 
BOND $H 
ACTA 
CONF 
EQIV $1 x+1/2, y+1/2, z 
HTAB N1 Br3_$1 
EQIV $2 -x+1/2, -y+1/2, -z+1 
HTAB N1 Br3_$2 
HTAB N2 Br3_$1 
EQIV $3 -x+1/2, y+1/2, -z+3/2 
HTAB N2 Br3_$3 
EQIV $4 -x+1, y, -z+3/2 
HTAB N2 N1_$4 
HTAB N2 Br3_$3 
HTAB N2 Br3_$1 
EQIV $5 x, -y+1, z-1/2 
HTAB N3 Br2_$5 
HTAB N3 Br3_$5 
HTAB N3 Br1_$1 
EQIV $6 -x+1/2, y+1/2, -z+1/2 
HTAB N3 Br2_$6 
HTAB N4 Br1 
HTAB N4 Br2_$5 
HTAB N4 Br2 
HTAB N4A Br2 
  
DFIX 1.300 0.003 C1 N1 C1 N2 
DFIX 1.300 0.003 C1A N1A C1A N2 
DFIX 1.300 0.003 C2 N3 C2 N4 C2A N3A C2A N4A 
DFIX 2.300 0.003 N1 N2 
DFIX 2.300 0.003 N3 N4 N3A N4A 
ISOR 0.01 0.02 N1 N2 N1A C1 C1A 
EADP N1 N2 N1A C1 C1A 
EADP N3 N4 C2 N3A N4A C2A 
  
WGHT    0.080600    1.360000 
EXTI    0.000235 
FVAR       0.10037 
PB1   5    0.000000    0.500000    0.500000    10.50000    0.03322    0.03377 = 
         0.01653    0.00031    0.00334   -0.00184 
BR1   4    0.000000    0.460651    0.250000    10.50000    0.03617    0.04556 = 
         0.01692    0.00000    0.00521    0.00000 
BR2   4    0.241026    0.492395    0.544828    11.00000    0.03693    0.03680 = 
         0.02779   -0.00020   -0.00034   -0.00479 
BR3   4   -0.003919    0.240787    0.523609    11.00000    0.04383    0.03396 = 
         0.03879    0.00586    0.00433    0.00012 
PART   1 
N1    3    0.492087    0.497189    0.564663    10.50000    0.02271    0.02094 = 
         0.00375    0.00036    0.00276    0.00101 
AFIX   3 
H1B   2    0.483237    0.570939    0.538923    10.50000   -1.20000 
H1C   2    0.493567    0.438039    0.515053    10.50000   -1.20000 
AFIX   0 
PART   0 
N2    3    0.500000    0.557962    0.750000    10.25000    0.02271    0.02094 = 
         0.00375    0.00036    0.00276    0.00101 
AFIX   3 
PART   1 
H2B   2    0.491400    0.633322    0.729290    10.12500   -1.20000 
H2C   2    0.507770    0.538082    0.824200    10.12500   -1.20000 
PART   2 
AFIX   3 
H2D   2    0.485580    0.559582    0.821950    10.12500   -1.20000 
H2E   2    0.507470    0.625112    0.712740    10.12500   -1.20000 
AFIX   0 
PART   1 
C1    1    0.504254    0.477011    0.673962    10.25000    0.02271    0.02094 = 
         0.00375    0.00036    0.00276    0.00101 
AFIX   3 
H1    2    0.513544    0.397431    0.698742    10.25000   -1.20000 
AFIX   0 
PART   2 
N1A   3    0.500000    0.357368    0.750000    10.25000    0.02271    0.02094 = 
         0.00375    0.00036    0.00276    0.00101 
AFIX   3 
H1D   2    0.485580    0.355788    0.821950    10.25000   -1.20000 
H1E   2    0.507460    0.290198    0.712770    10.25000   -1.20000 
AFIX   0 
C1A   1    0.505966    0.457618    0.700320    10.25000    0.02271    0.02094 = 
         0.00375    0.00036    0.00276    0.00101 
AFIX   3 
H1A   2    0.521346    0.457608    0.623540    10.25000   -1.20000 
AFIX   0 
PART   1 
N3    3    0.255094    0.796367    0.165356    10.50000    0.05530    0.03890 = 
         0.02801    0.00030    0.00907   -0.00772 
AFIX  93 
H3A   2    0.210836    0.759460    0.112026    10.50000   -1.20000 
H3B   2    0.290267    0.858680    0.147855    10.50000   -1.20000 
AFIX   0 
N4    3    0.220010    0.667670    0.303641    10.50000    0.05530    0.03890 = 
         0.02801    0.00030    0.00907   -0.00772 
AFIX  93 
H4A   2    0.174761    0.627124    0.254222    10.50000   -1.20000 
H4B   2    0.232455    0.646563    0.375806    10.50000   -1.20000 
AFIX   0 
C2    1    0.268514    0.758831    0.270007    10.50000    0.05530    0.03890 = 
         0.02801    0.00030    0.00907   -0.00772 
AFIX  43 
H2    2    0.316860    0.800667    0.325506    10.50000   -1.20000 
AFIX   0 
PART   2 
N3A   3    0.240900    0.812678    0.192368    10.50000    0.05530    0.03890 = 
         0.02801    0.00030    0.00907   -0.00772 
AFIX   3 
H3C   2    0.302580    0.849258    0.215038    10.50000   -1.20000 
H3D   2    0.202640    0.828818    0.125388    10.50000   -1.20000 
AFIX   0 
N4A   3    0.261706    0.699738    0.354517    10.50000    0.05530    0.03890 = 
         0.02801    0.00030    0.00907   -0.00772 
AFIX   3 
H4C   2    0.323866    0.733028    0.382267    10.50000   -1.20000 
H4D   2    0.233786    0.646288    0.394537    10.50000   -1.20000 
AFIX   0 
C2A   1    0.210766    0.729101    0.254504    10.50000    0.05530    0.03890 = 
         0.02801    0.00030    0.00907   -0.00772 
AFIX  43 
H2A   2    0.147178    0.686598    0.224774    10.50000   -1.20000 
PART   0 
  
AFIX   0 
HKLF 4 
  
REM  FA3PbBr5 in C2/c 
REM R1 =  0.0571 for    2034 Fo > 4sig(Fo)  and  0.0931 for all    3040 data 
REM     72 parameters refined using     41 restraints 
  
END 
  
WGHT      0.0806      1.3403 
  
REM Highest difference peak  3.010,  deepest hole -2.164,  1-sigma level  0.350 
Q1    1   0.5015  0.5226  0.5706  11.00000  0.05    3.01 
Q2    1  -0.0063  0.5050  0.1537  11.00000  0.05    2.40 
Q3    1   0.2786  0.4999  0.3822  11.00000  0.05    2.24 
Q4    1   0.5412  0.5559  0.7598  11.00000  0.05    2.18 
Q5    1   0.0008  0.2490  0.5952  11.00000  0.05    2.13 
Q6    1   0.5116  0.3580  0.7848  11.00000  0.05    1.78 
Q7    1  -0.0411  0.5467  0.4911  11.00000  0.05    1.77 
Q8    1   0.0025  0.2459  0.4510  11.00000  0.05    1.76 
Q9    1  -0.0444  0.4572  0.4922  11.00000  0.05    1.75 
Q10   1   0.5287  0.3713  0.7547  11.00000  0.05    1.52 
Q11   1   0.1809  0.4388  0.5476  11.00000  0.05    1.28 
Q12   1   0.0410  0.4949  0.2561  11.00000  0.05    1.21 
Q13   1   0.0000  0.5357  0.2500  10.50000  0.05    1.20 
Q14   1   0.2297  0.6723  0.0239  11.00000  0.05    1.03 
Q15   1   0.0000  0.3657  0.2500  10.50000  0.05    1.02 
Q16   1   0.2567  0.5051  0.2309  11.00000  0.05    0.98 
Q17   1   0.2445  0.5730  0.2466  11.00000  0.05    0.94 
Q18   1   0.2875  0.5380  0.5270  11.00000  0.05    0.93 
Q19   1   0.2844  0.4588  0.5348  11.00000  0.05    0.93 
Q20   1   0.2467  0.6321  0.3176  11.00000  0.05    0.93 
; 
_shelx_res_checksum   16285 
  
_shelx_hkl_file 
; 
   2   0   0 1502.75   90.69 
  -2   0   0 1531.35   90.69 
  -2   0   0 1554.34   90.99 
  -2   0   0 1423.06   90.59 
  -2   0   0 1452.65   90.39 
  -4   0   0 9031.00  549.74 
   4   0   0 9999.00  550.04 
  -4   0   0 8630.84  549.05 
  -4   0   0 9739.83  549.74 
  -4   0   0 8657.43  549.65 
  -4   0   0 8597.04  549.25 
   6   0   0 1099.89   64.99 
  -6   0   0  999.10   63.99 
  -6   0   0  993.10   63.99 
   8   0   0 3109.39  184.48 
  -8   0   0 2988.90  183.48 
  -8   0   0 2922.81  183.28 
 -10   0   0  447.86   31.50 
 -10   0   0  424.46   30.20 
  10   0   0  446.16   32.40 
 -12   0   0  778.52   50.39 
 -12   0   0  795.12   51.09 
  12   0   0  735.93   52.19 
 -14   0   0  129.89   14.90 
 -14   0   0  135.59   17.50 
  14   0   0  122.69   16.10 
 -16   0   0  147.29   18.30 
 -16   0   0  156.68   20.10 
  16   0   0  134.89   17.10 
 -18   0   0   43.60    9.30 
  18   0   0   26.50   14.30 
  -1  -1   0  944.71   60.59 
  -1  -1   0 1112.09   60.99 
   1   1   0  953.00   60.69 
   3  -1   0  670.43   37.30 
   3  -1   0  587.94   36.80 
  -3  -1   0  563.34   36.90 
  -3  -1   0  619.54   37.20 
  -3  -1   0  565.34   36.60 
   3  -1   0  530.15   37.00 
   3   1   0  572.54   36.60 
   3   1   0  634.54   37.10 
  -3   1   0  571.64   36.90 
   3   1   0  623.64   37.20 
  -3   1   0  588.94   36.80 
  -3   1   0  582.04   37.30 
   5  -1   0  980.10   58.99 
  -5  -1   0  851.11   58.09 
  -5  -1   0  943.41   58.69 
   5  -1   0  948.21   58.29 
   5   1   0 1005.60   58.89 
  -5   1   0  883.81   58.59 
   5   1   0  959.50   58.79 
  -7  -1   0  234.48   18.10 
  -7  -1   0  235.68   18.70 
  -7   1   0  263.47   19.50 
   7   1   0  237.78   19.30 
  -7   1   0  246.88   18.00 
  -9  -1   0  517.15   34.30 
  -9  -1   0  485.45   34.40 
   9  -1   0  523.75   36.00 
  -9   1   0  521.35   35.20 
  -9   1   0  481.65   34.10 
   9   1   0  527.95   35.70 
 -11  -1   0   90.69   10.70 
 -11  -1   0  100.29   11.50 
  11  -1   0   85.89   13.00 
 -11   1   0   74.69   11.40 
  11   1   0   91.59   12.30 
 -11   1   0   73.29   10.20 
  13  -1   0  232.48   28.50 
 -13  -1   0  222.48   18.30 
 -13  -1   0  180.98   19.60 
 -13   1   0  204.98   18.30 
  13   1   0  237.48   21.60 
 -13   1   0  178.68   20.90 
 -15  -1   0   18.50    7.40 
  15  -1   0   20.10   10.80 
 -15   1   0   25.00    9.50 
 -15   1   0   25.00    7.40 
  15   1   0   -1.10    9.50 
 -17  -1   0   63.39   10.50 
  17  -1   0   69.99   13.30 
  17   1   0   47.60   12.10 
 -17   1   0   53.79   10.90 
   0  -2   0 1266.57   74.79 
   0  -2   0 1236.68   74.69 
   0   2   0 1162.28   74.49 
   0   2   0 1249.68   74.79 
   0   2   0 1248.38   74.69 
   2  -2   0   96.59    8.00 
   2  -2   0   98.89    7.90 
   2  -2   0  124.19    9.10 
   2   2   0  103.99    7.80 
  -2   2   0  100.89    7.90 
  -2   2   0   98.89    8.10 
  -2   2   0  110.79    9.30 
   4  -2   0 1203.98   64.19 
   4  -2   0 1006.80   63.49 
  -4  -2   0  957.60   62.99 
  -4  -2   0 1090.99   63.99 
  -4  -2   0  857.41   63.69 
   4   2   0  980.40   62.99 
  -4   2   0 1011.50   63.49 
  -4   2   0 1042.70   64.19 
   4   2   0 1091.49   63.59 
   4   2   0 1059.29   63.89 
   6  -2   0   20.70    6.40 
   6  -2   0    7.70    4.30 
   6   2   0   10.50    4.50 
   6   2   0   17.10    5.20 
   6   2   0   16.60    3.90 
  -6   2   0   10.10    5.90 
  -6   2   0   12.60    4.60 
   8  -2   0  523.55   37.20 
   8   2   0  565.34   36.60 
  -8   2   0  510.25   37.00 
  -8   2   0  551.44   35.60 
 -10  -2   0   -2.70    5.40 
  10  -2   0   11.50    8.30 
 -10  -2   0   10.60    6.20 
  10   2   0    7.80    6.90 
 -10   2   0    1.60    7.80 
 -10   2   0   11.50    5.80 
  12  -2   0  169.48   20.70 
 -12  -2   0  189.38   17.90 
 -12  -2   0  174.58   17.00 
  12   2   0  204.08   19.60 
 -12   2   0  191.28   16.60 
 -12   2   0  174.28   20.60 
  14  -2   0    2.50    9.70 
 -14  -2   0   -7.50    7.00 
 -14  -2   0   11.30    6.80 
  14   2   0   12.30    9.00 
 -14   2   0    5.10    6.50 
 -16  -2   0   55.09    9.50 
 -16  -2   0   29.70    8.40 
  16  -2   0   46.20   12.20 
 -16   2   0   38.00    8.60 
 -16   2   0   33.20   10.00 
  16   2   0   31.70   11.00 
 -18  -2   0   15.10    7.40 
  18   2   0   16.10   12.80 
 -18   2   0    5.10    7.50 
   1  -3   0 1304.87   76.59 
  -1  -3   0 1313.07   76.69 
   1  -3   0 1185.18   76.59 
   1  -3   0 1197.68   76.29 
  -1  -3   0 1306.37   76.59 
  -1   3   0 1162.78   76.49 
   1   3   0 1206.08   76.29 
   1   3   0 1192.48   78.19 
  -1   3   0 1364.06   76.69 
  -1   3   0 1309.97   76.79 
   1   3   0 1277.27   76.19 
   3  -3   0  951.30   56.69 
  -3  -3   0  845.02   55.99 
   3  -3   0  914.51   56.49 
  -3  -3   0  911.61   56.09 
  -3   3   0  942.41   57.19 
   3   3   0  882.31   55.99 
   3   3   0  893.01   56.29 
  -3   3   0  933.91   56.69 
   3   3   0  971.70   56.89 
   5  -3   0 1180.68   68.09 
   5  -3   0 1056.59   67.49 
  -5  -3   0  991.30   66.99 
  -5   3   0 1096.59   68.29 
   5   3   0 1071.49   67.39 
   5   3   0 1121.19   67.89 
  -5   3   0 1182.68   70.09 
   5   3   0 1019.90   66.69 
   7  -3   0  374.16   25.70 
   7  -3   0  370.86   27.50 
   7   3   0  405.76   26.70 
  -7   3   0  360.16   27.90 
   7   3   0  379.66   27.30 
   7   3   0  365.76   25.10 
  -7   3   0  379.76   25.90 
   9  -3   0  562.04   39.10 
   9  -3   0  554.24   37.10 
  -9   3   0  535.55   37.00 
  -9   3   0  583.54   39.10 
   9   3   0  552.34   37.90 
   9   3   0  552.74   37.80 
 -11  -3   0   96.39   13.80 
  11  -3   0   89.99   13.60 
 -11  -3   0  109.19   11.40 
 -11   3   0   95.49   11.40 
  11   3   0  118.79   13.30 
 -11   3   0  114.19   13.60 
  13  -3   0  179.18   22.60 
 -13  -3   0  191.08   18.00 
 -13  -3   0  216.18   18.50 
  13   3   0  185.58   20.60 
 -13   3   0  204.08   18.00 
 -13   3   0  200.58   21.70 
  15  -3   0    3.20    9.70 
 -15  -3   0   15.60    7.80 
 -15  -3   0   16.80    8.00 
 -15   3   0    8.80    9.00 
 -15   3   0   28.10    7.90 
  15   3   0   18.50    9.50 
 -17  -3   0   71.59   10.50 
  17  -3   0   33.00   12.00 
 -17   3   0   55.29   10.60 
  17   3   0   67.79   12.80 
   0  -4   0 6130.99  354.46 
   0  -4   0 6052.79  354.06 
   0  -4   0 5615.54  354.46 
   0   4   0 6146.49  354.56 
   0   4   0 5552.94  353.96 
   0   4   0 5730.73  354.26 
  -2  -4   0  823.62   53.79 
   2  -4   0  854.21   53.99 
  -2  -4   0  915.51   54.59 
   2  -4   0  886.61   54.29 
   2   4   0  945.31   54.59 
   2   4   0  860.11   53.69 
   2   4   0  873.91   53.79 
  -2   4   0  890.81   55.39 
  -2   4   0  866.41   54.69 
  -4  -4   0 4206.48  248.38 
   4  -4   0 4119.99  248.08 
   4  -4   0 4209.78  247.98 
  -4  -4   0 3637.74  247.08 
  -4   4   0 4078.79  249.97 
   4   4   0 4058.89  247.18 
   4   4   0 4043.10  247.68 
  -4   4   0 4080.69  248.38 
   4   4   0 4390.06  248.48 
   6  -4   0  706.13   42.00 
   6  -4   0  618.44   39.70 
  -6   4   0  607.44   39.60 
   6   4   0  584.94   40.00 
  -6   4   0  646.24   41.00 
   6   4   0  579.34   38.70 
   6   4   0  586.24   39.50 
   8  -4   0 1716.73  107.19 
   8  -4   0 1720.23  107.19 
   8   4   0 1729.13  106.89 
   8   4   0 1684.93  106.39 
  -8   4   0 1769.72  107.29 
  -8   4   0 1789.02  106.29 
   8   4   0 1623.84  105.19 
  10  -4   0  249.38   19.80 
  10  -4   0  227.68   22.40 
 -10   4   0  260.97   20.10 
  10   4   0  258.47   20.60 
  10   4   0  241.68   21.10 
 -10   4   0  269.47   23.30 
 -12  -4   0  518.15   35.10 
  12  -4   0  473.15   37.60 
 -12  -4   0  524.85   36.10 
 -12   4   0  555.44   37.60 
 -12   4   0  538.65   35.40 
  12   4   0  466.35   36.20 
 -14  -4   0   96.59   13.30 
  14  -4   0   61.19   13.10 
 -14  -4   0   78.59   10.60 
 -14   4   0   98.49   12.70 
 -14   4   0  102.19   13.50 
  14   4   0   80.59   12.50 
 -16  -4   0   94.09   12.80 
  16  -4   0   97.79   14.60 
 -16  -4   0   78.59   12.10 
 -16   4   0   88.79   12.80 
  16   4   0  101.79   13.50 
 -18  -4   0   25.70    8.30 
  18  -4   0   23.50   10.70 
 -18   4   0   36.00   11.30 
   1  -5   0  392.56   25.60 
  -1  -5   0  412.16   26.30 
  -1  -5   0  415.46   25.60 
   1  -5   0  404.86   26.10 
  -1   5   0  393.96   26.40 
   1   5   0  407.46   25.50 
  -1   5   0  421.36   26.60 
   1   5   0  387.26   25.90 
   1   5   0  422.16   26.40 
   3  -5   0  233.38   16.40 
  -3  -5   0  227.38   16.90 
   3  -5   0  238.38   16.70 
  -3   5   0  246.68   18.40 
   3   5   0  221.78   16.10 
   3   5   0  263.57   17.40 
   3   5   0  226.28   16.00 
  -3   5   0  253.77   17.30 
   5  -5   0  412.66   28.10 
   5  -5   0  420.16   28.10 
   5   5   0  394.16   27.00 
  -5   5   0  435.96   28.40 
  -5   5   0  425.96   29.40 
   5   5   0  439.96   28.60 
   5   5   0  413.16   27.60 
   7  -5   0   95.69   12.00 
   7  -5   0   98.69   10.60 
   7   5   0   92.79   10.10 
  -7   5   0   77.99   11.10 
   7   5   0   86.49   11.50 
  -7   5   0   97.59   11.80 
   7   5   0  101.19    9.70 
   9  -5   0  253.17   19.10 
   9  -5   0  238.88   21.10 
   9   5   0  249.58   20.00 
  -9   5   0  271.97   23.30 
  -9   5   0  234.88   19.70 
   9   5   0  245.58   19.60 
   9   5   0  238.88   20.10 
  11  -5   0   38.30    7.30 
  11  -5   0   13.70    8.80 
  11   5   0   33.90    7.90 
 -11   5   0   30.70   10.10 
 -11   5   0   18.50    7.30 
  11   5   0   28.00    8.10 
 -13  -5   0  107.69   14.70 
 -13  -5   0  110.69   11.50 
  13  -5   0   82.89   13.40 
 -13   5   0  100.49   13.70 
 -13   5   0  107.79   12.20 
 -15  -5   0   12.80    7.70 
 -15  -5   0   10.70    7.00 
  15  -5   0    9.80   10.10 
 -15   5   0    5.00    9.20 
  15   5   0    8.90    8.80 
 -15   5   0    4.20    7.50 
  17  -5   0   20.60   12.00 
 -17  -5   0   33.30    8.20 
  17   5   0   12.10    9.40 
 -17   5   0   29.50    9.70 
   0  -6   0  639.84   41.70 
   0  -6   0  615.54   38.60 
   0   6   0  643.44   39.50 
   0   6   0  588.04   39.00 
  -2  -6   0  103.99    9.60 
   2  -6   0  105.39    9.10 
   2  -6   0  114.49    9.40 
   2   6   0  104.79   10.00 
  -2   6   0  112.19   10.40 
   2   6   0   98.49    8.50 
  -2   6   0  119.69   11.50 
   2   6   0   98.89    9.60 
   4  -6   0  440.66   30.20 
   4  -6   0  472.15   30.70 
   4   6   0  481.15   31.20 
  -4   6   0  464.45   32.10 
   4   6   0  461.95   30.10 
   4   6   0  469.55   30.00 
  -4   6   0  475.15   31.00 
   6  -6   0   35.80    6.70 
   6  -6   0   32.80    6.40 
   6   6   0   45.30    7.50 
  -6   6   0   28.60    6.90 
   6   6   0   31.10    5.00 
  -6   6   0   41.50    8.80 
   8  -6   0  246.58   19.70 
   8  -6   0  249.68   18.70 
  -8   6   0  252.17   19.30 
   8   6   0  225.18   17.30 
  -8   6   0  270.67   22.50 
   8   6   0  202.88   18.50 
  10  -6   0   -1.70    5.70 
  10  -6   0    3.50    7.00 
 -10   6   0    9.00    9.00 
  10   6   0    7.70    6.20 
  10   6   0    9.10    6.40 
 -10   6   0    3.60    6.40 
  10   6   0   12.60    5.10 
  12  -6   0   54.99   11.00 
 -12   6   0   76.19   12.20 
 -12   6   0   82.29   10.20 
  12   6   0   64.39   10.50 
  12   6   0   64.69   10.50 
 -14  -6   0    0.30    6.40 
  14  -6   0   -8.30    8.30 
 -14  -6   0   14.10    7.70 
  14   6   0   -0.60    7.80 
 -14   6   0    5.30    9.50 
 -14   6   0    8.70    6.90 
  16  -6   0   17.30    9.90 
 -16  -6   0   15.40    7.60 
 -16  -6   0    3.90    7.80 
  16   6   0   20.90    9.10 
 -16   6   0    4.40    9.00 
   1  -7   0  463.35   29.70 
   1  -7   0  451.95   30.30 
  -1  -7   0  427.46   30.20 
  -1  -7   0  507.05   29.80 
   1   7   0  471.75   30.20 
   1   7   0  496.05   30.80 
  -1   7   0  451.85   30.60 
  -1   7   0  453.65   30.80 
   3  -7   0  322.67   21.30 
   3   7   0  299.77   20.60 
   3   7   0  306.07   21.00 
   3   7   0  313.27   22.00 
  -3   7   0  302.87   22.90 
  -3   7   0  313.57   22.10 
   5  -7   0  425.56   28.90 
   5   7   0  402.16   29.30 
  -5   7   0  455.05   31.00 
   5   7   0  454.45   29.70 
   5   7   0  428.16   28.20 
  -5   7   0  437.46   29.80 
   7  -7   0  155.68   14.70 
   7  -7   0  140.09   13.70 
   7   7   0  156.18   12.80 
   7   7   0  146.59   14.10 
  -7   7   0  155.38   15.10 
   7   7   0  144.29   14.50 
  -7   7   0  180.38   18.50 
   9  -7   0  367.36   24.30 
   9  -7   0  328.57   22.60 
  -9   7   0  322.37   25.60 
  -9   7   0  311.27   23.20 
   9   7   0  254.27   21.00 
   9   7   0  276.07   22.40 
   9   7   0  295.07   23.50 
  11  -7   0   34.50    9.00 
  11   7   0   41.90    7.10 
 -11   7   0   53.99    9.30 
  11   7   0   48.80    8.80 
  11   7   0   41.50    8.90 
 -11   7   0   35.50   11.50 
  13  -7   0   83.09   12.80 
 -13   7   0  103.39   14.00 
  13   7   0  105.09   13.50 
 -13   7   0  110.99   12.60 
  13   7   0  107.69   12.80 
 -15  -7   0   15.00    6.60 
  15  -7   0    7.30    9.30 
 -15  -7   0    0.50    7.90 
 -15   7   0   11.10   10.30 
  15   7   0   12.70    8.20 
  17  -7   0   17.90    9.90 
 -17   7   0   33.60   10.70 
  17   7   0   26.00    9.30 
   0  -8   0 1336.07   86.49 
   0  -8   0 1395.86   85.99 
   0   8   0 1461.15   86.99 
   0   8   0 1422.26   86.59 
   2  -8   0  258.47   18.80 
  -2   8   0  249.97   20.50 
   2   8   0  283.97   19.70 
   2   8   0  274.97   19.80 
   2   8   0  241.58   18.00 
  -2   8   0  304.87   20.20 
   4  -8   0 1106.79   68.79 
   4  -8   0 1012.60   68.89 
   4   8   0 1151.38   69.89 
  -4   8   0 1086.39   70.09 
  -4   8   0 1159.98   69.69 
   4   8   0 1125.59   68.59 
   6  -8   0  166.88   14.70 
   6  -8   0  176.88   15.00 
  -6   8   0  175.68   18.70 
   6   8   0  183.88   15.50 
   6   8   0  164.78   14.20 
  -6   8   0  151.98   15.90 
   8  -8   0  575.24   37.40 
   8  -8   0  539.15   37.00 
   8   8   0  581.34   38.00 
  -8   8   0  635.54   40.10 
  -8   8   0  570.34   37.40 
   8   8   0  494.85   36.50 
   8   8   0  522.35   35.80 
  10  -8   0   87.49   10.70 
  10  -8   0   81.59   10.60 
 -10   8   0   77.49   10.40 
  10   8   0   75.99   10.90 
 -10   8   0  100.29   17.50 
  10   8   0   64.49    9.60 
  10   8   0   74.79    9.90 
  12  -8   0  198.18   19.70 
 -12   8   0  196.48   18.30 
  12   8   0  172.98   18.70 
 -12   8   0  225.08   22.30 
  14  -8   0   24.40    9.90 
  14   8   0   31.30    8.90 
 -14   8   0   12.70   10.60 
  14   8   0   29.20    7.80 
 -16  -8   0   44.70   10.00 
  16  -8   0   42.10   16.90 
  16   8   0   40.60    9.70 
   1  -9   0   43.00    5.80 
   1  -9   0   40.00    6.10 
   1   9   0   40.70    6.70 
  -1   9   0   33.20    7.10 
   1   9   0   43.70    7.20 
  -1   9   0   31.00    7.00 
   3  -9   0   30.60    5.70 
   3  -9   0   17.90    5.40 
   3   9   0   22.20    5.60 
   3   9   0   11.40    5.50 
   3   9   0   16.50    4.70 
  -3   9   0   18.90    6.80 
  -3   9   0   10.80    7.40 
   5  -9   0   98.89    9.90 
   5  -9   0   73.29    8.80 
   5   9   0   60.99    9.00 
  -5   9   0   70.89    9.40 
   5   9   0   62.49    7.90 
   5   9   0   70.09    7.90 
  -5   9   0   53.89   10.10 
   7  -9   0   -9.40    5.00 
   7  -9   0    6.20    5.70 
  -7   9   0    7.10    6.60 
   7   9   0   -2.20    4.90 
  -7   9   0    4.80    8.60 
   7   9   0    6.40    5.60 
   7   9   0    4.00    4.60 
   9  -9   0   57.09   10.00 
   9  -9   0   41.40    8.40 
  -9   9   0   61.09    9.40 
  -9   9   0   61.79   13.10 
   9   9   0   50.39    8.00 
   9   9   0   56.79    7.40 
   9   9   0   60.49    9.60 
  11  -9   0    3.20    7.30 
  11   9   0    1.50    6.20 
 -11   9   0    8.70    9.90 
  11   9   0   14.00    6.50 
 -11   9   0    5.50    7.00 
  13  -9   0   19.80    8.80 
  13   9   0   28.20    8.40 
 -13   9   0   22.90   10.80 
  15  -9   0    3.00    8.20 
  15   9   0   16.40    7.70 
 -15   9   0    4.40    9.70 
   0 -10   0   94.49   10.30 
   0  10   0   94.89   12.50 
   0  10   0   96.69   12.40 
   2 -10   0   69.99    7.50 
   2  10   0   47.50    6.30 
  -2  10   0   57.09    8.90 
   2  10   0   65.89    8.70 
  -2  10   0   62.39    9.00 
   2  10   0   58.09    7.80 
   4 -10   0   90.99   11.80 
   4 -10   0   65.59    8.00 
  -4  10   0   53.19   10.00 
  -4  10   0   51.29    9.00 
   4  10   0   55.79    7.20 
   4  10   0   60.99    8.80 
   4  10   0   55.89    7.40 
   6 -10   0   32.60    6.90 
   6 -10   0   35.60    8.00 
   6  10   0   32.00    6.20 
  -6  10   0   23.70    7.80 
  -6  10   0   25.40    9.60 
   6  10   0   37.50    6.30 
   6  10   0   28.80    6.70 
   8 -10   0   33.50    8.00 
   8  10   0   40.70    7.20 
  -8  10   0   43.00    8.80 
   8  10   0   24.80    6.10 
  -8  10   0   37.90   10.90 
   8  10   0   36.20    8.10 
  10 -10   0   10.70    7.30 
 -10  10   0    3.10    7.10 
 -10  10   0   20.10   10.40 
  10  10   0    8.10    6.30 
  10  10   0   14.40    4.90 
  10  10   0   -0.90    5.90 
  12 -10   0   13.70    8.00 
 -12  10   0    9.30   10.30 
  12  10   0   10.50    7.00 
  12  10   0   30.70    7.90 
  14 -10   0   15.80    8.40 
  14  10   0    0.90    6.10 
 -14  10   0   -1.80    9.90 
  14  10   0    7.30    7.10 
   1 -11   0  173.68   14.30 
   1  11   0  151.38   15.90 
  -1  11   0  183.98   16.10 
   1  11   0  169.38   15.80 
  -1  11   0  178.78   16.30 
   3 -11   0  123.69   12.60 
   3  11   0  132.29   13.20 
   3  11   0  105.59   11.60 
   3  11   0  133.09   13.80 
  -3  11   0  124.99   15.70 
  -3  11   0  140.09   14.70 
   5 -11   0  152.08   14.00 
   5  11   0  128.39   14.60 
  -5  11   0  144.89   15.50 
  -5  11   0  140.79   18.10 
   5  11   0  137.69   13.60 
   5  11   0  149.09   13.10 
   7 -11   0   68.19    8.90 
   7  11   0   47.00    7.70 
  -7  11   0   56.39   11.50 
  -7  11   0   46.90    9.50 
   7  11   0   61.99    7.90 
   7  11   0   61.39    9.50 
   9 -11   0   79.39   10.90 
   9  11   0   86.39   10.00 
   9  11   0   93.59   11.70 
  -9  11   0   67.19   11.20 
  -9  11   0   92.19   13.60 
  11 -11   0   17.50    8.30 
  11  11   0   32.40    7.50 
  11  11   0   11.60    6.90 
 -11  11   0   21.70   11.00 
  13 -11   0   45.10    9.80 
  13  11   0   32.90    8.30 
 -13  11   0   28.30   11.50 
  13  11   0   50.69    9.50 
   0  12   0  349.87   25.40 
   0  12   0  333.27   25.70 
   2 -12   0   41.40    6.90 
   2  12   0   26.70    5.70 
  -2  12   0   27.60    7.80 
   2  12   0   29.90    7.50 
   2  12   0   41.60    7.30 
  -2  12   0   35.30    8.50 
   4 -12   0  269.27   19.20 
   4  12   0  234.38   18.30 
  -4  12   0  222.88   20.70 
   4  12   0  232.18   20.30 
   4  12   0  261.67   19.10 
  -4  12   0  242.78   23.30 
   6 -12   0   25.40    7.00 
   6  12   0   20.40    6.10 
  -6  12   0   13.10    7.80 
   6  12   0   17.90    5.90 
  -6  12   0   23.60    9.90 
   6  12   0   12.70    6.20 
   8 -12   0  133.29   13.70 
   8  12   0   87.59   12.10 
   8  12   0   91.89   10.40 
   8  12   0  109.09   11.30 
  -8  12   0  102.19   14.00 
  -8  12   0  112.89   14.80 
  10 -12   0   27.10    8.10 
  10  12   0   16.10    6.40 
  10  12   0   22.20    7.30 
 -10  12   0   21.10   11.00 
  12 -12   0   25.80    8.90 
  12  12   0   29.20    7.90 
  12  12   0   36.60    7.80 
 -12  12   0   56.59   12.70 
   1 -13   0   10.10    5.60 
   1  13   0    2.30    6.60 
  -1  13   0    5.80    7.40 
  -1  13   0    1.90    6.80 
   1  13   0    6.60    4.90 
   1  13   0  -13.70    8.00 
   3 -13   0   -2.30    5.20 
  -3  13   0   -0.10    7.90 
   3  13   0   -8.80    6.00 
   3  13   0    1.90    6.00 
  -3  13   0   14.40    7.50 
   5 -13   0   12.90    6.50 
   5  13   0    5.50    5.80 
  -5  13   0   12.00    7.10 
   5  13   0    8.30    5.60 
  -5  13   0    5.20    9.00 
   7 -13   0   11.00    6.80 
  -7  13   0   -1.30    7.80 
   7  13   0   -0.50    5.30 
  -7  13   0   -4.40    9.30 
   7  13   0   -2.10    5.10 
   7  13   0    7.10    5.70 
   9 -13   0   11.90    7.30 
   9  13   0   24.80    7.50 
   9  13   0    6.70    7.70 
  -9  13   0    2.90   10.20 
  11 -13   0    0.60    7.00 
  11  13   0    5.90    6.40 
 -11  13   0    2.40   10.60 
  11  13   0    4.20    6.00 
   0  14   0   13.90    7.40 
   0  14   0   35.20    8.60 
   2 -14   0   -1.60    5.50 
   2  14   0    7.40    6.20 
   2  14   0    1.90    5.10 
  -2  14   0  -12.40    6.80 
  -2  14   0   -0.10    7.90 
   2  14   0   -2.30    7.10 
   4 -14   0   23.30    7.00 
   4  14   0   20.30    6.70 
  -4  14   0   21.70    8.00 
   4  14   0   11.40    6.60 
  -4  14   0   23.70    9.20 
   4  14   0   16.30    5.80 
   6 -14   0    1.30    6.10 
  -6  14   0   12.50    7.60 
   6  14   0    3.20    5.30 
   6  14   0    3.90    5.50 
  -6  14   0   -6.90    8.80 
   8 -14   0   11.10    7.20 
  -8  14   0   19.50   10.20 
   8  14   0   -0.10    5.70 
  10 -14   0    4.30    6.90 
  10  14   0    0.50    5.80 
  10  14   0    6.70    5.60 
  -1  15   0   25.00    8.00 
  -1  15   0   61.09   10.10 
   1  15   0   35.40    8.70 
   1  15   0   47.20    9.00 
   3 -15   0   30.50    7.40 
   3  15   0   36.60    7.10 
  -3  15   0   37.70    9.50 
   3  15   0   32.50    7.70 
  -3  15   0   26.10    9.60 
   3  15   0   30.60    7.90 
   5 -15   0   22.20    7.00 
   5  15   0   45.80    7.40 
   5  15   0   28.80    7.80 
  -5  15   0   35.50   10.10 
   7 -15   0   17.80    7.10 
   7  15   0   16.90    6.00 
  -7  15   0   19.00   10.10 
   7  15   0    5.00    6.30 
   9 -15   0   25.90    7.90 
   9  15   0   43.70    8.60 
  -9  15   0   14.70   10.30 
   0  16   0   48.50    7.70 
   0  16   0   42.60    9.30 
   0  16   0   68.39   10.00 
  -2  16   0    9.30    8.40 
   2  16   0    3.90    6.90 
   2  16   0   -2.70    6.60 
   4 -16   0   41.40    7.80 
   4  16   0   49.40    8.10 
  -4  16   0   45.40   10.20 
   4  16   0   31.30    7.90 
   6 -16   0   17.30    6.40 
  -6  16   0   23.80    9.90 
   6  16   0    2.40    5.70 
   6  16   0    5.90    6.10 
  -1  17   0   -0.30    7.60 
   1  17   0    3.00    7.10 
  -3  17   0    8.10    8.70 
   3  17   0   -1.40    6.30 
 -18   0   1   -8.80    7.10 
  18   0  -1    5.80   12.20 
 -16   0   1   -7.80    6.80 
 -16   0   1    8.70    8.40 
  16   0  -1   -5.10    9.30 
  14   0  -1   -2.30    8.50 
 -14   0   1    9.30    8.60 
 -14   0   1   -7.90    6.50 
 -12   0   1   -7.00    7.70 
  12   0  -1    0.70    8.40 
 -12   0   1   -6.50    6.20 
  10   0  -1    2.40    7.00 
 -10   0   1   -1.60    7.10 
 -10   0   1   -2.30    5.40 
  -8   0   1   -2.50    4.80 
  -8   0   1   -3.10    5.60 
   8   0  -1   -4.70    5.20 
  -6   0   1   -5.50    4.10 
  -6   0   1   -1.20    4.80 
   6   0  -1   -1.30    4.40 
  -6   0   1    0.80    4.00 
  -4   0   1    2.00    3.30 
  -4   0   1    4.70    3.10 
   4   0  -1   -2.80    3.40 
  -4   0   1    0.90    3.60 
  -4   0   1   -3.90    3.60 
  -2   0   1    4.40    1.80 
  -2   0   1    1.10    2.50 
   2   0  -1    1.90    1.60 
  -2   0   1   -0.70    1.90 
   2   0  -1   -0.70    1.70 
   2   0  -1    0.30    1.50 
  -2   0  -1    0.80    1.70 
  -2   0  -1    4.00    1.70 
   2   0   1    1.20    2.30 
   2   0   1    0.50    1.80 
   2   0   1    1.20    1.70 
  -2   0  -1    2.80    1.70 
   4   0   1   -0.50    4.10 
  -4   0  -1    3.90    3.20 
  -4   0  -1   -4.60    2.60 
  -4   0  -1   -0.70    2.70 
  -4   0  -1   -3.50    2.90 
   4   0   1    5.00    3.20 
  -6   0  -1    1.40    3.90 
   6   0   1   -9.50    5.00 
   8   0   1   -2.00    6.80 
  -8   0  -1   -2.60    5.60 
 -10   0  -1   -1.40    6.60 
 -10   0  -1   -6.70    5.00 
  10   0   1    4.00    8.30 
 -12   0  -1   -7.50    7.00 
 -12   0  -1  -12.60    5.30 
  12   0   1   -9.60    9.40 
 -14   0  -1    5.80    9.00 
  14   0   1  -13.80    9.30 
  16   0   1   -1.50   10.50 
 -16   0  -1   18.50    9.10 
 -16   0  -1  -17.70   10.40 
 -18   0  -1   -0.60    8.00 
 -17  -1   1  -11.60    7.30 
 -17  -1   1   -2.00    7.30 
  17  -1  -1   14.60   10.10 
 -17   1   1   -9.70    6.80 
 -17   1   1   10.50    8.10 
  17   1  -1   10.30   10.00 
  15  -1  -1   10.60    9.50 
 -15  -1   1    8.30    8.30 
 -15  -1   1    0.00    6.90 
 -15   1   1   15.80   14.20 
  15   1  -1    9.80    9.00 
 -15   1   1   -5.00    9.10 
 -13  -1   1    4.30    7.60 
 -13  -1   1    0.60    6.40 
  13  -1  -1  -12.70    8.20 
  13   1  -1   11.40    8.50 
 -13   1   1   18.10    9.00 
 -13   1   1    2.70    6.80 
 -11  -1   1   15.40    7.60 
  11  -1  -1    8.50    7.90 
 -11  -1   1    7.50    6.50 
 -11   1   1    4.00    6.30 
 -11   1   1    6.50    8.30 
  11   1  -1    8.60    7.40 
  -9  -1   1   -6.20    6.00 
  -9  -1   1    4.50    5.60 
   9  -1  -1   10.40    7.10 
   9   1  -1    4.90    6.30 
  -9   1   1    4.10    7.50 
  -9   1   1    7.90    5.70 
  -7  -1   1    9.30    4.80 
   7  -1  -1    2.10   10.20 
  -7  -1   1   10.20    5.10 
  -7   1   1   15.60    5.00 
  -7   1   1    8.10    6.30 
   7   1  -1    6.30    5.30 
  -5  -1   1   -7.70    3.00 
   5  -1  -1    0.70    4.00 
  -5  -1   1    6.10    2.40 
  -5  -1   1    1.30    3.50 
   5  -1  -1    7.90    3.50 
  -5   1   1    6.30    3.70 
   5   1  -1    5.20    3.90 
   5   1  -1    6.60    3.60 
  -5   1   1    1.00    4.90 
   3  -1  -1    9.60    3.40 
  -3  -1   1    9.90    2.90 
  -3  -1   1    7.10    2.80 
   3  -1  -1    2.50    3.60 
   3  -1  -1    5.80    2.70 
  -3   1   1   12.40    4.00 
   3   1  -1    4.80    3.00 
  -3   1   1    9.20    2.90 
  -3   1   1    3.10    3.00 
   1  -1  -1    3.00    1.30 
   1   1  -1    1.10    1.00 
  -1   1   1   -1.70    1.30 
  -1   1   1    5.30    1.20 
  -1  -1  -1    2.90    1.20 
   1  -1   1    1.00    1.20 
   1  -1   1    3.40    1.20 
  -1  -1  -1    2.60    1.20 
   1   1   1    1.00    1.20 
  -1   1  -1   -0.10    1.50 
  -1   1  -1    3.50    1.10 
   1   1   1    3.60    1.30 
   3  -1   1   26.50    4.60 
  -3  -1  -1   27.00    3.80 
  -3  -1  -1   25.00    3.80 
  -3  -1  -1   16.90    3.10 
   3   1   1   23.80    3.40 
   3   1   1   22.90    4.30 
  -3   1  -1   21.20    3.50 
  -3   1  -1   22.70    4.10 
  -3   1  -1   20.40    3.40 
  -3   1  -1   28.40    3.60 
   3   1   1   22.90    3.60 
   5  -1   1    7.30    5.10 
   5   1   1   17.50    5.00 
  -5   1  -1    8.70    3.60 
   5   1   1   11.10    3.60 
   5   1   1   11.40    4.00 
  -5   1  -1    5.30    4.20 
  -7  -1  -1   14.00    4.90 
   7  -1   1   18.50    7.40 
   7   1   1   20.70    7.00 
  -7   1  -1   12.80    6.60 
  -7   1  -1   22.40    5.10 
  -9  -1  -1   23.00    6.00 
  -9  -1  -1   12.30    7.00 
   9  -1   1   21.90    8.60 
  -9   1  -1    3.20    6.70 
   9   1   1   13.00    7.80 
  -9   1  -1   15.80    5.50 
  11  -1   1   13.20    9.50 
 -11  -1  -1    3.10    6.80 
 -11  -1  -1   18.80    6.10 
 -11   1  -1    7.10    5.50 
 -11   1  -1   -3.50    7.30 
  11   1   1   12.60    8.50 
 -13  -1  -1    8.80    7.40 
 -13  -1  -1    5.90    6.10 
  13   1   1    7.30    9.80 
 -13   1  -1   13.70    6.40 
 -13   1  -1   -4.10    7.90 
 -15  -1  -1   11.60    7.60 
  15  -1   1   21.00   11.50 
 -15  -1  -1    5.00    6.40 
 -15   1  -1    3.80    6.20 
  15   1   1   13.10   10.50 
 -15   1  -1    3.40    8.50 
  17  -1   1   -1.30   10.70 
 -17  -1  -1   -4.50    7.90 
  17   1   1  -19.60    9.70 
 -17   1  -1   -2.70    8.00 
 -18  -2   1    4.60    7.40 
  18   2  -1   23.80   10.70 
 -18   2   1  -10.10    7.50 
  16  -2  -1   -1.70    9.80 
 -16  -2   1    1.20    6.70 
 -16  -2   1    0.60   12.40 
 -16   2   1    7.90    7.10 
 -16   2   1   11.60    9.00 
  16   2  -1    2.20    8.80 
 -14  -2   1    7.50    7.00 
 -14  -2   1    6.90    7.80 
  14  -2  -1    7.20    9.00 
  14   2  -1   -9.30    7.50 
 -14   2   1    3.10    8.30 
 -14   2   1   13.50    7.00 
 -12  -2   1   -1.20    6.30 
  12  -2  -1   11.10    9.10 
 -12  -2   1   -8.80    6.90 
 -12   2   1   -3.40    8.40 
  12   2  -1   -3.10    7.00 
 -12   2   1   13.80    6.90 
  10  -2  -1    9.40    7.80 
 -10  -2   1   -2.40    5.70 
 -10  -2   1   11.40    6.50 
 -10   2   1    8.20    8.70 
  10   2  -1   -1.80    6.20 
 -10   2   1    7.70    6.10 
   8  -2  -1    3.90    4.30 
   8  -2  -1   10.90    6.50 
  -8  -2   1   -2.20    5.20 
   8   2  -1    2.20    5.40 
  -8   2   1   -3.70    4.70 
  -8   2   1    4.60    7.40 
  -6  -2   1    9.70    2.90 
   6  -2  -1    2.90    5.20 
   6  -2  -1   12.70    4.50 
  -6  -2   1   17.10    4.50 
   6   2  -1   10.60    4.70 
  -6   2   1   18.60    6.70 
  -6   2   1   15.20    4.80 
   6   2  -1   11.50    4.60 
   4  -2  -1   13.00    3.80 
   4  -2  -1   15.90    4.40 
  -4  -2   1   14.60    4.10 
   4   2  -1   10.50    3.70 
  -4   2   1   13.20    3.90 
   4   2  -1   12.40    3.90 
  -4   2   1   13.60    5.40 
  -2  -2   1   37.80    4.80 
   2  -2  -1   26.00    3.70 
   2  -2  -1   33.00    4.00 
   2  -2  -1   38.60    4.40 
  -2  -2   1   27.40    3.20 
   2   2  -1   31.20    3.40 
  -2   2   1   35.00    4.30 
   2   2  -1   31.30    4.40 
  -2   2   1   20.80    3.60 
  -2   2   1   31.10    3.70 
   0  -2   1   10.80    1.80 
   0  -2  -1   11.90    2.10 
   0  -2   1   17.10    2.80 
   0  -2  -1   15.30    2.10 
   0   2  -1   10.30    1.70 
   0   2   1   11.70    2.20 
   0   2   1   11.80    2.20 
   0   2  -1   12.00    1.80 
   0   2  -1   14.00    2.70 
   2  -2   1   27.30    3.60 
   2  -2   1   32.80    4.60 
  -2  -2  -1   18.70    3.40 
   2   2   1   26.10    3.70 
  -2   2  -1   22.50    3.10 
  -2   2  -1   29.80    3.40 
   2   2   1   19.70    3.10 
  -2   2  -1   27.30    4.40 
  -4  -2  -1    6.20    3.90 
   4  -2   1   13.70    4.50 
  -4  -2  -1    4.90    3.10 
  -4  -2  -1   12.90    3.50 
   4   2   1    3.50    3.70 
  -4   2  -1    6.90    4.60 
   4   2   1    8.80    3.50 
  -4   2  -1    9.00    3.60 
   4   2   1    7.80    2.90 
   6  -2   1    8.20    6.00 
   6  -2   1   15.40    4.30 
  -6   2  -1   14.50    5.60 
   6   2   1   -4.00    4.70 
   6   2   1    1.70    4.10 
  -6   2  -1    5.70    4.00 
   6   2   1    6.70    3.70 
   8  -2   1   -1.60    7.30 
  -8   2  -1    3.20    6.40 
  -8   2  -1   15.60    8.50 
   8   2   1   13.30    7.10 
   8   2   1   -3.10    6.20 
  10  -2   1    3.20    8.60 
 -10   2  -1   -3.40    7.00 
  10   2   1    7.30    7.80 
 -10   2  -1    0.40    5.20 
  12  -2   1   -5.30    9.30 
 -12  -2  -1   -6.20    5.50 
 -12  -2  -1    4.10    6.70 
 -12   2  -1   -1.40    5.90 
  12   2   1   -7.90    8.20 
 -12   2  -1    2.50    8.40 
 -14  -2  -1   -5.30    6.80 
  14  -2   1    3.40   10.00 
 -14  -2  -1    3.90    6.40 
  14   2   1   -3.20    9.20 
 -14   2  -1    0.60    8.80 
 -14   2  -1    1.10    6.00 
  16  -2   1    8.20   10.80 
 -16  -2  -1    1.30    6.70 
 -16  -2  -1   -1.40    7.30 
  16   2   1    6.70   10.30 
 -16   2  -1    2.30    8.40 
 -18  -2  -1  -19.40    6.50 
  18  -2   1  -24.50    9.00 
  18   2   1   -7.40   19.50 
 -18   2  -1   -3.60    7.60 
 -17  -3   1   -1.50    7.20 
 -17  -3   1   13.70    8.00 
  17  -3  -1   17.90   10.60 
 -17   3   1   -0.30    8.40 
  17   3  -1    6.60    9.20 
  15  -3  -1   -0.30   10.10 
 -15  -3   1   10.20    7.50 
 -15  -3   1   17.40    7.90 
 -15   3   1    2.70    9.40 
  15   3  -1   16.40    9.50 
 -15   3   1   33.60    9.90 
 -13  -3   1   22.40    8.90 
  13  -3  -1   26.30   10.90 
 -13  -3   1   12.30    7.90 
  13   3  -1   27.30    9.50 
 -13   3   1   34.60    8.00 
 -13   3   1   20.70    9.80 
 -11  -3   1   28.10    7.80 
  11  -3  -1   31.50    9.50 
 -11  -3   1   36.60    7.50 
 -11   3   1   19.60    9.40 
  11   3  -1   22.60    7.90 
 -11   3   1   11.00    7.00 
  -9  -3   1   76.09    9.30 
   9  -3  -1   84.69   10.00 
   9  -3  -1   74.39   11.10 
   9   3  -1   71.19   10.00 
  -9   3   1   96.49   12.10 
   9   3  -1   69.79    9.80 
  -9   3   1   81.69    9.80 
   7  -3  -1   71.69    8.30 
   7  -3  -1   56.69    9.00 
   7   3  -1   61.69    8.80 
   7   3  -1   75.79    9.90 
  -7   3   1   80.79   11.30 
  -7   3   1   70.89    8.40 
   5  -3  -1  137.59   16.20 
   5  -3  -1  176.38   14.30 
  -5  -3   1  160.98   13.40 
   5   3  -1  165.58   13.20 
  -5   3   1  174.88   15.30 
  -5   3   1  170.28   13.20 
   5   3  -1  170.68   13.40 
   3  -3  -1   83.79    7.90 
   3  -3  -1   85.69    7.90 
  -3  -3   1   83.09    8.10 
  -3  -3   1   68.49    6.90 
   3   3  -1   84.39    7.50 
   3   3  -1   75.79    7.70 
  -3   3   1   88.69    9.50 
  -3   3   1   76.69    8.00 
  -3   3   1   74.09    7.30 
  -1  -3   1  218.58   14.60 
  -1  -3   1  232.28   14.40 
  -1  -3   1  220.28   14.40 
   1  -3  -1  220.68   14.70 
   1  -3  -1  228.38   14.80 
  -1   3   1  223.68   15.10 
   1   3  -1  229.58   14.80 
   1   3  -1  218.58   14.30 
   1   3  -1  219.38   14.30 
  -1   3   1  215.08   14.90 
   1  -3   1   55.89    7.60 
  -1  -3  -1   75.09    6.90 
  -1  -3  -1   52.99    5.70 
   1  -3   1   61.69    5.60 
  -1   3  -1   68.99    7.70 
   1   3   1   57.89    6.20 
  -1   3  -1   60.59    5.10 
  -1   3  -1   72.19    5.80 
   1   3   1   57.49    5.80 
  -3  -3  -1  119.99   10.70 
   3  -3   1  157.78   11.50 
  -3  -3  -1  152.28   10.50 
  -3  -3  -1  142.09   11.50 
   3   3   1  160.58   11.60 
   3   3   1  160.38   11.20 
   3   3   1  160.48   11.20 
  -3   3  -1  157.58   11.40 
  -3   3  -1  153.48   13.30 
   5  -3   1   27.30    4.80 
   5  -3   1   29.60    5.70 
   5   3   1   24.40    5.30 
  -5   3  -1   30.50    4.90 
   5   3   1   12.80    3.80 
   5   3   1   14.50    4.60 
  -5   3  -1   50.29    7.00 
   7  -3   1   36.20    7.90 
   7  -3   1   70.99    8.50 
  -7   3  -1   63.49    9.00 
   7   3   1   40.10    6.20 
   7   3   1   47.40    7.30 
  -7   3  -1   48.60    7.10 
   7   3   1   46.30    7.80 
   9  -3   1   17.10    8.10 
  -9   3  -1   20.60    7.00 
   9   3   1   -1.80    6.10 
  -9   3  -1   27.30    8.40 
   9   3   1   11.80    6.00 
   9   3   1    2.80    4.80 
  11  -3   1   21.90    9.50 
 -11  -3  -1   19.50    6.50 
 -11   3  -1   15.70    9.00 
 -11   3  -1   15.40    6.50 
  11   3   1   26.50    9.00 
  13  -3   1   10.60   10.10 
 -13  -3  -1    2.90    6.30 
 -13  -3  -1    5.10    6.90 
  13   3   1   -7.40    8.50 
 -13   3  -1    4.10    6.30 
  15  -3   1    6.40   10.30 
 -15  -3  -1    9.90    7.20 
 -15  -3  -1    1.90    7.20 
 -15   3  -1   13.50    9.40 
  15   3   1   -3.40    9.60 
 -15   3  -1   10.30    6.80 
 -17  -3  -1  -14.90    6.80 
  17  -3   1   -6.80    9.60 
  17   3   1   -3.90    9.20 
 -17   3  -1   -2.80    8.00 
  18  -4  -1   11.60    9.80 
 -18  -4   1   -6.90    7.00 
 -18   4   1    5.50    8.50 
 -16  -4   1   -7.70    7.00 
 -16  -4   1   -9.70    7.30 
  16  -4  -1  -13.10    9.30 
 -16   4   1    3.20    7.40 
 -16   4   1    0.20    8.90 
  16   4  -1    0.90    8.50 
 -14  -4   1    8.90    7.20 
  14  -4  -1    3.30    9.60 
 -14  -4   1   -3.50    6.90 
 -14   4   1    4.20    9.10 
 -14   4   1    5.90    7.00 
  14   4  -1    6.10    8.30 
 -12  -4   1   10.20    9.90 
  12  -4  -1    2.90    9.20 
 -12  -4   1    3.10    6.40 
 -12   4   1    0.10    6.50 
 -12   4   1    8.10    9.30 
  12   4  -1    3.60    7.40 
  10  -4  -1   17.60    8.60 
  10   4  -1   13.70    7.00 
 -10   4   1   17.50    9.10 
 -10   4   1   17.70    6.70 
  10   4  -1   17.30    6.60 
   8  -4  -1   14.30    5.00 
   8  -4  -1    3.60    7.10 
   8   4  -1    6.90    5.80 
   8   4  -1    5.90    4.10 
  -8   4   1   14.30    6.00 
   8   4  -1   -2.00    5.00 
  -8   4   1   13.60    8.30 
   6  -4  -1   66.99    8.70 
   6  -4  -1   46.20    7.70 
  -6   4   1   59.19    7.60 
   6   4  -1   60.69    8.20 
   6   4  -1   65.89    7.60 
  -6   4   1   60.49   10.50 
  -4  -4   1   26.10    8.00 
   4  -4  -1   16.20    4.70 
   4   4  -1   20.90    4.80 
   4   4  -1   21.60    4.40 
  -4   4   1   23.60    6.10 
  -4   4   1   22.50    5.40 
  -2  -4   1  101.69    8.50 
   2  -4  -1   88.29    7.60 
   2  -4  -1   98.89    8.40 
  -2   4   1  102.29    9.20 
   2   4  -1  102.99    7.70 
  -2   4   1  105.39    9.60 
  -2   4   1   80.79    7.60 
   0  -4   1   57.29    5.60 
   0  -4   1   62.39    7.10 
   0  -4   1   59.29    5.80 
   0  -4  -1   50.19    7.60 
   0   4   1   61.59    6.60 
   0   4  -1   58.69    6.90 
   0   4  -1   57.99    5.20 
   0   4   1   64.99    6.50 
   0   4  -1   65.39    6.20 
  -2  -4  -1   84.79    7.90 
   2  -4   1   83.59    7.60 
  -2   4  -1   93.79    9.90 
   2   4   1   87.99    8.00 
  -2   4  -1   82.29    8.20 
   2   4   1   86.69    8.00 
   4  -4   1   36.20    5.50 
   4  -4   1   37.10    5.70 
   4   4   1   38.70    5.40 
   4   4   1   39.90    5.20 
  -4   4  -1   52.99    6.30 
   4   4   1   39.40    5.90 
  -4   4  -1   44.70    7.50 
   6  -4   1   43.00    7.10 
   6  -4   1   37.20    6.30 
   6   4   1   40.60    6.90 
   6   4   1   36.20    6.50 
  -6   4  -1   46.10    6.60 
   6   4   1   44.30    5.90 
  -6   4  -1   62.09    8.90 
   8  -4   1   16.90    7.70 
   8  -4   1   19.90    5.80 
   8   4   1   17.20    6.00 
   8   4   1   11.60    6.80 
   8   4   1   11.50    6.30 
  -8   4  -1    8.90    7.70 
  -8   4  -1   18.20    8.50 
  10  -4   1   31.90    6.60 
  10  -4   1    5.10    7.90 
  10   4   1    4.50    5.60 
 -10   4  -1   15.60    8.70 
  10   4   1   10.80    7.40 
  10   4   1   15.80    6.80 
 -10   4  -1    0.70    5.70 
  12  -4   1   -0.30   16.60 
 -12  -4  -1    4.00    7.20 
  12   4   1  -13.60    7.60 
 -12   4  -1    4.60    6.40 
 -12   4  -1   -4.60    8.80 
 -14  -4  -1    4.20    6.90 
  14  -4   1    6.10    9.30 
 -14  -4  -1   -0.30    6.80 
 -14   4  -1    2.30    9.10 
 -14   4  -1    4.70    6.50 
  14   4   1   -2.40    8.50 
 -16  -4  -1   -7.00    7.50 
  16  -4   1    0.00   10.10 
 -16  -4  -1   -6.50    7.20 
 -16   4  -1   -1.70    8.70 
  16   4   1   -3.70    8.70 
  18  -4   1    5.90    9.60 
  18   4   1   -0.70   12.40 
 -17  -5   1  -16.30    7.10 
 -17  -5   1  -17.90    7.10 
  17  -5  -1    1.00    9.50 
 -17   5   1   -6.30    8.80 
  17   5  -1  -10.30    7.70 
 -15  -5   1    9.30    7.10 
 -15  -5   1    4.10    7.00 
  15  -5  -1    4.70    9.50 
  15   5  -1   -1.80    8.10 
 -15   5   1    1.10   10.50 
 -15   5   1   15.20    9.50 
 -13  -5   1   16.50    6.70 
  13  -5  -1   11.50    9.50 
 -13  -5   1    3.70    7.30 
  13   5  -1    5.70    8.20 
 -13   5   1    4.10    9.70 
 -13   5   1    3.10    7.60 
  11  -5  -1    3.90    8.20 
 -11   5   1  -10.70    8.50 
  11   5  -1    5.10    6.50 
  11   5  -1   -3.50    5.50 
 -11   5   1    1.50    6.80 
   9  -5  -1   12.70    7.60 
   9   5  -1    7.90    4.60 
   9   5  -1   18.90    6.60 
  -9   5   1   19.70    9.20 
  -9   5   1   13.40    6.90 
   9   5  -1   21.20    6.60 
   7  -5  -1   24.10    5.40 
   7  -5  -1    7.30    6.00 
  -7   5   1    8.20    7.90 
   7   5  -1    5.80    4.90 
   7   5  -1    7.40    5.30 
  -7   5   1    1.80    5.40 
   5  -5  -1   48.40    6.70 
  -5  -5   1   65.49    8.40 
   5  -5  -1   44.10    6.60 
   5   5  -1   71.09    8.80 
  -5   5   1   38.50    8.30 
  -5   5   1   43.20    6.90 
   5   5  -1   44.10    6.10 
   3  -5  -1    7.50    3.40 
  -3  -5   1    6.30    3.70 
  -3  -5   1    5.40    2.70 
   3  -5  -1    6.30    3.60 
   3   5  -1    3.10    3.50 
  -3   5   1    6.00    4.70 
  -3   5   1    7.70    5.50 
   3   5  -1    4.30    3.00 
   1  -5  -1   67.79    6.80 
  -1  -5   1   54.99    6.90 
  -1  -5   1   69.19    6.50 
   1  -5  -1   57.19    5.80 
  -1  -5   1   68.49    6.60 
   1   5  -1   76.89    8.50 
  -1   5   1   67.79    8.10 
   1   5  -1   71.19    6.70 
  -1   5   1   55.09    5.40 
  -1   5   1   64.59    6.90 
  -1  -5  -1    1.20    2.80 
   1  -5   1    3.10    2.80 
   1  -5   1    1.60    2.90 
   1   5   1    2.70    3.20 
  -1   5  -1   -2.80    3.10 
   1   5   1    3.00    3.10 
  -1   5  -1    1.60    4.10 
   3  -5   1   65.99    7.40 
   3  -5   1   69.89    7.60 
  -3   5  -1   55.39    8.00 
  -3   5  -1   63.89    7.90 
   3   5   1   72.39    8.20 
   3   5   1   67.49    7.90 
   5  -5   1    1.70    4.10 
   5  -5   1   12.90    5.10 
  -5   5  -1   11.90    5.30 
   5   5   1   15.60    4.50 
  -5   5  -1   14.50    6.90 
   5   5   1   16.90    5.00 
   5   5   1   16.50    4.20 
   7  -5   1   58.19    8.70 
   7  -5   1   64.89    8.10 
  -7   5  -1   77.29    8.70 
   7   5   1   75.69   10.60 
   7   5   1   57.69    8.90 
  -7   5  -1   62.29   10.20 
   7   5   1   60.39    7.50 
   9  -5   1    4.00    5.50 
   9  -5   1    9.90    7.20 
   9   5   1   10.40    6.10 
  -9   5  -1   -6.60    7.90 
   9   5   1   26.90    7.30 
   9   5   1    8.50    5.00 
  -9   5  -1    1.50    5.70 
  11  -5   1   35.40    7.40 
  11  -5   1   21.60    9.10 
 -11   5  -1   20.40    7.20 
  11   5   1   26.90    6.40 
  11   5   1   31.00    8.60 
 -11   5  -1   59.49   10.50 
  11   5   1   28.10    7.70 
 -13  -5  -1   14.50    7.40 
  13  -5   1    5.00    8.90 
 -13   5  -1   -4.10    6.40 
 -13   5  -1   -7.70    8.40 
 -15  -5  -1   10.50    7.60 
 -15  -5  -1   12.30    7.70 
  15  -5   1   11.10    9.70 
 -15   5  -1   15.40    9.40 
  15   5   1    5.20    8.30 
 -17  -5  -1   11.00    7.20 
  17   5   1    9.80    9.60 
 -17   5  -1    8.10    8.70 
 -16  -6   1    1.40    7.00 
  16  -6  -1   -0.80    8.70 
 -16   6   1   17.10    9.60 
  16   6  -1    1.20    7.90 
  14  -6  -1    6.90    9.10 
 -14  -6   1    7.60    7.80 
 -14   6   1   -0.20    7.40 
 -14   6   1   24.00   10.40 
  14   6  -1   21.60    8.50 
  12  -6  -1   13.00    8.70 
  12   6  -1   11.30    6.70 
 -12   6   1   10.30   11.40 
  12   6  -1    1.40    6.50 
 -12   6   1   -2.30    6.80 
  10  -6  -1   29.40    8.60 
  10   6  -1   27.80    7.80 
 -10   6   1   24.70    9.90 
 -10   6   1   31.50    8.10 
  10   6  -1   37.30    7.70 
   8  -6  -1   33.20    7.30 
   8  -6  -1   27.20    7.20 
  -8   6   1   24.40    7.50 
  -8   6   1   26.10    9.70 
   8   6  -1   30.00    6.90 
   8   6  -1   22.90    6.80 
   6  -6  -1   61.99    8.30 
   6  -6  -1   55.79    7.90 
   6   6  -1   77.89    8.10 
   6   6  -1   64.49    8.60 
  -6   6   1   50.29   10.00 
  -6   6   1   72.59    8.70 
   4  -6  -1   64.79    7.40 
   4  -6  -1   53.69    6.40 
  -4  -6   1   57.99    7.10 
   4   6  -1   47.90    5.40 
  -4   6   1   48.20    8.20 
   4   6  -1   52.69    6.00 
   4   6  -1   44.90    6.80 
  -4   6   1   48.70    7.30 
   2  -6  -1   77.09    8.20 
  -2  -6   1   89.99    8.70 
   2  -6  -1   88.89    8.00 
  -2   6   1   78.69   10.10 
  -2   6   1   94.49    9.80 
   2   6  -1   81.29    8.00 
   2   6  -1   92.39    9.00 
   0  -6   1   63.89    6.70 
   0  -6   1   57.39    6.70 
   0  -6  -1   52.09    6.80 
   0   6   1   61.09    7.90 
   0   6   1   60.59    8.00 
   0   6  -1   62.49   10.00 
   0   6  -1   67.89    8.00 
   2  -6   1   59.89    7.20 
   2  -6   1   62.89    7.10 
  -2   6  -1   56.29    7.40 
   2   6   1   62.49    8.40 
   2   6   1   74.79    8.30 
  -2   6  -1   56.49    6.90 
   4  -6   1   40.50    6.40 
   4  -6   1   59.79    6.80 
   4   6   1   46.40    6.20 
   4   6   1   40.90    6.90 
  -4   6  -1   42.70    8.10 
  -4   6  -1   48.30    7.00 
   6  -6   1   25.30    5.80 
   6  -6   1   23.10    6.10 
   6   6   1   17.90    4.90 
  -6   6  -1   33.80    6.80 
   6   6   1   23.60    5.60 
   6   6   1   24.60    6.30 
  -6   6  -1   26.40    8.20 
   8  -6   1   23.70    7.30 
   8  -6   1   24.90    6.10 
  -8   6  -1   30.60    8.50 
  -8   6  -1   19.90    9.00 
   8   6   1   13.30    5.20 
   8   6   1   18.80    6.60 
   8   6   1   24.00    7.00 
  10  -6   1   -3.00    7.20 
  10  -6   1    3.80    5.70 
 -10   6  -1    7.60    6.50 
  10   6   1    0.90    6.00 
 -10   6  -1   10.20    9.00 
  10   6   1    4.70    4.80 
  10   6   1   -4.30    6.30 
  12  -6   1   -8.00    7.90 
  12  -6   1  -18.80    8.70 
  12   6   1   -8.70    7.10 
 -12   6  -1    4.20    6.50 
  12   6   1    5.60    7.00 
 -12   6  -1   -1.60    8.70 
  14  -6   1   -2.80    8.70 
 -14  -6  -1    0.60    6.50 
 -14  -6  -1  -12.10    7.40 
  14   6   1   -3.70    7.90 
 -14   6  -1    8.70    9.60 
  16  -6   1    2.20    9.40 
 -16  -6  -1    6.10    6.70 
  16   6   1   -5.40    7.80 
 -16   6  -1   -5.30    8.80 
  17  -7  -1    8.70    9.50 
 -17  -7   1   13.00   13.60 
  17   7  -1   22.30    8.80 
 -15  -7   1   -1.00    7.70 
  15  -7  -1    0.50    8.50 
 -15   7   1    8.40   10.20 
 -15   7   1   18.90   11.60 
  15   7  -1   -7.10    7.20 
  13  -7  -1   19.70    9.20 
  13   7  -1   30.20    8.50 
  13   7  -1   17.80    8.00 
 -13   7   1   37.30    9.20 
 -13   7   1   22.50   11.20 
  11  -7  -1    7.90    7.80 
  11   7  -1   28.60    7.80 
 -11   7   1   21.50    7.70 
  11   7  -1   19.40    7.20 
   9  -7  -1   54.19    9.80 
   9   7  -1   94.49   11.50 
  -9   7   1   72.09   12.40 
   9   7  -1   84.29    9.90 
  -9   7   1   96.19   11.10 
   7  -7  -1   27.00    6.90 
   7  -7  -1   29.50    8.80 
   7   7  -1   27.20    7.00 
  -7   7   1   32.40    9.30 
  -7   7   1   15.90    7.00 
   7   7  -1   31.30    6.50 
   5  -7  -1  148.09   13.00 
   5  -7  -1  154.28   12.90 
   5   7  -1  144.99   13.00 
  -5   7   1  147.09   14.70 
   5   7  -1  162.08   13.90 
  -5   7   1  140.39   17.10 
   3  -7  -1   27.80    5.00 
   3  -7  -1   36.20    5.60 
  -3  -7   1   36.00    5.70 
  -3   7   1   36.40    7.20 
   3   7  -1   37.20    6.00 
   3   7  -1   23.70    4.60 
   3   7  -1   30.00    4.90 
  -3   7   1   22.60    6.10 
  -1  -7   1  188.38   13.70 
   1  -7  -1  179.48   13.80 
  -1  -7   1  188.08   14.10 
  -1   7   1  179.78   14.90 
   1   7  -1  189.88   14.40 
   1   7  -1  189.68   14.20 
   1  -7   1   10.00    3.90 
   1  -7   1   14.40    3.90 
  -1   7  -1   15.30    5.40 
   1   7   1   16.40    4.80 
   1   7   1    7.10    4.30 
  -1   7  -1   17.50    4.70 
   3  -7   1  146.59   12.50 
   3  -7   1  153.78   12.50 
   3   7   1  154.58   13.10 
  -3   7  -1  149.39   14.80 
  -3   7  -1  145.79   18.30 
   3   7   1  149.88   13.20 
   5  -7   1    6.20    4.80 
   5  -7   1   14.80    4.60 
   5   7   1   -0.80    4.40 
   5   7   1    0.10    4.50 
  -5   7  -1    3.80    7.30 
  -5   7  -1   20.20   10.50 
   7  -7   1   73.59    9.40 
   7  -7   1   69.49    9.10 
  -7   7  -1   83.39   10.00 
   7   7   1   71.19    8.50 
  -7   7  -1   68.99   10.80 
   7   7   1   63.19    7.90 
   7   7   1   72.09    9.50 
   9  -7   1   -1.00    6.70 
   9  -7   1    3.80    5.40 
   9   7   1    3.10    5.60 
  -9   7  -1    8.80    8.40 
  -9   7  -1   -7.50    5.90 
   9   7   1    1.00    4.60 
   9   7   1   -8.80    5.40 
  11  -7   1    7.70   12.30 
  11  -7   1   20.20    8.70 
 -11   7  -1   17.70    9.30 
  11   7   1   25.80    6.10 
 -11   7  -1   27.50    7.90 
  11   7   1   20.90    7.60 
  11   7   1   37.00    8.20 
  13  -7   1    1.00    8.50 
  13   7   1    6.10    8.50 
  13   7   1    9.70    7.80 
 -13   7  -1   21.10    7.40 
 -13   7  -1    1.00    8.90 
 -15  -7  -1    7.10    6.70 
 -15  -7  -1    4.20    7.70 
  15  -7   1    3.20    9.10 
  15   7   1   -4.10    7.70 
 -15   7  -1   -6.00    8.90 
  16  -8  -1   14.20   16.30 
 -16   8   1    2.90    9.90 
  16   8  -1  -11.30    7.20 
  14  -8  -1   11.40    8.70 
 -14   8   1    9.30   10.40 
  14   8  -1   11.90    7.80 
 -14   8   1    7.70    9.90 
  14   8  -1   10.30    6.80 
  12  -8  -1   -3.10    7.50 
  12   8  -1    5.50    6.70 
  12   8  -1  -10.70    6.40 
 -12   8   1   -9.00    9.50 
 -12   8   1    2.60    7.60 
  10  -8  -1   18.40    7.60 
  10   8  -1   10.40    6.60 
  10   8  -1    8.60    6.10 
 -10   8   1   11.10    7.30 
   8  -8  -1   -2.80    5.70 
  -8   8   1    5.50    8.60 
   8   8  -1   -7.00    5.30 
   8   8  -1  -12.00    9.70 
  -8   8   1    6.70    7.20 
   6  -8  -1    7.40    5.60 
   6   8  -1   23.80    5.60 
  -6   8   1   14.70    9.20 
   6   8  -1   19.90    6.30 
  -6   8   1   19.30    7.30 
   4  -8  -1   -0.70    4.40 
   4   8  -1    0.10    4.10 
  -4   8   1    2.70    6.10 
   4   8  -1    0.10    4.00 
   4   8  -1    4.90    4.70 
  -4   8   1    3.20    7.30 
  -2  -8   1   33.40    5.70 
   2  -8  -1   27.50    5.00 
   2   8  -1   24.00    5.00 
  -2   8   1   27.20    6.60 
   2   8  -1   27.50    5.90 
  -2   8   1   25.60    6.60 
   0  -8  -1    6.50    3.60 
   0  -8   1   -6.50    4.20 
   0  -8   1    1.30    3.90 
   0   8   1    1.40    4.90 
   0   8  -1    3.40    4.40 
   0   8   1    8.10    5.00 
   2  -8   1   33.20    5.40 
   2  -8   1   23.00    4.90 
   2   8   1   23.00    5.70 
   2   8   1   23.80    5.80 
  -2   8  -1   11.30    5.60 
  -2   8  -1   22.90    7.10 
   4  -8   1   -6.80    4.00 
   4  -8   1    1.20    5.10 
   4   8   1    6.20    5.00 
  -4   8  -1   -7.60    7.20 
  -4   8  -1   11.40    6.00 
   4   8   1    1.50    4.90 
   6  -8   1   21.40    6.30 
   6  -8   1   -0.90    4.90 
  -6   8  -1    4.20    8.30 
   6   8   1   21.60    6.20 
  -6   8  -1    0.50    6.30 
   6   8   1   21.30    5.50 
   6   8   1    4.20    5.10 
   8  -8   1    7.20    6.60 
   8  -8   1    0.90    5.70 
  -8   8  -1  -11.60    6.10 
  -8   8  -1   -8.80    8.60 
   8   8   1    3.40    4.90 
   8   8   1    5.60    5.90 
   8   8   1   -3.30    5.30 
  10  -8   1    4.30    7.40 
  10   8   1    7.80    6.30 
 -10   8  -1   11.10    9.30 
  10   8   1    7.30    5.00 
 -10   8  -1    8.20    7.20 
  10   8   1    5.80    6.70 
  12  -8   1    7.20    8.30 
  12   8   1   -1.50    6.60 
 -12   8  -1   -1.60    7.00 
  12   8   1   -9.10    7.20 
 -12   8  -1    6.40    9.40 
  12   8   1    0.20    5.10 
  14  -8   1    0.90    8.40 
 -14   8  -1   -1.00    9.30 
  14   8   1   11.90    8.00 
  14   8   1    7.80    6.80 
 -16  -8  -1    4.30    6.50 
  16  -8   1    3.70    8.80 
  16   8   1    4.60    8.00 
 -16   8  -1   -0.80   10.80 
  15  -9  -1   -0.60    8.20 
 -15   9   1   14.00   10.40 
  15   9  -1    3.10    7.20 
  13  -9  -1    3.10    7.90 
 -13   9   1   12.20   10.40 
  13   9  -1    5.00    6.80 
  13   9  -1   -5.50    6.10 
 -13   9   1    7.30    7.90 
  11  -9  -1    8.50    7.20 
 -11   9   1   15.10    7.70 
 -11   9   1    9.50   10.30 
  11   9  -1    0.80    6.70 
   9  -9  -1    9.70    6.50 
   9   9  -1   10.30    6.40 
  -9   9   1    2.90   14.90 
  -9   9   1   30.30    8.00 
   9   9  -1    8.10    5.90 
   7  -9  -1    4.90    5.50 
   7   9  -1    2.50    5.20 
   7   9  -1   -3.10    5.10 
  -7   9   1    9.40    7.30 
  -7   9   1   11.10    9.40 
   5  -9  -1   31.30    6.30 
   5   9  -1   32.80    7.00 
  -5   9   1   24.00    7.60 
  -5   9   1   27.10    8.90 
   5   9  -1   37.20    6.20 
   3  -9  -1    5.30    4.40 
   3   9  -1    6.90    4.80 
  -3   9   1    6.80    6.80 
  -3   9   1    2.70    6.30 
   3   9  -1    2.80    4.10 
   1  -9  -1   43.10    5.80 
  -1  -9   1   49.70    6.80 
   1   9  -1   49.70    6.80 
  -1   9   1   48.00    7.50 
  -1   9   1   46.50    7.70 
   1   9  -1   47.30    7.10 
   1  -9   1    6.10    5.90 
   1  -9   1    1.30    4.40 
   1   9   1    4.90    5.10 
  -1   9  -1    8.60    6.30 
  -1   9  -1    5.40    5.30 
   1   9   1    3.20    5.40 
   3  -9   1   53.49    7.20 
   3  -9   1   73.59    8.70 
   3   9   1   48.80    7.10 
  -3   9  -1   45.10    8.80 
  -3   9  -1   41.20    7.80 
   3   9   1   41.00    7.50 
   5  -9   1   12.20    5.10 
   5  -9   1   11.60    5.60 
  -5   9  -1    2.30    5.70 
   5   9   1   -0.80    4.70 
   5   9   1   10.90    5.30 
  -5   9  -1    1.30    7.70 
   7  -9   1   31.20    7.50 
   7  -9   1   35.50    7.20 
   7   9   1   34.10    7.70 
   7   9   1   34.30    6.60 
  -7   9  -1   41.00   10.20 
   7   9   1   37.30    6.40 
  -7   9  -1   26.20    7.80 
   9  -9   1   -7.40   11.60 
   9  -9   1    4.50    8.10 
   9   9   1    1.90    4.70 
  -9   9  -1    4.70    6.40 
   9   9   1    1.30    5.70 
   9   9   1   -2.10    5.40 
  -9   9  -1   -2.00    9.10 
  11  -9   1   20.70    8.40 
  11   9   1   12.10    7.00 
 -11   9  -1   18.90    9.80 
 -11   9  -1   23.10    7.60 
  11   9   1   24.80    5.50 
  11   9   1    6.30    6.80 
  13  -9   1    1.10    8.00 
 -13   9  -1   -2.20    9.50 
  13   9   1   -0.50    6.60 
  13   9   1   -0.40    7.30 
  15  -9   1  -10.10   14.00 
 -15  -9  -1    0.70    6.30 
  15   9   1    3.10    6.60 
  15   9   1    5.90    7.30 
  14 -10  -1    7.60    8.10 
  14  10  -1    7.80    7.20 
  14  10  -1   11.70    7.00 
 -14  10   1   15.00   10.70 
  12 -10  -1    3.00    7.30 
 -12  10   1   -2.20    9.90 
  12  10  -1   -4.60    6.30 
  12  10  -1    8.20    6.40 
 -12  10   1   -4.10    7.70 
  10 -10  -1   15.60    7.40 
  10  10  -1   16.70    6.60 
  10  10  -1   10.10    6.30 
 -10  10   1   14.40    8.20 
 -10  10   1   14.30   10.70 
   8 -10  -1    4.70    6.40 
   8  10  -1   -2.80    5.20 
   8  10  -1    5.80    5.50 
  -8  10   1   -3.10    7.20 
  -8  10   1   -3.00    9.50 
   6 -10  -1   21.50    6.60 
   6  10  -1   16.90    5.80 
  -6  10   1   10.30    7.50 
   6  10  -1   26.70    6.70 
  -6  10   1   26.30    9.50 
   4 -10  -1    2.70    4.80 
   4  10  -1   -1.10    4.80 
  -4  10   1    6.80    7.20 
  -4  10   1   -0.70    7.80 
   4  10  -1    4.00    5.00 
   4  10  -1    5.00    4.70 
   2 -10  -1   21.30    5.00 
   2  10  -1   12.70    4.60 
   2  10  -1   21.80    5.90 
   2  10  -1   12.00    5.60 
  -2  10   1   22.30    7.10 
  -2  10   1   14.50    7.10 
   0 -10   1    3.20    4.80 
   0 -10  -1    3.50    4.00 
   0 -10   1    9.70    4.50 
   0  10   1   -1.30    6.00 
   0  10  -1    0.00    5.90 
   0  10   1   -7.60    4.90 
   0  10  -1   -0.60    5.10 
   2 -10   1   11.20    4.60 
   2 -10   1    4.10    5.00 
  -2  10  -1   -0.80    6.90 
   2  10   1    8.60    5.50 
  -2  10  -1    7.80    5.60 
   2  10   1    3.70    5.60 
   4 -10   1   -3.40    5.50 
   4 -10   1    4.30    5.60 
   4  10   1   -2.90    5.00 
  -4  10  -1    8.40    5.90 
   4  10   1    2.00    5.40 
  -4  10  -1   -7.60    7.20 
   6 -10   1   -7.70    5.30 
  -6  10  -1   -0.20    6.10 
   6  10   1    9.70    5.30 
   6  10   1    0.30    5.20 
  -6  10  -1   -4.50    8.20 
   8 -10   1   -9.90    6.20 
   8 -10   1    2.40    7.20 
   8  10   1    0.10    5.20 
  -8  10  -1    7.50    9.20 
   8  10   1   -2.20    4.90 
  -8  10  -1    0.90    7.10 
   8  10   1    7.30    5.80 
  10 -10   1   16.40    7.70 
 -10  10  -1    9.00    9.50 
 -10  10  -1   -1.90    6.90 
  10  10   1    5.10    6.20 
  10  10   1    5.90    4.90 
  10  10   1    4.20    6.30 
  12 -10   1   -1.40    7.80 
  12  10   1   -2.70    4.60 
  12  10   1    3.50    6.80 
 -12  10  -1   -1.70    9.40 
  12  10   1   11.30    6.60 
  14 -10   1   -3.30    7.70 
  14  10   1    0.00    6.90 
 -14  10  -1    2.40    9.70 
  14  10   1   -1.10    6.20 
  13 -11  -1    1.30    7.50 
 -13  11   1   10.00   11.00 
  13  11  -1   13.10    7.00 
  13  11  -1    6.30    6.50 
  11 -11  -1   -5.10    6.80 
 -11  11   1   -6.90   10.70 
  11  11  -1   -0.10    6.10 
 -11  11   1  -13.90    7.90 
  11  11  -1   10.20    6.40 
   9 -11  -1   22.70    7.50 
   9  11  -1   30.80    7.20 
   9  11  -1   19.80    7.30 
  -9  11   1   22.20    8.70 
  -9  11   1   28.70   11.00 
   7 -11  -1   -2.90    5.70 
  -7  11   1    4.60    7.40 
   7  11  -1    3.00    5.40 
  -7  11   1    0.60    9.40 
   7  11  -1   -8.60    4.80 
   5 -11  -1   49.99    7.60 
   5  11  -1   54.49    7.40 
   5  11  -1   46.30    6.90 
   5  11  -1   38.10    7.90 
  -5  11   1   40.30   10.10 
  -5  11   1   45.40    9.50 
   3 -11  -1   -0.10    4.50 
  -3  11   1    5.30    7.60 
   3  11  -1   -7.50    4.90 
   3  11  -1    1.40    4.80 
  -3  11   1    7.10    7.00 
   3  11  -1    3.90    5.40 
  -1  11   1   36.00    8.00 
   1  11  -1   51.59    7.60 
   1  11  -1   36.40    7.40 
  -1  11   1   26.80    7.40 
   1 -11   1    3.50    5.00 
   1 -11   1  -11.30    4.20 
   1  11   1   -1.30    6.10 
  -1  11  -1    4.40    5.80 
  -1  11  -1    0.10    6.50 
   1  11   1    1.50    5.40 
   3 -11   1   34.80    6.60 
   3 -11   1   30.80    6.70 
   3  11   1   28.50    6.70 
  -3  11  -1   28.10    7.30 
  -3  11  -1    9.90    8.00 
   3  11   1   27.30    7.30 
   5 -11   1    1.80    5.70 
   5 -11   1   12.40    6.60 
  -5  11  -1    1.40    8.20 
   5  11   1    4.70    5.40 
  -5  11  -1    8.50    6.80 
   5  11   1    5.50    5.50 
   7 -11   1   23.20   10.70 
   7 -11   1   12.10    8.00 
   7  11   1   14.20    6.50 
  -7  11  -1   11.10    6.70 
   7  11   1    8.80    5.40 
   7  11   1   15.30    6.20 
  -7  11  -1    3.40    9.10 
   9 -11   1    2.80    6.90 
  -9  11  -1   -6.10    6.90 
  -9  11  -1    5.70    9.80 
   9  11   1    4.70    5.60 
   9  11   1    5.90    6.20 
   9  11   1    4.00    5.10 
  11 -11   1    4.60    7.60 
  11  11   1   -4.20   11.00 
 -11  11  -1   -6.30    9.70 
  11  11   1   -1.40    4.50 
  11  11   1   -9.50    8.00 
  13 -11   1    4.20    8.10 
 -13  11  -1    6.80   10.30 
  13  11   1   -0.60    6.80 
  13  11   1    2.70    5.90 
  13  11   1  -10.80    5.60 
  12 -12  -1   -4.60    7.20 
  12  12  -1   -0.60    6.10 
 -12  12   1   -7.10   10.10 
  10 -12  -1   -0.80    6.80 
  10  12  -1    0.90    5.80 
  10  12  -1   -1.40    5.70 
 -10  12   1   -1.70   11.90 
 -10  12   1   -9.50   10.20 
   8 -12  -1    0.10    6.30 
  -8  12   1   -2.40    7.60 
  -8  12   1    7.20   10.40 
   8  12  -1    7.00    6.00 
   8  12  -1    8.90    6.10 
   6 -12  -1    2.80    5.80 
   6  12  -1   -7.70    4.70 
   6  12  -1   -0.30    5.40 
  -6  12   1    1.70    7.50 
  -6  12   1   -6.80    8.50 
   4 -12  -1    4.30    5.60 
   4  12  -1    9.60    5.70 
   4  12  -1    1.30    5.40 
   4  12  -1   -8.50    4.80 
  -4  12   1   -2.80    7.10 
   2 -12  -1   -1.20    4.90 
   2  12  -1    4.20    5.40 
   2  12  -1   -8.60    5.70 
  -2  12   1    1.60    6.80 
   2  12  -1    6.40    5.10 
  -2  12   1    7.10    7.50 
   0  12   1    4.40    7.00 
   0  12  -1    1.50    6.70 
   0  12  -1   -0.80    5.50 
   2 -12   1    4.30    5.50 
   2  12   1   -1.70    5.60 
   2  12   1  -10.60    6.10 
  -2  12  -1    4.90    7.40 
  -2  12  -1   -4.90    6.10 
   4 -12   1   -1.90    5.70 
   4 -12   1    2.50    6.20 
   4  12   1   -3.40    5.40 
   4  12   1   -7.30    5.60 
  -4  12  -1   -5.20    6.40 
  -4  12  -1    5.50    8.60 
  -6  12  -1    2.20    8.90 
  -6  12  -1   -3.70    6.60 
   6  12   1    3.10    5.60 
   6  12   1   -6.20    5.60 
   8 -12   1   -4.70    6.80 
   8  12   1   -3.70    5.40 
  -8  12  -1    0.20    9.70 
   8  12   1    1.30    5.30 
  -8  12  -1   -3.80    6.80 
  10 -12   1   -6.10    7.00 
  10  12   1  -10.40   11.20 
 -10  12  -1    1.60   10.50 
  10  12   1    5.00    7.30 
  10  12   1   -6.40    4.60 
  12 -12   1    0.10    7.90 
  12  12   1    3.70    6.40 
  12  12   1  -11.40    6.10 
 -12  12  -1    0.90   10.50 
  12  12   1  -12.10    5.40 
  11 -13  -1    6.00    7.10 
  11  13  -1    5.60   11.80 
 -11  13   1   -5.30   10.60 
  11  13  -1    5.10    5.90 
   9 -13  -1    4.00    6.70 
  -9  13   1   -2.10    7.60 
   9  13  -1   -1.20    5.70 
  -9  13   1    1.90   10.30 
   7 -13  -1    6.70    6.40 
  -7  13   1    6.60    9.70 
   7  13  -1   14.70    6.30 
  -7  13   1    9.70   13.00 
   7  13  -1    6.10    6.20 
   5 -13  -1   -0.90    5.50 
   5  13  -1   -4.40    5.10 
  -5  13   1   -4.90   13.00 
   5  13  -1    8.00    5.40 
   5  13  -1    7.60    5.60 
  -5  13   1    1.30    8.70 
   3 -13  -1   15.60    5.70 
   3  13  -1    1.10    5.50 
   3  13  -1   17.50    6.20 
  -3  13   1   14.60    8.30 
   3  13  -1    8.50    6.50 
  -3  13   1   20.20   11.90 
   1  13  -1    6.00    6.60 
   1  13  -1    2.00    4.80 
  -1  13   1   12.60    8.80 
  -1  13   1    0.50    6.70 
   1  13  -1    1.40    6.00 
   1 -13   1   14.00    6.00 
   1  13   1   24.50    7.80 
  -1  13  -1   16.00    7.00 
  -1  13  -1    8.60    7.40 
   1  13   1    6.90    6.50 
   3 -13   1    1.30    5.60 
   3  13   1    8.90    6.70 
   3  13   1    2.60    5.80 
  -3  13  -1   11.70    9.00 
  -3  13  -1    6.50    6.70 
   5 -13   1   25.30    7.00 
  -5  13  -1   12.00    7.00 
   5  13   1   16.80    6.50 
   5  13   1    8.70    6.10 
  -5  13  -1   -4.80    8.90 
   7 -13   1    0.80    6.70 
   7  13   1   13.00    6.10 
  -7  13  -1    4.20    9.50 
  -7  13  -1    6.00   14.40 
   7  13   1    8.20    6.10 
   9 -13   1    5.90    7.10 
  -9  13  -1   12.90   10.30 
   9  13   1    1.30    6.90 
   9  13   1    6.50    5.70 
  11 -13   1   -0.80    7.20 
  11  13   1    2.20    4.70 
 -11  13  -1   15.60   13.70 
  11  13   1    4.80    6.20 
  10 -14  -1   11.10    7.00 
  10  14  -1    9.10    6.20 
  10  14  -1   13.30    7.30 
   8 -14  -1    3.30    6.30 
  -8  14   1  -11.00    9.40 
   8  14  -1    6.20    5.70 
   8  14  -1    7.90    6.20 
   6 -14  -1    0.80    5.90 
   6  14  -1    7.50    6.00 
  -6  14   1    1.50    7.50 
  -6  14   1    4.10    9.20 
   6  14  -1    1.50    6.10 
   6  14  -1    7.80    5.20 
   4 -14  -1   -4.40    5.30 
   4  14  -1   -2.00    5.80 
  -4  14   1    0.40    8.40 
   4  14  -1   -6.20    5.30 
  -4  14   1   -3.40    7.50 
   4  14  -1    4.10    5.70 
   2 -14  -1    8.50    5.30 
   2  14  -1    4.30    5.50 
  -2  14   1    2.60    8.00 
   2  14  -1    1.90    6.60 
   2  14  -1  -10.50    6.60 
  -2  14   1    6.80    7.50 
   0  14   1   -5.80    7.10 
   0  14  -1    2.80    6.00 
   0  14   1    0.40    6.40 
   2  14   1   -1.00    6.00 
  -2  14  -1   14.00    7.60 
   2  14   1    2.40    7.10 
  -2  14  -1    2.70    7.80 
   4 -14   1   -1.30    5.70 
   4  14   1    5.20    6.00 
  -4  14  -1    3.20    8.70 
  -4  14  -1    5.80    7.10 
   6 -14   1    5.10    6.60 
   6  14   1    2.20    5.70 
   6  14   1  -11.70    7.20 
  -6  14  -1   -4.10    8.90 
   8 -14   1   -7.20    6.60 
  -8  14  -1  -13.70    9.40 
   8  14   1    1.20    5.20 
  10 -14   1    6.00    7.40 
  10  14   1    9.00    6.10 
 -10  14  -1    5.50   16.10 
   9 -15  -1   -1.10    6.40 
   9  15  -1    8.50    5.90 
  -9  15   1   -4.20   10.00 
   7 -15  -1   -2.50    6.00 
   7  15  -1    5.70    5.70 
   7  15  -1   12.70    6.20 
  -7  15   1   11.90   10.00 
   5 -15  -1    8.80    5.80 
   5  15  -1    4.20    5.90 
   5  15  -1   16.70    6.50 
   5  15  -1   11.60    6.00 
  -5  15   1    2.20    9.30 
  -5  15   1    4.80    7.50 
   3  15  -1    3.30    5.90 
   3  15  -1    0.30    7.50 
  -3  15   1    5.40    7.80 
  -3  15   1    9.60    8.90 
   3  15  -1    4.80    5.80 
   1  15  -1    4.00    7.10 
  -1  15   1    0.50    6.80 
   1  15  -1   12.80    6.90 
  -1  15   1    1.80    8.00 
   1  15  -1   -0.60    5.50 
  -1  15  -1    2.60    7.90 
   1  15   1    6.00    6.80 
   1  15   1    3.70    7.60 
  -1  15  -1    5.60    6.70 
   3 -15   1    6.00    6.50 
   3  15   1   -9.70    6.50 
  -3  15  -1  -17.20    7.80 
   3  15   1   -1.40    5.90 
   5 -15   1    6.70    6.40 
   5  15   1   17.50    6.40 
  -5  15  -1  -13.60    8.50 
   5  15   1   -4.10    5.70 
   7 -15   1   -2.90    6.60 
   7  15   1   -3.30    6.20 
   7  15   1    8.20    5.90 
  -7  15  -1   11.00    9.70 
   9 -15   1   18.60    7.80 
   9  15   1    6.50    6.20 
   9  15   1    2.70    5.10 
  -9  15  -1    9.80   10.10 
   6 -16  -1   -0.80    5.50 
  -6  16   1   -3.70    9.80 
   6  16  -1    4.00    6.00 
   4 -16  -1    5.20    5.80 
  -4  16   1   -0.70    8.80 
   4  16  -1    2.40    5.80 
   4  16  -1    0.10    6.00 
  -2  16   1  -11.30    6.30 
   2  16  -1    0.10    5.80 
   2  16  -1   -1.50    6.50 
  -2  16   1    1.30    8.40 
   0  16   1    0.30    6.30 
   0  16  -1    6.90    6.00 
   0  16  -1  -11.30    7.00 
   0  16   1   -7.50    7.60 
  -2  16  -1  -12.90    7.80 
   2  16   1   15.00    7.10 
   2  16   1    0.90    7.10 
   4 -16   1   -5.00    6.20 
   4  16   1   -4.50    6.30 
   4  16   1   -4.30    6.30 
  -4  16  -1    7.00    8.80 
   6 -16   1   -4.80    6.10 
   6  16   1    0.00    5.80 
  -6  16  -1   -0.20    9.20 
   6  16   1   10.30    5.80 
   3  17  -1   11.80    6.00 
   3  17  -1   -5.60    6.00 
  -3  17   1    6.70    8.90 
   1  17  -1   12.00    6.30 
   1  17  -1    4.20    7.10 
  -1  17   1   -4.60    8.00 
   1  17   1  -18.00   12.10 
   1  17   1    3.50    7.70 
  -1  17  -1   -7.20    5.60 
  -1  17  -1    0.10    7.60 
   3  17   1    3.50    6.70 
  -3  17  -1    4.20    8.20 
 -18   0   2   12.20    7.90 
 -18   0   2   20.00    8.00 
  18   0  -2   14.50   10.20 
 -16   0   2   14.30    8.40 
  16   0  -2   41.30   10.80 
 -16   0   2   44.80   11.10 
 -14   0   2   47.90   10.30 
 -14   0   2   43.50    9.10 
  14   0  -2   39.40   10.40 
  12   0  -2  170.78   18.90 
 -12   0   2  196.28   20.00 
 -12   0   2  190.58   17.70 
  10   0  -2  132.99   15.10 
 -10   0   2  131.29   14.50 
 -10   0   2  133.69   17.20 
   8   0  -2  704.63   44.30 
  -8   0   2  682.13   43.70 
  -8   0   2  632.34   44.20 
  -6   0   2  291.57   21.40 
  -6   0   2  310.47   21.30 
  -6   0   2  302.37   22.20 
   6   0  -2  327.07   21.90 
  -4   0   2 1256.17   84.99 
  -4   0   2 1425.26   85.39 
   4   0  -2 1503.75   85.59 
   2   0  -2  545.55   34.60 
  -2   0   2  520.25   34.50 
   2   0  -2  585.84   34.10 
   2   0  -2  583.84   34.60 
  -2   0   2  579.94   34.60 
  -2   0   2  541.05   34.50 
   0   0   2 2262.67  125.79 
   0   0  -2 1959.10  125.39 
   0   0  -2 1930.21  125.59 
   0   0   2 2163.48  125.59 
  -2   0  -2  422.66   28.70 
  -2   0  -2  451.15   28.30 
  -2   0  -2  484.85   28.40 
   2   0   2  431.86   28.70 
   2   0   2  483.95   28.40 
   4   0   2 2355.36  132.29 
   4   0   2 2073.79  131.89 
  -4   0  -2 2068.09  131.49 
  -6   0  -2  149.99   12.40 
   6   0   2  162.38   15.30 
   8   0   2 1067.19   67.69 
  -8   0  -2 1040.60   66.19 
  -8   0  -2 1031.70   65.49 
 -10   0  -2   40.40    8.40 
 -10   0  -2   60.09   11.50 
  10   0   2   50.09   11.20 
 -12   0  -2  373.46   27.70 
  12   0   2  333.87   30.70 
 -12   0  -2  364.06   26.00 
 -14   0  -2   -3.30    5.50 
 -14   0  -2   -3.90    7.60 
  14   0   2   17.60   11.40 
 -16   0  -2   89.09   12.30 
  16   0   2   87.69   15.10 
 -18   0  -2   -2.60    7.60 
  18   0   2   11.90   12.30 
  17  -1  -2   28.80   10.60 
 -17  -1   2   17.40    8.80 
 -17  -1   2   33.30    8.90 
  17   1  -2   19.80   10.20 
 -17   1   2   43.90    8.90 
 -17   1   2   39.00    9.50 
  15  -1  -2    7.30    9.00 
 -15  -1   2    0.30    7.60 
 -15  -1   2   -2.50    6.90 
  15   1  -2   -1.60    8.50 
 -15   1   2   -1.00    6.70 
 -15   1   2    8.80    8.70 
  13  -1  -2  110.59   14.90 
 -13  -1   2  128.29   17.00 
 -13  -1   2  119.79   15.00 
 -13   1   2  128.49   14.30 
  13   1  -2  139.39   17.00 
 -11  -1   2    1.50    6.10 
  11  -1  -2    5.80    7.50 
 -11  -1   2   -3.90    7.50 
  11   1  -2   -5.20    6.10 
 -11   1   2    1.30    6.60 
 -11   1   2   -0.20    8.20 
   9  -1  -2  353.66   26.50 
  -9  -1   2  362.16   25.60 
  -9  -1   2  354.56   26.20 
  -9   1   2  375.06   25.70 
   9   1  -2  339.57   25.80 
  -9   1   2  316.07   27.30 
  -7  -1   2    5.90    4.20 
  -7  -1   2   12.90    5.30 
  -7  -1   2   20.80    5.90 
  -7   1   2    9.00    7.00 
  -7   1   2    0.30    4.60 
   5  -1  -2  666.53   40.80 
  -5  -1   2  650.83   40.60 
   5  -1  -2  639.84   40.30 
  -5  -1   2  626.84   40.50 
   5   1  -2  666.23   40.50 
  -5   1   2  636.14   40.40 
  -5   1   2  565.74   40.40 
  -3  -1   2   58.69    5.80 
   3  -1  -2   52.29    6.90 
  -3  -1   2   57.99    6.20 
   3  -1  -2   56.19    6.40 
   3  -1  -2   63.19    6.00 
   3   1  -2   63.49    6.40 
  -3   1   2   52.99    6.60 
  -3   1   2   52.49    6.10 
  -3   1   2   55.99    6.00 
   3   1  -2   48.70    6.50 
   1  -1  -2  861.91   54.59 
   1  -1  -2  833.72   54.69 
  -1   1   2  861.61   54.69 
   1   1  -2  988.80   54.69 
   1   1  -2 1000.30   54.69 
  -1   1   2  841.82   54.69 
   1  -1   2  109.49    8.50 
   1  -1   2  121.29    7.90 
  -1   1  -2  105.69    8.30 
   1   1   2  117.69    7.90 
   1   1   2  111.89    8.50 
  -1   1  -2  123.19    7.80 
   3  -1   2  567.54   33.00 
  -3  -1  -2  518.85   33.40 
  -3  -1  -2  478.75   32.50 
  -3  -1  -2  512.45   32.90 
   3   1   2  540.15   33.10 
  -3   1  -2  509.15   32.70 
   3   1   2  499.55   32.90 
  -3   1  -2  518.35   32.40 
   3   1   2  541.55   32.80 
   5  -1   2  115.39   11.30 
   5   1   2  105.59    9.80 
   5   1   2   86.59   11.30 
  -5   1  -2  106.69    9.20 
   5   1   2  103.19    9.80 
   7  -1   2  163.48   16.40 
  -7   1  -2  157.28   14.30 
  -7   1  -2  150.98   12.80 
   7   1   2  124.39   15.80 
  -9  -1  -2   67.79   12.30 
   9  -1   2   73.89   12.00 
  -9   1  -2   55.89    8.10 
   9   1   2   78.19   12.30 
  -9   1  -2   69.49    9.60 
 -11  -1  -2   47.00    7.50 
 -11  -1  -2   37.60    8.60 
  11  -1   2   35.50   11.30 
  11   1   2   37.50   11.20 
 -11   1  -2   36.50    9.90 
 -11   1  -2   44.00    8.90 
 -13  -1  -2   39.00    8.70 
  13  -1   2   29.50   11.70 
 -13  -1  -2   42.50    8.00 
  13   1   2   25.10   14.70 
 -13   1  -2   34.30    8.20 
 -13   1  -2   32.50    9.50 
  15  -1   2    4.40   11.10 
 -15  -1  -2    2.90    6.10 
 -15  -1  -2   -4.30    7.70 
  15   1   2   19.50   11.60 
 -15   1  -2   -5.50    8.10 
  17  -1   2   12.00   11.60 
 -17  -1  -2   19.10    8.20 
 -17   1  -2   11.40    8.40 
  17   1   2   11.90   11.00 
 -18  -2   2    1.40    7.30 
 -18  -2   2    7.10    7.20 
 -18   2   2    7.00    7.50 
  18   2  -2    5.00   11.50 
 -16  -2   2    3.20    7.90 
 -16  -2   2    3.90    6.90 
  16  -2  -2   -9.40    8.90 
 -16   2   2   -5.80    6.90 
  16   2  -2    5.30    8.70 
 -16   2   2    2.80    8.50 
  14  -2  -2    5.70    9.20 
 -14  -2   2    5.60    7.00 
 -14  -2   2   -6.70    7.50 
 -14   2   2  -13.20    8.30 
 -14   2   2   -7.80    6.40 
  14   2  -2    6.10    8.10 
  12  -2  -2    9.70    8.10 
 -12  -2   2   17.40    7.90 
 -12  -2   2   15.70    8.80 
 -12   2   2    5.30    6.90 
 -12   2   2   19.70    9.80 
  12   2  -2   25.70    8.10 
 -10  -2   2   22.50    7.10 
 -10  -2   2   11.30    7.00 
  10  -2  -2    5.70    7.20 
 -10   2   2    8.60    8.90 
  10   2  -2   16.50    6.90 
 -10   2   2    8.00    6.40 
   8  -2  -2   60.59    9.20 
  -8  -2   2   60.19    8.50 
  -8  -2   2   63.09    8.20 
   8   2  -2   67.89    8.70 
  -8   2   2   58.49    8.00 
  -8   2   2   75.09   19.20 
   6  -2  -2  166.38   15.10 
  -6  -2   2  180.38   14.30 
   6  -2  -2  154.78   13.50 
  -6   2   2  173.28   14.10 
   6   2  -2  202.48   14.70 
   6   2  -2  185.28   14.40 
  -6   2   2  172.48   16.00 
   4  -2  -2  207.88   15.10 
  -4  -2   2  221.08   15.00 
   4  -2  -2  194.78   14.60 
  -4   2   2  211.88   15.60 
   4   2  -2  205.38   14.60 
  -4   2   2  182.58   14.60 
   2  -2  -2  853.31   53.09 
   2  -2  -2  815.92   53.89 
   2  -2  -2  867.81   53.09 
  -2   2   2  893.31   53.19 
   2   2  -2  924.01   53.09 
  -2   2   2  828.62   53.29 
   2   2  -2  946.61   53.49 
  -2   2   2  794.42   53.09 
   0  -2  -2  433.16   27.90 
   0  -2   2  436.06   27.60 
   0  -2  -2  389.26   27.90 
   0   2  -2  465.95   27.70 
   0   2  -2  497.15   27.90 
   0   2   2  453.45   28.00 
   0   2   2  450.85   27.70 
  -2  -2  -2 1003.20   61.29 
   2  -2   2 1098.29   61.19 
   2  -2   2  995.70   60.99 
  -2   2  -2  915.61   61.49 
  -2   2  -2  972.50   61.59 
  -2   2  -2 1005.70   61.09 
  -2   2  -2  984.40   60.99 
   2   2   2  947.71   61.39 
   2   2   2 1069.59   61.49 
  -4  -2  -2  277.67   21.70 
   4  -2   2  343.97   21.90 
   4  -2   2  364.16   22.60 
   4   2   2  322.87   22.30 
  -4   2  -2  349.87   23.00 
  -4   2  -2  336.97   21.90 
   4   2   2  340.57   22.90 
   4   2   2  350.26   22.40 
   6  -2   2  313.77   27.20 
   6  -2   2  382.66   26.30 
   6   2   2  381.26   26.10 
  -6   2  -2  323.67   27.90 
  -6   2  -2  363.46   24.20 
   6   2   2  382.66   25.00 
   6   2   2  366.36   24.40 
   8  -2   2  155.68   17.10 
  -8   2  -2  157.68   13.80 
   8   2   2  153.78   14.10 
   8   2   2  160.28   14.70 
  -8   2  -2  169.88   16.40 
   8   2   2  160.68   17.60 
  10  -2   2   76.89   12.60 
 -10  -2  -2   96.99   11.30 
  10   2   2   95.29   13.30 
 -10   2  -2   91.19   11.40 
 -10   2  -2   77.19   10.80 
 -12  -2  -2   40.80    8.60 
 -12  -2  -2   37.50    7.70 
  12  -2   2   37.80   11.80 
  12   2   2   48.70   12.20 
 -12   2  -2   53.09    9.90 
 -12   2  -2   72.19   10.60 
 -14  -2  -2    3.20    6.10 
  14  -2   2    2.50   10.50 
 -14  -2  -2    6.60   12.30 
 -14   2  -2   13.10    8.90 
 -14   2  -2   16.00    6.60 
  14   2   2   12.30   10.80 
 -16  -2  -2   11.30    7.90 
  16  -2   2   22.90   11.10 
  16   2   2   -4.20   10.20 
 -16   2  -2   -0.90    8.50 
 -18  -2  -2    6.70    7.30 
  18  -2   2   -1.80   10.10 
  18   2   2   10.60   14.80 
 -18   2  -2   18.80   11.60 
  17  -3  -2   16.30   11.20 
 -17  -3   2   37.10    8.90 
  17   3  -2   45.80   10.70 
 -17   3   2   51.69    9.40 
 -17   3   2   33.00    9.90 
 -15  -3   2    2.30    6.90 
  15  -3  -2   -8.50    8.70 
 -15  -3   2   15.60    7.70 
 -15   3   2    2.60    7.40 
  15   3  -2   -0.20    8.00 
 -15   3   2   -6.80    8.60 
 -13  -3   2  149.39   17.00 
  13  -3  -2  138.59   18.90 
 -13  -3   2  181.08   17.50 
 -13   3   2  160.08   16.80 
 -13   3   2  165.18   18.20 
  13   3  -2  154.08   22.40 
  11  -3  -2    1.10    7.80 
 -11  -3   2   -5.70    7.70 
 -11  -3   2   -7.30    9.80 
  11   3  -2   -4.90    5.90 
 -11   3   2    3.40    6.50 
 -11   3   2   -3.70    8.40 
   9  -3  -2  497.45   34.00 
  -9   3   2  481.95   34.60 
   9   3  -2  468.45   32.70 
  -9   3   2  466.65   32.70 
   7  -3  -2    3.90    5.50 
  -7  -3   2    7.40    4.80 
   7   3  -2    5.40    4.80 
   7   3  -2   14.10    5.10 
  -7   3   2    4.70    5.00 
   5  -3  -2  999.50   64.69 
   5  -3  -2 1065.09   64.79 
  -5  -3   2 1086.09   64.99 
  -5   3   2  995.20   64.89 
   5   3  -2 1074.09   64.99 
   5   3  -2 1052.39   64.49 
  -5   3   2  991.20   64.49 
   3  -3  -2    3.00    3.30 
   3  -3  -2    8.10    3.60 
  -3  -3   2    7.80    3.30 
  -3   3   2    1.60    3.90 
   3   3  -2    7.00    3.20 
   3   3  -2    6.10    3.00 
  -3   3   2    7.00    3.20 
  -3   3   2   -0.40    3.50 
  -1  -3   2 1414.26   80.89 
   1  -3  -2 1273.27   80.89 
  -1  -3   2 1230.88   80.89 
   1  -3  -2 1277.37   80.89 
  -1   3   2 1254.07   80.89 
  -1   3   2 1341.77   80.99 
   1   3  -2 1406.16   80.79 
   1   3  -2 1417.96   80.99 
   1  -3   2   43.00    4.80 
  -1  -3  -2   36.00    4.80 
  -1  -3  -2   28.50    4.10 
   1  -3   2   51.79    5.80 
   1  -3   2   31.90    3.70 
  -1   3  -2   36.90    5.00 
   1   3   2   37.70    4.70 
   1   3   2   42.50    5.10 
  -1   3  -2   48.50    4.60 
  -1   3  -2   23.20    5.00 
   3  -3   2  807.82   47.80 
   3  -3   2  720.03   47.60 
  -3   3  -2  796.42   48.50 
   3   3   2  786.32   48.10 
  -3   3  -2  760.62   47.60 
   3   3   2  738.73   47.80 
   5  -3   2  129.59   11.90 
   5   3   2  126.49   11.20 
   5   3   2  129.69   12.60 
  -5   3  -2  142.49   13.40 
   5   3   2  122.79   11.40 
   7  -3   2  266.47   21.70 
   7   3   2  302.27   21.00 
   7   3   2  262.17   21.60 
  -7   3  -2  289.17   20.10 
  -7   3  -2  249.38   21.80 
   9  -3   2   84.39   12.20 
   9   3   2  105.29   13.00 
   9   3   2   99.09   12.40 
  -9   3  -2   83.79   11.40 
  -9   3  -2   84.59   11.40 
   9   3   2  102.89   11.90 
 -11  -3  -2   52.29    8.50 
  11  -3   2   51.69   11.20 
 -11   3  -2   64.79   10.80 
  11   3   2   69.69   11.90 
 -11   3  -2   62.29    8.90 
 -13  -3  -2   52.79    8.60 
  13  -3   2   32.50   11.50 
 -13  -3  -2   32.00    8.50 
 -13   3  -2   43.70   10.70 
  13   3   2   61.09   12.30 
 -13   3  -2   48.30    8.60 
 -15  -3  -2   23.90    7.40 
  15  -3   2   22.50   11.30 
 -15  -3  -2    9.40    7.60 
  15   3   2    4.80   10.00 
 -15   3  -2   11.70    9.50 
  17  -3   2   27.60   11.50 
 -17  -3  -2   15.50    7.40 
 -17   3  -2   16.40    9.10 
  17   3   2   13.50   10.20 
  18  -4  -2   14.40   10.70 
 -18  -4   2  -11.90    9.80 
 -18   4   2   24.60    9.20 
 -16  -4   2   35.80    9.00 
 -16  -4   2   27.40    8.80 
  16  -4  -2   22.50   10.80 
 -16   4   2   38.70   10.60 
 -16   4   2   39.30    9.50 
  16   4  -2   39.60   10.30 
 -14  -4   2  106.49   11.10 
  14  -4  -2   64.39   12.50 
 -14  -4   2   68.79   10.60 
  14   4  -2   71.79   11.50 
 -14   4   2   66.29   10.60 
 -14   4   2   58.09   12.40 
 -12  -4   2  211.28   19.30 
  12  -4  -2  177.48   20.90 
  12   4  -2  178.98   18.80 
 -12   4   2  196.58   18.60 
 -12   4   2  248.68   22.50 
  10  -4  -2  131.39   18.10 
 -10   4   2  179.88   16.70 
  10   4  -2  179.18   16.60 
  10   4  -2  171.18   16.60 
 -10   4   2  207.98   20.10 
   8  -4  -2  737.43   48.60 
  -8   4   2  742.63   47.80 
   8   4  -2  728.03   48.30 
  -8   4   2  747.63   49.10 
   8   4  -2  732.23   47.60 
  -6  -4   2  381.36   27.20 
   6  -4  -2  372.66   29.00 
   6  -4  -2  457.55   27.80 
   6   4  -2  373.76   27.10 
  -6   4   2  426.06   27.20 
  -6   4   2  330.77   35.50 
   4  -4  -2 1851.11  112.49 
   4  -4  -2 1761.32  112.19 
  -4  -4   2 1866.01  112.69 
  -4   4   2 1851.11  112.69 
  -4   4   2 1779.02  112.39 
   4   4  -2 1907.91  112.89 
   4   4  -2 1832.32  112.09 
  -2  -4   2  582.34   39.60 
   2  -4  -2  607.84   39.60 
  -2   4   2  651.43   39.90 
   2   4  -2  676.43   40.00 
  -2   4   2  644.34   39.90 
   0  -4   2 2875.31  181.48 
   0  -4   2 3164.28  182.08 
   0  -4   2 3043.40  181.98 
   0  -4  -2 2841.42  181.68 
   0   4   2 2989.20  181.78 
   0   4  -2 3007.90  181.58 
   0   4   2 2991.40  181.68 
   0   4  -2 3085.39  181.58 
   2  -4   2  492.05   31.70 
   2  -4   2  499.55   31.90 
  -2   4  -2  515.75   31.80 
   2   4   2  471.05   32.10 
   2   4   2  527.35   32.20 
  -2   4  -2  521.25   32.90 
   4  -4   2 2435.06  147.29 
   4  -4   2 2349.76  147.19 
  -4   4  -2 2482.35  147.19 
   4   4   2 2358.16  147.09 
  -4   4  -2 2405.96  147.89 
   4   4   2 2475.35  147.69 
   6  -4   2  249.18   18.00 
   6   4   2  205.68   17.80 
   6   4   2  229.98   17.00 
  -6   4  -2  201.38   16.60 
   6   4   2  233.38   17.50 
  -6   4  -2  239.48   19.50 
   8  -4   2 1093.99   70.69 
  -8   4  -2 1199.08   69.89 
   8   4   2 1144.89   70.59 
  -8   4  -2 1127.99   71.09 
   8   4   2 1069.19   69.29 
   8   4   2 1036.80   70.49 
  10  -4   2   55.99   10.70 
  10   4   2   68.69   11.70 
 -10   4  -2   75.89    9.00 
  10   4   2   80.09   10.30 
  10   4   2   71.79    9.20 
 -10   4  -2   75.59   11.40 
  12  -4   2  361.56   30.80 
  12   4   2  311.37   28.50 
 -12   4  -2  370.66   28.90 
 -14  -4  -2   25.40    7.60 
  14  -4   2   21.20   10.20 
  14   4   2   19.30    9.80 
 -14   4  -2  -12.40   10.70 
 -14   4  -2   25.90    9.80 
  16  -4   2   76.79   13.50 
 -16   4  -2   76.99   12.20 
  16   4   2   70.79   13.10 
 -17  -5   2   12.50    8.50 
  17  -5  -2   22.10   10.60 
  17   5  -2   32.80    9.60 
 -17   5   2   34.10   10.20 
  15  -5  -2   15.30    9.80 
 -15  -5   2   -7.20    6.80 
 -15   5   2   13.00    7.80 
  15   5  -2    5.80    7.90 
 -15   5   2    5.10    9.60 
  13  -5  -2   73.29   12.60 
 -13  -5   2   87.09   12.10 
 -13   5   2  118.99   20.40 
 -13   5   2  101.89   16.60 
  13   5  -2  100.99   12.40 
  11  -5  -2   -8.00    7.30 
 -11   5   2    2.60    7.00 
  11   5  -2    1.00    5.40 
 -11   5   2    0.50    9.50 
  11   5  -2   -0.20    6.20 
   9  -5  -2  232.18   21.20 
  -9   5   2  250.87   23.70 
   9   5  -2  241.48   19.90 
  -9   5   2  261.07   20.40 
   9   5  -2  260.67   20.70 
   7  -5  -2    5.90    5.90 
   7   5  -2    5.00    4.70 
   7   5  -2    5.50    5.10 
  -7   5   2    6.50    8.40 
  -7   5   2   12.80    6.00 
   5  -5  -2  364.66   25.20 
  -5  -5   2  441.16   29.10 
   5   5  -2  360.16   25.10 
  -5   5   2  350.66   26.80 
   5   5  -2  369.86   25.60 
  -5   5   2  361.96   25.80 
  -3  -5   2   32.40    5.20 
   3  -5  -2   37.00    5.30 
   3  -5  -2   29.10    4.60 
   3   5  -2   39.30    6.80 
   3   5  -2   54.59    6.40 
  -3   5   2   38.80    6.20 
  -3   5   2   33.10    6.30 
  -1  -5   2  348.87   22.90 
   1  -5  -2  317.07   22.60 
  -1  -5   2  350.66   22.40 
  -1  -5   2  360.06   23.20 
  -1   5   2  327.97   22.90 
   1   5  -2  374.36   22.80 
  -1   5   2  326.87   22.80 
   1   5  -2  348.97   22.20 
   1  -5   2   70.99    7.30 
   1   5   2   65.79    8.40 
  -1   5  -2   70.49    9.10 
  -1   5  -2   73.39    7.20 
   1   5   2   66.19    7.70 
   3  -5   2  257.67   18.10 
   3  -5   2  244.88   17.60 
   3   5   2  250.57   18.10 
   3   5   2  269.37   18.20 
  -3   5  -2  269.57   17.90 
  -3   5  -2  221.28   19.10 
   5  -5   2   83.49   10.00 
   5   5   2   72.29    9.30 
  -5   5  -2  111.19   13.60 
  -5   5  -2   76.79    8.50 
   5   5   2   87.39    9.90 
   5   5   2   77.59    9.60 
   7  -5   2  128.09   13.40 
   7   5   2  112.69   12.30 
   7   5   2  101.19   11.40 
   7   5   2  108.29   11.60 
  -7   5  -2   94.79   12.30 
  -7   5  -2   99.39   11.70 
   9  -5   2   58.59    8.70 
   9  -5   2   56.39    9.90 
   9   5   2   72.59    8.50 
  -9   5  -2   53.09   10.40 
   9   5   2   63.59    9.40 
  -9   5  -2   69.59    8.50 
   9   5   2   51.99    9.80 
  11  -5   2   23.00    9.20 
  11   5   2   41.10    8.60 
 -11   5  -2   27.80    9.70 
  11   5   2   44.70   10.10 
 -11   5  -2   29.70    7.10 
  11   5   2   31.00    6.90 
  13  -5   2   20.00    9.90 
 -13   5  -2   31.70   10.90 
 -13   5  -2   37.80   10.40 
  13   5   2   34.10   13.40 
  15  -5   2   10.00    9.80 
 -15  -5  -2   17.00    7.30 
 -15  -5  -2   14.90    9.50 
  15   5   2   10.20    9.40 
 -15   5  -2   14.00    9.20 
  17  -5   2   21.00   11.00 
 -17  -5  -2   31.40    7.80 
 -17   5  -2   12.60   16.00 
  17   5   2   14.50    9.70 
 -16  -6   2    6.70    7.60 
  16  -6  -2    6.40    8.90 
  16   6  -2   11.10    8.40 
 -16   6   2   10.00    7.40 
 -16   6   2   -0.70    9.10 
  14  -6  -2   -1.00    8.70 
 -14  -6   2    9.20    7.60 
 -14   6   2   -5.30    7.20 
  14   6  -2   14.90    8.30 
 -14   6   2   14.80   10.70 
  12  -6  -2   25.50   16.20 
 -12   6   2   16.10    7.70 
  12   6  -2   28.00    8.00 
  12   6  -2   36.00    8.70 
  10  -6  -2   43.90    8.50 
  10   6  -2   -4.60    5.50 
 -10   6   2   16.60   10.30 
 -10   6   2   -3.10    6.80 
   8  -6  -2  117.79   13.40 
   8   6  -2   93.59   12.50 
  -8   6   2   96.09   12.70 
   8   6  -2   95.49   10.60 
  -8   6   2   98.69   13.30 
   6  -6  -2   14.30    5.30 
  -6  -6   2   15.00    5.20 
   6   6  -2   11.50    5.20 
  -6   6   2   21.20    6.50 
  -6   6   2    5.90    7.50 
   6   6  -2    7.70    5.10 
   4  -6  -2  208.28   15.60 
  -4  -6   2  194.58   16.10 
  -4   6   2  228.78   17.40 
   4   6  -2  188.68   16.40 
   4   6  -2  234.68   16.50 
  -4   6   2  235.48   18.10 
  -2  -6   2   37.40    5.40 
  -2   6   2   38.50    6.20 
  -2   6   2   37.40    6.10 
   2   6  -2   43.10    5.80 
   0  -6   2  328.77   21.20 
   0  -6   2  320.17   21.40 
   0   6   2  308.07   21.90 
   0   6   2  326.37   22.10 
   0   6  -2  326.57   21.50 
   0   6  -2  322.57   21.70 
   2  -6   2   45.80    5.80 
   2   6   2   48.90    6.50 
   2   6   2   53.19    6.50 
  -2   6  -2   49.60    7.20 
  -2   6  -2   58.19    7.50 
   4  -6   2  313.37   23.10 
   4   6   2  343.57   23.90 
  -4   6  -2  356.46   25.10 
   4   6   2  340.77   23.50 
  -4   6  -2  342.77   23.40 
   6  -6   2   40.00    7.20 
   6   6   2   61.79    7.30 
   6   6   2   45.10    6.40 
  -6   6  -2   32.30    8.60 
   6   6   2   46.80    7.40 
  -6   6  -2   33.40    6.80 
   8  -6   2  217.78   19.30 
   8  -6   2  242.78   18.10 
   8   6   2  175.28   17.10 
   8   6   2  178.08   15.90 
   8   6   2  148.59   17.00 
  -8   6  -2  222.68   16.70 
  -8   6  -2  194.78   20.20 
  10  -6   2   16.10    8.00 
  10  -6   2   22.40    6.30 
  10   6   2    8.70    6.40 
 -10   6  -2    8.40    6.80 
 -10   6  -2   10.80    8.70 
  10   6   2   19.30    7.70 
  10   6   2   11.20    5.30 
  12  -6   2   48.60   11.10 
  12   6   2   66.89   10.30 
  12   6   2   62.89   11.40 
  12   6   2   61.49    8.80 
 -12   6  -2   70.39   11.40 
 -12   6  -2   70.69   11.30 
  14  -6   2    0.80    9.10 
 -14  -6  -2   -2.20    7.70 
  14   6   2   -9.90    7.70 
 -14   6  -2   -6.00    8.90 
  16  -6   2   10.30    9.70 
 -16  -6  -2   20.40    7.10 
  16   6   2    7.80    9.40 
 -16   6  -2    7.10    9.40 
  17  -7  -2   37.80   11.10 
 -17  -7   2   54.49    9.70 
  17   7  -2   26.40   11.00 
 -17   7   2   49.30   14.30 
  15  -7  -2    6.60    8.80 
 -15  -7   2   17.70    8.20 
 -15   7   2    7.10   10.00 
  15   7  -2    4.20    7.90 
 -15   7   2    5.10    8.20 
  13  -7  -2  145.49   18.60 
  13   7  -2  167.98   17.30 
  13   7  -2  168.08   17.40 
 -13   7   2  201.78   21.90 
 -13   7   2  154.28   17.60 
  11  -7  -2   26.20    8.30 
  11   7  -2   40.10    8.80 
 -11   7   2   35.40    8.80 
  11   7  -2   26.20    7.60 
   9  -7  -2  544.25   34.90 
  -9   7   2  518.95   35.00 
  -9   7   2  529.25   37.10 
   9   7  -2  464.65   33.90 
   9   7  -2  468.15   34.90 
   7  -7  -2   57.09    8.70 
   7   7  -2   77.89    9.10 
  -7   7   2   70.99   11.90 
   7   7  -2   81.89   11.30 
  -7   7   2   97.19   12.70 
  -5  -7   2  791.42   51.09 
   5  -7  -2  767.72   50.39 
   5   7  -2  794.62   50.39 
  -5   7   2  821.22   51.49 
   5   7  -2  851.11   51.39 
  -5   7   2  758.62   51.89 
  -3  -7   2  177.58   13.50 
   3  -7  -2  158.68   12.30 
   3   7  -2  150.18   13.70 
   3   7  -2  165.88   12.70 
  -3   7   2  150.68   14.50 
  -3   7   2  153.58   15.10 
  -1  -7   2  913.01   57.09 
  -1   7   2  939.31   57.59 
   1   7  -2  915.01   57.39 
  -1   7   2  908.21   57.29 
   1   7  -2  899.31   56.59 
   1  -7   2  256.27   17.60 
   1  -7   2  237.68   17.30 
  -1   7  -2  245.48   18.80 
   1   7   2  253.77   18.40 
   1   7   2  260.07   19.60 
  -1   7  -2  247.08   17.90 
   3  -7   2  660.73   42.20 
   3   7   2  651.83   42.50 
   3   7   2  678.33   42.90 
  -3   7  -2  652.93   42.40 
  -3   7  -2  671.93   43.30 
   5  -7   2  238.98   18.40 
  -5   7  -2  246.38   20.80 
   5   7   2  249.88   19.70 
   5   7   2  230.48   18.10 
  -5   7  -2  229.58   18.50 
   7  -7   2  308.27   23.30 
   7  -7   2  345.47   24.90 
   7   7   2  298.87   22.30 
  -7   7  -2  345.67   25.80 
  -7   7  -2  345.57   23.00 
   7   7   2  265.17   22.70 
   7   7   2  315.37   23.80 
   9  -7   2  227.88   17.30 
   9  -7   2  248.38   19.00 
   9   7   2  170.18   18.30 
  -9   7  -2  218.38   21.20 
  -9   7  -2  203.58   17.50 
   9   7   2  188.18   16.70 
   9   7   2  193.58   18.10 
  11  -7   2  104.19   13.40 
  11  -7   2   83.79   12.20 
 -11   7  -2   92.69   12.90 
  11   7   2  104.09   14.40 
 -11   7  -2  105.59   11.80 
  11   7   2   96.39   11.90 
  11   7   2   99.79   12.60 
  13  -7   2   50.39   11.30 
  13   7   2   56.49   11.50 
 -13   7  -2   72.09   12.00 
  13   7   2   68.69   10.80 
  15  -7   2    2.90    9.40 
 -15  -7  -2   20.70    7.40 
  15   7   2    8.00    9.00 
 -15   7  -2   25.70   10.00 
  16  -8  -2   37.90   10.70 
 -16  -8   2   31.60    9.10 
 -16   8   2   45.50   11.80 
  16   8  -2   41.50    9.60 
  14  -8  -2   50.09   10.70 
  14   8  -2   52.09   10.00 
 -14   8   2   61.19   10.60 
  14   8  -2   48.50    9.60 
 -14   8   2   75.29   13.30 
  12  -8  -2  177.98   17.60 
 -12   8   2  154.08   20.50 
 -12   8   2  203.48   22.00 
  12   8  -2  131.09   16.20 
  12   8  -2  135.59   16.40 
  10  -8  -2  181.88   16.90 
  10   8  -2  143.49   15.50 
  10   8  -2  138.19   16.30 
 -10   8   2  175.38   16.70 
   8  -8  -2  525.85   35.40 
   8   8  -2  486.55   35.90 
   8   8  -2  511.85   35.10 
  -8   8   2  547.75   36.30 
  -8   8   2  557.54   38.30 
   6  -8  -2  264.37   20.60 
   6   8  -2  290.77   21.90 
  -6   8   2  305.17   22.70 
   6   8  -2  285.67   20.90 
  -6   8   2  281.87   24.10 
  -4  -8   2  961.30   67.19 
   4   8  -2 1082.99   66.69 
  -4   8   2 1056.09   68.09 
  -4   8   2 1147.79   67.99 
   4   8  -2 1119.49   67.89 
  -2  -8   2  410.16   28.60 
   2   8  -2  395.26   27.80 
  -2   8   2  446.76   29.70 
   2   8  -2  421.46   28.90 
  -2   8   2  486.05   29.90 
   0  -8   2 1545.85   94.09 
   0  -8   2 1508.05   94.29 
   0   8  -2 1580.64   95.59 
   0   8   2 1540.85   94.79 
   0   8   2 1540.85   94.49 
   0   8  -2 1484.55   94.39 
   2  -8   2  334.37   23.60 
   2  -8   2  359.56   23.60 
   2   8   2  345.77   24.40 
   2   8   2  339.87   24.50 
  -2   8  -2  366.36   24.40 
   4  -8   2 1304.17   79.89 
   4  -8   2 1264.47   79.89 
   4   8   2 1255.57   79.79 
  -4   8  -2 1349.47   81.09 
   4   8   2 1221.48   82.49 
  -4   8  -2 1336.07   80.29 
   6  -8   2  206.28   16.60 
   6  -8   2  214.48   17.20 
   6   8   2  191.18   16.50 
   6   8   2  222.98   17.50 
  -6   8  -2  211.58   17.20 
  -6   8  -2  180.28   20.10 
   8  -8   2  696.53   46.40 
   8  -8   2  716.13   46.90 
  -8   8  -2  759.52   46.60 
  -8   8  -2  722.03   48.00 
   8   8   2  686.53   45.60 
   8   8   2  703.43   47.20 
  10  -8   2   67.19   10.40 
  10  -8   2   90.19   12.20 
  10   8   2   75.39   10.90 
  10   8   2   88.99   11.00 
  10   8   2   71.29   10.70 
 -10   8  -2   77.59   11.60 
 -10   8  -2   75.19    9.70 
  12  -8   2  233.38   21.40 
  12   8   2  236.88   18.90 
 -12   8  -2  243.18   22.90 
  12   8   2  234.28   21.10 
  12   8   2  197.18   29.00 
  14  -8   2   34.50   10.20 
  14   8   2   16.80    9.00 
  14   8   2   29.60    8.40 
 -14   8  -2   34.30   10.40 
  16  -8   2   38.70   10.90 
 -16  -8  -2   49.30    8.50 
 -16   8  -2   52.89   10.90 
  16   8   2   62.09   10.60 
  15  -9  -2   12.10    8.80 
  15   9  -2    3.30    7.10 
 -15   9   2  -13.00   10.10 
  13  -9  -2   58.39   10.60 
 -13   9   2   83.09   14.00 
  13   9  -2   61.69   10.10 
 -13   9   2   47.70   10.00 
  13   9  -2   56.29    9.50 
  11  -9  -2   15.40    7.60 
 -11   9   2   11.50   11.30 
 -11   9   2    9.70   10.90 
  11   9  -2    9.10    6.70 
  11   9  -2    9.10    6.40 
   9  -9  -2  141.49   14.80 
   9   9  -2  119.49   14.30 
   9   9  -2  158.08   15.70 
  -9   9   2  136.99   15.80 
  -9   9   2  136.69   26.20 
   7  -9  -2   11.90    5.70 
  -7   9   2    6.20    9.20 
   7   9  -2   11.80    6.00 
  -7   9   2   11.50    7.90 
   7   9  -2    7.30    5.50 
   5  -9  -2  240.98   17.60 
  -5   9   2  222.18   21.40 
   5   9  -2  219.68   17.70 
   5   9  -2  236.28   18.70 
  -5   9   2  246.18   20.10 
  -3  -9   2   15.50    5.50 
   3  -9  -2   20.20    5.70 
  -3   9   2   22.20    7.50 
   3   9  -2   21.20    5.90 
  -3   9   2   18.50    7.10 
   3   9  -2   18.70    5.00 
   3   9  -2   14.70    4.90 
  -1  -9   2  236.98   18.00 
  -1  -9   2  248.98   18.00 
   1   9  -2  225.18   18.30 
  -1   9   2  244.38   19.60 
   1   9  -2  254.97   18.90 
  -1   9   2  285.57   20.10 
   1  -9   2   44.60    6.20 
   1  -9   2   31.30    5.80 
  -1   9  -2   46.90    7.70 
   1   9   2   20.70    6.40 
   1   9   2   25.70    6.70 
   3  -9   2  163.38   14.60 
   3  -9   2  166.88   13.80 
  -3   9  -2  171.58   17.20 
   3   9   2  176.48   15.40 
  -3   9  -2  144.59   14.30 
   3   9   2  178.38   15.90 
   5  -9   2   32.60    7.00 
   5  -9   2   51.99    7.10 
   5   9   2   30.90    7.00 
  -5   9  -2   44.90    7.70 
  -5   9  -2   30.60    9.00 
   5   9   2   50.29    7.40 
   7  -9   2   80.09   10.10 
   7  -9   2   75.99   10.80 
   7   9   2   80.99    9.30 
   7   9   2   90.79   12.40 
  -7   9  -2   77.09   10.20 
  -7   9  -2   73.79   11.50 
   9  -9   2   36.30    8.60 
   9  -9   2   39.10    7.60 
   9   9   2   41.10    8.20 
   9   9   2   49.10    8.20 
  -9   9  -2   27.40    7.80 
  -9   9  -2   25.00    9.60 
   9   9   2   49.20    7.40 
  11  -9   2   15.80    8.40 
  11   9   2   33.70    6.50 
  11   9   2   27.90    8.10 
 -11   9  -2   22.70   10.00 
  11   9   2   30.20    8.40 
  13  -9   2   31.70    9.10 
  13   9   2   25.50    8.30 
 -13   9  -2   23.40   10.20 
  13   9   2    9.50    8.30 
  13   9   2   33.10    6.60 
  15  -9   2   12.00    8.80 
  15   9   2    8.30    7.10 
  15   9   2   10.10    7.50 
 -15   9  -2    9.10   11.30 
  14 -10  -2   32.20    9.20 
  14  10  -2   15.70    7.30 
 -14  10   2   22.70   12.00 
  14  10  -2    9.30   13.30 
  12 -10  -2   31.20    8.60 
  12  10  -2   35.10    8.20 
 -12  10   2   15.70    8.50 
 -12  10   2   33.70   12.30 
  12  10  -2   24.40    7.70 
  10 -10  -2   16.80    7.30 
  10  10  -2   29.20    7.30 
 -10  10   2   31.00    9.60 
 -10  10   2    7.80   10.70 
   8 -10  -2   65.09    9.10 
  -8  10   2   73.99   12.80 
  -8  10   2   75.69   11.30 
   8  10  -2   84.49   14.50 
   8  10  -2   71.29    9.30 
   6 -10  -2   16.90    5.90 
  -6  10   2   12.40    7.60 
   6  10  -2   10.50    5.70 
  -6  10   2    9.20    8.90 
   6  10  -2    9.10    5.80 
   4 -10  -2  165.68   13.80 
   4  10  -2  153.58   15.30 
  -4  10   2  159.98   17.40 
   4  10  -2  169.48   14.20 
  -4  10   2  183.58   17.10 
  -2 -10   2    5.00    4.50 
  -2  10   2   14.10    6.90 
   2  10  -2   13.50    5.30 
  -2  10   2    5.80    6.50 
   2  10  -2   16.00    5.40 
   0 -10   2  222.68   18.40 
   0 -10   2  258.37   18.90 
   0  10  -2  287.37   19.60 
   0  10  -2  259.07   19.50 
   0  10   2  245.38   20.20 
   0  10   2  255.27   20.20 
   2 -10   2    9.50    4.40 
   2 -10   2    0.60    5.00 
   2  10   2    7.10    6.10 
   2  10   2    5.50    5.40 
  -2  10  -2    0.20    5.20 
  -2  10  -2   18.50    7.30 
   4 -10   2  220.98   17.30 
   4 -10   2  242.98   18.20 
  -4  10  -2  233.38   20.90 
  -4  10  -2  208.38   21.30 
   4  10   2  216.98   18.70 
   4  10   2  224.58   18.40 
   6 -10   2    9.60    5.10 
   6 -10   2    4.10    5.90 
  -6  10  -2   10.20    6.80 
  -6  10  -2   -5.50    8.00 
   6  10   2    3.20    5.20 
   6  10   2   -1.80    5.30 
   8 -10   2  121.39   14.90 
   8 -10   2  123.39   14.20 
  -8  10  -2  131.49   17.30 
   8  10   2  130.29   13.40 
   8  10   2  122.79   14.60 
  -8  10  -2  159.98   18.60 
  10 -10   2   -0.60    7.20 
  10  10   2   -1.70    5.10 
 -10  10  -2    8.60    9.50 
  10  10   2    7.70    6.50 
  10  10   2  -13.70    5.90 
  12 -10   2   61.99   10.70 
  12  10   2   44.10    9.60 
  12  10   2   60.49   10.40 
 -12  10  -2   61.59   11.90 
  14  10   2   -1.20    6.40 
  14  10   2    9.70    7.60 
  13 -11  -2   79.89   11.10 
  13  11  -2   64.09   10.20 
  13  11  -2   85.19   11.60 
 -13  11   2   72.49   14.00 
  11 -11  -2   37.80    8.40 
 -11  11   2   19.10    8.80 
 -11  11   2    8.30   10.90 
  11  11  -2   30.20    7.80 
  11  11  -2   23.30    7.60 
   9 -11  -2  213.28   22.70 
  -9  11   2  224.58   24.20 
   9  11  -2  210.48   19.10 
  -9  11   2  235.28   20.70 
   7 -11  -2   64.29    8.80 
  -7  11   2   62.69   11.90 
  -7  11   2   60.09   15.90 
   7  11  -2   53.99    9.20 
   7  11  -2   88.89    9.40 
   5 -11  -2  340.77   24.00 
  -5  11   2  376.96   29.10 
   5  11  -2  343.27   24.30 
  -5  11   2  340.77   27.20 
   5  11  -2  329.57   25.30 
   3 -11  -2  136.99   12.10 
   3  11  -2  121.89   12.30 
   3  11  -2  143.49   12.50 
  -3  11   2  128.29   17.60 
   3  11  -2  103.19   13.20 
  -3  11   2  146.09   16.10 
  -1 -11   2  342.77   26.10 
  -1  11   2  389.66   27.80 
   1  11  -2  388.66   26.50 
   1  11  -2  360.06   26.90 
  -1  11   2  459.35   31.00 
   1 -11   2  211.48   16.30 
   1 -11   2  142.19   17.60 
  -1  11  -2  207.08   17.20 
  -1  11  -2  219.38   17.70 
   1  11   2  211.58   17.90 
   1  11   2  187.98   17.30 
   3 -11   2  278.67   20.70 
   3 -11   2  267.77   20.40 
   3  11   2  293.57   21.40 
   3  11   2  291.57   22.00 
  -3  11  -2  285.17   22.70 
  -3  11  -2  240.98   21.20 
   5 -11   2  161.98   15.00 
   5 -11   2  176.08   15.80 
   5  11   2  187.18   15.80 
  -5  11  -2  185.78   18.70 
  -5  11  -2  127.19   16.00 
   5  11   2  166.68   16.30 
   7 -11   2  166.58   15.10 
   7 -11   2  147.99   15.40 
   7  11   2  126.29   15.20 
   7  11   2  146.39   14.80 
  -7  11  -2  150.78   19.10 
  -7  11  -2  153.58   18.90 
   9 -11   2  124.99   14.70 
   9  11   2  115.19   13.40 
  -9  11  -2   87.29   13.40 
   9  11   2  112.39   12.80 
  11 -11   2   51.89   10.10 
  11  11   2   50.99    9.50 
  11  11   2   54.79   12.50 
 -11  11  -2   49.80   11.10 
  13 -11   2   62.79   11.00 
  13  11   2   55.89    9.80 
  13  11   2   28.00    9.10 
  13  11   2   55.89    7.60 
  12 -12  -2   43.80    9.40 
 -12  12   2   43.90   13.10 
  12  12  -2   55.29    9.60 
  12  12  -2   59.79    9.00 
  10 -12  -2   62.99    9.50 
  10  12  -2   58.09    9.10 
 -10  12   2   79.89   13.40 
  10  12  -2   61.09    9.70 
 -10  12   2   64.99   10.50 
   8  12  -2  175.98   19.10 
  -8  12   2  192.68   22.10 
   8  12  -2  154.18   16.50 
  -8  12   2  189.58   18.30 
   6 -12  -2   96.39   12.20 
  -6  12   2   88.99   12.50 
   6  12  -2  114.39   12.70 
  -6  12   2  150.68   18.20 
   6  12  -2  100.89   12.90 
   4 -12  -2  346.47   23.70 
   4  12  -2  336.47   23.40 
  -4  12   2  318.07   26.10 
   4  12  -2  335.37   24.00 
  -4  12   2  409.96   30.50 
   4  12  -2  309.97   25.20 
  -2  12   2  196.48   18.00 
   2  12  -2  160.48   15.00 
  -2  12   2  167.58   17.50 
   2  12  -2  153.18   15.80 
   2  12  -2  166.78   14.40 
   0 -12   2  403.46   30.00 
   0 -12   2  454.15   29.90 
   0  12  -2  468.55   30.40 
   0  12   2  470.45   31.10 
   0  12   2  425.86   31.50 
   0  12  -2  421.86   30.70 
   2 -12   2  159.28   15.90 
   2 -12   2  167.58   15.00 
  -2  12  -2  196.88   17.20 
   2  12   2  179.28   16.30 
   2  12   2  120.89   16.20 
  -2  12  -2  147.59   15.60 
   4 -12   2  399.46   27.80 
   4 -12   2  412.76   27.70 
  -4  12  -2  413.66   29.80 
   4  12   2  402.26   27.80 
   4  12   2  382.76   28.60 
  -4  12  -2  334.97   27.90 
   6 -12   2  105.39   13.20 
   6  12   2   76.99   10.70 
   6  12   2   96.79   10.60 
  -6  12  -2   74.19   12.10 
   8 -12   2  224.68   20.20 
   8  12   2  219.28   20.40 
   8  12   2  239.98   19.00 
  -8  12  -2  287.97   24.00 
  10 -12   2   28.70    8.50 
 -10  12  -2   24.80   10.60 
  10  12   2   40.90    8.40 
  10  12   2   41.90    6.90 
  12 -12   2   80.39   12.00 
  12  12   2  105.39   12.90 
  12  12   2   90.99   10.90 
  11 -13  -2    4.80    7.20 
  11  13  -2   11.40    5.80 
 -11  13   2   -1.20   10.70 
  11  13  -2    6.90    6.30 
   9 -13  -2   49.10    8.20 
  -9  13   2   53.99   12.20 
  -9  13   2   32.60    9.60 
   9  13  -2   44.80    8.20 
   9  13  -2   39.80    8.50 
  -7  13   2   14.10    8.70 
   7  13  -2    7.70    6.10 
  -7  13   2   15.40   10.10 
   7  13  -2    2.70    6.30 
   5 -13  -2   64.39    8.20 
  -5  13   2   60.49   11.30 
   5  13  -2   60.39    8.60 
   5  13  -2   60.39    9.40 
  -5  13   2   63.59   10.60 
   3  13  -2   -0.20    5.50 
  -3  13   2   16.60    8.00 
  -3  13   2   -1.90    8.10 
   3  13  -2   -4.20    5.60 
   3  13  -2    6.10    6.10 
  -1  13   2   74.19   10.90 
  -1  13   2   57.49   10.10 
   1  13  -2   40.00    8.80 
   1  13  -2   71.89    9.00 
   1 -13   2   16.00    6.40 
  -1  13  -2   11.40    7.40 
   1  13   2    3.90    6.60 
   1  13   2   11.50    8.80 
  -1  13  -2    3.40    5.90 
  -3  13  -2   43.40   11.30 
   3  13   2   39.70    8.60 
  -3  13  -2   45.90    8.80 
   3  13   2   54.39    9.00 
   5 -13   2    4.50    6.50 
   5  13   2   10.90    7.00 
  -5  13  -2    0.40    8.90 
   5  13   2    2.50    5.40 
  -5  13  -2   19.10    6.90 
   7 -13   2   22.30    7.60 
  -7  13  -2   32.60   10.40 
   7  13   2   33.50    7.40 
   7  13   2   23.60   11.60 
   9 -13   2   22.10    8.00 
   9  13   2    3.80    5.70 
  -9  13  -2   21.00   10.70 
   9  13   2   11.90    6.60 
  11 -13   2   26.60    8.50 
  11  13   2   10.90    5.10 
  11  13   2    3.10    6.10 
  10 -14  -2    7.70    6.70 
  10  14  -2    5.60    6.20 
  10  14  -2    6.30    5.80 
   8 -14  -2   19.10    6.70 
   8  14  -2   16.80    6.90 
  -8  14   2    7.40   10.40 
  -8  14   2   17.50    8.50 
   8  14  -2   18.60    6.70 
   6 -14  -2   14.60    6.70 
  -6  14   2    8.90    8.10 
   6  14  -2    4.10    5.40 
  -6  14   2   15.20    9.80 
   6  14  -2    7.60    6.30 
   4 -14  -2   29.50    6.40 
   4  14  -2   29.00    7.70 
  -4  14   2   27.10   10.10 
   4  14  -2   43.90    7.70 
   4  14  -2   30.80    6.40 
  -4  14   2   24.40    9.10 
  -2  14   2    5.30    8.60 
   2  14  -2    8.50    6.20 
   2  14  -2   12.50    6.40 
  -2  14   2    0.40    7.30 
   0  14  -2   42.00    8.40 
   0  14   2   48.30    9.20 
   0  14   2   53.99    9.70 
   0  14  -2   48.90    9.20 
   2 -14   2    3.20    6.40 
  -2  14  -2   -0.60    7.90 
   2  14   2    0.20    6.10 
  -2  14  -2   -0.30    6.50 
   2  14   2    1.80    7.10 
   4 -14   2   47.00    8.50 
   4  14   2   55.69    8.90 
  -4  14  -2   39.10   10.00 
   4  14   2   41.20    8.70 
   6 -14   2   -4.30    6.60 
   6  14   2   -6.20    6.20 
   6  14   2    7.00    6.00 
  -6  14  -2    1.60    9.30 
   8 -14   2   28.10    8.10 
   8  14   2   27.90    7.50 
  -8  14  -2   28.40   10.60 
   8  14   2   20.30    6.30 
  10 -14   2    4.00    8.20 
 -10  14  -2  -14.40    9.70 
  10  14   2    3.00    6.30 
  10  14   2    3.40    4.90 
   9 -15  -2   54.49    8.40 
  -9  15   2   52.29   11.90 
   9  15  -2   54.09    8.30 
   7 -15  -2   22.80    6.60 
  -7  15   2   22.20   10.20 
  -7  15   2   11.60    8.40 
   7  15  -2   35.10    7.30 
   5 -15  -2   89.89   11.20 
   5  15  -2  104.99   10.70 
  -5  15   2   66.49   12.50 
   5  15  -2   78.89   11.30 
  -5  15   2   68.79   11.50 
  -3  15   2   49.20   10.70 
  -3  15   2   35.80    9.70 
   3  15  -2   55.19    8.20 
   3  15  -2   56.19    8.50 
  -1  15   2  130.79   16.30 
  -1  15   2   80.69   12.00 
   1  15  -2  127.09   13.60 
   1  15  -2   80.29   10.40 
   1  15   2   65.29   10.30 
  -1  15  -2   65.99   10.10 
   3 -15   2   81.59   10.30 
  -3  15  -2   55.59   10.90 
   3  15   2   91.39   11.00 
   3  15   2   81.69   11.40 
   5 -15   2   54.39    9.00 
   5  15   2   61.19    9.30 
  -5  15  -2   63.59   11.10 
   7 -15   2   35.80    8.60 
   7  15   2   44.40    9.10 
  -7  15  -2   45.60   11.00 
   7  15   2   44.50    7.80 
   6 -16  -2   27.40    6.50 
   6  16  -2   13.40    6.80 
   4  16  -2   47.10    7.20 
  -4  16   2   45.00   11.10 
   4  16  -2   46.60    8.00 
  -4  16   2   20.10    9.10 
  -2  16   2   22.30    8.00 
  -2  16   2   14.00    9.10 
   2  16  -2   26.30    7.20 
   2  16  -2   26.50    7.30 
   0  16   2   59.29   10.30 
   0  16   2   33.20    9.30 
   0  16  -2   61.39    8.40 
   0  16  -2   47.00    9.10 
   2  16   2   16.80    7.50 
  -2  16  -2   18.90    8.50 
   2  16   2   35.80    8.60 
   4 -16   2   63.99    9.40 
   4  16   2   58.39    9.10 
   4  16   2   52.29    9.80 
  -4  16  -2   43.30   10.20 
   6 -16   2   16.50    7.20 
   6  16   2   16.50    6.40 
   6  16   2   12.40    6.70 
  -6  16  -2   24.40   10.00 
   3  17  -2   -6.90    5.90 
   3  17  -2    1.90    5.70 
  -1  17   2   -2.90   13.60 
   1  17  -2  -10.30    6.40 
   1  17  -2   15.40    6.40 
  -1  17   2   17.80    8.60 
   1  17   2  -10.00    6.30 
   1  17   2   -4.30    7.70 
  -1  17  -2    0.70    7.30 
  -1  17  -2   -6.40    5.60 
   3  17   2   -4.40    6.30 
  18   0  -3    5.50   10.20 
 -18   0   3   14.60    8.30 
 -18   0   3    7.50    7.90 
  16   0  -3    6.20    8.40 
 -16   0   3    7.60    7.40 
 -16   0   3  -18.40    7.50 
 -14   0   3   10.40    8.10 
  14   0  -3    7.10    8.10 
 -14   0   3   21.80    8.90 
  12   0  -3   -4.60    6.80 
 -12   0   3    0.80    8.60 
 -12   0   3    8.10    7.20 
  10   0  -3   18.90    6.90 
 -10   0   3   14.60   14.30 
 -10   0   3    0.40    5.90 
   8   0  -3    1.20    5.30 
  -8   0   3   -1.20    5.30 
  -8   0   3   -4.90    6.90 
   6   0  -3    3.00    4.20 
   6   0  -3    7.40    3.40 
  -6   0   3    6.50    4.40 
  -6   0   3    7.70    5.10 
  -4   0   3   -3.10    3.10 
   4   0  -3    0.60    3.20 
   2   0  -3    1.00    1.60 
  -2   0   3    2.40    1.90 
   2   0  -3    0.30    2.00 
  -2   0   3    2.90    2.40 
   2   0  -3    1.50    2.40 
   0   0   3    0.90    1.40 
   0   0   3    0.90    2.10 
   0   0  -3    4.70    1.50 
  -2   0  -3   -0.50    2.50 
   2   0   3   -1.50    2.20 
   2   0   3    4.70    2.90 
  -2   0  -3    3.50    2.20 
   4   0   3    7.40    3.50 
   4   0   3    6.90    4.00 
   6   0   3    5.90    5.80 
  -6   0  -3    3.30    3.80 
  -8   0  -3    2.40    4.70 
   8   0   3   -8.60    7.90 
 -10   0  -3   -1.10    6.30 
 -10   0  -3   -3.60    4.60 
  10   0   3   -2.40    9.50 
 -12   0  -3  -13.40    6.90 
 -12   0  -3   -4.30    5.30 
  12   0   3   -5.90   10.80 
 -14   0  -3    0.70    7.80 
 -14   0  -3   11.50    8.60 
  14   0   3   10.20   11.60 
 -16   0  -3   -2.60    7.80 
  16   0   3   -8.90   10.70 
 -17  -1   3   -5.70    8.60 
  17  -1  -3   12.60    9.70 
 -17  -1   3   -7.60    7.60 
 -17   1   3   -3.40    7.30 
  17   1  -3   13.30    9.10 
 -17   1   3   -8.10    8.10 
  15  -1  -3   13.50    8.90 
 -15  -1   3    8.30    8.40 
 -15  -1   3    6.10    7.40 
  15   1  -3    9.30    8.50 
 -15   1   3    3.60    8.70 
 -15   1   3    0.80    7.20 
 -13  -1   3   40.30    8.90 
  13  -1  -3   24.90   10.90 
 -13  -1   3   18.70    9.10 
 -13   1   3   31.50    9.70 
 -13   1   3   19.90    8.70 
  13   1  -3   26.10   11.30 
 -11  -1   3   26.50    8.90 
 -11  -1   3   38.30    8.30 
  11  -1  -3   29.10    8.70 
 -11   1   3   32.30    9.80 
  11   1  -3   41.80    8.60 
 -11   1   3   40.20   10.00 
  -9  -1   3   65.19   10.10 
  -9  -1   3   79.09    9.90 
   9  -1  -3   75.69   10.20 
  -9   1   3   63.49    9.40 
   9   1  -3   76.79    9.80 
  -7  -1   3  122.99   12.40 
  -7  -1   3  121.69   11.90 
  -7   1   3  107.79   12.20 
  -7   1   3  120.29   14.20 
   7   1  -3  127.09   12.00 
   5  -1  -3  128.19   11.00 
  -5  -1   3  111.29   10.60 
  -5  -1   3   98.49   10.70 
  -5   1   3  120.99   11.30 
  -5   1   3  115.99   10.60 
   5   1  -3  136.19   11.00 
   3  -1  -3  265.17   16.80 
  -3  -1   3  251.77   16.70 
   3  -1  -3  231.38   16.50 
   3  -1  -3  244.58   15.90 
  -3  -1   3  205.28   16.50 
  -3   1   3  240.68   16.70 
  -3   1   3  267.17   16.30 
  -3   1   3  252.47   16.60 
   3   1  -3  262.97   16.80 
   1  -1  -3  155.28   11.80 
   1  -1  -3  178.68   11.90 
  -1   1   3  172.68   11.90 
   1   1  -3  190.18   11.60 
   1   1  -3  186.58   11.80 
  -1   1   3  184.48   12.30 
  -1  -1  -3  187.58   14.40 
   1  -1   3  211.98   14.50 
   1  -1   3  219.58   13.90 
   1   1   3  199.28   14.70 
  -1   1  -3  238.48   13.90 
  -1   1  -3  223.58   14.60 
   3  -1   3  169.48   11.20 
   3  -1   3  160.78   12.00 
  -3  -1  -3  126.39   10.50 
   3   1   3  143.69   10.80 
   3   1   3  141.29   11.60 
   5  -1   3   86.19   10.40 
   5   1   3   73.69    9.30 
   5   1   3   95.79    9.40 
   5   1   3   95.79    9.10 
  -5   1  -3   79.29    8.20 
   7  -1   3   39.20    8.20 
  -7   1  -3   39.80    5.90 
   7   1   3   39.30    6.50 
  -7   1  -3   38.80    7.80 
  -9  -1  -3   17.60    5.30 
   9  -1   3   33.90    9.50 
  -9   1  -3   12.90    6.80 
  -9   1  -3   13.00    5.00 
   9   1   3   17.10   10.00 
 -11  -1  -3    3.30    7.40 
 -11  -1  -3   10.30    5.70 
  11  -1   3   -9.10    9.40 
  11   1   3   13.20   10.90 
 -11   1  -3   11.40    7.70 
 -11   1  -3   19.20    5.80 
 -13  -1  -3   31.90    8.60 
  13  -1   3    2.40   10.90 
 -13   1  -3    2.00    6.10 
 -13   1  -3    9.60    8.30 
  15  -1   3   -8.30   10.70 
 -15  -1  -3    6.10    7.90 
 -15   1  -3    2.30    7.90 
  15   1   3   20.90   12.00 
 -17  -1  -3   -5.70    7.50 
  17  -1   3    1.90   10.90 
 -17   1  -3   -8.40    7.60 
  17   1   3  -15.70    9.90 
 -18  -2   3  -19.60    9.80 
 -18  -2   3    3.30    7.80 
  18  -2  -3    5.40   17.70 
 -18   2   3   -1.90    7.90 
 -18   2   3   16.20    7.90 
  18   2  -3    4.50   11.20 
  16  -2  -3   -9.90    8.70 
 -16  -2   3  -15.20    6.30 
 -16  -2   3  -13.30    7.20 
  16   2  -3    0.20    8.20 
 -16   2   3    5.30    8.00 
 -16   2   3    6.30    8.70 
 -14  -2   3   18.00    8.10 
  14  -2  -3   12.00    8.90 
 -14  -2   3   10.70    7.40 
  14   2  -3    3.40    7.40 
 -14   2   3   15.40    9.30 
 -14   2   3    2.30    7.30 
 -12  -2   3   11.30    7.70 
  12  -2  -3   -3.50    7.10 
 -12  -2   3   -6.00    6.50 
  12   2  -3   -3.50    6.60 
 -12   2   3    3.30    7.20 
 -12   2   3   -7.80    8.60 
 -10  -2   3   16.00   10.50 
  10  -2  -3    0.90    6.70 
 -10   2   3   10.90    6.60 
 -10   2   3   -8.40    8.70 
  10   2  -3   -1.40    5.60 
  -8  -2   3   27.10    6.00 
  -8  -2   3   13.70    6.30 
   8  -2  -3   14.40    6.40 
   8   2  -3   15.00    5.80 
  -8   2   3    9.60    9.40 
  -8   2   3    9.00    6.00 
  -6  -2   3    7.80    3.80 
   6  -2  -3   -2.50    4.30 
   6   2  -3   -0.10    3.80 
  -6   2   3    6.50    6.10 
  -6   2   3    1.20    4.50 
   6   2  -3    2.60    4.20 
   4  -2  -3   26.00    4.70 
  -4  -2   3   39.50    5.00 
  -4   2   3   23.60    4.60 
   4   2  -3   25.10    4.80 
  -4   2   3   31.50    5.10 
   4   2  -3   26.90    4.70 
  -2  -2   3   -2.20    2.30 
   2  -2  -3    9.80    2.50 
   2  -2  -3   11.50    3.00 
   2   2  -3    2.20    2.40 
  -2   2   3    9.20    2.90 
   2   2  -3   -1.50    2.20 
  -2   2   3    9.10    3.30 
   0  -2  -3   28.30    3.30 
   0  -2   3   27.80    3.40 
   0  -2  -3   19.40    3.40 
   0   2   3   28.30    3.40 
   0   2   3   27.40    4.10 
   0   2  -3   26.30    3.80 
   0   2  -3   32.60    3.50 
   2  -2   3    3.60    2.50 
   2   2   3    6.10    3.10 
   2   2   3    2.40    2.60 
   4  -2   3   17.20    4.00 
   4  -2   3   22.30    4.70 
   4   2   3   13.90    5.20 
   4   2   3   10.90    4.00 
  -4   2  -3   17.10    3.60 
   4   2   3   15.60    4.10 
  -4   2  -3   14.40    5.40 
   6  -2   3   19.30    5.70 
  -6   2  -3   11.60    4.10 
  -6   2  -3    9.90    5.40 
   6   2   3    7.80    7.90 
   6   2   3   13.40    7.10 
   8  -2   3    1.20    7.60 
  -8   2  -3    7.90    6.30 
  -8   2  -3   -1.30    4.60 
   8   2   3    7.00    5.20 
   8   2   3   -0.20    4.80 
   8   2   3   -2.50    8.30 
  10  -2   3    8.10    8.50 
 -10  -2  -3   -4.30    4.80 
 -10   2  -3   -0.90    4.60 
  10   2   3   -2.40    9.30 
 -10   2  -3   -7.20    6.70 
 -12  -2  -3   -0.70    5.90 
  12  -2   3   20.30   10.60 
 -12  -2  -3   -8.80    7.20 
  12   2   3   -9.10   10.00 
 -12   2  -3    4.70    8.20 
 -12   2  -3   -0.30    5.50 
 -14  -2  -3    9.30    7.30 
 -14  -2  -3    6.50    5.80 
  14  -2   3   -4.90   10.20 
  14   2   3    1.60   11.20 
 -14   2  -3  -10.90    7.90 
 -16  -2  -3   -7.90    7.20 
  16  -2   3   -1.40   10.70 
  16   2   3   12.70   11.10 
 -16   2  -3   -1.00    8.40 
 -17  -3   3    0.90    7.10 
  17  -3  -3    3.20    9.80 
  17   3  -3   -1.10    8.50 
 -17   3   3   -6.40    8.40 
 -17   3   3    4.60    7.80 
  15  -3  -3   -3.00    8.30 
 -15  -3   3   11.10    7.20 
  15   3  -3   -8.20    7.30 
 -15   3   3   -8.50    8.70 
 -15   3   3    2.90    7.60 
 -13  -3   3   -7.50    6.90 
  13  -3  -3    9.50    9.90 
 -13   3   3    2.50    7.40 
  13   3  -3    0.90    8.80 
 -13   3   3    6.20    9.50 
  11  -3  -3   -4.20    7.00 
 -11  -3   3   -1.50    6.60 
 -11   3   3  -10.80    8.90 
 -11   3   3    2.50    7.10 
  11   3  -3    9.60    6.60 
   9  -3  -3   11.30    7.10 
  -9   3   3    4.80    6.30 
   9   3  -3   11.00    6.30 
  -9   3   3    8.60    9.20 
  -7  -3   3   -6.80    4.30 
   7  -3  -3    2.80    5.50 
   7   3  -3    6.90    5.00 
  -7   3   3    8.90    5.60 
   7   3  -3    1.00    4.40 
   5  -3  -3   13.10    5.00 
  -5  -3   3   17.30    4.70 
  -5   3   3   24.10    6.00 
  -5   3   3   17.50    5.40 
   5   3  -3   23.80    4.90 
   5   3  -3   29.90    8.00 
  -3   3   3    5.40    3.30 
   3   3  -3   -5.70    2.60 
   3   3  -3   -1.20    2.90 
  -3   3   3    2.40    3.70 
  -3   3   3    3.90    3.90 
  -1  -3   3   24.20    3.20 
  -1  -3   3   20.20    3.40 
  -1   3   3   17.00    3.70 
   1   3  -3   24.00    3.50 
  -1   3   3   19.10    3.90 
   1  -3   3    1.40    2.50 
  -1   3  -3    3.40    2.40 
   1   3   3   -1.10    3.00 
   1   3   3    2.40    2.60 
  -1   3  -3   -3.20    3.30 
   3  -3   3   10.40    3.60 
   3  -3   3    9.70    3.30 
  -3   3  -3    9.10    3.20 
   3   3   3    8.30    3.30 
  -3   3  -3    1.70    4.30 
   3   3   3    2.70    3.50 
   5  -3   3   -1.40    6.50 
   5  -3   3    4.40    8.50 
   5   3   3    6.30    4.00 
  -5   3  -3   11.60    4.00 
   5   3   3    6.10    4.10 
   7  -3   3    1.90    5.90 
  -7   3  -3    7.90    4.60 
   7   3   3    7.10    7.40 
  -7   3  -3   -1.10    5.90 
   7   3   3   -0.60    4.30 
   7   3   3   -0.60    4.50 
   9  -3   3   16.00    7.90 
   9   3   3   13.30    5.70 
   9   3   3   16.60    9.30 
  -9   3  -3   11.30    7.40 
  -9   3  -3   20.20    5.30 
   9   3   3   16.60    6.40 
 -11  -3  -3   -7.30    5.30 
  11  -3   3   -4.80    8.30 
 -11   3  -3   -9.00    5.20 
  11   3   3   -4.90   10.20 
 -11   3  -3    2.10    7.50 
 -13  -3  -3    6.40    6.00 
 -13  -3  -3   14.70    9.10 
  13  -3   3    1.40    9.50 
 -13   3  -3    8.60    8.80 
  13   3   3   19.20   11.70 
 -13   3  -3    7.30    6.00 
 -15  -3  -3   -1.50    7.10 
  15  -3   3    5.90   10.70 
  15   3   3   -4.10   10.40 
 -15   3  -3   -0.90    8.90 
 -17  -3  -3    4.90    7.50 
 -17   3  -3   -5.20    8.10 
  17   3   3    9.80   10.60 
 -18  -4   3   -6.30    7.00 
  18  -4  -3    5.90    9.50 
 -18   4   3   -8.50    8.00 
 -18   4   3   -7.80   14.50 
  18   4  -3    9.60   12.90 
  16  -4  -3    0.30    9.60 
 -16  -4   3    1.60    7.60 
 -16   4   3    5.80    7.90 
 -16   4   3    9.40    9.60 
  16   4  -3   13.90    8.70 
  14  -4  -3   -0.70    8.80 
 -14  -4   3   13.80    7.80 
 -14   4   3   12.10    7.80 
 -14   4   3    5.80   11.90 
  14   4  -3   13.10    7.90 
  12  -4  -3   16.70    8.60 
 -12  -4   3   16.50    7.90 
 -12   4   3   15.70    7.70 
  12   4  -3   18.90    7.80 
 -12   4   3   19.00   10.70 
  10  -4  -3   19.80    8.30 
 -10   4   3   29.70   10.90 
 -10   4   3   16.40    7.10 
  10   4  -3   15.00    6.50 
   8  -4  -3   50.49    8.80 
  -8   4   3   41.40   10.10 
   8   4  -3   60.99    8.40 
  -8   4   3   57.49    8.40 
   8   4  -3   53.29    9.00 
   6  -4  -3   68.19    8.30 
  -6  -4   3   45.20    7.10 
  -6   4   3   67.09   10.20 
   6   4  -3   79.09    9.40 
  -6   4   3   56.29    7.60 
   6   4  -3   48.70    7.50 
   4  -4  -3  108.89   10.60 
  -4  -4   3  123.89   10.50 
   4   4  -3  121.79   10.00 
  -4   4   3  120.39   12.20 
   4   4  -3  116.39   10.50 
  -4   4   3   90.19   11.10 
  -2  -4   3   78.99    7.10 
  -2   4   3   70.99    8.60 
  -2   4   3   65.69    8.00 
   2   4  -3   75.59    7.60 
   0  -4   3  160.08   12.90 
   0  -4   3  166.98   11.60 
   0  -4   3  162.48   11.30 
   0   4   3  153.78   12.60 
   0   4  -3  173.18   11.50 
   0   4   3  145.99   12.00 
   0   4  -3  166.48   12.40 
   2  -4   3   45.30    5.40 
   2  -4   3   54.99    6.20 
   2   4   3   50.99    6.80 
  -2   4  -3   46.10    5.80 
   2   4   3   47.00    6.10 
  -2   4  -3   51.59    6.50 
   4  -4   3  111.49   11.20 
   4  -4   3  121.59   11.90 
  -4   4  -3  115.39   12.40 
   4   4   3  118.29   10.60 
  -4   4  -3  116.89   10.20 
   4   4   3  115.49   11.10 
   6  -4   3   32.50    6.60 
   6  -4   3   31.20    5.70 
  -6   4  -3   34.50    5.50 
   6   4   3   23.60    5.80 
   6   4   3   25.00    7.30 
   6   4   3   21.70    5.40 
  -6   4  -3   20.80    6.80 
   8  -4   3   20.80    7.90 
   8  -4   3   40.20    6.50 
   8   4   3   24.20    6.90 
  -8   4  -3   23.20    7.70 
   8   4   3   27.50    6.20 
  -8   4  -3   22.30    6.10 
   8   4   3   12.00    9.00 
  10  -4   3    6.70    7.80 
  10   4   3   13.80    5.90 
  10   4   3    5.60    6.00 
  10   4   3   10.20    8.90 
 -10   4  -3   -0.10    7.80 
 -10   4  -3    9.10    5.60 
 -12  -4  -3   -7.40    6.00 
  12  -4   3   -2.00    9.00 
 -12   4  -3   12.20    6.10 
  12   4   3    5.80   10.10 
 -12   4  -3   -1.30    8.40 
 -14  -4  -3   -7.10    6.20 
 -14  -4  -3    6.30    7.40 
  14  -4   3   12.00    9.80 
 -14   4  -3   -2.70    8.80 
  14   4   3   16.00   10.60 
  16  -4   3   -0.40   10.40 
 -16  -4  -3   -4.60    7.00 
 -16   4  -3   -1.60    8.80 
  16   4   3   -9.80    9.40 
 -17  -5   3    6.80    8.50 
  17  -5  -3   14.90   10.20 
 -17   5   3    9.70    9.40 
  17   5  -3    0.30    8.20 
 -17   5   3   22.10    8.60 
  15  -5  -3    8.60    9.30 
 -15  -5   3    9.90    7.20 
 -15   5   3    3.20    7.80 
 -15   5   3   14.70   10.10 
  15   5  -3   10.20    8.40 
 -13  -5   3   21.80    8.70 
  13  -5  -3    9.20    9.40 
  13   5  -3   14.40    7.70 
 -13   5   3   20.90    8.30 
  11  -5  -3   49.10   10.20 
  11   5  -3   45.10    8.70 
  11   5  -3   51.09   10.20 
 -11   5   3   50.39   11.50 
 -11   5   3   36.20   13.60 
   9  -5  -3   63.49   10.20 
  -9   5   3   58.19   11.90 
  -9   5   3   62.89    9.40 
   9   5  -3   66.59    9.20 
   9   5  -3   67.59   10.20 
  -7  -5   3  147.39   13.50 
   7  -5  -3  133.79   14.30 
  -7   5   3  118.79   14.10 
   7   5  -3  119.69   12.90 
   7   5  -3  123.29   13.00 
  -7   5   3  130.29   13.50 
  -5  -5   3  113.79   11.50 
   5  -5  -3  121.69   11.60 
   5   5  -3  143.59   11.50 
   5   5  -3  104.59   11.40 
  -5   5   3  100.29   13.60 
  -5   5   3  120.29   12.60 
  -3  -5   3  213.48   16.60 
  -3   5   3  203.88   16.60 
  -3   5   3  236.28   17.10 
   3   5  -3  222.58   15.60 
   3   5  -3  235.58   16.30 
  -1  -5   3  137.99   11.10 
  -1  -5   3  153.18   11.00 
  -1   5   3  148.09   12.20 
  -1   5   3  150.88   12.10 
   1   5  -3  137.69   11.10 
   1  -5   3  271.27   19.00 
   1  -5   3  298.37   18.90 
   1   5   3  284.67   20.00 
   1   5   3  282.77   19.50 
  -1   5  -3  277.57   20.00 
  -1   5  -3  293.67   18.90 
   3  -5   3  108.89   11.30 
   3   5   3  112.29   10.80 
   3   5   3  126.99   11.80 
  -3   5  -3  123.39   10.10 
   5  -5   3  205.88   16.60 
   5  -5   3  221.38   16.30 
  -5   5  -3  204.48   16.00 
  -5   5  -3  220.78   18.80 
   5   5   3  198.48   16.70 
   5   5   3  231.08   16.70 
   7  -5   3   44.20    6.60 
   7  -5   3   37.40    7.40 
  -7   5  -3   32.80    8.30 
   7   5   3   38.30    6.90 
   7   5   3   19.80    7.50 
  -7   5  -3   40.00    6.60 
   9  -5   3   72.09   11.20 
   9  -5   3   91.89   11.60 
  -9   5  -3  129.59   16.70 
  -9   5  -3  101.99   11.40 
   9   5   3   62.39   11.80 
   9   5   3  126.49   12.10 
   9   5   3  113.89   13.00 
 -11   5  -3    2.20    5.90 
  11   5   3    1.50    8.20 
  11   5   3    4.80    5.60 
  11   5   3   10.30    6.90 
  13  -5   3   23.60    9.90 
  13   5   3   22.00   13.90 
 -13   5  -3   22.10    9.80 
 -15  -5  -3   14.30    7.50 
  15  -5   3   12.30   10.00 
  15   5   3    5.20    9.80 
 -15   5  -3    5.90    9.30 
  17  -5   3   -8.60    9.60 
 -17  -5  -3   -9.70    6.40 
 -17   5  -3   25.10    9.60 
  17   5   3    1.30    9.60 
  16  -6  -3    2.90    8.90 
 -16   6   3    5.40    7.70 
  16   6  -3    5.90    8.20 
 -16   6   3  -10.50    9.00 
  14  -6  -3    5.80    8.80 
 -14  -6   3   -5.40    7.00 
 -14   6   3    2.70    9.80 
  14   6  -3   -2.80    7.30 
 -14   6   3    7.80    7.90 
 -12   6   3   14.00    7.70 
  12   6  -3    6.10    6.20 
 -12   6   3   25.30   14.90 
  10  -6  -3   -5.20    6.80 
  10   6  -3   -2.10    6.00 
  10   6  -3   -5.70    5.40 
 -10   6   3   -5.00    9.40 
 -10   6   3   -5.70    7.20 
   8  -6  -3   31.10    7.70 
   8   6  -3   30.50    7.00 
  -8   6   3   17.70   10.20 
   8   6  -3   31.90    7.30 
  -8   6   3   35.60    8.10 
   6  -6  -3    0.80    5.20 
  -6  -6   3    5.20    5.00 
  -6   6   3    0.40    7.40 
   6   6  -3   -1.60    4.20 
   6   6  -3    6.40    5.10 
  -6   6   3    3.50    6.00 
   4  -6  -3   65.29    8.50 
  -4  -6   3   73.79    9.10 
  -4   6   3   74.99    9.10 
  -4   6   3   64.99    9.00 
   4   6  -3   86.39    8.90 
   4   6  -3   88.79   10.50 
   2   6  -3    2.20    3.50 
  -2   6   3   -2.40    4.40 
  -2   6   3    3.60    4.80 
   0  -6   3   78.89    8.90 
   0  -6   3  100.49    8.40 
   0   6  -3   94.09    8.90 
   0   6   3  100.49   10.00 
   0   6  -3   94.19   10.20 
   2  -6   3   16.50    4.40 
   2  -6   3   19.50    4.20 
  -2   6  -3   20.70    5.90 
   2   6   3   18.80    4.70 
   2   6   3    4.70    8.50 
  -2   6  -3   16.30    4.10 
   4  -6   3   66.59    8.80 
   4  -6   3   68.79    8.10 
  -4   6  -3   71.49    9.40 
  -4   6  -3   81.89    9.20 
   4   6   3   74.39    9.80 
   6  -6   3   10.50    5.10 
   6  -6   3   14.70    5.70 
  -6   6  -3   16.70    7.60 
   6   6   3   15.90    5.30 
  -6   6  -3   24.10    5.60 
   6   6   3    8.90    5.30 
   8  -6   3   42.80    8.40 
   8  -6   3   46.20    7.10 
   8   6   3   38.20    7.70 
   8   6   3   30.30    8.10 
  -8   6  -3   30.20    9.30 
  -8   6  -3   28.00    7.00 
   8   6   3   39.10    7.00 
  10  -6   3  -11.70    6.90 
  10  -6   3   11.80    5.20 
  10   6   3   -7.00    7.90 
  10   6   3    0.20    4.80 
 -10   6  -3   -8.00    5.70 
 -10   6  -3   12.10    8.50 
  10   6   3    3.70    6.30 
  12  -6   3   -6.50    8.30 
 -12   6  -3    7.10   10.40 
  12   6   3    1.20    9.00 
 -12   6  -3   12.30    9.30 
  12   6   3    8.30    6.60 
  14  -6   3   -6.80    8.80 
 -14   6  -3    9.40    8.90 
  14   6   3   -2.00    9.40 
 -16  -6  -3   -7.80    6.70 
 -16   6  -3   -0.70   11.00 
  16   6   3    3.70    8.60 
  17  -7  -3    6.60    8.70 
 -17  -7   3   -3.80    7.50 
 -17   7   3  -13.20    9.60 
 -15  -7   3    2.20   11.00 
  15  -7  -3   -4.60    8.20 
 -15   7   3    8.20    8.10 
  15   7  -3    1.70    7.50 
 -15   7   3   -7.60   10.10 
  13  -7  -3   -7.80    7.90 
  13   7  -3    4.70    6.20 
 -13   7   3   13.40   11.20 
 -13   7   3    0.00    8.00 
  13   7  -3   -0.80    7.20 
  11  -7  -3   -1.50    7.10 
  11   7  -3    6.10    6.40 
  11   7  -3    0.60    6.00 
 -11   7   3  -14.90    7.10 
 -11   7   3    8.10   13.20 
   9  -7  -3    9.10    6.70 
  -9   7   3   16.60    9.90 
   9   7  -3    5.60    6.00 
  -9   7   3    7.50    7.60 
   9   7  -3    6.70    6.20 
   7  -7  -3   -1.40    5.40 
  -7  -7   3    8.10    5.60 
   7   7  -3    0.10    5.00 
  -7   7   3    4.10    6.60 
   7   7  -3   -2.40    4.80 
  -7   7   3   -4.10    8.00 
  -5  -7   3   -0.20    4.90 
   5  -7  -3    9.00    4.70 
  -5   7   3   17.30    7.40 
  -5   7   3   15.30    6.90 
   5   7  -3   10.20    4.90 
   5   7  -3    1.20    4.30 
  -3  -7   3    4.70    4.10 
  -3   7   3    7.60    5.70 
   3   7  -3    6.70    3.90 
   3   7  -3    1.90    3.90 
  -3   7   3    9.60    5.90 
  -1  -7   3    2.80    3.90 
  -1   7   3    5.90    5.10 
  -1   7   3    8.50    5.20 
   1   7  -3   12.00    4.10 
   1   7  -3    0.60    4.20 
   1  -7   3   18.80    4.10 
   1  -7   3   10.40    4.20 
  -1   7  -3    7.30    5.60 
  -1   7  -3   13.70    4.30 
   1   7   3   10.90    5.50 
   1   7   3    9.20    4.90 
   3  -7   3   -3.20    4.30 
   3  -7   3    4.00    3.70 
  -3   7  -3   -4.50    6.10 
  -3   7  -3    8.30    4.70 
   3   7   3   -4.30    4.70 
   5  -7   3   34.70    5.90 
   5  -7   3   22.70    6.10 
  -5   7  -3   20.60    7.90 
   5   7   3   18.00    5.80 
   5   7   3   13.70    5.60 
  -5   7  -3    7.70    5.50 
   7  -7   3    2.60    6.10 
   7  -7   3    6.70    4.90 
   7   7   3   -2.80    4.80 
   7   7   3   -1.60    5.00 
  -7   7  -3   -3.10    7.30 
  -7   7  -3   -3.40    5.20 
   9  -7   3   26.40    5.80 
   9  -7   3    5.60    7.10 
   9   7   3   12.20    7.80 
  -9   7  -3   14.90    6.40 
   9   7   3   18.00    6.50 
  -9   7  -3    9.60    8.40 
   9   7   3   20.10    6.10 
  11  -7   3   18.20    7.60 
  11  -7   3    8.60    8.10 
  11   7   3    8.20    5.60 
 -11   7  -3  -10.40    5.90 
  11   7   3   -0.90    8.20 
 -11   7  -3   15.20    9.00 
  11   7   3   -2.00    6.20 
  13  -7   3   11.50    9.00 
  13   7   3   21.70    6.50 
 -13   7  -3    6.60    8.90 
  13   7   3   10.70    7.30 
  13   7   3    0.70   10.30 
  15  -7   3   10.00    9.40 
  15   7   3   -4.60    8.80 
 -15   7  -3   -1.80    8.80 
 -16  -8   3   24.90    8.40 
  16  -8  -3    7.30    8.70 
 -16   8   3   15.60   10.90 
  16   8  -3    0.80    7.40 
  14  -8  -3   -7.80    7.60 
 -14   8   3    4.00    7.90 
  14   8  -3   12.50    7.80 
 -14   8   3   -3.00   10.90 
  12  -8  -3    9.10    7.70 
 -12   8   3   17.50   11.60 
 -12   8   3   16.30    8.50 
  12   8  -3   13.80    7.30 
  12   8  -3   25.20    7.90 
  10  -8  -3    2.70    6.80 
  10   8  -3    0.80    5.80 
  10   8  -3    7.30    6.10 
 -10   8   3    5.10    7.50 
   8  -8  -3   50.19    8.20 
  -8   8   3   32.00   10.80 
   8   8  -3   65.89    8.80 
   8   8  -3   57.49    9.20 
  -8   8   3   58.39   10.70 
   6  -8  -3    4.00    5.00 
  -6  -8   3   10.50    5.50 
  -6   8   3    8.50    7.20 
   6   8  -3    5.90    5.30 
   6   8  -3   -1.90    4.70 
  -6   8   3    2.80    8.10 
   4  -8  -3   72.49    8.90 
  -4  -8   3   82.09   10.00 
   4   8  -3   84.89   10.30 
   4   8  -3   93.49   10.60 
  -4   8   3   72.49   10.00 
  -4   8   3   73.19   10.00 
  -2  -8   3    6.40    4.00 
  -2   8   3    3.50    6.10 
  -2   8   3    7.60    5.90 
   2   8  -3   11.80    4.80 
   0  -8   3   80.19    9.20 
   0   8   3   90.09   11.60 
   0   8  -3   64.59    8.30 
   0   8  -3   80.19    9.50 
   0   8   3   79.69   10.90 
   2  -8   3   23.40    6.40 
   2  -8   3    3.90    4.50 
   2   8   3    6.10    5.60 
  -2   8  -3   13.10    6.70 
  -2   8  -3   14.30    4.80 
   2   8   3    8.80    5.70 
   4  -8   3   52.69    7.50 
   4  -8   3   52.59    7.00 
   4   8   3   46.40    7.70 
   4   8   3   46.30    7.90 
  -4   8  -3   47.30    7.20 
  -4   8  -3   54.89    8.90 
   6  -8   3    0.00    5.60 
   6  -8   3    9.90    4.80 
  -6   8  -3   14.10    7.90 
  -6   8  -3    4.60    5.70 
   6   8   3    5.80    5.80 
   6   8   3    4.50    5.40 
   8  -8   3   25.30    5.50 
   8  -8   3   21.70    7.80 
   8   8   3   12.40    6.20 
  -8   8  -3   21.00    9.20 
   8   8   3    7.40    6.40 
  -8   8  -3   26.80    6.70 
  10  -8   3   11.20    7.90 
  10  -8   3    9.70    5.90 
 -10   8  -3   -0.50    8.60 
  10   8   3    7.60    6.80 
  10   8   3    7.80    5.30 
  10   8   3    5.50    8.00 
  12  -8   3   12.50    8.80 
 -12   8  -3    8.40    9.10 
  12   8   3   -1.40    8.30 
  12   8   3   -0.80    6.80 
  14  -8   3   -6.90    8.60 
  14   8   3  -12.40    7.80 
 -14   8  -3  -11.50    8.80 
  14   8   3    2.30    6.50 
  15  -9  -3    6.30    8.50 
 -15   9   3    5.30    7.90 
  15   9  -3    2.50    7.00 
 -15   9   3   11.80   10.80 
  13  -9  -3    5.20    8.00 
 -13   9   3    0.20   11.10 
  13   9  -3   12.60    7.10 
 -13   9   3    1.10    8.00 
  13   9  -3   14.30    7.40 
  11  -9  -3   23.20    8.00 
 -11   9   3   14.00   11.20 
  11   9  -3   28.50    7.90 
  11   9  -3   23.80    7.50 
 -11   9   3   13.20    8.10 
   9  -9  -3    2.80    6.40 
  -9   9   3   17.70   12.30 
   9   9  -3   19.50    6.90 
  -9   9   3    4.10    8.10 
   9   9  -3   17.00    6.80 
   7  -9  -3   62.39    8.00 
   7   9  -3   62.29    9.40 
  -7   9   3   47.10   11.10 
   7   9  -3   65.49    8.80 
  -7   9   3   86.49   16.50 
   5  -9  -3   30.00    5.70 
  -5  -9   3   21.70    6.20 
   5   9  -3   25.70    5.80 
  -5   9   3   19.40    8.10 
   5   9  -3   26.60    6.20 
  -5   9   3   12.50    8.00 
  -3  -9   3   96.99   11.70 
  -3   9   3  132.39   14.50 
   3   9  -3  140.89   11.80 
   3   9  -3  125.39   12.50 
  -3   9   3  113.99   14.30 
  -1  -9   3   35.40    5.60 
  -1  -9   3   31.90    5.70 
   1   9  -3   33.80   10.80 
  -1   9   3   30.80   11.60 
   1   9  -3   20.30    5.50 
  -1   9   3   32.20    7.20 
   1  -9   3  154.48   13.20 
  -1   9  -3  158.48   13.50 
  -1   9  -3  152.58   15.00 
   1   9   3  158.18   15.10 
   1   9   3  144.79   14.40 
   3  -9   3   14.50    5.20 
   3   9   3   14.00    5.80 
  -3   9  -3   22.30    7.50 
  -3   9  -3    2.00    5.00 
   3   9   3   21.20    6.10 
   5  -9   3   96.49   12.50 
   5  -9   3  106.39   12.30 
  -5   9  -3  102.09   12.00 
   5   9   3  108.19   12.90 
  -5   9  -3  134.29   15.30 
   5   9   3  114.19   12.90 
   7  -9   3    4.20    6.40 
   7  -9   3    7.40    4.60 
  -7   9  -3    6.40    8.20 
  -7   9  -3    6.70    5.80 
   7   9   3    8.10    5.90 
   7   9   3   -1.70    5.50 
   9  -9   3   45.80    7.90 
   9  -9   3   50.79    9.40 
   9   9   3   42.50    8.60 
  -9   9  -3   31.80    7.70 
  -9   9  -3   34.30    9.70 
  11  -9   3   10.00    8.10 
  11   9   3    7.10    8.70 
  11   9   3    0.60    7.70 
 -11   9  -3    8.10    9.00 
  11   9   3    1.20    6.30 
  13  -9   3   20.70    9.20 
  13   9   3   14.70    6.00 
  13   9   3    7.60    8.70 
  13   9   3   24.50    8.20 
 -13   9  -3    6.50    9.60 
  15  -9   3    6.50    8.90 
 -15   9  -3    5.60    9.00 
  15   9   3    8.50    8.70 
  14 -10  -3    6.00    7.90 
 -14  10   3    8.70   11.20 
 -14  10   3    2.40    7.60 
  14  10  -3  -16.70    5.90 
  14  10  -3    3.00    6.90 
  12 -10  -3    6.10    7.40 
 -12  10   3  -13.10   10.50 
  12  10  -3   10.50    6.70 
  12  10  -3   -5.90    6.10 
 -12  10   3    0.10    8.10 
  10  10  -3    4.60    6.30 
  10  10  -3    9.90    6.70 
 -10  10   3   -0.60    7.90 
 -10  10   3    5.20   10.90 
   8 -10  -3    1.90    5.80 
   8  10  -3    6.40    5.90 
   8  10  -3   -0.80    5.20 
  -8  10   3    2.00    8.00 
  -8  10   3   -0.40    9.40 
   6 -10  -3    7.70    5.20 
   6  10  -3   12.90    6.00 
  -6  10   3   10.40    7.60 
   6  10  -3    5.60    5.90 
  -6  10   3   12.80    8.40 
  -4 -10   3   -0.40    4.70 
   4  10  -3    2.50    4.60 
   4  10  -3    7.40    5.40 
  -4  10   3    3.20    7.30 
  -4  10   3    1.90    7.50 
  -2 -10   3   13.10    4.60 
  -2  10   3    6.90    6.50 
   2  10  -3    1.20    4.50 
   2  10  -3    2.80    4.90 
  -2  10   3   12.70    7.00 
   0 -10   3   13.40    4.80 
   0 -10   3   10.10    5.20 
   0  10  -3   11.20    5.10 
   0  10  -3    0.10    5.80 
   0  10   3   13.20    6.70 
   0  10   3   13.00    6.40 
   2 -10   3    9.50    5.30 
   2 -10   3   16.10    5.20 
  -2  10  -3   12.80    5.10 
   2  10   3    1.70    6.00 
   2  10   3    7.50    5.60 
  -2  10  -3   11.40    7.10 
   4 -10   3    6.70    5.40 
  -4  10  -3   13.10    5.80 
   4  10   3   10.20    6.40 
   4  10   3    9.70    6.10 
  -4  10  -3   11.90    7.50 
   6 -10   3   -1.10    6.10 
   6  10   3    8.20    6.10 
   6  10   3   12.60    5.70 
  -6  10  -3  -13.20    7.60 
   8 -10   3    1.60    6.90 
   8  10   3   11.90    6.30 
  -8  10  -3    3.70    8.60 
  -8  10  -3    1.80    6.00 
   8  10   3   11.00    6.30 
  10 -10   3    2.10    7.30 
  10  10   3   -8.20    5.80 
 -10  10  -3    2.20    8.80 
  10  10   3   -4.60    6.30 
  12 -10   3   -3.80    7.70 
  12  10   3   12.10    5.70 
  12  10   3   12.70    7.20 
 -12  10  -3    9.60    9.60 
  14 -10   3   -9.50    8.00 
  14  10   3    0.50    7.80 
  14  10   3   -6.60    6.40 
  14  10   3   -5.10    5.10 
 -14  10  -3    8.80    9.40 
  13 -11  -3   -0.90    7.30 
 -13  11   3    1.20    7.70 
 -13  11   3   -0.30   10.90 
  13  11  -3    1.30    6.10 
  13  11  -3   -0.50    6.40 
  11 -11  -3    8.50    7.00 
 -11  11   3    9.50    8.30 
  11  11  -3   -4.60    6.20 
 -11  11   3    8.10   10.90 
  11  11  -3    0.40    6.30 
   9 -11  -3    2.30    6.40 
  -9  11   3   14.10    8.80 
  -9  11   3    8.50   10.30 
   9  11  -3    2.20    5.80 
   9  11  -3   10.90    6.70 
   7 -11  -3    2.30    5.50 
   7  11  -3    1.20    5.60 
  -7  11   3   13.10    9.40 
   7  11  -3    3.00    5.40 
  -7  11   3    9.30    8.10 
   5 -11  -3    8.40    5.30 
  -5  11   3   13.80   10.70 
   5  11  -3    4.40    5.50 
   5  11  -3    9.50    5.30 
  -5  11   3   18.60    8.60 
  -3 -11   3   -0.20    4.60 
   3  11  -3    7.50    5.30 
  -3  11   3  -10.10    6.90 
  -3  11   3   -9.70    6.70 
   3  11  -3   -3.00    4.70 
  -1 -11   3   -0.90    4.50 
  -1  11   3    2.90    7.10 
   1  11  -3   12.50    5.80 
   1  11  -3   16.40    5.80 
  -1  11   3   -1.10    6.40 
   1 -11   3    2.60    5.40 
   1 -11   3   -3.30    4.30 
   1  11   3    8.00    6.20 
  -1  11  -3   -6.40    5.00 
  -1  11  -3    8.70    7.00 
   1  11   3   -1.60    6.30 
   3 -11   3    3.00    5.60 
   3 -11   3   13.20    5.20 
   3  11   3   12.50    6.20 
   3  11   3   13.80    6.90 
  -3  11  -3    6.50    7.90 
  -3  11  -3   -2.40    5.30 
   5 -11   3    9.20    6.70 
  -5  11  -3    2.90    5.80 
  -5  11  -3    0.30    8.00 
   5  11   3   -1.30    5.80 
   5  11   3    4.90    5.70 
   7 -11   3   -5.20    6.50 
   7  11   3    9.60    6.30 
  -7  11  -3    1.10    6.30 
  -7  11  -3   -3.80    8.30 
   7  11   3    3.80    5.70 
   9 -11   3   13.20    7.70 
  -9  11  -3   13.10    9.40 
  11 -11   3   -0.20    7.70 
  11  11   3    7.80    6.90 
 -11  11  -3    2.50    9.30 
  11  11   3    6.70    5.20 
  13  11   3   -0.60    6.00 
  13  11   3    2.90    5.10 
 -13  11  -3    4.00   10.20 
  12 -12  -3    7.60    7.50 
  12  12  -3    9.30    6.40 
 -12  12   3   27.00   11.80 
  12  12  -3    3.60    6.20 
 -12  12   3  -10.20    7.50 
  10 -12  -3   -4.20    6.30 
 -10  12   3   -1.50   10.60 
  10  12  -3    0.70    6.20 
 -10  12   3   18.00    8.20 
  10  12  -3    6.20    6.30 
   8 -12  -3   16.10    6.40 
  -8  12   3   -5.80    7.70 
   8  12  -3    5.00    6.40 
  -8  12   3    4.30   10.00 
   6 -12  -3    7.50    5.40 
  -6  12   3   -1.70    7.80 
   6  12  -3    2.70    5.80 
   6  12  -3   -6.30    5.00 
  -6  12   3   -8.90    8.70 
   4  12  -3   17.60    6.40 
  -4  12   3   20.50    8.90 
   4  12  -3   18.60    6.30 
  -4  12   3   23.30    8.90 
  -2 -12   3    7.20    5.30 
   2  12  -3    1.00    5.80 
  -2  12   3   -0.30    7.10 
   2  12  -3   -3.00    5.00 
   2  12  -3   -6.10    5.00 
  -2  12   3    2.00    8.30 
   0 -12   3    9.80    6.10 
   0 -12   3   23.50    6.30 
   0  12  -3   16.90    6.70 
   0  12   3   12.70    7.60 
   0  12  -3   15.50    6.20 
   0  12   3   18.50    7.90 
   2 -12   3    4.20    4.90 
   2 -12   3   -0.20    5.50 
  -2  12  -3   -0.90    7.40 
   2  12   3   -1.60    5.90 
  -2  12  -3    3.40    6.20 
   2  12   3  -10.20    6.30 
   4 -12   3   19.50    6.10 
   4 -12   3    9.90    8.30 
   4  12   3   10.30    6.40 
  -4  12  -3   16.50    6.80 
   4  12   3   22.00    7.50 
  -4  12  -3   20.60    9.20 
   6 -12   3    0.30    6.30 
  -6  12  -3    1.60    8.80 
   6  12   3   -5.00    6.30 
   6  12   3    7.00    6.00 
   8 -12   3    4.50    7.40 
   8  12   3    2.60    6.20 
  -8  12  -3    1.10    9.00 
  10 -12   3   -2.70    7.20 
  10  12   3  -12.40    5.30 
 -10  12  -3    5.90    9.50 
  10  12   3    6.10    5.40 
  12  12   3   -1.10    4.90 
  12  12   3    4.90    6.50 
 -12  12  -3    6.30   10.60 
  11 -13  -3   -0.10    6.60 
 -11  13   3  -15.10   10.50 
 -11  13   3   -1.20    7.10 
  11  13  -3    1.80    5.00 
  11  13  -3    9.80    6.30 
   9 -13  -3    2.80    5.70 
  -9  13   3   -8.00    7.40 
   9  13  -3    4.70    5.80 
   9  13  -3    3.00    6.20 
  -9  13   3  -18.20    9.90 
   7 -13  -3    7.00    5.70 
  -7  13   3    0.40    9.50 
   7  13  -3    3.40    6.40 
  -7  13   3   15.20    8.10 
   7  13  -3    1.30    6.50 
  -5  13   3   -9.00    8.30 
   5  13  -3    7.40    6.00 
   5  13  -3   -5.30    5.00 
  -5  13   3   11.10    8.10 
  -3  13   3   21.30    9.00 
   3  13  -3   10.00    5.60 
  -3  13   3   14.50    8.10 
   3  13  -3    2.90    5.60 
   3  13  -3    7.50    7.90 
   1  13  -3   11.90    6.40 
   1  13  -3  -10.70    4.90 
  -1  13   3   -3.60    6.80 
  -1  13   3   -0.40    7.60 
   1  13   3   10.80    7.20 
  -1  13  -3    0.50    5.50 
  -1  13  -3    8.70    7.10 
   1  13   3    6.90    7.60 
   3 -13   3    2.70    6.10 
  -3  13  -3   -9.40   11.50 
   3  13   3   -4.10    5.70 
   3  13   3   -5.30    6.80 
   5 -13   3   15.90    7.20 
   5  13   3   13.30    6.60 
  -5  13  -3   14.20    9.10 
   5  13   3   18.40    6.90 
   7 -13   3   11.20    7.10 
   7  13   3    2.20    6.40 
   7  13   3    5.50    5.80 
  -7  13  -3   -2.00    9.00 
   9 -13   3   10.20    7.40 
   9  13   3   -5.60    5.80 
  -9  13  -3    3.90    9.70 
   9  13   3    1.60    5.80 
  11  13   3    1.60    6.60 
  11  13   3    2.90    5.20 
 -11  13  -3   -6.70    9.60 
  10 -14  -3   10.80    6.50 
 -10  14   3   18.90   17.50 
 -10  14   3   -7.10    9.60 
  10  14  -3    6.90    6.40 
   8 -14  -3   -0.10    5.40 
  -8  14   3   -9.50    7.60 
   8  14  -3   12.60   11.40 
   8  14  -3   -4.60    6.00 
  -8  14   3    3.20   10.00 
   6  14  -3   14.80    6.90 
  -6  14   3    6.80    8.20 
   6  14  -3   17.70    7.90 
  -6  14   3   14.70   10.00 
   4  14  -3    1.10    5.20 
  -4  14   3   -5.50    8.60 
   4  14  -3    0.60    6.20 
  -4  14   3    2.90    7.50 
   2  14  -3    9.40    6.20 
  -2  14   3   10.90    7.50 
   2  14  -3    8.00    6.00 
   2  14  -3    7.50    5.90 
  -2  14   3   27.50    9.00 
   0  14   3   -5.80    6.00 
   0  14  -3   18.70    8.70 
   0  14  -3   -0.90    6.80 
   0  14   3    3.00    7.90 
   2 -14   3    3.20    6.40 
   2  14   3   -4.00    7.20 
  -2  14  -3    1.40    7.80 
   2  14   3    6.50    6.50 
   4 -14   3   -0.10    6.30 
   4  14   3   -3.30    6.80 
   4  14   3    5.80    6.00 
  -4  14  -3    0.00    8.20 
   6 -14   3   10.10    7.10 
  -6  14  -3   15.20    9.50 
   6  14   3   10.80    6.80 
   6  14   3   -0.10    5.50 
   8 -14   3   -6.50    6.80 
  -8  14  -3   -3.70    9.30 
   8  14   3   -7.70    5.70 
   8  14   3   -0.60    5.70 
  10 -14   3   21.70    9.10 
 -10  14  -3   -5.10    9.40 
  10  14   3    0.00    6.10 
  10  14   3   -2.90    5.20 
   9 -15  -3    6.30    6.00 
  -9  15   3   -0.50    9.90 
   9  15  -3   -7.90    5.50 
   7  15  -3   -2.40    5.90 
  -7  15   3    0.60   10.00 
   5  15  -3    4.40    6.30 
  -5  15   3   20.50    8.60 
  -5  15   3   -7.60    9.10 
  -3  15   3  -11.30    8.50 
   3  15  -3   12.70    6.80 
  -3  15   3   -0.20    7.60 
   3  15  -3   -2.20    5.40 
   1  15  -3   -1.30    7.90 
  -1  15   3    9.90    7.60 
  -1  15   3   16.70    8.90 
   1  15  -3    0.80    6.30 
   1  15   3    0.10    6.70 
  -1  15  -3  -10.70    6.90 
   1  15   3  -12.30    7.50 
   3 -15   3    9.70    6.90 
  -3  15  -3   -0.20    8.10 
   3  15   3   -0.40   14.40 
   3  15   3    4.10    7.40 
   5 -15   3    2.60    6.50 
   5  15   3   -6.10    5.60 
  -5  15  -3   15.40    9.00 
   5  15   3   -5.20    6.50 
   7 -15   3    9.80    7.20 
   7  15   3   -1.00    5.80 
  -7  15  -3    5.90    9.60 
   7  15   3   11.20    6.60 
  -6  16   3    9.50   15.10 
   6  16  -3   -7.00    6.00 
  -6  16   3   -3.20    7.70 
  -4  16   3   20.90   10.00 
  -4  16   3   19.40    8.20 
   4  16  -3    0.10    6.30 
  -2  16   3    7.00    7.40 
  -2  16   3    0.80    8.80 
   2  16  -3    6.10    6.40 
   2  16  -3   -4.20    5.90 
   0  16   3  -20.50   15.90 
   0  16  -3   -4.30    6.80 
   0  16  -3    4.00    6.10 
   0  16   3    3.10    8.20 
   2  16   3    0.60    7.60 
   2  16   3   20.70    7.60 
  -2  16  -3   -0.20    7.90 
   4 -16   3   -1.40    6.70 
   4  16   3    8.20    6.60 
  -4  16  -3    7.30    8.50 
   4  16   3   -3.70    7.00 
   6 -16   3    0.50    6.80 
  -6  16  -3   -8.00   11.30 
   3  17  -3   -2.30    5.80 
  -1  17   3    3.50    7.00 
   1  17  -3   -8.00    6.10 
  -1  17   3   -9.20    8.80 
   1  17  -3  -10.70    5.70 
  -1  17  -3    6.80    7.30 
   1  17   3    9.20    8.20 
   1  17   3   -2.00    6.70 
  -1  17  -3    3.10    6.10 
 -18   0   4   46.10   11.30 
 -18   0   4   56.49   10.00 
  18   0  -4   35.90   13.50 
 -16   0   4   74.29   11.00 
 -16   0   4   70.99   11.40 
  16   0  -4   57.79   11.70 
 -14   0   4  194.98   19.10 
  14   0  -4  188.38   19.70 
 -14   0   4  161.28   20.00 
 -12   0   4  200.88   19.70 
 -12   0   4  229.78   21.20 
  12   0  -4  202.38   19.90 
  10   0  -4  598.94   40.70 
 -10   0   4  607.94   40.60 
  -8   0   4  896.01   56.39 
   8   0  -4  930.21   56.59 
  -8   0   4  933.61   56.49 
  -8   0   4  773.02   56.19 
  -6   0   4 1469.65   93.29 
  -6   0   4 1504.15   93.29 
   6   0  -4 1564.64   93.29 
  -4   0   4 2667.83  150.98 
   4   0  -4 2600.34  151.88 
  -4   0   4 2518.25  151.78 
   4   0  -4 2199.98  150.78 
  -2   0   4 2490.05  145.69 
   2   0  -4 2431.46  145.89 
  -2   0   4 2301.87  145.79 
   0   0   4 4583.54  273.97 
   0   0   4 4761.02  274.57 
   0   0  -4 4281.57  274.27 
   2   0   4 1982.50  111.29 
   2   0   4 1844.82  112.09 
  -2   0  -4 1679.03  111.29 
   4   0   4 3176.58  194.98 
   4   0   4 3248.58  195.38 
  -4   0  -4 3214.18  194.78 
   6   0   4  856.71   53.19 
   6   0   4  853.31   53.49 
  -6   0  -4  796.42   52.09 
   8   0   4 1481.85   94.69 
  -8   0  -4 1520.55   92.79 
 -10   0  -4  256.57   19.40 
 -10   0  -4  263.97   22.00 
  10   0   4  247.38   24.50 
 -12   0  -4  580.54   38.90 
  12   0   4  500.15   40.00 
 -12   0  -4  485.55   34.60 
  14   0   4   32.00   13.40 
 -14   0  -4   64.29   10.60 
  16   0   4  103.69   16.70 
 -16   0  -4  120.19   13.80 
 -17  -1   4   84.09   12.10 
 -17  -1   4   79.19   11.30 
  17  -1  -4   58.29   12.30 
  17   1  -4   82.69   12.70 
 -17   1   4   82.19   11.50 
 -17   1   4   79.49   11.70 
  15  -1  -4   15.80    9.20 
 -15  -1   4   44.90    9.30 
 -15  -1   4   14.10    8.10 
 -15   1   4    8.90    9.20 
 -15   1   4   17.80    8.30 
  15   1  -4   38.90    9.50 
 -13  -1   4  253.77   25.00 
 -13  -1   4  322.17   24.70 
 -13   1   4  315.47   26.60 
 -13   1   4  327.17   25.00 
 -11  -1   4   51.99    9.00 
  11  -1  -4   54.29    9.10 
 -11  -1   4   21.20   11.30 
 -11   1   4   68.39    9.70 
  11   1  -4   54.69    9.00 
 -11   1   4   47.50   10.80 
   9  -1  -4  948.31   58.49 
  -9  -1   4  894.71   59.09 
  -9   1   4  794.12   58.79 
  -9   1   4  906.51   60.09 
   9   1  -4  988.70   58.39 
   7  -1  -4   90.69   11.70 
  -7  -1   4  100.79   11.00 
  -7  -1   4  100.49   11.90 
   7   1  -4  108.29   11.80 
  -7   1   4  124.69   11.90 
  -7   1   4  103.99   13.00 
  -5  -1   4 2159.88  131.79 
   5  -1  -4 2161.18  131.69 
  -5  -1   4 2111.59  131.89 
   5   1  -4 2107.89  131.79 
  -5   1   4 2301.27  131.29 
  -5   1   4 2100.49  131.69 
   3  -1  -4  103.29    8.30 
  -3  -1   4  107.69    9.20 
   3  -1  -4  112.79    9.30 
  -3  -1   4  118.09    9.40 
  -3   1   4  107.79    9.30 
  -3   1   4  104.79    8.50 
  -3   1   4  130.79    9.20 
   3   1  -4  119.99    9.30 
  -1  -1   4 3061.99  181.48 
   1  -1  -4 2624.04  181.38 
   1   1  -4 3335.17  181.58 
  -1   1   4 3016.40  181.38 
  -1   1   4 2966.00  181.68 
   1  -1   4  187.08   11.30 
   1  -1   4  173.68   12.10 
   1   1   4  141.89   12.20 
  -1   1  -4  153.98   11.10 
   3  -1   4 2055.69  127.99 
   3  -1   4 2187.18  127.39 
   3   1   4 2060.79  127.19 
   3   1   4 2078.19  127.89 
   5  -1   4  180.38   14.60 
  -5   1  -4  179.88   14.00 
   5   1   4  174.38   14.80 
   7  -1   4  807.82   52.39 
   7   1   4  834.32   51.69 
   7   1   4  753.82   53.09 
  -7   1  -4  822.12   50.79 
   9  -1   4   83.89   13.20 
  -9  -1  -4  106.29   11.00 
   9   1   4   76.89   13.20 
  -9   1  -4   98.59   11.00 
   9   1   4  135.29   13.40 
  -9   1  -4  116.49   15.10 
  11  -1   4  221.08   24.40 
 -11  -1  -4  234.78   18.80 
 -11   1  -4  274.77   21.70 
 -11   1  -4  218.88   18.60 
  11   1   4  266.97   26.10 
 -13  -1  -4   50.29    7.70 
  13  -1   4   54.19   13.50 
 -13  -1  -4   54.89   10.00 
 -13   1  -4   15.20   11.50 
  13   1   4   30.10   13.10 
 -13   1  -4   51.19    9.90 
 -15  -1  -4   54.89   10.10 
  15  -1   4   42.00   13.10 
  15   1   4   61.49   14.10 
 -15   1  -4   49.00   10.60 
  17  -1   4   -4.10   11.20 
 -17  -1  -4   21.30    8.30 
  17   1   4   11.60   11.10 
 -17   1  -4   22.80    8.90 
 -18  -2   4   31.50    9.20 
 -18   2   4   38.20   10.00 
  16  -2  -4   12.50    9.10 
  16   2  -4   14.70    8.90 
 -16   2   4   21.10    9.40 
 -16   2   4   14.50    8.40 
 -14  -2   4   58.19   10.20 
  14  -2  -4   73.59   11.60 
  14   2  -4   50.69   10.50 
 -14   2   4   72.39   12.50 
 -14   2   4   67.89   10.80 
 -12  -2   4   70.29   10.60 
  12  -2  -4   52.59   10.30 
 -12   2   4   58.89   12.20 
 -12   2   4   68.59   10.40 
  12   2  -4   66.29   10.20 
  10  -2  -4  139.79   15.70 
 -10  -2   4  113.39   14.70 
 -10   2   4  127.99   14.90 
 -10   2   4  142.79   15.00 
  10   2  -4  123.29   14.40 
   8  -2  -4  193.28   16.50 
  -8  -2   4  204.08   15.90 
   8   2  -4  195.88   16.20 
  -8   2   4  162.18   15.90 
  -8   2   4  126.29   17.70 
   6  -2  -4  186.38   15.10 
  -6  -2   4  170.08   15.00 
  -6  -2   4  197.78   14.70 
  -6   2   4  187.48   15.70 
  -6   2   4  161.78   14.70 
  -4  -2   4  378.46   29.90 
   4  -2  -4  436.96   28.80 
  -4   2   4  485.75   28.80 
  -4   2   4  419.96   28.90 
   4   2  -4  470.35   29.00 
   4   2  -4  473.85   29.20 
  -2   2   4  159.58   12.80 
  -2   2   4  187.28   13.00 
   2   2  -4  183.58   12.40 
   2   2  -4  178.68   12.40 
   0  -2   4  741.63   46.60 
   0  -2   4  726.33   46.30 
   0   2  -4  783.82   46.70 
   0   2   4  766.02   47.00 
   0   2   4  749.92   46.30 
   2  -2   4   91.79    7.50 
   2  -2   4   84.69    8.50 
   2   2   4   76.19    7.30 
   2   2   4   76.79    8.40 
   4  -2   4  697.83   42.30 
   4   2   4  652.93   42.20 
   4   2   4  657.13   42.60 
   6  -2   4   16.90    6.10 
   6   2   4   10.90    4.70 
  -6   2  -4   12.90    6.90 
   6   2   4    7.00    7.20 
   6   2   4   16.40    5.00 
  -6   2  -4   17.00    4.70 
   8  -2   4  376.86   28.30 
   8   2   4  388.66   26.80 
  -8   2  -4  386.96   25.90 
   8   2   4  347.87   30.10 
   8   2   4  390.06   26.80 
  -8   2  -4  371.96   27.80 
  10  -2   4   -1.50    8.30 
 -10  -2  -4   -4.80    4.70 
 -10   2  -4    6.20    5.00 
  10   2   4   -0.80   10.20 
 -10   2  -4   -3.60    6.70 
  10   2   4    4.10    5.50 
 -12  -2  -4  169.58   15.20 
 -12   2  -4  173.48   15.10 
 -12   2  -4  140.79   18.70 
  14  -2   4    7.60   10.90 
 -14  -2  -4   -8.30    7.40 
 -14   2  -4    7.40    8.50 
  14   2   4   15.90   12.00 
 -16  -2  -4   53.19    9.50 
  16  -2   4   48.30   13.20 
  16   2   4   50.09   13.10 
 -16   2  -4   40.10   10.50 
 -17  -3   4   69.89   13.30 
  17  -3  -4   43.00   11.00 
  17   3  -4   55.69   11.10 
 -17   3   4   78.69   11.60 
 -17   3   4   39.00    9.90 
 -15  -3   4   26.60    8.40 
  15  -3  -4   20.10    9.80 
 -15   3   4   17.60    8.40 
 -15   3   4   33.20   11.80 
  15   3  -4   34.80    9.50 
 -13  -3   4  278.47   23.50 
  13  -3  -4  239.08   27.20 
 -13   3   4  280.17   23.70 
 -13   3   4  319.47   26.20 
  13   3  -4  297.37   23.60 
 -11  -3   4   76.19   10.70 
  11  -3  -4   55.89   10.10 
  11   3  -4   70.59   10.10 
 -11   3   4  108.69   13.80 
 -11   3   4   75.29   12.80 
  -9  -3   4  815.62   52.99 
   9  -3  -4  900.71   53.29 
  -9  -3   4  765.82   52.99 
  -9   3   4  734.73   53.59 
   9   3  -4  823.42   52.49 
  -9   3   4  834.82   55.49 
  -7  -3   4  232.78   18.30 
   7  -3  -4  233.18   18.80 
   7   3  -4  235.68   18.20 
  -7   3   4  234.88   18.10 
   7   3  -4  219.28   18.20 
  -5  -3   4 1590.54  101.99 
   5  -3  -4 1478.15  101.39 
   5   3  -4 1720.53  102.19 
   5   3  -4 1769.72  101.79 
  -5   3   4 1576.64  101.59 
  -5   3   4 1790.02  101.69 
  -3  -3   4  448.66   29.10 
   3   3  -4  445.26   28.80 
  -3   3   4  461.25   29.10 
  -3   3   4  447.46   29.40 
   3   3  -4  451.75   29.20 
  -1  -3   4 2282.37  135.49 
  -1   3   4 2291.27  135.69 
  -1   3   4 2120.19  135.39 
   1  -3   4  471.45   30.10 
   1   3   4  526.15   31.20 
  -1   3  -4  468.45   30.60 
   1   3   4  453.45   30.20 
   3  -3   4 1807.42  101.29 
  -3   3  -4 1556.14  101.49 
   3   3   4 1614.14  101.29 
   3   3   4 1638.74  101.59 
   5  -3   4  346.07   23.50 
   5  -3   4  354.96   22.90 
  -5   3  -4  319.67   24.30 
   5   3   4  297.07   23.20 
   5   3   4  327.77   23.60 
  -5   3  -4  412.96   25.70 
   7  -3   4  766.22   48.30 
  -7   3  -4  727.73   48.30 
   7   3   4  627.54   49.00 
   7   3   4  763.92   47.70 
  -7   3  -4  772.52   46.80 
   7   3   4  750.22   47.40 
   9  -3   4  136.89   16.30 
  -9   3  -4  108.59   12.50 
   9   3   4  117.69   15.80 
   9   3   4  133.59   13.80 
   9   3   4  150.18   13.90 
  -9   3  -4  128.19   16.00 
  11  -3   4  193.98   22.00 
 -11  -3  -4  210.18   18.30 
  11   3   4  213.78   24.80 
  11   3   4  263.17   19.20 
 -11   3  -4  201.78   17.80 
 -11   3  -4  241.48   21.20 
 -13  -3  -4   39.70    9.80 
  13  -3   4   43.30   12.20 
 -13   3  -4   36.30    9.70 
  15  -3   4   39.10   13.10 
 -15  -3  -4   67.29   10.50 
  15   3   4   57.39   14.50 
 -15   3  -4   65.79   11.70 
 -17  -3  -4   23.70    8.20 
  17  -3   4    2.60   10.80 
  17   3   4    7.70   10.70 
 -17   3  -4    7.20   10.60 
  18  -4  -4   26.00   11.10 
 -18  -4   4    7.50    7.90 
  18   4  -4   39.60   10.60 
 -18   4   4   17.60   11.60 
 -18   4   4   36.40   10.20 
  16  -4  -4   15.40   10.20 
 -16  -4   4   23.60    9.00 
  16   4  -4   22.90    8.90 
 -16   4   4   25.00    9.40 
 -16   4   4   26.60   10.70 
  14  -4  -4   96.59   13.90 
 -14  -4   4  116.09   15.50 
 -14   4   4  121.19   15.80 
  14   4  -4  125.49   14.00 
 -12  -4   4  146.99   16.90 
  12  -4  -4  143.99   18.20 
 -12   4   4  186.08   20.90 
  12   4  -4  160.78   16.80 
 -12   4   4  142.79   16.80 
  10  -4  -4  347.37   26.60 
 -10   4   4  304.97   25.70 
 -10   4   4  370.26   29.10 
  10   4  -4  359.76   25.70 
  -8  -4   4  504.35   35.30 
   8  -4  -4  496.95   35.50 
  -8   4   4  550.54   35.60 
  -8   4   4  485.15   36.90 
   8   4  -4  544.45   35.30 
   8   4  -4  548.35   35.80 
   6  -4  -4  797.12   47.70 
  -6  -4   4  722.13   47.90 
   6   4  -4  673.33   49.00 
  -6   4   4  787.72   48.60 
   6   4  -4  715.03   47.50 
  -6   4   4  769.92   47.70 
   4  -4  -4 1315.27   84.59 
  -4   4   4 1343.67   85.09 
  -4   4   4 1430.26   85.09 
   4   4  -4 1405.96   85.39 
   4   4  -4 1398.66   84.89 
   2   4  -4  967.00   61.39 
  -2   4   4 1005.50   61.59 
  -2   4   4 1001.70   61.49 
   0  -4   4 2207.38  133.89 
   0   4   4 2218.18  134.39 
   0   4  -4 2194.38  133.89 
   0   4   4 2195.78  134.09 
   2  -4   4  914.91   54.69 
   2   4   4  853.01   54.79 
   2   4   4  881.81   55.39 
  -2   4  -4  877.61   55.29 
   4  -4   4 1957.80  112.49 
   4  -4   4 1963.90  112.09 
   4   4   4 1774.22  113.59 
   4   4   4 1785.02  112.69 
  -4   4  -4 1681.83  113.59 
   6  -4   4  425.26   27.70 
   6  -4   4  387.46   28.30 
   6   4   4  420.56   28.30 
   6   4   4  446.16   28.50 
  -6   4  -4  391.86   28.80 
  -6   4  -4  406.96   29.50 
   8  -4   4  970.40   60.09 
  -8   4  -4  999.50   58.59 
   8   4   4  929.21   58.99 
   8   4   4  770.72   60.89 
  -8   4  -4  914.91   60.19 
   8   4   4  976.60   59.69 
  10  -4   4  154.58   17.80 
 -10   4  -4  142.39   13.50 
  10   4   4  135.49   14.40 
  10   4   4  134.39   17.00 
 -10   4  -4  139.49   17.20 
  10   4   4  166.78   15.60 
 -12  -4  -4  342.37   27.50 
  12  -4   4  302.17   27.70 
 -12   4  -4  308.17   28.00 
 -12   4  -4  364.46   27.40 
  12   4   4  298.47   29.30 
 -14  -4  -4   51.49    9.90 
  14  -4   4   18.20   11.00 
  14   4   4   34.60   12.80 
 -14   4  -4   33.30   10.60 
  16  -4   4   61.49   13.80 
 -16  -4  -4   79.79   11.10 
  16   4   4   83.29   14.10 
 -16   4  -4   51.59   11.70 
  17  -5  -4   30.90   10.50 
 -17  -5   4   37.50    9.30 
 -17   5   4   48.00   11.30 
 -17   5   4   25.90    9.40 
  17   5  -4   40.00   10.00 
 -15  -5   4   -0.80    7.40 
  15  -5  -4   12.60    9.30 
  15   5  -4    9.10    8.00 
 -15   5   4  -12.30    9.60 
 -15   5   4    6.50    7.90 
 -13  -5   4  167.18   17.70 
  13  -5  -4  173.28   19.30 
 -13   5   4  151.88   22.20 
 -13   5   4  155.78   17.50 
  13   5  -4  145.89   17.20 
  11  -5  -4    4.00    7.50 
 -11   5   4   12.90    7.90 
  11   5  -4   18.50    6.80 
 -11   5   4   11.70   10.90 
   9  -5  -4  499.25   34.80 
  -9   5   4  499.05   34.60 
   9   5  -4  480.95   33.90 
  -9   5   4  468.55   36.40 
   9   5  -4  525.75   34.70 
   7  -5  -4    2.40    5.80 
  -7  -5   4   -5.40    4.90 
  -7   5   4   13.10    6.30 
   7   5  -4    3.90    5.10 
  -7   5   4    7.80    8.20 
   7   5  -4    9.30    5.00 
   5  -5  -4  971.70   65.19 
  -5  -5   4 1083.89   65.69 
   5   5  -4 1038.60   65.29 
   5   5  -4 1090.89   66.09 
  -5   5   4 1017.30   65.69 
  -5   5   4 1081.69   65.99 
  -3  -5   4   14.20    3.80 
  -3   5   4   10.70    5.30 
   3   5  -4    7.60    6.80 
   3   5  -4    6.70    3.80 
  -1  -5   4 1162.68   83.69 
  -1  -5   4 1305.27   82.99 
  -1   5   4 1381.66   83.39 
   1   5  -4 1509.15   83.29 
  -1   5   4 1410.06   83.59 
   1  -5   4   18.10    3.50 
   1  -5   4   11.70    4.30 
   1   5   4   10.20    5.50 
  -1   5  -4   14.30    3.40 
  -1   5  -4    9.20    5.00 
   1   5   4   11.00    3.90 
   3  -5   4 1020.70   58.49 
   3   5   4  921.81   58.79 
  -3   5  -4  861.51   60.19 
   5  -5   4   32.30    5.70 
   5  -5   4   24.70    6.00 
   5   5   4   28.70    6.10 
   5   5   4   42.70    6.40 
  -5   5  -4   26.50    7.20 
  -5   5  -4   23.90    7.90 
   7  -5   4  356.16   27.20 
   7  -5   4  384.16   26.30 
  -7   5  -4  390.86   26.40 
   7   5   4  404.16   27.30 
   7   5   4  413.86   27.10 
  -7   5  -4  340.67   28.40 
   9  -5   4   27.90    8.50 
   9   5   4   25.90    7.30 
   9   5   4   29.20   10.00 
   9   5   4   22.20    6.50 
  -9   5  -4   27.50    6.40 
  -9   5  -4   36.90    9.20 
  11  -5   4   94.49   13.40 
 -11   5  -4  129.39   12.70 
  11   5   4  106.09   14.30 
 -11   5  -4   90.49   13.10 
  11   5   4   95.19   15.80 
  11   5   4  110.99   12.00 
 -13  -5  -4   15.50   10.40 
  13  -5   4    9.30    9.90 
  13   5   4   -2.60   19.60 
 -13   5  -4   23.60    9.80 
 -15  -5  -4   29.60    8.70 
  15  -5   4   17.50   10.50 
 -15   5  -4   31.40   10.10 
  15   5   4   19.40   11.70 
  16  -6  -4    4.00    9.00 
 -16  -6   4   -2.30    7.40 
 -16   6   4    6.40   10.20 
 -16   6   4   17.60    7.90 
  16   6  -4   -3.50    7.60 
  14  -6  -4   12.30    9.50 
 -14  -6   4   39.90    9.50 
 -14   6   4   31.90   12.40 
  14   6  -4   41.80    9.10 
 -14   6   4   34.50    9.00 
  12  -6  -4   -0.50   14.00 
 -12   6   4    4.00   13.00 
 -12   6   4   19.20    8.20 
  12   6  -4    8.80    7.20 
  10  -6  -4  121.69   13.90 
 -10   6   4   54.39   12.60 
 -10   6   4   66.19   10.30 
  10   6  -4   62.99    9.60 
  10   6  -4   65.99   10.20 
  -8  -6   4   46.20    7.70 
   8  -6  -4   41.30    7.90 
   8   6  -4   51.89    8.00 
   8   6  -4   46.70    8.50 
  -8   6   4   39.30   10.20 
  -8   6   4   30.30   10.10 
   6  -6  -4   73.69   13.70 
  -6  -6   4   61.59    8.30 
  -6   6   4   92.69   11.90 
   6   6  -4   72.19    8.60 
  -6   6   4   65.99   10.20 
   6   6  -4   63.39    9.00 
  -4   6   4   75.29    9.80 
  -4   6   4   87.49   12.00 
   4   6  -4   95.99   10.30 
   4   6  -4  114.39   10.30 
  -2  -6   4   22.60    4.80 
  -2   6   4   23.80    5.90 
  -2   6   4   23.20    5.70 
   2   6  -4   39.60    5.70 
   0  -6   4  182.58   14.40 
   0  -6   4  166.68   13.20 
   0   6  -4  182.98   14.20 
   0   6   4  176.58   14.80 
   0   6   4  175.78   14.30 
   0   6  -4  188.48   13.40 
   2  -6   4    4.20    4.30 
   2  -6   4   12.50    4.00 
  -2   6  -4   12.90    5.80 
  -2   6  -4   17.30    4.00 
   2   6   4    1.00    7.70 
   2   6   4    2.80    4.80 
   4  -6   4  226.88   16.10 
   4  -6   4  224.78   16.70 
   4   6   4  204.08   17.00 
  -4   6  -4  225.18   18.90 
   4   6   4  207.18   17.10 
  -4   6  -4  202.68   15.80 
   6  -6   4    8.20    4.90 
   6  -6   4    9.90    6.00 
   6   6   4    8.40    5.40 
  -6   6  -4    1.40    7.30 
  -6   6  -4   -2.30    4.80 
   6   6   4   11.20    5.20 
   8  -6   4  201.58   16.70 
   8  -6   4  191.08   15.00 
   8   6   4  122.49   15.00 
   8   6   4  155.58   15.70 
  -8   6  -4  150.78   18.70 
  -8   6  -4  170.28   14.70 
  10  -6   4   10.80    6.10 
  10  -6   4   -7.30   11.70 
 -10   6  -4   -4.30   13.60 
  10   6   4   -2.10    9.00 
  10   6   4    0.00    6.20 
  10   6   4   11.20    5.60 
 -10   6  -4    5.60    6.10 
  12  -6   4   61.39   11.90 
  12   6   4   60.59   13.10 
  12   6   4   67.29   11.00 
  12   6   4   78.59   10.10 
 -12   6  -4   68.89   11.70 
  14  -6   4   -1.10    9.10 
  14   6   4    6.90   10.10 
 -14   6  -4    5.40    9.30 
 -16  -6  -4   25.40    7.80 
  16  -6   4    4.60    9.90 
  16   6   4   14.50   10.50 
 -16   6  -4   17.80   10.10 
  17  -7  -4   12.20   11.50 
 -17  -7   4   30.90    9.00 
 -17   7   4   42.30   11.80 
  17   7  -4   19.00   13.90 
 -17   7   4   19.90   14.20 
  15  -7  -4   11.70    8.80 
 -15  -7   4   -4.00    7.70 
 -15   7   4    2.60   10.60 
  15   7  -4   10.30    7.90 
 -15   7   4   -4.40    8.00 
  13  -7  -4   87.79   12.80 
 -13   7   4  120.69   16.20 
  13   7  -4  106.59   12.90 
 -13   7   4  130.99   15.60 
  11  -7  -4   38.30    8.90 
 -11   7   4   14.80   14.50 
 -11   7   4   24.30    8.80 
  11   7  -4   31.90    7.80 
   9  -7  -4  400.36   26.50 
   9   7  -4  321.17   26.30 
  -9   7   4  377.66   26.80 
  -9   7   4  341.97   29.50 
   9   7  -4  327.57   25.80 
   7  -7  -4   47.60    7.50 
  -7  -7   4   68.49    9.30 
   7   7  -4   48.30    7.80 
  -7   7   4   54.59    9.60 
   7   7  -4   66.29    8.90 
  -7   7   4   50.99   10.20 
  -5  -7   4  654.53   44.50 
   5   7  -4  732.53   45.50 
  -5   7   4  667.93   45.40 
  -5   7   4  694.63   46.20 
   5   7  -4  702.33   44.30 
   3   7  -4   93.69    9.60 
  -3   7   4   67.19    9.00 
   3   7  -4   79.09    8.90 
  -3   7   4   48.70    8.10 
  -1  -7   4  862.11   57.49 
  -1  -7   4  936.21   57.69 
   1   7  -4  967.90   57.99 
  -1   7   4  927.91   58.29 
  -1   7   4  934.61   58.89 
   1  -7   4   98.79   13.10 
   1  -7   4  102.49   10.20 
  -1   7  -4  114.29   12.20 
   1   7   4   98.09   11.20 
   1   7   4  124.99   12.50 
  -1   7  -4  101.49    9.90 
   3  -7   4  743.33   46.20 
   3  -7   4  685.03   45.80 
  -3   7  -4  717.33   45.90 
   3   7   4  729.73   46.70 
   3   7   4  753.72   46.90 
  -3   7  -4  738.63   47.20 
   5  -7   4   86.49   10.00 
   5  -7   4   96.09   11.50 
   5   7   4   96.09   12.10 
   5   7   4   95.49   11.30 
  -5   7  -4   75.99   10.50 
  -5   7  -4   67.39    8.70 
   7  -7   4  339.77   25.80 
   7  -7   4  368.76   24.70 
   7   7   4  346.97   25.20 
  -7   7  -4  356.76   27.60 
   7   7   4  333.87   25.60 
  -7   7  -4  350.26   24.60 
   9  -7   4   93.19   15.40 
   9  -7   4   93.49   11.10 
  -9   7  -4   62.99    8.90 
   9   7   4   65.49   10.10 
   9   7   4   63.99    9.00 
  -9   7  -4   46.20   11.60 
  11  -7   4  104.89   13.50 
 -11   7  -4  107.09   13.50 
  11   7   4  125.49   14.30 
  11   7   4   95.79   14.20 
  13  -7   4   18.50   10.00 
 -13   7  -4    8.90    9.50 
  13   7   4   27.90    7.20 
  13   7   4   39.20    8.80 
  15  -7   4   20.80   12.00 
 -15   7  -4   25.50   12.00 
  15   7   4   30.60   10.40 
  16  -8  -4   13.30    8.60 
 -16  -8   4   -0.80    7.90 
 -16   8   4   18.70    8.30 
  16   8  -4    6.70    7.40 
 -16   8   4   19.20   10.40 
  14  -8  -4   46.80   10.20 
  14   8  -4   57.79   10.00 
 -14   8   4   68.89   13.60 
 -14   8   4   43.30    9.90 
  12  -8  -4   44.50    9.20 
  12   8  -4   31.70    8.40 
  12   8  -4   52.69    9.10 
 -12   8   4   50.19   10.00 
 -12   8   4   38.50   12.70 
  10  -8  -4  130.49   14.90 
 -10   8   4  159.98   16.50 
  10   8  -4  117.59   14.80 
  10   8  -4  123.79   15.00 
  -8  -8   4  141.19   16.70 
   8  -8  -4  184.28   15.40 
  -8   8   4  177.48   17.30 
   8   8  -4  151.78   15.70 
  -8   8   4  204.28   20.60 
   8   8  -4  149.19   15.50 
  -6  -8   4  196.88   16.70 
   6  -8  -4  191.38   15.50 
  -6   8   4  194.58   19.40 
  -6   8   4  195.28   18.40 
   6   8  -4  194.68   16.40 
   6   8  -4  199.18   16.80 
  -4  -8   4  368.66   27.40 
  -4   8   4  404.86   29.00 
   4   8  -4  427.96   27.40 
   4   8  -4  419.26   28.10 
  -4   8   4  406.06   29.40 
  -2   8   4  269.77   21.20 
   2   8  -4  260.67   20.00 
  -2   8   4  295.67   21.50 
   0  -8   4  621.04   41.30 
   0  -8   4  644.14   41.20 
   0   8   4  658.83   42.20 
   0   8  -4  694.93   41.70 
   0   8  -4  601.14   41.60 
   0   8   4  673.53   42.30 
   2  -8   4  199.78   16.10 
   2   8   4  219.28   17.80 
  -2   8  -4  237.48   17.90 
  -2   8  -4  189.78   15.70 
   2   8   4  201.98   16.80 
   4  -8   4  636.14   40.50 
   4  -8   4  609.94   40.80 
  -4   8  -4  613.94   40.40 
   4   8   4  633.04   41.50 
   4   8   4  618.34   41.40 
  -4   8  -4  663.53   41.90 
   6  -8   4  109.29   11.10 
   6  -8   4   76.09    9.90 
   6   8   4  100.19   12.60 
  -6   8  -4   95.09   10.90 
  -6   8  -4   75.89   11.10 
   6   8   4   84.09   11.90 
   8  -8   4  367.06   26.00 
   8  -8   4  356.66   27.70 
  -8   8  -4  380.46   26.20 
   8   8   4  383.36   26.70 
  -8   8  -4  355.66   28.60 
   8   8   4  386.76   27.60 
  10  -8   4   26.70    7.40 
  10  -8   4   43.00    9.70 
  10   8   4   43.60    7.70 
  10   8   4   39.50   14.70 
 -10   8  -4   31.20    9.80 
  12  -8   4  153.38   18.10 
  12   8   4  141.09   15.10 
 -12   8  -4  171.68   19.40 
  12   8   4  131.39   16.70 
  14  -8   4    9.50    9.40 
  14   8   4   26.90   10.00 
  14   8   4   28.30    8.20 
  14   8   4   10.00    6.10 
 -14   8  -4   -1.50    9.10 
  15  -9  -4    1.30    7.90 
 -15  -9   4   -9.40    7.90 
  15   9  -4   -7.90    6.60 
 -15   9   4    4.20    7.90 
 -15   9   4    2.10   10.80 
  13  -9  -4   42.20    9.20 
 -13   9   4   60.89   13.40 
  13   9  -4   39.90    8.80 
  13   9  -4   36.20    8.60 
 -13   9   4   35.70    9.30 
  11  -9  -4    7.90    7.40 
  11   9  -4   -3.10    7.00 
 -11   9   4    4.70    7.60 
  11   9  -4    2.40    6.30 
 -11   9   4   -4.40   10.60 
   9  -9  -4  102.19   12.80 
   9   9  -4  111.59   13.60 
  -9   9   4   83.99   14.00 
  -9   9   4  112.69   14.90 
   9   9  -4  103.79   11.80 
  -7  -9   4   13.80    6.20 
   7  -9  -4    5.90    5.00 
  -7   9   4    0.00    8.60 
   7   9  -4   -2.70    4.40 
   7   9  -4   -0.60    5.40 
  -7   9   4    2.00    7.70 
  -5  -9   4  160.18   15.60 
   5   9  -4  182.38   16.00 
   5   9  -4  201.48   15.70 
  -5   9   4  212.28   18.10 
  -5   9   4  193.38   19.10 
  -3  -9   4   -4.70    4.20 
  -3   9   4    0.50    6.80 
   3   9  -4    3.10    4.40 
  -3   9   4    2.50    6.50 
   3   9  -4    9.40    4.70 
  -1  -9   4  209.18   16.60 
  -1   9   4  232.98   18.60 
   1   9  -4  197.88   16.60 
   1   9  -4  207.98   17.90 
  -1   9   4  246.18   18.70 
   1  -9   4    8.10    4.70 
   1  -9   4   17.90    4.40 
   1   9   4    1.00    5.20 
   1   9   4   -1.40    5.90 
  -1   9  -4    1.50    4.30 
  -1   9  -4   15.70    6.30 
   3  -9   4  144.99   13.80 
   3  -9   4  136.99   13.40 
   3   9   4  130.19   14.20 
  -3   9  -4  153.88   15.60 
  -3   9  -4  141.79   13.00 
   3   9   4  157.98   15.10 
   5  -9   4    9.50    5.80 
   5  -9   4   -3.10    5.50 
   5   9   4    4.80    5.30 
   5   9   4    0.80    5.70 
  -5   9  -4    2.20    7.20 
   7  -9   4   60.49    8.70 
   7  -9   4   58.99   10.10 
   7   9   4   91.29    9.90 
  -7   9  -4   63.69    8.60 
   7   9   4   56.59    9.30 
  -7   9  -4   72.59   10.40 
   9  -9   4   -3.80    7.00 
   9  -9   4    1.90    5.60 
   9   9   4   10.60    6.30 
  -9   9  -4    9.90    8.50 
   9   9   4    2.40    6.30 
  11  -9   4   43.10   10.00 
 -11   9  -4   30.60    9.70 
  11   9   4   22.00    7.70 
  11   9   4   16.60    6.70 
  13  -9   4    9.30    9.00 
 -13   9  -4    5.20    9.10 
  13   9   4   -0.80    5.50 
  13   9   4   -1.30    6.70 
  14 -10  -4   16.40    8.00 
 -14  10   4   -1.80   10.80 
 -14  10   4   20.40    8.50 
  14  10  -4    9.60    7.40 
  14  10  -4    4.80    6.10 
  12 -10  -4    8.70    7.30 
 -12  10   4   17.10    8.20 
  12  10  -4    3.00    6.80 
 -12  10   4    9.90   11.70 
  12  10  -4    0.70    6.30 
  10 -10  -4   10.50    6.80 
 -10  10   4    6.60   10.70 
  10  10  -4   16.70    6.60 
  10  10  -4   19.40    7.10 
 -10  10   4    0.10    7.60 
   8 -10  -4   10.00    5.40 
   8  10  -4    1.20    6.00 
   8  10  -4   -2.00    5.20 
  -8  10   4    9.60    8.30 
  -8  10   4  -11.30    8.80 
  -6 -10   4    5.20    5.80 
   6  10  -4    6.80    5.50 
  -6  10   4   -2.20    8.10 
  -6  10   4    7.30    7.80 
   6  10  -4    4.50    5.70 
  -4 -10   4   17.20    5.20 
  -4  10   4    6.60    7.60 
   4  10  -4   11.30    5.20 
  -4  10   4    7.90    7.40 
   4  10  -4    7.20    5.50 
  -2 -10   4   -2.70    3.70 
   2  10  -4    2.40    4.70 
  -2  10   4   11.20    7.10 
  -2  10   4    3.30    6.90 
   0 -10   4   16.70    5.70 
   0  10   4   20.60    7.00 
   0  10  -4   16.40    5.40 
   0  10   4   14.70    6.50 
   0  10  -4   20.20    6.40 
   2 -10   4   17.10    4.70 
   2 -10   4    5.10    5.30 
  -2  10  -4    5.70    6.90 
   2  10   4    3.70    5.70 
  -2  10  -4   -2.40    4.80 
   2  10   4    1.90    6.40 
   4 -10   4   25.40    6.10 
   4 -10   4   24.90    6.60 
  -4  10  -4   18.20    5.80 
  -4  10  -4   29.40    8.20 
   4  10   4   25.50    7.00 
   4  10   4   22.30    7.20 
   6  10   4    7.80    5.80 
  -6  10  -4    6.90    5.60 
  -6  10  -4    0.10    7.70 
   6  10   4    9.30    6.60 
   8 -10   4   22.70    6.90 
   8 -10   4   26.70    8.00 
  -8  10  -4   24.80    9.20 
   8  10   4   30.70    7.40 
   8  10   4   24.00    7.40 
  10 -10   4   10.40    7.90 
  10  10   4    1.50    6.30 
  10  10   4    6.00    6.80 
 -10  10  -4   -1.00    8.70 
  12 -10   4    9.70    8.70 
 -12  10  -4   14.50    9.50 
  12  10   4    8.10    5.90 
  12  10   4   23.90    8.00 
  14 -10   4   11.30    8.70 
 -14  10  -4    9.60    9.10 
  14  10   4   -3.70    6.80 
  13 -11  -4   44.30    8.90 
  13  11  -4   43.60    8.70 
 -13  11   4   40.90    9.10 
  13  11  -4   32.40    8.20 
 -13  11   4   36.00   12.80 
  11 -11  -4    5.60    6.40 
  11  11  -4    4.40    6.40 
 -11  11   4   14.90    8.10 
 -11  11   4   -0.80   10.50 
  11  11  -4    9.10    6.30 
   9 -11  -4  137.59   13.50 
   9  11  -4  136.99   14.50 
  -9  11   4   96.29   13.30 
   9  11  -4  119.39   14.50 
  -9  11   4   99.99   14.70 
   7 -11  -4    9.70    5.60 
  -7  11   4    4.30    8.00 
  -7  11   4   14.90    9.70 
   7  11  -4   15.10    6.00 
  -5 -11   4  216.08   19.20 
   5  11  -4  228.48   18.20 
  -5  11   4  245.78   24.20 
   5  11  -4  213.88   18.30 
  -5  11   4  231.98   20.70 
  -3 -11   4   32.50    6.10 
  -3  11   4   33.90    8.90 
   3  11  -4   13.80    5.80 
   3  11  -4   26.50   10.20 
  -3  11   4   18.50    8.20 
  -1 -11   4  272.67   21.00 
   1  11  -4  243.28   21.30 
   1  11  -4  296.17   21.20 
  -1  11   4  339.17   23.40 
  -1  11   4  318.07   23.30 
   1 -11   4   34.20    6.90 
   1  11   4   17.80    7.10 
   1  11   4   26.10    7.70 
  -1  11  -4   22.90    6.20 
  -1  11  -4   44.20    8.00 
   3 -11   4  242.98   18.60 
   3 -11   4  222.28   17.40 
   3  11   4  278.47   20.00 
  -3  11  -4  178.18   17.80 
   3  11   4  232.38   19.40 
  -3  11  -4  231.78   20.00 
   5 -11   4   18.50    7.10 
   5 -11   4   16.60    6.20 
  -5  11  -4   24.30    8.60 
  -5  11  -4    9.30    6.00 
   5  11   4   17.60    6.90 
   5  11   4   22.30    7.20 
   7 -11   4  121.39   15.20 
   7  11   4  113.49   14.60 
  -7  11  -4  168.48   17.70 
   9 -11   4   16.60    8.10 
   9  11   4   21.20    7.60 
  -9  11  -4   13.40    9.30 
   9  11   4   21.10    7.10 
  11 -11   4   36.00    9.40 
  11  11   4   37.20    7.50 
 -11  11  -4   41.70   10.60 
  11  11   4   43.30    9.20 
  13 -11   4   -8.80    8.10 
  13  11   4   16.60    7.60 
  13  11   4    8.80    5.70 
 -13  11  -4   22.90    9.70 
  12 -12  -4    6.20    6.90 
 -12  12   4    0.90   10.80 
  12  12  -4    5.80    6.90 
 -12  12   4   20.20    8.20 
  10 -12  -4   18.10    7.00 
  10  12  -4   23.50    7.50 
 -10  12   4   19.40    8.50 
 -10  12   4   16.20   11.30 
  10  12  -4   31.10    7.90 
   8 -12  -4   29.40    6.80 
   8  12  -4   41.60    8.40 
  -8  12   4   23.10    8.50 
   8  12  -4   41.30    8.40 
  -8  12   4   12.60   10.70 
  -6  12   4   37.10    9.60 
  -6  12   4   25.00    9.90 
   6  12  -4   53.09    8.20 
   6  12  -4   41.20    8.40 
  -4  12   4   73.49   11.40 
   4  12  -4   62.99    9.50 
  -4  12   4   86.49   11.60 
   4  12  -4   85.19   10.50 
  -2 -12   4   44.00    7.40 
  -2  12   4   38.60    9.40 
   2  12  -4   49.40    7.20 
  -2  12   4   58.59    9.90 
   2  12  -4   38.90    7.20 
   0 -12   4  148.39   13.70 
   0 -12   4  106.69   13.30 
   0  12   4  148.79   16.00 
   0  12  -4  154.28   14.40 
   0  12  -4  128.49   14.00 
   2  12   4   26.80   10.70 
  -2  12  -4   26.00    7.10 
   2  12   4   36.00    8.20 
  -2  12  -4   33.70    8.60 
   4 -12   4  158.48   14.00 
   4 -12   4  151.18   15.00 
   4  12   4  155.68   15.80 
  -4  12  -4  106.19   16.90 
   6 -12   4   33.80    8.80 
   6 -12   4   15.90    7.10 
   6  12   4   11.50    6.60 
   6  12   4   15.40    7.30 
  -6  12  -4   14.70    8.80 
   8 -12   4   74.29   11.30 
  -8  12  -4   73.59   11.90 
   8  12   4  119.59   14.00 
   8  12   4   97.99   11.20 
  10 -12   4   10.90    8.00 
  10  12   4    3.70    6.50 
 -10  12  -4    6.00    8.90 
  10  12   4   -4.40    5.80 
  12 -12   4   33.40    9.50 
  12  12   4   32.90    6.60 
  12  12   4   32.20    8.30 
 -12  12  -4   41.40   10.40 
  11 -13  -4   -0.60    6.30 
 -11  13   4    4.90   14.20 
  11  13  -4   12.90    6.70 
 -11  13   4   18.50    8.40 
   9 -13  -4   14.80    6.00 
   9  13  -4   28.00    7.50 
  -9  13   4   14.90    8.40 
  -9  13   4   24.80   11.00 
  -7  13   4   -0.10    9.30 
  -7  13   4   -9.60    7.50 
   7  13  -4   -6.70    5.90 
   7  13  -4   -0.30    5.60 
  -5  13   4   30.40    8.70 
   5  13  -4   20.70    6.40 
   5  13  -4   38.00    7.70 
  -5  13   4   28.20   10.00 
  -3  13   4   13.10    7.80 
  -3  13   4    3.60    8.60 
   3  13  -4    8.20    5.70 
   3  13  -4    4.10    6.00 
   1  13  -4   20.20    6.60 
  -1  13   4   15.70    7.80 
  -1  13   4   25.40    8.80 
   1 -13   4   -5.00    5.90 
   1  13   4    2.80    7.20 
   1  13   4   -2.40    6.50 
  -1  13  -4   -0.40    7.10 
   3 -13   4   13.50    6.90 
  -3  13  -4   26.80   10.20 
   3  13   4    6.70    6.80 
   3  13   4   15.20    7.60 
   5 -13   4   -2.80    6.20 
   5  13   4    7.70    7.10 
  -5  13  -4   -6.80    8.20 
   7 -13   4    5.70    7.10 
   7  13   4    8.30    7.10 
  -7  13  -4   -3.40    8.70 
   7  13   4    2.70    6.20 
   9 -13   4   -3.10    7.10 
   9  13   4   -1.80    6.20 
   9  13   4    1.70    6.10 
  -9  13  -4    5.00    9.50 
  11 -13   4    9.20    7.80 
  11  13   4    3.10    6.60 
 -11  13  -4   -0.80    9.10 
  10 -14  -4    8.20    5.90 
  10  14  -4    6.00    6.40 
 -10  14   4   11.90   12.10 
 -10  14   4   -0.70   12.50 
   8  14  -4    4.70    6.50 
  -8  14   4   16.20    8.30 
  -8  14   4   -9.20    9.60 
  -6  14   4    6.90    8.10 
  -6  14   4   12.70   10.20 
   6  14  -4   -1.70    6.00 
   4  14  -4    8.10    6.70 
  -4  14   4   11.30    7.90 
  -4  14   4    1.60    8.90 
   2  14  -4    1.10    5.50 
  -2  14   4    7.40    7.60 
   2  14  -4    5.40    6.40 
  -2  14   4    4.10    8.30 
   0  14  -4    2.90    6.60 
   0  14   4    4.20    8.00 
   0  14   4    5.60    6.90 
   2 -14   4    7.50    6.80 
  -2  14  -4    5.60    7.90 
   2  14   4    6.90    6.60 
   2  14   4   -1.30    7.30 
   4 -14   4    8.70    6.80 
   4  14   4   21.70    7.30 
  -4  14  -4   23.10    8.90 
   4  14   4    9.70    7.50 
   6 -14   4    4.90    6.90 
   6  14   4   -6.00    5.40 
  -6  14  -4    8.50    8.90 
   6  14   4    9.10    7.30 
   8 -14   4    8.90    7.60 
   8  14   4   19.90    7.30 
   8  14   4    5.50    6.50 
  -8  14  -4    6.40    9.70 
   9 -15  -4   12.70    5.90 
  -9  15   4   19.90   11.10 
   9  15  -4   37.20    8.00 
  -9  15   4    7.20    8.30 
  -7  15   4   -1.80    9.90 
   7  15  -4    3.00    6.40 
  -7  15   4  -20.90   11.60 
  -5  15   4   39.80   10.10 
  -5  15   4   36.10   11.00 
   5  15  -4   57.99    9.20 
  -3  15   4   14.40    9.10 
  -3  15   4   24.20    8.50 
   3  15  -4    5.20    6.70 
   1  15  -4   60.59    9.00 
  -1  15   4   44.50   10.40 
  -1  15   4   72.39   11.30 
   1  15  -4   64.99   12.80 
   1  15   4   10.10    8.30 
  -1  15  -4   22.10    7.80 
   1  15   4   16.60    8.40 
   3 -15   4   68.99   10.00 
  -3  15  -4   63.19   10.20 
   3  15   4   57.19    9.80 
   3  15   4   45.00    9.50 
   5 -15   4   14.00    7.40 
   5  15   4    8.00    6.70 
   5  15   4   10.00    7.50 
  -5  15  -4    8.20    8.80 
   7 -15   4   37.30    9.70 
   7  15   4   41.30    8.10 
  -7  15  -4   24.90   10.00 
   7  15   4   37.20    8.60 
   6  16  -4   18.80    7.20 
  -6  16   4   17.50    8.10 
  -6  16   4    7.40    9.70 
  -4  16   4    6.80    8.00 
  -4  16   4   20.80   10.20 
   4  16  -4   14.30    6.90 
   2  16  -4   12.70    6.80 
   2  16  -4    8.30    6.10 
  -2  16   4    9.90    7.60 
  -2  16   4   18.70    9.40 
   0  16  -4   24.50    7.20 
   0  16   4   29.50    9.40 
   0  16   4   29.00    8.80 
   0  16  -4   27.80    7.70 
   2  16   4   13.60    7.50 
   2  16   4   20.40    8.40 
  -2  16  -4   22.00    8.20 
   4 -16   4   29.40    8.70 
   4  16   4   31.70    8.40 
  -4  16  -4   17.00    8.90 
   4  16   4   38.10    8.80 
  18   0  -5   -0.90   15.80 
 -18   0   5  -17.10    7.40 
 -18   0   5    2.20    9.10 
 -16   0   5  -10.70    8.60 
 -16   0   5    5.10    7.60 
  16   0  -5   -2.40    7.70 
  14   0  -5   -3.90    7.40 
 -14   0   5    0.60    8.00 
 -14   0   5   -2.90    8.50 
 -12   0   5   10.70    7.70 
  12   0  -5   -1.50    6.30 
 -12   0   5   19.40    8.90 
  10   0  -5   -1.10    5.80 
 -10   0   5   10.60    7.00 
 -10   0   5   11.00    8.90 
   8   0  -5   -0.60    4.90 
  -8   0   5    3.20    5.80 
  -8   0   5    6.30    5.70 
   6   0  -5   13.80    4.80 
  -6   0   5   16.80    5.30 
  -6   0   5   11.70    4.20 
  -4   0   5    3.30    3.80 
   4   0  -5    1.20    3.40 
   2   0  -5    0.80    2.40 
   2   0  -5    6.10    2.10 
  -2   0   5   10.00    3.20 
   0   0  -5   -0.90    1.90 
   0   0   5    0.20    1.90 
   0   0   5   -1.70    2.70 
   2   0   5    2.50    3.40 
   2   0   5   -1.00    2.30 
   4   0   5   -5.00    3.50 
  -6   0  -5    8.30    3.90 
   6   0   5    5.40    4.90 
   8   0   5   -2.50    7.00 
   8   0   5   -4.40    5.20 
  -8   0  -5    0.50    6.50 
  10   0   5    2.80    8.80 
 -10   0  -5   -1.60    4.50 
 -12   0  -5  -14.60    7.10 
 -12   0  -5    3.20    7.30 
  12   0   5    3.40   10.20 
 -14   0  -5    1.50    7.90 
  14   0   5    1.70   11.10 
 -16   0  -5   -2.70    8.20 
  16   0   5   -0.20   10.70 
 -17  -1   5    5.70    8.30 
  17  -1  -5   -4.20    8.70 
 -17   1   5   12.90   10.00 
  17   1  -5   -8.50    8.00 
 -17   1   5  -15.80   14.20 
  15  -1  -5    4.30    8.10 
 -15  -1   5   -6.00    7.70 
  15   1  -5   -5.30    7.60 
 -15   1   5   18.30    8.70 
 -15   1   5    0.40    9.20 
  13  -1  -5   -2.00    9.40 
 -13  -1   5   11.70    8.00 
 -13   1   5   -6.70    9.30 
  13   1  -5   -2.40    6.90 
 -13   1   5   -0.90    7.70 
  11  -1  -5   25.20    7.90 
 -11  -1   5   38.90    8.30 
  11   1  -5   32.00    7.80 
 -11   1   5    3.10    9.30 
 -11   1   5   22.80    7.80 
  -9  -1   5   30.40    7.70 
   9  -1  -5   38.90    7.70 
  -9  -1   5   30.20    6.30 
  -9   1   5    9.50    8.80 
  -9   1   5   26.20    6.30 
   9   1  -5   24.30    7.00 
  -9   1   5   45.00    8.30 
   7  -1  -5   66.29    8.30 
  -7  -1   5   65.99    9.30 
  -7  -1   5   60.49    8.10 
  -7   1   5   57.89    8.40 
  -7   1   5   70.99   13.30 
   7   1  -5   65.09    8.30 
  -5  -1   5  103.59    9.90 
   5  -1  -5   76.49    9.70 
  -5   1   5   73.09    9.60 
   5   1  -5   94.39    9.70 
  -5   1   5   95.19    9.00 
  -3  -1   5   86.19    8.10 
  -3  -1   5   80.69    8.10 
   3  -1  -5   85.39    8.10 
  -3   1   5  107.39    8.70 
  -3   1   5   83.69    8.40 
   3   1  -5   95.49    8.50 
  -1  -1   5  107.99    8.70 
  -1   1   5  102.29    9.90 
   1   1  -5  112.29    8.30 
   1  -1   5   86.29    7.30 
   1  -1   5   87.69    8.70 
   1   1   5   99.79    9.20 
   3  -1   5   40.20    5.10 
   3  -1   5   39.10    5.80 
   3   1   5   39.30    6.00 
   5  -1   5   42.50    7.00 
   5  -1   5   52.79    7.00 
   5   1   5   48.10    6.70 
   7  -1   5    4.60    6.70 
  -7  -1  -5   16.40    4.70 
   7   1   5   15.20    5.40 
  -7   1  -5   10.40    4.40 
   7   1   5   14.00    7.20 
  -9  -1  -5   15.30    5.10 
   9  -1   5    9.00    8.40 
   9   1   5   15.50    9.60 
  -9   1  -5   20.00    8.30 
   9   1   5   20.70    6.40 
  -9   1  -5    5.30    7.10 
  11  -1   5   -3.60    9.40 
 -11  -1  -5   -2.40    5.20 
 -11   1  -5   -2.40    7.70 
  11   1   5    4.60   10.40 
 -11   1  -5   21.10    8.00 
  13  -1   5   23.20   11.60 
 -13  -1  -5    8.10    8.10 
 -13   1  -5    0.20    7.80 
  13   1   5   -7.50   10.70 
 -15  -1  -5    5.20    7.90 
  15  -1   5   -2.90   10.80 
  15   1   5   -5.80   10.70 
 -15   1  -5   11.50    8.80 
  17  -1   5   -6.50   14.80 
 -17   1  -5  -12.70    9.10 
  17   1   5   -3.10   11.10 
 -18  -2   5   -0.40    8.10 
 -18   2   5  -19.90    7.30 
 -18   2   5   22.80    9.20 
 -16  -2   5    3.20    8.70 
  16  -2  -5  -10.30    7.90 
 -16   2   5   21.70   11.50 
 -16   2   5   -2.60    7.50 
  16   2  -5   -6.40    7.60 
  14  -2  -5   -5.00    7.50 
 -14  -2   5    4.20    7.50 
  14   2  -5    5.70    7.40 
 -14   2   5    1.40    9.60 
 -14   2   5    1.20    7.90 
 -12  -2   5   -8.60    6.70 
  12  -2  -5   -3.40    6.60 
 -12   2   5    9.20   10.40 
 -12   2   5   -1.60    7.40 
  12   2  -5   -2.90    6.20 
 -10  -2   5   14.30    7.30 
  10  -2  -5    5.50    6.50 
 -10  -2   5   10.00    7.20 
  10   2  -5   17.50    6.70 
 -10   2   5   15.50    9.50 
 -10   2   5   13.20    7.30 
  -8  -2   5   16.80    6.70 
  -8  -2   5   17.10    5.50 
   8  -2  -5   15.80    6.20 
  -8   2   5   20.50    6.70 
  -8   2   5    6.90    8.90 
   8   2  -5   15.30    6.00 
  -6  -2   5   25.40    6.10 
   6  -2  -5   22.60    5.60 
  -6  -2   5   25.10    9.60 
  -6   2   5   25.90    6.10 
  -6   2   5   24.20    5.80 
   6   2  -5   23.50    5.60 
  -4  -2   5   22.60    4.50 
  -4  -2   5   29.00    5.20 
   4  -2  -5   22.90    4.60 
  -4   2   5   25.40    5.10 
   4   2  -5   24.80    4.60 
  -4   2   5   35.30    5.20 
  -2   2   5   60.29    6.50 
   2   2  -5   55.79    6.40 
  -2   2   5   56.09    6.70 
   0  -2   5   12.50    3.00 
   0  -2   5   13.10    3.40 
   0   2  -5   10.30    3.10 
   0   2   5   14.20    4.40 
   0   2   5   11.50    3.00 
   2  -2   5   61.79    8.30 
   2  -2   5   60.79    6.80 
   2   2   5   64.09    8.50 
   4  -2   5    2.40    4.00 
   4   2   5    3.90    3.50 
   4   2   5    5.40    4.30 
   6  -2   5   31.30    7.00 
   6   2   5   20.40    5.50 
   6   2   5   23.40    7.10 
  -6   2  -5   24.70    4.70 
   6   2   5   23.60    5.80 
   8  -2   5   13.40    7.50 
  -8   2  -5    0.90    6.40 
   8   2   5    1.00    5.00 
  -8   2  -5    9.30    4.60 
   8   2   5    1.10    8.00 
 -10  -2  -5   11.40    5.20 
  10  -2   5    7.80    9.00 
  10   2   5   10.80    6.20 
 -10   2  -5   -7.30    5.50 
 -10   2  -5   -0.40    7.10 
  10   2   5    7.60   10.00 
  12  -2   5  -13.90    9.50 
 -12  -2  -5    7.20    5.60 
 -12   2  -5    0.90    7.90 
  12   2   5   -6.50   10.60 
  14  -2   5   -5.60   10.80 
 -14  -2  -5   10.00    8.00 
  14   2   5   -9.40   10.60 
 -14   2  -5   -3.40    8.20 
 -16  -2  -5  -12.00    7.10 
  16  -2   5    3.90   11.30 
  16   2   5    6.40   10.90 
 -16   2  -5   -4.30    8.40 
  17  -3  -5    7.50    9.30 
 -17  -3   5    6.40    8.10 
 -17   3   5    1.30   14.20 
 -17   3   5   15.90    9.70 
  17   3  -5    2.20    8.50 
 -15  -3   5   23.70    8.50 
  15  -3  -5   22.50    9.40 
 -15   3   5   23.30    8.90 
  15   3  -5    7.60    8.00 
  13  -3  -5   33.90    9.50 
 -13  -3   5   29.80    9.00 
  13   3  -5   39.30    9.00 
 -13   3   5   34.70    9.60 
 -13   3   5   30.10   12.00 
 -11  -3   5   83.09   11.30 
  11  -3  -5   86.99   11.40 
 -11   3   5  102.29   11.80 
  11   3  -5   83.99   11.10 
   9  -3  -5  136.79   14.40 
  -9  -3   5   91.49   12.80 
  -9  -3   5   97.79   13.60 
  -9   3   5  105.49   13.30 
   9   3  -5  101.19   13.20 
  -9   3   5  105.79   13.50 
  -7  -3   5  154.48   14.60 
   7  -3  -5  167.18   14.90 
  -7   3   5  169.58   17.70 
  -7   3   5  169.18   19.00 
   7   3  -5  163.68   14.80 
  -5  -3   5  214.18   17.00 
   5  -3  -5  205.98   17.00 
  -5   3   5  241.68   17.40 
   5   3  -5  229.98   17.20 
   5   3  -5  229.38   17.10 
  -5   3   5  259.17   17.80 
  -3  -3   5  264.57   17.50 
  -3   3   5  222.88   17.70 
  -3   3   5  249.58   18.00 
   3   3  -5  265.97   17.60 
   3   3  -5  260.57   17.50 
  -1  -3   5  281.77   18.90 
  -1   3   5  301.47   20.00 
  -1   3   5  273.17   18.90 
   1  -3   5  248.18   17.00 
   1   3   5  253.27   17.00 
   1   3   5  254.97   18.50 
   3  -3   5  203.88   14.70 
   3   3   5  201.28   16.20 
   3   3   5  186.78   17.20 
  -3   3  -5  196.98   16.40 
   5  -3   5  146.99   12.80 
   5   3   5  141.69   12.20 
   5   3   5  106.39   12.80 
  -5   3  -5  151.28   14.00 
   7  -3   5  105.79   12.60 
  -7   3  -5   73.49   10.10 
   7   3   5   73.59    9.40 
   7   3   5   90.69   10.90 
   9  -3   5   24.10    8.70 
  -9   3  -5   42.90    8.40 
   9   3   5   35.20    7.30 
   9   3   5   23.00   10.50 
  -9   3  -5   32.70    6.10 
   9   3   5   43.40    7.60 
  11  -3   5   12.50   12.10 
 -11  -3  -5   27.70    6.60 
 -11   3  -5   21.40    6.20 
  11   3   5   14.50   11.90 
  11   3   5   22.20    7.00 
 -11   3  -5   20.20    8.70 
  13  -3   5   10.30   10.50 
 -13   3  -5   16.10    8.70 
  13   3   5   25.70   15.30 
 -15  -3  -5    3.70    7.70 
  15  -3   5    6.30   10.80 
 -15   3  -5   -5.20    8.50 
  15   3   5   15.30   11.60 
  18  -4  -5    0.30    9.20 
 -18  -4   5   13.60    7.80 
  18   4  -5    9.70    8.40 
 -18   4   5    3.40    8.50 
 -18   4   5    2.30    8.10 
 -16  -4   5  -11.10    7.10 
  16  -4  -5   11.70    8.70 
 -16   4   5    4.30    8.50 
  16   4  -5   -7.90    7.60 
 -16   4   5   -1.40    9.80 
 -14  -4   5   18.60    8.60 
  14  -4  -5   -6.00    8.10 
  14   4  -5   17.10    7.90 
 -14   4   5   13.80    8.50 
 -14   4   5   36.60   22.50 
  12  -4  -5   10.30    7.80 
 -12  -4   5    3.00    7.10 
 -12   4   5    7.40    7.80 
 -12   4   5   -0.50    9.90 
  10  -4  -5   15.20    7.10 
 -10  -4   5   27.10    6.90 
 -10  -4   5   33.50    8.30 
  10   4  -5   30.90    7.40 
 -10   4   5   13.10   10.20 
 -10   4   5   42.80    8.50 
  -8  -4   5    6.90    4.90 
   8  -4  -5    2.50    6.10 
  -8   4   5   19.00    8.90 
   8   4  -5    4.00    5.40 
  -8   4   5    1.70    6.40 
   8   4  -5    8.20    4.90 
  -6  -4   5  103.69   12.30 
   6  -4  -5   84.19   11.40 
  -6   4   5   97.09   13.00 
   6   4  -5  116.49   11.60 
   6   4  -5  107.99   11.10 
  -4  -4   5   15.50    4.20 
   4   4  -5    6.10    3.90 
  -4   4   5    8.90    4.80 
   4   4  -5    6.10    3.50 
  -4   4   5    3.20    5.90 
  -2  -4   5  118.39    9.10 
  -2   4   5  110.49   11.20 
   2   4  -5  120.19    9.60 
  -2   4   5   91.79   10.20 
   0  -4   5   13.20    3.50 
   0   4   5    9.00    5.00 
   0   4   5   16.10    4.00 
   0   4  -5   14.70    4.30 
   2  -4   5   92.89    9.30 
   2   4   5   87.89   10.70 
   2   4   5   67.29   10.70 
  -2   4  -5   60.49    7.70 
   4  -4   5   -1.30    4.30 
   4   4   5   10.20    5.00 
  -4   4  -5    9.60    5.90 
   4   4   5   13.00    4.50 
   6  -4   5   40.30    7.20 
  -6   4  -5   21.30    5.40 
  -6   4  -5   22.20    7.20 
   6   4   5   33.30    6.40 
   6   4   5   31.50    6.80 
   8  -4   5   13.40    7.20 
  -8   4  -5    5.70    4.90 
   8   4   5   -9.10    4.70 
   8   4   5    3.30    5.40 
  -8   4  -5    7.70    7.50 
  10  -4   5    1.60    8.40 
  10   4   5   -1.00   10.30 
  10   4   5   16.20    6.50 
 -10   4  -5   13.10    8.10 
  10   4   5    2.90    6.00 
 -10   4  -5   30.80    6.30 
 -12  -4  -5    7.90    8.60 
  12  -4   5   21.20   10.20 
  12   4   5  -14.40    5.50 
 -12   4  -5   -5.10    7.80 
  12   4   5  -12.30   11.40 
  14  -4   5   -2.60   10.10 
  14   4   5  -12.10   10.90 
 -14   4  -5    8.80    8.60 
 -16  -4  -5   -1.80    7.50 
  16  -4   5   14.20   21.20 
  16   4   5   15.50   10.50 
  17  -5  -5   10.40    9.60 
 -17  -5   5    0.40    7.50 
 -17   5   5    3.30    7.90 
  17   5  -5    2.70    8.70 
 -17   5   5   10.20    9.40 
 -15  -5   5    1.10   10.20 
  15  -5  -5  -11.10    8.00 
 -15   5   5    3.50    7.90 
  15   5  -5   -3.10    7.10 
 -15   5   5    3.20   10.40 
  13  -5  -5    8.90    8.30 
 -13  -5   5    1.80    7.80 
 -13   5   5   -1.70    8.10 
  13   5  -5   -1.70    6.90 
 -13   5   5   13.70   14.90 
  11  -5  -5    6.30    7.40 
 -11  -5   5   -5.50    6.80 
 -11   5   5   18.70   10.60 
 -11   5   5    3.20    7.40 
  11   5  -5    8.10    6.60 
  -9  -5   5    1.50    5.80 
   9  -5  -5   27.20    7.80 
   9   5  -5   11.30    6.40 
  -9   5   5    9.00    9.80 
  -9   5   5   20.30    7.30 
   9   5  -5   10.60    5.60 
   7  -5  -5   21.40    6.50 
  -7  -5   5    4.10    5.00 
   7   5  -5   10.50    5.60 
  -7   5   5   19.80    7.00 
  -7   5   5   20.30    8.30 
   7   5  -5    6.40    5.50 
  -5   5   5   19.80    6.80 
   5   5  -5   31.70    5.80 
   5   5  -5   17.40    5.00 
  -5   5   5    5.20   10.20 
  -3  -5   5   22.90    7.80 
  -3   5   5   15.00    5.70 
   3   5  -5   19.20    4.90 
   3   5  -5   16.60    4.10 
  -3   5   5   15.40    5.40 
  -1  -5   5   17.40    4.20 
  -1   5   5   13.70    5.10 
  -1   5   5   21.90    5.30 
   1  -5   5   18.30    4.20 
   1   5   5   16.80    5.00 
   1   5   5   10.90    4.30 
  -1   5  -5   17.10    5.30 
   3  -5   5    4.20    4.40 
  -3   5  -5    3.60    5.50 
   3   5   5    8.40    4.90 
   3   5   5    8.30    4.50 
   5  -5   5    8.30    5.30 
   5   5   5   15.60    5.50 
  -5   5  -5   11.50    6.50 
   5   5   5    4.40    4.70 
   7  -5   5    9.60    6.10 
   7  -5   5   -5.80    4.70 
  -7   5  -5   -3.00    6.50 
  -7   5  -5    2.50    4.70 
   7   5   5   10.10    5.60 
   7   5   5   -3.80    4.70 
   9  -5   5   12.10    7.60 
  -9   5  -5    1.20    7.20 
   9   5   5   -6.70    5.10 
   9   5   5   -0.50    5.40 
  -9   5  -5    9.10    5.60 
  11  -5   5   -2.30    7.80 
  11   5   5   -0.50    6.10 
  11   5   5   11.30   11.00 
 -11   5  -5   10.50    8.60 
  13  -5   5   -1.60    8.80 
 -13   5  -5    2.50    8.90 
 -15  -5  -5    5.00    7.80 
  15  -5   5    5.00   10.20 
 -15   5  -5   -7.20    8.70 
 -16  -6   5   13.00    7.80 
  16  -6  -5    6.50    9.10 
  16   6  -5    5.50    8.20 
 -16   6   5  -13.90    9.10 
 -16   6   5   -6.30    8.50 
  14  -6  -5   19.70    9.60 
 -14   6   5    9.40    8.10 
  14   6  -5   29.20    8.70 
 -14   6   5   35.30   11.90 
  12  -6  -5    7.60    9.70 
 -12  -6   5    8.50    8.00 
  12   6  -5    6.90    6.80 
 -12   6   5   -1.20    7.70 
 -12   6   5   10.50   14.70 
  10  -6  -5   65.19   10.10 
  10   6  -5   52.29    9.40 
 -10   6   5   50.59   12.20 
 -10   6   5   66.59   10.20 
  10   6  -5   77.59    9.70 
   8  -6  -5   33.80    7.60 
  -8  -6   5   24.40    6.60 
   8   6  -5   38.40    7.10 
  -8   6   5   41.00    8.30 
   8   6  -5   37.50    7.40 
  -8   6   5   39.00    9.90 
  -6  -6   5  151.38   13.50 
   6   6  -5  152.58   14.00 
  -6   6   5  144.39   16.10 
  -6   6   5  134.99   15.00 
   6   6  -5  149.88   13.70 
  -4  -6   5   48.00    6.40 
  -4   6   5   44.80    7.60 
   4   6  -5   50.09    7.40 
   4   6  -5   47.00    6.50 
  -4   6   5   56.39    8.30 
  -2  -6   5  223.98   16.30 
  -2   6   5  217.38   17.90 
   2   6  -5  227.68   16.70 
  -2   6   5  241.48   17.80 
   0  -6   5   45.40    6.30 
   0  -6   5   36.50    5.50 
   0   6  -5   44.70    6.20 
   0   6   5   38.20    6.20 
   0   6  -5   38.20    5.50 
   0   6   5   38.80    6.70 
   2  -6   5  175.68   13.90 
   2   6   5  179.28   14.40 
   2   6   5  169.68   15.70 
  -2   6  -5  183.68   24.10 
   4  -6   5   20.80    5.70 
   4   6   5   13.60    6.10 
  -4   6  -5   20.80    7.00 
   4   6   5   18.20    5.50 
   6  -6   5   99.79   11.80 
   6  -6   5   82.29    9.80 
   6   6   5   93.19   12.00 
   6   6   5   84.89   11.40 
  -6   6  -5   75.49   10.70 
  -6   6  -5   76.69    9.50 
   8  -6   5    5.50    6.60 
   8  -6   5   16.20    6.10 
   8   6   5   -2.10    5.60 
   8   6   5    3.10    5.50 
  -8   6  -5   10.00    8.00 
  10  -6   5   31.60    9.00 
  10   6   5   27.40    9.30 
 -10   6  -5   28.80    9.70 
  10   6   5   25.00    7.10 
  12  -6   5   -2.40    8.40 
 -12   6  -5  -17.90    8.20 
  12   6   5   18.40   10.70 
  12   6   5    1.90    6.50 
  12   6   5  -13.00    5.50 
  14  -6   5   -4.00    9.40 
  14   6   5   29.10   11.40 
 -14   6  -5   -5.20    8.70 
 -17  -7   5    9.00    8.20 
  17  -7  -5    4.90    9.10 
 -17   7   5   14.90    8.20 
  17   7  -5   12.10    8.20 
 -17   7   5    4.10    9.90 
  15  -7  -5   14.30    9.10 
 -15  -7   5   23.40    8.70 
 -15   7   5    6.40   10.80 
 -15   7   5   22.80    9.00 
  15   7  -5   14.60    8.10 
  13  -7  -5   23.90    9.10 
  13   7  -5   16.00    8.00 
 -13   7   5   21.40    8.70 
 -13   7   5   31.80   12.10 
  11  -7  -5   51.39    9.70 
  11   7  -5   53.39    9.20 
  11   7  -5   57.89    9.80 
 -11   7   5   55.09   10.20 
   9  -7  -5   60.69    9.50 
  -9  -7   5   97.09   13.20 
  -9   7   5   91.79   10.90 
   9   7  -5   74.59   10.60 
   9   7  -5   75.39   10.10 
  -9   7   5   51.09   12.10 
   7  -7  -5  101.19   11.70 
  -7  -7   5  115.79   12.50 
  -7   7   5  116.99   14.10 
  -7   7   5   80.69   11.90 
   7   7  -5   99.99   12.40 
   7   7  -5   94.49   11.60 
  -5   7   5  139.69   15.90 
   5   7  -5  149.88   13.00 
   5   7  -5  124.39   13.00 
  -5   7   5  140.59   15.20 
  -3  -7   5  110.09   11.40 
  -3   7   5  134.79   13.90 
   3   7  -5  122.29   11.80 
  -3   7   5  145.29   14.00 
   3   7  -5  133.49   11.60 
  -1  -7   5  165.88   14.00 
  -1  -7   5  172.08   13.30 
  -1   7   5  197.78   15.40 
   1   7  -5  188.38   14.10 
  -1   7   5  154.68   15.60 
   1  -7   5  116.49   11.40 
   1  -7   5  133.29   10.60 
  -1   7  -5  119.29   14.70 
   1   7   5  112.19   13.70 
   1   7   5  110.09   12.20 
  -1   7  -5  142.19   11.40 
   3  -7   5  188.98   14.90 
   3  -7   5  178.38   13.50 
  -3   7  -5  163.48   16.40 
  -3   7  -5  155.18   13.00 
   3   7   5  161.08   14.70 
   3   7   5  169.48   16.20 
   5  -7   5   53.89    8.00 
   5  -7   5   59.89    7.30 
   5   7   5   48.10    7.80 
  -5   7  -5   46.30    6.80 
  -5   7  -5   51.59    9.10 
   5   7   5   63.99    8.80 
   7  -7   5   68.99   10.00 
   7  -7   5   82.99   10.10 
  -7   7  -5   70.89    8.60 
   7   7   5   88.59   11.90 
   7   7   5   88.99   10.10 
  -7   7  -5   73.29   10.80 
   9  -7   5   14.80    6.40 
   9  -7   5   22.40    8.40 
  -9   7  -5   12.90    9.00 
  -9   7  -5   -0.90   10.50 
   9   7   5   17.70    6.80 
   9   7   5   23.20    6.90 
  11  -7   5   15.90    8.90 
 -11   7  -5   27.20    9.90 
  11   7   5   27.30    7.30 
  11   7   5   27.30    7.90 
  13  -7   5   -7.40    8.60 
 -13   7  -5   13.20    9.60 
  13   7   5    9.70    6.90 
  13   7   5   -2.50    6.00 
  15  -7   5   -1.10    9.30 
  15   7   5   19.30   11.00 
 -15   7  -5    7.20    9.00 
  16  -8  -5   -6.30    7.70 
 -16  -8   5    5.50    7.80 
 -16   8   5  -18.30    9.60 
 -16   8   5   -6.10    7.60 
  16   8  -5   -1.00   10.40 
 -14  -8   5    4.40    8.20 
  14  -8  -5   -6.90    7.60 
 -14   8   5    2.20    7.90 
  14   8  -5   12.20    7.80 
 -14   8   5   -4.80   11.00 
  12  -8  -5   -5.60    6.70 
 -12   8   5    7.40    8.10 
 -12   8   5    3.00   11.30 
  12   8  -5   -2.70    7.00 
  12   8  -5   -1.70    5.90 
  10  -8  -5   13.90    6.80 
  10   8  -5   12.90    7.10 
 -10   8   5    5.50   11.50 
 -10   8   5   10.60    8.20 
  10   8  -5   13.70    6.50 
  -8  -8   5   -1.10    6.50 
   8  -8  -5   12.60    5.80 
   8   8  -5    1.90    5.20 
  -8   8   5    1.40    8.40 
  -8   8   5   13.90    7.90 
   8   8  -5   -1.10    5.60 
  -6  -8   5   10.50    5.30 
   6   8  -5   23.90    6.10 
  -6   8   5   16.40    8.40 
  -6   8   5   21.50    7.80 
   6   8  -5   18.60    5.70 
   4   8  -5   -3.30    4.20 
   4   8  -5    0.00    4.50 
  -4   8   5    2.70    6.70 
  -4   8   5    7.50    6.90 
  -2  -8   5   42.10    6.10 
  -2   8   5   19.30    7.00 
  -2   8   5   24.90    7.20 
   2   8  -5   25.70    5.70 
   0  -8   5    7.30    4.60 
   0  -8   5    4.30    3.90 
   0   8   5   11.10    5.70 
   0   8  -5    2.10    3.80 
   0   8   5   -0.10    5.80 
   0   8  -5    1.80    5.50 
   2  -8   5   32.10    5.60 
   2  -8   5   32.10    6.10 
  -2   8  -5   37.60    5.80 
  -2   8  -5   29.20    7.10 
   2   8   5   17.30    6.20 
   2   8   5   35.50    7.30 
   4  -8   5    8.30    4.60 
   4  -8   5   -4.20    5.50 
  -4   8  -5    2.00    4.40 
   4   8   5    4.90    5.70 
   4   8   5    3.20    5.30 
  -4   8  -5   -9.60    6.60 
   6  -8   5   15.00    6.70 
   6  -8   5   22.60    6.00 
   6   8   5   22.40    7.10 
   6   8   5   21.70    6.70 
  -6   8  -5   22.60    8.20 
  -6   8  -5    9.00    5.60 
   8  -8   5   -3.60    6.60 
   8  -8   5   -1.80    5.20 
   8   8   5   -6.50    5.60 
  -8   8  -5  -14.60    7.10 
   8   8   5   -7.10    5.60 
  10  -8   5    6.10    7.70 
  10  -8   5  -11.20    6.10 
 -10   8  -5    4.70    9.00 
  10   8   5    6.00    6.60 
  10   8   5   14.10    7.00 
  12  -8   5    5.40    8.80 
 -12   8  -5   -1.40    9.00 
  12   8   5    8.00    6.30 
  12   8   5    2.20    7.10 
  14  -8   5   -3.00   15.90 
  14   8   5    0.90    6.20 
 -14   8  -5  -15.30   15.90 
 -15  -9   5    3.70    8.10 
  15  -9  -5    4.60    7.90 
 -15   9   5   -6.30   10.10 
 -15   9   5   -5.20    9.20 
  15   9  -5   -6.30    6.80 
  13  -9  -5    2.90    7.30 
  13   9  -5    0.90    6.00 
 -13   9   5    7.60    8.40 
 -13   9   5   10.40   11.60 
  13   9  -5   -2.00    6.90 
  11   9  -5    4.70    6.00 
 -11   9   5  -19.10   10.20 
  11   9  -5    0.60    6.40 
 -11   9   5    3.60    7.90 
   9  -9  -5   -3.80    5.60 
  -9   9   5   -1.60    9.40 
   9   9  -5    2.50    5.60 
   9   9  -5   -5.60    6.30 
  -9   9   5   -2.30    7.80 
  -7  -9   5   21.60    6.10 
  -7   9   5   -1.00    7.50 
   7   9  -5   -1.90    4.60 
   7   9  -5    1.50    5.60 
  -7   9   5    2.60    8.50 
  -5  -9   5   -0.10    4.70 
   5   9  -5   -5.90    4.60 
  -5   9   5    1.10    7.30 
   5   9  -5    4.40    5.20 
  -5   9   5    7.90    7.60 
  -3  -9   5    6.10    4.40 
   3   9  -5    4.70    4.60 
  -3   9   5    9.70    6.80 
  -3   9   5   -9.60    6.20 
   3   9  -5    4.70    4.00 
  -1  -9   5    5.70    5.40 
  -1  -9   5    1.20    4.70 
  -1   9   5    7.10    6.40 
  -1   9   5    4.10    6.50 
   1   9  -5    2.20    5.70 
   1   9  -5   -1.50    4.40 
   1  -9   5   -3.80    4.60 
   1  -9   5   10.10    4.00 
   1   9   5    0.40    5.30 
   1   9   5    7.60    6.40 
  -1   9  -5    3.00    5.50 
  -1   9  -5   -2.80    4.20 
   3  -9   5   -0.70    4.80 
   3  -9   5   -9.20    4.00 
   3   9   5   -2.90    5.30 
   3   9   5    6.20    6.40 
  -3   9  -5   -8.40    4.60 
  -3   9  -5   -2.80    6.40 
   5  -9   5    7.50    6.30 
   5  -9   5   -7.10    4.60 
  -5   9  -5  -11.40    6.60 
   5   9   5   -2.40    5.20 
   5   9   5    0.00    6.40 
  -5   9  -5   -0.10    5.00 
   7  -9   5    8.80    5.40 
   7  -9   5    0.30    6.50 
  -7   9  -5    7.10   14.60 
   7   9   5   -3.70    5.90 
   9  -9   5   -7.20    6.80 
   9  -9   5  -10.30    5.40 
   9   9   5   -5.00    6.10 
  -9   9  -5   -2.90    8.40 
   9   9   5    0.50    6.00 
  11  -9   5   11.10    8.30 
  11   9   5    9.90    7.00 
 -11   9  -5   -7.90    8.40 
  11   9   5   13.90    6.50 
  13  -9   5   12.30    9.10 
 -13   9  -5   -5.00    8.80 
  13   9   5   -3.20    5.70 
  13   9   5   -6.40    6.40 
  14 -10  -5    8.00    7.90 
 -14  10   5    5.70   16.40 
  14  10  -5    9.50    7.50 
 -14  10   5    5.70   11.40 
  12 -10  -5   -7.20    6.70 
 -12  10   5    9.40    8.40 
  12  10  -5   -0.60    5.90 
  12  10  -5    3.90    6.70 
 -12  10   5   -0.70   11.10 
  10 -10  -5   16.30    6.90 
  10  10  -5   31.40    8.20 
 -10  10   5   29.40   11.60 
 -10  10   5   36.90    9.30 
  10  10  -5   27.50    7.90 
   8 -10  -5   -0.90    5.10 
  -8  10   5   -6.70    7.60 
   8  10  -5    3.70    5.30 
   8  10  -5    7.30    6.50 
  -8  10   5   -1.20    9.40 
  -6 -10   5   51.89    8.20 
   6  10  -5   51.69    8.40 
   6  10  -5   57.39    8.60 
  -6  10   5   64.79   10.30 
  -4 -10   5   -2.60    4.70 
  -4  10   5    5.40    7.50 
   4  10  -5    4.40    4.50 
   4  10  -5    3.00    5.20 
  -4  10   5    4.20    7.30 
  -2 -10   5   74.39    8.80 
  -2  10   5   65.59   10.00 
  -2  10   5   60.39    9.70 
   2  10  -5   86.99   10.40 
   0 -10   5    6.00    5.20 
   0  10  -5   -8.70    5.70 
   0  10   5    3.20    6.20 
   0  10   5    7.30    6.60 
   0  10  -5   -4.10    4.20 
   2 -10   5   44.60    7.20 
   2 -10   5   74.39    9.10 
  -2  10  -5   48.40    7.20 
   2  10   5   53.69    8.80 
  -2  10  -5   45.70    8.30 
   2  10   5   36.90    8.00 
   4 -10   5   -2.00    4.50 
   4 -10   5    5.70    5.70 
  -4  10  -5    2.80    5.40 
  -4  10  -5    3.00    7.00 
   4  10   5   -3.20    5.30 
   4  10   5    8.80    6.90 
   6 -10   5   30.10    7.80 
   6 -10   5   23.70    6.40 
   6  10   5   19.00    6.70 
  -6  10  -5    8.30   10.30 
   6  10   5   32.60    8.20 
   8 -10   5   -5.00    6.90 
   8 -10   5   -8.10    5.30 
  -8  10  -5   -4.00    8.10 
   8  10   5    2.60    5.90 
   8  10   5   -5.40    6.30 
  10 -10   5   17.70    8.20 
 -10  10  -5   15.10    8.80 
  10  10   5   14.40    7.00 
  10  10   5   14.90    7.30 
  12 -10   5    9.50    8.70 
  12  10   5    4.20    6.30 
 -12  10  -5   -2.80    8.50 
  12  10   5    3.50    5.80 
  13 -11  -5    6.60    6.90 
 -13  11   5   35.90   17.60 
  13  11  -5    6.10    6.60 
 -13  11   5   10.20   11.50 
  11 -11  -5    4.60    6.40 
 -11  11   5   18.70   11.40 
  11  11  -5   11.50    7.10 
 -11  11   5   13.30    8.50 
   9 -11  -5    2.00    5.90 
  -9  11   5   -0.60   10.10 
   9  11  -5    6.30    5.80 
  -9  11   5    4.20    8.20 
   9  11  -5    4.50    6.60 
   7  11  -5   17.00    6.10 
  -7  11   5    4.80    8.30 
   7  11  -5   16.00    7.00 
  -7  11   5   15.60    9.60 
  -5 -11   5   31.10    6.70 
   5  11  -5   23.90    7.30 
  -5  11   5   18.70    8.40 
  -5  11   5   25.40    9.40 
  -3  11   5   12.50    8.00 
   3  11  -5   21.70    5.70 
   3  11  -5   14.60    6.20 
  -1 -11   5   41.50    6.20 
   1  11  -5   10.20    6.00 
   1  11  -5   37.10    6.50 
  -1  11   5   17.30    7.90 
  -1  11   5   25.60    7.90 
   1 -11   5   12.20    6.00 
   1 -11   5   -2.80    9.60 
  -1  11  -5   10.60    5.30 
   1  11   5   11.30    6.60 
  -1  11  -5    1.90    6.70 
   1  11   5   14.60    7.50 
   3 -11   5   38.60    6.60 
   3 -11   5   45.90   12.20 
  -3  11  -5   26.90    8.10 
   3  11   5   36.40    8.50 
   3  11   5   31.80    7.80 
  -3  11  -5   32.90    7.40 
   5 -11   5    3.40    5.10 
   5 -11   5    2.20    6.50 
  -5  11  -5   -4.50   14.70 
   5  11   5    7.30   11.30 
   5  11   5   13.00    6.40 
   7 -11   5   10.80    6.50 
   7 -11   5   12.80    7.80 
   7  11   5   21.40    7.40 
   7  11   5   26.60    8.00 
  -7  11  -5   16.30    8.90 
   9 -11   5   -3.40    7.40 
  -9  11  -5    3.90    8.70 
   9  11   5    2.80    6.60 
   9  11   5    1.20    6.20 
  11 -11   5   12.90    8.40 
  11  11   5   -1.90    5.80 
  11  11   5    0.80    6.40 
 -11  11  -5   -3.40    8.60 
  12 -12  -5    8.20    6.80 
  12  12  -5    2.20    6.50 
 -12  12   5   20.30   11.90 
 -12  12   5    9.60    9.50 
  10 -12  -5   -1.20    5.80 
 -10  12   5    5.50    8.10 
 -10  12   5   -0.70   10.50 
  10  12  -5    8.20    6.60 
   8 -12  -5   10.70    5.50 
   8  12  -5   10.70    5.80 
   8  12  -5    6.70    7.00 
  -8  12   5   28.20   10.50 
  -8  12   5   26.70    8.60 
  -6  12   5    0.40    7.70 
   6  12  -5    7.30    5.20 
   6  12  -5    3.90    6.40 
  -6  12   5   14.50    9.40 
  -4 -12   5   25.90    6.50 
  -4  12   5    6.50    8.90 
   4  12  -5   27.70    6.60 
   4  12  -5   12.80    6.90 
  -4  12   5   20.10    8.50 
   2  12  -5   -1.80    5.70 
   2  12  -5    0.30    4.70 
  -2  12   5    6.50    8.00 
  -2  12   5    3.70    7.20 
   0 -12   5    9.30    6.10 
   0 -12   5   21.90    5.50 
   0  12  -5   21.00    5.70 
   0  12   5   11.50    7.40 
   0  12   5   15.30    8.20 
   0  12  -5   27.00    7.00 
   2 -12   5   -0.80    5.90 
   2 -12   5   -7.90    6.60 
   2  12   5   13.80    7.60 
   2  12   5    1.70    6.10 
  -2  12  -5   -4.70    7.20 
   4 -12   5   11.40    6.50 
   4 -12   5    7.90    5.70 
   4  12   5   19.60    7.00 
   4  12   5    7.10    7.40 
   6 -12   5   -0.20    6.50 
   6 -12   5   -6.60    5.90 
  -6  12  -5    6.50    8.30 
   6  12   5    5.90    6.00 
   6  12   5   -0.80    7.00 
   8 -12   5    3.80    7.60 
   8  12   5   10.70    6.90 
  -8  12  -5   -2.50    8.70 
   8  12   5    0.80    6.10 
  10 -12   5    0.30    7.60 
 -10  12  -5   11.40    9.00 
  10  12   5   -3.00    6.20 
  10  12   5    0.20    6.40 
  11 -13  -5    1.90    5.80 
 -11  13   5  -10.40    7.70 
  11  13  -5    5.40    6.70 
  -9  13   5  -10.10    9.70 
   9  13  -5    2.00    6.70 
  -9  13   5   12.70    8.70 
  -7  13   5    3.10    7.80 
   7  13  -5    3.10    6.40 
  -7  13   5   -5.00    9.60 
  -5  13   5   -4.00    7.50 
   5  13  -5   -3.20    6.10 
  -5  13   5   -9.90    8.70 
  -3  13   5    3.20    8.40 
   3  13  -5   10.30    6.30 
  -3  13   5    1.70    8.00 
   1  13  -5    2.30    5.80 
  -1  13   5    2.70    8.10 
  -1  13   5    8.40    7.90 
   1 -13   5    8.70    6.30 
   1 -13   5    2.00    6.10 
   1  13   5    1.30    8.10 
  -1  13  -5   14.50    7.30 
   1  13   5   10.10    7.20 
   3 -13   5    2.40    6.50 
  -3  13  -5    0.40    7.80 
   3  13   5   -3.80    7.10 
   3  13   5   -6.10   13.60 
   5 -13   5    3.40    6.70 
   5  13   5    7.30    6.70 
  -5  13  -5    6.60    8.60 
   5  13   5   15.30    7.90 
   7  13   5    3.10    6.40 
   7  13   5    7.90    7.30 
  -7  13  -5   -9.00    8.50 
   9 -13   5    4.10    7.70 
  -9  13  -5    0.30    8.90 
   9  13   5    5.80    6.60 
   9  13   5    5.40    6.40 
 -10  14   5    3.00    7.80 
  10  14  -5   12.20    6.60 
 -10  14   5   -4.90   10.50 
  -8  14   5    5.70    8.80 
   8  14  -5   -1.60    6.20 
  -8  14   5   -1.60    9.90 
  -6  14   5    6.40    9.90 
   6  14  -5   -2.80    6.50 
  -6  14   5    6.70    8.80 
  -4  14   5    6.00    9.20 
   4  14  -5    3.60    6.50 
  -4  14   5   -6.20    7.70 
   2  14  -5    9.30    6.60 
  -2  14   5    0.00    7.40 
  -2  14   5    8.20    8.80 
   0  14   5   -6.30   14.60 
   0  14   5   10.40    8.20 
   0  14  -5    2.70    6.40 
   2 -14   5    5.20    6.80 
   2  14   5    8.10    7.10 
  -2  14  -5   10.00    7.50 
   2  14   5   19.50    8.50 
   4 -14   5    6.00    6.80 
   4  14   5    8.70    7.80 
  -4  14  -5   -8.30    8.20 
   4  14   5    1.70    6.20 
   6 -14   5    0.80    6.60 
   6  14   5   -0.60    7.40 
   6  14   5    9.60    6.60 
  -6  14  -5    6.50    9.00 
  -8  14  -5   -0.70    9.30 
   8  14   5    7.10    6.70 
   8  14   5   -7.90    6.50 
   7  15  -5    5.00    6.80 
  -7  15   5   -6.40    7.20 
   5  15  -5    0.50    6.50 
  -5  15   5   12.60    8.50 
  -5  15   5   -6.50    9.10 
  -3  15   5   -7.90    7.50 
  -3  15   5    2.10    9.10 
   3  15  -5   -2.10    6.50 
   1  15  -5    6.50    6.60 
   1  15  -5   -0.50    6.30 
  -1  15   5   -3.60    6.80 
  -1  15   5    1.50    8.80 
   1  15   5   -2.20    6.30 
  -1  15  -5    2.60    7.00 
   1  15   5    0.10    8.00 
   3 -15   5    9.80    7.50 
  -3  15  -5    3.90    8.00 
   3  15   5   -2.80    6.10 
   3  15   5   -0.70    7.80 
   5 -15   5   -5.50    6.80 
   5  15   5   11.90    6.90 
   5  15   5   -8.40    7.60 
  -5  15  -5    4.10    8.50 
   7 -15   5    1.40    7.00 
   7  15   5    0.30    6.30 
   6  16  -5    6.70    6.90 
  -4  16   5   -1.80    8.00 
   4  16  -5    3.80    6.90 
  -2  16   5    3.80    7.40 
  -2  16   5   -8.70    8.60 
   0  16   5   18.40    9.40 
   0  16  -5   21.60    7.10 
   0  16   5    1.60    7.40 
   0  16  -5   15.40    7.00 
  -2  16  -5    4.90    7.10 
   2  16   5   -2.80    6.30 
   2  16   5  -10.60    7.60 
   4  16   5   11.10    8.10 
  -4  16  -5    9.50    8.40 
   4  16   5   13.20    7.00 
 -18   0   6   20.10    9.00 
  18   0  -6   31.80   14.90 
  16   0  -6    1.90    8.00 
 -16   0   6    7.20   10.50 
 -14   0   6   95.89   12.30 
  14   0  -6   63.59   11.10 
 -12   0   6   13.70    8.00 
  12   0  -6   17.40    7.40 
 -10   0   6  180.58   18.60 
 -10   0   6  217.28   17.40 
  10   0  -6  187.48   17.90 
   8   0  -6   83.19    9.60 
  -8   0   6   77.59   10.00 
  -8   0   6   80.19   10.60 
  -6   0   6  326.77   23.60 
   6   0  -6  346.97   23.80 
   4   0  -6  223.18   16.60 
   4   0  -6  223.48   15.40 
  -4   0   6  239.18   16.50 
  -2   0   6  503.25   32.10 
   2   0  -6  505.25   31.80 
   0   0   6  477.65   29.80 
   0   0   6  442.96   28.70 
   2   0   6  393.36   26.70 
   2   0   6  399.76   25.20 
   4   0   6  421.76   28.10 
   4   0   6  444.86   29.30 
   6   0   6  149.69   14.50 
   6   0   6  173.88   15.10 
   8   0   6  223.88   21.20 
   8   0   6  259.77   20.10 
 -10   0  -6   51.89    7.20 
  10   0   6   41.70   10.90 
  12   0   6   89.59   22.50 
 -12   0  -6  135.69   16.70 
  14   0   6    5.60   11.40 
 -14   0  -6   23.50    9.20 
 -16   0  -6   56.59   11.50 
  16   0   6   38.10   13.00 
  17  -1  -6   18.60    9.20 
 -17  -1   6   13.40    8.90 
  17   1  -6   12.50    9.10 
 -17   1   6   18.30    9.00 
 -17   1   6    1.10   10.50 
 -15  -1   6   12.00    8.80 
  15  -1  -6    5.70    8.20 
 -15   1   6   10.40    8.70 
  15   1  -6   -3.80    7.20 
 -15   1   6  -11.70    8.20 
 -13  -1   6   74.39   11.80 
  13  -1  -6   81.19   11.60 
  13   1  -6   97.39   12.00 
 -13   1   6   86.59   12.20 
 -11  -1   6   10.30    7.00 
  11  -1  -6    2.80    6.30 
  11   1  -6   -0.20    6.30 
 -11   1   6   -0.30    7.00 
 -11   1   6   -7.60    8.60 
  -9  -1   6  306.37   22.00 
  -9  -1   6  302.87   22.90 
   9  -1  -6  313.07   22.80 
  -9   1   6  262.47   21.80 
   9   1  -6  285.97   22.50 
  -9   1   6  288.97   23.50 
  -9   1   6  300.37   22.80 
  -7  -1   6    7.90    4.40 
  -7  -1   6    8.90    5.50 
   7  -1  -6    5.20    5.00 
   7   1  -6   -1.00    4.90 
  -7   1   6    0.80    5.20 
  -7   1   6    3.70    5.50 
   5  -1  -6  711.53   47.00 
  -5  -1   6  748.23   47.20 
  -5  -1   6  744.73   47.10 
   5   1  -6  816.92   48.30 
  -5   1   6  730.03   46.70 
  -5   1   6  724.83   47.60 
  -3   1   6    2.80    3.80 
  -3   1   6    5.80    3.80 
   3   1  -6    5.60    3.30 
  -1  -1   6 1257.07   71.49 
  -1   1   6 1063.29   71.59 
   1  -1   6    8.00    3.00 
   1  -1   6   13.00    4.10 
   1   1   6    7.70    4.00 
   3  -1   6  935.51   56.09 
   3   1   6  875.01   57.09 
   5  -1   6   -1.20    4.60 
   5  -1   6    6.50    5.00 
   5   1   6   14.90    4.70 
   5   1   6    9.00    4.80 
   7  -1   6  376.66   27.20 
  -7  -1  -6  382.16   25.30 
   7   1   6  397.36   27.10 
   7   1   6  351.46   27.20 
   9  -1   6   -1.50    7.90 
  -9  -1  -6    5.20    4.50 
   9   1   6    5.80    5.80 
   9   1   6   -1.90    7.90 
 -11  -1  -6  104.19   15.50 
  11  -1   6  111.89   15.20 
 -11   1  -6  145.79   16.80 
  11   1   6  111.49   15.40 
  13  -1   6   -6.20   10.10 
 -13  -1  -6    2.60    7.90 
  13   1   6    6.50   10.80 
 -13   1  -6   12.60    8.40 
 -15  -1  -6   20.40    9.10 
  15  -1   6   25.30   12.20 
  15   1   6   34.40   13.00 
 -15   1  -6   42.80   10.20 
 -18  -2   6   18.90    9.10 
  18  -2  -6   28.60   11.90 
 -18   2   6   20.20    9.50 
  18   2  -6   16.70    9.40 
 -18   2   6   11.60    9.30 
  16  -2  -6    3.70    8.10 
 -16  -2   6  -14.70    7.80 
  16   2  -6   -0.60    7.70 
 -16   2   6    5.50   13.60 
  14  -2  -6   34.90    9.60 
 -14  -2   6   50.79   10.00 
  14   2  -6   47.50    9.70 
 -14   2   6   53.39   10.50 
 -14   2   6   24.10   10.90 
  12  -2  -6    2.90    7.00 
 -12  -2   6   -0.60    6.90 
 -12   2   6    6.70    9.60 
 -12   2   6    0.80    7.40 
  12   2  -6   -5.80    6.30 
 -10  -2   6  103.89   14.10 
  10  -2  -6   89.09   11.20 
 -10  -2   6   84.29   10.70 
 -10   2   6   71.49   12.50 
  10   2  -6  104.99   11.40 
 -10   2   6  105.19   11.80 
  -8  -2   6    4.00    4.70 
   8  -2  -6   -1.10    5.30 
  -8  -2   6    8.90    6.40 
   8   2  -6    1.90    5.40 
  -8   2   6    1.60    6.10 
  -6  -2   6  134.59   13.00 
  -6  -2   6  128.79   11.90 
   6  -2  -6  122.69   12.80 
   6   2  -6  129.79   12.70 
  -6   2   6  140.39   12.70 
  -6   2   6  126.79   12.60 
  -4  -2   6    3.90    3.60 
   4  -2  -6    5.20    3.90 
  -4  -2   6    1.50    4.70 
   4   2  -6    0.50    3.60 
  -4   2   6    3.60    4.60 
  -2   2   6   81.79    9.80 
   2   2  -6   82.79    7.90 
  -2   2   6   82.09    8.50 
   0  -2   6    9.30    3.80 
   0  -2   6    5.20    3.00 
   0   2   6    0.50    3.70 
   2  -2   6   20.20    5.00 
   2  -2   6   20.70    4.30 
   4  -2   6   17.50    5.20 
   4  -2   6   17.60    5.60 
   4   2   6   27.50    5.80 
   6  -2   6    1.00    5.40 
   6   2   6   -2.10    4.50 
   6   2   6   -3.80    4.30 
   8  -2   6   18.10    8.10 
  -8   2  -6   12.10    7.90 
   8   2   6   16.40    5.90 
   8   2   6   -1.90    7.30 
 -10  -2  -6   10.00    7.70 
  10  -2   6   -4.90    8.40 
  10   2   6    3.90    5.90 
 -10   2  -6   -3.20    7.50 
  10   2   6    8.30    8.80 
  12  -2   6   30.10   11.60 
  12   2   6   24.80   11.60 
 -12   2  -6   11.50    8.30 
  14  -2   6    2.70   10.70 
 -14  -2  -6  -14.20    7.50 
 -14   2  -6    6.40    8.80 
  14   2   6   -1.40   10.90 
  16  -2   6    6.40   10.80 
 -16  -2  -6   34.50    9.30 
  16   2   6   16.90   11.30 
  17  -3  -6   28.80    9.80 
 -17  -3   6   36.30    9.30 
  17   3  -6    3.90    8.40 
 -17   3   6   24.60    9.50 
 -17   3   6   18.60    9.90 
 -15  -3   6    8.10   10.60 
  15  -3  -6   18.50    8.70 
 -15   3   6   44.90   21.60 
  15   3  -6   17.80    8.10 
 -15   3   6   19.00    8.60 
 -13  -3   6   95.19   12.00 
  13  -3  -6   77.79   11.60 
 -13   3   6   46.60   12.90 
  13   3  -6   83.79   11.40 
 -13   3   6   89.69   12.00 
 -11  -3   6   18.80    8.40 
  11  -3  -6   10.40    7.30 
 -11  -3   6    1.40    7.30 
 -11   3   6   10.90   10.00 
  11   3  -6   16.70    7.00 
 -11   3   6   14.40    7.80 
  -9  -3   6  313.37   24.90 
   9  -3  -6  345.87   25.20 
  -9  -3   6  359.56   25.70 
  -9   3   6  331.97   25.20 
   9   3  -6  364.06   25.20 
  -9   3   6  302.77   27.20 
   7  -3  -6   17.00    5.70 
  -7  -3   6    3.80    5.80 
  -7   3   6   10.20    6.20 
   7   3  -6    4.30    5.10 
  -7   3   6   21.10    7.10 
   5  -3  -6  792.22   52.19 
  -5  -3   6  852.21   53.09 
  -5   3   6  787.22   52.39 
   5   3  -6  830.42   52.49 
  -5   3   6  897.61   52.79 
  -3   3   6   11.00    8.20 
  -3   3   6    4.90    4.80 
  -1  -3   6 1251.47   70.99 
  -1   3   6 1232.38   71.79 
  -1   3   6 1095.99   72.09 
   1   3  -6 1037.30   71.29 
   1  -3   6    3.00    3.30 
   1   3   6    7.70    4.90 
   1   3   6    3.60    3.20 
   3  -3   6 1067.59   62.29 
   3   3   6  971.00   62.99 
   3   3   6  969.20   62.19 
   5  -3   6    6.20    4.90 
   5   3   6    9.10    5.20 
   5   3   6    1.00    4.00 
  -5   3  -6    5.40    6.80 
   7  -3   6  431.36   31.00 
   7   3   6  446.26   30.90 
  -7   3  -6  467.75   31.90 
   7   3   6  441.06   30.40 
   9  -3   6   11.70    7.90 
   9   3   6   -4.30    8.30 
  -9   3  -6    3.80    7.10 
   9   3   6   -1.50    5.50 
 -11  -3  -6   97.69   15.90 
  11  -3   6  124.49   15.40 
 -11   3  -6  138.39   16.60 
  11   3   6   81.69   15.00 
  13  -3   6   -0.60   10.00 
  13   3   6   10.30   11.40 
 -13   3  -6    1.80    8.40 
 -15  -3  -6   41.50    9.80 
  15  -3   6   44.70   13.00 
 -15   3  -6   36.90   10.20 
  15   3   6   35.20   12.20 
  18  -4  -6   25.40   10.20 
 -18  -4   6   21.40    8.90 
  18   4  -6   39.40   10.00 
 -18   4   6   24.80    8.90 
  16  -4  -6    8.90    8.60 
 -16  -4   6    2.10    7.30 
 -16   4   6   22.40   10.50 
  16   4  -6    5.30    7.90 
 -16   4   6    8.30    9.50 
  14  -4  -6   73.59   12.20 
 -14  -4   6   78.39   14.00 
 -14   4   6   72.99   12.00 
  14   4  -6   86.49   11.80 
 -14   4   6   90.89   18.70 
  12  -4  -6    8.70    7.20 
 -12  -4   6    9.10    7.80 
 -12   4   6   24.40    8.60 
  12   4  -6   17.20    7.70 
 -12   4   6   16.80   11.00 
  10  -4  -6  243.38   20.60 
 -10  -4   6  243.38   20.90 
 -10  -4   6  232.28   19.60 
 -10   4   6  190.58   23.60 
 -10   4   6  274.37   21.20 
  10   4  -6  262.57   20.50 
   8  -4  -6   79.89   10.30 
  -8  -4   6   92.89   11.40 
  -8   4   6   84.09   11.50 
  -8   4   6   98.49   12.90 
   8   4  -6  101.59   12.50 
   6  -4  -6  547.55   35.70 
  -6  -4   6  564.54   36.00 
   6   4  -6  532.65   36.10 
   6   4  -6  524.35   35.80 
  -6   4   6  561.74   36.40 
  -6   4   6  530.75   36.10 
  -4  -4   6  266.87   18.80 
  -4   4   6  275.77   19.90 
   4   4  -6  263.27   18.80 
   4   4  -6  251.67   18.90 
  -4   4   6  264.87   19.60 
  -2   4   6  724.33   45.10 
  -2   4   6  702.63   45.60 
   0  -4   6  458.05   29.60 
   0   4  -6  474.25   29.90 
   0   4   6  434.56   30.80 
   0   4   6  473.35   29.80 
   2  -4   6  602.24   35.20 
   2   4   6  546.75   35.20 
   2   4   6  519.25   36.20 
  -2   4  -6  525.95   35.80 
   4  -4   6  508.25   32.10 
  -4   4  -6  458.45   33.00 
   4   4   6  469.95   32.70 
   4   4   6  503.65   32.10 
   6  -4   6  246.68   19.50 
   6   4   6  248.28   20.00 
   6   4   6  235.98   18.80 
  -6   4  -6  257.77   20.80 
   8  -4   6  262.97   23.20 
   8   4   6  307.07   22.70 
  -8   4  -6  295.97   24.20 
   8   4   6  311.37   22.70 
 -10   4  -6   60.29   10.80 
  10   4   6   69.49   10.10 
  12  -4   6  112.39   14.90 
  12   4   6  121.19   14.70 
  12   4   6   63.19   14.70 
 -12   4  -6  107.09   13.10 
  14  -4   6   -3.80   10.10 
 -14   4  -6   36.20   10.00 
  14   4   6   27.10   11.50 
 -16  -4  -6   66.79   15.60 
  16  -4   6   19.20   11.80 
 -16   4  -6   27.90   10.40 
  16   4   6   45.10   11.70 
 -17  -5   6   19.60    8.60 
  17  -5  -6   19.30    9.70 
  17   5  -6   39.50   17.90 
 -17   5   6   21.50    9.60 
 -17   5   6   15.80    8.50 
  15  -5  -6  -13.40    7.40 
 -15  -5   6   14.80    8.70 
 -15   5   6    7.50   10.40 
  15   5  -6    7.60    7.70 
 -15   5   6   16.90    8.40 
 -13  -5   6   77.79   11.80 
  13  -5  -6   56.19   10.90 
 -13   5   6   65.19   24.00 
 -13   5   6   79.29   11.40 
  13   5  -6   78.39   11.00 
 -11  -5   6   18.40   10.20 
  11  -5  -6   18.30    8.00 
 -11  -5   6   21.40    8.00 
  11   5  -6    7.10    8.80 
 -11   5   6   10.20    7.60 
 -11   5   6    0.70    9.80 
  -9  -5   6  222.58   19.90 
   9  -5  -6  255.47   20.30 
  -9   5   6  262.77   20.50 
  -9   5   6  226.58   23.20 
   9   5  -6  248.48   20.10 
   7  -5  -6    7.20    5.60 
  -7   5   6   14.10    6.90 
   7   5  -6   14.80    5.80 
   7   5  -6   15.40    5.40 
  -7   5   6   23.50    8.20 
  -5  -5   6  529.55   35.10 
   5   5  -6  538.55   35.40 
   5   5  -6  516.75   35.00 
  -5   5   6  579.14   36.00 
  -5   5   6  516.45   35.60 
  -3  -5   6    4.70    3.80 
   3   5  -6    8.50    4.00 
  -3   5   6   15.20    5.80 
  -3   5   6    4.00    5.20 
  -1  -5   6  728.63   45.80 
  -1   5   6  730.13   46.60 
  -1   5   6  724.73   46.00 
   1  -5   6    7.90    4.00 
   1   5   6    1.10    3.90 
   1   5   6   10.10    5.70 
  -1   5  -6    4.20    5.00 
   3  -5   6  647.64   40.30 
   3   5   6  636.14   40.60 
  -3   5  -6  594.34   41.00 
   3   5   6  632.64   41.40 
   5  -5   6    5.30    5.20 
   5   5   6   15.10    5.80 
  -5   5  -6   12.90    6.70 
   5   5   6    5.30    4.90 
   7  -5   6  327.97   25.00 
   7   5   6  332.97   24.50 
  -7   5  -6  329.47   26.00 
   7   5   6  348.87   25.10 
   9  -5   6    6.50    7.80 
   9   5   6    0.00    5.70 
   9   5   6    0.00    5.70 
  -9   5  -6   25.10    9.50 
  11  -5   6  124.89   15.00 
 -11   5  -6  122.19   14.40 
  11   5   6  127.49   14.90 
  11   5   6  136.89   15.20 
  13  -5   6   -1.10    9.40 
  13   5   6    0.50    6.10 
 -13   5  -6    3.00    8.60 
  15  -5   6   43.00   15.10 
  15   5   6   18.20   11.00 
  16  -6  -6    6.10    9.10 
 -16  -6   6    7.10    8.20 
 -16   6   6    5.20   10.10 
  16   6  -6   10.20    7.90 
 -16   6   6   15.70    8.40 
 -14  -6   6   61.39   10.80 
  14  -6  -6   45.50   10.70 
 -14   6   6   45.30   13.20 
 -14   6   6   54.89   10.20 
  14   6  -6   56.99   10.10 
  12  -6  -6   13.70   12.80 
 -12  -6   6    8.20    8.30 
  12   6  -6    4.40    6.90 
 -12   6   6   10.40    8.30 
  10  -6  -6  163.48   15.30 
 -10  -6   6  105.39   14.90 
  10   6  -6  109.19   12.80 
  10   6  -6  132.29   14.40 
 -10   6   6   93.49   14.60 
 -10   6   6  154.08   16.00 
  -8  -6   6    9.00    5.80 
   8  -6  -6   19.10    6.60 
  -8   6   6   19.80    8.80 
   8   6  -6   14.60    6.20 
   8   6  -6   17.80    6.30 
  -8   6   6   28.80    7.80 
  -6  -6   6  108.59   12.70 
   6   6  -6  121.19   12.30 
  -6   6   6  140.39   14.60 
   6   6  -6  134.89   13.00 
  -6   6   6  132.49   15.30 
  -4  -6   6   50.19    7.10 
   4   6  -6   49.90    7.40 
  -4   6   6   52.39    8.20 
  -4   6   6   53.69    8.40 
   4   6  -6   73.49    9.00 
  -2  -6   6   96.89    9.10 
  -2   6   6  105.79   10.40 
   2   6  -6   73.69    9.20 
  -2   6   6   81.79   11.30 
   0  -6   6   80.99    9.10 
   0   6   6   85.29    9.90 
   0   6  -6   93.39   10.70 
   0   6   6   84.19   10.30 
   2  -6   6   47.90    6.60 
   2   6   6   50.69    8.30 
  -2   6  -6   62.19    8.10 
   2   6   6   48.60    7.30 
   4  -6   6   91.19   11.10 
   4   6   6   82.29   11.20 
  -4   6  -6   89.79   10.40 
   4   6   6   86.39   10.40 
   6  -6   6   17.90    6.60 
   6   6   6   23.70    6.50 
  -6   6  -6    9.20    7.20 
   6   6   6   31.90    7.20 
   8  -6   6  119.49   13.60 
   8   6   6   61.19    9.50 
  -8   6  -6   60.19   10.70 
   8   6   6   84.79   10.50 
  10  -6   6   -2.50    7.90 
  10   6   6    1.90    6.40 
  10   6   6    3.40    6.10 
 -10   6  -6   -4.10    8.40 
  12  -6   6   21.90   10.60 
  12   6   6   39.60    8.30 
  12   6   6   35.00    8.80 
 -12   6  -6   38.20   10.90 
  14  -6   6   -3.70    9.40 
  14   6   6   -2.40    9.70 
 -14   6  -6  -17.40    8.30 
 -15  -7   6   14.90    8.50 
  15  -7  -6   15.90    9.40 
  15   7  -6   26.30    8.50 
 -15   7   6   16.40    9.50 
 -15   7   6   34.20   11.70 
  13  -7  -6   85.89   12.50 
 -13  -7   6   99.39   13.60 
  13   7  -6   95.29   11.90 
 -13   7   6  110.69   15.80 
 -13   7   6  113.89   13.00 
  11   7  -6   47.10    8.80 
  11   7  -6   39.30    8.40 
 -11   7   6   55.39    9.90 
 -11   7   6   43.90   13.40 
   9  -7  -6  354.66   25.40 
  -9  -7   6  342.37   25.60 
  -9   7   6  297.27   28.20 
   9   7  -6  321.47   25.50 
   9   7  -6  353.76   25.50 
  -9   7   6  359.06   26.20 
  -7  -7   6   87.19   11.70 
  -7   7   6   83.39   11.00 
   7   7  -6   83.69   11.00 
  -7   7   6   75.29   11.80 
   7   7  -6  102.19   11.80 
  -5  -7   6  689.43   44.70 
   5   7  -6  678.03   44.70 
  -5   7   6  688.23   45.90 
  -5   7   6  734.03   45.80 
   5   7  -6  687.43   45.30 
  -3  -7   6  101.49   10.20 
   3   7  -6   91.79   10.50 
   3   7  -6  107.39   10.50 
  -3   7   6  104.39   12.70 
  -1  -7   6  896.61   58.79 
  -1  -7   6  981.60   58.49 
  -1   7   6  923.01   59.69 
  -1   7   6  932.71   59.49 
   1   7  -6  972.10   59.19 
   1  -7   6  101.39   10.30 
   1  -7   6  107.89    9.40 
   1   7   6  106.49   13.00 
  -1   7  -6   68.19    9.20 
   1   7   6  101.59   11.10 
   3  -7   6  783.52   49.50 
  -3   7  -6  754.22   50.19 
   3   7   6  776.82   49.80 
   3   7   6  789.92   50.19 
   5  -7   6   71.39    9.10 
  -5   7  -6   60.09    9.90 
   5   7   6   75.89    9.90 
   5   7   6   65.79    9.00 
   7  -7   6  411.36   30.10 
   7  -7   6  420.36   28.80 
   7   7   6  433.26   30.20 
  -7   7  -6  413.16   31.60 
   7   7   6  446.96   30.30 
   9  -7   6   28.50    9.00 
  -9   7  -6   38.60   10.00 
   9   7   6   43.90    8.40 
   9   7   6   51.19    9.90 
  11  -7   6  129.59   15.70 
 -11   7  -6  148.69   19.70 
  11   7   6  147.59   17.00 
  11   7   6  175.48   15.90 
  13  -7   6    2.50    9.70 
 -13   7  -6   13.50    9.90 
  13   7   6   12.40    6.70 
  13   7   6   19.50    7.70 
  16  -8  -6   10.30    8.70 
 -16  -8   6   11.30    8.50 
 -16   8   6   23.90   10.80 
  16   8  -6    1.50    8.70 
 -16   8   6    6.60    8.00 
 -14  -8   6   75.39   12.60 
  14  -8  -6   77.39   11.50 
 -14   8   6   60.39   13.60 
  14   8  -6   69.99   10.70 
  12  -8  -6   30.30    8.80 
  12   8  -6   36.80    8.30 
 -12   8   6   37.20    9.40 
  12   8  -6   29.90    8.40 
 -12   8   6   16.00   12.20 
  10  -8  -6  230.78   18.60 
 -10   8   6  175.58   23.30 
  10   8  -6  189.48   18.90 
  10   8  -6  234.38   19.20 
 -10   8   6  219.18   20.10 
  -8  -8   6   97.79   12.40 
   8  -8  -6   87.09   11.10 
   8   8  -6   96.69   15.00 
  -8   8   6   68.39   12.00 
  -8   8   6   68.49   11.00 
   8   8  -6   85.39   10.40 
   6   8  -6  332.47   25.50 
  -6   8   6  379.36   26.90 
  -6   8   6  344.27   27.20 
   6   8  -6  353.76   25.20 
  -4  -8   6  199.78   16.20 
   4   8  -6  195.68   15.20 
   4   8  -6  152.88   15.20 
  -4   8   6  180.08   17.20 
  -4   8   6  170.08   17.50 
  -2  -8   6  503.75   32.40 
  -2   8   6  484.35   34.00 
  -2   8   6  502.05   33.90 
   0  -8   6  288.87   21.80 
   0  -8   6  330.67   21.10 
   0   8   6  311.77   23.50 
   0   8  -6  301.67   21.50 
   0   8   6  306.87   22.60 
   2  -8   6  435.86   26.60 
   2  -8   6  387.46   27.30 
   2   8   6  381.36   27.90 
  -2   8  -6  392.06   28.10 
   2   8   6  404.76   28.70 
   4  -8   6  322.17   24.20 
   4  -8   6  377.36   23.60 
  -4   8  -6  324.97   25.50 
   4   8   6  350.96   25.80 
   4   8   6  316.87   24.70 
   6  -8   6  205.38   18.40 
   6   8   6  225.38   19.60 
   6   8   6  232.78   18.60 
  -6   8  -6  211.98   20.50 
   8  -8   6  256.17   20.60 
   8  -8   6  240.58   18.70 
   8   8   6  231.18   22.80 
   8   8   6  194.78   27.40 
  -8   8  -6  222.28   22.10 
  10  -8   6   46.90   10.70 
 -10   8  -6   64.69   11.60 
  10   8   6   82.59   10.60 
  10   8   6   79.99   11.10 
  12  -8   6   72.79   13.10 
 -12   8  -6  106.89   13.50 
  12   8   6  108.99   13.60 
  12   8   6  123.59   14.10 
  14  -8   6   12.50    9.70 
 -14   8  -6   21.50    9.50 
  14   8   6   23.00    7.10 
 -15  -9   6   13.70    9.10 
  15  -9  -6   18.30    8.20 
 -15   9   6   15.10   10.50 
 -15   9   6   -1.40    8.20 
  15   9  -6   22.20   10.70 
  13  -9  -6   49.70    9.40 
  13   9  -6   47.80    9.40 
 -13   9   6   26.20   12.40 
 -13   9   6   64.89   13.00 
  11  -9  -6   14.60   11.70 
  11   9  -6   20.80    7.10 
 -11   9   6   28.40    9.00 
  11   9  -6   13.90    7.40 
 -11   9   6   13.90   11.40 
   9  -9  -6  166.38   14.60 
  -9   9   6  194.38   17.60 
  -9   9   6  105.19   15.70 
   9   9  -6  146.69   15.50 
   9   9  -6  154.18   15.90 
  -7  -9   6   23.60    6.40 
   7   9  -6   20.90    6.70 
  -7   9   6   24.50    9.80 
  -7   9   6   22.60    8.50 
   7   9  -6   24.20    6.40 
  -5  -9   6  240.98   21.20 
  -5   9   6  312.47   24.20 
   5   9  -6  311.77   22.20 
   5   9  -6  299.57   21.80 
  -5   9   6  326.17   23.70 
  -3  -9   6   14.40    6.50 
  -3   9   6   13.30    7.20 
   3   9  -6   15.10    5.40 
   3   9  -6   13.00    4.80 
  -3   9   6   11.70    7.30 
  -1  -9   6  413.36   26.20 
  -1  -9   6  400.06   26.60 
  -1   9   6  422.86   28.30 
   1   9  -6  364.96   27.00 
  -1   9   6  420.86   28.50 
   1   9  -6  321.77   27.60 
   1  -9   6   11.00    5.30 
   1  -9   6   -2.30    3.90 
  -1   9  -6    7.50    4.50 
   1   9   6    9.50    6.00 
   1   9   6    3.70    6.50 
  -1   9  -6   21.60    6.40 
   3  -9   6  331.37   24.70 
  -3   9  -6  337.07   25.40 
   3   9   6  369.06   26.40 
   3   9   6  355.46   25.30 
   5  -9   6    4.50   11.60 
   5   9   6    5.80    6.80 
   5   9   6    2.10    5.50 
  -5   9  -6   10.40    7.40 
   7  -9   6  200.68   18.20 
   7   9   6  176.68   19.40 
  -7   9  -6  216.18   19.60 
   9  -9   6    1.40    7.40 
   9  -9   6   11.20    6.40 
  -9   9  -6    6.80    8.40 
   9   9   6    3.10    6.20 
   9   9   6    8.80    7.00 
  11  -9   6   76.29   11.70 
  11   9   6   70.19   10.80 
 -11   9  -6   76.89   11.70 
  11   9   6   67.89   10.00 
  13  -9   6    9.30   10.80 
 -13   9  -6   22.50   14.50 
  13   9   6   -0.70    5.90 
  13   9   6    6.40    7.20 
  14 -10  -6   49.99    9.50 
 -14  10   6   44.90   12.70 
  14  10  -6   39.50    9.10 
  12 -10  -6   24.40    7.30 
 -12  10   6    9.60   11.70 
  12  10  -6   13.80    7.50 
 -12  10   6   27.50   11.00 
  10 -10  -6   70.39    9.10 
 -10  10   6   52.99   12.80 
  10  10  -6   83.79   10.70 
  10  10  -6   64.89   10.50 
 -10  10   6   75.19   11.40 
   8  10  -6   42.60    8.40 
  -8  10   6   27.00   10.80 
   8  10  -6   39.10    8.20 
  -8  10   6   40.80    9.80 
  -6 -10   6  107.39   13.70 
   6  10  -6  104.99   12.00 
  -6  10   6   88.39   12.60 
  -6  10   6   97.69   12.40 
  -4 -10   6   73.59    9.30 
   4  10  -6   66.99    8.40 
  -4  10   6   55.39    9.90 
  -4  10   6   54.09   10.30 
   4  10  -6   57.89    8.80 
  -2 -10   6   93.39   10.40 
  -2  10   6  106.99   14.50 
   2  10  -6   86.69   11.40 
  -2  10   6  116.59   14.90 
   0 -10   6  122.09   10.40 
   0 -10   6   93.19   11.70 
   0  10  -6   95.69   12.20 
   0  10  -6   77.79    9.70 
   0  10   6   85.29   11.20 
   0  10   6  115.39   13.40 
   2 -10   6   69.29    8.50 
   2 -10   6   81.79    9.40 
   2  10   6   64.69    9.80 
  -2  10  -6   46.50    9.20 
   2  10   6   57.89    9.20 
  -2  10  -6   63.69    8.80 
   4 -10   6  114.39   11.50 
   4 -10   6   99.49   12.60 
  -4  10  -6  107.79   14.00 
   4  10   6   95.19   11.80 
   4  10   6   84.39   11.30 
   6 -10   6   49.10    8.70 
   6  10   6   24.40    8.40 
  -6  10  -6   21.20    8.40 
   8 -10   6   50.39    8.20 
   8 -10   6   40.10    9.50 
  -8  10  -6   47.10    9.90 
   8  10   6   60.09    9.30 
  10 -10   6   14.80    8.40 
  10  10   6   14.80    7.30 
 -10  10  -6   10.70    8.90 
  10  10   6    7.20    6.80 
 -12  10  -6   11.30   11.10 
  12  10   6   32.10    7.30 
  12  10   6   34.40    8.70 
  13 -11  -6   45.90    8.30 
 -13  11   6   26.10    9.30 
  13  11  -6   37.50    8.70 
 -13  11   6   53.29   13.80 
  11 -11  -6   36.90    7.30 
  11  11  -6   25.70    7.80 
 -11  11   6   23.90   12.10 
   9 -11  -6  144.69   13.10 
  -9  11   6   95.09   15.50 
   9  11  -6  140.99   15.70 
  -9  11   6  159.48   17.20 
  -7  11   6   48.50   10.20 
   7  11  -6   46.10    8.60 
  -7  11   6   37.00   10.70 
   5  11  -6  256.87   21.20 
  -5  11   6  301.87   24.70 
   5  11  -6  251.77   21.10 
  -5  11   6  297.17   23.30 
  -3 -11   6   81.89   10.10 
  -3  11   6   72.49   11.00 
   3  11  -6   78.89   13.20 
   3  11  -6   88.89   11.00 
  -3  11   6   69.59   10.70 
  -1 -11   6  374.56   25.40 
  -1  11   6  410.36   27.80 
  -1  11   6  381.06   28.80 
   1  11  -6  324.47   26.60 
   1 -11   6   83.59   10.00 
   1 -11   6   73.19   10.00 
  -1  11  -6   65.19   13.50 
   1  11   6   60.29    9.60 
  -1  11  -6  119.09   13.00 
   1  11   6   78.19   12.40 
   3 -11   6  331.47   23.80 
   3 -11   6  321.57   23.00 
   3  11   6  311.17   24.60 
  -3  11  -6  322.87   24.40 
   3  11   6  336.87   25.20 
   5 -11   6   68.09    9.80 
   5 -11   6   84.49   10.90 
   5  11   6   65.99   10.50 
   5  11   6   55.49    9.70 
  -5  11  -6   55.39   10.40 
   7 -11   6  149.29   15.90 
   7 -11   6  189.58   17.70 
   7  11   6  219.08   18.50 
  -7  11  -6  212.58   19.40 
   7  11   6  156.08   17.40 
   9 -11   6   29.60    8.90 
  -9  11  -6   23.90    9.40 
   9  11   6   35.40    8.50 
   9  11   6   48.40    8.90 
  11  11   6   60.79   10.80 
  11  11   6   87.99   10.10 
 -11  11  -6   68.89   11.60 
  12 -12  -6   12.90    6.20 
  12  12  -6   22.70    7.50 
 -12  12   6   -8.40    7.60 
  10  12  -6   95.29   11.20 
 -10  12   6   67.69   13.50 
 -10  12   6   60.09   11.30 
  -8  12   6   23.00    8.80 
   8  12  -6   35.00    8.20 
  -8  12   6   16.10   10.80 
   6  12  -6  148.89   14.80 
  -6  12   6  128.99   17.00 
  -6  12   6  105.39   14.80 
  -4  12   6   80.39   11.90 
   4  12  -6   74.99    9.80 
  -4  12   6   62.79   10.90 
   2  12  -6  160.88   15.40 
  -2  12   6  179.88   18.80 
  -2  12   6  157.48   17.80 
   0 -12   6  140.09   14.10 
   0 -12   6  131.79   12.80 
   0  12   6  138.99   16.10 
   0  12   6  137.09   16.70 
   0  12  -6  124.39   14.10 
   2 -12   6  120.39   13.40 
   2 -12   6  156.08   15.10 
   2  12   6  151.78   16.70 
  -2  12  -6  166.68   16.10 
   2  12   6  137.39   15.90 
   4 -12   6  124.59   14.20 
   4 -12   6  112.59   13.10 
   4  12   6  131.89   15.30 
  -4  12  -6  144.59   16.20 
   4  12   6  134.69   16.30 
   6 -12   6   85.19   12.10 
   6 -12   6   84.19   11.00 
   6  12   6   73.39   10.60 
   6  12   6  101.79   12.20 
  -6  12  -6   88.79   11.50 
   8 -12   6   85.09   11.70 
  -8  12  -6   72.89   11.70 
   8  12   6  123.09   14.80 
   8  12   6   78.69   11.20 
  10  12   6   38.90    9.10 
  10  12   6   40.30    8.30 
 -10  12  -6   33.20   10.00 
  11 -13  -6   12.40    6.10 
 -11  13   6   -8.30   11.10 
 -11  13   6   -3.60    7.70 
  11  13  -6    5.50    6.70 
  -9  13   6   23.90    9.30 
  -9  13   6   21.30   11.20 
   9  13  -6   54.89    9.00 
  -7  13   6   23.50   10.80 
   7  13  -6    4.40    6.70 
  -5  13   6   45.70   11.20 
   5  13  -6   77.39    9.90 
  -5  13   6   72.39   12.10 
   3  13  -6    4.60    6.60 
  -3  13   6   16.90    8.70 
  -3  13   6   21.20    9.20 
  -1 -13   6   93.09   13.70 
  -1  13   6   88.69   15.10 
  -1  13   6  101.09   12.20 
   1  13  -6   84.09    9.30 
   1 -13   6    4.00    6.00 
   1 -13   6   -4.00    5.70 
   1  13   6   10.60    8.00 
  -1  13  -6   14.70    7.20 
   1  13   6    7.00    7.10 
   3 -13   6   78.09   10.30 
   3 -13   6   74.29    9.70 
   3  13   6   78.69   11.00 
   3  13   6   91.39   11.60 
  -3  13  -6   76.79   10.70 
   5 -13   6    9.60    6.70 
   5  13   6   -3.40    6.00 
  -5  13  -6   15.30    8.60 
   5  13   6    5.40    8.10 
   7 -13   6   43.40    9.20 
   7  13   6   38.60    8.70 
   7  13   6   46.10    9.30 
  -7  13  -6   42.80    9.90 
   9 -13   6    2.70    8.10 
   9  13   6    5.90    6.90 
   9  13   6    1.60    6.80 
  -9  13  -6   11.20    8.80 
  10  14  -6   38.50   15.90 
 -10  14   6   21.30    8.60 
 -10  14   6    5.90   11.10 
   8  14  -6   10.70    7.10 
  -8  14   6   17.90    9.00 
  -8  14   6   16.20   11.60 
   6  14  -6   33.60    7.90 
  -6  14   6   25.40   11.20 
  -6  14   6   25.20    9.20 
  -4  14   6    3.70    9.10 
  -4  14   6   -4.70    7.90 
   4  14  -6   11.50    7.10 
   2  14  -6   19.10    7.40 
  -2  14   6   21.20    9.10 
  -2  14   6   55.29   10.70 
   0  14   6   37.20    9.70 
   0  14  -6   22.20    6.90 
   0  14   6   12.10    7.80 
   2 -14   6   13.10    7.30 
   2  14   6   17.50    7.70 
   2  14   6   22.80    8.90 
  -2  14  -6   20.50    7.80 
   4 -14   6   37.70    8.60 
   4  14   6   31.10    8.40 
  -4  14  -6   34.50    9.10 
   4  14   6   26.70    9.00 
   6 -14   6   11.70    7.20 
   6  14   6   16.80    8.30 
  -6  14  -6   16.40    9.10 
   6  14   6   17.20    7.30 
   8 -14   6   21.00    8.40 
  -8  14  -6   17.30   12.10 
   8  14   6   33.50    8.00 
   8  14   6   16.70    7.60 
  -7  15   6   23.20   11.20 
   7  15  -6   22.90    7.80 
  -7  15   6   28.30    9.10 
  -5  15   6   47.70   10.50 
   5  15  -6   77.39    9.90 
  -5  15   6   46.20   11.50 
   3  15  -6   19.30    7.50 
  -3  15   6   25.90   10.00 
  -3  15   6   23.00    8.80 
   1  15  -6   74.59   10.00 
  -1  15   6   51.59   10.50 
  -1  15   6  100.39   12.40 
   1  15   6   24.90    9.70 
  -1  15  -6   33.80    7.70 
   1  15   6   27.20    8.30 
   3 -15   6   87.79   10.90 
   3  15   6   94.19   12.20 
   3  15   6   67.09   10.90 
  -3  15  -6   67.99   10.30 
   5  15   6   11.40    8.50 
  -5  15  -6   27.40    9.20 
   5  15   6   26.40    8.20 
  -4  16   6   17.30    8.30 
  -4  16   6   10.30    9.50 
   4  16  -6   16.90    8.30 
  -2  16   6   19.30    8.50 
  -2  16   6   29.00   16.00 
   2  16  -6   33.70    8.10 
   0  16  -6   21.60    7.70 
   0  16   6   12.80    7.70 
   0  16  -6    9.80    6.80 
  -2  16  -6   15.70    7.50 
   2  16   6   13.60    7.60 
  18   0  -7    8.20    8.70 
 -18   0   7    0.50    8.30 
  16   0  -7    4.30    7.60 
 -16   0   7    0.40    8.60 
  14   0  -7   -2.20    7.20 
 -14   0   7    4.90    8.80 
  12   0  -7    6.00    6.60 
 -12   0   7   -8.10    7.30 
  10   0  -7    2.00    5.90 
 -10   0   7   -0.50    6.80 
 -10   0   7    4.60    8.80 
  -8   0   7   -9.30    4.00 
  -8   0   7   -3.00    5.90 
   8   0  -7   -6.50    4.90 
  -6   0   7    4.50    5.20 
  -6   0   7   -1.70    3.90 
   6   0  -7    4.30    4.90 
  -4   0   7   -1.40    3.70 
  -4   0   7    4.30    4.20 
   4   0  -7    7.70    4.10 
   2   0  -7    4.40    3.30 
  -2   0   7    3.70    3.80 
   0   0   7   -2.70    3.70 
   2   0   7    5.00    4.50 
   2   0   7   -1.00    2.70 
   4   0   7   -2.00    3.80 
   4   0   7    5.50    4.80 
   6   0   7   -1.80    5.00 
   6   0   7    7.10    5.50 
   8   0   7   -4.30    5.40 
   8   0   7   -3.40    6.50 
  10   0   7   -5.70    8.40 
  12   0   7    3.30    9.60 
 -12   0  -7   -5.40    8.30 
 -14   0  -7   -0.50    8.40 
  14   0   7    2.00   10.90 
  16   0   7    3.80   10.80 
 -17  -1   7   -4.10    8.40 
  17  -1  -7    5.10    8.30 
  17   1  -7   11.10    8.60 
 -17   1   7   13.20    8.60 
  15  -1  -7   -3.00    7.50 
 -15  -1   7    5.10    8.70 
  15   1  -7    3.60    7.70 
 -15   1   7   -4.50   10.20 
 -13  -1   7   38.10   10.20 
  13  -1  -7   34.70    8.80 
 -13   1   7   21.70    9.90 
  13   1  -7   20.70    8.00 
 -13   1   7   24.30    9.70 
  11  -1  -7   31.20    7.70 
 -11  -1   7   49.90    9.30 
 -11  -1   7   35.30    7.20 
  11   1  -7   31.20    8.00 
 -11   1   7   31.90    7.70 
 -11   1   7   28.40    9.00 
 -11   1   7   41.80    9.50 
  -9  -1   7   68.49   10.50 
   9  -1  -7   91.99   10.70 
  -9  -1   7   79.59    9.60 
   9   1  -7  100.49   10.80 
  -9   1   7   85.69   11.40 
  -9   1   7   91.89   11.00 
  -9   1   7   90.19   11.00 
   7  -1  -7   99.59   12.00 
  -7  -1   7  109.09   12.60 
  -7  -1   7  104.59   11.30 
  -7   1   7  111.29   12.40 
  -7   1   7   99.89   11.90 
   7   1  -7  108.49   12.30 
  -5  -1   7  160.18   13.40 
  -5  -1   7  184.18   14.00 
   5  -1  -7  148.19   13.60 
  -5   1   7  168.68   13.70 
   5   1  -7  153.58   13.70 
  -5   1   7  157.78   13.60 
   3  -1  -7  182.38   14.20 
  -3   1   7  211.38   15.20 
   3   1  -7  187.78   14.30 
  -1  -1   7  206.38   14.70 
  -1   1   7  179.98   15.20 
   1  -1   7  182.88   13.00 
   1  -1   7  188.98   14.90 
   3  -1   7  137.49   11.40 
   3  -1   7  140.29   13.10 
   3   1   7  138.89   13.40 
   5  -1   7   96.89   10.70 
   5  -1   7   96.49   11.80 
   5   1   7   71.59    9.70 
   5   1   7   84.59   11.40 
   7  -1   7   62.69    8.80 
   7  -1   7   44.30    8.30 
   7   1   7   33.90    7.50 
   7   1   7   15.60    7.20 
   9  -1   7   24.70    8.60 
   9   1   7    0.60    8.10 
   9   1   7   27.00    7.10 
  11  -1   7   23.80   14.10 
  11   1   7   15.90    9.90 
 -11   1  -7   12.90    8.30 
 -13  -1  -7   -3.00    8.60 
  13  -1   7    8.10   11.20 
  13   1   7    5.80   10.30 
 -13   1  -7  -11.50    7.70 
  15  -1   7    1.80   10.80 
 -15  -1  -7   11.80    9.20 
  15   1   7   -8.00   10.30 
 -15   1  -7    3.20    8.50 
 -18  -2   7    1.00    8.30 
  18  -2  -7   -4.20    8.00 
 -18   2   7  -15.40    8.00 
 -18   2   7   -4.00    8.30 
  18   2  -7    0.00    8.10 
  16  -2  -7    1.00    7.50 
 -16  -2   7   12.30    9.10 
 -16   2   7   11.80    8.70 
  16   2  -7   -8.20    7.70 
 -16   2   7  -25.10   11.50 
  14  -2  -7   -0.70    7.60 
  14   2  -7    9.10    7.30 
 -14   2   7    2.70    8.30 
 -14   2   7  -17.70    9.00 
  12  -2  -7    1.00    6.50 
 -12  -2   7    4.10    7.40 
 -12   2   7    3.30    9.40 
 -12   2   7    7.90    7.90 
  12   2  -7    4.60    8.00 
 -10  -2   7   -2.00    5.00 
 -10  -2   7    0.20    6.60 
  10  -2  -7    2.60    5.90 
 -10   2   7    7.40    8.20 
  10   2  -7    1.20    6.00 
 -10   2   7    3.30    5.40 
 -10   2   7    7.20    7.20 
  -8  -2   7    3.50    6.40 
   8  -2  -7   10.90    6.00 
   8   2  -7   16.30    6.20 
  -8   2   7    2.40    6.20 
  -8   2   7    3.60    6.50 
  -6  -2   7   10.50    7.00 
  -6  -2   7    3.70    5.50 
  -6   2   7    2.70    5.60 
  -6   2   7   -0.20    5.60 
   6   2  -7   -0.40    4.50 
  -4  -2   7   17.50    4.20 
  -4   2   7   18.10    5.60 
   4   2  -7   32.40    5.40 
  -4   2   7   19.50    5.30 
  -2   2   7    2.40    3.70 
  -2   2   7    0.30    4.50 
   2   2  -7    4.60    3.30 
   0  -2   7   23.70    4.10 
   0  -2   7   24.80    4.70 
   2  -2   7    8.60    8.30 
   2   2   7    1.60    4.50 
   4  -2   7    8.60    4.80 
   4  -2   7   10.90    5.40 
   4   2   7    9.20    5.70 
   6  -2   7   13.00    6.20 
   6   2   7    4.80    5.10 
   8  -2   7   10.70    7.20 
  -8   2  -7   -2.60    7.80 
   8   2   7   -3.20    5.50 
   8   2   7    2.50    7.00 
  10  -2   7    6.50    8.40 
  10   2   7   18.30    9.20 
 -10   2  -7   -2.50    7.40 
  10   2   7   -1.70    5.90 
  12  -2   7   10.40   10.10 
 -12   2  -7   -7.30    7.60 
  12   2   7    1.90   11.00 
 -14  -2  -7    4.70    8.80 
  14  -2   7   13.70   10.70 
  14   2   7  -12.70   10.50 
 -14   2  -7    9.10    8.40 
  17  -3  -7  -12.30    7.70 
 -17  -3   7   27.00    9.10 
 -17   3   7    5.70    8.90 
  17   3  -7   -4.60    7.90 
 -17   3   7    2.60    9.00 
  15  -3  -7    0.90    7.80 
 -15  -3   7   -8.30    7.50 
 -15   3   7  -30.30   17.00 
  15   3  -7   10.70    7.60 
 -15   3   7   15.70    9.00 
  13  -3  -7   12.40    7.70 
 -13  -3   7   -2.80    7.70 
 -13   3   7    2.40    8.20 
  13   3  -7   -3.40    6.80 
 -13   3   7    8.60   10.10 
 -11  -3   7    8.30    6.20 
  11  -3  -7   13.10    7.10 
 -11  -3   7    9.80    7.60 
 -11   3   7    8.40    7.60 
 -11   3   7   -0.90    9.30 
  11   3  -7    7.00    6.50 
  -9  -3   7   15.70    5.80 
  -9  -3   7   -1.10    6.80 
   9  -3  -7   12.80    6.60 
  -9   3   7    7.10    6.80 
   9   3  -7   15.40    6.80 
  -9   3   7   19.50    8.60 
   7  -3  -7   39.40    7.30 
  -7  -3   7   50.59    8.40 
  -7  -3   7   71.59    9.70 
  -7   3   7   50.69    8.20 
  -7   3   7   53.19    8.60 
   7   3  -7   48.70    7.80 
  -5  -3   7   19.30    5.00 
  -5  -3   7   20.50    6.20 
  -5   3   7   25.80    6.50 
  -5   3   7   30.80    6.70 
   5   3  -7   21.90    5.50 
  -3   3   7   81.29    9.60 
  -3   3   7   70.79    9.70 
   3   3  -7   77.09    8.80 
  -1  -3   7   31.80    5.00 
  -1  -3   7   25.40    4.50 
  -1   3   7   30.00    5.00 
  -1   3   7   33.20    6.40 
   1  -3   7   55.79    7.00 
   1  -3   7   64.09    6.50 
   1   3   7   56.89    7.10 
   1   3   7   46.20    7.40 
   3  -3   7   22.90    5.30 
   3   3   7   16.10    6.10 
   5  -3   7   21.10    6.10 
   5   3   7   23.00    5.30 
   5   3   7   24.30    6.80 
   7  -3   7    3.60    6.70 
  -7   3  -7   12.50    7.40 
   7   3   7    7.70    5.40 
   7   3   7    0.70    5.50 
   9  -3   7   13.60    8.10 
  -9   3  -7    0.30    9.50 
   9   3   7   -2.20    5.60 
  11  -3   7   -4.30    9.00 
  11   3   7   -6.90    5.90 
 -11   3  -7   -0.90    8.30 
  11   3   7   -5.60    8.90 
  13  -3   7   -1.10    9.50 
  13   3   7   16.00   10.40 
 -13   3  -7    0.10    8.20 
 -15  -3  -7   -8.10    8.00 
  15  -3   7   -4.50   10.60 
  15   3   7   -3.80    9.80 
  16  -4  -7    7.80    8.60 
 -16  -4   7    3.70    7.90 
 -16   4   7  -12.40    9.00 
 -16   4   7   -2.60    8.20 
  16   4  -7   12.40    7.80 
 -14  -4   7    0.70    8.00 
  14  -4  -7   16.30    8.60 
  14   4  -7    6.40    7.60 
 -14   4   7    8.00    8.90 
  12  -4  -7   30.30    8.40 
 -12  -4   7   26.70    9.10 
  12   4  -7   19.70    7.70 
 -12   4   7   30.40   10.80 
 -12   4   7   11.10    8.70 
 -10  -4   7    2.30    5.40 
 -10  -4   7   25.70    8.00 
  10  -4  -7   20.80    7.20 
 -10   4   7   17.80    9.80 
  10   4  -7   16.40    6.70 
 -10   4   7   21.50    8.20 
  -8  -4   7   71.29    9.60 
   8  -4  -7   58.69    8.40 
  -8   4   7   62.09    9.20 
  -8   4   7   57.89    9.90 
   8   4  -7   49.70    8.40 
  -6  -4   7   36.60   10.30 
  -6   4   7   78.79    9.30 
  -6   4   7   54.69    8.40 
   6   4  -7   40.20    7.30 
  -4  -4   7  123.19   10.70 
  -4   4   7  129.69   13.30 
   4   4  -7  109.19   10.40 
  -4   4   7   97.69   12.20 
   4   4  -7  121.49   11.50 
  -2   4   7   69.99    8.30 
  -2   4   7   49.90    6.80 
   0  -4   7  179.38   13.80 
   0   4   7  170.58   16.20 
   0   4   7  176.68   13.90 
   0   4  -7  209.48   15.20 
   2  -4   7   21.90    5.00 
   2   4   7   25.60    6.50 
  -2   4  -7   27.40    6.90 
   2   4   7   37.20    5.50 
   4  -4   7  121.89   12.30 
   4   4   7  141.19   14.00 
  -4   4  -7  120.69   14.30 
   4   4   7  122.69   11.70 
   6  -4   7   12.20    6.20 
   6   4   7    5.00    6.20 
   6   4   7    6.90    5.10 
  -6   4  -7   11.20    7.00 
   8  -4   7   63.79    9.80 
   8   4   7   47.90    8.20 
  -8   4  -7   46.60    9.60 
   8   4   7   52.19    9.00 
  10  -4   7   -1.10    8.10 
 -10   4  -7    1.60    8.00 
  10   4   7    3.00    6.40 
  12  -4   7   20.90   10.50 
  12   4   7   -1.30    9.40 
 -12   4  -7   24.70    9.20 
  12   4   7   12.80    7.30 
  14  -4   7    2.70   10.40 
  14   4   7    3.50   10.10 
 -14   4  -7   -5.70    8.30 
  17  -5  -7   14.50   11.10 
 -17  -5   7    6.30    8.10 
 -17   5   7    4.80    8.20 
  17   5  -7    6.10    8.30 
 -17   5   7  -10.80    8.30 
 -15  -5   7    4.20    8.60 
  15  -5  -7   19.40    9.10 
  15   5  -7   20.70    8.10 
 -15   5   7   -0.50    9.90 
 -15   5   7   14.70    8.40 
  13  -5  -7   40.70    9.60 
 -13  -5   7   26.90    9.50 
 -13   5   7   36.10    9.80 
  13   5  -7   38.70    8.90 
 -11  -5   7   36.50    9.40 
  11  -5  -7   18.70    7.70 
 -11  -5   7   33.00    9.30 
  11   5  -7   49.90    8.70 
 -11   5   7   26.00   10.80 
 -11   5   7   38.40    9.20 
   9  -5  -7  105.39   13.10 
  -9  -5   7   79.69   10.30 
  -9  -5   7   98.49   12.20 
   9   5  -7   91.09   11.00 
  -9   5   7  108.79   14.50 
  -9   5   7  102.69   13.30 
   7  -5  -7   88.39   11.80 
  -7  -5   7  124.59   12.20 
  -7   5   7  115.89   13.70 
  -7   5   7  121.59   15.30 
   7   5  -7  100.79   12.40 
   7   5  -7   85.59   11.10 
  -5  -5   7  155.58   13.50 
   5   5  -7  184.38   14.20 
   5   5  -7  144.49   13.40 
  -5   5   7  166.18   15.90 
  -5   5   7  143.39   15.30 
  -3  -5   7  154.28   12.40 
  -3   5   7  154.18   14.10 
  -3   5   7  164.88   15.10 
   3   5  -7  154.58   12.90 
   3   5  -7  160.08   12.50 
  -1  -5   7  221.68   16.00 
  -1   5   7  221.38   16.40 
  -1   5   7  206.18   18.10 
   1  -5   7  153.68   12.40 
  -1   5  -7  143.39   15.30 
   1   5   7  147.69   12.60 
   1   5   7  163.58   15.30 
   3  -5   7  177.58   14.20 
   3   5   7  193.38   16.90 
  -3   5  -7  158.78   16.10 
   3   5   7  172.78   14.60 
   5  -5   7   85.89    9.90 
   5   5   7  111.79   13.30 
   5   5   7   89.89   11.10 
  -5   5  -7   83.69   10.60 
   7  -5   7   61.39    9.90 
  -7   5  -7   66.09   10.20 
   7   5   7   72.19    9.30 
   7   5   7   85.59   10.80 
   9  -5   7   18.30    8.80 
  -9   5  -7   33.70    9.30 
   9   5   7   39.90    8.60 
   9   5   7   25.30    7.30 
  11  -5   7   21.40   10.10 
  11   5   7   33.30    8.20 
 -11   5  -7   10.90    9.10 
  13  -5   7    2.80   10.40 
  13   5   7  -15.00    9.10 
 -13   5  -7    2.10    8.80 
  13   5   7    8.10    6.80 
  15  -5   7    5.80   11.20 
 -15   5  -7  -10.80    8.80 
  15   5   7    8.60   10.10 
  16  -6  -7    4.30    9.20 
 -16  -6   7   -6.90    8.00 
  16   6  -7    5.10    7.70 
 -16   6   7    1.50    9.50 
 -16   6   7    2.10    8.10 
  14  -6  -7    1.50    8.30 
 -14  -6   7    6.80    8.70 
 -14   6   7   13.20   11.00 
  14   6  -7    3.10    7.00 
 -14   6   7    3.30   10.30 
 -12  -6   7   12.90    8.50 
 -12   6   7    3.80   12.00 
 -12   6   7    1.70    8.30 
  12   6  -7    1.30    6.60 
 -10  -6   7    2.30    6.30 
  10  -6  -7    2.70    6.30 
 -10   6   7    6.20    7.80 
  10   6  -7    3.40    9.30 
 -10   6   7    5.00    9.90 
  -8   6   7   31.50    7.90 
   8   6  -7    6.10    6.00 
   8   6  -7   14.30    5.90 
  -8   6   7   17.80    8.80 
  -6  -6   7    4.50    8.40 
   6   6  -7    6.10    5.00 
  -6   6   7   -7.30    6.50 
  -6   6   7   -2.00    6.80 
   6   6  -7    1.10    4.40 
  -4  -6   7   40.20    5.90 
   4   6  -7   18.50    5.30 
   4   6  -7   31.80    5.80 
  -4   6   7   34.30    7.30 
  -4   6   7   35.00    7.70 
  -2   6   7    5.10    5.60 
  -2   6   7   -3.50    5.50 
   0  -6   7   35.60    5.70 
   0   6  -7   31.80    6.30 
   0   6   7   35.30    6.30 
   0   6   7   41.00    7.60 
   2  -6   7    5.80    4.80 
   2   6   7    5.60    6.40 
   2   6   7    9.30    4.80 
  -2   6  -7    8.70    5.70 
   4  -6   7   36.20    6.90 
   4   6   7   45.80    8.40 
  -4   6  -7   31.60    7.50 
   4   6   7   23.30    6.20 
   6  -6   7    2.70    6.10 
   6   6   7    0.80    6.30 
   6   6   7    0.50    5.10 
  -6   6  -7   18.70    7.30 
   8  -6   7   18.30    9.10 
  10  -6   7    2.90    8.10 
  10   6   7   -0.90    6.20 
  10   6   7   -4.10    6.20 
 -10   6  -7   -5.80    8.00 
  12  -6   7   10.50    9.40 
 -12   6  -7   -4.60    8.80 
  12   6   7   -0.30    6.60 
  12   6   7    2.70    8.80 
  14  -6   7   -5.50   11.80 
  14   6   7   -9.60    9.40 
  15  -7  -7   14.20    8.70 
 -15  -7   7   -0.50    8.40 
 -15   7   7    7.80    8.40 
 -15   7   7   -7.20    9.90 
  15   7  -7   14.30    8.10 
  13  -7  -7   12.40    8.30 
 -13  -7   7  -10.80    7.90 
  13   7  -7    5.10    7.20 
 -13   7   7  -13.10   13.00 
 -13   7   7    8.50   11.20 
  11  -7  -7   13.80    7.60 
 -11   7   7   14.00    8.40 
  11   7  -7   15.10    7.10 
 -11   7   7   14.10   10.80 
   9  -7  -7    6.50    6.30 
  -9  -7   7    3.20    5.90 
   9   7  -7   -2.30    4.50 
  -9   7   7   16.00    9.90 
  -9   7   7   13.20    7.90 
  -7  -7   7   30.40    6.20 
   7   7  -7   31.00    6.90 
  -7   7   7   36.70    8.70 
  -7   7   7    7.40    8.40 
   7   7  -7   27.50    7.00 
  -5  -7   7   12.30    4.90 
  -5   7   7   -2.70    6.80 
  -5   7   7    5.90    6.90 
   5   7  -7   -3.20    4.80 
   5   7  -7    4.90    4.80 
  -3  -7   7   46.80    6.10 
  -3   7   7   30.20    7.60 
  -3   7   7   29.90    7.80 
   3   7  -7   38.80    6.40 
   3   7  -7   28.30    5.80 
  -1  -7   7   -3.50    4.10 
  -1   7   7    6.10    6.20 
  -1   7   7    4.00    5.70 
   1  -7   7   20.70    5.40 
   1   7   7   18.60    5.50 
   1   7   7   27.40    7.60 
  -1   7  -7   13.00    6.00 
   3  -7   7    0.40    5.00 
   3   7   7    0.80    5.10 
   3   7   7    5.10    6.20 
  -3   7  -7    4.40    6.40 
   5  -7   7    4.90    6.00 
   5   7   7    3.40    6.70 
   5   7   7    6.30    5.50 
  -5   7  -7    6.80    7.10 
   7  -7   7   -4.60    6.90 
   7   7   7   -2.40    6.40 
   7   7   7   -1.00    7.90 
  -7   7  -7   -9.20    7.30 
   9  -7   7   -3.30    7.20 
   9   7   7    5.20    6.90 
  -9   7  -7    4.80    8.60 
   9   7   7   13.30    6.70 
  11  -7   7   -7.60    8.00 
 -11   7  -7    3.60    8.90 
  11   7   7    1.40    6.80 
  11   7   7   -6.90    6.20 
  13  -7   7    1.70    9.70 
  13   7   7   -5.20    6.10 
 -13   7  -7   -1.30    9.20 
  16  -8  -7    9.60    8.40 
 -16  -8   7    6.60    8.40 
  16   8  -7   -4.50    7.30 
 -16   8   7  -13.00    7.50 
 -14  -8   7   -6.50    8.00 
  14  -8  -7    0.60    7.70 
  14   8  -7    3.50    7.20 
 -14   8   7   -0.40   10.50 
 -14   8   7   -1.20    8.20 
  12  -8  -7   -3.00    7.20 
 -12   8   7   14.70    9.10 
 -12   8   7    9.00   11.20 
  12   8  -7   16.10    7.90 
  10  -8  -7    7.70    6.60 
  10   8  -7   10.50    7.00 
 -10   8   7   -8.40    7.70 
 -10   8   7    6.70   10.30 
  10   8  -7    4.20    5.60 
   8   8  -7   34.30   12.10 
  -8   8   7   44.10   10.60 
  -8   8   7   43.30    9.30 
   8   8  -7   38.10    7.80 
  -6  -8   7    2.90    5.50 
   6   8  -7   10.00    5.30 
  -6   8   7   16.10    7.80 
   6   8  -7    6.90    5.50 
  -6   8   7   16.40    8.30 
  -4  -8   7   75.39   10.00 
  -4   8   7  107.89   14.10 
   4   8  -7   86.89   10.90 
  -4   8   7  108.59   13.60 
  -2  -8   7   13.20    4.40 
   2   8  -7    6.90    5.50 
  -2   8   7   17.80    6.80 
  -2   8   7   10.90    7.00 
   0  -8   7  121.29   11.90 
   0   8  -7   87.49   11.90 
   0   8   7  110.59   12.60 
   0   8   7  135.89   14.60 
   2  -8   7   14.40    5.60 
  -2   8  -7    4.40    6.10 
   2   8   7   16.60    7.20 
   2   8   7   10.40    5.60 
   4  -8   7  101.99   12.10 
   4   8   7   90.29   12.20 
   4   8   7   91.39   11.30 
  -4   8  -7   78.09   10.70 
   6  -8   7    3.70    6.40 
  -6   8  -7    4.30    7.60 
   6   8   7   -1.80    5.20 
   6   8   7   -3.10   11.60 
   8  -8   7   29.50    8.90 
  -8   8  -7   33.90    9.50 
   8   8   7   51.69    8.90 
   8   8   7   62.39    9.70 
  10  -8   7    4.20    7.80 
  10   8   7   -0.20    6.40 
  10   8   7   -5.90    6.30 
 -10   8  -7    3.40    8.90 
  12  -8   7    3.40    9.00 
 -12   8  -7   11.40    9.40 
  12   8   7   10.10    6.90 
  12   8   7    4.20    7.10 
  15  -9  -7    7.30    7.60 
 -15  -9   7   15.90    9.00 
 -15   9   7    0.20   11.00 
 -15   9   7    3.80    8.00 
  15   9  -7    5.80    7.50 
  13  -9  -7   17.30    7.70 
 -13   9   7   27.10   12.20 
 -13   9   7   20.80    9.20 
  13   9  -7   13.80    7.80 
  11  -9  -7    5.00    7.10 
  11   9  -7    4.20    6.80 
 -11   9   7    6.90    8.70 
 -11   9   7   31.70   11.70 
   9  -9  -7   28.20    6.90 
  -9   9   7   36.10    9.30 
   9   9  -7   35.20   12.00 
  -9   9   7   38.90   11.20 
   9   9  -7   36.70    8.20 
  -7  -9   7   21.10    8.70 
   7   9  -7   39.50    7.20 
  -7   9   7   24.90    8.90 
   7   9  -7   42.00    7.60 
  -7   9   7   21.40   10.20 
  -5  -9   7   64.79    8.80 
  -5   9   7   58.99   10.50 
   5   9  -7   73.19    8.80 
   5   9  -7   63.49    9.20 
  -5   9   7   56.59   10.00 
  -3  -9   7   51.89    7.10 
   3   9  -7   44.70    7.60 
  -3   9   7   54.99    9.20 
  -3   9   7   46.00    9.10 
   3   9  -7   57.19    7.40 
  -1  -9   7   80.99    9.20 
  -1  -9   7   86.49    9.40 
  -1   9   7  122.19   14.20 
  -1   9   7   66.09   10.20 
   1  -9   7   63.99    8.20 
   1   9   7   53.19    8.60 
  -1   9  -7   71.39    8.20 
   1   9   7   53.69    9.30 
   3  -9   7   65.09    8.70 
   3   9   7   54.89    8.80 
  -3   9  -7   63.39    8.90 
   3   9   7   66.19    9.50 
   5  -9   7   44.10    8.10 
   5   9   7   23.70    7.30 
  -5   9  -7   28.20    8.20 
   5   9   7   43.40   11.70 
   7  -9   7   18.70    7.80 
  -7   9  -7   17.80    8.50 
   7   9   7   40.90    9.00 
   7   9   7   28.40    7.80 
   9  -9   7   14.20    8.00 
   9   9   7   12.80    7.20 
  -9   9  -7   18.10    8.90 
   9   9   7    3.10    7.30 
  11  -9   7   -2.00    8.40 
  11   9   7    7.10    6.90 
  11   9   7    3.10    7.20 
 -11   9  -7   -0.40    8.60 
  13  -9   7   14.10    9.10 
  13   9   7   14.10    8.00 
  13   9   7    6.80    6.70 
 -13   9  -7  -14.60    8.20 
  14 -10  -7    4.50    7.20 
 -14 -10   7  -11.10    8.70 
 -14  10   7   23.50    8.90 
 -14  10   7   -3.70   11.20 
  14  10  -7   15.00   12.70 
  12 -10  -7    5.40    6.40 
  12  10  -7   -1.70    6.70 
 -12  10   7    5.20    8.10 
 -12  10   7   11.70   11.40 
  10 -10  -7    3.50    5.50 
  10  10  -7   14.30    7.20 
 -10  10   7    6.60   12.30 
 -10  10   7    0.70   10.40 
   8  10  -7   -6.60    8.70 
  -8  10   7   -5.10    7.90 
   8  10  -7    4.30    6.40 
  -8  10   7    4.60    9.70 
  -6 -10   7   19.90    6.00 
  -6  10   7    9.80    8.00 
   6  10  -7    9.50    6.10 
  -6  10   7   25.50    9.40 
   6  10  -7   20.50    5.70 
  -4 -10   7    7.50    4.70 
  -4  10   7   -1.60    7.80 
   4  10  -7    5.60    5.00 
   4  10  -7   -1.90    8.30 
  -4  10   7   -8.30    6.90 
  -2 -10   7    8.50    4.90 
   2  10  -7   17.00    5.20 
  -2  10   7   12.50    7.50 
   0 -10   7   -2.20    4.20 
   0 -10   7   -0.50    6.60 
   0  10   7    2.10   13.50 
   0  10  -7    8.00    6.00 
   0  10   7    2.30    6.20 
   2 -10   7    6.30    5.80 
   2 -10   7    8.90    4.90 
  -2  10  -7    7.00    6.30 
   2  10   7    3.10    5.90 
   2  10   7   11.70    9.30 
   4 -10   7    6.40    6.30 
   4 -10   7    8.50    5.20 
   4  10   7    8.70    7.40 
  -4  10  -7    7.00    7.20 
   6 -10   7   10.10    7.10 
  -6  10  -7   12.50    7.80 
   6  10   7    7.80    6.10 
   6  10   7   -4.10    7.20 
   8 -10   7   11.40    7.70 
  -8  10  -7   -2.10    8.00 
   8  10   7    6.90    6.60 
   8  10   7   -2.30    7.00 
  10 -10   7    3.00    8.10 
 -10  10  -7   -3.40    8.50 
  10  10   7   -4.90    6.40 
  10  10   7    3.80    6.60 
  12 -10   7    4.00    8.60 
  12  10   7   13.70    6.90 
 -12  10  -7    9.40    8.90 
  13 -11  -7    2.80    6.20 
 -13  11   7   21.00    8.60 
  13  11  -7    7.70   14.60 
  11 -11  -7    0.60    5.40 
  11  11  -7   13.20    7.30 
 -11  11   7    5.50    8.40 
 -11  11   7    4.10   11.20 
   9  11  -7   -3.60    6.50 
  -9  11   7    6.00   13.30 
  -9  11   7    1.00   10.00 
  -7  11   7   10.60    8.60 
   7  11  -7   27.90    7.30 
  -7  11   7   16.70    9.90 
  -5 -11   7    7.60    7.20 
  -5  11   7   -1.10    7.90 
   5  11  -7    1.30    6.10 
  -5  11   7    5.80    8.70 
  -3 -11   7   19.50    5.50 
   3  11  -7   17.10    6.30 
  -3  11   7    9.90    8.40 
  -3  11   7   21.10    8.60 
  -1 -11   7   -3.80    4.30 
  -1  11   7    4.40    8.00 
  -1  11   7   -0.80    6.70 
   1 -11   7   10.40    6.50 
   1 -11   7   26.50    5.90 
  -1  11  -7    8.90    6.60 
   1  11   7   15.30    7.20 
   1  11   7   24.70    8.40 
   3 -11   7    5.70    5.00 
   3 -11   7   -3.30    5.90 
   3  11   7    4.10    7.60 
  -3  11  -7  -11.00    6.40 
   3  11   7    6.80    6.50 
   5 -11   7    5.60    7.00 
  -5  11  -7    7.00    7.50 
   5  11   7   12.50    6.60 
   5  11   7   11.50    8.00 
   7 -11   7    5.60    7.20 
   7  11   7    3.50    6.40 
   7  11   7    1.80    7.20 
  -7  11  -7    2.50    8.00 
   9 -11   7   -5.40    7.40 
   9  11   7   -0.20    6.50 
  -9  11  -7    8.30    8.30 
   9  11   7    2.40    6.90 
  11 -11   7    6.20    8.10 
  11  11   7   -3.30   10.90 
 -11  11  -7   -2.90    8.50 
  11  11   7   10.00    6.80 
  12 -12  -7    4.80    5.70 
  12  12  -7    4.80   14.10 
 -12  12   7   17.50    8.30 
 -12  12   7   -1.30   12.00 
 -10  12   7   -7.20    7.80 
 -10  12   7   -0.10   10.40 
  10  12  -7   -1.20    6.60 
  -8  12   7    5.80    8.10 
   8  12  -7   11.90    7.20 
  -8  12   7   11.50   10.60 
  -6  12   7   14.80    9.70 
  -6  12   7    6.80   19.00 
   6  12  -7   -4.20    6.10 
  -4 -12   7   20.70    5.80 
  -4  12   7   21.60    9.30 
  -4  12   7   11.40   10.80 
   4  12  -7   26.80    7.30 
  -2 -12   7    1.70    4.90 
   2  12  -7    3.60    6.00 
  -2  12   7    4.90   10.10 
  -2  12   7    0.40    8.00 
   0 -12   7   35.00    7.50 
   0 -12   7   16.80    5.70 
   0  12   7   21.70    8.80 
   0  12  -7   20.20    6.90 
   0  12   7   24.60    9.00 
   2 -12   7    5.70    5.40 
   2 -12   7    6.90    6.50 
   2  12   7   -0.50    6.20 
  -2  12  -7   -4.10    6.80 
   2  12   7    1.20    7.70 
   4 -12   7    8.10    5.70 
   4 -12   7   15.10    6.90 
   4  12   7   13.50    7.10 
  -4  12  -7    9.50    7.90 
   4  12   7   33.60    8.90 
   6 -12   7   -2.80    6.80 
   6  12   7    3.60    7.80 
   6  12   7   -4.30    5.80 
  -6  12  -7  -14.90    7.50 
   8 -12   7    7.80    8.10 
   8  12   7   21.40    8.00 
   8  12   7   15.80    7.30 
  -8  12  -7    9.90    8.60 
  10 -12   7   13.30    8.20 
  10  12   7   -5.60    7.60 
 -10  12  -7   -4.60   10.00 
  10  12   7    2.60    6.70 
 -11  13   7   14.90    8.10 
 -11  13   7    6.10   11.30 
  11  13  -7    0.70    9.60 
  -9  13   7   10.30    8.20 
  -9  13   7   16.70   11.10 
   9  13  -7   14.00    7.40 
  -7  13   7    1.20    8.00 
   7  13  -7   -8.50    6.40 
  -7  13   7  -15.10    9.70 
  -5  13   7   13.50    9.80 
   5  13  -7   22.80    7.50 
  -5  13   7    1.00    7.90 
  -3  13   7    5.30    9.10 
  -3  13   7    3.10    7.60 
   3  13  -7   -2.00    6.30 
  -1 -13   7    7.40    5.90 
  -1  13   7    4.50    8.40 
  -1  13   7    9.20    7.90 
   1 -13   7    5.00    6.30 
   1 -13   7    0.60    5.60 
  -1  13  -7    1.20    6.80 
   1  13   7    9.50    7.20 
   1  13   7    2.20    8.10 
   3 -13   7   12.20    7.10 
   3  13   7    6.80    8.10 
  -3  13  -7    9.60    8.00 
   3  13   7    4.60    6.90 
   5 -13   7   -3.60    6.10 
   5  13   7    6.10    6.40 
  -5  13  -7    1.00    7.90 
   5  13   7    8.90    8.00 
   7 -13   7    6.00    7.40 
   7  13   7   -7.90    7.10 
   7  13   7   -1.20    6.40 
  -7  13  -7    0.60    8.10 
  -8  14   7  -12.60    6.90 
  -8  14   7   20.90   17.30 
   8  14  -7    5.50    7.00 
  -6  14   7   18.80    8.50 
   6  14  -7   11.20    7.30 
  -6  14   7    2.90    9.70 
  -4  14   7   13.40    9.60 
   4  14  -7   -5.80    6.40 
  -4  14   7   -5.10    7.70 
  -2  14   7   14.00    8.50 
  -2  14   7    8.00    9.00 
   2  14  -7   15.80    7.40 
   0  14   7    8.50    7.40 
   0  14  -7    4.80    6.20 
   0  14   7   -2.00    8.10 
   2 -14   7   21.00    7.50 
   2  14   7   10.60    8.50 
   2  14   7   11.80    7.30 
  -2  14  -7   17.90    7.60 
   4 -14   7   -0.20    6.80 
  -4  14  -7    3.70    7.80 
   4  14   7   -5.10    7.90 
   4  14   7    0.60    6.30 
   6  14   7    9.60    8.30 
  -6  14  -7   18.10    8.60 
   6  14   7   -1.20    6.10 
   7  15  -7   32.90   11.90 
  -7  15   7    3.80   10.10 
  -7  15   7    6.70    8.50 
   5  15  -7    5.40    6.60 
  -5  15   7    4.30    8.10 
  -5  15   7   16.10   15.10 
   3  15  -7   -2.30    7.10 
  -3  15   7    0.10    9.30 
  -3  15   7    0.80    7.60 
  -1  15   7   11.70    9.10 
   1  15  -7    5.70    6.70 
  -1  15   7    0.30    7.00 
  -1  15  -7    7.50    6.70 
   1  15   7   15.80    9.00 
   1  15   7    9.70    7.60 
   3 -15   7   13.60    9.90 
   3  15   7  -13.30    7.60 
  -3  15  -7   -2.10    7.30 
   3  15   7   -5.10    6.10 
   2  16  -7    0.80    7.60 
   0  16  -7    5.40    7.40 
  18   0  -8   38.20    9.90 
 -18   0   8   15.50    9.30 
 -16   0   8   17.10    9.60 
  16   0  -8   11.90    7.90 
  14   0  -8  164.78   18.00 
 -14   0   8  167.28   19.40 
 -12   0   8   36.70    9.90 
  12   0  -8   48.60   15.00 
 -12   0   8   41.10    8.10 
 -10   0   8  517.55   35.80 
  10   0  -8  499.85   35.30 
 -10   0   8  519.15   35.00 
  -8   0   8  157.78   14.90 
  -8   0   8  119.39   16.50 
   8   0  -8  129.49   14.10 
   6   0  -8 1002.90   66.29 
  -6   0   8 1074.49   66.39 
  -6   0   8 1097.69   66.39 
   4   0  -8  277.07   20.90 
  -4   0   8  278.37   19.80 
  -4   0   8  278.37   19.30 
  -2   0   8 1654.93   97.49 
   2   0  -8 1517.55   96.89 
   2   0   8 1257.87   79.69 
   2   0   8 1354.46   81.39 
   4   0   8  384.26   27.20 
   4   0   8  417.26   28.20 
   6   0   8  640.64   43.00 
   6   0   8  658.33   42.10 
   8   0   8  209.08   19.70 
   8   0   8  255.27   20.20 
  10   0   8  188.78   19.50 
  12   0   8   91.89   14.90 
 -12   0  -8  127.19   14.50 
  14   0   8   16.90   11.60 
 -14   0  -8   57.79   11.20 
 -17  -1   8   30.20   10.30 
  17  -1  -8   20.80    8.90 
  17   1  -8   23.10    9.00 
 -17   1   8   29.70   10.20 
 -15  -1   8   76.29   12.20 
  15  -1  -8   44.80    9.90 
 -15   1   8   72.09   11.90 
  15   1  -8   55.39   10.30 
 -13  -1   8  141.99   22.50 
  13  -1  -8  156.78   16.90 
  13   1  -8  168.58   17.10 
 -13   1   8  130.69   18.50 
  11  -1  -8  185.68   17.10 
 -11  -1   8  174.28   18.00 
 -11  -1   8  164.08   16.60 
 -11   1   8  159.78   16.80 
  11   1  -8  167.88   17.00 
 -11   1   8  185.58   18.30 
  -9  -1   8  465.55   31.80 
   9  -1  -8  454.35   31.00 
  -9   1   8  443.26   31.40 
   9   1  -8  443.36   31.10 
  -9   1   8  420.46   30.50 
  -7  -1   8  330.27   22.90 
   7  -1  -8  329.57   22.60 
  -7  -1   8  316.37   24.60 
   7   1  -8  309.27   22.70 
  -7   1   8  264.57   22.00 
  -7   1   8  286.27   22.50 
  -5  -1   8 1004.50   61.69 
  -5  -1   8  986.10   61.69 
  -5   1   8  978.80   61.59 
   5   1  -8 1015.10   61.99 
  -5   1   8  948.01   61.59 
  -3   1   8  360.06   25.00 
  -1  -1   8 1755.52  107.69 
   1  -1   8  277.57   19.70 
   1  -1   8  260.37   17.90 
   1   1   8  259.27   19.90 
   3  -1   8 1282.37   80.69 
   3  -1   8 1331.17   81.89 
   3   1   8 1327.37   82.09 
   5  -1   8  128.69   12.60 
   5  -1   8  148.39   14.30 
   5   1   8  138.59   16.20 
   5   1   8  116.79   13.70 
   7  -1   8  699.53   46.40 
   7  -1   8  694.43   45.80 
   7   1   8  727.03   45.50 
   7   1   8  682.83   46.20 
   9  -1   8   35.80    9.30 
   9   1   8   36.00    8.30 
   9   1   8   14.30    8.00 
  11  -1   8  215.38   22.20 
 -11   1  -8  267.07   22.20 
  11   1   8  183.18   21.50 
  13  -1   8   11.60   10.00 
 -13  -1  -8   -1.80    9.10 
 -13   1  -8   33.00    9.70 
  13   1   8   -9.10    9.00 
 -15  -1  -8   60.59   13.90 
  15  -1   8   62.39   13.90 
  15   1   8   21.00   11.00 
 -15   1  -8   50.59   11.20 
 -16  -2   8   10.80    9.50 
  16  -2  -8   12.40    8.30 
  16   2  -8   14.60    8.30 
 -16   2   8   17.30    9.40 
 -16   2   8   -3.40    8.50 
  14  -2  -8  136.49   17.00 
 -14  -2   8  135.09   18.40 
  14   2  -8  144.29   16.80 
 -14   2   8  148.99   18.10 
  12  -2  -8   35.10    8.80 
 -12  -2   8   33.00    9.30 
 -12  -2   8   13.50    7.30 
 -12   2   8   29.00    9.30 
 -12   2   8   20.80   10.10 
  12   2  -8   43.60    8.50 
 -10  -2   8  382.66   27.50 
  10  -2  -8  365.46   26.60 
 -10  -2   8  358.36   26.50 
 -10   2   8  332.87   26.60 
  10   2  -8  394.26   27.00 
 -10   2   8  353.86   27.80 
 -10   2   8  351.06   27.10 
  -8  -2   8   73.19    9.60 
  -8  -2   8   59.99    8.20 
   8  -2  -8   64.39    8.70 
   8   2  -8   73.59    9.20 
  -8   2   8   64.09    9.30 
  -8   2   8   55.69    9.50 
  -6  -2   8  663.13   42.90 
   6  -2  -8  641.24   42.50 
  -6  -2   8  666.33   42.80 
  -6   2   8  648.44   42.80 
  -6   2   8  715.33   43.90 
   6   2  -8  637.64   42.90 
  -4   2   8  127.49   16.50 
  -4   2   8  101.49   11.30 
   4   2  -8  105.39   10.90 
  -2  -2   8  813.52   49.40 
  -2   2   8  736.43   50.39 
   2   2  -8  819.42   49.50 
   0  -2   8  130.59   12.10 
   0  -2   8  127.29   10.80 
   0   2   8  131.59   13.40 
   2  -2   8  567.84   36.60 
   2  -2   8  582.24   35.40 
   2   2   8  508.15   36.60 
   4  -2   8  110.69   11.40 
   4  -2   8  120.29   13.50 
   4   2   8  115.59   13.50 
   6  -2   8  224.88   18.30 
   6   2   8  222.28   18.80 
   8  -2   8   62.49   10.00 
   8   2   8   52.59    9.40 
   8   2   8   76.09   10.10 
  10   2   8   29.00    9.40 
 -10   2  -8   64.09   10.60 
  10   2   8   58.59    9.60 
  12  -2   8   25.10   11.20 
 -12   2  -8   17.10    9.20 
  12   2   8   30.60   10.90 
 -14  -2  -8    3.00    9.50 
  14  -2   8   16.40   11.00 
  14   2   8  -10.60    9.00 
 -14   2  -8    3.40    9.00 
 -17  -3   8   18.20   10.00 
  17  -3  -8   45.90   10.20 
 -17   3   8   20.80    9.70 
 -17   3   8   27.00    9.80 
  15  -3  -8   46.20   10.10 
 -15  -3   8   47.30   10.90 
 -15   3   8   61.29   11.50 
  15   3  -8   41.00    9.50 
 -15   3   8   18.50   13.50 
  13  -3  -8  142.09   15.90 
 -13  -3   8  109.39   13.40 
 -13   3   8   74.39   13.80 
  13   3  -8  130.59   15.60 
 -13   3   8   99.29   15.90 
  11  -3  -8  130.09   15.10 
 -11  -3   8  104.19   14.40 
 -11  -3   8  128.49   15.90 
 -11   3   8  129.19   15.20 
 -11   3   8  119.69   15.70 
   9  -3  -8  424.06   28.60 
  -9  -3   8  389.36   29.30 
  -9   3   8  383.76   29.00 
   9   3  -8  420.56   28.80 
  -9   3   8  386.36   29.80 
  -7  -3   8  264.47   21.10 
   7  -3  -8  275.67   20.20 
  -7  -3   8  235.88   20.00 
  -7   3   8  262.37   21.60 
   7   3  -8  285.47   20.80 
  -7   3   8  289.27   20.90 
   5   3  -8  971.20   59.39 
  -5   3   8  914.11   59.29 
  -5   3   8  940.71   59.59 
   3   3  -8  332.97   22.40 
  -3   3   8  310.57   23.70 
  -3   3   8  333.57   22.60 
  -1  -3   8 1379.86   84.29 
  -1   3   8 1357.16   85.19 
   1  -3   8  227.88   20.00 
   1  -3   8  279.17   17.90 
   1   3   8  243.98   20.10 
   3  -3   8 1237.08   74.79 
   3   3   8 1175.18   75.79 
   5  -3   8  149.79   13.80 
   5   3   8  137.09   15.20 
   7  -3   8  586.84   42.00 
  -7   3  -8  628.14   42.90 
   7   3   8  676.33   42.30 
   9  -3   8   44.90   10.10 
  -9   3  -8   32.50    9.40 
   9   3   8   48.30    8.70 
  11  -3   8  235.48   24.40 
 -11   3  -8  272.57   23.80 
  11   3   8  268.17   22.40 
  13  -3   8   29.00   10.90 
 -13   3  -8   18.80    9.00 
  13   3   8   13.30    9.10 
 -15  -3  -8   78.99   12.40 
  15   3   8   37.30   11.40 
 -15   3  -8   57.09   11.20 
 -16  -4   8    9.60    9.00 
  16  -4  -8    0.40    8.00 
 -16   4   8    0.30    8.70 
 -16   4   8   15.80    8.90 
  16   4  -8    6.40    7.90 
 -14  -4   8   84.79   12.80 
  14  -4  -8   86.59   12.30 
 -14   4   8   97.59   13.20 
  14   4  -8  130.99   15.70 
 -12  -4   8   34.10   11.20 
  12  -4  -8   19.00    8.60 
  12   4  -8   19.20    7.70 
 -12   4   8   21.20   10.90 
 -12   4   8   24.00    9.00 
  10  -4  -8  295.57   23.40 
 -10  -4   8  312.97   24.70 
 -10  -4   8  271.67   22.90 
 -10   4   8  299.67   23.80 
 -10   4   8  283.37   25.90 
  10   4  -8  345.67   23.80 
  -8  -4   8   76.79   10.50 
  -8  -4   8   66.09    8.80 
   8  -4  -8   70.19    9.10 
  -8   4   8   70.49    9.90 
  -8   4   8   93.89   11.40 
   8   4  -8   65.89    9.20 
  -6  -4   8  594.84   39.90 
  -6  -4   8  647.84   39.50 
   6   4  -8  587.04   39.50 
  -6   4   8  588.74   39.70 
  -6   4   8  586.54   40.10 
   4   4  -8  158.18   13.80 
  -4   4   8  153.28   14.40 
  -4   4   8  155.08   15.30 
  -2   4   8  829.82   49.40 
  -2   4   8  733.43   50.29 
   0  -4   8  278.67   19.60 
   0   4   8  284.47   22.00 
   2  -4   8  713.03   45.30 
  -2   4  -8  726.03   46.50 
   2   4   8  735.33   45.40 
   2   4   8  686.03   46.70 
   4  -4   8  233.28   18.90 
  -4   4  -8  273.17   20.60 
   4   4   8  247.48   20.40 
   6  -4   8  377.36   27.50 
   6   4   8  399.76   26.80 
  -6   4  -8  386.86   28.90 
   6   4   8  377.76   28.40 
   8  -4   8  135.59   16.70 
   8   4   8  160.48   17.50 
  10  -4   8  150.58   16.80 
  10   4   8  152.78   16.90 
 -10   4  -8  173.98   19.20 
  12  -4   8   60.39   13.00 
  12   4   8   66.49   10.40 
 -12   4  -8   76.19   12.10 
  14  -4   8   22.70   11.70 
  14   4   8   23.50   10.20 
 -17  -5   8    4.10    8.40 
 -17   5   8   10.30    9.00 
  17   5  -8   20.80    8.40 
 -17   5   8   18.70    8.80 
 -15  -5   8   27.80    9.40 
  15  -5  -8   31.40    9.20 
  15   5  -8   35.80    9.30 
 -15   5   8   38.80    9.80 
 -15   5   8   22.30   10.50 
 -13  -5   8   48.60   10.90 
  13  -5  -8   67.29   10.30 
 -13   5   8   44.90   12.50 
 -13   5   8   28.20   13.00 
  13   5  -8   53.09    9.70 
 -11  -5   8   68.39   10.00 
  11  -5  -8   66.59   10.00 
 -11   5   8   60.59   12.50 
  11   5  -8   77.89   10.50 
 -11   5   8   78.89   11.20 
   9  -5  -8  170.68   16.50 
  -9  -5   8  123.39   17.50 
  -9  -5   8  197.48   18.40 
  -9   5   8  184.68   17.80 
   9   5  -8  228.68   17.60 
  -9   5   8  184.28   20.30 
  -7  -5   8  124.99   14.10 
  -7   5   8  172.08   15.60 
   7   5  -8  162.68   14.80 
  -7   5   8  148.49   17.10 
  -5  -5   8  470.05   30.80 
  -5   5   8  453.25   32.30 
  -5   5   8  460.95   31.90 
   5   5  -8  471.45   31.20 
   3   5  -8  148.89   12.60 
  -3   5   8  138.29   13.40 
  -3   5   8  141.59   14.80 
  -1  -5   8  659.63   42.40 
  -1   5   8  665.53   43.90 
  -1   5   8  676.33   42.60 
   1  -5   8   96.49   10.00 
   1   5   8   94.89   12.60 
  -1   5  -8   94.09   11.80 
   1   5   8   91.69   10.20 
   3  -5   8  618.34   41.10 
   3   5   8  653.63   42.70 
  -3   5  -8  633.14   42.10 
   3   5   8  647.84   41.30 
   5  -5   8   30.40    7.10 
  -5   5  -8   27.20    7.80 
   5   5   8   33.10    7.90 
   5   5   8   36.70    6.70 
   7  -5   8  322.37   26.00 
   7   5   8  389.46   27.40 
  -7   5  -8  340.97   27.30 
   7   5   8  349.27   26.20 
   9  -5   8    4.70    8.10 
   9   5   8   10.40    6.80 
   9   5   8   21.70    7.50 
  -9   5  -8   15.90    8.60 
  11  -5   8  116.39   15.40 
  11   5   8  127.19   16.00 
 -11   5  -8  145.99   18.00 
  13  -5   8   10.10   10.30 
  13   5   8    6.10    7.60 
  13   5   8    6.90    7.30 
 -13   5  -8   27.40   10.00 
 -16  -6   8   15.50    9.10 
  16  -6  -8    5.80    8.50 
 -16   6   8    3.60    9.00 
 -16   6   8   -7.10    8.20 
 -14  -6   8   64.79   11.80 
  14  -6  -8   64.69   11.40 
 -14   6   8   59.99   11.50 
  14   6  -8   84.99   11.30 
 -12  -6   8    7.30    8.50 
  12  -6  -8   18.90   14.00 
 -12   6   8   21.00   14.70 
  12   6  -8   12.30    7.10 
 -12   6   8   -2.60   10.20 
 -10  -6   8  154.58   18.60 
  10  -6  -8  196.48   17.40 
 -10   6   8  195.18   18.90 
  10   6  -8  200.58   17.80 
 -10   6   8  167.98   21.60 
  -8  -6   8    5.60    5.50 
  -8   6   8   10.70    7.30 
  -8   6   8   18.50    9.00 
   8   6  -8    7.20    6.00 
  -6  -6   8  373.16   23.60 
  -6   6   8  337.67   25.90 
   6   6  -8  332.27   23.80 
   6   6  -8  273.47   25.30 
  -6   6   8  325.87   24.80 
  -4  -6   8   12.80    4.70 
  -4   6   8   18.50    6.50 
  -4   6   8   11.50    6.90 
   4   6  -8    8.10    5.20 
  -2   6   8  390.66   26.10 
  -2   6   8  352.96   27.00 
   0  -6   8   18.40    5.20 
   0   6  -8   23.30    7.10 
   0   6   8   14.00    5.20 
   0   6   8   16.30    6.90 
   2  -6   8  255.87   18.10 
   2   6   8  250.87   20.40 
   2   6   8  223.48   18.00 
  -2   6  -8  231.88   19.30 
   4  -6   8   20.50    6.20 
  -4   6  -8   17.60    7.20 
   4   6   8   25.30    7.70 
   4   6   8   15.70    5.60 
   6  -6   8  101.59   11.90 
   6   6   8  106.19   12.40 
   6   6   8  105.29   12.70 
  -6   6  -8  125.69   15.50 
   8  -6   8   21.30    7.90 
  -8   6  -8   19.70    8.40 
   8   6   8   33.60    7.50 
   8   6   8   33.60    8.70 
  10  -6   8   32.50    9.80 
  10   6   8   32.00    8.20 
  10   6   8   29.90    8.20 
 -10   6  -8   20.20    9.10 
  12  -6   8   15.00   10.30 
  12   6   8   38.50    8.50 
 -12   6  -8   10.00    9.70 
  14  -6   8   14.90   10.80 
  14   6   8    6.10    8.80 
 -14   6  -8   12.90    9.30 
  15  -7  -8   11.50    8.50 
 -15  -7   8   18.60    9.40 
 -15   7   8    1.30   10.10 
  15   7  -8   17.90    7.90 
 -15   7   8   22.30    9.10 
  13  -7  -8   35.10    9.20 
 -13  -7   8   53.09   10.70 
 -13   7   8   44.50   10.40 
 -13   7   8   12.70   11.40 
  13   7  -8   36.80    8.50 
  11  -7  -8   51.39    9.20 
 -11  -7   8   42.20   10.50 
 -11   7   8   47.50   12.20 
  11   7  -8   35.90    8.50 
 -11   7   8   51.99   10.90 
   9  -7  -8  132.79   14.20 
  -9  -7   8   82.09   16.40 
  -9   7   8  132.29   15.50 
  -9   7   8  120.39   16.20 
   9   7  -8  170.08   15.10 
  -7  -7   8   53.89    8.10 
   7   7  -8   54.89    8.80 
  -7   7   8   50.99    9.80 
  -7   7   8   78.49   11.20 
   7   7  -8   72.19    9.00 
  -5  -7   8  305.57   21.30 
  -5   7   8  320.07   24.10 
  -5   7   8  311.37   23.30 
   5   7  -8  257.77   21.50 
   5   7  -8  317.87   22.20 
   3   7  -8   98.79   10.80 
  -3   7   8   89.89   12.70 
  -3   7   8   85.29   10.80 
  -1  -7   8  467.95   32.30 
  -1   7   8  506.25   33.10 
  -1   7   8  506.95   34.10 
   1  -7   8   49.20    7.20 
  -1   7  -8   47.60    7.90 
   1   7   8   50.49    7.50 
   1   7   8   70.19    9.60 
   3  -7   8  496.95   33.40 
   3   7   8  520.05   35.20 
  -3   7  -8  471.65   34.30 
   3   7   8  514.75   33.90 
   5  -7   8   19.40    6.40 
   5   7   8   35.80    8.40 
  -5   7  -8   17.10    7.90 
   5   7   8   19.70    6.40 
   7  -7   8  279.87   23.80 
   7   7   8  325.37   24.90 
  -7   7  -8  307.17   25.40 
   7   7   8  315.67   23.70 
   9  -7   8   27.40    8.80 
  -9   7  -8   14.50    9.30 
   9   7   8   13.20    6.80 
   9   7   8   25.50    8.10 
  11  -7   8  111.29   14.30 
  11   7   8  133.99   15.20 
  11   7   8  107.09   14.90 
 -11   7  -8  107.59   14.40 
  13   7   8    5.80    6.90 
 -13   7  -8   13.60   10.90 
 -14  -8   8   23.40    9.90 
  14  -8  -8   22.20    8.50 
 -14   8   8   40.50   12.00 
  14   8  -8   40.00    9.00 
 -14   8   8   11.50    9.00 
 -12  -8   8   10.10    9.20 
  12  -8  -8    9.50    7.20 
  12   8  -8    5.20    6.80 
 -12   8   8    3.30   10.70 
 -12   8   8   -0.20    8.50 
  10  -8  -8   77.79    9.90 
 -10   8   8  101.39   14.50 
  10   8  -8   87.69   11.30 
 -10   8   8  131.39   17.20 
  -8  -8   8   16.20    6.30 
  -8   8   8   19.40   11.40 
  -8   8   8    9.20    8.10 
   8   8  -8    7.90    5.90 
   8   8  -8    6.70    6.30 
  -6  -8   8  173.38   15.10 
   6   8  -8  187.48   16.80 
  -6   8   8  162.68   19.20 
  -6   8   8  191.18   18.10 
  -4  -8   8   50.49    6.70 
  -4   8   8   42.40    8.70 
   4   8  -8   25.80    6.50 
  -4   8   8   61.79    9.60 
  -2   8   8  251.77   19.40 
  -2   8   8  217.08   20.20 
   0  -8   8   70.19    8.30 
   0   8   8   70.99   10.10 
   0   8  -8   60.49    7.70 
   0   8   8   60.29    8.50 
   2  -8   8  203.28   16.70 
  -2   8  -8  228.68   17.90 
   2   8   8  188.18   17.10 
   2   8   8  212.08   19.70 
   4   8   8   73.19    9.40 
  -4   8  -8   55.79    9.40 
   6  -8   8  125.59   15.00 
   6   8   8  131.09   16.30 
   6   8   8  129.99   14.50 
   8  -8   8   60.19   10.20 
   8   8   8   62.99   10.30 
   8   8   8   51.09    9.00 
  -8   8  -8   44.80   10.30 
  10  -8   8   44.80   10.30 
 -10   8  -8   64.09   11.10 
  10   8   8   60.09   10.10 
  10   8   8   59.59    9.90 
  12  -8   8   30.10   10.70 
  12   8   8   31.90    8.90 
 -12   8  -8   11.60   11.20 
  12   8   8   29.40    8.10 
  15  -9  -8   16.70    7.60 
 -15  -9   8    2.40   10.10 
  15   9  -8   13.10    7.50 
 -13  -9   8   15.00    9.40 
  13  -9  -8    3.30    6.90 
 -13   9   8    8.70    8.70 
  13   9  -8   14.90    7.80 
 -13   9   8   19.60   11.20 
  11  -9  -8   24.00    7.10 
 -11   9   8    9.80   10.90 
  11   9  -8    3.60    6.70 
 -11   9   8   19.40    9.20 
   9   9  -8   47.60    8.60 
  -9   9   8   52.39   14.80 
  -9   9   8   28.90   11.20 
  -7  -9   8   21.20    7.30 
   7   9  -8   20.50    6.60 
  -7   9   8   22.00    9.80 
  -7   9   8    4.70    8.00 
  -5  -9   8   80.99   10.40 
   5   9  -8   73.39    9.80 
  -5   9   8   88.19   17.60 
  -5   9   8  110.49   14.50 
   5   9  -8  101.79   12.40 
  -3  -9   8   12.10    4.60 
  -3   9   8   17.00    8.10 
  -3   9   8   23.30    7.30 
   3   9  -8    4.50    5.30 
  -1   9   8  149.09   16.70 
  -1   9   8  150.08   15.00 
   1  -9   8    3.30    9.20 
  -1   9  -8   13.70    6.10 
   1   9   8   11.30    5.90 
   1   9   8   15.40   10.60 
   3  -9   8  119.69   13.60 
   3   9   8  153.88   16.40 
   3   9   8  121.19   16.80 
  -3   9  -8  134.49   15.00 
   5  -9   8    7.30    6.40 
   5   9   8   -2.80    7.40 
  -5   9  -8    9.50    7.80 
   5   9   8    1.80    5.80 
   7  -9   8   77.99   10.80 
   7   9   8   74.29   11.10 
  -7   9  -8   75.09   11.00 
   7   9   8   59.39    9.90 
   9  -9   8   -0.10    7.60 
   9   9   8    4.40    6.40 
  -9   9  -8   10.40    8.70 
   9   9   8    0.30    7.10 
  11  -9   8   37.30   10.50 
  11   9   8   21.30    8.00 
  11   9   8   23.60    7.90 
 -11   9  -8   36.80    9.80 
  14 -10  -8   28.10    7.90 
 -14 -10   8   30.50   12.40 
 -14  10   8   13.10    8.80 
  14  10  -8   19.90    8.30 
 -14  10   8   18.60   16.10 
  12 -10  -8    6.00    6.00 
  12  10  -8   -5.30    6.40 
 -12  10   8    5.20    8.20 
 -12  10   8   -2.30   10.70 
 -10  10   8   54.69   10.60 
 -10  10   8   26.80   12.00 
  10  10  -8   66.69    9.80 
  -8  10   8    8.80   10.20 
  -8  10   8   11.40    9.80 
   8  10  -8    2.40    6.10 
  -6 -10   8   95.29   11.00 
   6  10  -8   83.89   10.30 
  -6  10   8   72.59   11.30 
  -6  10   8   63.79   11.70 
  -4 -10   8   -0.70    4.60 
  -4  10   8    2.70    7.80 
   4  10  -8   -2.30    5.30 
  -4  10   8    7.90    7.40 
  -2 -10   8   76.59    9.70 
  -2  10   8   87.29   11.40 
  -2  10   8   80.69   10.80 
   0 -10   8    4.40    5.50 
   0  10   8   -3.80    6.20 
   0  10   8    7.50    7.50 
   0  10  -8    4.80    5.60 
   2 -10   8   45.60    8.00 
   2  10   8   60.79   10.50 
   2  10   8   56.69    9.80 
  -2  10  -8   61.19    8.40 
   4 -10   8   10.00    6.50 
   4  10   8    1.10    7.50 
  -4  10  -8    6.80    7.00 
   4  10   8    2.90    6.00 
   6 -10   8    5.80    7.00 
  -6  10  -8   23.70    8.40 
   6  10   8   21.50    8.80 
   6  10   8   19.80    7.10 
   8 -10   8    4.00    7.50 
  -8  10  -8    7.70    8.10 
   8  10   8    6.70    7.70 
   8  10   8    2.10    6.50 
  10 -10   8   15.80    8.30 
 -10  10  -8   16.70    8.90 
  10  10   8   13.50    7.10 
  10  10   8   19.00    8.00 
  13 -11  -8    5.30    6.10 
 -13  11   8    5.10    8.20 
 -13  11   8   11.40   11.70 
  13  11  -8   13.90    7.60 
  11  11  -8    9.90    7.20 
 -11  11   8    3.10    8.10 
 -11  11   8   -0.60   10.80 
  -9  11   8   21.30   11.30 
   9  11  -8   28.50    8.10 
  -9  11   8   25.40    9.20 
   7  11  -8   25.00    7.50 
  -7  11   8   20.60   10.20 
  -7  11   8    8.20    8.40 
  -5 -11   8   60.39    8.00 
  -5  11   8   70.39   11.40 
  -5  11   8   31.70   10.80 
   5  11  -8   60.49    8.90 
  -3 -11   8   14.30    5.40 
   3  11  -8   18.50    6.40 
  -3  11   8   11.80    8.50 
  -3  11   8    6.20   12.20 
  -1  11   8   97.19   12.50 
  -1  11   8  131.99   16.30 
   1 -11   8   15.20    6.50 
   1  11   8   27.50    8.60 
  -1  11  -8   11.90    6.40 
   1  11   8    5.40    6.80 
   3 -11   8  120.59   14.20 
  -3  11  -8  130.69   14.90 
   3  11   8  139.89   16.90 
   3  11   8  113.79   14.80 
   5 -11   8    1.60    6.50 
   5  11   8    2.70    8.30 
   5  11   8    0.50    6.00 
  -5  11  -8    3.80    7.40 
   7 -11   8   89.19   11.60 
   7  11   8  114.69   12.70 
  -7  11  -8   76.09   11.10 
   7  11   8   74.79   11.10 
   9 -11   8    2.30    8.10 
   9  11   8    2.40    6.50 
   9  11   8   -0.20    7.20 
  -9  11  -8   10.90    8.70 
  12  12  -8    0.30    6.60 
 -10  12   8    8.30    8.20 
 -10  12   8    9.70   11.50 
  10  12  -8   21.30    8.20 
  -8  12   8  -19.70    9.50 
   8  12  -8   -1.10    6.50 
  -8  12   8    0.40    8.00 
  -6  12   8   28.10   10.50 
   6  12  -8   41.80    8.10 
  -6  12   8   24.60    9.20 
  -4 -12   8    8.20    5.70 
  -4  12   8   -2.60    8.20 
  -4  12   8   -4.10    8.60 
   4  12  -8   -0.90    6.10 
  -2 -12   8   38.10    7.30 
   2  12  -8   55.59    8.50 
  -2  12   8   47.70    9.60 
  -2  12   8   59.99   11.00 
   0 -12   8   12.20    5.30 
   0  12   8    6.30    8.20 
   0  12   8   10.70    7.00 
   2 -12   8   50.49    8.50 
   2  12   8   48.40    9.00 
   2  12   8   30.10    9.70 
  -2  12  -8   38.40    8.30 
   4 -12   8   10.20    6.90 
   4  12   8   18.90    9.00 
  -4  12  -8   10.70    7.60 
   4  12   8   20.50    7.40 
   6 -12   8   20.50    7.80 
   6  12   8   34.10    9.10 
   6  12   8   21.90    7.70 
  -6  12  -8   25.80    8.40 
   8  12   8   23.50    7.70 
   8  12   8   12.70    8.10 
  -8  12  -8   11.50    8.50 
   9  13  -8    0.40    6.80 
  -9  13   8   13.70    8.50 
  -7  13   8  -14.00    7.00 
   7  13  -8    6.00    7.10 
  -7  13   8   -4.50    9.60 
  -5  13   8   26.80   10.00 
   5  13  -8    9.10    7.10 
  -5  13   8   24.50    9.00 
  -3  13   8  -10.00    7.10 
  -3  13   8   -3.10    8.70 
   3  13  -8   -8.90    6.10 
  -1 -13   8   20.20    6.00 
  -1  13   8   23.70    9.40 
  -1  13   8   19.50    7.90 
   1 -13   8   -1.40    6.20 
  -1  13  -8   -4.60    6.50 
   1  13   8  -10.50    5.90 
   1  13   8   -3.90    7.70 
   3 -13   8   24.90    7.70 
   3  13   8   20.00    8.80 
  -3  13  -8   23.40    8.00 
   3  13   8   28.20    7.90 
   5 -13   8   -2.50    6.60 
  -5  13  -8   -2.60    7.30 
   5  13   8    1.40    6.30 
   5  13   8   -3.50    8.20 
   7 -13   8    8.30    7.30 
   7  13   8    8.50    7.10 
  -7  13  -8    8.70    8.00 
   7  13   8   14.80    8.40 
  -8  14   8    0.90    7.40 
  -8  14   8    3.40   10.50 
  -6  14   8   15.20   13.40 
  -6  14   8   24.70    9.20 
   6  14  -8   22.00    8.00 
  -4  14   8    5.20    8.30 
   4  14  -8    9.70    7.10 
  -4  14   8   -2.00    9.20 
   2  14  -8   24.00    8.00 
  -2  14   8   29.30   10.10 
  -2  14   8   28.30    9.00 
   0  14   8   13.20    8.60 
   0  14   8   -0.30    6.90 
   2 -14   8   10.60    6.80 
   2  14   8   15.30    8.90 
  -2  14  -8   18.40    7.70 
   2  14   8    7.40    7.20 
   4 -14   8   -4.60   13.70 
   4  14   8   11.70    8.60 
  -4  14  -8   17.70    8.10 
   4  14   8    2.00    6.50 
   6 -14   8    6.50    7.30 
  -6  14  -8    6.60    8.20 
   6  14   8    3.90    8.50 
  -5  15   8   27.10   10.60 
   5  15  -8    7.50    8.50 
  -5  15   8   -0.80    7.40 
   3  15  -8    2.80    9.40 
  -3  15   8   17.80   10.90 
  -3  15   8   -0.80    7.30 
  -1  15   8    1.40    7.20 
   1  15  -8   20.20    9.60 
   1  15   8   17.90   14.80 
  -1  15  -8    4.60    6.40 
   1  15   8   15.10    7.40 
   3 -15   8   19.00    7.30 
  -3  15  -8   29.10    8.10 
   3  15   8   20.50    7.90 
 -16   0   9   -5.20    8.60 
  16   0  -9   -5.70    7.10 
  14   0  -9   -3.40    6.70 
 -14   0   9   -1.90    9.00 
 -12   0   9   -3.70   12.60 
  12   0  -9    6.00    6.70 
  10   0  -9    3.60    5.90 
 -10   0   9    1.80    7.70 
 -10   0   9    4.50    6.10 
   8   0  -9    4.20    5.40 
  -8   0   9    4.40    6.70 
  -8   0   9    7.80    5.50 
  -6   0   9    3.50    5.50 
  -6   0   9   -5.70    4.00 
   6   0  -9    5.00    5.10 
   4   0  -9    4.80    4.50 
  -4   0   9    0.00    4.70 
   2   0  -9   -0.10    3.40 
   0   0   9    7.60    5.20 
   2   0   9    1.80    5.20 
   2   0   9    8.30    3.60 
   4   0   9    0.00    3.60 
   4   0   9    1.80    5.40 
   6   0   9    8.60    5.50 
   6   0   9   -1.70    5.50 
   8   0   9    4.40    6.00 
   8   0   9    0.90    6.70 
  10   0   9   10.20    8.30 
  12   0   9    0.90    8.60 
 -12   0  -9   -6.00    8.60 
  14   0   9    9.70   10.10 
 -14   0  -9   -0.10   14.60 
 -17  -1   9   15.30    9.70 
  17  -1  -9    6.50   14.40 
 -17   1   9  -14.70    8.40 
  15  -1  -9    3.00    7.20 
 -15  -1   9   -8.90    9.10 
  15   1  -9    6.00    7.40 
 -15   1   9   16.90    9.30 
  13  -1  -9    3.40    6.70 
 -13  -1   9    8.10    8.80 
  13   1  -9    5.80    7.10 
 -13   1   9    2.30    8.50 
 -11  -1   9   19.70    8.60 
  11  -1  -9   13.40    6.70 
 -11  -1   9   15.70    6.80 
 -11   1   9   19.90    8.50 
 -11   1   9   26.70    6.80 
  11   1  -9   21.20    8.90 
  -9  -1   9   35.20    6.70 
  -9  -1   9   27.10    8.40 
   9  -1  -9   40.40    7.50 
   9   1  -9   35.90    7.50 
  -9   1   9   33.90    8.20 
  -9   1   9   34.10    8.50 
   7  -1  -9   30.40    6.70 
  -7  -1   9   30.00    6.20 
  -7  -1   9   37.80    7.60 
  -7   1   9   33.30    7.00 
   7   1  -9   40.70    7.10 
  -7   1   9   34.30    7.40 
   5  -1  -9   84.69    8.90 
   5   1  -9   92.49    9.50 
  -5   1   9   79.29   10.80 
  -5   1   9   70.69    8.40 
  -3  -1   9   54.59    6.90 
   3   1  -9   56.19    7.00 
  -3   1   9   56.59    7.70 
  -1   1   9  111.19   12.60 
   1  -1   9   48.50    5.90 
   1  -1   9   49.60    7.30 
   1   1   9   45.30    7.50 
   3  -1   9   75.69    9.60 
   3  -1   9   79.39    9.20 
   3   1   9   91.29   10.40 
   5  -1   9   19.60    6.60 
   5  -1   9   22.70    6.00 
   5   1   9   30.60    7.20 
   7  -1   9   18.90    7.00 
   7  -1   9   37.80    7.70 
   7   1   9   15.40    6.70 
   7   1   9   19.70    7.20 
   9  -1   9    6.60    7.60 
   9   1   9    5.50    7.30 
   9   1   9   10.90    6.90 
  11  -1   9  -11.20    8.90 
 -11   1  -9   23.30    9.50 
  13  -1   9  -11.70    9.20 
 -13  -1  -9   -0.40    8.90 
  13   1   9   -0.80    8.40 
 -13   1  -9  -11.00    8.30 
 -16  -2   9   13.80    9.10 
  16  -2  -9   -4.10    7.30 
  16   2  -9   -2.70    7.20 
 -16   2   9   15.40    9.30 
  14  -2  -9    0.60    7.10 
 -14  -2   9   -1.30    9.00 
 -14   2   9    0.70    9.10 
  14   2  -9    8.30    7.40 
 -14   2   9   12.10    8.90 
 -12  -2   9   -4.00    8.70 
  12  -2  -9    5.00    7.40 
 -12  -2   9  -14.20    7.90 
 -12   2   9   -1.30   13.60 
  12   2  -9   10.10    6.90 
 -12   2   9    1.10    8.30 
 -10  -2   9   17.50    8.40 
  10  -2  -9   16.80    6.50 
  10   2  -9    7.70    6.40 
 -10   2   9   19.50    8.20 
 -10   2   9   23.20    5.90 
 -10   2   9   28.10    8.90 
  -8  -2   9   22.40    5.80 
  -8  -2   9   20.80    7.40 
   8  -2  -9   10.00    5.70 
  -8   2   9   12.20    7.30 
   8   2  -9    9.80    6.20 
  -8   2   9   16.80    7.10 
   6  -2  -9   29.80    6.00 
  -6  -2   9   15.80    5.30 
  -6  -2   9   16.60    6.50 
   6   2  -9   23.30    6.20 
  -6   2   9   41.20    7.30 
  -6   2   9   29.20    6.60 
  -4   2   9   29.40    6.60 
   4   2  -9   15.30    5.20 
  -4   2   9   12.90    5.30 
  -2  -2   9   34.70    5.50 
   2   2  -9   22.80    5.20 
  -2   2   9   44.30    7.10 
   0  -2   9   13.30    4.10 
   0  -2   9   13.70    5.10 
   0   2   9   14.80    6.30 
   2  -2   9   33.30    5.40 
   2  -2   9   35.00    6.80 
   2   2   9   30.00    7.20 
   4  -2   9    8.50    5.70 
   4  -2   9    0.00    4.30 
   4   2   9    6.20    6.10 
   6  -2   9   15.40    6.60 
   6   2   9   16.10    6.80 
   8  -2   9   13.30    7.60 
   8   2   9    4.70    6.40 
  10  -2   9    9.90    8.60 
  10   2   9   13.90    7.30 
  10   2   9    9.20    7.50 
 -10   2  -9    8.10    8.70 
  12  -2   9    5.80    9.80 
 -12   2  -9   -0.60    8.60 
  12   2   9    1.20    7.90 
 -14  -2  -9    4.00   11.10 
  14  -2   9    4.70   10.00 
  14   2   9    1.20    8.60 
 -14   2  -9    1.60    8.90 
 -17  -3   9   13.20    9.70 
 -17   3   9    8.60    8.80 
  17   3  -9   20.40    8.40 
 -17   3   9   -2.60    8.70 
 -15  -3   9   19.70   10.00 
  15  -3  -9   14.30    8.30 
  15   3  -9   35.00    8.90 
 -15   3   9    9.30    9.10 
 -15   3   9  -15.40   19.20 
 -13  -3   9   18.90    9.80 
  13  -3  -9   11.50    7.20 
  13   3  -9   13.90    7.40 
 -13   3   9   -8.80    9.10 
 -13   3   9   11.10    9.10 
 -11  -3   9   35.10    8.70 
 -11  -3   9   58.29   14.50 
  11  -3  -9   56.79    9.20 
  11   3  -9   57.59    9.50 
 -11   3   9   57.39   11.10 
 -11   3   9   52.29   10.30 
   9  -3  -9   57.59    8.70 
  -9  -3   9   48.60    9.00 
  -9  -3   9   64.79    9.80 
  -9   3   9   84.99   11.10 
   9   3  -9   67.89    9.60 
  -9   3   9   52.49    9.50 
   7  -3  -9  116.89   12.60 
  -7  -3   9  123.79   14.10 
  -7  -3   9  129.89   12.40 
  -7   3   9  124.69   14.00 
   7   3  -9  126.29   13.50 
  -7   3   9  123.19   15.00 
   5   3  -9  122.29   12.30 
  -5   3   9  125.39   12.70 
  -5   3   9  125.69   14.10 
  -3   3   9  173.58   16.70 
  -3   3   9  195.68   14.60 
   3   3  -9  179.08   14.70 
  -1  -3   9  138.49   12.30 
  -1   3   9  137.19   14.20 
   1  -3   9  169.98   13.60 
   1  -3   9  176.48   15.10 
   1   3   9  171.88   16.60 
   3  -3   9  102.99   10.80 
   3   3   9   98.09   11.60 
   5  -3   9   92.89   12.00 
   5   3   9   98.99   11.90 
   7  -3   9   35.30    8.50 
  -7   3  -9   55.09   10.40 
   9  -3   9   27.40    9.20 
  -9   3  -9   26.50    9.60 
   9   3   9   50.29    9.40 
  11  -3   9   22.30   10.30 
 -11   3  -9    3.20    9.00 
  11   3   9   20.70    7.90 
  13  -3   9    2.90    9.90 
 -13   3  -9    4.70    8.90 
  13   3   9    9.60    7.70 
 -16  -4   9    0.10    8.90 
  16  -4  -9    2.30    8.00 
  16   4  -9    4.50    9.10 
 -16   4   9    6.30    8.50 
 -16   4   9   12.80    9.40 
  14  -4  -9    3.80    7.00 
 -14  -4   9    2.90    8.70 
  14   4  -9    0.10    7.10 
 -14   4   9    4.00   10.50 
 -14   4   9   16.00    9.20 
  12  -4  -9    3.50    8.10 
 -12  -4   9   -3.00    7.60 
  12   4  -9   13.50    7.10 
 -12   4   9   17.50   10.20 
 -12   4   9    3.30    8.30 
  10  -4  -9    6.50    6.50 
 -10  -4   9    1.50   12.50 
 -10  -4   9   20.10    5.70 
 -10   4   9   13.60    7.90 
  10   4  -9    4.40    6.50 
 -10   4   9   21.90    9.80 
  -8  -4   9   10.90    7.30 
  -8  -4   9   17.90    6.00 
   8  -4  -9   12.50    5.70 
   8   4  -9   14.50    6.20 
  -8   4   9   10.60    7.30 
  -8   4   9   -1.20    7.50 
  -6  -4   9   11.50    5.20 
  -6  -4   9   14.60    6.80 
  -6   4   9   19.20    6.60 
  -6   4   9   14.60    7.30 
   6   4  -9   12.20    5.90 
  -4   4   9   17.80    6.10 
  -4   4   9    3.50    6.50 
   4   4  -9   25.50    5.60 
  -2   4   9   33.20    7.50 
  -2   4   9   16.30    5.30 
   0  -4   9   26.70    5.20 
   0   4   9   14.00    6.50 
   0   4   9   12.40    4.40 
   2  -4   9   30.60    5.80 
   2   4   9   23.90    7.30 
   4  -4   9   17.60    5.70 
   4   4   9    9.60    6.30 
  -4   4  -9    9.40    7.40 
   6  -4   9    0.30    6.50 
  -6   4  -9    4.40    7.70 
   6   4   9    2.00    6.90 
   8  -4   9    8.80   11.40 
  -8   4  -9   11.80    8.40 
   8   4   9    2.20    6.60 
  10  -4   9    6.00    8.60 
 -10   4  -9    0.50    7.90 
  10   4   9    8.50    7.20 
  12  -4   9  -11.20    9.00 
  12   4   9    3.40    7.00 
 -12   4  -9    3.10    8.70 
 -14   4  -9   -5.90    8.30 
  14   4   9    9.20    8.50 
 -15  -5   9    3.00    8.80 
  15  -5  -9   -1.20    7.70 
 -15   5   9   -7.20    8.50 
  15   5  -9   -1.60    7.30 
 -15   5   9    1.00    9.10 
 -13  -5   9   -0.70    8.30 
  13  -5  -9    3.10    7.20 
  13   5  -9   -3.80    6.70 
 -13   5   9    2.50    8.90 
 -13   5   9    4.30   10.00 
 -11  -5   9    1.20    8.20 
  11  -5  -9    8.20    6.70 
  11   5  -9    1.70    6.50 
 -11   5   9    1.70   14.70 
 -11   5   9   -9.30    9.00 
   9  -5  -9   12.50    6.20 
  -9  -5   9   22.20   10.20 
  -9  -5   9   16.40    9.40 
  -9   5   9   -2.70    8.40 
  -9   5   9   15.60    8.00 
  -7  -5   9    3.10    4.90 
  -7  -5   9    4.10    7.10 
  -7   5   9    7.20    7.70 
   7   5  -9    3.30    5.60 
  -7   5   9    8.30    7.10 
   5   5  -9   48.20    7.50 
  -5   5   9   51.49    9.10 
  -5   5   9   35.60    8.00 
   3   5  -9    1.60    4.50 
  -3   5   9   -2.10    6.20 
  -3   5   9    1.50    5.30 
  -1   5   9   48.50    7.10 
   1   5  -9   54.39    6.90 
  -1   5   9   64.79    9.70 
   1  -5   9    6.00    4.60 
  -1   5  -9    1.10    5.70 
   1   5   9   -9.50    5.80 
   3  -5   9   34.00    6.80 
   3   5   9   39.10    8.20 
  -3   5  -9   30.60    7.60 
   5  -5   9    5.30    5.80 
  -5   5  -9    0.40    6.80 
   5   5   9   -3.10    4.70 
   5   5   9   -1.80    6.40 
   7  -5   9    8.70   12.00 
   7   5   9    8.80    5.90 
  -7   5  -9   13.60    8.60 
   7   5   9    8.60    7.40 
   9  -5   9    2.70    7.90 
   9   5   9   -2.20    7.10 
  -9   5  -9    8.80    8.10 
   9   5   9    3.60    6.10 
  11  -5   9   -8.30    8.70 
  11   5   9   -4.00    6.60 
 -11   5  -9   -2.60    8.50 
  13  -5   9   16.60   10.60 
  13   5   9    9.70    8.40 
 -16  -6   9    7.20    8.70 
  16  -6  -9   10.50    8.60 
  16   6  -9   13.90    8.00 
 -16   6   9   10.80    8.60 
 -16   6   9    4.10    9.10 
  14  -6  -9   17.70    8.10 
 -14  -6   9   13.10    9.30 
 -14   6   9    3.20   10.30 
 -14   6   9   27.90    9.70 
  14   6  -9    0.00    7.10 
 -12  -6   9   12.90    9.00 
  12  -6  -9   19.60    7.90 
 -12   6   9    6.10   10.10 
  12   6  -9    7.80    7.00 
 -12   6   9   18.60    9.10 
 -10  -6   9   44.30   10.00 
  10  -6  -9   38.30    7.90 
 -10  -6   9   24.20    7.20 
  10   6  -9   31.10    7.90 
 -10   6   9   36.00   13.40 
 -10   6   9   47.00   11.60 
  -8  -6   9   62.69   13.80 
  -8  -6   9   32.40    6.80 
  -8   6   9   58.99   10.60 
  -8   6   9   47.30    9.30 
  -6  -6   9   83.09   10.40 
  -6   6   9   65.09   10.20 
   6   6  -9   78.59    9.60 
  -6   6   9  108.29   12.00 
   4   6  -9   51.29    7.40 
  -4   6   9   63.49    9.20 
  -4   6   9   37.00    7.80 
  -2   6   9  121.49   12.50 
  -2   6   9  113.19   14.70 
   0  -6   9   37.30    6.30 
   0   6   9   48.50    8.80 
   0   6  -9   29.10    6.40 
   0   6   9   37.10    6.30 
   2  -6   9  105.99   11.40 
   2   6   9  106.89   12.50 
   2   6   9   91.99   11.50 
  -2   6  -9  132.99   13.60 
   4  -6   9   15.10    6.20 
  -4   6  -9   13.50    7.20 
   4   6   9   15.40    7.40 
   4   6   9   10.30    5.40 
   6  -6   9   68.29   10.50 
  -6   6  -9   47.10    9.60 
   6   6   9   63.49    8.90 
   6   6   9   65.19   10.40 
   8  -6   9   -1.10    7.30 
   8   6   9    4.50    7.20 
  -8   6  -9    8.70    8.00 
   8   6   9    3.00    5.80 
  10  -6   9   18.60    9.20 
 -10   6  -9   30.90    9.50 
  10   6   9   18.90    7.30 
  10   6   9   25.50    8.10 
  12  -6   9   -2.60    9.10 
 -12   6  -9    1.70    8.70 
  12   6   9    6.90    7.20 
 -15  -7   9   10.80    9.40 
  15  -7  -9   19.80    8.70 
 -15   7   9  -15.30    9.10 
 -15   7   9   19.50    9.00 
  13  -7  -9   19.50    8.20 
 -13  -7   9    7.30    8.80 
 -13   7   9    1.40   10.40 
  13   7  -9   12.40    7.60 
 -13   7   9   -1.70    8.50 
 -11  -7   9   59.59   10.90 
  11  -7  -9   39.50    8.30 
 -11   7   9   45.40   11.80 
 -11   7   9   48.00   10.20 
  11   7  -9   35.50    8.60 
  -9  -7   9   -1.00    7.70 
  -9  -7   9   30.70    9.20 
   9   7  -9   25.80    7.40 
  -9   7   9   31.20   15.70 
  -9   7   9   27.30   12.40 
  -7  -7   9   91.09   10.00 
   7   7  -9   99.59   12.30 
  -7   7   9   68.29   10.90 
  -7   7   9  111.09   12.90 
  -5  -7   9   61.89    7.70 
  -5   7   9   59.59   10.10 
  -5   7   9   47.80    9.10 
   5   7  -9   72.39    8.60 
  -3   7   9  139.39   14.90 
   3   7  -9  143.99   13.30 
  -3   7   9  151.08   16.50 
  -1   7   9   66.49    9.90 
  -1   7   9   59.99    8.20 
   1  -7   9  158.88   13.50 
  -1   7  -9  139.09   14.30 
   1   7   9  129.69   16.40 
   1   7   9  126.99   13.20 
   3  -7   9   47.00    7.50 
   3   7   9   35.50    7.30 
  -3   7  -9   46.80    8.30 
   3   7   9   48.60    9.90 
   5  -7   9   88.29   10.80 
  -5   7  -9   84.29   11.40 
   5   7   9   93.69   12.40 
   5   7   9   97.69   12.10 
   7  -7   9   22.70    8.20 
   7   7   9   10.60    8.40 
  -7   7  -9   15.70    8.50 
   7   7   9   18.60    6.80 
   9  -7   9   24.80    9.30 
  -9   7  -9   27.70    9.70 
   9   7   9   48.70    9.80 
   9   7   9   41.40    8.50 
  11  -7   9    8.70    9.10 
 -11   7  -9   12.00    9.20 
  11   7   9    1.80    6.80 
  11   7   9   12.40    7.50 
 -14  -8   9    4.60    8.80 
  14  -8  -9    2.50    7.20 
 -14   8   9   -8.00    9.50 
 -14   8   9  -12.10    8.20 
  14   8  -9    2.40    8.20 
 -12  -8   9   -9.30    8.50 
  12  -8  -9    0.60    6.60 
 -12   8   9  -21.50    9.70 
 -12   8   9   -4.60    8.30 
  12   8  -9    3.70    6.60 
 -10   8   9    8.00   10.60 
 -10   8   9    0.30    8.50 
  10   8  -9    3.00    6.60 
  -8  -8   9   13.60    5.90 
  -8   8   9   18.40    9.90 
   8   8  -9   -5.70    5.60 
  -6  -8   9    2.70    4.80 
  -6   8   9    7.60    7.40 
   6   8  -9   -2.30    5.50 
  -4   8   9   15.40    7.40 
  -4   8   9    2.30    7.30 
   4   8  -9    6.20    6.90 
  -2   8   9   13.10    6.80 
  -2   8   9    9.00    7.30 
   0  -8   9    2.50    5.00 
   0   8  -9    3.80    5.50 
   0   8   9    5.90    7.20 
   0   8   9   10.20    5.80 
   2  -8   9    7.60    9.80 
   2   8   9   17.30   12.40 
  -2   8  -9    3.70    6.40 
   2   8   9   19.40    7.60 
   4  -8   9   -5.00    5.70 
  -4   8  -9    4.10    7.00 
   4   8   9    5.10    5.80 
   4   8   9    9.70    8.10 
   6  -8   9   13.00    7.30 
   6   8   9    0.60    7.50 
   6   8   9    5.80    6.10 
  -6   8  -9   13.80    8.20 
   8  -8   9   -3.20    7.30 
   8   8   9    9.50    6.40 
  -8   8  -9    2.40    8.10 
   8   8   9    0.60    7.50 
  10  -8   9    1.70    8.60 
  10   8   9    4.10    6.60 
 -10   8  -9  -12.70    8.30 
  10   8   9    4.90    7.30 
  12  -8   9  -12.90    8.50 
 -12   8  -9   -1.00    9.00 
  12   8   9   12.40    8.30 
  12   8   9    7.20    6.60 
 -13  -9   9   -0.30    8.90 
  13  -9  -9    0.60    6.30 
 -13   9   9    1.90   10.30 
 -13   9   9   -3.00    8.50 
  13   9  -9    2.90    6.90 
 -11   9   9  -12.80   10.00 
 -11   9   9    3.50    8.50 
  11   9  -9   -3.30    6.30 
  -9   9   9    4.30   10.40 
   9   9  -9    6.10    6.70 
  -9   9   9    4.50    8.10 
  -7  -9   9   -0.20    5.10 
  -7   9   9    0.20    8.10 
  -7   9   9   17.30    9.40 
   7   9  -9    1.50    5.70 
  -5  -9   9   17.20    5.50 
   5   9  -9   21.60    6.60 
  -5   9   9    6.80   10.60 
  -5   9   9   18.80    9.00 
   3   9  -9    4.60    5.50 
  -3   9   9   -6.90    7.10 
  -3   9   9   -1.30    6.40 
  -1   9   9   26.90    8.20 
  -1   9   9   11.90    8.00 
   1  -9   9   -0.10    5.40 
  -1   9  -9    3.00    5.70 
   1   9   9    1.60    5.80 
   1   9   9    1.60    7.50 
   3  -9   9   17.00    6.60 
   3   9   9   10.70    6.40 
   3   9   9   15.80    8.70 
  -3   9  -9   14.00    6.80 
   5  -9   9   -5.60    6.20 
  -5   9  -9   -0.80    7.30 
   5   9   9   -5.60    7.50 
   5   9   9   -7.40    5.40 
   7  -9   9   14.30    7.70 
   7   9   9   -0.40    6.20 
  -7   9  -9   13.70    8.40 
   7   9   9   -0.10    7.70 
   9  -9   9    4.80    8.10 
   9   9   9    0.00    6.50 
   9   9   9    2.20    7.80 
  -9   9  -9   11.00    8.70 
  11  -9   9    6.20    8.90 
  11   9   9   -8.00    6.40 
 -12 -10   9   18.40   10.20 
 -12  10   9   -0.70    8.50 
 -12  10   9  -14.30   10.30 
  12  10  -9   18.90    7.50 
  10  10  -9    5.90    7.10 
 -10  10   9   -3.50    8.40 
 -10  10   9   -6.80   10.40 
  -8  10   9    9.40   10.50 
  -8  10   9   19.50    9.00 
   8  10  -9   11.80    6.80 
  -6 -10   9   14.00    5.90 
   6  10  -9   14.90    6.70 
  -6  10   9   20.10    9.50 
  -6  10   9    5.50    8.20 
  -4 -10   9   10.00    4.70 
   4  10  -9   17.30    6.40 
  -4  10   9   23.70    9.00 
  -4  10   9    4.30    7.60 
  -2  10   9   30.50    8.10 
  -2  10   9   23.40    8.80 
   0 -10   9   -5.10    5.30 
   0  10   9   12.70    6.70 
   0  10   9    5.50    8.00 
   2 -10   9   24.10    7.20 
   2  10   9   30.20    8.70 
  -2  10  -9   19.00    6.80 
   2  10   9   30.40    7.20 
   4 -10   9   -1.00    5.80 
  -4  10  -9   -6.50   11.30 
   4  10   9    3.60    8.10 
   4  10   9   10.20    6.20 
   6 -10   9   14.50    7.60 
   6  10   9   21.00    7.20 
   6  10   9   30.30    8.90 
  -6  10  -9   14.30    8.20 
   8 -10   9   -3.10    7.40 
   8  10   9    5.70    7.80 
   8  10   9    5.40    6.60 
  -8  10  -9  -10.90    7.70 
  10 -10   9    8.10    8.70 
 -10  10  -9    8.90   17.00 
  10  10   9   34.90   15.30 
 -11  11   9    8.70    8.60 
 -11  11   9    2.30   11.30 
  11  11  -9   18.50    8.20 
   9  11  -9   -3.10    6.30 
  -9  11   9   -0.60    8.30 
  -9  11   9   -7.00   10.20 
  -7  11   9   32.20   10.80 
   7  11  -9   34.30    8.10 
  -7  11   9   31.10    9.50 
  -5 -11   9    1.50    5.20 
  -5  11   9    5.10    8.80 
  -5  11   9    1.20    7.40 
   5  11  -9    6.00    6.40 
  -3  11   9   37.40    9.20 
  -3  11   9   37.70    9.80 
   3  11  -9   38.80    7.90 
  -1  11   9    0.20    8.10 
  -1  11   9    3.40    6.80 
   1 -11   9   36.80    7.40 
  -1  11  -9   25.30    6.50 
   1  11   9   36.30    9.60 
   1  11   9   26.60    7.60 
   3 -11   9   11.10    6.80 
   3  11   9    4.50    8.30 
  -3  11  -9   -6.80   12.10 
   3  11   9    6.40    6.40 
   5 -11   9   22.10    7.50 
   5  11   9   33.10    9.50 
   5  11   9   16.00    7.00 
  -5  11  -9    7.90    7.50 
   7 -11   9   -2.90    7.10 
   7  11   9   -3.10    7.70 
   7  11   9   -3.30    6.20 
  -7  11  -9    0.60    7.70 
   9 -11   9   11.50    8.50 
  -9  11  -9    4.50    8.70 
 -10  12   9    9.80    8.40 
  10  12  -9   10.10    9.80 
  -8  12   9    1.90   10.10 
  -8  12   9   17.00    8.70 
   8  12  -9   10.00    7.10 
   6  12  -9  -14.20    5.70 
  -6  12   9    6.80    9.20 
  -6  12   9   -3.10    7.40 
  -4 -12   9   17.60    5.60 
   4  12  -9    2.60    6.40 
  -4  12   9    9.90    8.40 
  -4  12   9   21.90    9.90 
  -2  12   9   13.00    7.50 
  -2  12   9    9.90    8.80 
   2  12  -9   -4.80    5.90 
   0  12   9   23.00    9.00 
   0  12   9    6.30    6.80 
   2 -12   9   11.20    6.80 
  -2  12  -9    0.80    7.30 
   2  12   9   -6.30    7.60 
   2  12   9    8.30    6.80 
   4 -12   9   18.70    7.40 
  -4  12  -9    1.00    7.10 
   4  12   9    4.30    6.30 
   4  12   9   19.00    9.10 
   6 -12   9   12.10    7.20 
   6  12   9    1.90    6.30 
  -6  12  -9    3.90    7.60 
   6  12   9   -3.30    7.60 
   8 -12   9    6.00    7.60 
  -8  12  -9   -5.70    7.60 
   8  12   9   19.00    9.60 
   8  12   9    1.60    8.30 
   9  13  -9   17.10    8.10 
  -9  13   9    7.20   10.80 
  -9  13   9    1.00    7.80 
  -7  13   9   -5.10    7.50 
   7  13  -9   -5.80    6.40 
  -7  13   9    2.20    9.70 
  -5  13   9   19.20    9.80 
  -5  13   9   12.10    8.60 
   5  13  -9    3.80    6.90 
  -3  13   9    8.40    7.20 
  -3  13   9   -0.10    8.80 
   3  13  -9   -7.80    6.10 
  -1 -13   9   17.00    5.60 
  -1  13   9   14.70    9.20 
  -1  13   9    9.50    7.40 
   1  13   9   -0.50    6.70 
  -1  13  -9    6.20    6.90 
   1  13   9   -7.80    8.00 
   3 -13   9   25.30    7.80 
  -3  13  -9   10.00    7.40 
   3  13   9   14.90    9.30 
   3  13   9   12.50    6.80 
   5  13   9    3.70    8.60 
   5  13   9    5.70    6.30 
  -5  13  -9    9.30    7.40 
  -6  14   9   -7.80    7.80 
  -6  14   9    5.10    9.90 
  -4  14   9    0.50    7.30 
   4  14  -9    1.90    7.30 
  -2  14   9    2.90    7.20 
  -2  14   9    1.70    9.40 
   2  14  -9    8.70    7.40 
   0  14   9  -10.50    8.20 
   0  14   9   -7.80    6.70 
   2  14   9    5.40    7.00 
  -2  14  -9    2.40    6.90 
   4 -14   9   -8.60    6.70 
  -4  14  -9    4.80    7.50 
   4  14   9    5.60    7.90 
   4  14   9    7.50    8.50 
   3  15  -9   15.40    7.90 
  -1  15   9    2.90    7.20 
   1  15  -9    5.00    7.30 
 -16   0  10  -15.80    8.60 
  16   0 -10    2.50    7.00 
 -14   0  10   52.19   11.20 
  14   0 -10   33.40    8.30 
  12   0 -10   -2.90    5.80 
 -12   0  10    1.20    8.20 
  10   0 -10  118.79   14.40 
 -10   0  10  140.69   13.70 
 -10   0  10  115.19   19.60 
  -8   0  10    4.70    6.70 
  -8   0  10    2.50    4.80 
   8   0 -10    6.80    5.30 
  -6   0  10  262.07   19.00 
   6   0 -10  242.08   19.40 
  -4   0  10   14.10   10.70 
   4   0 -10    8.60    4.70 
  -2   0  10  435.36   26.90 
   2   0 -10  344.67   25.40 
   0   0  10   -2.40    5.30 
   2   0  10  326.67   21.70 
   2   0  10  328.37   24.40 
   4   0  10   -3.90    5.10 
   4   0  10    5.50    4.30 
   6   0  10  198.48   18.20 
   6   0  10  195.38   16.10 
   8   0  10    9.20    6.70 
   8   0  10   10.70    6.90 
  12   0  10   18.00    9.00 
 -12   0 -10   11.20    9.40 
 -17  -1  10    1.40    9.40 
  17  -1 -10   -8.00    7.30 
 -17   1  10   11.00    9.20 
  17   1 -10    2.80    7.50 
 -15  -1  10   19.90   10.10 
  15  -1 -10   24.60    8.40 
  15   1 -10   25.80    8.20 
 -15   1  10   18.70    9.90 
  13  -1 -10   14.50    7.30 
 -13  -1  10    7.30    9.20 
 -13   1  10    1.10    8.80 
  13   1 -10   11.30    7.30 
 -11  -1  10   48.40   10.20 
  11  -1 -10   46.60    9.20 
  11   1 -10   38.60    8.40 
 -11   1  10   36.60    8.00 
 -11   1  10   42.20    9.70 
   9  -1 -10   38.00    7.30 
  -9  -1  10   17.40    6.40 
  -9  -1  10   33.30    8.80 
   9   1 -10   49.30    7.90 
  -9   1  10   29.60    6.50 
  -9   1  10   53.19    9.00 
  -7  -1  10   62.49    8.30 
   7  -1 -10   77.19    8.70 
  -7  -1  10   55.59    8.90 
  -7   1  10   77.49    9.50 
  -7   1  10   56.89    8.10 
  -7   1  10   89.49    9.60 
   7   1 -10   64.79    8.80 
   5  -1 -10  115.39   11.40 
  -5   1  10  111.19   13.10 
   5   1 -10   92.69   11.70 
  -3  -1  10   69.19    9.10 
  -3   1  10   91.39   11.90 
   3   1 -10   71.09    8.00 
  -1  -1  10  208.98   16.20 
  -1   1  10  180.48   16.50 
   1   1 -10  188.58   14.60 
   1  -1  10   36.40    6.90 
   1  -1  10   36.60    5.40 
   1   1  10   43.80    7.70 
   3  -1  10  189.38   16.60 
   3  -1  10  186.68   14.10 
   3   1  10  173.68   17.00 
   5  -1  10   15.40    5.60 
   5  -1  10   12.90    6.50 
   5   1  10    6.50    5.90 
   7  -1  10  131.29   14.40 
   7  -1  10  132.09   15.40 
   7   1  10  123.19   15.30 
   9  -1  10    3.60    7.60 
   9   1  10    9.20    6.70 
   9   1  10   13.00    7.10 
  11  -1  10   35.10   10.80 
 -11   1 -10   74.19   12.00 
  11   1  10   31.70    9.50 
  13  -1  10    9.30    9.50 
  13   1  10    0.40    7.90 
 -16  -2  10    9.20    9.60 
  16  -2 -10    0.60    7.60 
  16   2 -10    0.80    7.40 
 -16   2  10    4.80    9.30 
  14  -2 -10   62.49   10.50 
 -14  -2  10   66.39   12.10 
 -14   2  10   54.79   11.50 
  14   2 -10   62.29   10.10 
 -12  -2  10    5.70    8.30 
  12  -2 -10   -0.70    5.90 
 -12   2  10    2.00    8.20 
  12   2 -10    5.10    6.80 
 -12   2  10    4.80    8.60 
 -10  -2  10  116.19   15.80 
  10  -2 -10  141.29   14.60 
 -10  -2  10  141.89   18.60 
  10   2 -10  196.38   21.60 
 -10   2  10  146.89   16.90 
   8  -2 -10    4.80    5.30 
  -8  -2  10    4.10    5.10 
  -8  -2  10   12.10    7.10 
  -8   2  10    2.80    6.70 
   8   2 -10    5.60    5.70 
  -8   2  10   -4.30    6.60 
  -6  -2  10  298.27   20.50 
   6  -2 -10  260.37   20.30 
  -6   2  10  282.87   21.70 
   6   2 -10  268.37   20.80 
  -6   2  10  279.87   21.00 
  -4   2  10    6.00    6.10 
   4   2 -10    2.20    4.70 
  -2   2  10  339.97   25.50 
   2   2 -10  351.36   23.70 
   0  -2  10    1.70    4.80 
   0   2  10   -3.00    5.30 
   2  -2  10  286.57   21.20 
   2  -2  10  284.17   19.40 
   2   2  10  250.57   21.60 
   4  -2  10    4.70    6.00 
   4  -2  10    6.70    5.10 
   4   2  10    0.40    6.10 
   6  -2  10  140.89   14.40 
   8  -2  10    6.00    7.10 
   8   2  10    1.30    6.40 
  10  -2  10   50.59   10.80 
  10   2  10   43.80    9.70 
 -10   2 -10   67.89   11.30 
  10   2  10   44.70    9.00 
  12  -2  10    7.40    9.20 
 -12   2 -10    4.50    9.20 
  12   2  10  -10.30    7.10 
  15  -3 -10   23.40    8.00 
 -15  -3  10   19.20   10.10 
 -15   3  10   18.00    9.60 
  15   3 -10   32.30    8.80 
 -15   3  10   -6.40   13.10 
  13  -3 -10   -2.90    6.70 
 -13  -3  10    9.60    9.30 
 -13   3  10   11.60    9.20 
 -13   3  10   11.60    9.20 
  13   3 -10   10.30    7.10 
  11  -3 -10   64.59    9.10 
 -11  -3  10   45.10   10.30 
 -11  -3  10   47.60    8.30 
 -11   3  10   58.49   10.50 
  11   3 -10   51.49    8.90 
 -11   3  10   28.70    9.80 
  -9  -3  10   30.50    6.70 
   9  -3 -10   36.90    7.40 
  -9   3  10   31.90    8.70 
   9   3 -10   31.40    7.30 
  -9   3  10   33.60    8.60 
  -7  -3  10  109.09   13.60 
   7  -3 -10  108.99   11.60 
  -7  -3  10   78.79   10.90 
   7   3 -10   89.09   10.60 
  -7   3  10  100.29   13.00 
  -7   3  10  101.29   11.50 
   5   3 -10  109.39   11.40 
  -5   3  10   82.19   11.90 
  -5   3  10  101.49   11.50 
  -3   3  10  120.89   12.40 
   3   3 -10  100.69   11.20 
  -1  -3  10  185.68   14.60 
  -1   3  10  155.98   16.80 
   1  -3  10   76.99    9.20 
   1  -3  10   76.59    8.20 
   1   3  10   70.69    9.80 
   3  -3  10  215.68   16.50 
   3   3  10  214.18   19.20 
   5  -3  10   16.80    6.20 
   5   3  10   13.70    7.30 
   7  -3  10  151.28   15.80 
  -7   3 -10  149.29   18.40 
   7   3  10  145.49   16.60 
   9  -3  10    9.10    7.80 
   9   3  10   12.20    7.40 
  -9   3 -10   -4.40    8.30 
  11  -3  10   60.79   11.90 
 -11   3 -10   82.79   12.60 
  11   3  10   75.99   10.90 
  13  -3  10   -1.80    9.60 
  13   3  10   -3.50    7.00 
 -13   3 -10   -5.20    8.40 
 -16  -4  10   10.20    9.70 
  16  -4 -10    3.80    7.60 
 -16   4  10    5.10    9.40 
  16   4 -10   -0.20    7.40 
 -16   4  10   11.00    8.80 
 -14  -4  10   28.50   10.20 
  14  -4 -10   25.20    8.50 
  14   4 -10   41.40    8.80 
 -14   4  10   18.30   10.60 
 -14   4  10   40.10   10.20 
  12  -4 -10    2.90    6.70 
 -12  -4  10   16.90    8.70 
  12   4 -10    1.70    6.50 
 -12   4  10   19.00    8.90 
 -12   4  10    4.10    9.70 
  10  -4 -10  138.59   15.10 
 -10  -4  10  141.29   17.00 
 -10  -4  10  157.58   15.10 
 -10   4  10  141.59   19.00 
 -10   4  10  124.99   17.30 
  10   4 -10  151.78   15.70 
   8  -4 -10   10.60    5.50 
  -8  -4  10  -10.20    6.80 
  -8  -4  10   12.80    5.40 
  -8   4  10    2.80    7.10 
  -8   4  10    9.90    7.90 
   8   4 -10    3.00    5.60 
   6   4 -10  280.67   22.00 
  -6   4  10  298.77   22.40 
  -6   4  10  299.07   23.40 
  -4   4  10    3.40    5.40 
  -4   4  10    0.30    6.40 
   4   4 -10    0.90    4.60 
  -2   4  10  435.96   28.60 
   2   4 -10  453.85   29.10 
  -2   4  10  406.86   31.00 
   0  -4  10    5.90    4.50 
   0   4  10    1.80    6.40 
   2  -4  10  401.46   27.00 
   2   4  10  395.76   29.20 
   4  -4  10    8.60    5.80 
   4   4  10   12.50    6.90 
  -4   4 -10   23.50    8.20 
   6  -4  10  239.28   20.20 
   6   4  10  252.27   21.70 
   8  -4  10    1.80    7.80 
   8   4  10   24.10    8.00 
  -8   4 -10   19.20    8.90 
  10  -4  10   77.19   12.60 
 -10   4 -10   88.59   12.70 
  10   4  10  102.49   12.80 
  12  -4  10   11.70    9.50 
  12   4  10    0.50    7.30 
 -12   4 -10   12.10    9.40 
 -15  -5  10   27.50   10.30 
  15  -5 -10   17.20    8.20 
  15   5 -10   33.30    8.90 
 -15   5  10   30.10   10.40 
 -15   5  10   22.30    9.90 
  13  -5 -10    7.00    7.10 
 -13  -5  10   16.30    9.20 
 -13   5  10   24.80    9.60 
 -13   5  10   29.50   11.20 
  13   5 -10   12.00    7.20 
 -11  -5  10   32.60    9.10 
  11  -5 -10   65.19    9.00 
 -11  -5  10   49.00   10.50 
 -11   5  10   64.29   12.60 
  11   5 -10   54.39    9.30 
 -11   5  10   68.39   10.70 
   9  -5 -10   48.40    7.90 
  -9  -5  10   51.59   10.00 
  -9  -5  10   32.70    7.50 
  -9   5  10   35.40   14.60 
  -9   5  10   68.09   11.30 
   9   5 -10   53.09    8.80 
  -7  -5  10   91.89   11.50 
  -7  -5  10   76.69   11.30 
   7   5 -10   74.79   10.20 
  -7   5  10  126.19   15.70 
  -7   5  10  118.99   14.20 
  -5   5  10  112.19   13.50 
  -5   5  10  127.79   13.40 
   5   5 -10  122.59   12.80 
  -3   5  10  102.39   11.50 
  -3   5  10   89.99   11.30 
   3   5 -10   85.69   10.90 
  -1   5  10  181.88   17.30 
  -1   5  10  162.28   13.60 
   1   5 -10  144.79   14.80 
   1  -5  10   60.39    7.60 
  -1   5 -10   44.50    8.10 
   1   5  10   53.89    9.60 
   3  -5  10  194.08   16.20 
   3   5  10  195.88   18.80 
  -3   5 -10  204.58   18.40 
   5  -5  10    4.30    6.20 
   5   5  10   21.40    7.90 
  -5   5 -10   17.50    8.10 
   7  -5  10  122.49   14.00 
   7   5  10  147.39   17.20 
  -7   5 -10  140.99   17.30 
   9  -5  10   14.30    8.40 
  -9   5 -10    0.60    8.20 
   9   5  10    4.10    7.10 
  11  -5  10   36.70   10.90 
  11   5  10   80.79   11.30 
 -11   5 -10   63.79   11.50 
  14  -6 -10   54.19   10.00 
 -14  -6  10   47.60   11.10 
 -14   6  10   39.00   11.20 
  14   6 -10   47.10    9.50 
 -14   6  10   38.40   10.50 
 -12  -6  10    6.50    8.70 
  12  -6 -10   19.90    7.40 
 -12   6  10    7.70   10.90 
  12   6 -10   14.00    7.40 
 -12   6  10    9.90    8.90 
 -10  -6  10  141.69   15.70 
 -10  -6  10  160.08   18.40 
  10   6 -10  162.18   16.70 
 -10   6  10  162.98   17.70 
 -10   6  10  159.48   19.60 
  -8  -6  10   21.30    6.10 
  -8  -6  10   27.40    8.70 
  -8   6  10    4.00   12.90 
  -8   6  10   29.80    9.60 
   8   6 -10   31.20    7.50 
  -6   6  10  247.48   23.10 
   6   6 -10  286.67   21.70 
  -6   6  10  278.57   21.80 
  -4   6  10   24.70    6.90 
   4   6 -10   26.10    6.50 
  -4   6  10   28.20    8.20 
  -2   6  10  335.57   23.40 
  -2   6  10  311.47   25.20 
   0  -6  10   25.60    5.70 
   0   6  10   22.20    7.50 
   0   6 -10   25.40    6.30 
   0   6  10   15.60    5.60 
   2  -6  10  259.97   19.60 
   2   6  10  238.78   19.40 
  -2   6 -10  278.57   20.80 
   2   6  10  255.97   22.20 
   4   6  10   18.30    8.00 
  -4   6 -10    8.50    7.30 
   6  -6  10  132.79   15.90 
  -6   6 -10  156.78   17.90 
   6   6  10  150.68   17.80 
   8  -6  10    5.10    8.20 
  -8   6 -10    9.90    8.40 
   8   6  10   17.00    8.10 
  10  -6  10   45.10   11.00 
  10   6  10   62.09   10.50 
 -10   6 -10   49.10   10.50 
 -12   6 -10   17.40    9.40 
  12   6  10    3.30    8.50 
  15  -7 -10   22.70    8.50 
 -15   7  10   11.50    9.00 
  15   7 -10   11.90    7.60 
 -15   7  10   -8.70    8.60 
  13  -7 -10   15.00    7.70 
 -13  -7  10   20.30    9.80 
  13   7 -10   15.90    7.80 
 -13   7  10   11.80    9.00 
 -13   7  10   14.80   10.80 
 -11  -7  10   71.59   11.80 
  11  -7 -10   57.09    8.80 
 -11   7  10   29.40   12.20 
  11   7 -10   70.49   10.10 
 -11   7  10   47.10   10.40 
  -9  -7  10   68.49   11.40 
  -9  -7  10   49.90    8.50 
   9   7 -10   54.89    9.20 
  -9   7  10   63.09   11.90 
  -9   7  10   60.29   10.50 
  -7  -7  10  109.99   12.90 
  -7  -7  10  105.89   12.00 
  -7   7  10   87.69   12.10 
   7   7 -10   94.59   11.30 
   5   7 -10  152.18   16.10 
  -5   7  10  123.69   15.60 
  -5   7  10  137.89   17.10 
   3   7 -10  148.89   13.80 
  -3   7  10  141.29   17.00 
  -3   7  10  146.79   14.80 
  -1   7  10  216.58   17.60 
  -1   7  10  229.18   20.60 
   1  -7  10  130.89   13.40 
  -1   7 -10  124.99   14.00 
   3  -7  10  243.58   18.40 
   3   7  10  246.38   21.50 
   3   7  10  224.28   18.70 
  -3   7 -10  213.38   19.80 
   5  -7  10   64.09    9.50 
   5   7  10   61.69    9.20 
   5   7  10   93.59   12.00 
   7  -7  10  136.39   16.70 
  -7   7 -10  171.08   18.50 
   7   7  10  163.28   18.30 
   7   7  10  141.39   15.30 
   9  -7  10   12.90    8.60 
  -9   7 -10   16.00    9.00 
   9   7  10   25.40    8.40 
  11  -7  10   54.69   12.70 
 -11   7 -10   83.29   14.60 
  11   7  10   91.39   13.70 
 -14  -8  10   43.70   12.90 
  14  -8 -10   28.10    8.20 
 -14   8  10   31.20   10.70 
 -14   8  10    3.00    8.90 
  14   8 -10   37.30    8.50 
 -12  -8  10    3.10    8.70 
  12  -8 -10   12.20    6.80 
 -12   8  10    5.90    8.70 
 -12   8  10   25.30   11.60 
  12   8 -10    6.80    6.80 
 -10  -8  10   97.59   13.40 
 -10   8  10   82.89   14.30 
  10   8 -10   88.39   11.10 
 -10   8  10   82.49   11.90 
  -8  -8  10    6.40    6.10 
  -8   8  10   16.10   10.00 
  -8   8  10   16.30    8.40 
   8   8 -10   16.40    6.80 
  -6  -8  10  176.68   15.80 
   6   8 -10  193.68   17.30 
  -6   8  10  236.78   18.90 
  -6   8  10  174.58   20.50 
   4   8 -10   16.30    6.10 
  -4   8  10   15.30    7.70 
  -4   8  10   13.00    8.60 
  -2   8  10  287.07   24.50 
  -2   8  10  320.17   24.80 
   0  -8  10   38.60    6.90 
   0   8  10   33.40    9.30 
   0   8  10   35.30    7.20 
   2  -8  10  241.88   20.00 
   2   8  10  277.57   23.20 
   2   8  10  243.88   20.10 
  -2   8 -10  275.87   21.00 
   4  -8  10   28.60    7.20 
  -4   8 -10   30.20    8.70 
   4   8  10   34.80    7.40 
   4   8  10   41.70    9.80 
   6  -8  10  134.69   15.60 
   6   8  10  146.39   17.50 
   6   8  10  150.68   14.80 
  -6   8 -10  124.89   14.40 
   8  -8  10   22.10    9.00 
   8   8  10   20.70    7.20 
  -8   8 -10   18.10    9.40 
   8   8  10   38.20    9.50 
  10  -8  10   36.30   10.70 
  10   8  10   85.59   11.50 
  10   8  10   64.09   10.90 
 -10   8 -10   46.00   10.90 
 -13  -9  10   14.10   11.80 
  13  -9 -10   17.40    6.90 
  13   9 -10   34.50    9.60 
 -13   9  10   14.00   10.90 
 -13   9  10   11.00    9.00 
 -11  -9  10   52.89   11.60 
 -11   9  10   37.80    9.90 
 -11   9  10   45.30   12.60 
  11   9 -10   55.39    9.40 
   9   9 -10   42.10    8.40 
  -9   9  10   34.50    9.70 
  -9   9  10   41.90   12.10 
  -7  -9  10   84.79   11.10 
  -7   9  10   82.39   12.60 
  -7   9  10   50.09   10.20 
   7   9 -10   66.09    9.70 
  -5   9  10   79.29   12.10 
  -5   9  10   69.19   10.70 
   5   9 -10   85.89   10.10 
  -3   9  10   81.19   11.50 
  -3   9  10   64.09   10.00 
   3   9 -10   78.99    9.60 
  -1   9  10  131.69   16.40 
  -1   9  10  108.09   13.50 
   1  -9  10   57.99    8.30 
   1   9  10   65.09    8.80 
  -1   9 -10   44.30    7.70 
   1   9  10   47.60    9.90 
   3  -9  10  156.68   15.20 
   3   9  10  170.08   18.60 
   3   9  10  130.29   15.30 
  -3   9 -10  159.48   16.20 
   5  -9  10   30.90    7.70 
   5   9  10   30.30    7.30 
   5   9  10   29.70    9.20 
  -5   9 -10   23.40    8.40 
   7  -9  10   96.79   11.90 
   7   9  10   92.19   11.40 
  -7   9 -10   79.19   12.00 
   7   9  10   95.79   12.80 
   9  -9  10    9.90    8.60 
   9   9  10    5.50    6.80 
   9   9  10    1.00    7.60 
  -9   9 -10    9.90    8.90 
  12  10 -10   13.70    8.60 
 -12  10  10    8.90   11.00 
 -12  10  10   -2.20    8.30 
  10  10 -10   78.39   11.00 
 -10  10  10   81.99   12.20 
 -10  10  10   88.59   14.30 
  -8  10  10   20.10   10.80 
  -8  10  10   17.30    8.80 
   8  10 -10   30.00    7.60 
  -6  10  10  193.78   18.70 
   6  10 -10  172.68   16.60 
  -6  10  10  163.88   20.80 
   4  10 -10   21.30    6.80 
  -4  10  10   17.80    8.10 
  -4  10  10   39.70    9.90 
  -2  10  10  197.68   18.80 
  -2  10  10  240.38   21.30 
   2  10 -10  210.38   18.00 
   0  10  10   32.20    9.20 
   0  10  10   16.20    6.70 
   2 -10  10  163.08   15.80 
  -2  10 -10  176.38   15.80 
   2  10  10  152.68   16.00 
   2  10  10  167.68   19.10 
   4 -10  10   20.00    7.20 
  -4  10 -10   20.10    7.70 
   4  10  10   24.70    7.30 
   4  10  10   21.30    9.30 
   6 -10  10   94.69   11.30 
  -6  10 -10   77.49   11.40 
   6  10  10  107.99   13.40 
   6  10  10  100.69   13.80 
   8 -10  10   16.10    8.40 
   8  10  10   12.50    7.10 
  -8  10 -10    3.00    8.20 
   8  10  10    7.60    8.00 
  11  11 -10   34.90    8.60 
 -11  11  10    9.10    8.60 
  -9  11  10   14.30   10.70 
   9  11 -10   17.70    7.70 
  -9  11  10   13.70    8.80 
  -7  11  10   54.89   11.90 
  -7  11  10   33.80    9.70 
   7  11 -10   69.29    9.40 
   5  11 -10   80.39   10.10 
  -5  11  10   56.99   11.60 
  -5  11  10   48.90   10.20 
  -3  11  10   47.40    9.80 
   3  11 -10   76.89    9.60 
  -3  11  10   56.89   11.10 
  -1  11  10  106.19   12.80 
  -1  11  10   77.59   10.90 
   1 -11  10   52.09    8.70 
   1  11  10   63.49   11.30 
  -1  11 -10   65.39    8.00 
   1  11  10   62.39    9.50 
   3 -11  10   98.49   11.50 
   3  11  10  121.69   14.10 
  -3  11 -10  120.59   13.80 
   3  11  10   91.99   11.80 
   5 -11  10   52.59    8.70 
   5  11  10   23.60    7.50 
  -5  11 -10   50.99    8.80 
   5  11  10   42.40   10.10 
   7  11  10   73.29   11.60 
  -7  11 -10   42.10    9.70 
   7  11  10   66.69   10.10 
 -10  12  10   42.80   12.20 
  10  12 -10   48.40    9.20 
 -10  12  10   19.50    9.10 
   8  12 -10   11.30    6.80 
  -8  12  10    1.00   10.40 
  -8  12  10    1.20    7.80 
  -6  12  10   44.00   10.40 
   6  12 -10   71.29    9.90 
  -6  12  10   78.29   12.90 
   4  12 -10   21.90    7.60 
  -4  12  10   -0.80    9.30 
  -4  12  10   19.60    8.50 
  -2  12  10  112.59   13.40 
  -2  12  10   63.69   10.80 
   2  12 -10   78.29   10.40 
   0  12  10   26.10    9.70 
   0  12  10    6.50    6.90 
   2 -12  10   66.09   10.20 
   2  12  10  105.09   13.40 
  -2  12 -10  104.29   12.80 
   2  12  10   80.99   11.30 
   4 -12  10   18.30    7.70 
   4  12  10   21.70    9.80 
   4  12  10   19.50    7.20 
  -4  12 -10   13.40    7.20 
   6 -12  10   45.10    9.10 
   6  12  10   53.19   16.20 
  -6  12 -10   40.30    8.70 
  -7  13  10   15.50   11.80 
  -7  13  10   28.20    9.30 
   7  13 -10   32.40   12.20 
  -5  13  10   30.00   10.50 
   5  13 -10   29.60    8.00 
  -5  13  10   14.40    8.80 
  -3  13  10   25.20    8.60 
  -3  13  10   36.50   10.70 
   3  13 -10   32.10    8.20 
   1  13 -10   34.30    8.10 
  -1  13  10   17.40    7.70 
  -1  13  10   46.00   10.50 
   1  13  10   29.90    9.80 
   1  13  10   10.50    7.20 
  -3  13 -10   31.00    7.90 
   3  13  10   37.80    8.40 
   5 -13  10   12.30    7.70 
  -5  13 -10    5.50    6.90 
   5  13  10   18.00    7.30 
   5  13  10    7.10    8.50 
  -4  14  10    5.00    7.50 
  -4  14  10   17.20   10.10 
   4  14 -10   14.40    7.50 
  -2  14  10   65.39   12.10 
   2  14 -10   50.19   10.20 
  -2  14  10   47.00   10.00 
   0  14  10   -0.30    8.80 
   0  14  10    7.20    7.10 
   2  14  10   55.29   11.30 
  16   0 -11   -3.60    8.10 
 -16   0  11    4.60    9.30 
 -14   0  11   -0.60    9.20 
  14   0 -11   -1.40    6.50 
  12   0 -11   -1.80    6.40 
 -12   0  11    5.60    8.90 
 -10   0  11    7.40    5.50 
  10   0 -11    2.30    6.30 
 -10   0  11    1.20    7.90 
  -8   0  11   -6.50    8.50 
   8   0 -11   -8.70    4.60 
  -8   0  11    8.10    5.00 
   6   0 -11   -5.40    4.60 
   4   0 -11   -4.40    4.30 
  -4   0  11    2.30    4.80 
  -2   0  11    0.40    4.90 
   2   0 -11   -3.90    3.80 
   0   0  11    3.20    5.50 
   2   0  11   -2.30    5.30 
   4   0  11    3.20    5.90 
   4   0  11    4.60    4.30 
   6   0  11    2.40    6.30 
   6   0  11    2.40    5.20 
   8   0  11  -10.40    6.10 
   8   0  11   -2.10    6.10 
  10   0  11   -0.10    7.20 
  12   0  11    0.70    7.70 
 -15  -1  11  -11.20    9.00 
  15  -1 -11    1.80    6.90 
  15   1 -11   13.00    8.00 
 -15   1  11    6.90    9.40 
  13  -1 -11    2.20    6.50 
 -13  -1  11    9.30    9.00 
  13   1 -11   12.80    7.00 
 -13   1  11   12.20    9.30 
 -11  -1  11    9.80    8.70 
  11  -1 -11   23.50    7.20 
 -11   1  11   30.00    6.80 
  11   1 -11   27.20    7.30 
 -11   1  11   22.20    9.00 
  -9  -1  11   22.30    8.40 
  -9  -1  11   23.80    6.40 
   9  -1 -11   30.90    6.80 
  -9   1  11   27.70    6.20 
  -9   1  11   26.60    8.60 
   9   1 -11   33.70    7.30 
   7  -1 -11   58.99    8.10 
  -7   1  11   49.80    7.50 
  -7   1  11   66.19    8.90 
  -7   1  11   56.19    8.50 
   7   1 -11   54.89    8.40 
   5  -1 -11   65.19    8.10 
  -5   1  11   71.99    9.20 
   5   1 -11   64.49    8.40 
  -3  -1  11   99.79    9.70 
   3   1 -11   80.79    9.90 
  -3   1  11   87.69   10.50 
  -1  -1  11   95.39   10.20 
  -1   1  11   85.89   10.30 
   1   1 -11   79.49    8.50 
   1  -1  11   91.49   10.50 
   1   1  11   93.39   11.30 
   3  -1  11   60.79    7.30 
   3  -1  11   57.79    8.90 
   3   1  11   60.89    9.50 
   5  -1  11   61.79    8.10 
   5  -1  11   50.09    9.40 
   7  -1  11   18.70    7.40 
   7  -1  11   22.80    7.50 
   7   1  11   25.20    7.90 
   9  -1  11   22.00    8.50 
   9   1  11   17.90    7.50 
   9   1  11   18.10    7.30 
  11  -1  11   19.40    8.50 
 -11   1 -11   -3.80    9.60 
  11   1  11    6.60    7.20 
 -16  -2  11    4.80   10.20 
  16  -2 -11    8.40    7.90 
 -16   2  11  -18.50    8.80 
  16   2 -11   10.30    8.80 
 -14  -2  11   -1.90    9.20 
  14  -2 -11    5.00    7.00 
  14   2 -11    7.40    7.20 
 -12  -2  11   11.90    8.90 
  12  -2 -11    3.50    6.40 
 -12   2  11   -3.90    8.50 
  12   2 -11    4.70    6.70 
  10  -2 -11   14.40    5.80 
 -10  -2  11    0.20    5.30 
 -10  -2  11    5.70    8.40 
 -10   2  11    7.00    7.40 
 -10   2  11    6.00    5.60 
 -10   2  11   -9.00    7.40 
  10   2 -11    4.50    6.00 
  -8  -2  11   -1.80    9.30 
  -8  -2  11   -1.80    4.90 
   8  -2 -11    0.80    4.90 
  -8   2  11   11.30    7.00 
   8   2 -11   -3.90    5.30 
  -8   2  11    0.10    4.60 
   6  -2 -11   17.50    5.10 
   6   2 -11    4.80    5.10 
  -6   2  11   17.10    7.10 
   4   2 -11    0.70    4.40 
  -4   2  11   -0.90    5.80 
  -2  -2  11    4.30    4.70 
   2   2 -11   11.00    4.70 
  -2   2  11    9.70    6.60 
   0  -2  11    2.40    5.10 
   0   2  11    0.40    5.80 
   2  -2  11    7.20    5.80 
   2  -2  11    2.00    4.20 
   2   2  11   -2.60    6.00 
   4  -2  11    2.50    5.80 
   4  -2  11    5.70    5.00 
   4   2  11    5.60    6.40 
   6  -2  11    3.80    5.90 
   6   2  11    3.40    6.60 
   8  -2  11    7.80    7.70 
   8   2  11   -9.40    6.00 
  10  -2  11    9.80    8.30 
 -10   2 -11   -9.50    8.10 
  10   2  11   12.80    7.30 
 -12   2 -11    0.10   10.70 
  12   2  11  -12.70    6.50 
 -15  -3  11    5.20    9.80 
  15  -3 -11   -5.30    6.80 
  15   3 -11    5.90    7.20 
 -15   3  11    6.20    9.10 
 -15   3  11  -23.30    8.80 
  13  -3 -11    9.10    7.00 
 -13  -3  11    7.50    9.10 
 -13   3  11   -7.30    8.40 
  13   3 -11    7.50    6.90 
 -13   3  11   -9.70    8.20 
  11  -3 -11    7.60   10.40 
 -11  -3  11   16.30    6.40 
 -11  -3  11    4.20    8.50 
 -11   3  11   -6.10    8.30 
  11   3 -11   11.40    6.80 
 -11   3  11   12.60    8.50 
  -9  -3  11   -0.60    5.00 
   9  -3 -11    2.00    5.20 
  -9  -3  11   -5.40    7.50 
  -9   3  11    5.80    7.70 
   9   3 -11    2.80    5.90 
  -9   3  11   13.80    7.80 
   7   3 -11   29.00    7.10 
  -7   3  11   21.20    7.60 
  -7   3  11   21.60    8.30 
  -5   3  11   -6.50    6.50 
  -5   3  11    1.90    5.70 
   5   3 -11    5.00    5.10 
  -3   3  11   44.10    8.50 
   3   3 -11   45.90    7.00 
  -1  -3  11    9.60    5.10 
  -1   3  11   10.90    7.00 
   1  -3  11   49.40    7.70 
   1  -3  11   44.80    6.80 
   1   3  11   46.80    9.00 
   3  -3  11    4.60    4.90 
   3   3  11   -4.10    6.40 
   5  -3  11   17.40    6.20 
   5   3  11   27.50    8.30 
   7  -3  11   -7.40    7.00 
   7   3  11    5.50    7.00 
  -7   3 -11    2.50    8.60 
   9  -3  11    8.80    8.50 
  -9   3 -11   11.40    9.00 
   9   3  11    4.60    7.00 
  11  -3  11    9.30    8.40 
 -11   3 -11   -6.50    8.70 
  11   3  11   -2.10    6.90 
  16  -4 -11    3.60    7.60 
  16   4 -11    3.60    7.10 
  14  -4 -11    2.50    7.10 
 -14  -4  11    6.10    9.60 
  14   4 -11    6.20    7.00 
 -14   4  11   11.20    9.40 
 -14   4  11   -0.10    9.30 
  12  -4 -11    9.70    6.80 
 -12  -4  11   17.50    9.30 
 -12   4  11   -2.30    8.90 
  12   4 -11   -1.20    6.60 
 -12   4  11   -6.60    8.60 
  10  -4 -11   20.70    6.80 
 -10  -4  11    9.20    8.90 
 -10   4  11   12.80    8.80 
  10   4 -11   23.20    7.40 
 -10   4  11   30.60    9.20 
  -8  -4  11   17.40    8.20 
   8   4 -11   30.80    7.40 
  -8   4  11   27.20    8.60 
  -8   4  11   18.40    7.70 
  -6   4  11   35.70    8.80 
  -6   4  11   33.10    7.90 
   6   4 -11   33.50    7.10 
   4   4 -11   43.10    7.10 
  -4   4  11   31.60    6.60 
  -4   4  11   49.40    8.90 
  -2   4  11   41.00    8.60 
   2   4 -11   43.40    6.70 
   0   4  11   56.99    9.80 
   2  -4  11   40.30    6.70 
   2   4  11   38.80    8.80 
   4  -4  11   28.50    6.80 
   4   4  11   44.20    9.10 
  -4   4 -11   28.00    9.10 
   6  -4  11   34.50    7.80 
   6   4  11   18.30    8.20 
  -6   4 -11   22.70    8.90 
   8  -4  11    7.40    7.70 
  -8   4 -11   11.30    8.90 
   8   4  11   15.20    7.80 
  10  -4  11    4.60    8.20 
  10   4  11   10.00    7.70 
 -10   4 -11    9.00    8.90 
  12  -4  11   -3.00    9.50 
  12   4  11    0.20    7.40 
 -12   4 -11    4.60    9.10 
 -15  -5  11   19.80   12.10 
  15  -5 -11    2.30    6.80 
 -15   5  11   22.80    9.60 
 -15   5  11    8.80    9.30 
  15   5 -11    4.50    7.40 
  13  -5 -11   18.60    7.40 
 -13  -5  11   10.90    9.40 
 -13   5  11  -10.90    8.70 
  13   5 -11   21.70    7.60 
 -13   5  11   17.80    9.20 
 -11  -5  11    3.60    7.80 
 -11  -5  11   24.30    9.30 
  11  -5 -11   16.40    6.90 
 -11   5  11   25.20   12.40 
 -11   5  11    7.10    8.40 
  11   5 -11   10.80    7.00 
  -9  -5  11   35.40    9.30 
  -9  -5  11   37.60    7.80 
   9   5 -11   57.29    8.80 
  -9   5  11   57.59   11.00 
  -9   5  11   35.60    9.30 
  -7   5  11   26.10    8.30 
   7   5 -11   35.20    7.60 
  -7   5  11   40.20    9.50 
  -5   5  11   59.59   12.90 
   5   5 -11   93.99   10.20 
  -5   5  11   78.19   11.30 
  -3   5  11   79.19   10.50 
   3   5 -11   73.59    9.10 
  -3   5  11   81.39   11.40 
   1   5 -11   99.79   12.70 
  -1   5  11  130.79   15.70 
   1  -5  11   50.79    7.40 
   1   5  11   54.69   10.10 
  -1   5 -11   59.89    9.10 
   3  -5  11   95.79   11.60 
  -3   5 -11   96.49   11.60 
   3   5  11   95.99   12.40 
   5  -5  11   37.00    8.00 
   5   5  11   32.90    9.30 
  -5   5 -11   25.70    9.60 
   7  -5  11   55.99   10.20 
  -7   5 -11   47.30   10.30 
   7   5  11   57.09   10.90 
   9  -5  11   13.10    8.40 
   9   5  11   15.90    8.10 
  -9   5 -11    7.50    8.40 
  11  -5  11   18.00    9.70 
 -11   5 -11   28.70   11.50 
  14  -6 -11   -1.60    6.70 
 -14  -6  11    8.80    9.30 
 -14   6  11  -11.90    8.20 
  14   6 -11   -7.00   13.10 
 -14   6  11   -5.70    8.90 
 -12  -6  11    8.10    8.80 
  12  -6 -11    6.50    6.30 
 -12   6  11    9.90    8.70 
  12   6 -11    9.00    6.90 
 -12   6  11  -13.00    9.40 
 -10  -6  11    5.70    6.40 
 -10  -6  11   -0.60    8.20 
 -10   6  11   11.90    8.60 
 -10   6  11   14.10   10.00 
  10   6 -11    2.10    6.40 
  -8  -6  11   13.10    5.70 
  -8  -6  11    0.50    7.50 
   8   6 -11    0.70    6.00 
  -8   6  11   -3.80    7.40 
  -6   6  11   10.30    7.30 
  -6   6  11    9.80    8.30 
   6   6 -11    9.70    5.90 
  -4   6  11    0.80    7.00 
  -4   6  11    9.30    7.70 
   2   6 -11   12.00    5.60 
  -2   6  11   14.00    8.00 
   0  -6  11    2.30    5.00 
   0   6 -11    5.50    5.70 
   0   6  11    2.20    4.80 
   2   6  11   10.20    7.90 
  -2   6 -11    6.00    6.40 
   4  -6  11   18.30    6.40 
  -4   6 -11    0.70    7.10 
   4   6  11    6.90    7.40 
   6  -6  11   -2.80    6.60 
  -6   6 -11    5.00    7.80 
   6   6  11   -2.20    7.40 
   8  -6  11    1.30    7.70 
   8   6  11    8.80    7.80 
  -8   6 -11   -2.80    7.80 
  10  -6  11  -13.30    7.90 
 -10   6 -11    6.50    8.50 
  10   6  11   11.40    7.70 
 -13  -7  11   15.90    9.70 
  13  -7 -11   -3.90    6.40 
 -13   7  11   14.80    9.40 
 -13   7  11   -0.10    9.60 
  13   7 -11   -0.50    6.60 
 -11  -7  11  -14.50    8.00 
 -11   7  11   11.80    9.00 
 -11   7  11    6.80   10.20 
  11   7 -11    9.40    6.70 
  -9  -7  11  -12.70    5.70 
  -9  -7  11    2.00    8.30 
  -9   7  11    1.30    7.80 
  -9   7  11    2.90    9.50 
   9   7 -11   -4.40    5.90 
  -7   7  11    6.20    7.70 
   7   7 -11   16.10    6.70 
  -7   7  11   14.90    9.40 
  -5   7  11    5.70    8.30 
  -5   7  11    7.70    6.90 
   5   7 -11   -1.90    5.40 
  -3   7  11   40.00    9.30 
   3   7 -11   20.10    6.50 
  -3   7  11   22.50    7.00 
  -1   7  11   -2.30    5.10 
  -1   7  11   -4.40    7.40 
   1  -7  11   15.80    6.00 
   1   7  11   16.80    6.00 
  -1   7 -11   18.80    6.60 
   1   7  11   19.50    8.50 
   3  -7  11    2.90    5.90 
  -3   7 -11   -9.50    6.40 
   3   7  11    0.60    7.40 
   5  -7  11    6.70    6.60 
   5   7  11   -5.60    7.40 
  -5   7 -11   13.40    7.80 
   7  -7  11    0.30    7.10 
  -7   7 -11    6.80    8.10 
   7   7  11    7.10    8.30 
   9  -7  11   -3.50    8.10 
   9   7  11   -6.50    7.00 
  -9   7 -11    7.40    8.80 
 -12  -8  11    1.00    8.80 
 -12   8  11    2.80    9.80 
 -12   8  11   16.00    9.00 
  12   8 -11    6.10    6.70 
 -10  -8  11    9.60    9.20 
 -10   8  11   12.60    8.90 
  10   8 -11    3.90    6.70 
 -10   8  11   10.30   10.40 
  -8   8  11   -5.00    9.30 
  -8   8  11   11.40    8.10 
   8   8 -11    8.90    6.50 
  -6   8  11   30.80   10.00 
  -6   8  11   10.20    7.70 
   6   8 -11   39.40    7.50 
  -4   8  11   14.70    7.20 
  -4   8  11   23.80    8.80 
   4   8 -11   25.90    7.00 
  -2   8  11   25.10    8.80 
  -2   8  11   32.80    7.00 
   2   8 -11   26.70    6.70 
   0   8  11   34.30    8.80 
   0   8  11   26.00    6.60 
   2  -8  11   10.80    6.40 
  -2   8 -11   21.70    7.20 
   2   8  11   22.10    8.90 
   2   8  11   20.40    6.50 
   4  -8  11   13.70    6.80 
  -4   8 -11    9.60    7.60 
   4   8  11   15.10    8.40 
   6  -8  11    6.90    7.00 
   6   8  11   21.80    8.90 
  -6   8 -11    3.30    8.10 
   6   8  11   12.10    6.60 
   8  -8  11   -3.60    7.30 
   8   8  11   20.00    8.80 
  -8   8 -11    9.50    8.70 
  10  -8  11   16.80    9.10 
  10   8  11    9.00    6.40 
  10   8  11    4.10    7.80 
 -10   8 -11    5.10    8.70 
 -13  -9  11    5.40    9.40 
  13   9 -11    2.10    6.80 
 -11  -9  11   -9.20    8.60 
  11   9 -11    8.90    6.90 
 -11   9  11    0.50   10.20 
 -11   9  11   14.50    8.90 
  -9  -9  11   18.70    9.70 
  -9   9  11   16.40    8.90 
   9   9 -11   26.70    7.70 
  -9   9  11   -2.50   10.20 
  -7  -9  11   31.00   11.50 
  -7   9  11    2.30    7.70 
   7   9 -11    5.20    6.30 
  -7   9  11    7.40    9.90 
  -5   9  11   38.30    8.60 
  -5   9  11   65.79   11.20 
   5   9 -11   36.90    8.10 
  -3   9  11   18.40    8.80 
   3   9 -11    9.40    6.20 
  -3   9  11   12.90    7.00 
  -1   9  11   48.40    8.40 
  -1   9  11   74.89   11.30 
   1  -9  11   13.70    6.30 
  -1   9 -11    7.40    5.70 
   1   9  11    7.80    6.10 
   1   9  11   13.20    8.80 
   3  -9  11   48.90    9.00 
   3   9  11   51.29    8.80 
   3   9  11   83.59   12.00 
   5  -9  11   -5.30    6.40 
   5   9  11   14.90    8.60 
  -5   9 -11   -1.60    7.50 
   5   9  11    2.00    5.80 
   7  -9  11    8.60    7.60 
   7   9  11   30.60    9.40 
  -7   9 -11   24.40    9.00 
   7   9  11   43.60    8.30 
   9  -9  11   -1.20    7.90 
   9   9  11   -8.90    7.40 
   9   9  11   -2.30    5.90 
  -9   9 -11    3.70   10.80 
 -12 -10  11    3.10    9.00 
  12  10 -11  -12.70    6.00 
 -10 -10  11   -3.50    8.80 
 -10  10  11    2.40   10.70 
  10  10 -11   -4.00    6.70 
 -10  10  11   11.00    8.60 
  -8  10  11   -0.50    7.90 
  -8  10  11   -9.30    9.50 
   8  10 -11  -10.30    5.70 
  -6  10  11    6.30    9.30 
   6  10 -11    2.50    6.20 
  -6  10  11   -0.80    7.60 
  -4  10  11    6.20    7.40 
  -4  10  11    2.20    8.90 
   4  10 -11   15.70    6.80 
   2  10 -11   -6.10    5.60 
  -2  10  11    0.90    8.10 
  -2  10  11   -8.20    5.70 
   0  10  11    2.70    5.70 
   0  10  11   -0.60    8.00 
   2 -10  11    6.80    6.30 
   2  10  11    4.90    6.20 
   2  10  11    0.50    8.20 
  -2  10 -11   -1.10    5.90 
   4 -10  11   -9.40    6.00 
   4  10  11   -3.10    5.40 
  -4  10 -11    6.40    6.90 
   4  10  11    8.90    8.50 
   6 -10  11    1.00    6.90 
   6  10  11   -1.90    5.70 
   6  10  11    0.90    7.90 
  -6  10 -11    0.30    7.20 
   8 -10  11   -9.50    6.90 
   8  10  11    1.70    6.30 
   8  10  11   -1.30    8.00 
  -8  10 -11  -10.30    7.60 
  -9  11  11    3.00   10.40 
  -9  11  11   13.00    8.50 
   9  11 -11   -8.00   12.90 
  -7  11  11   12.50   10.60 
  -7  11  11    7.40    7.70 
   7  11 -11    4.70    6.50 
  -5  11  11  -11.10    9.20 
  -5  11  11    4.70    7.60 
   5  11 -11   -8.40    6.20 
  -3  11  11    5.90    6.50 
   3  11 -11    5.00    6.70 
  -3  11  11    9.20    9.00 
  -1  11  11    5.40    8.40 
  -1  11  11    7.40    6.40 
   1  11  11   18.70    9.10 
   1  11  11   11.70    6.70 
   3 -11  11  -10.90    6.00 
   3  11  11   -5.60    5.50 
   3  11  11   -2.00    8.40 
  -3  11 -11   -1.60    6.10 
   5 -11  11    4.80    6.90 
   5  11  11    6.60    6.40 
  -5  11 -11    5.60    7.20 
   5  11  11    6.40    8.60 
   7 -11  11    5.00    7.40 
   7  11  11   -2.60    5.90 
  -7  11 -11   10.50    7.70 
  -8  12  11   -0.60    7.50 
  -8  12  11    8.80   16.00 
   8  12 -11  -11.80    6.00 
  -6  12  11    2.50    7.80 
  -6  12  11    8.90   10.00 
   6  12 -11    5.50    7.10 
   4  12 -11    5.90    6.90 
  -4  12  11    3.00    7.20 
  -4  12  11    6.10    9.40 
  -2  12  11    3.20    6.80 
  -2  12  11   -4.30    8.40 
   2  12 -11    4.40    6.70 
   0  12  11    9.70    9.00 
   0  12  11   -1.90    6.30 
   2 -12  11    1.30    6.40 
  -2  12 -11    3.90    6.00 
   2  12  11   -2.80    5.80 
   2  12  11    8.70    9.10 
   4 -12  11    1.80    6.90 
  -4  12 -11    5.00    6.70 
   4  12  11   17.50   10.30 
   5  13 -11    5.20    7.10 
  -5  13  11    4.30    8.10 
  -5  13  11   12.10   10.50 
  -3  13  11   -4.90   13.80 
  -3  13  11   -0.60    7.00 
   3  13 -11   -3.50    9.60 
  -1  13  11    4.70   14.50 
  -1  13  11    6.00    7.00 
   1  13 -11   16.70   11.90 
   1  13  11   14.10   11.90 
   1  13  11    4.10    8.80 
   3 -13  11   12.50    7.00 
   3  13  11    0.40    6.20 
  -3  13 -11    1.60    6.60 
 -14   0  12   49.60   11.40 
  14   0 -12   58.69    9.50 
  12   0 -12   56.59    9.20 
 -12   0  12   50.89   10.80 
 -10   0  12  193.28   18.70 
  10   0 -12  198.48   16.60 
 -10   0  12  139.59   16.30 
   8   0 -12   90.19   11.70 
  -8   0  12   97.59   12.10 
   6   0 -12  406.56   29.90 
  -6   0  12  471.05   30.10 
  -4   0  12  143.89   13.80 
   4   0 -12  128.99   12.70 
  -2   0  12  821.32   52.89 
   0   0  12  159.38   15.90 
   2   0  12  632.04   42.20 
   4   0  12   73.09   12.20 
   6   0  12  374.46   28.10 
   6   0  12  357.06   25.00 
   8   0  12   29.50    8.40 
   8   0  12   37.30    7.80 
  10   0  12  117.09   14.80 
  15  -1 -12   66.79   10.40 
 -15  -1  12   77.09   13.20 
 -15   1  12   51.79   12.20 
  15   1 -12   81.19   10.80 
  13  -1 -12   37.70    8.40 
 -13  -1  12   51.39   10.80 
 -13   1  12   44.40   11.00 
  13   1 -12   35.10    8.60 
 -11  -1  12  154.28   16.00 
  11  -1 -12  177.88   16.40 
 -11  -1  12  148.39   18.20 
  11   1 -12  172.98   16.50 
 -11   1  12  174.68   18.50 
 -11   1  12  126.39   17.70 
  -9  -1  12   62.59   10.30 
  -9  -1  12   78.79    9.70 
   9  -1 -12   84.19    9.70 
  -9   1  12   72.29   10.30 
  -9   1  12   66.19    9.10 
   7  -1 -12  302.97   22.80 
   7   1 -12  306.07   23.30 
  -7   1  12  336.27   24.00 
   5  -1 -12  153.98   14.60 
  -5   1  12  190.88   17.00 
   5   1 -12  176.88   15.00 
  -3  -1  12  447.26   29.60 
   3   1 -12  396.06   28.80 
  -3   1  12  455.65   30.30 
  -1  -1  12  238.88   19.00 
   1   1 -12  227.08   17.70 
  -1   1  12  260.67   20.10 
   1  -1  12  369.46   26.90 
   1   1  12  381.36   27.80 
   3  -1  12  204.18   16.40 
   3  -1  12  216.48   19.20 
   3   1  12  241.08   19.90 
   5  -1  12  166.48   14.50 
   5  -1  12  201.98   18.20 
   5   1  12  166.08   17.70 
   7  -1  12  158.58   17.20 
   7  -1  12  148.69   14.80 
   7   1  12  144.49   17.30 
   9  -1  12   51.09    9.70 
   9   1  12   72.99   10.80 
  11  -1  12   35.30    9.10 
 -14  -2  12   86.29   13.40 
  14  -2 -12   88.99   11.40 
 -14   2  12   89.49   13.10 
  14   2 -12   99.19   12.10 
 -12  -2  12   64.29   11.80 
  12  -2 -12   69.19    9.80 
 -12   2  12   70.59   11.30 
  12   2 -12   62.89    9.80 
 -10  -2  12  231.98   21.00 
 -10  -2  12  287.07   23.00 
  10  -2 -12  284.07   21.00 
 -10   2  12  249.78   21.00 
  10   2 -12  289.37   21.50 
 -10   2  12  231.38   22.10 
 -10   2  12  285.77   22.70 
   8  -2 -12  132.29   13.00 
  -8   2  12  141.89   15.70 
   8   2 -12  146.39   16.00 
  -8   2  12  107.89   14.70 
  -8   2  12  103.99   12.80 
   6  -2 -12  525.75   36.20 
   6   2 -12  568.04   37.00 
  -6   2  12  568.14   37.80 
  -4   2  12  176.38   17.20 
   4   2 -12  157.48   14.50 
  -2  -2  12  768.72   49.50 
  -2   2  12  796.52   50.79 
   2   2 -12  768.72   49.40 
   0  -2  12  147.89   14.00 
   0   2  12  120.89   15.30 
   2  -2  12  683.83   45.00 
   2  -2  12  654.13   43.30 
   2   2  12  711.03   45.90 
   4  -2  12   66.59    8.20 
   4   2  12   68.29   10.40 
   6  -2  12  325.87   24.10 
   6   2  12  337.77   26.20 
   8  -2  12   22.20    7.90 
   8   2  12   26.90    8.40 
  10  -2  12   96.99   13.00 
 -10   2 -12  113.49   14.60 
  10   2  12  127.99   16.30 
  15  -3 -12   44.30    9.20 
 -15   3  12   55.49   12.00 
 -13  -3  12    3.60    9.70 
  13  -3 -12   24.00    7.90 
  13   3 -12   36.10    8.20 
 -13   3  12   22.20    9.30 
 -13   3  12   37.40   10.20 
 -11  -3  12  134.59   15.50 
  11  -3 -12  150.78   14.90 
 -11  -3  12  135.39   17.70 
 -11   3  12  127.69   14.90 
  11   3 -12  154.98   15.70 
 -11   3  12  143.99   17.60 
   9  -3 -12   74.59    9.20 
  -9  -3  12   60.09   10.80 
  -9   3  12   78.99   11.20 
   9   3 -12   66.09    9.60 
  -9   3  12   63.99   10.50 
   7   3 -12  261.27   22.00 
  -7   3  12  247.38   22.30 
  -7   3  12  264.47   20.90 
  -5   3  12  133.49   16.50 
   5   3 -12  130.69   13.40 
  -3   3  12  365.56   27.90 
   3   3 -12  372.66   25.80 
  -1  -3  12  203.38   16.50 
   1   3 -12  215.78   16.00 
  -1   3  12  159.08   18.40 
   1  -3  12  278.87   21.00 
   1   3  12  259.27   22.80 
   3  -3  12  208.18   16.60 
   3   3  12  203.58   20.00 
   5  -3  12  136.39   13.80 
   5   3  12  147.29   17.30 
   7  -3  12  120.29   14.80 
   7   3  12  139.29   16.50 
  -7   3 -12  137.99   18.00 
   9  -3  12   43.90    9.50 
  -9   3 -12   53.09   11.40 
   9   3  12   60.79   10.70 
  11  -3  12   41.70   10.40 
 -11   3 -12   63.39   12.00 
  11   3  12   57.99   11.00 
 -14  -4  12   19.30    9.90 
  14  -4 -12   34.00    8.20 
  14   4 -12   28.70    8.30 
 -14   4  12   41.20   10.60 
 -14   4  12   27.30   10.10 
 -12  -4  12   10.30    9.20 
  12  -4 -12   22.60    7.50 
  12   4 -12   34.10    8.20 
 -12   4  12   17.50    9.40 
 -10  -4  12  101.49   14.50 
  10  -4 -12  128.89   14.10 
 -10   4  12  141.59   18.00 
  10   4 -12  128.39   14.90 
 -10   4  12  140.99   16.30 
   8   4 -12   23.40    7.10 
  -8   4  12   50.69    9.00 
  -8   4  12   39.40   10.00 
  -6   4  12  270.77   23.50 
  -6   4  12  289.07   21.40 
  -4   4  12   62.09   10.20 
   4   4 -12   41.50    7.40 
  -2   4  12  362.56   28.20 
   2   4 -12  369.46   25.70 
   0   4  12   34.60    8.90 
   2  -4  12  390.06   26.10 
   2   4  12  355.66   28.60 
   4   4  12   39.70    9.30 
  -4   4 -12   19.10   14.10 
   6  -4  12  204.68   18.80 
  -6   4 -12  245.98   21.80 
   6   4  12  225.38   21.10 
   8  -4  12   12.00    7.70 
  -8   4 -12   20.30    9.30 
   8   4  12   10.80    7.90 
  10  -4  12   72.29   12.70 
  10   4  12  155.78   20.20 
 -10   4 -12  112.39   13.90 
 -13  -5  12   28.70   10.30 
  13  -5 -12    9.20    6.70 
  13   5 -12   12.80    7.30 
 -13   5  12    8.30    8.90 
 -13   5  12   -4.00    9.60 
 -11  -5  12  112.29   13.80 
  11   5 -12   95.09   12.00 
 -11   5  12  118.49   15.90 
 -11   5  12   81.99   13.40 
  -9   5  12   28.80   16.50 
  -9   5  12   55.19   10.00 
   9   5 -12   54.69    8.90 
   7   5 -12  179.18   16.60 
  -7   5  12  194.28   17.10 
  -7   5  12  147.09   19.20 
  -5   5  12   53.69    8.60 
   5   5 -12   77.19    9.50 
  -5   5  12   91.99   11.40 
  -3   5  12  212.68   16.70 
  -3   5  12  208.48   20.10 
   3   5 -12  209.88   19.40 
   1   5 -12  106.19   13.00 
   1  -5  12  153.58   19.50 
  -1   5 -12  199.58   17.40 
   1   5  12  163.38   18.40 
   3  -5  12   97.89   12.60 
   3   5  12  115.69   13.60 
  -3   5 -12  136.19   16.10 
   5  -5  12   83.29   10.70 
  -5   5 -12  101.99   12.40 
   5   5  12   96.79   12.80 
   7  -5  12   65.19   10.20 
   7   5  12   71.89   11.20 
  -7   5 -12   75.19   11.60 
   9  -5  12   27.80    9.20 
   9   5  12   26.20    8.80 
  -9   5 -12   32.00    9.90 
  14  -6 -12   26.70    8.00 
 -14  -6  12   61.49   11.80 
  14   6 -12   39.20    8.90 
 -14   6  12   12.00   10.10 
 -14   6  12   50.99   12.40 
  12  -6 -12   33.90    7.60 
 -12  -6  12   36.10   10.60 
  12   6 -12   47.40    8.90 
 -12   6  12   34.40   11.30 
 -12   6  12   31.20    9.80 
 -10  -6  12  118.79   17.00 
 -10  -6  12  163.58   14.90 
  10   6 -12  145.09   15.70 
 -10   6  12  111.89   15.70 
 -10   6  12  125.29   16.70 
  -8   6  12   46.10    9.10 
  -8   6  12   41.10   10.80 
   8   6 -12   47.00    8.60 
  -6   6  12  230.08   20.20 
   6   6 -12  233.38   20.00 
  -6   6  12  305.37   23.50 
   4   6 -12   50.99    8.20 
  -4   6  12   52.99   10.40 
  -4   6  12   40.70    7.50 
  -2   6  12  340.27   27.00 
   2   6 -12  331.27   24.10 
   0   6  12   36.20    9.50 
   0   6 -12   34.40    7.00 
   2  -6  12  302.27   22.60 
   2   6  12  307.87   25.30 
  -2   6 -12  308.77   23.70 
   4  -6  12   13.20    6.60 
   4   6  12   23.30    8.60 
  -4   6 -12   19.10    8.40 
   6  -6  12  149.39   16.70 
   6   6  12  197.18   19.90 
  -6   6 -12  205.38   19.80 
   8  -6  12   10.90    7.80 
  -8   6 -12   10.00    8.50 
   8   6  12    6.60    7.90 
  10  -6  12   67.39   14.30 
  10   6  12   58.39   10.60 
 -10   6 -12   62.99   13.30 
  13  -7 -12   17.00    7.10 
 -13  -7  12   21.60   14.50 
  13   7 -12    1.40    6.60 
 -13   7  12  -10.60    8.80 
 -13   7  12    9.90    9.00 
 -11  -7  12   66.99   11.80 
 -11   7  12   33.80   11.70 
  11   7 -12   64.49    9.90 
 -11   7  12   48.90   10.30 
  -9  -7  12    7.70    8.80 
  -9   7  12   17.00    8.50 
   9   7 -12   13.00    7.00 
  -9   7  12    8.70    9.80 
  -7   7  12  109.49   14.10 
  -7   7  12   86.19   11.40 
   7   7 -12  105.09   13.20 
  -5   7  12   20.60    7.20 
  -5   7  12   25.50    9.60 
   5   7 -12   29.80    7.20 
  -3   7  12  120.59   14.60 
   3   7 -12  135.99   13.90 
  -3   7  12  128.89   13.80 
  -1   7  12   45.70   10.20 
   1  -7  12   88.19   10.30 
   1   7  12  104.69   13.60 
  -1   7 -12  109.19   10.90 
   3  -7  12   63.79    9.10 
   3   7  12   61.49   10.90 
   5  -7  12   44.90    8.80 
  -5   7 -12   57.39    9.90 
   5   7  12   79.99   12.10 
   7  -7  12   55.89    9.80 
   7   7  12   57.79   11.40 
  -7   7 -12   49.70   10.20 
   9  -7  12   15.20    8.90 
   9   7  12   20.40    8.90 
  -9   7 -12   12.80    9.10 
  12   8 -12   16.90    9.00 
 -12   8  12    8.40   10.00 
 -12   8  12    9.10    8.80 
 -10  -8  12   43.90   10.70 
  10   8 -12   37.10    8.60 
 -10   8  12   40.50    9.80 
 -10   8  12   40.40   11.70 
  -8   8  12    7.40    8.00 
   8   8 -12    0.70    6.00 
  -8   8  12   19.00    9.60 
   6   8 -12   80.59   10.00 
  -6   8  12   55.59    9.80 
  -6   8  12   86.19   12.80 
   4   8 -12    2.20    6.10 
  -4   8  12    2.20    6.50 
  -4   8  12    3.40    8.60 
   2   8 -12  134.29   13.40 
  -2   8  12  148.39   17.80 
  -2   8  12   94.89   13.00 
   0   8  12    6.30    8.50 
   0   8  12    2.60    5.40 
   2  -8  12  132.79   13.80 
  -2   8 -12  124.29   15.30 
   2   8  12  121.19   14.80 
   4  -8  12    8.40    6.60 
  -4   8 -12   11.40    7.70 
   4   8  12    9.20    8.50 
   6  -8  12   64.89   10.10 
  -6   8 -12   58.99   10.80 
   6   8  12  111.59   13.40 
   8  -8  12    7.70    9.40 
   8   8  12   12.90   10.80 
  -8   8 -12    1.30    8.40 
 -11  -9  12   18.30   13.00 
  11   9 -12   24.50    9.30 
 -11   9  12   35.40   12.00 
 -11   9  12   27.90    9.40 
   9   9 -12   16.30    7.30 
  -9   9  12    7.10    8.00 
  -9   9  12   30.50   11.20 
   7   9 -12   51.99    9.00 
  -7   9  12   52.49   11.70 
  -7   9  12   49.30    9.60 
  -5   9  12    5.60    6.90 
   5   9 -12   29.40    7.20 
  -5   9  12   14.30    9.80 
   3   9 -12   54.49    8.70 
  -3   9  12   37.20    8.00 
  -3   9  12   56.49   11.20 
  -1   9  12   22.20    9.20 
  -1   9  12   25.90    6.90 
   1  -9  12   50.89    8.00 
   1   9  12   50.09   10.50 
  -1   9 -12   29.00    6.90 
   1   9  12   38.60    7.70 
   3  -9  12   20.10    7.30 
   3   9  12   21.20    6.70 
   3   9  12   21.90    9.30 
  -3   9 -12   25.60    7.80 
   5  -9  12   22.60    7.60 
  -5   9 -12   25.80    8.50 
   5   9  12   11.60    9.00 
   7   9  12   14.30   10.50 
  -7   9 -12   25.90    9.00 
 -10  10  12   26.80   12.30 
  10  10 -12   43.80    8.90 
 -10  10  12   36.60    9.60 
  -8  10  12   16.70   10.70 
   8  10 -12   10.80    6.90 
  -8  10  12   11.90    8.40 
  -6  10  12   41.30    9.10 
  -6  10  12   63.99   12.60 
   6  10 -12   72.09    9.70 
  -4  10  12   17.50    9.70 
  -4  10  12   19.80    7.50 
   4  10 -12   17.00    7.10 
   2  10 -12   78.79   10.20 
  -2  10  12   59.19    9.60 
  -2  10  12   99.69   13.00 
   0  10  12    1.10    5.70 
   0  10  12    0.00    8.30 
   2 -10  12   77.69    9.50 
   2  10  12   59.59    9.10 
   2  10  12   80.39   12.50 
  -2  10 -12   61.49    9.80 
   4 -10  12   -0.20    6.80 
   4  10  12   10.90    9.00 
   4  10  12    3.90    5.70 
  -4  10 -12   11.00    6.70 
   6 -10  12   33.40    9.10 
  -6  10 -12   16.20    8.20 
   6  10  12   36.50    8.20 
   6  10  12   55.29   10.70 
   9  11 -12    3.10    7.00 
  -9  11  12    3.30   11.50 
   7  11 -12   22.70   14.60 
  -7  11  12   33.30   11.40 
  -7  11  12    9.70    7.70 
  -5  11  12    4.60    7.50 
  -5  11  12    6.40    9.80 
   5  11 -12    4.50    6.50 
  -3  11  12   22.40    7.50 
   3  11 -12   24.40    8.00 
  -3  11  12   30.80   10.10 
  -1  11  12    7.40    6.40 
   1  11 -12    9.00    6.90 
  -1  11  12   -5.60    8.80 
   1  11  12   26.60   10.30 
   1  11  12   24.70    7.50 
   3 -11  12   20.60   11.60 
  -3  11 -12    8.00    6.50 
   3  11  12    9.10    7.30 
   5 -11  12   23.20    7.90 
   5  11  12   15.20    9.20 
   5  11  12    9.20    6.40 
  -5  11 -12    0.40    6.80 
  -6  12  12    8.10   15.00 
  -6  12  12   11.40   10.40 
   6  12 -12   29.20    8.00 
  -4  12  12    2.30    6.80 
  -2  12  12   15.90    7.10 
   0  12  12    3.90    7.80 
   2  12  12   42.20   10.70 
   2  12  12   32.20    8.20 
  -2  12 -12   23.20    6.70 
  14   0 -13    2.50    6.60 
 -14   0  13  -12.60    9.10 
  12   0 -13    0.20    6.10 
 -12   0  13  -10.80    8.20 
  10   0 -13    2.20    5.70 
 -10   0  13   -9.70    5.90 
   8   0 -13   -3.90    4.90 
   6   0 -13   -2.10    4.80 
  -6   0  13   -4.30    4.90 
   4   0 -13   -1.60    4.50 
  -4   0  13    6.80    5.40 
   2   0 -13   -0.90    4.10 
  -2   0  13   -4.00    5.40 
   0   0  13    3.50    5.80 
   2   0  13   -1.00    7.00 
   4   0  13    5.20    6.80 
   6   0  13   -6.10    6.40 
   8   0  13    8.70    7.10 
  10   0  13    2.90    6.80 
 -15  -1  13    7.30    9.40 
  15  -1 -13   -0.90    7.40 
  15   1 -13   -7.10    7.50 
 -15   1  13  -14.20    8.20 
  13  -1 -13    3.00    5.80 
 -13  -1  13    2.20    9.20 
  13   1 -13   -2.10    6.10 
 -13   1  13   -5.20    8.60 
 -11  -1  13   -0.20    8.40 
 -11  -1  13    7.10    6.50 
  11  -1 -13   -3.40    5.50 
  11   1 -13    5.80    6.00 
 -11   1  13    5.00    8.30 
  -9  -1  13   -1.40    7.60 
   9  -1 -13    7.70    6.30 
  -9  -1  13   -2.70    6.30 
  -9   1  13   22.20    6.20 
   9   1 -13    6.30    5.90 
  -9   1  13    7.20    7.60 
   7  -1 -13    4.30    5.10 
   7   1 -13    9.80    5.70 
  -7   1  13   -1.40    6.30 
   5  -1 -13   24.30    5.90 
   5   1 -13   27.10    6.60 
  -5   1  13   32.60    7.20 
  -3  -1  13   17.40    5.90 
   3   1 -13   11.20    5.10 
  -3   1  13    8.30    6.40 
  -1  -1  13   26.10    6.70 
   1   1 -13   25.80    6.00 
  -1   1  13   36.40    8.00 
   1  -1  13    7.80    6.00 
   1   1  13   10.10    7.00 
   3  -1  13   18.10    7.20 
   3  -1  13   10.20    4.80 
   3   1  13   14.90    7.40 
   5  -1  13   12.50    5.20 
   5  -1  13    5.30    6.60 
   5   1  13    2.50    6.60 
   7  -1  13    4.00    5.90 
   7   1  13   -0.10    6.70 
   9  -1  13   11.60    6.90 
   9   1  13   -7.00    6.90 
  14  -2 -13   -3.60    5.80 
  14   2 -13    4.10    6.70 
 -14   2  13   -2.60   10.40 
 -12  -2  13  -11.20    8.50 
  12  -2 -13    9.70    6.40 
  12   2 -13   -4.30    5.70 
 -12   2  13   16.70    9.10 
 -10  -2  13    2.00    8.20 
  10  -2 -13    4.00    5.90 
 -10  -2  13  -11.40    5.50 
 -10   2  13    6.60    8.00 
 -10   2  13    5.20    6.10 
 -10   2  13   14.50    7.60 
  10   2 -13    1.10    5.80 
   8  -2 -13    9.60    5.40 
  -8   2  13    2.50    7.00 
  -8   2  13  -11.20    4.80 
  -8   2  13    7.10    6.90 
   8   2 -13    2.50    5.80 
   6   2 -13    3.00    5.20 
  -6   2  13   13.00    7.10 
  -4   2  13   12.30    7.20 
   4   2 -13    7.70    5.40 
  -2  -2  13    9.80    5.20 
   2   2 -13   -1.30    5.10 
  -2   2  13    7.80    6.50 
   0  -2  13   14.70    6.10 
   0   2 -13   16.20    5.40 
   0   2  13   13.80    7.20 
   2  -2  13    2.00    5.60 
   2   2  13    9.50    7.40 
   4  -2  13   14.00    5.60 
   4  -2  13    8.20    6.70 
   4   2  13   11.30    7.20 
   6  -2  13   -7.60    5.10 
   6   2  13    3.20    6.80 
   8  -2  13    2.50    6.60 
  -8   2 -13    3.10    9.30 
   8   2  13    2.40    7.40 
  10  -2  13  -10.60    6.80 
  10   2  13    0.20    7.20 
 -10   2 -13    6.70    9.50 
 -13  -3  13    8.30    9.70 
  13  -3 -13   -0.90    6.40 
 -13   3  13   11.50    9.30 
  13   3 -13   18.50    7.10 
 -11  -3  13   15.80    7.00 
 -11  -3  13   27.00    9.70 
  11  -3 -13    9.70    6.30 
 -11   3  13   19.80    8.50 
  11   3 -13    8.10    6.80 
 -11   3  13   18.00    9.10 
   9  -3 -13   42.90    7.00 
  -9   3  13   14.10    8.00 
   9   3 -13   36.10    7.70 
  -9   3  13   13.90    8.40 
  -9   3  13   24.30    6.60 
  -7   3  13   49.50    9.60 
   7   3 -13   43.10    7.80 
  -7   3  13   28.10    7.60 
   5   3 -13   44.70    8.30 
  -5   3  13   54.89   10.10 
  -3   3  13   50.29   10.10 
   3   3 -13   65.49    8.50 
  -1  -3  13   61.89    8.30 
  -1   3  13   67.49   10.40 
   1   3 -13   50.39    7.90 
   1  -3  13   57.59    8.50 
   1   3  13   61.09   10.50 
   3  -3  13   39.70    7.20 
   3   3  13   34.10    9.60 
   5  -3  13   47.50    7.90 
   5   3  13   33.20    9.20 
   7  -3  13   19.20    7.20 
  -7   3 -13    9.00    9.10 
   7   3  13   15.50    7.80 
   9  -3  13   11.70    7.60 
   9   3  13   19.80    9.00 
  -9   3 -13    2.20    8.90 
 -14  -4  13    7.50    9.60 
  14  -4 -13    3.20    6.30 
 -14   4  13   -0.50    8.90 
  14   4 -13   -6.40    6.20 
 -14   4  13   21.80   16.80 
  12  -4 -13   -2.50    6.10 
 -12  -4  13    9.00    9.20 
 -12   4  13  -10.90    7.70 
  12   4 -13   -4.80    6.00 
 -12   4  13   -4.80    9.00 
  10   4 -13   -3.10    6.10 
 -10   4  13    7.40    8.20 
   8   4 -13    9.90    6.50 
  -8   4  13   -6.00    6.80 
  -8   4  13   -3.50    8.20 
  -6   4  13   13.40    8.30 
   6   4 -13    3.60    5.70 
  -6   4  13    3.00    5.80 
  -4   4  13    2.80    7.50 
   4   4 -13   15.50    6.70 
   2   4 -13   -0.60    6.40 
   0   4  13   16.80    8.00 
   2  -4  13    4.60    5.80 
   2   4  13   -3.10    7.30 
   4  -4  13    5.30    5.80 
   4   4  13   17.40    8.50 
  -4   4 -13   23.50    8.80 
   6  -4  13    5.40    5.90 
   6   4  13   -7.30    6.80 
  -6   4 -13    0.40    8.50 
   8  -4  13   -2.80    6.60 
   8   4  13   -0.70    7.10 
  -8   4 -13   -0.10    8.60 
  10  -4  13   -8.80    7.80 
  13  -5 -13   -5.20    5.80 
 -13   5  13    1.00    9.10 
 -13   5  13   17.70    9.70 
  11  -5 -13    8.00    5.90 
 -11   5  13    1.40    8.10 
 -11   5  13  -10.30    8.60 
  11   5 -13    0.10    6.20 
   9   5 -13   -6.50    5.50 
  -9   5  13    2.50    8.70 
  -9   5  13    3.30    7.50 
   7   5 -13   -7.80    5.20 
  -7   5  13   -7.20    6.30 
  -7   5  13   -2.10    8.00 
   5   5 -13    8.90    5.90 
  -5   5  13    4.30    8.10 
  -3   5  13    0.00    7.90 
   3   5 -13   -4.20    5.30 
  -1   5  13   20.00    9.00 
   1   5 -13    6.30    5.70 
  -1   5 -13    7.50    7.20 
   1   5  13   -7.60    6.90 
   3  -5  13   10.00    6.00 
  -3   5 -13    4.00    8.00 
   3   5  13   18.60    8.40 
   5  -5  13   -2.50    5.70 
  -5   5 -13    4.00    8.00 
   5   5  13   -8.80    7.60 
   7  -5  13    6.10    6.60 
  -7   5 -13  -16.20    7.70 
   7   5  13   -2.50    7.60 
   9  -5  13   -4.50    7.10 
   9   5  13   -0.10    7.20 
 -12  -6  13    1.50   13.10 
 -12   6  13    2.20    9.20 
 -12   6  13    8.30    8.80 
  12   6 -13   15.30    9.10 
  10   6 -13    5.50    6.90 
 -10   6  13    1.00    8.00 
 -10   6  13    7.80   10.00 
  -8   6  13   28.40    8.50 
   8   6 -13   32.50    7.90 
  -8   6  13   31.80   10.40 
  -6   6  13   -3.70    6.20 
  -6   6  13    7.10    8.70 
   6   6 -13   12.70    6.40 
  -4   6  13   44.70   10.60 
   4   6 -13   39.70    8.00 
  -2   6  13   35.10    9.90 
   2   6 -13   20.80    6.60 
   0   6 -13   52.19    8.00 
   0   6  13   59.49   11.20 
   2  -6  13    6.90    5.90 
  -2   6 -13   20.20    7.60 
   2   6  13   19.40    8.50 
   4  -6  13   29.10    7.30 
  -4   6 -13   15.60    8.30 
   4   6  13   15.20    9.00 
   6  -6  13    5.90    6.30 
   6   6  13    8.60    8.40 
  -6   6 -13    9.60    8.00 
   8  -6  13    3.40    7.30 
   8   6  13    5.50    9.50 
  -8   6 -13    4.50    8.30 
 -11   7  13   24.70    9.10 
  11   7 -13   17.00    7.80 
 -11   7  13   23.90   10.70 
  -9   7  13   10.20   10.00 
   9   7 -13   16.70    7.10 
  -9   7  13   -8.10    7.60 
   7   7 -13   34.50    7.90 
  -7   7  13   24.80    7.90 
  -7   7  13   43.30   10.80 
   5   7 -13   24.00    7.10 
  -5   7  13   26.40    9.80 
  -5   7  13   15.60    6.70 
  -3   7  13   46.30   10.50 
   3   7 -13   39.40    7.90 
  -3   7  13   41.40    7.20 
   1   7 -13   20.20    6.70 
  -1   7  13   30.80    9.70 
   1   7  13   49.40   10.90 
  -1   7 -13   59.19    8.30 
   3  -7  13    7.70    6.20 
   3   7  13    9.50    8.70 
  -3   7 -13   10.20    7.30 
   5  -7  13   38.90    8.20 
   5   7  13   33.60    9.90 
  -5   7 -13   32.70    9.20 
   7  -7  13    9.40    6.90 
  -7   7 -13    7.90    8.30 
  10   8 -13   -1.30    6.50 
 -10   8  13   -4.70    9.60 
 -10   8  13    7.00    8.20 
  -8   8  13   -4.20    9.60 
  -8   8  13    0.70    7.10 
   8   8 -13    8.90    6.40 
  -6   8  13  -15.40    8.20 
  -6   8  13   -9.70    6.10 
   6   8 -13   -5.00    5.70 
  -4   8  13    5.50    8.90 
  -4   8  13   -4.10    5.70 
   4   8 -13    5.70    6.10 
   2   8 -13    0.00    5.80 
  -2   8  13    6.20    5.60 
  -2   8  13   -1.00    8.30 
   0   8  13    9.80    9.10 
   2  -8  13   -2.90    5.70 
  -2   8 -13   -2.00    7.50 
   2   8  13   -1.00    8.10 
   4  -8  13    4.00    6.50 
   4   8  13   -7.90    7.60 
  -4   8 -13  -12.30    6.80 
   6  -8  13   -5.30    6.60 
  -6   8 -13    5.70    7.70 
  -9   9  13    4.50    8.00 
  -9   9  13   -2.70    9.70 
  -7   9  13   -5.70    9.30 
  -7   9  13   -1.40    6.90 
   7   9 -13   -1.60    6.10 
   5   9 -13   -0.10    6.10 
  -5   9  13    3.80    9.20 
  -5   9  13   11.60    7.10 
  -3   9  13    7.90    9.10 
   3   9 -13   -4.50    5.70 
  -3   9  13    5.80    6.00 
  -1   9  13  -13.60    8.10 
   1   9 -13    7.20    6.00 
  -1   9 -13    5.50    5.60 
   1   9  13    3.90    8.90 
   1   9  13    1.80    5.50 
   3  -9  13    4.90    6.50 
   3   9  13   -9.20    7.80 
  -3   9 -13    6.30    6.80 
   5  -9  13   -1.80    8.10 
   5   9  13  -10.50   12.70 
  -5   9 -13    5.10    7.60 
  -8  10  13   19.60   11.40 
  -8  10  13   -0.50   10.30 
   8  10 -13   16.20    7.50 
   6  10 -13    4.80    6.50 
  -6  10  13    3.40    7.10 
  -6  10  13    6.00   10.20 
  -4  10  13   25.10   10.10 
  -4  10  13   25.90    7.30 
   4  10 -13   21.50    7.40 
  -2  10  13    9.40    9.20 
   2  10 -13    5.70    6.60 
  -2  10  13    6.30    6.30 
   0  10  13   14.70    9.70 
   0  10  13   14.90    6.50 
   2  10  13   16.00    9.70 
  -2  10 -13    4.10    6.10 
   2  10  13    5.60    6.10 
   4 -10  13    5.10    7.90 
   4  10  13   12.70    8.90 
   4  10  13    3.80    6.00 
  -4  10 -13    4.80    6.60 
  -7  11  13   11.30   10.70 
  -7  11  13    6.40    7.80 
   7  11 -13    8.00    6.80 
   5  11 -13    4.20    7.90 
  -3  11  13    9.30    7.00 
  -3  11  13   17.50   13.10 
   1  11 -13   11.50   13.10 
  -1  11  13    3.60    7.80 
   1  11  13   22.10   10.20 
   1  11  13    8.80    7.80 
   3 -11  13   -2.10    6.00 
  -3  11 -13  -16.00    5.80 
   3  11  13    5.20    5.70 
   2  12 -13   -0.60    6.80 
  -2  12  13    1.00    6.30 
  14   0 -14   13.20    6.80 
 -14   0  14   -2.30    8.70 
 -12   0  14    3.80    8.60 
  12   0 -14   11.60    6.30 
  10   0 -14    7.90    6.20 
   8   0 -14   14.10    5.90 
   6   0 -14   27.80    6.70 
   4   0 -14    0.40    4.90 
  -4   0  14    3.30    5.50 
   2   0 -14   67.69    8.40 
  -2   0  14   74.39    9.60 
   0   0  14    7.20    6.10 
   2   0  14  102.19   12.00 
   4   0  14    5.50    6.70 
   6   0  14   59.69   10.10 
  13  -1 -14    4.20    6.10 
  13   1 -14   15.70    6.80 
  11  -1 -14   51.39    8.70 
 -11   1  14   55.89   10.80 
  11   1 -14   46.30    8.40 
   9  -1 -14   12.90    6.10 
   9   1 -14    4.40    5.90 
   7  -1 -14   87.59   11.50 
   7   1 -14  100.89   11.30 
   5  -1 -14    9.30    4.90 
  -5   1  14    5.30    5.70 
   5   1 -14   -0.60    5.10 
  -3  -1  14  109.09   12.50 
   3   1 -14  115.19   12.20 
  -3   1  14  120.89   14.50 
  -1  -1  14    7.90    5.70 
  -1   1  14    6.00    6.50 
   1   1 -14    9.00    5.10 
  -1   1 -14   77.89   10.10 
   1   1  14   96.29   11.80 
   3  -1  14    8.20    6.70 
   3   1  14    4.80    6.90 
   5  -1  14   62.69    9.50 
   5  -1  14   76.89   10.90 
   5   1  14   50.79    9.80 
   7  -1  14    1.70    5.50 
   7   1  14   14.10    7.50 
   9  -1  14   28.20    7.00 
   9   1  14   14.00    7.70 
 -12  -2  14   40.80   10.50 
  12  -2 -14   18.50    6.80 
  12   2 -14   27.70    7.60 
 -12   2  14   32.20    9.70 
  10  -2 -14   48.60    8.00 
  10   2 -14   58.89    9.10 
 -10   2  14   50.09    8.60 
   8  -2 -14   56.59    8.10 
  -8   2  14   57.19    9.60 
   8   2 -14   60.09    9.10 
   6   2 -14  115.19   13.60 
  -6   2  14  138.19   16.40 
   4   2 -14   46.30    7.80 
  -4   2  14   57.49    9.50 
  -2  -2  14  165.88   15.20 
  -2   2  14  162.28   19.10 
   2   2 -14  179.88   15.00 
   0  -2  14   35.70    7.40 
   0   2  14   29.20    8.40 
   0   2 -14   43.20    6.90 
   2  -2  14  184.08   17.60 
   2   2  14  195.08   19.20 
   4  -2  14   11.50    5.90 
   4   2  14   20.70    7.90 
   6  -2  14   89.99   11.30 
   6   2  14   97.49   12.30 
   8  -2  14    1.40    5.90 
  -8   2 -14   14.00    9.40 
   8   2  14   11.00   12.40 
  13  -3 -14   16.70    6.70 
 -13  -3  14    5.90    9.20 
  13   3 -14   -0.40    7.30 
 -13   3  14   -8.00    9.30 
  11  -3 -14   29.90    7.20 
 -11   3  14   40.10   12.30 
  11   3 -14   37.20    8.30 
 -11   3  14   52.99   10.00 
  -9   3  14   -3.60    7.30 
   9   3 -14   -0.10    5.70 
  -9   3  14   10.20    7.90 
  -9   3  14   19.00    6.40 
  -7   3  14  104.99   12.90 
   7   3 -14  101.49   11.80 
  -5   3  14    3.30    7.40 
   5   3 -14    1.30    5.40 
  -3   3  14  150.98   22.20 
   3   3 -14  129.89   15.80 
  -1  -3  14    1.80    4.90 
  -1   3  14   14.70    7.30 
   1   3  14  107.89   13.70 
   3  -3  14   10.60    5.40 
   3   3  14   14.40    8.10 
   5  -3  14   61.69    8.90 
   5   3  14   71.59   11.70 
   7  -3  14    1.90    5.90 
  -7   3 -14    8.00    9.10 
   7   3  14   21.70    8.20 
  12  -4 -14   10.80    6.30 
 -12   4  14   23.90   12.50 
  12   4 -14   13.80    7.00 
 -12   4  14   -1.50    8.90 
 -10   4  14    6.50    8.20 
  10   4 -14   19.20    7.00 
 -10   4  14   32.10    9.60 
   8   4 -14   30.10    7.40 
  -8   4  14   25.40    9.20 
   6   4 -14   45.30    8.00 
  -6   4  14   37.70   10.00 
   4   4 -14   14.70    5.90 
  -4   4  14   17.90    8.50 
  -2   4  14   97.29   12.70 
   2   4 -14   93.39   12.10 
   0   4 -14   14.80    6.10 
   0   4  14    9.20    7.90 
  -2   4 -14  112.59   13.10 
   2   4  14  135.39   17.30 
   4  -4  14   -2.40    5.70 
   4   4  14    8.60    8.30 
  -4   4 -14   21.50    8.90 
   6  -4  14   72.79   10.40 
  -6   4 -14   91.69   12.80 
   6   4  14   89.09   12.10 
   8  -4  14   -4.10    6.30 
  -8   4 -14   18.90   16.20 
   8   4  14    2.60    7.20 
  11   5 -14   63.69    9.50 
 -11   5  14   35.10   11.00 
 -11   5  14   52.09   10.30 
  -9   5  14   13.80    9.20 
   9   5 -14    5.40    6.50 
  -9   5  14   15.80    7.70 
  -7   5  14   89.99   12.90 
  -7   5  14   73.79    9.90 
   7   5 -14  104.69   13.00 
  -5   5  14   19.40    8.60 
   5   5 -14   15.00    6.70 
  -3   5  14  140.29   15.30 
   3   5 -14  108.09   13.70 
  -1   5  14   12.80    8.50 
   1   5 -14   23.10    6.90 
   1   5 -14    4.00    5.80 
   1   5  14  109.39   13.80 
  -1   5 -14  119.89   15.60 
   3  -5  14   16.80    6.30 
   3   5  14   20.10    9.20 
  -3   5 -14   19.90    8.50 
   5  -5  14   51.39    9.00 
  -5   5 -14   65.79   10.90 
   5   5  14   60.09   11.10 
   7  -5  14   10.30    7.00 
  -7   5 -14   -8.60    7.90 
  12   6 -14   28.70    7.70 
 -12   6  14   24.20    9.40 
 -10   6  14   42.50   11.80 
 -10   6  14   50.29   10.10 
  10   6 -14   76.69   10.40 
  -8   6  14   42.90    8.70 
  -8   6  14   51.79   11.30 
   8   6 -14   56.49    9.10 
   6   6 -14  130.19   14.50 
  -6   6  14  137.79   15.60 
  -4   6  14   93.79   12.80 
   4   6 -14   67.49    9.60 
  -2   6  14  209.28   20.90 
   2   6 -14  173.18   16.80 
   0   6 -14   47.20    8.00 
   0   6  14   55.09   10.70 
   2   6  14  173.08   19.40 
  -2   6 -14  164.58   17.20 
   4  -6  14   20.00    7.20 
   4   6  14   39.40    9.80 
  -4   6 -14   34.60    8.80 
   6  -6  14  120.79   13.70 
  -6   6 -14   92.69   13.10 
 -11   7  14   14.90   11.10 
 -11   7  14   20.20    8.60 
  11   7 -14   42.00    8.40 
  -9   7  14   12.70    9.90 
   9   7 -14    8.20    6.90 
  -9   7  14   -1.00    7.10 
  -7   7  14   94.39   13.70 
   7   7 -14   91.39   11.60 
   5   7 -14   24.30    7.20 
  -5   7  14   14.30    6.40 
  -5   7  14   17.80   10.10 
   3   7 -14  112.99   12.20 
  -3   7  14   92.19   13.90 
  -1   7  14   28.90   10.00 
   1   7 -14   15.10    6.70 
  -1   7 -14  100.89   15.90 
   1   7  14   98.19   13.30 
   3  -7  14   29.50    7.20 
  -3   7 -14    9.40    7.30 
   3   7  14   33.20    9.60 
   5  -7  14   49.70    9.40 
  -5   7 -14   61.79   10.30 
 -10   8  14   11.30    7.90 
 -10   8  14   31.10   11.60 
  10   8 -14   17.20    7.30 
  -8   8  14   13.00   10.40 
   8   8 -14   23.90    7.30 
  -8   8  14   16.00    7.90 
  -6   8  14   33.10   10.50 
  -6   8  14   35.10    8.10 
   6   8 -14   52.59    8.80 
   4   8 -14   25.30    7.60 
  -4   8  14   23.10    9.80 
   2   8 -14   72.99   10.10 
  -2   8  14   75.39   12.70 
   0   8  14    8.20    9.40 
  -2   8 -14   76.99   10.30 
   2   8  14   81.09   12.50 
   4  -8  14   12.60    6.90 
  -4   8 -14   -3.10    7.20 
   9   9 -14   14.30    7.10 
  -7   9  14   56.39   12.60 
  -5   9  14   22.00   10.40 
  -5   9  14   13.30    6.80 
   5   9 -14   19.10    7.40 
  -3   9  14   90.49   12.90 
   3   9 -14  116.59   14.00 
  -3   9  14  118.29   14.80 
  -1   9  14   32.80   10.40 
   1   9 -14   17.90    7.30 
   1   9  14   93.99   13.80 
   3   9  14   24.40    9.60 
  -3   9 -14   22.20    7.40 
  -6  10  14   52.69   17.90 
  -6  10  14   40.00    9.00 
   6  10 -14   70.59   10.20 
   4  10 -14   46.10   13.50 
   0  10  14   69.39   14.20 
   0  10  14   43.60    8.60 
  -2  10 -14   78.49    9.50 
   2  10  14   95.09   13.00 
  12   0 -15   -4.80    5.60 
 -12   0  15  -17.80    8.10 
  10   0 -15   -3.00    5.50 
   8   0 -15   -1.20    5.30 
   6   0 -15   -1.70    5.80 
   4   0 -15   -2.50    4.60 
  -4   0  15    1.80    5.50 
  -2   0  15   -4.00    5.90 
   0   0  15    9.50    6.20 
   2   0  15   -0.90    5.90 
   4   0  15   -3.00    6.00 
   6   0  15   15.00    7.20 
  11  -1 -15    7.70    6.00 
  11   1 -15    6.80    6.00 
   9  -1 -15    2.70    5.10 
   9   1 -15   10.30    5.90 
   7  -1 -15   10.00    5.60 
   7   1 -15   23.10    6.50 
  -7   1  15   19.20    6.40 
  -5   1  15    9.70    6.40 
   5   1 -15   18.00    7.30 
  -3  -1  15   14.00    5.70 
  -3   1  15   22.90   13.20 
   3   1 -15   13.50    5.70 
   1   1 -15   17.90    5.70 
  -1   1  15   23.00    7.40 
   1  -1  15   11.40    6.60 
  -1   1 -15   24.70    5.70 
   1   1  15    8.40    6.90 
   3  -1  15   40.70    8.30 
   3   1  15   30.80    8.10 
   5  -1  15    6.60    6.60 
   5   1  15    6.30    7.10 
  12  -2 -15   -2.00    5.20 
 -12   2  15   -3.90    7.80 
  12   2 -15   -4.90    5.70 
  10  -2 -15   -2.70    4.70 
  10   2 -15   -6.90    5.50 
  -8   2  15   -1.90    6.80 
   8   2 -15    1.70    5.70 
  -6   2  15   -4.40    6.20 
   6   2 -15    7.20    5.70 
   4   2 -15    2.20    5.10 
  -4   2  15   -5.20    6.80 
  -2  -2  15   -2.30    5.10 
  -2   2  15   11.70    7.00 
   2   2 -15    4.10    5.80 
   0  -2  15   -2.50    6.30 
   0   2  15   -1.50    6.80 
   0   2 -15   -0.10    5.70 
   2  -2  15   -1.00    5.90 
   2   2  15    8.50    7.00 
   4   2  15    1.00    6.50 
   6  -2  15    3.00    5.30 
   6   2  15   11.20    7.20 
  11  -3 -15    5.80    5.60 
  11   3 -15    0.60    5.80 
  -9   3  15   -0.10    7.60 
   9   3 -15   -3.90    5.70 
   7   3 -15   -1.90    5.90 
  -7   3  15   -6.40    7.60 
   5   3 -15   -4.90    5.00 
  -5   3  15    7.60    7.60 
   3   3 -15    1.50    5.10 
  -3   3  15    2.20    7.10 
  -1   3  15   -3.40    7.00 
   1   3 -15    3.40    5.50 
   1   3  15   -6.50    6.90 
  -1   3 -15    4.60    5.60 
   3   3  15    3.70    7.10 
   5  -3  15   -4.50    4.80 
   5   3  15   -0.70    7.20 
  -5   3 -15    4.70    8.90 
   7  -3  15   -0.40    5.70 
   7   3  15   -2.00    6.80 
 -10   4  15   -1.70    8.20 
  10   4 -15   10.90    6.60 
 -10   4  15    7.30   10.30 
   8   4 -15    5.90    6.30 
  -8   4  15    3.10    7.90 
   6   4 -15   13.60    6.50 
  -6   4  15   -1.70    8.10 
  -4   4  15   -1.00    7.70 
   4   4 -15    5.40    5.80 
  -2   4  15   21.00    8.20 
   2   4 -15   22.60    7.00 
   0   4  15   -0.60    7.50 
   0   4 -15    3.60    5.60 
  -2   4 -15   17.20    8.20 
   2   4  15   17.50    9.00 
   4  -4  15    7.60    5.60 
   4   4  15   -2.10    7.20 
  -4   4 -15   19.50    9.00 
   6  -4  15   -3.00    5.70 
  -6   4 -15   16.20    9.00 
   6   4  15   10.80    9.20 
  11   5 -15   12.80    7.70 
 -11   5  15   -5.50    7.60 
 -11   5  15   27.20    9.60 
   9   5 -15    9.90    6.70 
  -9   5  15   21.20    9.10 
  -7   5  15   13.50    8.90 
   7   5 -15    6.40    6.70 
  -5   5  15   15.50    8.90 
   5   5 -15   13.30    6.70 
  -3   5  15   21.70    9.00 
   3   5 -15   13.50    6.70 
   1   5 -15   17.50    6.70 
  -1   5  15   33.40    9.10 
  -1   5 -15   15.50    7.40 
   1   5  15   16.00    9.00 
   3   5  15   18.40    9.40 
  -3   5 -15   11.80    7.80 
   5  -5  15    4.90    5.90 
  -5   5 -15   18.90    8.60 
  10   6 -15    1.20   10.60 
 -10   6  15   -6.10    7.00 
 -10   6  15   -2.80    8.70 
   8   6 -15    2.50    6.30 
  -8   6  15    9.00    9.10 
  -6   6  15   -8.20    8.50 
   6   6 -15    6.90    6.40 
  -4   6  15   -3.40    8.10 
   4   6 -15  -10.90    5.50 
   2   6 -15    5.40    6.10 
  -2   6  15   -6.20    7.90 
   0   6 -15    2.30    5.80 
   0   6 -15    1.80    6.70 
   0   6  15    1.60    8.00 
  -2   6 -15   -1.30    6.30 
   2   6  15    9.30    8.70 
   4  -6  15   -5.00    5.40 
  -4   6 -15    9.80    7.70 
  -9   7  15   -3.20    6.70 
  -9   7  15   19.80    9.30 
   9   7 -15    7.20    6.70 
   7   7 -15   -0.80    5.90 
  -7   7  15   -1.00    9.30 
   5   7 -15   -2.80    5.90 
  -5   7  15    0.30    8.50 
  -3   7  15   -2.00    8.70 
   3   7 -15    4.10    6.20 
   1   7 -15    5.10    6.50 
  -1   7  15   -0.70    8.50 
  -1   7 -15  -10.90    5.70 
   1   7  15  -13.10    8.00 
  -3   7 -15    5.40    6.80 
  -8   8  15   -9.20    6.10 
   8   8 -15    2.30    6.40 
  -6   8  15   19.90    8.70 
   6   8 -15   11.40    8.50 
  -6   8  15   17.50    9.90 
   4   8 -15    0.00    6.10 
  -4   8  15    9.00    9.70 
   2   8 -15   16.40    7.10 
  -2   8  15   29.20   10.40 
   0   8  15   18.90    9.30 
   0   8 -15    7.10    6.50 
  -2   8 -15   17.40    7.10 
   2   8  15   13.60    9.10 
   5   9 -15   17.10    6.80 
  -5   9  15   11.30    6.10 
   3   9 -15   -0.90    7.60 
   1   9 -15    9.40   10.90 
  -1   9  15    1.00   10.80 
  10   0 -16   33.80    6.90 
   8   0 -16   82.29   10.00 
   6   0 -16   71.29    9.00 
  -4   0  16   93.89   16.80 
  -2   0  16  105.09   13.50 
   0   0  16  110.59   12.40 
   2   0  16  114.79   14.60 
   4   0  16   49.30    9.40 
  11  -1 -16   75.09    9.80 
  11   1 -16   81.09   10.10 
   9  -1 -16   27.30    7.00 
   9   1 -16   41.70    7.90 
   7   1 -16  126.09   13.40 
   5   1 -16   54.79    8.40 
  -5   1  16   51.99    9.80 
  -3  -1  16  201.48   18.30 
  -3   1  16  188.78   17.90 
   3   1 -16  169.88   15.70 
  -1  -1  16   40.70    7.90 
  -1   1  16   48.80    8.60 
   1  -1  16  191.28   18.00 
   1   1  16  186.28   18.20 
   3  -1  16   28.80    7.90 
   3   1  16   24.40    7.60 
   5   1  16  146.69   19.80 
  10  -2 -16   88.19   11.20 
  10   2 -16   71.09   10.10 
  -8   2  16  133.09   15.50 
   8   2 -16  140.49   14.50 
  -6   2  16  151.08   16.50 
   6   2 -16  145.99   15.10 
   4   2 -16  186.68   16.40 
  -4   2  16  194.68   18.80 
   2   2 -16  224.98   17.80 
  -2   2  16  211.98   20.50 
   0  -2  16  149.88   15.70 
   0   2 -16  170.18   14.70 
   0   2  16  150.48   17.20 
   2   2  16  185.78   18.60 
  -2   2 -16  183.58   15.80 
   4   2  16   82.89   11.30 
   9   3 -16   13.20    6.60 
  -9   3  16   -1.60    7.90 
  -7   3  16  131.09   13.90 
   7   3 -16  108.79   14.00 
  -5   3  16   23.20    8.20 
   5   3 -16   27.30    7.00 
  -3   3  16  154.08   18.00 
   3   3 -16  155.58   15.20 
   1   3 -16   34.90    7.50 
  -1   3  16   31.10    9.40 
  -1   3 -16  120.89   14.00 
   1   3  16  160.28   16.10 
   3   3  16   19.90    8.30 
   5   3  16  105.79   13.80 
  -5   3 -16  114.89   13.70 
  10   4 -16   27.00   12.80 
   8   4 -16   38.50    8.00 
  -8   4  16   47.50   10.40 
   6   4 -16   49.40    8.70 
  -6   4  16   39.50    9.80 
  -4   4  16   53.49   10.60 
   4   4 -16   61.29    9.00 
   2   4 -16   83.39   10.30 
  -2   4  16   61.19   11.00 
   0   4 -16   59.59    8.90 
   0   4 -16   56.89    9.40 
   0   4  16   53.29   10.90 
  -2   4 -16   87.79   11.30 
   2   4  16   70.79   12.00 
  -4   4 -16   24.30    9.20 
   4   4  16   36.60   15.10 
  -9   5  16   -4.40    8.60 
   7   5 -16  101.09   11.60 
  -7   5  16   72.89   12.60 
  -5   5  16   28.90    9.90 
   5   5 -16   37.60    8.10 
  -3   5  16  109.29   13.90 
   3   5 -16  113.19   13.60 
   1   5 -16   24.30    7.20 
  -1   5  16   28.60    9.30 
  -1   5 -16  126.79   14.10 
   1   5  16  128.29   15.60 
  -1   5 -16  113.59   14.70 
   3   5  16   23.40   15.80 
  -3   5 -16    9.00    7.40 
  -8   6  16   49.80   11.60 
  -6   6  16   85.19   13.10 
   6   6 -16   56.09    9.60 
  -4   6  16   86.39   13.70 
   4   6 -16   98.99   12.00 
  -2   6  16   87.69   13.10 
   2   6 -16   99.39   11.60 
   0   6 -16   68.59    9.30 
   0   6  16   92.69   12.70 
   0   6 -16   84.89   10.80 
   2   6  16   70.69   14.90 
  -2   6 -16   81.69   10.40 
  -5   7  16    2.10    9.20 
   5   7 -16  -16.10   11.50 
   3   7 -16   70.79   10.20 
  -3   7  16   65.69   12.60 
   1   7 -16   17.70    7.10 
   1   7  16   59.79   11.50 
  -1   7 -16   67.59    8.80 
  -1   7 -16   41.90   15.50 
   8   0 -17   -3.10    4.90 
   6   0 -17    4.50    4.90 
  -4   0  17    0.00    5.00 
  -2   0  17    3.60    5.40 
   0   0  17    5.30    5.70 
   2   0  17    8.90    6.20 
  -7   1  17    7.90    5.90 
   7   1 -17    2.40    4.80 
  -5   1  17   -5.70    5.40 
   5   1 -17    7.70    5.10 
  -3  -1  17    1.70    5.00 
  -3   1  17    6.80    6.00 
  -1  -1  17   13.50    6.00
[truncated: 1,368 more chars]
