# Supplementary material for: Crystallization Pathways of FABr-PbBr2-DMF and FABr-PbBr2-DMSO Systems: The Comprehensive Picture of Formamidinium-Based Low-Dimensional Perovskite-Related Phases and Intermediate Solvates
Source: Int J Mol Sci. 2022 Dec 5;23(23):15344. doi: 10.3390/ijms232315344 (PMC9739158; doi:10.3390/ijms232315344)
Supplement: Supplementary file 1 [file ijms-23-15344-s001.zip › FAPbBr3_DMSO.cif]

 
data_X
 
_audit_creation_method            SHELXL-2013
_chemical_name_systematic
;
 ?
;
_chemical_name_common             ?
_chemical_melting_point           ?
_chemical_formula_moiety          
 'C2 H6 Br3 O Pb S, C H5 N2' 
_chemical_formula_sum
 'C3 H11 Br3 N2 O Pb S' 
_chemical_formula_weight          570.10

loop_
 _atom_type_symbol
 _atom_type_description
 _atom_type_scat_dispersion_real
 _atom_type_scat_dispersion_imag
 _atom_type_scat_source
 'C'  'C'   0.0047   0.0021
 'International Tables Vol C Tables 4.2.6.8 and 6.1.1.4'
 'H'  'H'   0.0000   0.0000
 'International Tables Vol C Tables 4.2.6.8 and 6.1.1.4'
 'N'  'N'   0.0086   0.0042
 'International Tables Vol C Tables 4.2.6.8 and 6.1.1.4'
 'O'  'O'   0.0148   0.0078
 'International Tables Vol C Tables 4.2.6.8 and 6.1.1.4'
 'S'  'S'   0.1482   0.1550
 'International Tables Vol C Tables 4.2.6.8 and 6.1.1.4'
 'Br'  'Br'  -0.8805   2.8944
 'International Tables Vol C Tables 4.2.6.8 and 6.1.1.4'
 'Pb'  'Pb'  -6.9732  10.4277
 'International Tables Vol C Tables 4.2.6.8 and 6.1.1.4'
 
_space_group_crystal_system       monoclinic
_space_group_IT_number            14
_space_group_name_H-M_alt         'P 21/c'
_space_group_name_Hall            '-P 2ybc'
 
_shelx_space_group_comment
;
The symmetry employed for this shelxl refinement is uniquely defined
by the following loop, which should always be used as a source of
symmetry information in preference to the above space-group names.
They are only intended as comments.
;
 
loop_
 _space_group_symop_operation_xyz
 'x, y, z'
 '-x, y+1/2, -z+1/2'
 '-x, -y, -z'
 'x, -y-1/2, z-1/2'
 
_cell_length_a                    9.9840(9)
_cell_length_b                    14.3540(15)
_cell_length_c                    9.1170(8)
_cell_angle_alpha                 90
_cell_angle_beta                  113.216(10)
_cell_angle_gamma                 90
_cell_volume                      1200.8(2)
_cell_formula_units_Z             4
_cell_measurement_temperature     100(2)
_cell_measurement_reflns_used     600 
_cell_measurement_theta_min       3.0 
_cell_measurement_theta_max       30.0 
 
_exptl_crystal_description        prism 
_exptl_crystal_colour             black 
_exptl_crystal_density_meas       ? 
_exptl_crystal_density_method     ?              
_exptl_crystal_density_diffrn     3.154          
_exptl_crystal_F_000              1016
_exptl_transmission_factor_min    ?                                             
_exptl_transmission_factor_max    ?                                             
_exptl_crystal_size_max           0.18
_exptl_crystal_size_mid           0.15
_exptl_crystal_size_min           0.12
_exptl_absorpt_coefficient_mu     29.268
_shelx_estimated_absorpt_T_min    0.271
_shelx_estimated_absorpt_T_max    0.386
_exptl_absorpt_correction_type    'multi-scan'          
_exptl_absorpt_correction_T_min   0.005                 
_exptl_absorpt_correction_T_max   0.050                 
_exptl_absorpt_process_details    'Scala (Evans, 2006)' 
 
_exptl_special_details
;
 ?
;
 
_diffrn_ambient_temperature       100(2)
_diffrn_radiation_wavelength      0.79313
_diffrn_radiation_type            synchrotron        
_diffrn_source                    ?                                         
_diffrn_measurement_device_type   'Rayonix SX165 CCD' 
_diffrn_measurement_method        '/f scan'           
_diffrn_detector_area_resol_mean  ? 
_diffrn_reflns_number             17545
_diffrn_reflns_av_unetI/netI      0.0634
_diffrn_reflns_av_R_equivalents   0.1195
_diffrn_reflns_limit_h_min        -12
_diffrn_reflns_limit_h_max        12
_diffrn_reflns_limit_k_min        -18
_diffrn_reflns_limit_k_max        18
_diffrn_reflns_limit_l_min        -11
_diffrn_reflns_limit_l_max        11
_diffrn_reflns_theta_min          2.940
_diffrn_reflns_theta_max          30.923
_diffrn_reflns_theta_full         28.417
_diffrn_measured_fraction_theta_max   0.973
_diffrn_measured_fraction_theta_full  0.976
_diffrn_reflns_Laue_measured_fraction_max    0.973
_diffrn_reflns_Laue_measured_fraction_full   0.976
_diffrn_reflns_point_group_measured_fraction_max   0.973
_diffrn_reflns_point_group_measured_fraction_full  0.976
_reflns_number_total              2656
_reflns_number_gt                 2598
_reflns_threshold_expression      'I > 2\s(I)'
_reflns_Friedel_coverage          0.000
_reflns_Friedel_fraction_max      .
_reflns_Friedel_fraction_full     .
 
_reflns_special_details
;
 Reflections were merged by SHELXL according to the crystal
 class for the calculation of statistics and refinement.
 
 _reflns_Friedel_fraction is defined as the number of unique
 Friedel pairs measured divided by the number that would be
 possible theoretically, ignoring centric projections and
 systematic absences.
;
 
_computing_data_collection        'Marccd (Doyle, 2011)'         
_computing_cell_refinement        'iMosflm (Battye et al., 2011)'
_computing_data_reduction         'iMosflm'                      
_computing_structure_solution     'SHELXT (Sheldrick, 2015)'     
_computing_structure_refinement   'SHELXL (Sheldrick, 2015)'     
_computing_molecular_graphics     'SHELXTL (Sheldrick, 2015)'    
_computing_publication_material   'SHELXTL'                      
 
_refine_special_details
;
 ?
;
_refine_ls_structure_factor_coef  Fsqd
_refine_ls_matrix_type            full
_refine_ls_weighting_scheme       calc
_refine_ls_weighting_details
'w=1/[\s^2^(Fo^2^)+(0.09P)^2^+27P] where P=(Fo^2^+2Fc^2^)/3'
_atom_sites_solution_primary      difmap
_atom_sites_solution_secondary    difmap
_atom_sites_solution_hydrogens    mixed
_refine_ls_hydrogen_treatment     constr
_refine_ls_extinction_method      SHELXL
_refine_ls_extinction_coef        0.0059(5)
_refine_ls_extinction_expression
 'Fc^*^=kFc[1+0.001xFc^2^\l^3^/sin(2\q)]^-1/4^'
_refine_ls_number_reflns          2656
_refine_ls_number_parameters      103
_refine_ls_number_restraints      0
_refine_ls_R_factor_all           0.0603
_refine_ls_R_factor_gt            0.0576
_refine_ls_wR_factor_ref          0.1436
_refine_ls_wR_factor_gt           0.1421
_refine_ls_goodness_of_fit_ref    1.014
_refine_ls_restrained_S_all       1.014
_refine_ls_shift/su_max           0.000
_refine_ls_shift/su_mean          0.000
 
loop_
 _atom_site_label
 _atom_site_type_symbol
 _atom_site_fract_x
 _atom_site_fract_y
 _atom_site_fract_z
 _atom_site_U_iso_or_equiv
 _atom_site_adp_type
 _atom_site_occupancy
 _atom_site_site_symmetry_order  
 _atom_site_calc_flag
 _atom_site_refinement_flags_posn
 _atom_site_refinement_flags_adp
 _atom_site_refinement_flags_occupancy
 _atom_site_disorder_assembly
 _atom_site_disorder_group
Pb1 Pb 0.15783(3) 0.39105(2) 0.61258(4) 0.0086(2) Uani 1 1 d . . . . .
Br1 Br 0.46235(9) 0.36034(6) 0.74672(10) 0.0114(2) Uani 1 1 d . . . . .
Br2 Br 0.15290(9) 0.53823(6) 0.38298(11) 0.0131(2) Uani 1 1 d . . . . .
Br3 Br 0.14759(9) 0.26918(6) 0.88169(11) 0.0132(2) Uani 1 1 d . . . . .
S1 S 0.1524(2) 0.60914(13) 0.7766(3) 0.0105(5) Uani 1 1 d . . . . .
O1 O 0.2560(7) 0.5256(5) 0.8001(8) 0.0153(13) Uani 1 1 d . . . . .
C1 C 0.2663(10) 0.7107(7) 0.8163(13) 0.0175(19) Uani 1 1 d . . . . .
H1A H 0.3127 0.7138 0.7396 0.026 Uiso 1 1 calc R U . . .
H1B H 0.3415 0.7072 0.9249 0.026 Uiso 1 1 calc R U . . .
H1C H 0.2068 0.7666 0.8060 0.026 Uiso 1 1 calc R U . . .
C2 C 0.1161(12) 0.6095(7) 0.9529(14) 0.020(2) Uani 1 1 d . . . . .
H2A H 0.0517 0.5572 0.9495 0.030 Uiso 1 1 calc R U . . .
H2B H 0.0687 0.6682 0.9596 0.030 Uiso 1 1 calc R U . . .
H2C H 0.2079 0.6032 1.0466 0.030 Uiso 1 1 calc R U . . .
N1 N 0.4922(9) 0.3975(6) 0.3951(11) 0.0168(17) Uani 1 1 d . . . . .
H1D H 0.5760 0.4290 0.4177 0.020 Uiso 1 1 d R U . . .
H1E H 0.4693 0.3756 0.4747 0.020 Uiso 1 1 d R U . . .
N2 N 0.4290(10) 0.4134(7) 0.1249(11) 0.0202(17) Uani 1 1 d . . . . .
H2D H 0.5107 0.4454 0.1389 0.024 Uiso 1 1 d R U . . .
H2E H 0.3634 0.4014 0.0256 0.024 Uiso 1 1 d R U . . .
C3 C 0.4048(10) 0.3840(6) 0.2480(12) 0.0125(18) Uani 1 1 d . . . . .
H3 H 0.3173 0.3506 0.2282 0.015 Uiso 1 1 calc R U . . .
 
loop_
 _atom_site_aniso_label
 _atom_site_aniso_U_11
 _atom_site_aniso_U_22
 _atom_site_aniso_U_33
 _atom_site_aniso_U_23
 _atom_site_aniso_U_13
 _atom_site_aniso_U_12
Pb1 0.0025(2) 0.0102(3) 0.0135(3) 0.00015(10) 0.00362(17) -0.00002(9)
Br1 0.0030(4) 0.0152(5) 0.0166(5) 0.0002(3) 0.0044(3) 0.0017(3)
Br2 0.0052(4) 0.0160(5) 0.0191(5) 0.0044(3) 0.0060(3) -0.0011(3)
Br3 0.0073(4) 0.0153(4) 0.0169(5) 0.0034(3) 0.0046(3) -0.0030(3)
S1 0.0041(10) 0.0109(10) 0.0166(11) -0.0011(7) 0.0041(8) 0.0008(6)
O1 0.008(3) 0.014(3) 0.020(3) 0.000(2) 0.002(3) 0.005(2)
C1 0.007(4) 0.014(4) 0.029(5) -0.001(4) 0.005(4) -0.006(3)
C2 0.009(5) 0.035(6) 0.018(5) -0.003(4) 0.008(4) -0.001(3)
N1 0.011(4) 0.025(4) 0.016(4) 0.000(3) 0.006(3) 0.001(3)
N2 0.023(4) 0.025(4) 0.014(4) -0.002(3) 0.009(3) 0.001(4)
C3 0.009(4) 0.012(4) 0.018(5) -0.002(3) 0.006(4) -0.001(3)
 
_geom_special_details
;
 All esds (except the esd in the dihedral angle between two l.s. planes)
 are estimated using the full covariance matrix.  The cell esds are taken
 into account individually in the estimation of esds in distances, angles
 and torsion angles; correlations between esds in cell parameters are only
 used when they are defined by crystal symmetry.  An approximate (isotropic)
 treatment of cell esds is used for estimating esds involving l.s. planes.
;
 
loop_
 _geom_bond_atom_site_label_1
 _geom_bond_atom_site_label_2
 _geom_bond_distance
 _geom_bond_site_symmetry_2
 _geom_bond_publ_flag
Pb1 O1 2.508(7) . ?
Pb1 Br1 2.8288(9) . ?
Pb1 Br2 2.9608(10) . ?
Pb1 Br3 3.0477(10) . ?
Pb1 Br3 3.0922(9) 4_565 ?
Br3 Pb1 3.0922(9) 4_566 ?
S1 O1 1.543(6) . ?
S1 C2 1.781(12) . ?
S1 C1 1.796(9) . ?
C1 H1A 0.9800 . ?
C1 H1B 0.9800 . ?
C1 H1C 0.9800 . ?
C2 H2A 0.9800 . ?
C2 H2B 0.9800 . ?
C2 H2C 0.9800 . ?
N1 C3 1.294(14) . ?
N1 H1D 0.9001 . ?
N1 H1E 0.9000 . ?
N2 C3 1.308(14) . ?
N2 H2D 0.9000 . ?
N2 H2E 0.9000 . ?
C3 H3 0.9500 . ?
 
loop_
 _geom_angle_atom_site_label_1
 _geom_angle_atom_site_label_2
 _geom_angle_atom_site_label_3
 _geom_angle
 _geom_angle_site_symmetry_1
 _geom_angle_site_symmetry_3
 _geom_angle_publ_flag
O1 Pb1 Br1 76.15(14) . . ?
O1 Pb1 Br2 79.95(16) . . ?
Br1 Pb1 Br2 97.61(3) . . ?
O1 Pb1 Br3 91.23(17) . . ?
Br1 Pb1 Br3 86.21(3) . . ?
Br2 Pb1 Br3 169.19(3) . . ?
O1 Pb1 Br3 159.35(16) . 4_565 ?
Br1 Pb1 Br3 85.40(3) . 4_565 ?
Br2 Pb1 Br3 93.59(3) . 4_565 ?
Br3 Pb1 Br3 96.805(12) . 4_565 ?
Pb1 Br3 Pb1 166.50(4) . 4_566 ?
O1 S1 C2 103.9(5) . . ?
O1 S1 C1 105.5(4) . . ?
C2 S1 C1 98.9(5) . . ?
S1 O1 Pb1 116.3(3) . . ?
S1 C1 H1A 109.5 . . ?
S1 C1 H1B 109.5 . . ?
H1A C1 H1B 109.5 . . ?
S1 C1 H1C 109.5 . . ?
H1A C1 H1C 109.5 . . ?
H1B C1 H1C 109.5 . . ?
S1 C2 H2A 109.5 . . ?
S1 C2 H2B 109.5 . . ?
H2A C2 H2B 109.5 . . ?
S1 C2 H2C 109.5 . . ?
H2A C2 H2C 109.5 . . ?
H2B C2 H2C 109.5 . . ?
C3 N1 H1D 119.9 . . ?
C3 N1 H1E 120.1 . . ?
H1D N1 H1E 120.0 . . ?
C3 N2 H2D 120.4 . . ?
C3 N2 H2E 119.6 . . ?
H2D N2 H2E 120.0 . . ?
N1 C3 N2 124.3(9) . . ?
N1 C3 H3 117.8 . . ?
N2 C3 H3 117.8 . . ?
 
loop_
 _geom_torsion_atom_site_label_1
 _geom_torsion_atom_site_label_2
 _geom_torsion_atom_site_label_3
 _geom_torsion_atom_site_label_4
 _geom_torsion
 _geom_torsion_site_symmetry_1
 _geom_torsion_site_symmetry_2
 _geom_torsion_site_symmetry_3
 _geom_torsion_site_symmetry_4
 _geom_torsion_publ_flag
C2 S1 O1 Pb1 113.4(5) . . . . ?
C1 S1 O1 Pb1 -143.1(4) . . . . ?
 
loop_
 _geom_hbond_atom_site_label_D 
 _geom_hbond_atom_site_label_H 
 _geom_hbond_atom_site_label_A 
 _geom_hbond_distance_DH 
 _geom_hbond_distance_HA 
 _geom_hbond_distance_DA 
 _geom_hbond_angle_DHA 
 _geom_hbond_site_symmetry_A 
N1 H1D Br2 0.90 2.64 3.442(9)  149 3_666
N1 H1E Br1 0.90 2.52 3.377(10) 160 .
N2 H2D O1  0.90 2.21 3.070(11) 160 3_666
N2 H2E Br3 0.90 2.78 3.491(9)  137 1_554
 
_refine_diff_density_max    4.684
_refine_diff_density_min   -5.220
_refine_diff_density_rms    0.547

_shelxl_version_number 2013-4

_shelx_res_file
;
TITL X in P2(1)/c
CELL  0.79313   9.9840  14.3540   9.1170   90.000  113.216   90.000
ZERR    4.000   0.0009   0.0015   0.0008    0.000    0.010    0.000
LATT  1
SYMM -X, 1/2+Y, 1/2-Z
SFAC C H N O S BR PB
DISP C 0.0047 0.0021 14.6473
DISP H -0 0 0.6283
DISP N 0.0086 0.0042 25.8454
DISP O 0.0148 0.0078 43.6344
DISP S 0.1482 0.1550 759.774
DISP Br -0.8805 2.8944 2206.189
DISP Pb -6.9732 10.4277 21889.318
UNIT 12 44 8 4 4 12 4
TEMP -173.0
SIZE 0.12 0.15 0.18

OMIT    -2   0  10
OMIT    -1   0  10
OMIT     1   0   0
OMIT     2   4   2
OMIT     2   0   2
OMIT     2   0   0
OMIT   -11   9   3
OMIT    10   0   0
OMIT     9   0   0
OMIT     1   1   2
OMIT   -10  11   2
OMIT     8   1   4
L.S. 12
BOND $H
ACTA
CONF
EQIV $1 -x+1, -y+1, -z+1
HTAB N1 Br2_$1
HTAB N1 Br1
HTAB N2 O1_$1
EQIV $2 x, y, z-1
HTAB N2 Br3_$2

WGHT    0.090000   27.000000
EXTI    0.005932
FVAR       0.27862
PB1   7    0.157835    0.391052    0.612584    11.00000    0.00246    0.01015 =
         0.01349    0.00015    0.00362   -0.00002
BR1   6    0.462353    0.360335    0.746715    11.00000    0.00302    0.01524 =
         0.01657    0.00024    0.00440    0.00172
BR2   6    0.152904    0.538230    0.382982    11.00000    0.00523    0.01595 =
         0.01909    0.00438    0.00597   -0.00106
BR3   6    0.147591    0.269177    0.881693    11.00000    0.00730    0.01532 =
         0.01688    0.00339    0.00464   -0.00305
S1    5    0.152431    0.609139    0.776623    11.00000    0.00415    0.01086 =
         0.01658   -0.00105    0.00412    0.00082
O1    4    0.256027    0.525585    0.800067    11.00000    0.00831    0.01370 =
         0.02023   -0.00020    0.00170    0.00519
C1    1    0.266306    0.710725    0.816290    11.00000    0.00689    0.01421 =
         0.02915   -0.00075    0.00466   -0.00575
AFIX 137
H1A   2    0.312727    0.713848    0.739647    11.00000   -1.50000
H1B   2    0.341508    0.707178    0.924879    11.00000   -1.50000
H1C   2    0.206821    0.766582    0.805991    11.00000   -1.50000
AFIX   0
C2    1    0.116107    0.609485    0.952880    11.00000    0.00899    0.03540 =
         0.01796   -0.00277    0.00758   -0.00084
AFIX 137
H2A   2    0.051738    0.557248    0.949462    11.00000   -1.50000
H2B   2    0.068722    0.668195    0.959554    11.00000   -1.50000
H2C   2    0.207878    0.603201    1.046590    11.00000   -1.50000
AFIX   0
N1    3    0.492246    0.397533    0.395080    11.00000    0.01064    0.02487 =
         0.01579   -0.00008    0.00630    0.00091
AFIX   3
H1D   2    0.575995    0.429033    0.417710    11.00000   -1.20000
H1E   2    0.469306    0.375553    0.474700    11.00000   -1.20000
AFIX   0
N2    3    0.429026    0.413400    0.124863    11.00000    0.02306    0.02540 =
         0.01381   -0.00231    0.00915    0.00129
AFIX   3
H2D   2    0.510726    0.445370    0.138913    11.00000   -1.20000
H2E   2    0.363436    0.401420    0.025613    11.00000   -1.20000
AFIX   0
C3    1    0.404833    0.384035    0.248031    11.00000    0.00903    0.01158 =
         0.01798   -0.00185    0.00645   -0.00128
AFIX  43
H3    2    0.317296    0.350585    0.228211    11.00000   -1.20000

AFIX   0
HKLF 4

REM  X in P2(1)/c
REM R1 =  0.0576 for    2598 Fo > 4sig(Fo)  and  0.0603 for all    2656 data
REM    103 parameters refined using      0 restraints

END

WGHT      0.1072     11.7105

REM Highest difference peak  4.684,  deepest hole -5.220,  1-sigma level  0.547
Q1    1   0.0751  0.3906  0.5486  11.00000  0.05    4.68
Q2    1   0.2380  0.3906  0.6797  11.00000  0.05    4.27
Q3    1   0.0386  0.4503  0.5653  11.00000  0.05    4.04
Q4    1   0.2802  0.4506  0.6573  11.00000  0.05    3.85
Q5    1   0.0439  0.3313  0.5550  11.00000  0.05    3.55
Q6    1   0.2646  0.3361  0.6261  11.00000  0.05    3.32
Q7    1   0.1398  0.3501  0.6510  11.00000  0.05    3.31
Q8    1   0.1706  0.4390  0.5788  11.00000  0.05    3.21
Q9    1   0.1398  0.4345  0.6541  11.00000  0.05    3.21
Q10   1   0.1751  0.3441  0.5770  11.00000  0.05    3.14
Q11   1   0.0000  0.5000  0.5000  10.50000  0.05    2.59
Q12   1   0.1998  0.3891  0.7765  11.00000  0.05    2.31
Q13   1   0.1266  0.3932  0.4553  11.00000  0.05    2.30
Q14   1   0.0944  0.3209  0.7446  11.00000  0.05    2.08
Q15   1   0.3378  0.2948  0.6880  11.00000  0.05    2.07
Q16   1   0.5498  0.3598  0.8143  11.00000  0.05    1.98
Q17   1   0.1197  0.4467  0.7604  11.00000  0.05    1.97
Q18   1  -0.0124  0.7718  0.9721  11.00000  0.05    1.97
Q19   1   0.0011  0.5105  0.3625  11.00000  0.05    1.88
Q20   1   0.1616  0.2463  0.8351  11.00000  0.05    1.86
;
_shelx_res_checksum   94873

_shelx_hkl_file
;
   0  -2   0  282.55   31.18
   0  -2   0  311.66   34.34
   0   2   0  302.41   33.39
   0   2   0  240.72   26.57
   0  -3   0    1.76    1.59
   0  -3   0    1.02    1.42
   0   3   0    0.27    1.73
   0   3   0   -0.64    1.49
   0   4   0 4070.78  447.41
   0   4   0 3775.89  415.21
   0  -5   0    1.56    1.83
   0  -5   0    3.19    1.80
   0   5   0    1.02    2.64
   0   5   0    1.36    1.83
   0  -6   0 2917.00  320.68
   0  -6   0 2298.75  252.79
   0   6   0 2245.88  247.03
   0   6   0 2556.02  281.19
   0  -7   0    2.20    2.27
   0  -7   0    1.22    2.54
   0   7   0    1.25    2.95
   0   7   0    2.24    2.54
   0  -8   0 5263.88  578.59
   0   8   0 4040.27  444.36
   0   8   0 3843.68  422.67
   0  -9   0    1.25    2.54
   0  -9   0    2.34    3.25
   0   9   0    6.75    4.41
   0   9   0    2.98    3.19
   0 -10   0  416.57   46.20
   0 -10   0  359.29   39.86
   0  10   0  317.15   35.49
   0  10   0  352.85   39.66
   0 -11   0   -2.91    2.98
   0 -11   0   -1.25    3.22
   0  11   0    3.46    3.73
   0  11   0   -1.08    4.85
   0 -12   0 1877.78  206.59
   0 -12   0 2024.88  222.79
   0  12   0 1829.31  201.47
   0  12   0 2295.02  252.89
   0 -13   0    1.46    2.98
   0 -13   0   -1.29    2.81
   0  13   0    3.05    5.63
   0  13   0    2.30    4.91
   0 -14   0 2243.17  246.75
   0 -14   0 2437.38  268.11
   0  14   0 2471.96  271.97
   0  14   0 2153.34  237.40
   0 -15   0    4.27    2.81
   0 -15   0   -2.47    3.73
   0  15   0    2.20    7.02
   0  15   0    6.64    5.15
   0 -16   0  368.10   40.84
   0 -16   0  318.85   35.52
   0  16   0  386.40   43.05
   0  16   0  321.26   36.84
   0 -17   0    1.29    2.75
   0 -17   0    6.17    3.83
   0  17   0    9.66    4.61
   0  17   0   -1.93    6.95
   0 -18   0  601.63   66.40
   0 -18   0  770.77   84.97
   0  18   0  690.10   76.87
   0  18   0  764.67   84.43
  -1 -18   0 1039.56  114.50
  -1 -18   0  816.19   89.92
   1  17   0  243.16   27.59
   1  17   0  179.24   21.69
  -1 -17   0  190.96   21.42
  -1 -17   0  199.37   22.44
   1  16   0  107.58   12.91
   1  16   0   76.91   11.32
  -1 -16   0   98.50   11.52
  -1 -16   0   91.79   10.98
   1  15   0  223.23   25.46
   1  15   0  146.43   17.69
  -1 -15   0  184.83   20.81
  -1 -15   0  188.29   21.29
   1  14   0 1562.89  172.53
   1  14   0 2351.63  258.82
  -1 -14   0 2048.61  225.37
  -1 -14   0 1958.11  215.40
   1  13   0  145.44   17.25
   1  13   0  108.19   13.66
  -1 -13   0  133.27   15.22
  -1 -13   0  134.90   15.49
   1  12   0  139.85   16.57
   1  12   0  118.67   14.54
  -1 -12   0  150.53   17.08
  -1 -12   0  129.38   14.88
   1  11   0  206.01   23.86
   1  11   0  255.67   28.84
  -1 -11   0  304.85   34.00
  -1 -11   0  234.49   26.27
   1  10   0  600.28   66.43
   1  10   0  571.13   63.52
  -1 -10   0  603.33   66.64
  -1 -10   0  632.48   69.89
   1   9   0   60.57    8.44
   1   9   0   70.98    8.88
  -1  -9   0   80.67    9.56
  -1  -9   0   71.08    8.51
   1   8   0  105.14   12.30
   1   8   0   98.80   12.00
  -1  -8   0  112.26   12.88
  -1  -8   0  115.62   13.25
   1   7   0 4186.02  460.63
   1   7   0 5199.48  571.47
  -1  -7   0 4660.55  512.49
   1   6   0 1194.80  131.55
   1   6   0 1467.99  161.75
  -1  -6   0 1212.08  133.41
  -1  -6   0 1444.60  158.97
   1   5   0  624.68   68.87
   1   5   0  766.70   84.60
  -1  -5   0  781.62   86.13
  -1  -5   0  628.07   69.25
   1   4   0  260.99   28.95
   1   4   0  382.33   42.33
  -1  -4   0  306.65   33.96
  -1  -4   0  396.57   43.83
   1   3   0   65.79    7.63
   1   3   0   95.24   10.91
  -1  -3   0  116.40   13.15
  -1  -3   0  107.62   12.13
   1   2   0   77.82    8.81
   1   2   0   91.45   10.24
  -1  -2   0   82.33    9.29
  -1  -2   0   83.48    9.39
  -1  -1   0 2888.19  317.39
   1   0   0  747.04   82.16
   1   0   0  779.24   85.72
  -1   0   0  684.68   75.35
  -1   0   0  765.01   84.13
  -1   1   0 2472.30  271.74
   1  -2   0   96.63   10.81
   1  -2   0   88.84   10.03
  -1   2   0   92.30   10.30
  -1   2   0  107.92   12.17
   1  -3   0  105.24   11.83
   1  -3   0  120.97   13.63
  -1   3   0  122.36   13.86
  -1   3   0  118.56   13.25
   1  -4   0  426.40   47.11
   1  -4   0  442.67   48.81
  -1   4   0  444.36   49.18
  -1   4   0  418.26   46.20
   1  -5   0  847.71   93.31
   1  -5   0  752.47   82.94
  -1   5   0 1081.93  119.24
  -1   5   0  800.94   88.23
   1  -6   0 1612.04  177.30
   1  -6   0 1343.26  147.85
  -1   6   0 1470.02  161.78
  -1   6   0 1660.85  182.90
   1  -7   0 6334.96  696.20
   1  -7   0 5114.74  562.32
  -1   7   0 5792.64  636.55
  -1   7   0 6558.67  720.94
   1  -8   0  134.66   15.32
   1  -8   0  111.38   12.78
  -1   8   0  139.85   16.47
  -1   8   0  119.14   13.80
   1  -9   0   90.50   10.81
   1  -9   0   80.94    9.69
  -1   9   0   81.89   10.61
  -1   9   0   70.16    8.78
   1 -10   0  747.04   82.43
   1 -10   0  669.42   73.89
  -1  10   0  718.57   79.79
  -1  10   0  689.76   76.30
   1 -11   0  261.23   29.22
   1 -11   0  245.81   27.52
  -1  11   0  263.09   29.73
  -1  11   0  254.18   29.12
   1 -12   0  167.51   18.85
   1 -12   0  159.10   18.20
  -1  12   0  148.43   17.42
  -1  12   0  132.87   16.27
   1 -13   0  153.95   17.63
   1 -13   0  162.15   18.34
  -1  13   0  134.46   16.85
  -1  13   0  148.19   17.29
   1 -14   0 2311.63  254.31
   1 -14   0 2245.20  246.99
  -1  14   0 2028.27  223.64
  -1  14   0 2039.80  224.52
   1 -15   0  200.39   22.51
   1 -15   0  217.37   24.47
  -1  15   0  196.86   23.39
  -1  15   0  180.46   20.78
   1 -16   0  102.46   11.93
   1 -16   0  109.04   12.85
  -1  16   0   94.63   13.29
  -1  16   0  105.31   12.91
   1 -17   0  217.40   24.47
   1 -17   0  238.93   26.68
  -1  17   0  211.64   25.32
  -1  17   0  225.13   25.59
   1 -18   0  974.82  107.35
   1 -18   0  919.23  101.28
  -1  18   0  896.86   99.48
  -1  18   0 1039.90  114.70
   2  18   0  374.54   42.23
   2  18   0  539.95   59.76
  -2 -18   0  417.92   46.23
  -2 -18   0  441.65   48.81
  -2 -17   0  441.65   48.84
  -2 -17   0  389.45   43.18
   2  16   0   69.11    9.39
   2  16   0   49.66    8.64
  -2 -16   0   64.57    7.83
  -2 -16   0   64.71    8.20
   2  15   0  306.41   34.84
   2  15   0  261.19   29.59
  -2 -15   0  227.47   25.46
  -2 -15   0  228.52   25.59
   2  14   0  922.96  102.26
   2  14   0 1255.81  138.49
  -2 -14   0 1094.47  120.56
  -2 -14   0 1136.50  125.21
   2  13   0  342.34   38.67
   2  13   0  436.57   48.61
  -2 -13   0  439.62   48.74
  -2 -13   0  422.33   46.81
   2  12   0   65.18    9.39
   2  12   0   69.93    9.05
  -2 -12   0   58.91    7.32
  -2 -12   0   67.55    8.41
   2  11   0  486.05   53.86
   2  11   0  451.82   50.54
  -2 -11   0  495.54   54.88
  -2 -11   0  418.26   46.33
   2  10   0  517.24   57.66
   2  10   0  585.03   64.71
  -2 -10   0  731.45   80.74
  -2 -10   0  551.47   60.98
   2   9   0  406.06   45.11
   2   9   0  397.93   44.57
  -2  -9   0  402.67   44.64
  -2  -9   0  430.47   47.69
   2   8   0    8.98    4.27
   2   8   0   19.15    3.83
  -2  -8   0   13.02    3.02
  -2  -8   0   11.73    3.36
   2   7   0 4752.07  522.66
   2   7   0 3755.56  412.84
  -2  -7   0 5362.18  589.43
  -2  -7   0 4294.49  472.16
   2   6   0  485.71   53.93
   2   6   0  403.69   44.64
  -2  -6   0  550.45   60.84
  -2  -6   0  448.43   49.55
   2   5   0    6.03    2.34
   2   5   0   11.86    3.19
  -2  -5   0    7.36    2.20
  -2  -5   0   11.59    2.88
   2   4   0  591.81   65.38
   2   4   0  523.34   57.76
  -2  -4   0  743.32   81.92
  -2  -4   0  612.14   67.52
   2   3   0  486.73   53.72
   2   3   0  516.56   57.08
  -2  -3   0  504.36   55.66
  -2  -3   0  515.20   56.88
   2   2   0  110.90   12.61
   2   2   0  152.73   17.05
  -2  -2   0   96.33   10.95
  -2  -2   0  112.90   12.78
   2   1   0 1472.73  161.98
   2   1   0 1242.25  136.73
  -2  -1   0 1094.47  120.43
  -2  -1   0 1444.94  158.93
   2   0   0  361.66   40.00
   2   0   0  365.05   40.33
  -2   0   0  438.60   48.40
  -2   0   0  440.29   48.61
   2  -1   0 1104.64  121.55
   2  -1   0 1070.40  117.82
  -2   1   0 1012.78  111.45
  -2   1   0 1249.03  137.44
   2  -2   0  107.96   12.24
   2  -2   0   98.87   11.29
  -2   2   0  111.82   12.74
  -2   2   0   94.40   10.68
   2  -3   0  530.46   58.50
   2  -3   0  559.27   61.72
  -2   3   0  583.33   64.47
  -2   3   0  572.15   63.08
   2  -4   0  751.11   82.74
   2  -4   0  704.00   77.62
  -2   4   0  770.43   85.08
  -2   4   0  712.81   78.50
   2  -5   0    6.34    2.34
   2  -5   0    8.95    2.68
  -2   5   0    6.24    3.53
  -2   5   0   10.54    2.95
   2  -6   0  666.37   73.52
   2  -6   0  595.19   65.69
  -2   6   0  670.10   74.23
  -2   6   0  710.44   78.37
   2  -7   0 5321.50  584.69
   2  -7   0 6236.66  685.36
  -2   7   0 6345.13  697.56
  -2   7   0 5782.47  635.53
   2  -8   0   11.93    3.39
   2  -8   0   10.88    3.02
  -2   8   0   16.71    5.19
  -2   8   0   16.17    3.59
   2  -9   0  478.60   53.01
   2  -9   0  494.19   54.71
  -2   9   0  438.26   48.67
  -2   9   0  461.65   51.55
   2 -10   0  618.58   68.40
   2 -10   0  848.73   93.65
  -2  10   0  615.87   68.20
  -2  10   0  634.85   70.64
   2 -11   0  519.95   57.55
   2 -11   0  571.13   63.18
  -2  11   0  547.74   61.15
  -2  11   0  561.98   62.37
   2 -12   0   77.28    9.29
   2 -12   0   82.26   10.30
  -2  12   0   95.48   11.96
  -2  12   0   76.16   10.98
   2 -13   0  521.98   57.82
   2 -13   0  460.63   51.01
  -2  13   0  510.46   57.28
  -2  13   0  490.80   54.54
   2 -14   0 1152.43  126.94
   2 -14   0 1629.33  179.41
  -2  15   0  387.76   43.89
  -2  15   0  278.75   31.45
   2 -16   0   70.60    8.51
   2 -16   0   74.47    9.29
  -2  16   0   74.50   11.39
  -2  16   0   59.93    8.20
   2 -17   0  431.82   47.86
   2 -17   0  440.63   48.77
  -2  17   0  383.01   42.74
  -2  17   0  514.52   57.76
   2 -18   0  456.23   50.47
   2 -18   0  457.92   50.57
  -2  18   0  445.72   49.89
  -2  18   0  477.24   53.01
   3  17   0    2.10    6.03
   3  17   0   15.46    4.58
  -3 -17   0    4.20    2.85
  -3 -17   0    3.25    3.19
   3  16   0  213.47   24.17
   3  16   0  180.39   21.35
  -3 -16   0  179.64   20.24
  -3 -16   0  197.61   22.24
   3  15   0   50.88    8.34
   3  15   0   59.89    7.86
  -3 -15   0   64.87    8.00
  -3 -15   0   59.86    7.42
   3  14   0 2110.98  232.65
   3  14   0 2117.42  233.03
  -3 -14   0 2037.76  224.18
  -3 -14   0 2392.64  263.16
   3  13   0   49.01    6.88
   3  13   0   38.71    7.25
  -3 -13   0   43.93    6.03
  -3 -13   0   36.17    5.15
  -3 -12   0 1260.55  138.87
  -3 -12   0 1048.03  115.48
   3  11   0    9.39    3.76
   3  11   0   23.25    6.44
  -3 -11   0   20.40    4.10
  -3 -11   0   18.91    3.63
   3  10   0  265.33   29.73
   3  10   0  234.89   26.91
  -3 -10   0  273.87   30.61
  -3 -10   0  358.27   39.86
   3   9   0  177.47   20.17
   3   9   0  139.65   16.51
  -3  -9   0  173.75   19.73
  -3  -9   0  129.34   14.81
   3   8   0 2885.81  317.39
   3   8   0 2510.94  276.48
  -3  -8   0 3775.89  414.87
  -3  -8   0 3060.37  336.51
   3   7   0  319.66   35.89
   3   7   0  324.81   36.13
  -3  -7   0  350.81   38.95
  -3  -7   0  370.47   41.15
   3   6   0 2308.58  254.11
   3   6   0 2076.40  228.42
  -3  -6   0 2129.28  234.28
  -3  -6   0 2144.53  235.94
   3   5   0   95.18   11.02
   3   5   0  121.48   14.17
  -3  -5   0  147.65   16.71
  -3  -5   0  146.02   16.61
   3   4   0 4277.54  470.46
   3   4   0 3880.97  426.74
  -3  -4   0 3436.94  377.93
  -3  -4   0 3180.36  349.80
   3   3   0   43.25    5.46
   3   3   0   48.94    6.30
  -3  -3   0   56.50    6.98
  -3  -3   0   60.06    7.29
   3   2   0  174.76   19.52
   3   2   0  184.18   20.74
  -3  -2   0  193.30   21.62
  -3  -2   0  209.06   23.35
   3   1   0  913.13  100.67
   3   1   0 1145.65  126.09
  -3  -1   0 1222.25  134.56
  -3  -1   0  953.13  104.94
   3  -1   0 1029.05  113.34
   3  -1   0  994.82  109.55
  -3   1   0 1066.33  117.45
  -3   1   0  923.30  101.65
   3  -2   0  169.92   19.05
   3  -2   0  179.61   20.17
  -3   2   0  182.76   20.40
  -3   2   0  204.96   22.95
   3  -3   0   54.64    6.85
   3  -3   0   50.20    6.30
  -3   3   0   55.32    6.81
  -3   3   0   65.08    8.00
   3  -4   0 4318.21  474.53
   3  -4   0 3809.79  418.94
  -3   4   0 4057.22  446.06
  -3   4   0 3901.30  429.11
  -3   5   0  164.09   18.51
  -3   5   0  187.57   21.46
   3  -6   0 2895.98  318.44
   3  -6   0 3826.74  420.64
  -3   6   0 3111.89  342.34
  -3   6   0 2782.09  305.94
   3  -7   0  452.16   50.13
   3  -7   0  356.91   39.69
  -3   7   0  454.87   50.77
  -3   7   0  483.68   53.59
   3  -8   0 4619.88  507.75
   3  -8   0 4741.90  521.30
  -3   8   0 4752.07  522.32
  -3   8   0 4463.96  490.80
   3  -9   0  166.86   18.98
   3  -9   0  174.76   19.96
  -3   9   0  174.63   20.64
  -3   9   0  213.20   24.10
   3 -10   0  396.23   44.03
   3 -10   0  379.62   42.23
  -3  10   0  363.69   41.08
  -3  10   0  380.98   42.47
   3 -11   0   24.44    4.34
   3 -11   0   24.00    4.85
  -3  11   0   17.15    4.47
  -3  11   0   26.57    6.51
   3 -12   0 1520.53  167.47
   3 -12   0 1340.54  147.65
  -3  12   0 1457.82  160.63
  -3  12   0 1365.97  150.87
   3 -13   0   58.60    7.42
   3 -13   0   43.45    6.85
  -3  13   0   34.71    6.07
  -3  13   0   35.45    7.59
  -3  14   0 2355.02  259.43
  -3  14   0 2566.86  282.51
   3 -15   0   80.47   10.07
   3 -15   0   76.16    9.19
  -3  15   0   74.09    9.66
  -3  15   0   80.81   11.93
   3 -16   0  213.88   24.23
   3 -16   0  206.93   23.15
  -3  16   0  218.55   24.81
  -3  16   0  230.38   26.88
   3 -17   0    8.10    4.03
   3 -17   0   12.10    3.22
  -3  17   0    5.49    7.36
  -3  17   0    5.05    4.30
   4  17   0   77.11   10.54
   4  17   0   45.22    6.61
  -4 -17   0   52.64    6.58
  -4 -17   0   46.13    6.03
   4  16   0   99.41   12.95
   4  16   0   88.13   10.85
  -4 -16   0   75.79    9.08
  -4 -16   0   78.60    9.39
   4  15   0   67.48    8.71
   4  15   0   45.72    7.83
  -4 -15   0   36.03    5.29
  -4 -15   0   40.00    5.63
   4  14   0 2074.03  228.21
   4  14   0 2155.04  237.54
  -4 -14   0 1806.26  198.76
  -4 -14   0 2025.56  222.86
   4  13   0   29.90    6.47
   4  13   0   15.46    4.30
  -4 -12   0  309.53   34.51
  -4 -12   0  254.82   28.51
   4  11   0  346.07   39.05
   4  11   0  250.92   28.20
  -4 -11   0  251.30   28.10
  -4 -11   0  324.10   36.13
   4  10   0  536.22   59.72
   4  10   0  761.62   84.19
  -4 -10   0  609.09   67.35
  -4 -10   0  517.91   57.35
   4   9   0   20.64    5.46
   4   9   0   20.20    4.27
  -4  -9   0   25.08    4.24
  -4  -9   0   23.56    4.27
   4   8   0  529.10   58.91
   4   8   0  553.84   61.32
  -4  -8   0  603.33   66.67
  -4  -8   0  626.72   69.32
   4   7   0 3511.51  386.40
   4   7   0 3114.94  342.68
  -4  -7   0 3616.59  397.59
  -4  -7   0 3786.06  416.57
   4   6   0 2159.78  237.84
   4   6   0 2022.17  222.45
  -4  -6   0 2048.95  225.44
  -4  -6   0 2455.69  270.14
   4   5   0 1022.27  112.90
   4   5   0  957.19  105.48
  -4  -5   0 1072.10  118.12
  -4  -5   0 1006.34  110.90
   4   4   0   89.58   10.58
   4   4   0   89.58   10.81
  -4  -4   0   88.30   10.54
  -4  -4   0   99.79   11.69
   4   3   0  704.68   77.75
   4   3   0  646.04   71.48
  -4  -3   0  652.48   72.06
  -4  -3   0  753.48   83.14
   4   2   0   43.76    5.90
   4   2   0   49.22    6.17
  -4  -2   0   48.54    6.20
  -4  -2   0   41.62    5.59
   4   1   0 2710.58  298.07
   4   1   0 2133.68  234.79
  -4  -1   0 2264.52  249.09
  -4  -1   0 2826.50  310.82
   4   0   0 4667.33  513.17
   4   0   0 5060.51  556.22
   4  -1   0 2495.00  274.41
   4  -1   0 3036.65  334.00
  -4   1   0 2714.64  298.61
  -4   1   0 2814.29  309.49
   4  -2   0   46.88    6.17
   4  -2   0   47.49    6.03
  -4   2   0   47.66    6.30
  -4   2   0   61.18    7.69
   4  -3   0  719.59   79.42
   4  -3   0  734.84   81.11
  -4   3   0  864.32   95.41
  -4   3   0  717.56   79.21
   4  -4   0   90.60   10.78
   4  -4   0  107.35   12.64
  -4   4   0  127.58   14.85
  -4   4   0  115.31   13.42
   4  -5   0 1245.64  137.24
   4  -5   0 1381.90  152.22
  -4   5   0 1283.94  141.55
  -4   5   0 1318.51  145.24
   4  -6   0 3313.91  364.37
   4  -6   0 3894.53  428.09
  -4   6   0 2772.94  305.12
  -4   6   0 2691.93  296.07
   4  -7   0 5155.42  566.72
   4  -7   0 5277.44  579.94
  -4   7   0 5935.00  652.48
  -4   7   0 4735.12  520.63
   4  -8   0 1063.96  117.38
   4  -8   0  752.47   83.14
  -4   8   0  722.98   79.89
  -4   8   0  784.33   86.91
   4  -9   0   31.05    5.02
   4  -9   0   34.27    5.63
  -4   9   0   33.35    5.80
  -4   9   0   34.06    6.88
   4 -10   0  571.47   63.28
   4 -10   0  718.23   79.38
  -4  10   0  677.22   75.35
  -4  10   0  787.38   87.01
   4 -11   0  384.37   42.67
   4 -11   0  382.00   42.57
  -4  11   0  394.20   44.44
  -4  11   0  407.42   45.42
   4 -12   0  359.63   40.00
   4 -12   0  359.29   40.13
  -4  12   0  365.05   40.78
  -4  12   0  392.50   44.20
   4 -13   0   29.56    4.75
   4 -13   0   15.22    4.95
  -4  13   0   15.86    5.19
  -4  13   0   20.81    7.05
   4 -14   0 2349.26  258.45
   4 -14   0 2328.92  256.18
  -4  14   0 2723.46  299.97
  -4  14   0 2369.93  260.86
   4 -15   0   46.00    6.68
   4 -15   0   61.79    7.73
  -4  15   0   50.98    7.42
  -4  15   0   59.18    9.73
   4 -16   0  108.94   12.54
   4 -16   0  104.33   12.51
  -4  16   0   91.21   11.32
  -4  16   0  131.61   16.47
   4 -17   0   56.88    7.32
   4 -17   0   63.55    7.90
  -4  17   0   55.99    7.90
  -4  17   0   60.37    9.69
   5  16   0    0.41    4.95
   5  16   0   -5.05    4.00
  -5 -16   0    1.05    2.58
  -5 -16   0   -2.37    2.58
   5  15   0  290.21   32.40
   5  15   0  404.71   45.49
  -5 -15   0  287.53   32.00
  -5 -15   0  274.85   30.61
   5  14   0  220.11   24.81
   5  14   0  257.57   29.52
  -5 -14   0  195.64   22.00
  -5 -14   0  225.10   25.25
   5  13   0  820.60   91.04
   5  13   0  625.70   69.21
  -5 -13   0  680.61   75.15
  -5 -13   0  606.04   66.94
   5  12   0   14.37    5.32
   5  12   0    2.30    3.86
  -5 -12   0    2.61    2.91
  -5 -12   0    4.03    2.95
   5  11   0  694.51   77.11
   5  11   0  713.15   78.84
  -5 -11   0  632.14   69.89
  -5 -11   0  701.62   77.52
  -5 -10   0  131.82   15.25
  -5 -10   0  124.22   14.24
   5   9   0  542.32   60.40
   5   9   0  587.06   64.94
  -5  -9   0  573.50   63.42
  -5  -9   0  650.10   71.89
   5   8   0    5.80    3.02
   5   8   0    7.29    4.44
  -5  -8   0    9.69    3.25
  -5  -8   0    9.73    3.49
   5   7   0 3880.97  426.74
   5   7   0 3914.86  430.80
  -5  -7   0 4870.70  535.54
  -5  -7   0 4738.51  520.96
   5   6   0  119.41   14.34
   5   6   0  140.83   16.24
  -5  -6   0  144.90   16.71
  -5  -6   0  134.50   15.52
   5   5   0   77.55    9.93
   5   5   0   77.55    9.42
  -5  -5   0   73.04    9.08
  -5  -5   0   89.28   10.64
   5   4   0   28.20    4.47
   5   4   0   30.47    5.36
  -5  -4   0   48.37    6.58
  -5  -4   0   30.00    4.78
   5   3   0   94.57   11.46
   5   3   0  124.26   14.27
  -5  -3   0  117.31   13.52
  -5  -3   0  100.80   11.80
   5   2   0   61.25    7.90
   5   2   0   75.08    9.05
  -5  -2   0   59.55    7.39
  -5  -2   0   72.74    8.85
   5   1   0  925.33  102.06
   5   1   0  815.51   90.09
  -5  -1   0 1026.00  113.11
  -5  -1   0 1071.76  118.12
   5   0   0   16.98    3.86
   5   0   0   14.07    3.66
  -5   0   0   13.86    3.93
  -5   0   0   23.08    4.03
   5  -1   0 1014.47  111.85
   5  -1   0  982.95  108.46
  -5   1   0  812.12   89.65
  -5   1   0 1107.35  122.09
   5  -2   0   75.11    9.12
   5  -2   0   71.31    9.02
  -5   2   0   76.23    9.52
  -5   2   0   77.45    9.56
   5  -3   0  139.92   16.13
   5  -3   0  135.21   15.76
  -5   3   0  155.17   17.86
  -5   3   0  126.46   14.64
   5  -4   0   38.71    5.86
   5  -4   0   26.74    4.81
  -5   4   0   35.35    5.52
  -5   4   0   38.40    5.90
   5  -5   0   95.89   11.63
   5  -5   0   97.89   11.76
  -5   5   0  101.41   12.17
  -5   5   0  109.79   13.22
   5  -6   0  139.21   16.20
   5  -6   0  182.22   20.98
  -5   6   0  185.20   21.39
  -5   6   0  170.83   19.66
   5  -7   0 6182.43  679.59
   5  -7   0 5067.29  556.89
  -5   7   0 5921.44  651.12
  -5   7   0 5894.33  647.73
   5  -8   0   11.46    4.58
   5  -8   0    7.05    4.10
  -5   8   0   10.54    4.95
  -5   8   0    4.98    4.98
   5  -9   0  830.43   91.72
   5  -9   0  829.75   91.65
  -5   9   0  788.73   87.35
  -5   9   0  852.12   94.09
   5 -10   0  193.40   22.07
   5 -10   0  216.86   24.54
  -5  10   0  194.66   22.40
  -5  10   0  200.69   23.25
   5 -11   0  843.98   93.14
   5 -11   0  944.65  104.29
  -5  11   0  903.64   99.85
  -5  11   0  839.92   92.97
   5 -12   0    0.07    3.05
   5 -12   0    1.90    4.51
  -5  12   0    6.20    5.52
  -5  12   0    4.37    4.61
   5 -13   0  791.11   87.28
   5 -13   0  840.59   92.80
  -5  13   0  808.05   89.35
  -5  13   0  894.49   99.04
   5 -14   0  259.60   29.08
   5 -14   0  283.73   31.79
  -5  14   0  269.40   30.37
  -5  14   0  271.67   30.98
   5 -15   0  332.41   37.08
   5 -15   0  321.83   35.79
  -5  15   0  406.06   45.52
  -5  15   0  331.29   37.15
   5 -16   0    3.56    4.03
   5 -16   0    0.14    2.98
  -5  16   0    3.63    4.10
  -5  16   0    0.68    5.90
   6  16   0   40.54    6.07
   6  16   0   57.59    9.02
  -6 -16   0   35.39    4.95
  -6 -16   0   53.66    6.68
   6  15   0   34.23    5.56
   6  15   0   55.42    8.68
  -6 -15   0   43.35    5.76
  -6 -15   0   34.67    4.98
  -6 -14   0 1702.20  187.30
  -6 -14   0 1511.04  166.29
   6  13   0   68.47    8.68
   6  13   0   70.94   10.07
  -6 -13   0   66.06    8.24
  -6 -13   0   58.06    7.36
   6  12   0  621.63   69.18
   6  12   0  479.27   53.08
  -6 -12   0  458.60   50.81
  -6 -12   0  545.71   60.37
   6  11   0   21.22    5.32
   6  11   0    9.69    3.46
  -6 -11   0   18.24    3.73
  -6 -11   0   15.46    3.73
   6  10   0  369.79   41.15
   6  10   0  369.45   41.59
  -6 -10   0  358.61   39.83
  -6 -10   0  384.03   42.71
   6   9   0  161.71   18.37
   6   9   0  196.73   22.91
  -6  -9   0  163.14   18.54
  -6  -9   0  160.42   18.37
   6   8   0 1328.68  146.29
   6   8   0 1440.53  159.00
  -6  -8   0 1356.47  149.41
  -6  -8   0 1539.85  169.61
   6   7   0  853.14   94.47
   6   7   0  870.42   96.02
  -6  -7   0  863.98   95.31
  -6  -7   0  879.57   97.11
   6   6   0 1279.53  141.24
   6   6   0 1531.37  168.63
  -6  -6   0 1404.61  154.70
  -6  -6   0 1445.62  159.20
   6   5   0  438.60   48.71
   6   5   0  458.60   51.28
  -6  -5   0  433.18   48.16
  -6  -5   0  458.26   50.81
   6   4   0 1174.80  129.51
   6   4   0  907.71  100.46
  -6  -4   0  846.70   93.52
  -6  -4   0 1045.32  115.28
   6   3   0    5.25    3.02
   6   3   0    9.49    4.24
   6   2   0  111.92   13.15
   6   2   0   84.81   10.78
  -6  -2   0  101.85   12.07
  -6  -2   0   99.65   12.03
   6   1   0 1375.46  151.51
   6   1   0 1310.04  144.49
  -6  -1   0 1614.08  177.74
  -6  -1   0 1651.36  181.85
   6  -1   0 1714.74  188.93
   6  -1   0 1696.10  186.79
  -6   1   0 2027.93  223.27
  -6   1   0 1765.59  194.35
   6  -2   0  110.63   13.15
   6  -2   0  107.21   12.98
  -6   2   0  124.22   14.54
  -6   2   0  103.75   12.44
   6  -3   0   11.39    3.90
   6  -3   0    9.56    4.17
  -6   3   0    8.37    3.90
  -6   3   0   15.93    4.54
   6  -4   0 1328.34  146.43
   6  -4   0 1207.34  133.14
  -6   4   0 1069.05  117.95
  -6   4   0 1158.19  127.78
   6  -5   0  580.62   64.40
   6  -5   0  597.91   66.30
  -6   5   0  576.55   63.96
  -6   5   0  564.01   62.67
   6  -6   0 2014.04  221.77
   6  -6   0 1866.93  205.54
  -6   6   0 1927.60  212.28
  -6   6   0 1777.45  195.74
   6  -7   0 1288.35  141.95
   6  -7   0 1182.25  130.36
  -6   7   0 1325.29  146.09
  -6   7   0 1344.95  148.29
   6  -8   0 2459.75  270.68
   6  -8   0 2000.48  220.25
  -6   8   0 1966.24  216.49
  -6   8   0 2076.74  228.72
   6  -9   0  237.71   26.84
   6  -9   0  262.21   29.49
  -6   9   0  215.61   24.51
  -6   9   0  220.45   25.29
   6 -10   0  532.15   58.94
   6 -10   0  587.40   65.08
  -6  10   0  579.26   64.40
  -6  10   0  565.71   62.81
   6 -11   0   24.27    4.44
   6 -11   0   15.05    4.91
  -6  11   0    6.88    5.25
  -6  11   0   14.00    4.68
  -6  12   0  759.25   84.03
  -6  12   0  730.77   81.01
   6 -13   0   58.67    7.56
   6 -13   0   74.57    9.63
  -6  13   0   81.62   10.71
  -6  13   0   77.62    9.80
   6 -14   0 2157.41  237.30
   6 -14   0 2170.97  238.82
  -6  14   0 1994.38  219.54
  -6  14   0 2000.48  220.28
   6 -15   0   42.54    6.00
   6 -15   0   38.54    5.73
  -6  15   0   43.69    7.02
  -6  15   0   42.98    6.98
   6 -16   0   65.42    8.03
   6 -16   0   65.32    8.24
  -6  16   0   65.79    8.88
  -6  16   0   45.32    7.05
   7  15   0   12.20    5.76
  -7 -15   0    4.37    2.98
   7  14   0 1234.11  136.26
   7  14   0 1000.58  110.29
  -7 -14   0 1021.25  112.53
  -7 -14   0 1104.30  121.58
   7  13   0    3.25    5.12
   7  13   0   -2.41    3.19
  -7 -13   0    2.34    2.75
  -7 -13   0    1.80    2.98
   7  12   0  527.74   58.84
   7  12   0  428.09   47.49
  -7 -12   0  413.52   45.86
  -7 -12   0  492.15   54.47
   7  11   0  176.63   20.07
   7  11   0  192.66   22.51
  -7 -11   0  169.98   19.22
  -7 -11   0  202.08   22.78
   7  10   0  236.86   27.12
   7  10   0  215.33   24.23
  -7 -10   0  257.97   28.95
  -7 -10   0  238.59   26.71
   7   9   0  114.63   14.20
   7   9   0  105.68   12.44
  -7  -9   0  109.18   12.74
  -7  -9   0  112.50   13.22
   7   8   0  878.56   97.24
   7   8   0  923.30  101.85
  -7  -8   0  904.99   99.85
  -7  -8   0  884.66   97.62
  -7  -7   0  944.31  104.16
  -7  -7   0  966.68  106.57
   7   6   0 1040.91  114.77
   7   6   0  950.75  105.11
  -7  -6   0  928.72  102.50
  -7  -6   0 1009.73  111.31
   7   5   0  708.06   78.26
   7   5   0  590.45   65.65
   7   4   0  221.71   25.42
   7   4   0  287.23   32.10
  -7  -4   0  212.35   23.93
  -7  -4   0  217.37   24.54
   7   3   0  573.16   63.79
   7   3   0  558.59   61.86
  -7  -3   0  622.31   68.91
  -7  -3   0  602.65   66.71
   7   2   0   57.89    7.36
   7   2   0   49.93    7.46
  -7  -2   0   59.25    7.56
  -7  -2   0   80.26   10.07
   7   1   0 1686.95  185.78
   7   1   0 1658.82  182.80
  -7  -1   0 2016.75  221.94
  -7  -1   0 1872.69  206.15
   7   0   0 9405.84 1033.79
   7  -1   0 1945.91  214.32
   7  -1   0 2154.02  237.06
  -7   1   0 2419.08  266.21
  -7   1   0 2053.35  226.05
   7  -2   0   76.03   10.03
   7  -2   0   69.76    9.32
  -7   2   0   80.23   10.10
  -7   2   0   83.42   10.85
   7  -3   0  837.54   92.57
   7  -3   0  875.51   96.74
  -7   3   0  709.42   78.57
  -7   3   0  737.55   81.59
   7  -4   0  301.66   33.83
   7  -4   0  340.98   38.10
  -7   4   0  345.05   38.61
  -7   4   0  266.08   30.00
   7  -5   0  953.46  105.24
   7  -5   0  880.59   97.28
  -7   5   0  857.88   94.84
  -7   5   0  901.27   99.62
   7  -6   0 1722.88  189.74
   7  -6   0 1499.17  165.17
  -7   6   0 1520.19  167.54
  -7   6   0 1654.07  182.29
   7  -7   0 1646.61  181.41
   7  -7   0 1631.70  179.71
  -7   7   0 1610.01  177.37
  -7   7   0 1715.42  188.96
   7  -8   0 1406.30  154.93
   7  -8   0 1326.65  146.22
  -7   8   0 1277.84  140.90
  -7   8   0 1318.51  145.41
   7  -9   0  151.98   17.56
   7  -9   0  172.90   19.83
  -7   9   0  169.51   19.73
  -7   9   0  176.80   20.68
   7 -10   0  537.91   59.62
   7 -10   0  364.71   40.67
  -7  10   0  371.15   41.56
  -7  10   0  386.40   43.35
   7 -11   0  272.18   30.51
   7 -11   0  262.31   29.52
  -7  11   0  260.52   29.56
  -7  11   0  295.46   33.28
  -7  12   0  672.14   74.53
  -7  12   0  588.08   65.18
   7 -13   0    5.86    3.76
   7 -13   0    1.93    3.05
   7 -14   0 1430.03  157.44
   7 -14   0 1305.63  143.75
  -7  14   0 1278.86  140.90
  -7  14   0 1446.97  159.44
   7 -15   0   14.20    3.63
  -7  15   0    1.05    4.58
   8  13   0  472.50   52.71
   8  13   0  475.55   52.60
  -8 -13   0  442.33   48.94
  -8 -13   0  412.84   45.69
   8  12   0    8.27    3.73
   8  12   0   12.54    5.49
  -8 -12   0    6.85    3.12
  -8 -12   0    5.19    3.15
   8  11   0  351.15   39.49
   8  11   0  344.71   38.40
  -8 -11   0  382.33   42.50
  -8 -11   0  360.64   40.03
   8  10   0    3.22    5.39
   8  10   0    0.34    3.25
  -8 -10   0   -1.36    3.02
  -8 -10   0    5.32    3.36
   8   9   0  457.24   50.67
   8   9   0  534.86   59.82
  -8  -9   0  430.47   47.72
  -8  -9   0  508.42   56.37
   8   8   0    8.27    3.46
   8   8   0    3.69    5.15
  -8  -8   0   11.32    3.42
  -8  -8   0    4.51    3.36
   8   7   0 2799.38  308.27
   8   7   0 3022.75  332.44
  -8  -7   0 2740.74  301.39
  -8  -7   0 2805.48  308.58
   8   6   0   27.96    5.86
   8   6   0   43.66    6.07
  -8  -6   0   28.95    4.78
  -8  -6   0   30.88    4.61
   8   5   0   11.05    3.59
   8   5   0    3.66    4.58
  -8  -5   0    0.37    3.36
  -8  -5   0    4.64    3.22
   8   4   0  237.60   27.42
   8   4   0  239.81   26.98
  -8  -4   0  240.25   26.98
  -8  -4   0  255.47   28.78
   8   3   0   17.79    5.66
   8   3   0   21.32    4.24
  -8  -3   0   25.08    5.32
  -8  -3   0   18.81    4.14
   8   2   0   11.35    3.63
   8   2   0   22.44    5.76
  -8  -2   0   12.44    4.00
  -8  -2   0   16.07    3.80
   8   1   0  715.86   79.38
   8   1   0  781.28   86.33
  -8  -1   0  858.56   94.70
  -8  -1   0  738.91   81.65
   8   0   0   85.11   10.64
   8   0   0   68.81    9.22
  -8   0   0   87.96   10.58
  -8   0   0   81.72   10.20
   8  -1   0  821.95   90.80
   8  -1   0  766.36   84.77
  -8   1   0  760.60   84.03
  -8   1   0  832.12   91.86
   8  -2   0    5.63    3.83
   8  -2   0    5.93    3.97
  -8   2   0    8.47    3.53
  -8   2   0   13.22    4.24
   8  -3   0   27.83    5.42
   8  -3   0   18.71    4.37
  -8   3   0   26.13    5.25
  -8   3   0   29.05    5.39
   8  -4   0  344.03   38.47
   8  -4   0  310.17   34.78
  -8   4   0  329.97   37.05
  -8   4   0  318.44   35.69
   8  -5   0    4.68    3.83
   8  -5   0    3.73    4.00
  -8   5   0    2.10    3.86
  -8   5   0    2.03    4.47
   8  -6   0   50.71    7.39
   8  -6   0   41.93    6.58
  -8   6   0   48.40    7.42
  -8   6   0   48.67    7.42
   8  -7   0 4762.24  523.68
   8  -7   0 4369.05  480.29
  -8   7   0 4277.54  470.46
  -8   7   0 5799.42  637.56
   8  -8   0    4.24    3.93
   8  -8   0    3.83    4.37
  -8   8   0    8.30    4.85
  -8   8   0    2.98    4.98
   8  -9   0  750.09   82.91
   8  -9   0  717.22   79.28
  -8   9   0  688.41   76.16
  -8   9   0  704.34   78.09
   8 -10   0    7.22    3.83
   8 -10   0   10.41    4.71
  -8  10   0   -0.44    4.54
  -8  10   0    5.56    4.81
   8 -11   0  613.16   67.79
   8 -11   0  555.20   61.45
  -8  11   0  567.74   62.98
  -8  11   0  602.65   66.87
   8 -12   0   15.29    4.10
   8 -12   0   24.64    4.85
  -8  12   0    1.49    4.64
  -8  12   0   15.15    4.81
   8 -13   0  584.01   64.54
   8 -13   0  596.89   65.89
  -8  13   0  614.51   67.99
  -8  13   0  549.44   60.88
   9  12   0  180.73   20.91
   9  12   0  165.61   18.71
  -9 -12   0  156.32   17.73
  -9 -12   0  155.58   17.59
   9  11   0   10.44    3.39
   9  11   0    5.76    5.46
  -9 -11   0    3.69    2.78
  -9 -11   0    6.34    3.19
  -9 -10   0  652.82   72.13
  -9 -10   0  525.37   58.10
   9   9   0   45.89    6.24
   9   9   0   47.66    7.73
  -9  -9   0   44.71    6.44
  -9  -9   0   38.88    5.59
   9   8   0  344.37   38.84
   9   8   0  376.57   41.89
  -9  -8   0  247.94   27.66
  -9  -8   0  343.36   38.20
   9   7   0  977.53  108.23
   9   7   0 1023.97  112.94
  -9  -7   0 1028.03  113.38
  -9  -7   0  845.68   93.31
   9   6   0  891.44   98.40
   9   6   0  688.07   76.40
  -9  -6   0  753.82   83.14
  -9  -6   0  784.67   86.67
   9   5   0  341.32   38.10
   9   5   0  320.58   36.17
  -9  -5   0  359.29   40.10
  -9  -5   0  306.51   34.13
   9   4   0  264.38   29.69
   9   4   0  297.33   33.76
  -9  -4   0  346.41   38.67
  -9  -4   0  314.92   35.15
   9   3   0   15.96    3.83
   9   3   0   16.47    6.00
  -9  -3   0   19.52    4.24
  -9  -3   0   20.98    4.75
   9   2   0  261.70   29.83
   9   2   0  245.26   27.62
  -9  -2   0  279.26   31.32
  -9  -2   0  265.40   29.73
   9   1   0 1358.51  149.71
   9   1   0 1375.79  151.78
  -9  -1   0 1547.30  170.36
  -9  -1   0 1358.17  149.65
   9   0   0 4399.56  483.68
   9   0   0 4802.91  528.08
  -9   0   0 4874.09  535.88
  -9   0   0 4687.67  515.20
   9  -1   0 1311.73  144.60
   9  -1   0 1435.11  158.15
  -9   1   0 1431.38  157.65
  -9   1   0 1436.81  158.29
   9  -2   0  264.52   29.83
   9  -2   0  287.56   32.27
  -9   2   0  265.36   29.76
  -9   2   0  290.11   32.57
   9  -3   0   14.17    4.30
   9  -3   0   19.90    5.02
  -9   3   0   20.61    5.25
  -9   3   0   16.85    4.34
   9  -4   0  379.62   42.37
   9  -4   0  368.10   41.15
  -9   4   0  414.20   46.20
  -9   4   0  360.30   40.17
   9  -5   0  469.11   52.16
   9  -5   0  523.00   58.06
  -9   5   0  479.61   53.32
  -9   5   0  431.82   48.00
   9  -6   0 1279.19  141.04
   9  -6   0 1247.33  137.51
  -9   6   0 1096.16  120.90
  -9   6   0 1076.16  118.80
   9  -7   0 1255.13  138.33
   9  -7   0 1169.04  128.97
  -9   7   0 1248.69  137.65
  -9   7   0 1263.94  139.41
   9  -8   0  535.54   59.35
   9  -8   0  570.11   63.15
  -9   8   0  520.29   57.72
  -9   8   0  534.86   59.45
   9  -9   0   50.91    7.08
   9  -9   0   66.84    8.58
  -9   9   0   50.16    7.52
  -9   9   0   56.37    8.54
   9 -10   0  765.01   84.47
   9 -10   0  721.96   79.72
  -9  10   0  716.88   79.38
  -9  10   0  711.12   78.64
   9 -11   0   10.13    3.83
   9 -11   0    6.13    3.66
  -9  11   0    9.42    5.08
  -9  11   0   16.24    5.08
   9 -12   0  252.96   28.27
   9 -12   0  262.24   29.35
  -9  12   0  257.74   29.05
  -9  12   0  234.55   26.61
  10  10   0   43.86    5.97
  10  10   0   39.22    6.81
 -10 -10   0   23.66    3.83
  10   9   0   32.13    5.15
  10   9   0   26.54    6.00
 -10  -9   0   19.42    4.27
 -10  -9   0   21.08    3.73
  10   8   0  823.31   91.25
  10   8   0  762.30   84.16
 -10  -8   0  955.50  105.38
 -10  -8   0  736.88   81.25
  10   7   0  349.46   39.39
  10   7   0  355.22   39.49
 -10  -7   0  401.32   44.61
 -10  -7   0  327.12   36.30
  10   6   0  705.35   78.26
  10   6   0  510.80   56.54
 -10  -6   0  579.60   64.13
 -10  -6   0  455.89   50.50
  10   5   0  573.16   63.42
  10   5   0  426.74   47.76
 -10  -5   0  475.88   52.81
 -10  -5   0  442.67   49.01
  10   4   0  627.39   69.62
  10   4   0  570.11   63.11
 -10  -4   0  626.04   69.15
 -10  -4   0  664.00   73.38
  10   3   0  560.96   62.37
  10   3   0  563.33   62.37
 -10  -3   0  594.86   65.76
 -10  -3   0  593.16   65.59
  10   2   0   51.15    6.95
  10   2   0   55.28    8.20
 -10  -2   0   61.72    8.07
 -10  -2   0   73.59    9.05
  10   1   0  383.35   42.67
  10   1   0  409.11   45.72
 -10  -1   0  371.15   41.28
 -10  -1   0  364.71   40.47
  10   0   0 9999.00 1098.87
  10   0   0 9561.76 1051.08
 -10   0   0 9582.09 1052.78
 -10   0   0 9432.96 1036.51
  10  -1   0  391.49   43.76
  10  -1   0  394.88   43.96
 -10   1   0  380.98   42.37
 -10   1   0  372.51   41.45
  10  -2   0   63.08    8.37
  10  -2   0   51.11    7.42
 -10   2   0   63.55    8.44
 -10   2   0   64.43    8.58
  10  -3   0  692.13   76.57
  10  -3   0  659.93   73.04
 -10   3   0  750.09   82.94
 -10   3   0  646.04   71.38
 -10   4   0  718.91   79.45
 -10   4   0  804.33   88.84
  10  -5   0  589.09   65.28
  10  -5   0  526.39   58.40
 -10   5   0  515.54   57.15
 -10   5   0  588.75   65.25
  10  -6   0  633.83   70.20
  10  -6   0  534.18   59.28
 -10   6   0  668.75   73.99
 -10   6   0  664.34   73.55
  10  -7   0  546.05   60.54
  10  -7   0  510.46   56.57
 -10   7   0  506.39   56.16
 -10   7   0  513.17   56.98
  10  -8   0 1149.04  126.63
  10  -8   0 1162.60  128.12
 -10   8   0 1100.23  121.38
 -10   8   0 1152.77  127.11
  10  -9   0   28.37    4.98
  10  -9   0   35.35    5.59
 -10   9   0   31.86    6.58
 -10   9   0   42.67    6.61
  10 -10   0   51.86    7.08
 -10  10   0   50.67    7.46
 -10  10   0   53.52    8.37
  11   7   0 1905.23  209.61
 -11  -7   0 1670.68  183.74
  11   6   0  241.26   26.91
  11   6   0  276.62   31.29
 -11  -6   0  313.63   34.91
 -11  -6   0  256.86   28.61
  11   5   0   50.84    7.93
  11   5   0   42.13    5.83
 -11  -5   0   49.69    6.54
 -11  -5   0   50.77    7.02
  11   4   0  233.30   26.27
  11   4   0  208.18   23.83
 -11  -4   0  226.62   25.32
 -11  -4   0  220.62   24.88
  11   3   0  109.89   13.12
  11   3   0  103.75   12.88
 -11  -3   0  103.55   12.30
 -11  -3   0  107.21   12.54
  11   2   0   -1.36    4.10
  11   2   0    6.85    4.58
 -11  -2   0    0.44    3.22
 -11  -2   0    3.66    3.56
  11   1   0  555.54   61.52
  11   1   0  593.84   65.82
 -11  -1   0  507.41   56.13
 -11  -1   0  556.55   61.59
  11   0   0  118.09   14.30
  11   0   0  152.46   17.49
 -11   0   0  124.67   14.57
 -11   0   0  118.53   13.76
  11  -1   0  562.99   62.33
  11  -1   0  580.62   64.37
 -11   1   0  563.33   62.33
 -11   1   0  523.34   57.89
  11  -2   0    1.63    4.10
  11  -2   0    8.91    4.03
 -11   2   0    0.07    3.56
 -11   2   0    6.27    4.00
  11  -3   0  118.77   14.10
  11  -3   0  113.99   13.46
 -11   3   0  114.63   13.42
 -11   3   0  128.94   15.18
  11  -4   0  265.70   29.86
  11  -4   0  265.91   29.79
 -11   4   0  248.75   28.00
 -11   4   0  277.73   31.25
  11  -5   0   63.35    8.37
  11  -5   0   59.28    8.13
 -11   5   0   48.71    7.36
 -11   5   0   61.59    8.03
  11  -6   0  362.34   40.33
  11  -6   0  302.24   33.73
 -11   6   0  331.76   37.01
 -11   6   0  307.97   34.34
  11  -7   0 3131.89  344.37
 -11   7   0 2507.88  275.97
 -12   4   1  402.33   44.91
 -12   3   1  262.72   29.56
 -12   3   1  236.79   26.61
  12  -3  -1  214.01   24.13
  12  -3  -1  239.16   26.88
 -12   2   1  258.45   28.98
 -12   2   1  270.55   30.34
  12  -2  -1  225.60   25.39
  12  -2  -1  257.09   28.84
 -12   1   1  178.02   20.17
 -12   1   1  169.27   19.25
  12  -1  -1  175.37   19.90
  12  -1  -1  166.22   18.98
 -12   0   1    1.93    3.80
 -12   0   1   -0.75    3.32
  12   0  -1    0.44    3.76
  12   0  -1   13.56    4.44
 -12  -1   1  145.58   16.61
 -12  -1   1  191.27   21.59
  12   1  -1  166.86   19.12
  12   1  -1  185.71   21.15
  12   2  -1  235.84   26.54
  12   2  -1  231.54   26.07
 -12  -3   1  195.81   22.00
 -12  -3   1  162.83   18.54
  12   3  -1  212.96   24.00
  12   3  -1  216.11   24.47
 -12  -4   1  287.43   32.06
 -11   8   1  164.05   19.18
 -11   8   1  178.63   20.24
  11  -8  -1  158.02   18.07
  11  -8  -1  175.17   19.86
 -11   7   1   19.25    4.98
 -11   7   1   13.86    5.52
  11  -7  -1   14.88    4.34
  11  -7  -1   14.85    4.44
 -11   6   1 3952.15  434.53
 -11   6   1 3860.63  424.70
  11  -6  -1 3701.32  406.74
  11  -6  -1 3430.17  377.25
 -11   5   1 1180.22  130.16
 -11   5   1 1038.20  114.46
  11  -5  -1  967.02  106.70
  11  -5  -1  908.04  100.16
 -11   4   1   12.71    4.71
 -11   4   1   12.34    5.39
  11  -4  -1   10.20    4.24
  11  -4  -1   25.56    5.02
 -11   3   1  176.66   20.37
 -11   3   1  161.64   18.54
 -11   2   1 1513.07  166.59
 -11   2   1 1683.90  185.37
  11  -2  -1 1455.79  160.32
  11  -2  -1 1659.16  182.73
 -11   1   1  410.47   45.62
 -11   1   1  438.26   48.67
  11  -1  -1  419.28   46.57
  11  -1  -1  422.67   47.15
 -11   0   1    0.78    3.66
 -11   0   1    3.53    3.86
  11   0  -1    4.54    5.15
  11   0  -1    1.32    4.34
 -11  -1   1  398.27   44.27
 -11  -1   1  433.18   48.00
  11   1  -1  403.35   45.08
  11   1  -1  414.53   46.03
 -11  -2   1 1299.19  143.10
 -11  -2   1 1001.93  110.43
  11   2  -1 1363.25  150.12
  11   2  -1 1329.02  146.56
 -11  -3   1  143.44   16.54
 -11  -3   1  140.80   16.17
  11   3  -1  130.29   15.22
  11   3  -1  143.24   16.91
 -11  -4   1   12.44    3.90
 -11  -4   1    8.44    4.54
  11   4  -1    7.52    5.25
  11   4  -1   14.85    4.30
 -11  -5   1  921.94  101.68
 -11  -5   1  877.88   96.77
  11   5  -1  926.69  102.19
  11   5  -1  773.82   85.65
 -11  -6   1 2682.44  294.95
 -11  -6   1 3230.52  355.22
  11   6  -1 3467.45  381.66
  11   6  -1 2526.53  277.87
 -11  -7   1   13.35    4.37
 -11  -7   1    6.95    3.39
  11   7  -1   10.20    3.90
  11   7  -1    2.71    5.25
 -11  -8   1  121.48   14.10
 -11  -8   1   88.26   10.34
  11   8  -1  108.84   12.91
  11   8  -1  108.73   13.08
 -10  10   1  346.41   38.67
 -10  10   1  290.58   32.81
  10 -10  -1  322.00   35.86
  10 -10  -1  334.61   37.22
 -10   9   1  412.50   46.06
 -10   9   1  431.48   48.03
  10  -9  -1  458.94   50.88
  10  -9  -1  489.44   54.23
 -10   8   1   83.21   11.29
 -10   8   1  106.87   12.95
  10  -8  -1  101.99   12.24
  10  -8  -1  103.75   12.41
 -10   7   1  535.20   59.38
 -10   7   1  445.38   49.69
  10  -7  -1  526.73   58.37
  10  -7  -1  494.19   54.84
 -10   6   1    5.97    4.64
 -10   6   1    2.24    4.78
  10  -6  -1    6.34    4.34
  10  -6  -1    4.51    4.27
 -10   5   1 2880.39  316.92
 -10   5   1 2659.40  292.58
  10  -5  -1 2581.10  284.04
  10  -5  -1 2571.95  282.95
 -10   3   1  534.86   59.52
 -10   3   1  450.12   49.99
  10  -3  -1  477.24   53.05
  10  -3  -1  431.14   47.96
 -10   2   1  746.03   82.43
 -10   2   1  779.58   86.23
  10  -2  -1  709.42   78.47
  10  -2  -1  658.92   72.94
 -10   1   1 3470.84  382.00
 -10   1   1 3457.28  379.96
  10  -1  -1 3327.80  366.07
  10  -1  -1 3531.85  388.44
 -10   0   1    9.29    3.83
 -10   0   1    1.02    4.17
  10   0  -1    2.75    5.46
  10   0  -1   10.78    4.51
 -10  -1   1 3114.94  342.68
 -10  -1   1 2704.48  297.46
  10   1  -1 3334.58  366.74
  10   1  -1 3125.79  343.69
 -10  -2   1  680.61   75.25
 -10  -2   1  697.22   77.08
  10   2  -1  616.21   68.40
  10   2  -1  662.98   73.31
 -10  -3   1  414.20   46.06
 -10  -3   1  379.96   42.27
  10   3  -1  358.27   39.93
  10   3  -1  352.51   39.59
 -10  -4   1   14.27    4.24
 -10  -4   1   16.34    4.03
  10   4  -1   19.12    5.32
  10   4  -1   13.08    4.07
 -10  -5   1 1870.66  205.91
 -10  -5   1 1873.37  206.11
  10   5  -1 1785.58  196.56
  10   5  -1 1638.14  180.56
 -10  -6   1   -1.19    3.69
 -10  -6   1    8.95    3.29
  10   6  -1    2.68    3.25
  10   6  -1   10.13    5.25
 -10  -7   1  313.29   35.01
 -10  -7   1  299.16   33.28
  10   7  -1  373.52   41.62
  10   7  -1  323.46   36.50
 -10  -8   1   70.87    9.12
 -10  -8   1   65.99    8.17
  10   8  -1   70.77    8.85
  10   8  -1   62.37    8.81
 -10  -9   1  276.04   30.81
 -10  -9   1  277.97   30.95
  10   9  -1  319.56   35.59
  10   9  -1  305.49   34.47
 -10 -10   1  206.66   23.29
 -10 -10   1  261.30   29.08
  10  10  -1  251.91   28.17
  10  10  -1  240.86   27.45
  -9  12   1 1228.01  135.38
  -9  12   1 1107.35  122.09
   9 -12  -1 1212.76  133.51
   9 -12  -1 1135.48  125.04
  -9  11   1  265.84   30.23
  -9  11   1  271.02   30.61
   9 -11  -1  266.89   29.93
   9 -11  -1  248.99   27.93
  -9  10   1   57.05    8.34
  -9  10   1   64.23    9.73
   9 -10  -1   35.69    5.52
   9 -10  -1   58.54    7.69
  -9   9   1  128.97   15.39
  -9   9   1  129.75   15.66
   9  -9  -1  115.21   13.56
   9  -9  -1  135.72   15.76
  -9   8   1  748.74   82.91
  -9   8   1  738.57   81.72
   9  -8  -1  775.52   85.65
   9  -8  -1  902.28   99.58
  -9   7   1   27.76    6.30
  -9   7   1   29.79    5.52
   9  -7  -1   31.42    5.83
   9  -7  -1   38.03    6.00
  -9   6   1  791.11   87.58
  -9   6   1  859.58   94.97
   9  -6  -1  922.96  101.89
   9  -6  -1  907.37  100.19
  -9   5   1  163.10   19.08
  -9   5   1  156.87   18.03
   9  -5  -1  150.49   17.42
   9  -5  -1  142.56   16.68
  -9   4   1  736.54   81.69
  -9   4   1  627.06   69.38
   9  -4  -1  619.26   68.60
   9  -4  -1  685.69   75.86
  -9   3   1  951.09  104.94
  -9   3   1 1092.77  120.63
   9  -3  -1  992.10  109.51
   9  -3  -1  956.51  105.58
  -9   2   1 1122.26  123.75
  -9   2   1 1008.03  111.18
   9  -2  -1 1002.95  110.70
   9  -2  -1  924.99  102.16
  -9   1   1  219.30   24.91
  -9   1   1  229.37   25.93
   9  -1  -1  176.19   20.30
   9  -1  -1  216.18   24.51
  -9   0   1   -0.61    3.97
  -9   0   1    0.51    3.90
   9   0  -1    4.34    4.20
   9   0  -1    1.08    4.54
  -9  -1   1  210.93   23.86
  -9  -1   1  205.30   23.35
   9   1  -1  195.61   22.24
   9   1  -1  192.83   22.30
  -9  -2   1  929.40  102.53
  -9  -2   1  946.01  104.43
   9   2  -1  867.37   95.99
   9   2  -1  832.46   91.89
  -9  -3   1  807.72   89.21
  -9  -3   1  738.23   81.59
   9   3  -1  669.42   74.26
   9   3  -1  722.64   79.89
  -9  -4   1  487.41   54.03
  -9  -4   1  455.21   50.54
   9   4  -1  383.35   42.94
   9   4  -1  382.67   42.64
  -9  -5   1   98.43   11.76
  -9  -5   1  106.84   12.41
   9   5  -1  107.31   13.32
   9   5  -1  108.77   12.85
  -9  -6   1  511.47   56.64
  -9  -6   1  523.34   58.03
   9   6  -1  644.34   71.25
   9   6  -1  520.96   58.03
   9   7  -1   21.39    4.10
   9   7  -1   20.27    5.59
  -9  -8   1  516.22   57.08
  -9  -8   1  552.83   61.18
   9   8  -1  488.76   54.16
   9   8  -1  525.37   58.60
  -9  -9   1   86.30   10.30
  -9  -9   1   91.65   11.15
   9   9  -1   88.09   10.58
   9   9  -1   90.84   11.69
  -9 -10   1   45.28    6.58
  -9 -10   1   45.66    6.03
   9  10  -1   48.67    6.68
   9  10  -1   51.55    7.90
  -9 -11   1  167.88   18.98
  -9 -11   1  222.79   25.05
   9  11  -1  194.49   21.93
   9  11  -1  177.98   20.68
  -9 -12   1  928.72  102.29
  -9 -12   1  817.21   90.09
   9  12  -1  755.52   83.69
   9  12  -1  958.21  105.55
  -8  14   1  136.80   16.10
  -8  14   1  152.15   17.79
   8 -14  -1  139.24   15.83
   8 -14  -1  136.29   15.59
  -8  13   1  264.24   30.00
  -8  13   1  215.57   24.61
   8 -13  -1  220.32   24.74
   8 -13  -1  218.96   24.54
  -8  12   1 1322.58  145.78
  -8  12   1 1384.95  152.63
   8 -12  -1 1265.30  139.34
   8 -12  -1 1375.79  151.51
  -8  11   1  745.69   82.50
  -8  11   1  779.24   86.23
   8 -11  -1  669.76   74.03
   8 -11  -1  726.71   80.26
  -8  10   1   15.96    5.59
  -8  10   1   12.27    5.29
   8 -10  -1   11.42    3.83
   8 -10  -1   10.07    3.97
  -8   9   1 1624.24  178.93
  -8   9   1 1607.97  177.24
   8  -9  -1 1732.03  190.76
   8  -9  -1 1516.46  167.00
  -8   8   1  570.45   63.32
  -8   8   1  601.97   66.81
   8  -8  -1  588.08   65.18
   8  -8  -1  725.01   80.13
  -8   7   1  395.55   44.23
  -8   7   1  471.14   52.54
   8  -7  -1  533.51   59.21
   8  -7  -1  398.60   44.33
  -8   6   1 4077.56  448.43
  -8   6   1 3542.02  389.79
   8  -6  -1 3925.03  431.48
   8  -6  -1 4074.17  448.09
  -8   5   1  785.68   86.87
  -8   5   1  821.61   91.04
   8  -5  -1  812.80   89.86
   8  -5  -1  912.45  100.77
  -8   4   1   83.38   10.61
  -8   4   1   90.53   11.25
   8  -4  -1   72.91    9.22
   8  -4  -1  103.31   12.44
  -8   3   1  113.99   13.59
  -8   3   1  114.67   13.66
   8  -3  -1  111.34   13.32
   8  -3  -1  122.06   14.47
  -8   2   1 1818.80  200.22
  -8   2   1 1678.14  184.80
   8  -2  -1 1939.47  213.54
   8  -2  -1 1618.14  178.25
  -8   1   1   57.93    7.93
  -8   1   1   61.45    8.00
   8  -1  -1   40.64    6.27
   8  -1  -1   42.57    6.54
  -8   0   1    2.71    3.56
  -8   0   1    6.20    3.69
   8   0  -1   -1.08    3.97
   8   0  -1    6.27    3.80
  -8  -1   1   50.20    6.95
  -8  -1   1   53.25    7.49
   8   1  -1   43.49    7.12
   8   1  -1   45.79    6.54
  -8  -2   1 1388.67  153.04
  -8  -2   1 1399.86  154.22
   8   2  -1 1221.23  134.80
   8   2  -1 1355.80  149.37
  -8  -3   1   69.65    8.98
  -8  -3   1   86.43   10.37
  -8  -4   1   56.57    7.15
  -8  -4   1   59.38    7.76
   8   4  -1   57.35    7.97
   8   4  -1   67.69    8.44
  -8  -5   1  533.17   59.08
  -8  -5   1  589.09   65.11
   8   5  -1  541.30   60.23
   8   5  -1  598.92   66.23
  -8  -6   1 2400.10  264.08
  -8  -6   1 2632.62  289.56
   8   6  -1 2847.17  313.16
   8   6  -1 2362.48  260.18
  -8  -7   1  318.34   35.56
  -8  -7   1  283.90   31.83
   8   7  -1  327.19   36.54
   8   7  -1  254.38   28.98
  -8  -8   1  367.08   40.81
  -8  -8   1  383.35   42.71
   8   8  -1  352.51   39.22
   8   8  -1  377.59   42.40
  -8  -9   1 1106.33  121.99
  -8  -9   1 1090.06  120.06
   8   9  -1 1011.42  111.82
   8   9  -1 1025.66  113.04
  -8 -10   1    7.83    3.59
  -8 -10   1    8.95    2.98
   8  10  -1    9.90    5.29
   8  10  -1   10.41    4.00
  -8 -11   1  501.98   55.49
  -8 -11   1  503.68   55.76
   8  11  -1  504.02   56.20
   8  11  -1  547.06   60.50
  -8 -12   1  980.24  108.06
  -8 -12   1  933.80  102.90
   8  12  -1  995.49  109.68
   8  12  -1  994.14  109.89
  -8 -13   1  171.07   19.25
  -8 -13   1  188.63   21.25
   8  13  -1  216.42   24.91
   8  13  -1  197.57   22.24
  -8 -14   1  101.24   11.56
  -8 -14   1  143.10   16.27
   8  14  -1  112.40   12.95
   8  14  -1  122.63   14.98
  -7  15   1   65.76    9.12
  -7  15   1   77.69   10.68
   7 -15  -1   64.43    8.07
   7 -15  -1   68.20    8.58
  -7  14   1   69.93    9.08
  -7  14   1   87.11   11.25
   7 -14  -1   76.30    9.19
   7 -14  -1   68.26    8.61
  -7  13   1 1504.93  165.81
  -7  13   1 1622.55  178.83
   7 -13  -1 1512.39  166.49
   7 -13  -1 1442.57  158.80
  -7  12   1  199.30   23.25
  -7  12   1  145.34   17.02
   7 -12  -1  149.31   17.32
   7 -12  -1  156.12   17.79
  -7  11   1   21.56    5.93
  -7  11   1    4.88    4.58
   7 -11  -1    3.08    3.36
   7 -11  -1    5.86    4.03
  -7  10   1  541.98   60.23
  -7  10   1  536.56   59.66
  -7   9   1 1058.54  116.87
  -7   9   1  965.67  106.63
   7  -9  -1  966.68  106.60
   7  -9  -1 1045.66  115.34
  -7   8   1  121.65   14.85
  -7   8   1  129.55   15.46
   7  -8  -1  106.09   12.68
   7  -8  -1  119.04   13.93
  -7   7   1 1279.19  141.04
  -7   7   1 1296.82  143.17
   7  -7  -1 1203.61  132.73
   7  -7  -1 1266.65  139.61
  -7   6   1 1070.40  118.12
  -7   6   1 1155.14  127.58
   7  -6  -1 1176.83  129.82
   7  -6  -1 1109.04  122.29
  -7   5   1 4206.36  462.33
  -7   5   1 3982.65  437.92
   7  -5  -1 4121.62  453.18
   7  -5  -1 3992.82  438.94
  -7   4   1   29.18    5.29
  -7   4   1   35.89    6.47
   7  -4  -1   37.08    6.03
   7  -4  -1   32.37    5.39
  -7   3   1 1248.69  137.65
  -7   3   1 1433.42  157.88
   7  -3  -1 1568.66  172.83
   7  -3  -1 1244.62  137.21
  -7   2   1  103.58   12.27
  -7   2   1  101.52   12.30
   7  -2  -1   93.35   11.66
   7  -2  -1  101.41   12.27
  -7   1   1 4430.07  487.07
  -7   1   1 4823.25  530.46
   7  -1  -1 4697.84  516.56
   7  -1  -1 4209.75  462.67
  -7   0   1    1.80    4.37
  -7   0   1    2.78    3.93
   7   0  -1    0.07    3.86
   7   0  -1    0.78    4.75
  -7  -1   1 3904.69  429.11
  -7  -1   1 3718.27  408.77
   7   1  -1 3166.12  348.44
   7   1  -1 3575.91  393.18
  -7  -2   1   69.76    8.81
  -7  -2   1   69.25    8.85
   7   2  -1   64.57    8.34
   7   2  -1   55.38    7.93
  -7  -3   1  936.18  103.35
  -7  -3   1  952.45  105.11
   7   3  -1  847.37   93.79
   7   3  -1 1099.89  121.24
  -7  -4   1   26.61    4.68
  -7  -4   1   28.98    4.71
   7   4  -1   26.61    5.08
   7   4  -1   30.84    5.05
  -7  -5   1 3623.37  398.27
  -7  -5   1 2843.44  312.82
   7   5  -1 3552.19  390.47
   7   5  -1 2776.67  305.63
  -7  -6   1  820.60   90.64
  -7  -6   1  768.06   84.87
   7   6  -1  721.96   80.03
   7   6  -1  730.10   80.64
  -7  -7   1  827.04   91.31
  -7  -7   1  840.93   92.87
   7   7  -1  833.48   91.92
   7   7  -1  793.48   87.86
  -7  -8   1   97.92   11.73
  -7  -8   1   78.81    9.42
   7   8  -1   90.06   10.68
   7   8  -1   94.09   12.03
  -7  -9   1  704.68   77.75
  -7  -9   1  714.84   79.01
   7   9  -1  529.10   58.50
   7   9  -1  687.39   76.37
  -7 -10   1  302.21   33.69
  -7 -10   1  299.22   33.39
   7  10  -1  296.34   33.56
   7  10  -1  298.78   33.32
  -7 -11   1    5.63    3.42
  -7 -11   1   12.34    3.56
   7  11  -1    0.27    4.58
   7  11  -1    3.32    3.69
  -7 -12   1  112.40   13.15
  -7 -12   1  148.60   16.95
   7  12  -1  141.55   17.02
   7  12  -1  131.04   15.18
  -7 -13   1 1237.84  136.33
  -7 -13   1 1225.30  134.90
   7  13  -1 1166.32  128.53
   7  13  -1 1251.06  138.12
  -7 -14   1   72.67    8.81
  -7 -14   1   56.03    7.12
   7  14  -1   92.30   12.10
   7  14  -1   58.33    7.66
  -7 -15   1   60.81    7.73
  -7 -15   1   63.21    7.69
   7  15  -1   56.98    7.46
   7  15  -1   73.28    9.97
  -6  16   1  451.82   50.30
  -6  16   1  474.53   52.77
  -6  15   1  327.12   36.64
  -6  15   1  359.96   40.33
   6 -15  -1  362.00   40.17
   6 -15  -1  344.03   38.27
  -6  14   1   29.18    6.37
  -6  14   1   26.61    6.07
   6 -14  -1   31.05    4.85
   6 -14  -1   36.37    6.03
  -6  13   1 1984.55  218.45
  -6  13   1 2288.92  252.04
   6 -13  -1 2148.60  236.38
   6 -13  -1 2102.50  231.33
  -6  12   1  920.92  101.79
  -6  12   1  949.74  104.97
   6 -12  -1  964.65  106.33
   6 -12  -1 1054.47  116.29
  -6  11   1  738.23   81.82
  -6  11   1  705.35   78.09
   6 -11  -1  708.74   78.33
   6 -11  -1  908.04  100.16
  -6  10   1  938.55  103.65
  -6  10   1  831.44   92.02
   6 -10  -1  701.96   77.55
   6 -10  -1  851.44   93.99
  -6   9   1   38.57    7.22
  -6   9   1   60.43    9.08
   6  -9  -1   45.69    6.58
   6  -9  -1   44.33    6.44
  -6   8   1  634.85   70.43
  -6   8   1  529.10   58.84
   6  -8  -1  508.08   56.33
   6  -8  -1  535.88   59.35
  -6   7   1   58.23    8.20
  -6   7   1   81.75   10.47
   6  -7  -1   57.42    7.66
   6  -7  -1   66.03    8.44
  -6   6   1 1087.01  119.95
  -6   6   1 1040.57  114.84
   6  -6  -1 1046.67  115.51
   6  -6  -1 1049.05  115.68
  -6   5   1  617.23   68.40
  -6   5   1  620.95   68.81
   6  -5  -1  560.96   62.10
   6  -5  -1  488.76   54.30
  -6   4   1  466.39   51.72
  -6   4   1  560.96   62.26
   6  -4  -1  507.41   56.23
   6  -4  -1  523.00   57.96
  -6   3   1 1050.06  115.75
  -6   3   1 1150.73  126.94
   6  -3  -1 1132.09  124.77
   6  -3  -1 1276.14  140.66
  -6   2   1 3323.74  365.39
  -6   2   1 2695.66  296.55
   6  -2  -1 2920.72  321.26
   6  -2  -1 3687.77  405.38
  -6   1   1  964.31  106.40
  -6   1   1  888.39   98.02
   6  -1  -1  825.68   91.21
   6  -1  -1  847.03   93.48
  -6   0   1    5.05    3.46
  -6   0   1    4.54    3.63
   6   0  -1    1.42    3.83
   6   0  -1    7.08    3.25
  -6  -1   1  590.11   65.25
  -6  -1   1  737.89   81.48
   6   1  -1  662.31   73.21
   6   1  -1  507.07   56.30
  -6  -2   1 2279.77  250.86
  -6  -2   1 1987.60  218.72
   6   2  -1 2515.00  276.68
   6   2  -1 1937.77  213.40
  -6  -3   1 1076.84  118.73
  -6  -3   1  915.50  101.04
   6   3  -1  870.42   96.19
   6   3  -1 1038.54  114.50
  -6  -4   1  473.85   52.60
  -6  -4   1  434.87   48.33
   6   4  -1  377.25   42.13
   6   4  -1  414.20   45.93
  -6  -5   1  507.75   56.33
  -6  -5   1  420.30   46.71
   6   5  -1  414.87   46.27
   6   5  -1  464.36   51.42
  -6  -6   1  805.68   89.01
  -6  -6   1  772.80   85.38
   6   6  -1  710.10   78.74
   6   6  -1  723.32   79.82
  -6  -7   1   53.11    7.15
  -6  -7   1   48.50    6.64
   6   7  -1   43.22    6.03
   6   7  -1   56.67    8.00
  -6  -8   1  465.04   51.62
  -6  -8   1  382.00   42.47
   6   8  -1  348.78   38.78
   6   8  -1  371.15   41.59
  -6  -9   1   29.29    4.30
  -6  -9   1   33.32    5.52
   6   9  -1   30.17    5.08
   6   9  -1   32.95    6.00
  -6 -10   1  714.17   78.84
  -6 -10   1  627.73   69.48
   6  10  -1  680.27   75.18
   6  10  -1  637.90   70.91
  -6 -11   1  566.72   62.67
  -6 -11   1  614.85   68.03
   6  11  -1  580.96   64.30
   6  11  -1  636.55   70.77
  -6 -12   1  808.05   89.14
  -6 -12   1  762.97   84.23
   6  12  -1  846.36   93.48
   6  12  -1  860.59   95.28
  -6 -13   1 1837.78  202.25
  -6 -13   1 1821.51  200.45
  -6 -14   1   26.17    4.61
  -6 -14   1   25.05    4.17
   6  14  -1   44.74    6.20
   6  14  -1   36.88    7.12
  -6 -15   1  321.15   35.69
  -6 -15   1  322.00   35.76
   6  15  -1  491.14   54.84
   6  15  -1  360.98   40.23
  -6 -16   1  448.43   49.59
  -6 -16   1  453.51   50.16
   6  16  -1  575.54   63.59
   6  16  -1  573.16   63.65
  -5  17   1  720.27   79.65
  -5  17   1  762.30   84.40
   5 -17  -1  727.05   80.16
   5 -17  -1  744.33   82.09
  -5  16   1  499.95   55.82
  -5  16   1  419.62   46.71
   5 -16  -1  482.32   53.32
   5 -16  -1  501.64   55.55
  -5  15   1  531.13   59.01
  -5  15   1  598.25   66.60
   5 -15  -1  632.14   69.76
   5 -15  -1  570.79   63.18
  -5  14   1  135.44   15.86
  -5  14   1  129.31   16.03
   5 -14  -1  128.02   15.15
   5 -14  -1  159.10   18.10
  -5  13   1   36.20    6.81
  -5  13   1   50.20    8.37
   5 -13  -1   44.33    5.97
   5 -13  -1   45.52    6.81
  -5  12   1 2941.74  323.80
  -5  12   1 2847.51  313.29
   5 -12  -1 2931.23  322.37
   5 -12  -1 2854.29  313.90
  -5  11   1  885.00   97.75
  -5  11   1  914.82  101.21
   5 -11  -1  877.20   96.77
   5 -11  -1  914.15  100.84
  -5  10   1   29.69    6.51
  -5  10   1   24.51    5.83
   5 -10  -1   51.08    6.75
   5 -10  -1   33.89    5.66
  -5   9   1 3121.04  343.36
  -5   9   1 2844.12  312.95
   5  -9  -1 2469.24  271.67
   5  -9  -1 3052.92  335.76
  -5   8   1 2169.61  238.82
  -5   8   1 2165.55  238.42
   5  -8  -1 2066.23  227.40
   5  -8  -1 2136.06  235.06
  -5   7   1  854.83   94.60
  -5   7   1  946.01  104.36
   5  -7  -1  812.46   89.69
   5  -7  -1  833.14   91.99
  -5   6   1 4572.42  503.00
  -5   6   1 4413.12  485.04
   5  -6  -1 4314.82  474.53
   5  -6  -1 4060.61  446.73
  -5   5   1 1563.91  172.25
  -5   5   1 1673.39  184.25
   5  -5  -1 1782.19  196.12
   5  -5  -1 1423.59  156.80
  -5   4   1  515.20   57.15
  -5   4   1  432.16   48.03
   5  -4  -1  441.65   48.98
   5  -4  -1  447.41   49.62
  -5   3   1  356.24   39.66
  -5   3   1  365.39   40.67
   5  -3  -1  382.00   42.40
   5  -3  -1  406.74   45.15
  -5   2   1  797.55   88.03
  -5   2   1  922.62  101.79
   5  -2  -1 1010.07  111.38
   5  -2  -1  924.99  101.96
  -5   1   1   18.00    3.53
  -5   1   1   27.05    4.41
   5  -1  -1   19.05    3.80
   5  -1  -1   16.34    3.63
  -5   0   1    0.37    2.54
  -5   0   1    1.69    2.58
   5   0  -1    3.93    2.61
   5   0  -1    0.75    2.81
  -5  -1   1   17.29    3.42
  -5  -1   1   12.47    3.19
   5   1  -1   18.51    3.36
   5   1  -1    8.07    3.12
  -5  -2   1 1053.12  116.12
  -5  -2   1  799.24   88.19
   5   2  -1  948.72  104.57
   5   2  -1  817.55   90.23
  -5  -3   1  326.88   36.40
  -5  -3   1  384.37   42.74
   5   3  -1  320.07   35.76
   5   3  -1  363.01   40.27
  -5  -4   1  384.03   42.67
  -5  -4   1  397.25   44.13
   5   4  -1  363.69   40.57
   5   4  -1  364.71   40.47
  -5  -5   1 1416.81  156.05
  -5  -5   1 1155.14  127.34
   5   5  -1 1141.58  125.99
   5   5  -1 1145.99  126.22
  -5  -6   1 3508.12  385.72
  -5  -6   1 3093.25  340.30
   5   6  -1 3207.14  352.51
   5   6  -1 3299.67  363.01
  -5  -7   1  732.81   80.97
  -5  -7   1  619.94   68.60
   5   7  -1  588.75   65.38
   5   7  -1  541.30   59.89
  -5  -8   1 1461.55  160.93
  -5  -8   1 1627.29  179.20
   5   8  -1 1663.22  183.10
   5   8  -1 1428.67  157.65
  -5  -9   1 2202.49  242.38
  -5  -9   1 2571.27  282.85
   5   9  -1 1792.02  197.27
   5   9  -1 1980.82  218.25
  -5 -10   1   20.13    4.20
  -5 -10   1   16.95    3.53
   5  10  -1   20.13    3.97
   5  10  -1   29.56    6.34
  -5 -11   1  788.06   87.04
  -5 -11   1  777.21   85.82
   5  11  -1  781.62   86.67
   5  11  -1  760.94   84.03
  -5 -12   1 2673.63  294.11
  -5 -12   1 2754.30  302.95
  -5 -13   1   47.22    6.34
  -5 -13   1   31.49    4.98
   5  13  -1   40.67    6.13
   5  13  -1   32.00    6.58
  -5 -14   1  116.94   13.46
  -5 -14   1  117.89   13.63
   5  14  -1  139.41   17.02
   5  14  -1  137.72   16.00
  -5 -15   1  541.98   59.93
  -5 -15   1  516.90   57.18
   5  15  -1  582.31   64.81
   5  15  -1  563.33   62.30
  -5 -16   1  461.31   51.01
  -5 -16   1  380.30   42.13
   5  16  -1  477.58   52.98
   5  16  -1  500.63   55.79
  -5 -17   1  665.70   73.38
  -5 -17   1  708.74   78.13
   5  17  -1  677.56   74.74
   5  17  -1  845.00   93.45
  -4  17   1  129.34   15.35
  -4  17   1  127.44   16.20
   4 -17  -1  146.66   16.64
   4 -17  -1  121.38   13.96
  -4  16   1  268.55   30.98
  -4  16   1  233.13   26.44
   4 -16  -1  229.91   25.83
   4 -16  -1  210.49   23.56
  -4  15   1  216.83   24.68
  -4  15   1  241.26   28.20
   4 -15  -1  228.82   25.59
   4 -15  -1  214.55   24.23
  -4  14   1  328.95   37.42
  -4  14   1  350.13   39.32
   4 -14  -1  339.63   37.96
   4 -14  -1  307.09   34.17
  -4  13   1 1432.40  157.85
  -4  13   1 1457.14  160.83
   4 -13  -1 1377.83  151.71
   4 -13  -1 1504.60  165.68
  -4  12   1  142.63   16.81
  -4  12   1  152.56   18.47
   4 -12  -1  160.97   18.34
   4 -12  -1  142.05   16.47
  -4  11   1   11.39    4.47
  -4  11   1   11.22    5.66
   4 -11  -1    4.47    3.08
   4 -11  -1    7.12    3.90
   4 -10  -1  376.23   41.86
   4 -10  -1  370.13   41.15
  -4   9   1 2065.56  227.57
  -4   9   1 2052.34  225.98
   4  -9  -1 1865.24  205.27
   4  -9  -1 1814.39  199.67
  -4   8   1   21.93    5.08
  -4   8   1   25.32    6.00
   4  -8  -1   27.15    4.75
   4  -8  -1   40.06    6.07
  -4   7   1 1053.45  116.26
  -4   7   1 1072.10  118.23
   4  -7  -1 1027.35  113.18
   4  -7  -1 1045.32  115.21
  -4   6   1 6094.31  670.10
  -4   6   1 6870.50  755.18
   4  -6  -1 5785.86  636.21
   4  -6  -1 6545.11  719.25
  -4   5   1 4874.09  535.88
  -4   5   1 4843.58  532.49
   4  -5  -1 5128.30  564.01
   4  -5  -1 4667.33  513.17
  -4   4   1  164.12   18.64
  -4   4   1  190.18   21.46
   4  -4  -1  157.20   17.79
   4  -4  -1  156.90   17.83
  -4   3   1 1975.73  217.37
  -4   3   1 1629.67  179.30
   4  -3  -1 1698.47  186.93
   4  -3  -1 1748.64  192.39
  -4   2   1   81.04    9.59
  -4   2   1   78.47    9.15
   4  -2  -1   91.18   10.61
   4  -2  -1   84.36    9.93
  -4   1   1 2870.56  315.60
  -4   1   1 3491.18  383.69
   4  -1  -1 2939.03  323.22
   4  -1  -1 2814.63  309.46
  -4   0   1    1.63    2.44
  -4   0   1    6.98    2.20
  -4  -1   1 2740.40  301.33
  -4  -1   1 3772.50  414.87
   4   1  -1 2594.66  285.36
   4   1  -1 3535.24  388.44
  -4  -2   1  100.50   11.76
  -4  -2   1   93.82   10.98
   4   2  -1   84.84   10.03
   4   2  -1   94.40   10.81
  -4  -3   1 1577.81  173.68
  -4  -3   1 1740.17  191.51
   4   3  -1 1438.84  158.46
   4   3  -1 1600.86  176.12
  -4  -4   1  132.94   15.29
  -4  -4   1  135.95   15.46
   4   4  -1  126.09   14.37
   4   4  -1  115.45   13.42
  -4  -5   1 3908.08  429.79
  -4  -5   1 3433.55  377.59
   4   5  -1 3599.64  395.89
   4   5  -1 3351.19  368.78
  -4  -6   1 5172.36  568.76
  -4  -6   1 4369.05  479.95
   4   6  -1 4772.40  524.69
   4   6  -1 4470.74  491.48
  -4  -7   1  749.08   82.74
  -4  -7   1  775.52   85.58
   4   7  -1  711.12   78.50
   4   7  -1  733.49   81.25
   4   8  -1   30.67    4.95
   4   8  -1   16.47    4.78
  -4  -9   1 1668.65  183.71
  -4  -9   1 1540.86  169.68
   4   9  -1 1572.39  173.10
   4   9  -1 1574.08  173.61
  -4 -10   1  299.22   33.42
  -4 -10   1  329.97   36.84
   4  10  -1  293.90   33.18
   4  10  -1  299.16   33.39
  -4 -11   1    6.07    2.81
  -4 -11   1   11.22    3.53
   4  11  -1    1.90    4.95
   4  11  -1   10.78    3.59
  -4 -12   1  126.43   14.54
  -4 -12   1  135.21   15.59
   4  12  -1  126.46   15.46
   4  12  -1  136.16   15.76
  -4 -13   1 1132.77  124.80
  -4 -13   1 1349.36  148.63
   4  13  -1 1369.35  151.17
   4  13  -1 1414.10  155.75
  -4 -14   1  284.89   31.79
  -4 -14   1  284.45   31.69
   4  14  -1  325.87   36.37
   4  14  -1  315.43   35.73
  -4 -15   1  217.74   24.44
  -4 -15   1  219.03   24.61
   4  15  -1  220.15   24.84
   4  15  -1  226.01   26.34
  -4 -16   1  188.93   21.25
  -4 -16   1  246.89   27.62
  -4 -17   1  129.99   14.81
  -4 -17   1  111.75   12.95
   4  17  -1  110.09   13.63
   4  17  -1  140.22   16.27
  -3  18   1   27.35    6.17
  -3  18   1   29.45    7.08
   3 -18  -1   24.17    3.93
   3 -18  -1   23.83    4.71
  -3  17   1    8.85    5.19
  -3  17   1    4.64    7.15
   3 -17  -1    8.24    3.02
   3 -17  -1    8.95    4.10
  -3  16   1  440.97   49.15
  -3  16   1  521.98   58.43
   3 -16  -1  499.95   55.38
   3 -16  -1  477.58   52.84
  -3  15   1  474.19   52.81
  -3  15   1  493.17   55.42
   3 -15  -1  553.84   61.38
   3 -15  -1  509.10   56.27
  -3  14   1   29.79    5.63
  -3  14   1   31.56    7.19
   3 -14  -1   34.34    5.83
   3 -14  -1   30.71    4.64
  -3  13   1 3229.85  355.56
  -3  13   1 3511.51  386.40
   3 -13  -1 3853.85  423.69
   3 -13  -1 3233.24  355.56
  -3  12   1  121.14   14.85
  -3  12   1  161.20   19.25
   3 -12  -1  116.94   13.49
   3 -12  -1  139.10   16.13
  -3  11   1  545.03   60.64
  -3  11   1  767.04   85.14
   3 -11  -1  602.65   66.67
   3 -11  -1  533.51   59.04
  -3  10   1 1807.95  199.30
  -3  10   1 1817.45  200.15
   3 -10  -1 1801.51  198.25
   3 -10  -1 1740.17  191.54
  -3   9   1   83.21   11.08
  -3   9   1   79.96    9.69
   3  -9  -1   77.79    9.32
   3  -9  -1   83.11    9.93
  -3   8   1   81.59    9.93
  -3   8   1   94.87   11.93
   3  -8  -1   86.77   10.24
   3  -8  -1   79.99    9.56
  -3   7   1   -0.10    3.29
  -3   7   1    9.63    4.41
  -3   6   1 1050.06  115.68
  -3   6   1 1144.29  126.22
   3  -6  -1 1189.71  130.97
   3  -6  -1  984.31  108.43
  -3   5   1 1475.11  162.32
  -3   5   1 1492.73  164.42
   3  -5  -1 1370.37  150.83
   3  -5  -1 1420.87  156.36
  -3   4   1   96.87   11.42
  -3   4   1   97.18   11.08
   3  -4  -1   94.02   10.88
   3  -4  -1  114.73   13.05
  -3   3   1  821.27   90.43
  -3   3   1  901.94   99.41
   3  -3  -1  808.73   89.11
   3  -3  -1  882.96   97.21
  -3   2   1 4745.29  521.64
  -3   2   1 5185.92  569.77
   3  -2  -1 4375.83  480.97
  -3   1   1 1861.85  204.76
  -3   1   1 1841.17  202.52
   3  -1  -1 1966.24  216.22
   3  -1  -1 1777.11  195.47
  -3   0   1   -0.31    1.39
  -3   0   1    2.64    1.97
   3   0  -1    1.32    1.49
   3   0  -1    0.88    1.59
  -3  -1   1 2805.48  308.44
  -3  -1   1 3319.33  365.05
   3   1  -1 2724.47  299.50
   3   1  -1 2689.56  295.70
  -3  -2   1 4762.24  523.34
   3   2  -1 5040.17  553.84
   3   2  -1 4511.41  495.88
  -3  -3   1  705.69   77.82
  -3  -3   1  787.72   86.80
   3   3  -1  744.67   82.06
   3   3  -1  667.73   73.69
  -3  -4   1   81.62    9.52
  -3  -4   1   77.89    9.22
   3   4  -1   71.31    8.44
   3   4  -1   78.81    9.39
  -3  -5   1 1168.70  128.73
  -3  -5   1 1019.56  112.26
   3   5  -1  918.55  101.18
   3   5  -1 1121.58  123.72
  -3  -6   1  845.00   93.21
  -3  -6   1  832.12   91.75
   3   6  -1  835.51   92.30
   3   6  -1  841.61   92.80
  -3  -7   1   -1.29    3.39
  -3  -7   1    2.44    2.41
   3   7  -1    3.97    2.81
   3   7  -1    0.95    3.49
  -3  -8   1   70.81    8.58
  -3  -8   1   77.55    9.46
   3   8  -1   76.64    9.93
   3   8  -1   72.50    8.91
  -3  -9   1   73.18    9.12
  -3  -9   1   91.21   10.81
   3   9  -1   93.21   10.98
   3   9  -1  121.78   14.68
  -3 -10   1 1465.96  161.44
  -3 -10   1 1630.35  179.51
   3  10  -1 1599.50  176.08
   3  10  -1 1465.62  161.68
  -3 -11   1  469.11   52.03
  -3 -11   1  460.97   51.05
   3  11  -1  528.76   58.60
   3  11  -1  473.17   52.88
  -3 -12   1   97.31   11.32
  -3 -12   1  112.06   13.05
   3  12  -1  110.36   13.19
   3  12  -1  102.60   13.08
  -3 -13   1 3170.19  348.78
  -3 -13   1 3058.68  336.37
   3  13  -1 3119.35  343.36
   3  13  -1 3325.77  365.73
  -3 -14   1   22.54    4.20
  -3 -14   1   24.95    4.00
   3  14  -1   24.78    6.17
   3  14  -1   30.61    6.20
  -3 -15   1  459.28   50.84
  -3 -15   1  419.96   46.57
   3  15  -1  428.43   48.06
   3  15  -1  530.79   58.91
  -3 -16   1  415.89   46.10
  -3 -16   1  493.85   54.60
   3  16  -1  468.77   52.54
   3  16  -1  485.04   53.79
  -3 -17   1    3.73    2.81
  -3 -17   1    4.68    2.71
   3  17  -1    9.32    4.78
   3  17  -1    2.61    5.93
  -3 -18   1   25.15    4.20
  -3 -18   1   19.76    3.42
   3  18  -1   20.07    6.88
   3  18  -1   19.32    4.61
  -2  18   1   35.18    6.75
  -2  18   1   40.81    8.81
   2 -18  -1   32.88    5.22
   2 -18  -1   36.71    4.98
   2 -17  -1  850.76   93.75
   2 -17  -1  854.49   94.23
  -2  16   1 1534.08  169.54
  -2  16   1 1428.67  157.41
   2 -16  -1 1494.43  164.49
   2 -16  -1 1614.75  177.78
  -2  15   1  405.38   46.00
  -2  15   1  366.74   41.05
   2 -15  -1  358.27   39.79
   2 -15  -1  382.00   42.47
  -2  14   1   71.82    9.19
  -2  14   1   82.26   11.96
   2 -14  -1   82.81   10.07
   2 -14  -1   74.06    8.91
   2 -13  -1   37.11    5.46
   2 -13  -1   44.88    5.90
  -2  12   1 3603.03  396.23
  -2  12   1 3857.24  424.03
   2 -12  -1 4643.60  510.46
   2 -12  -1 3813.18  418.94
  -2  11   1  227.27   25.79
  -2  11   1  238.89   27.45
   2 -11  -1  231.71   25.93
   2 -11  -1  237.13   26.57
   2 -10  -1   48.44    6.37
   2 -10  -1   44.84    5.93
  -2   9   1 3572.52  393.18
  -2   9   1 2697.02  296.65
   2  -9  -1 3104.77  341.32
   2  -9  -1 3008.51  330.78
  -2   8   1 3277.30  360.30
  -2   8   1 3819.96  419.96
   2  -8  -1 3085.79  339.29
   2  -8  -1 4138.57  454.87
  -2   7   1  360.30   39.96
  -2   7   1  482.66   53.66
   2  -7  -1  387.08   42.88
   2  -7  -1  468.09   51.72
  -2   6   1 3965.71  436.23
  -2   6   1 4453.79  489.78
   2  -6  -1 4487.69  493.17
   2  -6  -1 3884.36  427.08
  -2   5   1 1127.68  124.29
  -2   5   1  850.08   93.58
   2  -5  -1 1042.95  114.80
   2  -5  -1 1250.72  137.65
  -2   4   1 1670.00  183.64
  -2   4   1 2164.87  238.15
   2  -4  -1 1842.19  202.59
   2  -4  -1 1967.60  216.32
  -2   3   1 1745.25  191.91
  -2   3   1 1644.24  180.93
   2  -3  -1 1710.68  188.05
   2  -3  -1 1393.76  153.31
  -2   2   1 1653.39  181.85
  -2   2   1 1576.11  173.27
   2  -2  -1 1599.16  175.81
   2  -2  -1 1393.08  153.24
  -2   1   1   19.66    2.61
  -2   1   1   17.69    2.51
   2  -1  -1   22.61    2.85
   2  -1  -1   17.15    2.30
  -2   0   1    0.44    1.15
  -2   0   1    0.00    1.25
   2   0  -1    0.92    0.98
   2   0  -1    0.85    1.08
  -2  -1   1   32.23    3.97
  -2  -1   1   29.39    3.66
   2   1  -1   26.84    3.32
   2   1  -1   32.84    4.03
  -2  -2   1 1765.25  194.12
  -2  -2   1 1679.83  184.73
  -2  -3   1 1452.40  159.81
  -2  -3   1 1368.34  150.56
   2   3  -1 1333.09  146.66
   2   3  -1 1309.70  144.16
  -2  -4   1 1332.41  146.63
  -2  -4   1 1292.07  142.19
   2   4  -1 1342.92  147.85
   2   4  -1 1280.21  140.83
  -2  -5   1  761.28   83.96
  -2  -5   1  748.40   82.53
   2   5  -1  767.72   84.60
   2   5  -1  719.25   79.45
  -2  -6   1 3735.22  410.81
  -2  -6   1 3326.45  365.73
  -2  -7   1  349.46   38.84
  -2  -7   1  387.76   43.01
   2   7  -1  379.28   42.10
   2   7  -1  342.68   38.30
  -2  -8   1 3166.12  348.10
  -2  -8   1 3058.68  336.34
   2   8  -1 2857.34  314.44
   2   8  -1 3396.27  373.52
  -2  -9   1 2862.76  314.85
  -2  -9   1 3115.62  342.68
   2   9  -1 3043.76  334.71
   2   9  -1 2566.18  282.55
  -2 -10   1   48.57    6.47
  -2 -10   1   49.35    6.37
  -2 -11   1  303.43   33.86
  -2 -11   1  211.50   23.73
   2  11  -1  201.17   23.46
   2  11  -1  262.01   29.42
  -2 -12   1 3388.47  372.51
  -2 -12   1 3396.27  373.52
   2  12  -1 3150.87  346.74
   2  12  -1 4047.05  445.04
  -2 -13   1   38.13    5.63
  -2 -13   1   40.47    5.56
   2  13  -1   40.57    6.37
   2  13  -1   41.11    7.36
  -2 -14   1   71.11    8.71
  -2 -14   1   78.03    9.29
  -2 -15   1  337.12   37.49
  -2 -15   1  324.07   36.03
   2  15  -1  305.66   34.78
   2  15  -1  449.45   49.99
  -2 -16   1 1401.22  154.22
  -2 -16   1 1347.32  148.32
   2  16  -1 1263.60  139.68
   2  16  -1 1583.57  174.36
  -2 -17   1  854.83   94.23
  -2 -17   1  871.78   96.13
   2  17  -1  857.88   94.74
   2  17  -1 1169.37  129.41
  -2 -18   1   29.39    4.58
  -2 -18   1   42.94    5.49
   2  18  -1   30.61    7.39
   2  18  -1   32.57    5.66
  -1  18   1   11.12    8.78
  -1  18   1    8.13    4.71
   1 -18  -1    8.24    2.91
   1 -18  -1   11.52    3.80
  -1  17   1  414.20   47.08
  -1  17   1  273.09   30.81
   1 -17  -1  369.45   41.05
   1 -17  -1  397.93   44.10
  -1  16   1  498.59   55.35
  -1  16   1  530.79   59.49
   1 -16  -1  361.32   40.13
   1 -16  -1  411.15   45.55
  -1  15   1  647.73   72.33
  -1  15   1  758.23   83.89
   1 -15  -1  623.67   68.91
   1 -15  -1  686.37   75.76
  -1  14   1  467.41   52.06
  -1  14   1  360.64   40.98
   1 -14  -1  391.15   43.35
   1 -14  -1  384.71   42.74
  -1  13   1 1244.62  137.34
  -1  13   1 1079.89  119.58
   1 -13  -1 1309.02  144.16
   1 -13  -1 1219.20  134.26
  -1  12   1  197.88   22.64
  -1  12   1  201.34   23.49
   1 -12  -1  202.08   22.68
   1 -12  -1  219.47   24.64
  -1  11   1  126.39   14.81
  -1  11   1  130.63   15.93
   1 -11  -1  139.65   15.90
   1 -11  -1  123.55   14.17
  -1  10   1   64.91    9.19
  -1  10   1   45.76    6.54
   1 -10  -1   58.50    7.36
   1 -10  -1   57.76    7.15
  -1   9   1 3124.77  344.03
  -1   9   1 2690.58  295.94
   1  -9  -1 3674.21  404.03
   1  -9  -1 3086.47  339.29
  -1   8   1    3.93    3.93
  -1   8   1   -1.56    3.19
   1  -8  -1    2.34    2.34
   1  -8  -1    4.85    2.54
  -1   6   1 4386.00  481.99
  -1   6   1 6575.61  722.98
   1  -6  -1 7911.07  869.40
   1  -5  -1 2390.61  262.82
   1  -5  -1 3369.83  370.47
  -1   3   1 1181.24  129.92
  -1   3   1 1781.18  195.91
   1  -3  -1 1274.79  140.22
   1  -3  -1 1482.22  162.97
  -1   2   1 1239.88  136.33
  -1   2   1  906.35   99.65
   1  -2  -1  923.98  101.62
   1  -2  -1 1079.55  118.70
  -1   0   1    1.46    0.54
  -1   0   1    1.25    0.54
   1   0  -1    1.29    0.47
   1   0  -1    1.02    0.47
  -1  -2   1  937.53  103.18
  -1  -2   1  675.53   74.37
   1   2  -1  706.03   77.75
   1   2  -1  828.05   91.11
  -1  -3   1 1337.15  147.14
  -1  -3   1 1079.55  118.80
   1   3  -1 1273.77  140.12
   1   3  -1 1111.75  122.43
  -1  -4   1  185.13   20.68
  -1  -4   1  216.25   24.10
   1   4  -1  236.55   26.27
   1   4  -1  187.24   21.01
  -1  -5   1 2513.65  276.38
  -1  -5   1 2688.21  295.56
   1   5  -1 2190.29  240.99
   1   5  -1 2451.96  269.60
  -1  -6   1 4555.48  500.63
   1   6  -1 5030.01  552.83
   1   6  -1 4287.71  471.48
  -1  -7   1   40.03    5.29
  -1  -7   1   35.62    5.05
   1   7  -1   33.35    4.85
   1   7  -1   30.84    4.75
  -1  -8   1    2.44    3.12
  -1  -8   1    2.61    2.58
   1   8  -1    0.14    3.32
   1   8  -1   -0.17    2.68
  -1  -9   1 3199.34  351.83
  -1  -9   1 3222.39  354.20
   1   9  -1 2377.39  261.77
   1   9  -1 2706.51  297.67
  -1 -10   1   47.93    6.17
  -1 -10   1   57.52    7.66
   1  10  -1   44.27    6.37
   1  10  -1   38.30    6.61
  -1 -11   1  121.68   14.00
  -1 -11   1  136.94   15.80
   1  11  -1  124.46   14.51
   1  11  -1   95.01   11.93
  -1 -12   1  183.95   20.68
  -1 -12   1  197.88   22.30
   1  12  -1  206.83   23.52
   1  12  -1  148.49   17.63
  -1 -13   1 1096.50  120.84
  -1 -13   1 1097.86  120.94
  -1 -14   1  357.59   39.79
  -1 -14   1  388.77   43.11
  -1 -15   1  562.66   62.16
  -1 -15   1  664.34   73.45
   1  15  -1  676.54   74.87
   1  15  -1  527.74   59.18
  -1 -16   1  375.89   41.69
  -1 -16   1  421.31   46.71
   1  16  -1  380.98   42.44
   1  16  -1  336.71   38.34
  -1 -17   1  313.83   34.95
  -1 -17   1  386.74   42.88
   1  17  -1  356.24   40.50
   1  17  -1  436.91   48.57
  -1 -18   1   10.13    2.91
  -1 -18   1   10.00    3.25
   1  18  -1   -2.03    6.41
   1  18  -1    6.81    4.44
   0  18   1   18.85    5.08
   0  18   1   16.81    7.39
   0 -18  -1   22.71    4.17
   0 -18  -1   28.57    4.41
   0  17   1   24.84    5.80
   0  17   1   34.84    8.78
   0  16   1  377.25   42.91
   0  16   1  367.42   41.01
   0 -16  -1  380.98   42.27
   0 -16  -1  372.84   41.39
   0  15   1  303.16   34.98
   0  15   1  408.77   45.62
   0 -15  -1  335.83   37.28
   0 -15  -1  328.85   36.61
   0  14   1    0.37    5.80
   0  14   1    0.64    5.12
   0 -14  -1    0.78    2.71
   0 -14  -1    0.54    2.98
   0  13   1 2715.32  298.78
   0  13   1 2408.57  265.40
   0 -13  -1 2724.13  299.60
   0  12   1   80.30   11.19
   0  12   1   77.18    9.80
   0 -12  -1   90.91   10.58
   0 -12  -1   97.21   11.39
   0  11   1  122.97   14.64
   0  11   1  123.85   15.18
   0 -11  -1  141.38   16.10
   0 -11  -1  147.88   16.81
   0  10   1 1593.06  175.64
   0  10   1 1359.86  149.82
   0 -10  -1 1418.50  156.15
   0 -10  -1 1833.71  201.74
   0   9   1  206.08   23.69
   0   9   1  167.24   19.05
   0  -9  -1  190.46   21.35
   0  -9  -1  249.06   27.79
   0   8   1   10.00    3.73
   0   8   1    7.08    3.56
   0  -8  -1   10.34    2.47
   0  -8  -1   10.00    2.54
   0  -7  -1  292.21   32.40
   0  -7  -1  261.57   29.05
   0  -6  -1  277.84   30.81
   0  -6  -1  406.06   44.91
   0   4   1    9.93    2.30
   0   4   1   13.39    2.58
   0  -4  -1   14.95    2.41
   0  -4  -1   12.71    2.03
   0   3   1   11.08    1.93
   0   3   1   10.54    2.34
   0  -3  -1   11.02    1.83
   0  -3  -1   12.10    2.03
   0   0   1    4.68    0.98
   0   0   1    2.27    0.68
   0   0  -1    1.32    0.64
   0   0  -1    1.83    0.68
   0  -1   1 1596.45  175.51
   0   1  -1 3101.05  340.64
   0   2  -1 3396.27  373.18
   0   3  -1   10.03    2.47
   0   3  -1   13.49    2.27
   0  -4   1    6.54    2.10
   0  -4   1   11.86    2.58
   0   4  -1   11.63    2.85
   0   4  -1    8.88    1.97
   0  -5   1 2346.88  258.04
   0  -5   1 2507.55  275.74
   0   5  -1 2606.86  286.62
   0   5  -1 2185.21  240.45
   0  -6   1  358.27   39.69
   0  -6   1  372.51   41.25
   0   6  -1  391.83   43.35
   0   6  -1  353.18   39.35
   0  -7   1  297.33   33.05
   0  -7   1  280.21   31.22
   0   7  -1  308.95   34.34
   0   7  -1  270.21   30.40
   0  -8   1    9.80    2.88
   0  -8   1   10.30    3.12
   0   8  -1   10.54    3.97
   0   8  -1    7.80    2.95
   0  -9   1  230.69   25.83
   0  -9   1  266.85   29.83
   0   9  -1  241.40   27.56
   0   9  -1  221.16   24.88
   0 -10   1 1858.46  204.52
   0 -10   1 1571.03  172.93
   0  10  -1 1485.28  163.85
   0  10  -1 1667.97  183.68
   0 -11   1  142.09   16.24
   0 -11   1  142.36   16.44
   0  11  -1  134.46   15.49
   0  11  -1  107.35   13.39
   0 -12   1   89.18   10.88
   0 -12   1   77.75    9.25
   0  12  -1   79.18   10.98
   0  12  -1   89.79   10.95
   0 -13   1 2615.67  287.73
   0 -13   1 2235.71  245.91
   0  13  -1 2415.35  265.77
   0  13  -1 2540.42  279.90
   0 -14   1    0.64    2.81
   0 -14   1   -1.22    3.63
   0  14  -1    4.10    4.44
   0  14  -1    1.32    6.20
   0 -15   1  326.51   36.23
   0 -15   1  323.32   36.03
   0  15  -1  331.83   37.18
   0  15  -1  334.58   38.13
   0 -16   1  330.20   36.67
   0 -16   1  389.79   43.28
   0  16  -1  375.56   42.61
   0  16  -1  437.92   48.64
   0 -17   1   16.98    4.58
   0 -17   1   18.74    3.66
   0  17  -1   27.96    7.42
   0  17  -1   23.66    5.52
   0 -18   1   26.84    4.44
   0 -18   1   18.98    3.56
   0  18  -1   29.45    5.36
   0  18  -1   24.71    7.42
   1  18   1   38.47    8.44
   1  18   1   36.20    6.27
  -1 -18  -1   37.93    5.39
  -1 -18  -1   40.03    5.25
   1  17   1  342.68   38.34
   1  17   1  303.39   34.95
  -1 -17  -1  327.87   36.44
  -1 -17  -1  342.00   37.93
   1  16   1 1354.44  149.65
   1  16   1 1754.40  193.17
  -1 -16  -1 1313.43  144.60
  -1 -16  -1 1590.69  175.07
   1  15   1   56.54    8.17
   1  15   1   48.61    8.61
  -1 -15  -1   50.20    6.71
  -1 -15  -1   54.98    6.85
   1  14   1   13.39    4.75
   1  14   1   15.80    6.00
  -1 -14  -1   18.17    3.97
  -1 -14  -1   20.61    4.07
   1  13   1  296.78   33.79
   1  13   1  388.77   43.32
  -1 -13  -1  364.71   40.47
  -1 -13  -1  483.68   53.52
   1  12   1 2676.34  294.78
   1  12   1 3177.65  349.46
  -1 -12  -1 4823.25  530.46
  -1 -12  -1 3406.44  374.54
   1  11   1   12.61    4.27
   1  11   1    8.00    5.36
  -1 -11  -1   14.81    3.05
  -1 -11  -1   12.00    3.46
   1  10   1   80.40   10.54
   1  10   1   66.94    8.37
  -1 -10  -1   78.91    9.32
  -1 -10  -1  109.75   12.64
   1   9   1 1441.55  158.97
   1   9   1 1277.16  140.73
  -1  -9  -1 1485.95  163.58
  -1  -9  -1 1998.78  219.88
  -1  -8  -1 2871.92  315.80
  -1  -8  -1 2268.59  249.50
   1   7   1   54.50    7.29
   1   7   1   40.10    5.39
  -1  -7  -1   48.91    6.13
  -1  -7  -1   36.44    4.78
   1   6   1 1042.61  114.87
   1   6   1 1398.50  154.12
  -1  -6  -1 1252.08  137.85
  -1  -6  -1  976.51  107.55
   1   5   1   52.40    6.47
   1   5   1   59.86    7.36
  -1  -5  -1   60.20    7.05
  -1  -5  -1   64.60    7.63
   1   4   1 1242.59  136.73
   1   4   1 1275.80  140.49
  -1  -4  -1 1322.58  145.51
  -1  -4  -1 1162.26  127.89
   1   3   1 2162.50  237.77
   1   3   1 2459.42  270.45
  -1  -3  -1 2554.32  280.82
  -1  -3  -1 2440.09  268.24
   1   2   1 1998.11  219.74
   1   2   1 1859.47  204.42
  -1  -2  -1 1907.27  209.71
  -1  -2  -1 1919.81  211.06
   1   1   1   18.37    2.75
   1   1   1   12.54    2.00
  -1  -1  -1   20.78    2.71
  -1  -1  -1   19.12    2.75
   1   0   1    0.75    1.19
   1   0   1    0.58    1.46
  -1   0  -1    0.88    1.29
  -1   0  -1    0.92    1.36
   1  -1   1   32.95    4.14
   1  -1   1   29.49    3.76
  -1   1  -1   26.34    3.53
  -1   1  -1   37.18    4.44
   1  -2   1 2009.63  221.03
   1  -2   1 2019.80  222.08
  -1   2  -1 2094.71  230.38
  -1   2  -1 2197.75  241.60
   1  -3   1 2668.21  293.36
   1  -3   1 2810.91  309.02
  -1   3  -1 2931.23  322.34
  -1   3  -1 2579.74  283.56
   1  -4   1 1551.03  170.63
   1  -4   1 1284.28  141.38
  -1   4  -1 1436.81  158.05
  -1   4  -1 1401.55  154.36
   1  -5   1   71.93    8.61
   1  -5   1   74.26    8.68
  -1   5  -1   80.84    9.39
  -1   5  -1   77.08    9.49
   1  -6   1 1275.13  140.36
   1  -6   1 1409.35  155.10
   1  -7   1   53.18    6.78
   1  -7   1   58.33    7.29
  -1   7  -1   49.05    6.20
  -1   7  -1   47.11    6.91
   1  -8   1 3197.99  351.49
   1  -8   1 3409.83  374.88
  -1   8  -1 3073.93  338.00
  -1   8  -1 3073.93  338.27
   1  -9   1 2171.65  238.96
   1  -9   1 1983.19  218.25
  -1   9  -1 2140.80  235.57
  -1   9  -1 2080.13  229.20
   1 -10   1  102.09   11.93
   1 -10   1  124.43   14.61
  -1  10  -1  108.29   12.81
  -1  10  -1  118.39   14.44
   1 -11   1   12.98    3.46
   1 -11   1   14.88    4.07
  -1  11  -1   11.15    5.15
  -1  11  -1   12.10    3.86
   1 -12   1 4094.51  450.12
   1 -12   1 3367.12  370.13
  -1  12  -1 3284.08  361.66
  -1  12  -1 3735.22  410.81
   1 -13   1  401.99   44.57
   1 -13   1  459.95   51.05
  -1  13  -1  314.31   35.86
  -1  13  -1  432.50   48.16
   1 -14   1   12.81    2.98
   1 -14   1    9.22    4.61
  -1  14  -1   16.81    4.68
  -1  14  -1   16.41    6.61
   1 -15   1   53.11    6.71
   1 -15   1   52.94    7.46
  -1  15  -1   61.65   10.44
  -1  15  -1   52.71    7.56
   1 -16   1 1748.98  192.49
   1 -16   1 1739.15  191.37
  -1  16  -1 1706.61  188.35
  -1  16  -1 1762.54  194.05
   1 -17   1  370.81   41.11
   1 -17   1  377.93   41.96
  -1  17  -1  370.13   41.25
  -1  17  -1  299.80   34.44
   1 -18   1   39.49    5.12
   1 -18   1   42.13    6.03
  -1  18  -1   36.71    6.44
  -1  18  -1   48.23    8.61
   2  18   1    8.03    6.68
   2  18   1   12.27    4.91
  -2 -18  -1   12.34    3.42
  -2 -18  -1   12.54    2.95
   2  17   1  808.39   89.72
   2  17   1  951.77  105.01
  -2 -17  -1  824.32   90.84
  -2 -17  -1 1026.00  113.04
   2  16   1  124.46   15.46
   2  16   1  161.75   18.68
  -2 -16  -1  144.93   16.57
  -2 -16  -1  160.29   18.17
   2  15   1  776.19   86.19
   2  15   1 1019.56  112.46
  -2 -15  -1  974.48  107.38
  -2 -15  -1  887.37   97.79
   2  14   1  217.33   25.25
   2  14   1  195.95   22.30
  -2 -14  -1  254.38   28.44
  -2 -14  -1  211.40   23.69
   2  13   1  666.04   74.06
   2  13   1  661.63   73.15
  -2 -13  -1  711.12   78.50
  -2 -13  -1  607.40   67.11
   2  12   1  356.91   40.40
   2  12   1  273.70   30.74
  -2 -12  -1  374.88   41.59
  -2 -12  -1  306.14   34.06
   2  11   1  330.98   37.01
   2  11   1  465.72   52.10
  -2 -11  -1  527.40   58.30
  -2 -11  -1  412.16   45.72
   2  10   1    4.37    5.25
   2  10   1    2.10    3.53
  -2 -10  -1    2.85    3.25
  -2 -10  -1    4.68    2.68
   2   9   1 3035.97  333.93
   2   9   1 3806.40  418.94
  -2  -9  -1 3256.62  358.27
  -2  -9  -1 4297.88  472.50
   2   8   1   67.01    8.88
   2   8   1   54.98    7.15
  -2  -8  -1   55.32    6.81
  -2  -8  -1   61.35    7.63
   2   7   1  203.67   22.91
   2   7   1  154.56   17.93
  -2  -7  -1  138.90   15.73
  -2  -7  -1  154.09   17.46
   2   6   1 5253.71  577.57
   2   6   1 5165.58  567.74
  -2  -6  -1 5043.56  554.52
   2   5   1 4036.88  444.02
   2   5   1 4155.52  456.56
  -2  -5  -1 4128.40  453.85
  -2  -5  -1 4057.22  445.72
   2   4   1   19.86    3.46
   2   4   1   20.64    3.59
  -2  -4  -1   20.64    3.42
  -2  -4  -1   23.46    3.53
   2   3   1 1308.34  144.09
   2   3   1 1434.43  157.78
  -2  -3  -1 1313.43  144.53
  -2  -3  -1 1400.88  154.15
   2   2   1 1645.94  181.13
   2   2   1 1783.21  196.12
  -2  -2  -1 2108.94  231.88
  -2  -2  -1 2035.73  223.91
   2   1   1  853.81   94.09
   2   1   1  914.15  100.74
  -2  -1  -1 1042.61  114.84
  -2  -1  -1 1029.73  113.34
   2   0   1    1.12    2.10
   2   0   1    1.39    1.86
  -2   0  -1    0.37    1.86
  -2   0  -1    0.20    2.07
   2  -1   1 1505.95  165.75
   2  -1   1 1433.08  157.71
  -2   1  -1 1342.58  147.71
  -2   1  -1 1727.96  190.08
   2  -2   1 2093.69  230.28
   2  -2   1 2460.43  270.55
  -2   2  -1 2091.32  229.94
  -2   2  -1 2715.66  298.65
   2  -3   1 1678.82  184.76
   2  -3   1 1658.14  182.46
  -2   3  -1 1404.61  154.53
  -2   3  -1 1411.38  155.44
  -2   4  -1   23.76    4.58
  -2   4  -1   32.88    4.54
   2  -5   1 5131.69  564.01
   2  -5   1 4684.28  514.86
  -2   5  -1 4348.72  477.92
  -2   5  -1 4857.14  534.18
   2  -6   1 6094.31  669.76
   2  -6   1 6819.66  749.76
  -2   6  -1 6345.13  697.56
  -2   6  -1 6067.19  666.71
   2  -7   1  177.88   20.20
   2  -7   1  161.24   18.27
  -2   7  -1  190.25   21.42
  -2   7  -1  188.73   21.79
   2  -8   1   79.04    9.63
   2  -8   1   86.40   10.47
  -2   8  -1   73.08    8.98
  -2   8  -1   73.89   10.03
   2  -9   1 5280.83  580.62
   2  -9   1 4318.21  474.87
  -2   9  -1 4904.59  539.27
  -2   9  -1 4945.27  543.67
   2 -10   1    4.58    3.15
   2 -10   1    6.37    4.41
  -2  10  -1   -0.03    5.52
  -2  10  -1    3.76    3.63
   2 -11   1  608.75   67.38
   2 -11   1  590.79   65.35
  -2  11  -1  466.73   52.23
  -2  11  -1  598.92   66.33
   2 -12   1  461.99   51.22
   2 -12   1  501.98   55.76
  -2  12  -1  506.05   56.23
  -2  12  -1  400.64   45.11
  -2  13  -1  750.43   83.42
  -2  13  -1  849.41   93.86
   2 -14   1  238.04   26.57
   2 -14   1  291.77   32.67
  -2  14  -1  309.60   35.35
  -2  14  -1  255.67   28.84
  -2  15  -1 1091.08  120.39
  -2  15  -1 1144.29  126.63
   2 -16   1  171.71   19.35
   2 -16   1  166.56   19.05
  -2  16  -1  159.81   18.47
  -2  16  -1  161.81   19.66
   2 -17   1 1133.45  124.83
   2 -17   1 1029.73  113.41
  -2  17  -1  736.54   81.86
  -2  17  -1  999.56  110.26
   2 -18   1   11.19    3.53
   2 -18   1   15.80    3.36
  -2  18  -1   16.81    4.71
  -2  18  -1   20.51    6.03
   3  17   1   28.64    5.12
   3  17   1   24.64    6.27
  -3 -17  -1   28.64    4.24
  -3 -17  -1   30.71    4.58
   3  16   1  211.30   24.64
   3  16   1  260.79   29.42
  -3 -16  -1  247.50   27.59
  -3 -16  -1  265.16   29.56
   3  15   1  197.88   23.15
   3  15   1  169.64   19.42
  -3 -15  -1  175.41   19.83
  -3 -15  -1  193.00   21.66
   3  14   1   18.13    4.75
   3  14   1   29.01    6.44
  -3 -14  -1   29.59    4.78
  -3 -14  -1   26.64    4.34
   3  13   1 1043.96  115.11
   3  13   1 1438.50  158.87
  -3 -13  -1 1273.77  140.29
  -3 -13  -1 1392.74  153.34
   3  12   1   60.94    9.08
   3  12   1   85.08   10.74
  -3 -12  -1   78.13    9.35
  -3 -12  -1  119.85   13.90
   3  11   1    2.98    4.85
   3  11   1   -0.17    3.46
  -3 -11  -1    3.42    2.91
  -3 -11  -1    9.42    3.02
   3  10   1 1803.89  198.93
   3  10   1 1554.42  171.24
  -3 -10  -1 1665.26  183.34
  -3 -10  -1 1868.29  205.61
   3   9   1  640.61   71.18
   3   9   1  572.15   63.38
  -3  -9  -1  655.87   72.50
  -3  -9  -1  606.38   67.01
   3   8   1    8.17    4.34
   3   8   1    6.58    3.36
  -3  -8  -1    8.58    2.78
  -3  -8  -1    9.80    3.22
   3   7   1  558.93   61.79
   3   7   1  662.31   73.42
  -3  -7  -1  559.27   61.82
  -3  -7  -1  695.18   76.77
   3   6   1   72.60    8.81
   3   6   1   72.33    9.42
  -3  -6  -1   69.04    8.30
  -3  -6  -1   93.04   11.05
   3   5   1 3501.34  385.05
   3   5   1 3170.53  348.78
  -3  -5  -1 3211.88  353.18
  -3  -5  -1 3283.74  360.98
   3   4   1   54.03    7.12
   3   4   1   52.16    6.44
  -3  -4  -1   62.77    7.80
  -3  -4  -1   59.96    7.29
   3   3   1  737.21   81.28
   3   3   1  754.50   83.35
  -3  -3  -1  792.80   87.41
  -3  -3  -1  796.53   87.86
   3   2   1 2257.74  248.45
   3   2   1 2396.37  263.57
  -3  -2  -1 2783.11  306.04
  -3  -2  -1 2455.35  270.04
   3   1   1 2527.20  278.07
   3   1   1 2578.05  283.56
  -3  -1  -1 3389.49  372.84
  -3  -1  -1 3470.84  381.32
   3   0   1    1.46    2.10
   3   0   1    0.98    2.81
  -3   0  -1    6.00    2.54
  -3   0  -1    1.05    2.27
   3  -1   1 3187.14  350.47
   3  -1   1 2767.18  304.34
  -3   1  -1 2487.55  273.57
  -3   1  -1 3306.79  363.69
   3  -2   1 3094.61  340.30
   3  -2   1 3501.34  385.05
  -3   2  -1 3018.68  331.87
  -3   2  -1 3786.06  416.57
  -3   3  -1  970.41  107.04
  -3   3  -1  875.17   96.43
   3  -4   1   53.69    7.08
   3  -4   1   67.76    8.51
  -3   4  -1   63.42    8.17
  -3   4  -1   71.28    8.54
   3  -5   1 4823.25  530.12
   3  -5   1 4162.30  457.58
  -3   5  -1 4114.84  452.16
  -3   5  -1 3874.19  426.06
   3  -6   1   81.75    9.83
   3  -6   1   86.43   10.61
  -3   6  -1   78.40   10.24
  -3   6  -1   92.87   11.12
   3  -7   1  771.11   85.21
   3  -7   1  747.72   82.64
  -3   7  -1  767.04   84.64
  -3   7  -1  754.50   83.58
   3  -8   1    4.85    3.39
   3  -8   1    9.97    3.97
  -3   8  -1    8.00    5.39
  -3   8  -1   14.27    3.56
   3  -9   1  772.47   85.28
   3  -9   1  818.56   90.43
  -3   9  -1  909.74  100.36
  -3   9  -1  757.55   84.09
   3 -10   1 2210.63  243.23
   3 -10   1 2346.54  258.21
  -3  10  -1 2372.31  261.02
  -3  10  -1 2103.18  231.77
   3 -11   1    4.54    4.64
   3 -11   1    6.17    3.49
  -3  11  -1    1.53    5.46
  -3  11  -1    0.61    3.69
   3 -12   1   92.91   11.42
   3 -12   1   95.18   11.35
  -3  12  -1   99.55   12.41
  -3  12  -1   93.55   12.44
   3 -13   1 2276.72  250.42
   3 -13   1 1700.85  187.30
  -3  13  -1 1698.47  187.40
  -3  13  -1 1826.94  201.23
   3 -14   1   37.79    5.42
   3 -14   1   42.57    6.51
  -3  14  -1   34.17    7.46
  -3  14  -1   38.61    6.54
   3 -15   1  208.93   23.46
   3 -15   1  230.28   26.03
  -3  15  -1  232.52   26.95
  -3  15  -1  223.44   25.39
   3 -16   1  271.91   30.27
   3 -16   1  295.29   32.98
  -3  16  -1  307.29   34.47
  -3  16  -1  346.41   39.32
   3 -17   1   33.79    5.15
   3 -17   1   35.08    5.08
  -3  17  -1   27.39    5.52
  -3  17  -1   37.79    8.07
   4  17   1   94.77   11.25
   4  17   1  106.19   13.59
  -4 -17  -1   87.58   10.17
  -4 -17  -1  130.36   14.78
   4  16   1 1076.50  118.67
   4  16   1 1313.43  145.07
  -4 -16  -1  998.88  110.02
  -4 -16  -1 1115.48  122.80
   4  15   1   30.47    5.19
   4  15   1   29.79    6.81
  -4 -15  -1   27.35    4.47
  -4 -15  -1   22.54    3.86
   4  14   1   11.63    6.47
   4  14   1    8.00    4.00
  -4 -14  -1    1.66    3.29
  -4 -14  -1    0.61    2.47
  -4 -13  -1  884.32   97.48
  -4 -13  -1  689.76   76.16
   4  12   1 1724.23  190.18
   4  12   1 1206.66  133.04
  -4 -12  -1 1543.57  169.88
  -4 -12  -1 1313.77  144.70
   4  11   1  140.39   16.91
   4  11   1  118.09   13.93
  -4 -11  -1  145.10   16.61
  -4 -11  -1  139.61   16.00
   4  10   1  385.05   43.28
   4  10   1  461.31   51.18
  -4 -10  -1  419.62   46.61
  -4 -10  -1  399.28   44.30
   4   9   1  833.48   91.99
   4   9   1  763.99   84.70
  -4  -9  -1  791.45   87.35
  -4  -9  -1  872.12   96.23
  -4  -8  -1 1583.57  174.32
  -4  -8  -1 1475.45  162.46
   4   7   1   37.01    5.76
   4   7   1   42.00    6.75
  -4  -7  -1   49.01    6.81
  -4  -7  -1   53.89    7.08
   4   6   1  435.21   48.33
   4   6   1  457.58   51.08
  -4  -6  -1  431.82   47.89
  -4  -6  -1  442.67   49.11
   4   5   1  104.50   12.24
   4   5   1  129.14   15.39
  -4  -5  -1  129.89   15.02
  -4  -5  -1  114.26   13.19
   4   4   1  495.54   55.08
   4   4   1  486.73   53.89
  -4  -4  -1  536.90   59.38
  -4  -4  -1  554.18   61.32
   4   3   1 1719.83  189.44
   4   3   1 1973.02  217.10
  -4  -3  -1 1996.07  219.67
  -4  -3  -1 1983.19  218.18
   4   2   1 1194.12  131.58
   4   2   1  983.29  108.50
  -4  -2  -1 1065.32  117.38
  -4  -2  -1 1276.82  140.70
   4   1   1   29.15    4.71
   4   1   1   37.69    5.66
  -4  -1  -1   50.54    6.61
  -4  -1  -1   46.74    6.13
   4   0   1   10.71    3.80
   4   0   1    1.22    2.85
  -4   0  -1   -1.19    2.88
  -4   0  -1    3.69    3.12
   4  -1   1   28.47    4.88
   4  -1   1   30.20    4.71
  -4   1  -1   25.49    4.17
  -4   1  -1   43.08    5.97
   4  -2   1 1331.73  146.76
   4  -2   1 1573.74  173.34
  -4   2  -1 1538.15  169.41
  -4   2  -1 1237.16  136.29
   4  -3   1 2471.28  271.94
   4  -3   1 2741.08  301.60
  -4   3  -1 2319.77  255.19
  -4   3  -1 2759.72  303.56
   4  -4   1  691.80   76.57
   4  -4   1  582.99   64.54
  -4   4  -1  604.69   66.91
  -4   4  -1  697.22   77.18
   4  -5   1  144.36   16.74
   4  -5   1  147.14   17.12
  -4   5  -1  144.16   16.81
  -4   5  -1  146.09   16.81
   4  -6   1  570.45   63.18
   4  -6   1  613.84   68.03
  -4   6  -1  587.74   65.28
  -4   6  -1  672.14   74.26
   4  -7   1   61.32    8.61
   4  -7   1   53.66    7.29
   4  -8   1 1943.53  213.94
   4  -8   1 2260.11  248.79
  -4   8  -1 1955.40  215.16
  -4   8  -1 1821.51  200.73
   4  -9   1 1230.72  135.61
   4  -9   1 1195.13  131.78
  -4   9  -1 1016.51  112.40
  -4   9  -1 1109.38  122.33
   4 -10   1  594.86   65.99
   4 -10   1  602.99   66.77
  -4  10  -1  629.77   69.76
  -4  10  -1  540.28   60.27
   4 -11   1  168.97   19.32
   4 -11   1  187.64   21.59
  -4  11  -1  210.89   24.07
  -4  11  -1  178.76   21.22
   4 -12   1 1995.39  219.57
   4 -12   1 2015.73  221.91
  -4  12  -1 1893.37  208.76
  -4  12  -1 2198.76  242.04
   4 -13   1 1021.93  112.63
   4 -13   1 1037.86  114.50
  -4  13  -1  947.36  104.87
  -4  13  -1 1048.71  115.68
   4 -14   1    4.34    4.07
   4 -14   1    0.64    3.36
  -4  14  -1    6.75    6.30
  -4  14  -1   -0.54    3.90
   4 -15   1   31.08    5.76
   4 -15   1   32.23    4.91
  -4  15  -1   38.67    6.47
  -4  15  -1   22.88    6.85
   4 -16   1 1457.82  160.42
   4 -16   1 1308.00  144.02
  -4  16  -1 1346.31  148.60
  -4  16  -1 1281.91  141.27
   4 -17   1  127.00   14.64
   4 -17   1  152.90   17.22
  -4  17  -1  115.75   13.69
  -4  17  -1  177.78   20.91
   5  16   1   19.32    4.07
   5  16   1   13.93    5.83
   5  15   1  896.86   99.35
   5  15   1  676.20   74.70
  -5 -15  -1  650.78   71.82
  -5 -15  -1  850.42   93.72
   5  14   1  220.32   25.49
   5  14   1  190.69   21.59
  -5 -14  -1  123.95   14.20
  -5 -14  -1  121.68   13.96
   5  13   1  371.15   41.86
   5  13   1  258.25   28.95
  -5 -13  -1  327.26   36.40
  -5 -13  -1  251.64   28.10
   5  12   1  559.94   62.40
   5  12   1  579.60   64.13
  -5 -12  -1  522.66   57.79
  -5 -12  -1  475.55   52.67
   5  11   1  465.04   51.59
   5  11   1  584.35   65.11
  -5 -11  -1  527.07   58.30
  -5 -11  -1  481.99   53.38
   5  10   1   14.13    5.42
   5  10   1   11.73    3.63
  -5 -10  -1   15.76    3.80
  -5 -10  -1    5.22    2.81
   5   9   1 2953.94  324.85
   5   9   1 3347.80  368.44
  -5  -9  -1 3332.55  366.40
  -5  -9  -1 2882.42  316.99
   5   8   1  379.62   42.71
   5   8   1  417.92   46.44
  -5  -8  -1  453.51   50.27
  -5  -8  -1  389.79   43.25
   5   7   1  501.98   55.59
   5   7   1  452.84   50.61
  -5  -7  -1  557.57   61.69
  -5  -7  -1  509.44   56.40
   5   6   1 3535.24  388.77
   5   6   1 2448.91  269.70
  -5  -6  -1 3691.16  405.72
  -5  -6  -1 3298.31  362.68
   5   5   1 1785.25  196.56
   5   5   1 1525.95  168.29
  -5  -5  -1 1567.30  172.59
  -5  -5  -1 1820.50  200.45
   5   4   1   17.12    4.64
   5   4   1   24.00    4.27
  -5  -4  -1   25.39    4.41
  -5  -4  -1   27.73    4.91
  -5  -3  -1  484.70   53.72
  -5  -3  -1  472.83   52.47
  -5  -2  -1  915.50  101.01
  -5  -2  -1 1030.07  113.58
   5   1   1  234.89   26.47
   5   1   1  224.05   25.49
  -5  -1  -1  265.23   29.69
  -5  -1  -1  263.40   29.45
   5   0   1   -0.44    4.17
   5   0   1   11.08    3.73
  -5   0  -1    2.24    3.32
  -5   0  -1    2.37    2.95
   5  -1   1  216.55   24.47
   5  -1   1  229.30   26.03
  -5   1  -1  218.28   24.57
  -5   1  -1  228.21   25.73
   5  -2   1  852.80   94.16
   5  -2   1  954.82  105.45
  -5   2  -1  735.86   81.28
  -5   2  -1  997.87  110.19
   5  -3   1  644.34   71.38
   5  -3   1  608.41   67.35
  -5   3  -1  627.06   69.45
  -5   3  -1  680.27   75.31
   5  -4   1   27.86    5.22
   5  -4   1   30.88    5.69
  -5   4  -1   30.40    5.49
  -5   4  -1   33.45    5.66
   5  -5   1 2027.25  223.20
   5  -5   1 2253.33  248.01
  -5   5  -1 2428.91  267.33
  -5   5  -1 2063.18  227.10
   5  -6   1 5355.40  589.09
   5  -6   1 4569.03  502.32
  -5   6  -1 4796.13  527.07
  -5   6  -1 5243.54  576.55
   5  -7   1  730.44   80.77
   5  -7   1  827.71   91.55
  -5   7  -1  691.80   76.47
  -5   7  -1  751.11   83.21
   5  -8   1  626.04   69.28
   5  -8   1  646.72   71.62
  -5   8  -1  607.40   67.45
  -5   8  -1  587.06   65.04
   5  -9   1 4874.09  535.88
   5  -9   1 4721.56  519.27
  -5   9  -1 4375.83  481.31
  -5   9  -1 5138.47  564.69
   5 -10   1   10.54    4.47
   5 -10   1   25.08    4.88
  -5  10  -1   14.07    5.08
  -5  10  -1   19.59    5.08
   5 -11   1  768.40   84.84
   5 -11   1  794.16   87.75
  -5  11  -1  727.05   80.60
  -5  11  -1  906.35  100.06
   5 -12   1  613.16   67.79
   5 -12   1  730.77   80.84
  -5  12  -1  706.37   78.30
  -5  12  -1  738.23   81.62
   5 -13   1  400.98   44.64
   5 -13   1  433.52   48.13
  -5  13  -1  379.28   42.54
  -5  13  -1  405.38   45.11
   5 -14   1  145.88   16.68
   5 -14   1  161.37   18.68
  -5  14  -1  153.85   17.86
  -5  14  -1  154.66   18.37
   5 -15   1  886.01   97.72
   5 -15   1 1061.59  116.94
  -5  15  -1  938.55  103.65
  -5  15  -1 1007.70  111.18
   5 -16   1   23.86    4.88
   5 -16   1   24.51    4.20
  -5  16  -1   30.06    5.59
  -5  16  -1   13.52    5.66
  -6 -15  -1  167.61   18.85
  -6 -15  -1  139.10   15.76
   6  14   1   51.01    7.02
   6  14   1   62.67    9.46
  -6 -14  -1   58.27    7.15
  -6 -14  -1   54.57    6.88
   6  13   1  702.98   77.65
   6  13   1  848.39   94.02
  -6 -13  -1  773.82   85.38
  -6 -13  -1  833.14   91.86
   6  12   1   14.47    5.97
   6  12   1   12.17    4.20
  -6 -12  -1   11.73    2.91
  -6 -12  -1   18.07    3.80
   6  11   1   18.07    5.42
   6  11   1   21.52    4.24
  -6 -11  -1   23.35    4.24
  -6 -11  -1   19.96    3.66
   6  10   1  870.76   96.50
   6  10   1  857.88   94.67
  -6 -10  -1  791.79   87.35
  -6 -10  -1  915.50  100.94
   6   9   1 1355.80  149.41
   6   9   1 1511.71  166.93
  -6  -9  -1 1251.40  137.85
  -6  -9  -1 1425.96  157.04
   6   8   1   20.00    6.20
   6   8   1   11.69    3.83
  -6  -8  -1   20.98    4.27
  -6  -8  -1   16.81    3.59
   6   7   1  405.72   45.11
   6   7   1  385.05   43.32
  -6  -7  -1  397.59   44.17
  -6  -7  -1  398.60   44.23
   6   6   1  440.63   48.91
   6   6   1  431.14   48.23
  -6  -6  -1  482.66   53.52
  -6  -6  -1  436.57   48.40
   6   5   1 2149.28  236.82
   6   5   1 2250.28  247.64
  -6  -5  -1 2225.20  244.89
  -6  -5  -1 2461.79  270.89
   6   4   1  161.20   18.44
   6   4   1  109.01   13.39
  -6  -4  -1  126.39   14.61
  -6  -4  -1  115.48   13.56
   6   3   1 1289.36  142.36
   6   3   1 1173.44  129.38
  -6  -3  -1 1445.62  159.24
  -6  -3  -1 1215.47  133.99
   6   2   1 1015.83  112.09
   6   2   1  986.68  109.14
  -6  -2  -1 1144.97  126.22
  -6  -2  -1 1087.01  119.78
   6   1   1 5206.26  572.49
   6   1   1 5677.40  624.34
  -6  -1  -1 5701.12  626.72
  -6  -1  -1 5490.98  603.67
   6   0   1    2.91    4.00
   6   0   1    0.68    4.71
  -6   0  -1    4.58    3.97
  -6   0  -1    6.07    3.69
   6  -1   1 5497.76  604.69
   6  -1   1 5111.35  561.98
  -6   1  -1 5633.33  619.26
  -6   1  -1 5487.59  603.33
   6  -2   1 1055.83  116.63
   6  -2   1  891.10   98.40
  -6   2  -1 1005.66  111.01
  -6   2  -1  945.33  104.40
   6  -3   1 1440.87  158.80
   6  -3   1 1534.08  169.14
  -6   3  -1 1294.79  142.77
  -6   3  -1 1636.79  180.32
   6  -4   1  161.71   18.81
   6  -4   1  142.97   16.74
  -6   4  -1  144.80   16.81
  -6   4  -1  149.61   17.39
   6  -5   1 3021.05  332.37
   6  -5   1 3403.05  374.20
  -6   5  -1 3481.01  382.67
  -6   5  -1 2921.74  321.36
   6  -6   1  634.17   70.26
   6  -6   1  632.14   69.99
  -6   6  -1  653.83   72.47
  -6   6  -1  700.95   77.55
   6  -7   1  542.66   60.20
   6  -7   1  583.33   64.74
  -6   7  -1  589.09   65.42
  -6   7  -1  607.40   67.32
   6  -8   1   20.27    4.64
   6  -8   1   21.76    5.05
  -6   8  -1   20.20    5.52
  -6   8  -1   23.46    5.66
   6  -9   1 2019.80  222.35
   6  -9   1 1954.72  215.20
  -6   9  -1 2203.51  242.59
  -6   9  -1 2337.39  257.36
   6 -10   1 1281.91  141.27
   6 -10   1 1273.09  140.29
  -6  10  -1 1517.81  167.41
  -6  10  -1 1075.15  118.77
   6 -11   1   38.17    5.86
   6 -11   1   31.62    6.10
  -6  11  -1   33.96    6.07
  -6  11  -1   23.59    6.30
   6 -12   1   22.64    4.44
   6 -12   1   15.12    4.88
  -6  12  -1   20.74    4.61
  -6  12  -1   13.39    5.83
   6 -13   1 1054.13  116.16
   6 -13   1 1097.18  120.97
  -6  13  -1 1097.52  121.14
  -6  13  -1 1118.87  123.38
   6 -14   1   79.55    9.63
   6 -14   1   71.18    8.95
  -6  14  -1   71.15    9.52
  -6  14  -1   70.60    9.25
   6 -15   1  262.21   29.25
   6 -15   1  197.17   22.30
  -6  15  -1  199.40   22.54
  -6  15  -1  207.61   23.73
   7  14   1    0.31    3.12
   7  14   1   -2.17    4.85
  -7 -14  -1    0.88    2.81
  -7 -14  -1    3.08    2.58
   7  13   1  618.92   68.43
   7  13   1  647.39   71.93
  -7 -13  -1  563.33   62.20
  -7 -13  -1  572.49   63.25
   7  12   1  373.18   41.49
   7  12   1  311.60   35.32
  -7 -12  -1  291.33   32.44
  -7 -12  -1  311.12   34.64
   7  11   1  150.97   17.25
   7  11   1  146.02   17.63
  -7 -11  -1  146.36   16.68
  -7 -11  -1  154.53   17.59
   7  10   1  495.54   54.91
   7  10   1  559.27   62.47
  -7 -10  -1  529.78   58.64
  -7 -10  -1  493.17   54.57
   7   9   1  210.86   24.64
   7   9   1  209.37   23.59
  -7  -9  -1  228.55   25.69
  -7  -9  -1  205.61   23.29
   7   8   1  567.74   62.81
   7   8   1  562.66   62.77
  -7  -8  -1  569.77   63.01
  -7  -8  -1  535.88   59.35
   7   7   1   46.84    6.41
   7   7   1   44.10    7.80
  -7  -7  -1   45.89    6.07
  -7  -7  -1   54.77    7.22
   7   6   1  359.96   40.03
   7   6   1  403.01   45.28
  -7  -6  -1  406.40   45.18
  -7  -6  -1  528.42   58.50
   7   5   1   18.10    5.39
   7   5   1   31.93    5.08
  -7  -5  -1   21.76    4.27
  -7  -5  -1   23.22    4.41
   7   4   1  168.56   19.90
   7   4   1  222.76   25.29
  -7  -4  -1  195.81   22.10
  -7  -4  -1  212.22   24.00
   7   3   1 1451.38  159.88
   7   3   1 1654.07  182.46
  -7  -3  -1 2104.20  231.60
  -7  -3  -1 1472.40  162.12
   7   2   1 2639.40  290.65
   7   2   1 2564.49  282.14
  -7  -2  -1 2446.87  269.13
  -7  -2  -1 2884.80  317.36
   7   1   1   72.74   10.03
   7   1   1   70.64    9.08
  -7  -1  -1   84.91   10.34
  -7  -1  -1   87.48   10.81
   7   0   1    1.08    4.07
   7   0   1   -2.27    3.49
  -7   0  -1    4.58    4.10
  -7   0  -1    1.53    3.22
   7  -1   1   70.54    9.29
   7  -1   1  103.38   12.30
  -7   1  -1   81.31   10.10
  -7   1  -1  105.92   12.61
   7  -2   1 2455.35  270.21
   7  -2   1 2576.35  283.60
  -7   2  -1 2595.33  285.60
  -7   2  -1 2500.09  275.09
   7  -3   1 1669.32  183.98
   7  -3   1 1497.82  165.03
  -7   3  -1 1501.88  165.51
  -7   3  -1 1602.21  176.46
   7  -4   1  244.15   27.73
   7  -4   1  323.56   36.23
  -7   4  -1  208.96   23.66
  -7   4  -1  228.59   25.96
   7  -5   1   24.23    4.88
   7  -5   1   24.68    5.36
  -7   5  -1   27.73    5.52
  -7   5  -1   22.57    4.98
   7  -6   1  692.47   76.67
   7  -6   1  615.53   68.23
  -7   6  -1  635.19   70.43
  -7   6  -1  605.70   67.18
   7  -7   1   72.50    9.42
   7  -7   1   72.60    9.59
  -7   7  -1   77.04    9.97
  -7   7  -1   71.08    9.52
   7  -8   1  869.07   95.99
   7  -8   1  894.49   98.74
  -7   8  -1  835.85   92.36
  -7   8  -1  835.51   92.43
   7  -9   1  314.21   35.18
   7  -9   1  303.97   34.06
  -7   9  -1  317.09   35.62
  -7   9  -1  334.20   37.62
   7 -10   1  802.29   88.64
   7 -10   1  740.94   81.89
  -7  10  -1  746.03   82.50
  -7  10  -1  741.28   82.03
   7 -11   1  204.15   23.18
   7 -11   1  199.23   22.57
  -7  11  -1  208.93   23.86
  -7  11  -1  262.45   29.73
   7 -12   1  447.41   49.69
   7 -12   1  436.57   48.40
  -7  12  -1  448.77   49.83
  -7  12  -1  501.31   55.72
   7 -13   1  948.38  104.53
   7 -13   1  820.60   90.50
  -7  13  -1  928.38  102.53
  -7  13  -1  813.14   89.82
   7 -14   1   -1.53    2.85
   7 -14   1   -1.53    3.29
  -7  14  -1    4.81    4.30
  -7  14  -1   -2.03    4.81
   8  12   1  466.39   52.13
   8  12   1  510.80   56.54
  -8 -12  -1  496.90   54.98
  -8 -12  -1  463.68   51.25
   8  11   1  237.60   27.29
   8  11   1  236.35   26.51
  -8 -11  -1  216.55   24.30
  -8 -11  -1  212.93   23.90
   8  10   1    1.42    5.73
   8  10   1    8.58    3.36
  -8 -10  -1    8.37    3.19
  -8 -10  -1    7.29    3.53
   8   9   1 1853.37  204.39
   8   9   1 1860.49  204.79
  -8  -9  -1 1775.08  195.30
  -8  -9  -1 1696.44  186.73
   8   8   1  562.66   62.77
   8   8   1  517.24   57.35
  -8  -8  -1  537.23   59.45
  -8  -8  -1  711.79   78.60
   8   7   1  332.37   37.52
   8   7   1  388.77   43.32
  -8  -7  -1  335.02   37.25
  -8  -7  -1  321.02   35.79
   8   6   1  834.83   92.53
   8   6   1  965.33  106.57
  -8  -6  -1  937.87  103.48
  -8  -6  -1  913.81  100.84
   8   5   1  423.69   47.45
   8   5   1  512.15   56.88
  -8  -5  -1  470.46   52.20
  -8  -5  -1  463.00   51.32
   8   4   1   55.82    7.73
   8   4   1   61.55    9.05
  -8  -4  -1   73.45    9.25
  -8  -4  -1   60.54    7.66
   8   3   1  322.71   36.03
   8   3   1  476.90   53.45
  -8  -3  -1  405.04   44.88
  -8  -3  -1  419.96   46.67
   8   2   1  365.05   40.67
   8   2   1  395.21   44.50
  -8  -2  -1  296.82   33.22
  -8  -2  -1  370.13   41.15
   8   1   1   88.50   10.95
   8   1   1   75.55   10.20
  -8  -1  -1   84.33   10.34
  -8  -1  -1  103.18   12.27
  -8   0  -1    4.64    3.36
  -8   0  -1   12.34    4.17
  -8   1  -1   87.18   10.68
  -8   1  -1   79.82    9.73
   8  -2   1  388.10   43.25
   8  -2   1  374.88   41.93
  -8   2  -1  388.44   43.25
  -8   2  -1  385.72   42.94
   8  -3   1  450.80   50.13
   8  -3   1  449.11   50.06
  -8   3  -1  461.99   51.28
  -8   3  -1  400.30   44.57
  -8   4  -1   82.16   10.34
  -8   4  -1   67.48    8.74
   8  -5   1  598.92   66.43
   8  -5   1  627.39   69.59
  -8   5  -1  530.12   58.84
  -8   5  -1  519.27   57.79
   8  -6   1 1339.53  147.65
   8  -6   1 1492.05  164.46
  -8   6  -1 1496.46  164.93
  -8   6  -1 1194.12  131.72
   8  -7   1  588.75   65.25
   8  -7   1  559.94   62.06
  -8   7  -1  540.62   60.03
  -8   7  -1  528.08   58.77
   8  -8   1  933.13  103.01
   8  -8   1  923.98  101.99
  -8   8  -1  847.71   93.69
  -8   8  -1  868.05   95.89
   8  -9   1 2870.90  315.80
   8  -9   1 3555.58  390.81
  -8   9  -1 2475.01  272.38
  -8   9  -1 2719.39  299.16
   8 -10   1    7.15    4.51
   8 -10   1   15.80    4.14
  -8  10  -1    3.05    4.68
  -8  10  -1   12.81    4.78
   8 -11   1  318.37   35.49
   8 -11   1  379.62   42.23
  -8  11  -1  375.22   41.86
  -8  11  -1  388.44   43.45
   8 -12   1  650.10   71.82
   8 -12   1  545.03   60.30
  -8  12  -1  684.00   75.65
  -8  12  -1  750.09   82.84
  -8  13  -1   75.31    9.90
   9  11   1   -1.53    2.85
   9  11   1    2.98    4.98
  -9 -11  -1    2.95    3.39
  -9 -11  -1    3.32    2.41
   9  10   1  126.19   14.47
   9  10   1  150.09   18.03
  -9 -10  -1  143.04   16.30
  -9 -10  -1  107.51   12.30
  -9  -9  -1 1328.34  146.26
  -9  -9  -1 1148.70  126.53
   9   8   1   14.34    5.86
   9   8   1   15.15    3.93
  -9  -8  -1   11.05    3.19
  -9  -8  -1   19.69    4.30
   9   7   1  152.22   18.51
   9   7   1  125.95   14.61
  -9  -7  -1  154.43   17.66
  -9  -7  -1  132.53   15.18
   9   6   1  714.84   78.94
   9   6   1  699.25   77.59
  -9  -6  -1  734.16   81.08
  -9  -6  -1  707.05   78.03
   9   5   1 2024.88  222.79
   9   5   1 2089.96  230.25
  -9  -5  -1 2177.75  239.60
  -9  -5  -1 2021.83  222.42
   9   4   1  109.21   13.02
   9   4   1  120.97   14.85
  -9  -4  -1  125.07   14.51
  -9  -4  -1  126.09   14.71
   9   3   1 1616.11  178.19
   9   3   1 1366.98  150.63
  -9  -3  -1 1453.08  159.98
  -9  -3  -1 1693.39  186.46
   9   2   1   16.74    5.52
   9   2   1   18.51    4.47
  -9  -2  -1   13.90    4.24
  -9  -2  -1   20.44    4.00
   9   1   1 3521.68  387.42
   9   1   1 3630.15  398.94
  -9  -1  -1 3667.43  403.35
  -9  -1  -1 3497.96  384.71
   9   0   1    6.13    3.73
   9   0   1    5.83    4.44
  -9   0  -1   -0.61    3.53
  -9   0  -1    4.78    3.49
   9  -1   1 3221.37  354.20
   9  -1   1 2955.98  325.12
  -9   1  -1 3436.94  377.93
  -9   1  -1 3772.50  414.87
   9  -3   1 2160.46  237.81
   9  -3   1 1503.58  165.68
  -9   3  -1 1475.11  162.42
  -9   3  -1 1966.58  216.45
   9  -4   1  141.82   16.61
   9  -4   1  152.09   17.69
  -9   4  -1  175.37   20.13
  -9   4  -1  132.09   15.49
   9  -5   1 2769.21  304.72
   9  -5   1 2425.18  266.85
  -9   5  -1 2420.10  266.24
  -9   5  -1 2712.27  298.38
   9  -6   1 1000.24  110.40
   9  -6   1  881.95   97.41
  -9   6  -1  858.56   94.80
  -9   6  -1  812.80   89.82
   9  -7   1  196.93   22.44
   9  -7   1  196.86   22.47
  -9   7  -1  167.85   19.32
  -9   7  -1  164.32   19.05
   9  -8   1   19.35    4.41
   9  -8   1   25.79    5.36
  -9   8  -1   19.49    5.05
  -9   8  -1   21.59    5.76
   9  -9   1 1989.97  219.00
   9  -9   1 1816.43  199.91
  -9   9  -1 1706.95  188.02
  -9   9  -1 1895.40  208.72
   9 -10   1  198.66   22.40
   9 -10   1  224.42   25.29
  -9  10  -1  202.83   23.18
  -9  10  -1  301.50   33.79
   9 -11   1    9.12    3.90
   9 -11   1    6.64    3.36
  -9  11  -1    4.37    4.30
  -9  11  -1    5.46    4.41
  10   8   1  236.86   26.54
  10   8   1  225.57   25.79
 -10  -8  -1  209.67   23.46
 -10  -8  -1  249.33   27.93
  10   7   1   11.08    3.32
  10   7   1    6.91    5.83
 -10  -7  -1    9.08    2.85
 -10  -7  -1    4.68    3.49
  10   6   1  473.17   52.81
  10   6   1  415.89   46.13
 -10  -6  -1  488.76   54.23
 -10  -6  -1  387.08   42.88
  10   5   1   93.28   11.96
  10   5   1   87.21   10.71
 -10  -5  -1   84.91   10.10
 -10  -5  -1  109.72   12.95
  10   4   1  107.07   13.29
  10   4   1  103.92   12.51
 -10  -4  -1  103.41   12.13
 -10  -4  -1  108.46   12.64
  10   3   1  336.10   37.49
  10   3   1  332.98   37.42
 -10  -3  -1  334.75   37.28
 -10  -3  -1  359.29   39.86
  10   2   1 3072.24  338.03
  10   2   1 3177.65  349.46
 -10  -2  -1 2858.36  314.31
 -10  -2  -1 3183.41  350.13
  10   1   1  208.15   24.03
  10   1   1  178.73   20.37
 -10  -1  -1  185.24   21.05
 -10  -1  -1  192.62   21.83
  10   0   1   -3.76    3.90
  10   0   1   -1.69    4.85
 -10   0  -1    1.08    3.39
 -10   0  -1    0.51    3.93
  10  -1   1  192.59   21.90
  10  -1   1  227.60   25.79
 -10   1  -1  180.46   20.44
 -10   1  -1  175.78   20.17
  10  -2   1 3497.96  384.71
  10  -2   1 2911.23  320.24
 -10   2  -1 3160.70  347.42
 -10   2  -1 3623.37  398.60
  10  -3   1  363.35   40.54
  10  -3   1  303.09   33.96
 -10   3  -1  370.47   41.35
 -10   3  -1  320.98   35.79
  10  -4   1  131.31   15.46
  10  -4   1  113.58   13.49
 -10   4  -1  119.95   14.13
 -10   4  -1  139.58   16.30
  10  -5   1  110.77   13.32
  10  -5   1  107.35   12.85
 -10   5  -1   95.79   11.46
 -10   5  -1  110.90   13.25
  10  -6   1  554.18   61.45
  10  -6   1  540.28   59.89
 -10   6  -1  524.02   58.10
 -10   6  -1  538.25   59.72
  10  -7   1   13.56    4.44
  10  -7   1   10.03    4.34
 -10   7  -1    9.66    3.97
 -10   7  -1    8.74    4.41
  10  -8   1  305.39   34.06
  10  -8   1  288.92   32.27
 -10   8  -1  280.45   31.32
 -10   8  -1  290.95   32.67
  11   4   1  106.40   12.41
  11   4   1   82.33   10.41
 -11  -4  -1   80.67    9.69
 -11  -4  -1   70.60    8.54
  11   3   1  376.23   41.96
  11   3   1  376.23   41.76
 -11  -3  -1  365.73   40.50
 -11  -3  -1  290.75   32.37
  11   2   1  129.51   15.29
  11   2   1  128.22   14.95
 -11  -2  -1  123.78   14.34
 -11  -2  -1  142.53   16.24
  11   1   1   56.81    7.32
  11   1   1   53.62    7.76
 -11  -1  -1   53.25    7.05
 -11  -1  -1   53.28    7.08
  11   0   1    4.14    3.56
  11   0   1   -0.75    4.91
 -11   0  -1   10.74    3.69
 -11   0  -1    0.44    3.32
  11  -1   1   51.79    7.36
  11  -1   1   62.60    8.17
 -11   1  -1   50.57    6.78
 -11   1  -1   54.30    7.08
 -11   2  -1  144.26   16.47
 -11   2  -1  181.37   20.64
  11  -3   1  360.98   40.20
  11  -3   1  426.06   47.28
 -11   3  -1  444.70   49.35
 -11   3  -1  371.15   41.18
  11  -4   1   90.16   10.81
  11  -4   1  101.52   12.30
 -11   4  -1   99.48   11.96
 -11   4  -1   84.70   10.07
 -12   5   2   -0.68    4.98
 -12   5   2    5.97    4.37
  12  -5  -2    1.69    4.20
  12  -5  -2    0.54    3.73
 -12   4   2  679.93   75.11
 -12   4   2  641.29   71.04
  12  -4  -2  519.61   57.55
  12  -4  -2  516.90   57.18
 -12   3   2 1580.18  174.05
 -12   3   2 1409.35  155.17
  12  -3  -2 1409.69  155.27
  12  -3  -2 1422.91  156.70
 -12   2   2   77.96   10.00
 -12   2   2  105.04   12.78
  12  -2  -2   85.38   10.64
  12  -2  -2   84.53   10.44
 -12   1   2  490.12   54.37
 -12   1   2  510.46   56.57
  12  -1  -2  476.22   52.81
  12  -1  -2  493.85   54.84
 -12   0   2  351.15   39.15
 -12   0   2  345.39   38.50
  12   0  -2  441.31   48.94
  12   0  -2  372.84   41.62
 -12  -1   2  486.73   53.93
 -12  -1   2  521.98   57.86
  12   1  -2  503.68   55.96
  12   1  -2  451.14   50.06
 -12  -2   2   83.35   10.24
 -12  -2   2   77.48    9.80
  12   2  -2   88.53   11.12
  12   2  -2   82.43   10.13
 -12  -3   2 1224.28  134.80
 -12  -3   2 1334.78  147.04
  12   3  -2 1321.22  145.61
  12   3  -2 1237.50  136.29
 -12  -4   2  504.70   55.93
 -12  -4   2  422.33   46.77
  12   4  -2  482.32   53.62
  12   4  -2  435.55   48.27
 -12  -5   2    3.80    3.22
 -12  -5   2    3.25    3.93
  12   5  -2    2.91    3.69
  12   5  -2   -1.02    4.85
 -11   9   2   34.00    5.90
 -11   9   2   15.12    6.34
  11  -9  -2   24.81    4.98
  11  -9  -2   31.66    5.05
 -11   8   2  591.81   65.69
 -11   8   2  843.64   93.11
  11  -8  -2  699.59   77.25
  11  -8  -2  816.87   90.16
 -11   7   2  436.57   48.71
 -11   7   2  541.98   60.10
  11  -7  -2  438.94   48.74
  11  -7  -2  505.03   55.93
 -11   6   2  125.17   14.74
 -11   6   2  109.82   13.66
  11  -6  -2  107.11   12.81
  11  -6  -2  101.82   12.13
 -11   5   2   81.38   10.98
 -11   5   2   81.52   10.37
  11  -5  -2   79.38   10.10
  11  -5  -2   78.67    9.83
 -11   4   2 5551.99  610.45
 -11   4   2 4863.92  534.86
 -11   3   2   22.85    5.59
 -11   3   2   19.83    5.73
  11  -3  -2    7.93    4.71
  11  -3  -2    9.12    4.37
 -11   2   2   20.30    5.12
 -11   2   2   15.35    5.25
  11  -2  -2   24.71    5.49
  11  -2  -2   16.85    4.44
 -11   1   2  688.07   76.09
 -11   1   2  840.93   92.87
  11  -1  -2  924.31  101.99
  11  -1  -2  802.63   88.77
 -11   0   2 1138.87  125.55
 -11   0   2 1032.78  113.89
  11   0  -2 1038.54  114.53
  11   0  -2 1145.99  126.43
 -11  -1   2  860.93   95.08
 -11  -1   2  754.16   83.31
  11   1  -2  687.73   76.13
  11   1  -2  866.35   95.79
 -11  -2   2   17.56    5.25
 -11  -2   2    6.10    4.07
  11   2  -2   14.88    4.41
  11   2  -2   20.30    5.66
 -11  -3   2   15.56    4.58
 -11  -3   2   26.03    4.78
  11   3  -2    5.05    5.05
  11   3  -2    8.74    3.46
 -11  -4   2 3830.13  420.97
 -11  -4   2 4101.28  451.14
  11   4  -2 3477.62  382.33
  11   4  -2 3497.96  384.71
 -11  -5   2   58.40    7.52
 -11  -5   2   77.82    9.80
  11   5  -2   88.94   11.63
  11   5  -2   54.10    7.05
 -11  -6   2   89.99   10.98
 -11  -6   2   70.84    8.71
  11   6  -2   70.87    9.02
  11   6  -2   92.36   11.86
 -11  -7   2  281.70   31.39
 -11  -7   2  351.49   39.18
  11   7  -2  336.20   37.42
  11   7  -2  302.27   34.13
 -11  -8   2  481.31   53.32
 -11  -8   2  486.73   53.86
  11   8  -2  515.20   56.98
  11   8  -2  469.44   52.30
 -11  -9   2   15.83    3.39
 -11  -9   2   25.42    4.95
  11   9  -2   21.32    4.41
  11   9  -2   16.03    4.75
 -10  11   2  987.36  108.94
 -10  11   2  812.80   89.89
  10 -11  -2  863.98   95.24
  10 -11  -2  965.67  106.43
 -10  10   2  394.54   44.00
 -10  10   2  340.64   38.30
  10 -10  -2  457.58   50.74
  10 -10  -2  430.47   47.72
 -10   9   2  128.26   15.83
 -10   9   2  141.10   16.47
  10  -9  -2  160.70   18.34
  10  -9  -2  135.48   15.83
 -10   8   2   69.62    9.19
 -10   8   2   50.88    8.41
  10  -8  -2   68.84    8.68
  10  -8  -2   57.96    7.73
 -10   7   2  136.43   16.07
 -10   7   2  118.06   14.51
  10  -7  -2  157.51   18.24
  10  -7  -2  138.36   16.07
 -10   6   2  391.49   43.96
 -10   6   2  454.87   50.54
  10  -6  -2  426.40   47.35
  10  -6  -2  378.61   42.33
 -10   5   2  423.01   47.05
 -10   5   2  444.70   49.66
  10  -5  -2  410.47   45.62
  10  -5  -2  386.06   43.05
 -10   4   2   82.57   10.37
 -10   4   2   91.52   12.17
  10  -4  -2   72.57    9.73
  10  -4  -2   74.64    9.46
 -10   3   2 6195.99  681.29
 -10   3   2 5413.02  594.86
  10  -3  -2 5111.35  561.64
  10  -3  -2 5267.27  578.93
 -10   2   2    6.61    4.68
 -10   2   2   -3.53    4.61
  10  -2  -2    3.93    4.34
  10  -2  -2    3.76    4.37
 -10   1   2  679.59   75.21
 -10   1   2  671.12   74.20
  10  -1  -2  666.04   73.86
  10  -1  -2  661.63   73.18
 -10   0   2   75.31    9.97
 -10   0   2   75.79    9.56
  10   0  -2   66.60    9.25
  10   0  -2   66.67    8.81
 -10  -1   2  596.89   66.13
 -10  -1   2  624.01   69.15
  10   1  -2  582.31   64.74
  10   1  -2  521.30   57.82
 -10  -2   2    7.59    4.64
 -10  -2   2   -1.80    4.20
  10   2  -2    6.75    4.07
  10   2  -2    5.36    4.95
 -10  -3   2 4179.24  459.62
 -10  -3   2 3833.51  421.65
  10   3  -2 3653.87  401.99
  10   3  -2 3860.63  424.36
 -10  -4   2   51.35    6.91
 -10  -4   2   59.76    8.27
  10   4  -2   55.15    7.46
  10   4  -2   51.93    7.83
 -10  -5   2  173.75   19.83
 -10  -5   2  240.72   26.95
  10   5  -2  261.91   29.32
  10   5  -2  233.43   26.71
 -10  -6   2  220.45   24.88
 -10  -6   2  233.87   26.30
  10   6  -2  253.60   28.47
  10   6  -2  233.67   26.78
 -10  -7   2   80.97    9.93
 -10  -7   2   78.94    9.49
  10   7  -2   75.65   10.07
  10   7  -2   75.52    9.22
 -10  -8   2   55.42    7.19
 -10  -8   2   39.01    6.07
  10   8  -2   45.69    7.22
  10   8  -2   43.42    5.97
 -10  -9   2   96.19   11.22
 -10  -9   2   95.08   11.42
  10   9  -2  128.63   14.85
  10   9  -2   96.57   12.13
 -10 -10   2  274.89   30.67
 -10 -10   2  267.26   29.96
  10  10  -2  283.36   32.03
  10  10  -2  331.12   36.78
 -10 -11   2  648.07   71.59
 -10 -11   2  700.27   77.25
  10  11  -2  658.58   72.87
  10  11  -2  750.09   82.74
  -9  13   2  555.20   61.52
  -9  13   2  426.40   47.55
   9 -13  -2  510.80   56.50
   9 -13  -2  552.49   61.08
  -9  12   2   19.18    5.73
  -9  12   2   15.32    5.46
   9 -12  -2   19.22    3.90
   9 -12  -2   15.42    4.34
  -9  11   2 2429.59  267.40
  -9  11   2 2303.16  253.57
   9 -11  -2 2273.67  250.14
   9 -11  -2 2316.38  254.79
  -9  10   2 1010.41  111.68
  -9  10   2 1368.68  150.83
   9 -10  -2  939.23  103.62
   9 -10  -2  996.51  109.89
  -9   9   2  133.17   15.90
  -9   9   2  152.73   18.10
   9  -9  -2  149.04   17.29
   9  -9  -2  175.58   19.96
  -9   8   2   24.54    6.41
  -9   8   2   22.88    5.19
   9  -8  -2   20.17    4.54
   9  -8  -2   19.49    4.91
  -9   7   2  682.30   75.52
  -9   7   2  686.71   76.13
   9  -7  -2  710.78   78.60
   9  -7  -2  714.84   79.01
  -9   6   2   34.44    6.10
  -9   6   2   29.49    6.88
   9  -6  -2   29.22    5.32
   9  -6  -2   25.42    4.91
  -9   5   2   74.67    9.69
  -9   5   2   78.98   10.91
   9  -5  -2   69.65    8.88
   9  -5  -2   84.26   10.37
  -9   4   2 1264.28  139.51
  -9   4   2 1273.43  140.36
   9  -4  -2 1212.42  133.61
   9  -4  -2 1042.95  115.11
  -9   3   2 3316.96  364.71
  -9   3   2 3246.46  356.91
   9  -3  -2 3238.66  356.24
   9  -3  -2 2949.20  324.37
  -9   2   2   90.74   11.22
  -9   2   2   95.75   11.80
   9  -2  -2   82.70   10.24
   9  -2  -2   82.03   10.30
  -9   1   2  410.47   45.72
  -9   1   2  407.76   45.52
   9  -1  -2  372.51   41.62
   9  -1  -2  334.00   37.35
  -9   0   2  776.19   85.86
  -9   0   2  719.25   79.59
   9   0  -2  625.36   69.21
   9   0  -2  697.56   77.28
  -9  -1   2  340.98   38.03
  -9  -1   2  336.47   37.69
   9   1  -2  336.68   37.89
   9   1  -2  294.99   32.98
  -9  -2   2   71.65    8.98
  -9  -2   2   72.77    9.39
   9   2  -2   65.21    8.13
   9   2  -2   74.09    9.90
  -9  -3   2 2357.05  259.43
  -9  -3   2 2319.09  255.09
   9   3  -2 2110.30  232.21
   9   3  -2 2017.43  222.22
  -9  -4   2  717.56   79.25
  -9  -4   2  523.00   57.96
   9   4  -2  842.97   93.11
   9   4  -2  810.77   89.69
  -9  -5   2   49.83    6.61
  -9  -5   2   43.55    6.37
   9   5  -2   46.03    7.05
   9   5  -2   54.13    7.08
  -9  -6   2   17.32    4.44
  -9  -6   2   22.98    4.47
   9   6  -2   21.66    5.66
   9   6  -2   28.91    4.64
  -9  -7   2  422.33   47.01
  -9  -7   2  448.09   49.69
   9   7  -2  429.11   48.00
   9   7  -2  466.39   51.66
  -9  -8   2   19.39    4.71
  -9  -8   2   10.03    3.19
   9   8  -2   16.13    3.73
   9   8  -2   13.86    5.15
  -9  -9   2  107.65   12.85
  -9  -9   2  106.57   12.47
   9   9  -2  109.85   13.83
   9   9  -2  114.90   13.39
  -9 -10   2  866.35   95.65
  -9 -10   2  768.40   84.74
   9  10  -2  955.84  105.35
   9  10  -2  709.76   78.67
  -9 -11   2 1868.97  205.67
  -9 -11   2 1793.04  197.30
   9  11  -2 1873.71  206.15
   9  11  -2 1622.55  178.76
  -9 -12   2   17.86    4.14
  -9 -12   2   11.49    3.19
   9  12  -2   18.03    4.14
   9  12  -2   14.74    5.76
  -9 -13   2  385.39   42.78
  -9 -13   2  421.99   46.64
   9  13  -2  495.54   54.71
   9  13  -2  467.07   52.03
  -8  14   2  237.16   27.08
  -8  14   2  272.48   30.74
   8 -14  -2  254.11   28.34
   8 -14  -2  254.58   28.40
  -8  13   2   21.93    5.46
  -8  13   2   21.35    6.13
   8 -13  -2   23.29    4.47
   8 -13  -2   26.64    4.58
  -8  12   2    2.44    5.02
  -8  12   2   13.59    5.66
   8 -12  -2   16.03    4.14
   8 -12  -2    4.10    3.66
  -8  11   2   64.71    8.74
  -8  11   2   72.94    9.86
   8 -11  -2   64.54    8.44
   8 -11  -2   67.32    8.41
  -8  10   2 2161.14  237.91
  -8  10   2 2063.18  227.20
   8 -10  -2 2066.23  227.40
   8 -10  -2 2027.25  223.06
  -8   9   2  167.37   19.52
  -8   9   2  146.56   17.35
   8  -9  -2  145.41   16.85
   8  -9  -2  144.63   16.71
  -8   8   2  901.60   99.68
  -8   8   2  843.98   93.31
   8  -8  -2  866.35   95.62
   8  -8  -2  860.93   95.04
  -8   7   2 1015.49  112.26
  -8   7   2  901.27   99.58
   8  -7  -2 1038.88  114.56
   8  -7  -2  966.34  106.60
  -8   6   2  275.90   31.32
  -8   6   2  225.13   25.52
   8  -6  -2  262.65   29.45
   8  -6  -2  283.77   31.90
  -8   5   2  472.50   52.67
  -8   5   2  451.14   50.13
   8  -5  -2  460.29   51.08
   8  -5  -2  431.82   48.03
  -8   4   2 5453.69  599.94
  -8   4   2 7443.32  817.88
   8  -4  -2 5382.51  591.81
   8  -4  -2 7023.03  771.79
  -8   3   2  283.40   31.79
  -8   3   2  267.91   30.30
   8  -3  -2  241.30   27.18
   8  -3  -2  296.24   33.15
  -8   2   2   69.28    9.12
  -8   2   2   76.77    9.52
   8  -2  -2   73.18    9.08
   8  -2  -2   67.04    8.81
  -8   1   2 1700.85  187.30
  -8   1   2 2222.83  244.76
   8  -1  -2 1630.01  179.54
   8  -1  -2 1984.55  218.52
  -8   0   2  294.61   33.08
  -8   0   2  327.97   36.61
   8   0  -2  282.58   31.62
   8   0  -2  290.34   32.71
  -8  -1   2 1538.15  169.34
  -8  -1   2 1362.58  150.19
   8   1  -2 1399.52  154.15
   8   1  -2 1276.14  140.80
  -8  -2   2   44.67    6.07
  -8  -2   2   54.74    7.52
   8   2  -2   51.38    7.42
   8   2  -2   49.11    6.88
  -8  -3   2  167.47   18.98
  -8  -3   2  148.70   17.18
   8   3  -2  148.73   17.25
   8   3  -2  198.05   22.37
  -8  -4   2 4585.98  504.02
  -8  -4   2 3701.32  406.74
   8   4  -2 3857.24  424.36
   8   4  -2 5002.89  550.11
  -8  -5   2  263.16   29.56
  -8  -5   2  322.75   36.00
   8   5  -2  259.30   29.35
   8   5  -2  299.19   33.32
  -8  -6   2  170.97   19.52
  -8  -6   2  178.83   20.44
   8   6  -2  175.41   19.96
   8   6  -2  175.14   20.37
  -8  -7   2  707.05   78.20
  -8  -7   2  686.37   75.82
   8   7  -2  666.37   73.59
   8   7  -2  665.70   73.86
  -8  -8   2  569.43   62.94
  -8  -8   2  682.64   75.48
   8   8  -2  615.87   68.06
   8   8  -2  683.66   75.86
  -8  -9   2   98.94   11.59
  -8  -9   2  114.19   13.46
   8   9  -2   98.26   11.52
   8   9  -2  111.28   13.63
  -8 -10   2 1466.63  161.54
  -8 -10   2 1468.67  161.71
   8  10  -2 1624.92  178.83
   8  10  -2 1401.55  154.63
  -8 -11   2   63.59    7.86
  -8 -11   2   59.42    7.83
   8  11  -2   85.75   10.37
   8  11  -2   53.08    8.17
  -8 -12   2    0.14    3.12
  -8 -12   2    2.54    3.59
   8  12  -2    5.19    4.88
   8  12  -2    3.90    3.36
  -8 -13   2   32.20    5.02
  -8 -13   2   19.69    4.27
   8  13  -2   17.56    4.51
   8  13  -2   19.73    5.90
  -8 -14   2  216.52   24.20
  -8 -14   2  254.11   28.44
   8  14  -2  261.30   29.62
   8  14  -2  225.71   25.25
  -7  15   2  183.74   21.35
  -7  15   2  197.74   22.74
   7 -15  -2  175.64   19.76
   7 -15  -2  169.20   19.15
  -7  14   2  196.86   22.51
  -7  14   2  222.99   25.66
   7 -14  -2  224.93   25.25
   7 -14  -2  205.30   23.15
  -7  13   2   15.25    6.17
  -7  13   2   10.03    4.88
   7 -13  -2    6.41    3.05
   7 -13  -2    6.51    3.90
  -7  12   2   29.35    5.80
  -7  12   2   38.13    7.36
   7 -12  -2   32.10    5.19
   7 -12  -2   29.12    5.08
  -7  11   2 1142.94  126.12
  -7  11   2 1391.05  153.41
   7 -11  -2 1274.79  140.39
   7 -11  -2 1230.72  135.58
  -7  10   2  899.57   99.48
  -7  10   2  897.20   99.21
   7 -10  -2  767.04   84.67
   7 -10  -2  753.82   83.21
  -7   9   2  410.47   45.96
  -7   9   2  404.37   45.22
   7  -9  -2  382.67   42.50
   7  -9  -2  426.40   47.42
  -7   8   2  368.10   41.15
  -7   8   2  409.45   45.76
   7  -8  -2  369.12   41.08
   7  -8  -2  354.20   39.45
  -7   7   2   29.12    6.17
  -7   7   2   30.27    6.03
   7  -7  -2   22.57    4.41
   7  -7  -2   26.27    4.54
   7  -6  -2  300.28   33.52
   7  -6  -2  229.81   25.79
  -7   5   2  676.54   74.98
  -7   5   2  551.47   61.15
   7  -5  -2  636.21   70.40
   7  -5  -2  615.87   68.09
  -7   4   2 1046.00  115.38
  -7   4   2  975.83  107.85
   7  -4  -2 1345.29  148.26
   7  -4  -2 1102.26  121.58
   7  -3  -2 8263.58  908.04
   7  -3  -2 5809.59  638.92
  -7   2   2   15.83    4.95
  -7   2   2   16.74    4.00
   7  -2  -2   14.30    4.20
   7  -2  -2   16.74    4.81
  -7   1   2  941.26  103.89
  -7   1   2 1102.60  121.58
   7  -1  -2  841.61   92.97
   7  -1  -2  931.43  102.80
  -7   0   2  437.92   48.71
  -7   0   2  534.86   59.21
   7   0  -2  472.50   52.40
   7   0  -2  384.37   42.84
  -7  -1   2  755.86   83.45
  -7  -1   2  548.08   60.67
   7   1  -2  518.25   57.49
   7   1  -2  729.08   80.53
  -7  -2   2   12.98    4.00
  -7  -2   2    7.49    3.29
   7   2  -2   19.18    4.51
   7   2  -2   30.67    4.95
  -7  -3   2 4067.39  447.07
  -7  -3   2 5030.01  553.17
   7   3  -2 5274.05  579.94
   7   3  -2 4186.02  460.29
  -7  -4   2  907.37  100.16
  -7  -4   2  805.00   88.94
   7   4  -2  895.50   98.77
   7   4  -2  772.13   85.38
  -7  -5   2  503.00   55.82
  -7  -5   2  488.43   54.16
  -7  -6   2  187.03   21.32
  -7  -6   2  177.10   20.07
   7   6  -2  179.00   20.64
   7   6  -2  194.46   21.90
  -7  -7   2   18.40    4.75
  -7  -7   2   17.93    3.66
   7   7  -2   14.68    4.47
   7   7  -2   16.27    3.56
  -7  -8   2  263.63   29.45
  -7  -8   2  281.12   31.59
   7   8  -2  264.21   30.03
   7   8  -2  304.88   33.96
  -7  -9   2  298.17   33.39
  -7  -9   2  306.99   34.23
   7   9  -2  309.05   34.47
   7   9  -2  282.04   31.96
  -7 -10   2  655.19   72.43
  -7 -10   2  628.75   69.55
   7  10  -2  598.92   66.54
   7  10  -2  702.30   77.59
  -7 -11   2  986.68  108.73
  -7 -11   2 1012.78  111.72
   7  11  -2 1035.49  114.12
   7  11  -2 1038.54  114.77
  -7 -12   2   26.64    5.08
  -7 -12   2   27.15    4.37
   7  12  -2   58.94    7.59
   7  12  -2   35.01    6.91
  -7 -13   2   11.63    3.93
  -7 -13   2    5.86    2.78
   7  13  -2   11.29    3.93
   7  13  -2    8.54    5.93
  -7 -14   2  184.35   20.88
  -7 -14   2  200.83   22.47
   7  14  -2  211.64   24.47
   7  14  -2  202.76   22.91
  -7 -15   2  147.34   16.61
  -7 -15   2  153.82   17.46
   7  15  -2  186.73   21.69
   7  15  -2  158.22   18.13
  -6  16   2   54.94    8.10
  -6  16   2   79.52   10.74
   6 -16  -2   80.13    9.52
   6 -16  -2   78.77    9.46
  -6  15   2 1154.12  127.34
  -6  15   2 1418.16  156.29
   6 -15  -2 1531.71  168.53
   6 -15  -2 1541.88  169.68
  -6  14   2    8.81    5.39
  -6  14   2    6.95    5.86
   6 -14  -2    0.41    4.14
   6 -14  -2    7.29    3.12
  -6  13   2  942.96  104.16
  -6  13   2  890.76   98.43
   6 -13  -2 1012.78  111.68
   6 -13  -2  966.34  106.50
  -6  12   2   66.54    8.78
  -6  12   2   42.20    7.29
   6 -12  -2   44.23    5.93
   6 -12  -2   51.45    7.15
  -6  11   2 3224.42  354.54
  -6  11   2 3745.39  412.16
   6 -11  -2 3344.07  367.76
   6 -11  -2 3569.13  392.50
  -6  10   2  317.80   35.83
  -6  10   2  296.75   33.62
   6 -10  -2  313.02   34.98
   6 -10  -2  311.93   34.78
  -6   9   2  374.20   41.86
  -6   9   2  346.07   38.91
   6  -9  -2  333.73   37.18
   6  -9  -2  322.04   35.86
  -6   8   2   70.87    9.52
  -6   8   2   71.25    9.15
   6  -8  -2   72.23    8.78
   6  -8  -2   69.28    8.61
  -6   7   2  698.57   77.28
  -6   7   2  771.79   85.35
   6  -7  -2  725.01   80.06
   6  -7  -2  734.16   81.08
  -6   6   2   18.64    5.12
  -6   6   2   11.42    3.86
   6  -6  -2   13.86    3.83
   6  -6  -2   12.00    4.17
  -6   5   2   49.01    6.81
  -6   5   2   62.67    8.81
   6  -5  -2   68.60    8.68
   6  -5  -2   51.86    6.81
  -6   4   2 1734.40  191.03
  -6   4   2 1845.92  203.34
   6  -4  -2 1999.12  220.01
   6  -4  -2 1690.00  186.02
  -6   3   2 4840.19  532.15
  -6   3   2 3948.76  434.19
   6  -3  -2 4104.67  451.48
   6  -3  -2 4630.05  509.10
  -6   2   2   30.06    4.95
  -6   2   2   24.30    4.68
   6  -2  -2   25.29    4.54
   6  -2  -2   28.68    4.68
  -6   1   2   61.15    7.73
  -6   1   2   82.36   10.03
   6  -1  -2   66.87    8.10
   6  -1  -2   61.38    7.73
  -6  -1   2   39.96    5.63
  -6  -1   2   44.40    6.27
   6   1  -2   53.38    6.81
   6   1  -2   41.96    5.69
  -6  -2   2   17.90    4.24
  -6  -2   2   18.57    4.00
   6   2  -2   18.78    3.90
   6   2  -2   20.68    3.76
  -6  -3   2 3911.47  430.13
  -6  -3   2 4606.32  506.39
   6   3  -2 4179.24  459.62
   6   3  -2 3552.19  390.47
  -6  -4   2 1365.63  150.43
  -6  -4   2 1610.69  177.41
   6   4  -2 1528.66  168.25
   6   4  -2 1389.69  153.17
  -6  -5   2   45.05    6.30
  -6  -5   2   51.72    7.15
   6   5  -2   46.71    6.88
   6   5  -2   42.98    5.80
  -6  -6   2    7.63    3.46
  -6  -6   2    7.93    4.51
   6   6  -2   15.80    3.59
   6   6  -2    9.29    4.14
  -6  -7   2  535.54   59.38
  -6  -7   2  629.77   69.62
   6   7  -2  493.51   54.91
   6   7  -2  476.90   52.81
  -6  -8   2   56.03    7.63
  -6  -8   2   62.60    7.97
   6   8  -2   67.79    8.44
   6   8  -2   45.49    6.81
  -6  -9   2  266.24   30.00
  -6  -9   2  254.62   28.51
   6   9  -2  303.26   33.79
   6   9  -2  206.59   23.76
  -6 -10   2  276.55   31.05
  -6 -10   2  272.45   30.51
   6  10  -2  276.62   31.42
   6  10  -2  290.38   32.40
  -6 -11   2 3184.43  350.13
  -6 -11   2 2739.39  301.26
   6  11  -2 2865.14  315.09
   6  11  -2 3119.35  343.36
  -6 -12   2   44.33    5.93
  -6 -12   2   41.11    5.97
   6  12  -2   49.05    8.03
   6  12  -2   38.84    5.86
  -6 -13   2  837.88   92.43
  -6 -13   2  999.56  110.19
   6  13  -2 1015.15  112.26
   6  13  -2  933.80  102.94
  -6 -14   2    3.15    3.02
  -6 -14   2   12.03    4.00
   6  14  -2    1.69    5.46
   6  14  -2    1.42    3.66
  -6 -15   2 1559.51  171.64
  -6 -15   2 1601.87  176.29
   6  15  -2 1717.46  189.27
   6  15  -2 1706.27  187.78
  -6 -16   2   87.21   10.17
  -6 -16   2   92.23   10.74
   6  16  -2   89.35   11.32
   6  16  -2   74.06    9.08
  -5  17   2   55.96    8.68
  -5  17   2   60.91    9.69
   5 -17  -2   60.54    7.42
   5 -17  -2   61.25    7.86
  -5  16   2  125.24   15.63
  -5  16   2  110.63   13.39
   5 -16  -2  106.63   12.58
   5 -16  -2  116.43   13.35
  -5  15   2   43.25    7.46
  -5  15   2   50.23    8.58
   5 -15  -2   49.62    6.51
   5 -15  -2   48.94    6.91
  -5  14   2  873.47   96.80
  -5  14   2  849.41   93.92
   5 -14  -2  803.99   88.74
   5 -14  -2  740.26   81.69
  -5  13   2    0.88    4.68
  -5  13   2   11.32    6.17
   5 -13  -2    1.63    3.12
   5 -13  -2    4.91    4.10
  -5  12   2   -0.64    4.44
  -5  12   2    7.59    6.61
   5 -12  -2    7.63    4.14
   5 -12  -2    4.27    3.12
  -5  11   2  329.46   37.35
  -5  11   2  363.01   40.64
   5 -11  -2  310.88   34.61
   5 -11  -2  338.88   37.79
  -5  10   2 4697.84  516.90
  -5  10   2 4162.30  457.92
   5 -10  -2 3938.59  432.84
   5 -10  -2 4257.20  467.75
  -5   9   2  158.12   18.71
  -5   9   2  169.64   19.49
   5  -9  -2  163.85   18.61
   5  -9  -2  156.43   17.76
  -5   8   2  766.36   84.81
  -5   8   2  698.57   77.21
   5  -8  -2  716.88   79.18
   5  -8  -2  656.21   72.50
  -5   7   2 1803.89  198.66
  -5   7   2 1805.24  198.86
   5  -7  -2 1782.53  196.15
   5  -7  -2 1913.37  210.56
  -5   6   2  459.62   51.08
  -5   6   2  416.57   46.40
   5  -6  -2  428.43   47.52
   5  -6  -2  384.71   42.71
  -5   5   2 1069.72  117.89
  -5   5   2 1106.67  121.99
   5  -5  -2 1035.83  114.16
   5  -5  -2  969.73  106.84
  -5   4   2 6365.47  699.59
  -5   4   2 6192.60  680.61
   5  -4  -2 6019.74  661.63
   5  -4  -2 6107.86  671.46
  -5   3   2 1646.95  181.30
  -5   3   2 1337.49  147.31
   5  -3  -2 1572.05  173.03
   5  -3  -2 1500.87  165.24
  -5   2   2  181.13   20.44
  -5   2   2  272.85   30.37
   5  -2  -2  206.42   23.08
   5  -2  -2  237.60   26.54
  -5   1   2 1971.33  216.93
  -5   1   2 1423.93  156.70
   5  -1  -2 1643.90  180.86
   5  -1  -2 1252.08  137.85
  -5   0   2   13.39    3.19
  -5   0   2    9.66    2.75
   5   0  -2   13.42    2.98
   5   0  -2   12.17    2.91
  -5  -1   2 1344.95  148.09
  -5  -1   2 1598.82  176.05
   5   1  -2 1363.59  150.15
   5   1  -2 1593.06  175.30
  -5  -2   2  210.39   23.62
  -5  -2   2  246.75   27.62
   5   2  -2  234.76   26.17
   5   2  -2  206.22   23.22
  -5  -3   2 1521.20  167.47
  -5  -3   2 1822.53  200.59
   5   3  -2 1409.35  155.24
   5   3  -2 1630.68  179.41
  -5  -4   2 5301.17  582.65
  -5  -4   2 4999.50  549.44
   5   4  -2 4935.10  542.32
   5   4  -2 4741.90  521.30
  -5  -5   2  835.51   92.23
  -5  -5   2  768.74   84.81
   5   5  -2  734.84   81.04
   5   5  -2  806.36   89.18
  -5  -6   2  338.95   37.69
  -5  -6   2  330.27   36.84
   5   6  -2  300.21   33.76
   5   6  -2  278.38   31.01
  -5  -7   2 1450.36  159.75
  -5  -7   2 1440.53  158.66
   5   7  -2 1492.05  164.25
   5   7  -2 1216.49  134.22
  -5  -8   2  651.80   72.06
  -5  -8   2  534.52   59.25
   5   8  -2  570.45   63.42
   5   8  -2  590.45   65.28
  -5  -9   2  153.00   17.56
  -5  -9   2  138.70   16.03
   5   9  -2  128.67   15.35
   5   9  -2  127.82   14.74
  -5 -10   2 4430.07  487.07
  -5 -10   2 3809.79  418.94
   5  10  -2 3691.16  406.06
   5  10  -2 3874.19  425.72
  -5 -11   2  291.80   32.54
  -5 -11   2  288.85   32.34
   5  11  -2  312.51   35.39
   5  11  -2  369.79   41.11
  -5 -12   2    5.15    4.03
  -5 -12   2    0.54    2.78
   5  12  -2    5.46    5.19
   5  12  -2    5.39    3.59
  -5 -13   2    0.17    3.29
  -5 -13   2   -2.51    3.08
   5  13  -2    0.47    3.66
   5  13  -2    6.71    5.05
  -5 -14   2  853.47   94.16
  -5 -14   2  813.14   89.65
   5  14  -2 1215.13  133.85
   5  14  -2  897.20   99.28
  -5 -15   2   60.54    7.63
  -5 -15   2   56.40    7.29
   5  15  -2   55.52    8.81
   5  15  -2   59.28    8.13
  -5 -16   2  122.26   14.07
  -5 -16   2  107.62   12.54
   5  16  -2  126.97   15.35
   5  16  -2  115.79   13.59
  -5 -17   2   53.22    6.68
  -5 -17   2   52.16    6.68
   5  17  -2   59.25    7.69
   5  17  -2   44.27    7.49
  -4  17   2  131.89   16.74
  -4  17   2  101.35   12.47
   4 -17  -2  141.48   16.07
   4 -17  -2  109.48   12.81
  -4  16   2   12.20    6.75
  -4  16   2   16.81    5.76
   4 -16  -2   15.29    3.49
   4 -16  -2   18.54    4.44
  -4  15   2  357.93   40.54
  -4  15   2  302.21   34.06
   4 -15  -2  376.91   41.86
   4 -15  -2  352.51   39.11
  -4  14   2  100.60   12.68
  -4  14   2  122.26   15.80
   4 -14  -2  106.16   12.71
   4 -14  -2   91.69   10.74
  -4  13   2    2.64    4.78
  -4  13   2    9.32    6.75
   4 -13  -2   -1.12    4.00
   4 -13  -2    1.66    2.47
  -4  12   2  104.23   13.76
  -4  12   2  100.33   12.68
   4 -12  -2   95.11   11.46
   4 -12  -2   80.26    9.56
  -4  11   2  914.82  101.07
  -4  11   2 1104.64  122.12
   4 -11  -2  952.79  105.04
   4 -11  -2 1047.01  115.41
  -4  10   2 1073.79  118.43
  -4  10   2 1306.65  144.29
   4 -10  -2 1189.03  130.94
   4 -10  -2 1100.57  121.24
  -4   9   2  304.24   34.44
  -4   9   2  270.89   30.44
   4  -9  -2  290.58   32.37
   4  -9  -2  255.91   28.54
  -4   8   2 1351.39  149.10
  -4   8   2 1069.05  117.95
   4  -8  -2 1087.35  119.82
   4  -8  -2  989.73  109.04
  -4   7   2   74.70    9.35
  -4   7   2   59.69    8.20
   4  -7  -2   47.83    6.17
   4  -7  -2   62.03    7.66
  -4   6   2  131.07   15.22
  -4   6   2  114.16   13.22
   4  -6  -2  122.46   14.00
   4  -6  -2  119.28   13.69
  -4   5   2  951.43  104.84
  -4   5   2 1046.67  115.41
   4  -5  -2  951.43  104.80
   4  -5  -2  994.14  109.51
  -4   4   2 5880.77  646.38
  -4   4   2 5968.89  656.21
   4  -4  -2 5050.34  555.20
   4  -4  -2 5884.16  646.72
  -4   3   2 7446.71  818.56
  -4   3   2 7023.03  771.79
  -4   2   2   63.21    7.63
  -4   2   2   54.54    6.58
   4  -2  -2   58.81    6.91
   4  -2  -2   68.13    7.93
   4  -1  -2  358.27   39.59
   4  -1  -2  264.11   29.29
  -4   0   2 1711.35  188.29
  -4   0   2 1499.17  164.97
   4   0  -2 1549.34  170.42
   4   0  -2 1651.36  181.64
  -4  -1   2  539.61   59.59
  -4  -1   2  413.18   45.72
   4   1  -2  460.29   50.88
   4   1  -2  480.29   52.98
  -4  -2   2   81.62    9.56
  -4  -2   2   68.57    8.10
   4   2  -2   64.30    7.59
   4   2  -2   65.21    7.80
  -4  -3   2 5304.55  582.99
   4   3  -2 5965.51  655.53
  -4  -4   2 4708.00  517.58
  -4  -4   2 4396.17  483.34
   4   4  -2 4338.55  476.90
   4   4  -2 4158.91  457.24
  -4  -5   2  722.98   79.82
  -4  -5   2  768.40   84.77
   4   5  -2  794.16   87.52
   4   5  -2  644.00   71.28
  -4  -6   2   89.62   10.54
  -4  -6   2  101.85   12.00
   4   6  -2  103.04   12.37
   4   6  -2   87.55   10.27
  -4  -7   2   49.66    6.47
  -4  -7   2   50.10    6.71
   4   7  -2   52.30    6.75
   4   7  -2   56.57    8.27
  -4  -8   2  923.30  101.85
  -4  -8   2  868.39   95.79
   4   8  -2  978.21  107.82
   4   8  -2  878.90   97.18
  -4  -9   2  226.28   25.39
  -4  -9   2  260.04   29.22
  -4 -10   2 1188.36  130.97
  -4 -10   2  986.00  108.70
   4  10  -2 1072.10  118.50
   4  10  -2 1098.53  121.07
  -4 -11   2  926.69  102.26
  -4 -11   2  807.38   89.01
   4  11  -2 1046.34  115.34
   4  11  -2  922.28  102.09
  -4 -12   2  112.57   13.25
  -4 -12   2   89.35   10.51
   4  12  -2   99.35   12.10
   4  12  -2   99.68   12.74
  -4 -13   2    4.68    3.42
  -4 -13   2    1.59    3.08
   4  13  -2   11.56    4.30
   4  13  -2    2.51    4.68
  -4 -14   2  101.82   11.80
  -4 -14   2  103.38   12.24
   4  14  -2  124.63   14.95
   4  14  -2  101.18   12.64
  -4 -15   2  366.40   40.71
  -4 -15   2  328.61   36.57
   4  15  -2  368.78   41.01
   4  15  -2  352.17   39.72
  -4 -16   2   16.13    3.69
  -4 -16   2   11.80    3.97
   4  16  -2   23.86    5.02
   4  16  -2   17.93    6.13
  -4 -17   2   99.41   11.63
  -4 -17   2  135.00   15.35
   4  17  -2  128.87   14.91
   4  17  -2  119.95   14.71
  -3  18   2   21.52    7.15
  -3  17   2 1289.70  142.19
  -3  17   2 1342.24  148.26
   3 -17  -2 1491.38  164.15
   3 -17  -2 1275.80  140.43
  -3  16   2   23.69    7.49
  -3  16   2   30.71    7.12
   3 -16  -2   32.71    4.85
   3 -16  -2   24.27    4.98
  -3  15   2 1811.34  199.57
  -3  15   2 2005.22  221.10
   3 -15  -2 2122.16  233.43
   3 -15  -2 2032.68  223.64
  -3  14   2  113.72   13.66
  -3  14   2  128.16   16.20
   3 -14  -2  135.34   15.39
   3 -14  -2  149.95   17.29
  -3  13   2  862.29   95.41
  -3  13   2 1064.64  117.78
   3 -13  -2  979.56  107.96
   3 -13  -2 1098.20  121.04
  -3  12   2    0.41    4.64
  -3  12   2   15.69    6.58
   3 -12  -2    2.41    2.61
   3 -12  -2   11.05    3.90
  -3  11   2 3031.22  333.49
  -3  11   2 4023.33  442.67
   3 -11  -2 3061.05  336.54
   3 -11  -2 3589.47  394.88
  -3  10   2    0.58    4.64
  -3  10   2    5.93    5.15
   3 -10  -2    7.86    2.85
   3 -10  -2    6.78    2.75
  -3   9   2  205.10   23.42
  -3   9   2  225.77   25.96
   3  -9  -2  198.22   22.24
   3  -9  -2  208.59   23.35
  -3   8   2  194.05   22.03
  -3   8   2  262.96   29.69
   3  -8  -2  210.59   23.59
   3  -8  -2  204.35   22.88
   3  -7  -2  610.11   67.32
   3  -7  -2  699.93   77.18
  -3   6   2  128.02   14.54
  -3   6   2  147.24   16.95
   3  -6  -2  142.70   16.03
   3  -6  -2  149.82   16.81
  -3   5   2   11.93    2.64
  -3   5   2   11.63    3.59
   3  -5  -2   11.42    2.47
   3  -5  -2   13.29    2.54
  -3   4   2 1807.62  198.86
  -3   4   2 1475.11  162.29
   3  -4  -2 2033.02  223.54
   3  -4  -2 1733.72  190.66
  -3   2   2    6.68    1.69
  -3   2   2   12.34    2.07
   3  -2  -2   12.78    2.03
   3  -2  -2    9.59    1.80
  -3   1   2    7.32    1.53
  -3   1   2    8.00    1.66
   3  -1  -2   14.00    2.03
   3  -1  -2   10.41    1.76
  -3   0   2  241.26   26.71
  -3   0   2  203.61   22.61
   3   0  -2  196.49   21.76
   3   0  -2  206.83   22.95
   3   1  -2   55.66    6.44
   3   1  -2   61.82    7.12
  -3  -2   2   12.85    2.47
  -3  -2   2   12.61    2.68
   3   2  -2   15.05    2.47
   3   2  -2   13.76    2.44
  -3  -4   2 1213.78  133.65
  -3  -4   2 1443.25  158.87
   3   4  -2 1365.63  150.22
   3   4  -2 1173.44  129.24
  -3  -5   2    8.10    2.81
  -3  -5   2    7.39    2.64
   3   5  -2    5.97    2.30
   3   5  -2   10.44    3.05
  -3  -6   2  134.80   15.49
  -3  -6   2  141.95   16.20
   3   6  -2  151.61   17.15
   3   6  -2  123.55   14.37
  -3  -7   2  557.23   61.65
  -3  -7   2  568.42   62.84
   3   7  -2  662.98   73.15
   3   7  -2  609.43   67.55
  -3  -8   2  229.20   25.76
  -3  -8   2  187.91   21.22
   3   8  -2  191.78   21.62
   3   8  -2  164.97   19.25
  -3  -9   2  189.54   21.56
  -3  -9   2  186.96   21.05
   3   9  -2  209.81   23.62
   3   9  -2  198.08   22.91
  -3 -10   2    4.71    3.46
  -3 -10   2    2.24    2.64
   3  10  -2    3.22    3.63
   3  10  -2    8.24    3.56
  -3 -11   2 3087.83  339.63
  -3 -11   2 2899.03  318.92
   3  11  -2 3350.51  368.78
   3  11  -2 3979.26  437.58
  -3 -12   2    1.63    3.63
  -3 -12   2    3.15    2.91
   3  12  -2   -1.02    3.80
   3  12  -2   13.02    5.05
   3  13  -2  916.52  101.52
   3  13  -2 1201.91  132.43
   3  14  -2  151.48   17.49
   3  14  -2  128.97   15.66
  -3 -15   2 2051.66  225.74
  -3 -15   2 1889.30  207.88
   3  15  -2 1780.50  196.35
   3  15  -2 2569.91  282.72
  -3 -16   2   35.56    5.08
  -3 -16   2   28.88    4.85
   3  16  -2   32.91    6.03
   3  16  -2   28.34    6.91
  -3 -17   2 1506.29  165.75
  -3 -17   2 1337.15  147.21
   3  17  -2 1299.19  143.51
   3  17  -2 1603.57  176.52
  -3 -18   2   66.33    8.03
   3  18  -2   51.96    7.12
  -2  18   2  924.31  101.99
  -2  18   2 1026.00  113.45
   2 -18  -2  904.66   99.65
   2 -18  -2  973.12  107.11
  -2  17   2  300.61   33.93
  -2  17   2  323.70   37.18
   2 -17  -2  332.71   36.95
   2 -17  -2  308.51   34.34
  -2  16   2   89.96   11.59
  -2  16   2  110.06   15.29
   2 -16  -2  111.75   13.15
   2 -16  -2  102.13   11.90
   2 -15  -2  320.14   35.59
   2 -15  -2  353.52   39.28
  -2  14   2 1187.00  131.04
  -2  14   2 1316.14  145.44
   2 -14  -2 1350.71  148.73
   2 -14  -2 1305.63  143.75
  -2  13   2   86.43   11.49
  -2  13   2   90.57   12.27
   2 -13  -2   99.72   11.63
   2 -13  -2   71.48    8.64
  -2  12   2   29.22    5.76
  -2  12   2   28.71    6.71
   2 -12  -2   28.06    4.47
   2 -12  -2   29.62    4.27
  -2  11   2 1341.22  147.85
  -2  11   2 1453.08  160.32
   2 -11  -2 1397.83  153.82
   2 -11  -2 1421.89  156.49
  -2  10   2 3819.96  420.30
  -2  10   2 5772.30  634.51
   2 -10  -2 4901.20  538.93
  -2   9   2   93.35   12.13
  -2   9   2   68.60    9.05
   2  -9  -2   78.64    9.29
   2  -9  -2   80.81    9.46
   2  -8  -2  152.59   17.15
   2  -8  -2  145.71   16.37
   2  -7  -2  953.13  104.94
   2  -7  -2  969.39  106.74
   2  -6  -2  357.93   39.56
   2  -6  -2  427.41   47.15
   2  -5  -2  499.61   55.05
   2  -5  -2  439.62   48.50
   2  -4  -2 2653.63  291.70
  -2   3   2 2619.74  288.01
   2  -3  -2 3104.77  341.32
  -2   2   2  389.45   42.91
  -2   2   2  377.25   41.52
   2  -2  -2  425.04   46.84
   2  -2  -2  349.12   38.44
  -2   1   2 1272.75  140.05
  -2   0   2  752.81   82.84
  -2   0   2  600.96   66.13
   2   0  -2  737.55   81.14
   2   0  -2  545.71   60.06
  -2  -1   2 1864.22  205.00
  -2  -1   2 1418.16  155.98
   2   1  -2 1718.47  188.93
   2   1  -2 1321.56  145.38
  -2  -2   2  255.19   28.30
  -2  -2   2  353.86   39.11
   2   2  -2  281.57   31.18
   2   2  -2  387.08   42.71
  -2  -3   2 2466.19  271.16
  -2  -3   2 3308.82  363.69
   2   3  -2 2206.22  242.59
  -2  -4   2 2953.26  324.71
  -2  -4   2 2576.69  283.33
   2   4  -2 2550.93  280.55
   2   4  -2 3018.34  331.80
  -2  -5   2  320.37   35.59
  -2  -5   2  404.03   44.74
   2   5  -2  340.64   37.89
   2   5  -2  392.16   43.39
  -2  -6   2  351.49   38.98
  -2  -6   2  310.10   34.47
   2   6  -2  354.20   39.25
   2   6  -2  314.27   35.08
  -2  -7   2  912.79  100.67
  -2  -7   2  879.57   96.97
   2   7  -2  749.08   82.84
   2   7  -2  995.49  109.68
  -2  -8   2  130.33   15.02
  -2  -8   2  142.90   16.27
   2   8  -2  136.39   15.63
   2   8  -2  143.65   16.74
  -2  -9   2   83.14    9.80
  -2  -9   2   86.26   10.51
   2   9  -2   74.67    9.29
   2   9  -2   66.37    8.91
  -2 -10   2 4626.66  508.76
  -2 -10   2 4718.17  518.59
   2  10  -2 3670.82  403.69
   2  10  -2 4646.99  510.80
  -2 -11   2 1739.15  191.44
  -2 -11   2 1344.61  148.15
   2  11  -2 1492.73  164.36
   2  11  -2 1129.38  124.77
  -2 -12   2   32.95    4.81
  -2 -12   2   20.85    4.41
   2  12  -2   31.25    5.36
   2  12  -2   22.68    5.73
  -2 -13   2   89.31   10.47
  -2 -13   2   97.69   11.59
   2  13  -2   74.23   10.30
   2  13  -2  101.55   12.10
  -2 -14   2 1286.65  141.68
  -2 -14   2 1326.99  146.22
   2  14  -2 1018.54  112.67
   2  14  -2 1437.82  158.36
  -2 -15   2  319.70   35.52
  -2 -15   2  303.73   33.93
   2  15  -2  265.40   30.40
   2  15  -2  359.29   40.03
  -2 -16   2  105.38   12.24
  -2 -16   2   98.06   11.80
   2  16  -2  100.46   12.30
   2  16  -2   91.18   12.44
  -2 -17   2  348.10   38.64
  -2 -17   2  304.17   33.93
   2  17  -2  375.89   41.89
   2  17  -2  294.00   33.76
  -2 -18   2  945.67  104.13
  -2 -18   2 1005.66  110.77
   2  18  -2 1131.41  124.63
   2  18  -2  958.89  106.09
  -1  18   2  182.12   20.98
  -1  18   2  199.78   23.90
   1 -18  -2  201.13   22.47
   1 -18  -2  183.30   20.64
  -1  17   2  160.90   19.83
  -1  17   2  117.21   14.24
   1 -17  -2  124.94   14.51
   1 -17  -2  138.87   15.80
  -1  16   2  164.12   20.37
  -1  16   2  138.49   16.47
   1 -16  -2  150.60   17.22
   1 -16  -2  145.78   16.51
  -1  15   2  342.68   38.44
  -1  15   2  374.88   42.67
   1 -15  -2  403.35   44.71
   1 -15  -2  349.46   38.84
  -1  14   2   71.99   10.81
  -1  14   2   63.49    9.05
   1 -14  -2   80.50    9.63
   1 -14  -2   94.19   11.29
  -1  13   2   24.47    7.05
  -1  13   2   22.68    5.63
   1 -13  -2   28.00    4.37
   1 -13  -2   24.98    4.07
  -1  12   2   68.81    9.25
  -1  12   2   87.45   11.93
   1 -12  -2   82.67    9.83
   1 -12  -2   76.33    9.05
  -1  11   2  357.93   40.10
  -1  11   2  504.36   56.23
   1 -11  -2  459.62   50.81
   1 -11  -2  432.16   47.83
   1 -10  -2 1065.32  117.34
   1 -10  -2 1226.66  135.04
  -1   9   2   46.47    7.25
  -1   9   2   24.44    5.02
   1  -9  -2   29.66    4.14
   1  -9  -2   39.93    5.29
   1  -8  -2 1795.07  197.40
   1  -8  -2 1271.40  139.92
  -1   7   2    9.86    3.63
  -1   7   2    6.27    2.71
   1  -7  -2    3.63    1.86
   1  -7  -2    8.37    2.34
  -1   3   2 2915.98  320.54
  -1   2   2   74.33    8.27
  -1   2   2   65.15    7.32
   1  -2  -2   66.74    7.42
   1  -2  -2   64.57    7.22
  -1   1   2   14.91    1.83
  -1   1   2   17.42    2.03
   1  -1  -2   14.81    1.73
   1  -1  -2   17.66    2.03
  -1   0   2 1516.80  166.80
  -1   0   2 1749.66  192.39
   1   0  -2 1595.77  175.47
  -1  -1   2   14.71    2.07
  -1  -1   2   16.20    2.44
   1   1  -2   18.51    2.41
   1   1  -2   17.15    2.37
   1   2  -2   72.77    8.27
   1   2  -2   55.93    6.61
  -1  -3   2 3850.46  423.01
  -1  -3   2 3288.48  361.32
   1   3  -2 2738.03  301.09
  -1  -4   2 9182.13 1008.71
  -1  -5   2  304.07   33.76
  -1  -5   2  264.89   29.49
   1   5  -2  232.35   26.07
   1   5  -2  332.44   36.81
  -1  -6   2   30.91    4.75
  -1  -6   2   33.83    4.61
   1   6  -2   30.30    4.20
   1   6  -2   26.03    4.37
  -1  -7   2   13.66    3.12
  -1  -7   2   21.49    3.76
   1   7  -2    4.98    3.39
   1   7  -2    5.22    2.71
  -1  -8   2 1716.78  188.90
  -1  -8   2 1813.04  199.54
   1   8  -2 1347.66  148.63
   1   8  -2 1787.96  196.73
  -1  -9   2   44.74    6.03
  -1  -9   2   36.74    5.56
   1   9  -2   33.28    5.02
   1   9  -2   28.61    5.36
   1  10  -2 1200.22  132.22
   1  10  -2  830.09   91.92
  -1 -11   2  471.14   52.16
  -1 -11   2  552.15   61.21
  -1 -12   2   71.21    8.51
  -1 -12   2   92.77   11.42
   1  12  -2   65.15    9.32
   1  12  -2   76.91    9.59
  -1 -13   2   37.83    5.12
  -1 -13   2   31.69    5.29
   1  13  -2   30.03    5.56
   1  13  -2   26.30    6.71
  -1 -14   2   73.01    8.78
  -1 -14   2   80.23   10.24
   1  14  -2   81.86   10.30
   1  14  -2   59.76    9.35
  -1 -15   2  240.15   26.98
  -1 -15   2  339.29   37.62
   1  15  -2  314.24   35.93
   1  15  -2  388.77   43.32
  -1 -16   2  151.68   17.42
  -1 -16   2  176.90   19.93
   1  16  -2  169.27   19.56
   1  16  -2  136.56   17.05
  -1 -17   2  152.26   17.25
  -1 -17   2  126.29   14.68
   1  17  -2  117.78   15.18
   1  17  -2  142.12   16.85
  -1 -18   2  195.81   21.90
  -1 -18   2  185.64   20.88
   1  18  -2  213.94   24.34
   1  18  -2  186.32   21.86
   0  18   2  132.53   15.69
   0  18   2  179.27   21.52
   0 -18  -2  142.16   16.07
   0 -18  -2  113.14   12.98
   0  17   2  886.01   98.50
   0  17   2  803.99   88.91
   0 -17  -2  845.68   93.21
   0 -17  -2  893.47   98.46
   0  16   2   -5.05    6.64
   0  16   2    0.98    4.71
   0 -16  -2    7.59    2.75
   0 -16  -2    0.14    2.95
   0  15   2  960.24  106.02
   0  15   2 1130.73  125.14
   0 -15  -2 1221.91  134.56
   0 -15  -2 1254.45  138.09
   0  14   2  196.49   22.54
   0  14   2  213.03   24.88
   0 -14  -2  232.72   26.07
   0 -14  -2  234.45   26.13
   0  13   2  460.29   51.66
   0  13   2  354.54   39.62
   0 -13  -2  422.33   46.74
   0 -13  -2  412.50   45.69
   0  12   2   51.11    7.76
   0  12   2   65.08    9.69
   0 -12  -2   72.81    8.64
   0 -12  -2   57.01    7.19
   0  11   2 3221.71  354.54
   0  11   2 2620.75  288.41
   0 -11  -2 3447.11  379.28
   0 -11  -2 2892.93  318.10
   0  10   2  125.38   14.81
   0  10   2  182.22   21.35
   0 -10  -2  144.12   16.37
   0 -10  -2  204.15   22.88
   0   9   2    7.66    4.71
   0   9   2    0.75    3.19
   0  -9  -2    1.02    2.44
   0  -9  -2    4.10    2.17
   0   8   2  305.97   34.44
   0   8   2  232.01   26.00
   0  -8  -2  276.72   30.71
   0  -8  -2  269.13   29.90
   0   7   2  315.36   35.28
   0   7   2  234.32   26.20
   0  -7  -2  319.46   35.39
   0  -7  -2  254.75   28.27
   0   6   2  301.16   33.66
   0   6   2  245.94   27.45
   0  -6  -2  303.02   33.56
   0  -6  -2  251.94   27.93
   0   5   2  157.65   17.66
   0   5   2  113.11   12.98
   0  -5  -2  119.85   13.46
   0  -5  -2  117.58   13.22
   0   4   2  518.59   57.18
   0   4   2  489.44   54.10
   0  -4  -2  524.69   57.82
   0  -4  -2  537.57   59.25
   0  -2  -2   34.20    4.03
   0  -2  -2   22.91    2.95
   0   1   2  500.97   55.25
   0   1   2  510.46   56.23
   0  -1  -2  518.25   57.08
   0  -1  -2  564.01   62.10
   0   0   2 1150.39  126.53
   0   0   2 1227.67  135.04
   0   0  -2 1123.96  123.65
   0   0  -2 1189.71  130.80
   0  -1   2 1367.32  150.43
   0  -1   2 1228.35  135.14
   0   1  -2 1096.50  120.67
   0   1  -2 1150.39  126.50
   0  -2   2   30.10    3.90
   0  -2   2   36.30    4.71
   0   2  -2   26.00    3.76
   0   2  -2   35.96    4.37
   0  -4   2  504.70   55.76
   0  -4   2  624.01   68.84
   0   4  -2  664.68   73.25
   0   4  -2  504.70   55.86
   0  -5   2  126.09   14.37
   0  -5   2  141.31   16.00
   0   5  -2  158.22   17.76
   0   5  -2  132.87   15.35
   0  -6   2  367.76   40.78
   0  -6   2  278.18   31.01
   0   6  -2  280.58   31.52
   0   6  -2  348.44   38.64
   0  -7   2  387.42   43.01
   0  -7   2  335.70   37.32
   0   7  -2  306.58   34.47
   0   7  -2  409.11   45.35
   0  -8   2  310.82   34.71
   0  -8   2  318.10   35.45
   0   8  -2  268.72   30.40
   0   8  -2  334.20   37.15
   0  -9   2   -1.29    3.83
   0  -9   2    5.25    3.05
   0   9  -2    6.85    2.98
   0   9  -2    9.35    4.98
   0  10  -2  163.92   19.32
   0  10  -2  190.08   21.46
   0 -11   2 4002.99  439.96
   0 -11   2 3565.75  391.83
   0  11  -2 3443.72  378.61
   0  11  -2 2899.03  319.15
   0 -12   2   77.48    9.80
   0 -12   2   75.65    8.98
   0 -13   2  447.41   49.52
   0 -13   2  476.56   52.91
   0  13  -2  510.80   56.74
   0  13  -2  428.43   48.20
   0 -14   2  207.67   23.22
   0 -14   2  267.57   30.10
   0  14  -2  224.89   25.52
   0  14  -2  232.32   26.98
   0 -15   2 1216.49  133.95
   0 -15   2 1234.79  136.05
   0 -16   2    7.29    2.88
   0 -16   2   10.41    4.41
   0  16  -2   -5.42    6.81
   0  16  -2    5.19    3.93
   0 -17   2  793.48   87.55
   0 -17   2  982.27  108.23
   0  17  -2  840.93   93.38
   0  17  -2  975.83  107.72
   0 -18   2  149.44   16.98
   0 -18   2  138.16   15.59
   0  18  -2  120.09   15.05
   0  18  -2  157.10   18.13
   1  18   2  631.12   70.33
   1  18   2  594.52   65.82
  -1 -18  -2  691.12   76.20
  -1 -18  -2  721.62   79.52
   1  17   2  553.17   61.38
   1  17   2  533.84   59.79
  -1 -17  -2  670.10   73.92
  -1 -17  -2  704.34   77.69
   1  16   2   92.84   12.85
   1  16   2   77.75    9.80
  -1 -16  -2   90.53   10.71
  -1 -16  -2   89.69   10.51
   1  15   2  541.30   60.57
   1  15   2  500.29   55.59
  -1 -15  -2  749.42   82.67
  -1 -15  -2  669.76   73.89
   1  14   2  743.65   82.60
   1  14   2  697.22   77.08
  -1 -14  -2  970.07  106.94
  -1 -14  -2  861.61   94.97
   1  13   2  355.90   39.72
   1  13   2  412.16   46.47
  -1 -13  -2  425.04   47.15
  -1 -13  -2  439.96   48.67
   1  12   2  119.28   14.74
   1  12   2  106.16   12.91
  -1 -12  -2  112.73   12.98
  -1 -12  -2  124.83   14.30
   1  11   2 1533.41  169.00
   1  11   2 1773.38  195.54
  -1 -11  -2 1757.45  193.40
  -1 -11  -2 1979.46  217.74
   1  10   2 2718.71  299.05
   1  10   2 3082.06  339.29
  -1 -10  -2 3225.10  354.54
  -1 -10  -2 3089.86  339.97
   1   9   2   28.34    4.75
   1   9   2   17.96    5.32
  -1  -9  -2   34.78    5.02
  -1  -9  -2   22.30    3.66
   1   8   2   64.87    8.78
   1   8   2   53.25    7.08
  -1  -8  -2   56.16    6.81
  -1  -8  -2   82.23    9.56
   1   7   2  434.87   48.23
   1   7   2  527.07   58.54
  -1  -7  -2  454.19   50.20
  -1  -7  -2  489.10   54.03
   1   6   2  770.09   84.94
   1   6   2  715.86   79.14
  -1  -6  -2  814.49   89.72
  -1  -6  -2  713.83   78.70
   1   5   2   14.54    3.12
   1   5   2   17.96    3.63
  -1  -5  -2   14.24    2.61
  -1  -5  -2   21.05    3.53
   1   4   2 3779.28  415.55
   1   4   2 3430.17  376.91
  -1  -4  -2 3203.07  352.17
  -1  -4  -2 3592.86  394.88
   1   3   2 4972.38  546.39
   1   3   2 3830.13  420.97
  -1  -3  -2 4918.15  540.28
  -1  -3  -2 3931.81  432.16
  -1  -2  -2  268.72   29.73
  -1  -2  -2  208.42   23.18
   1   1   2  222.22   24.78
   1   1   2  155.71   17.46
  -1  -1  -2  261.80   29.01
  -1  -1  -2  177.64   19.76
   1   0   2 1293.43  142.36
   1   0   2 1216.49  133.92
  -1   0  -2 1331.39  146.49
  -1   0  -2 1309.02  143.99
   1  -1   2  412.16   45.59
   1  -1   2  418.26   46.27
  -1   1  -2  413.52   45.72
  -1   1  -2  392.84   43.35
   1  -2   2  339.97   37.69
   1  -2   2  363.01   40.23
  -1   2  -2  352.51   38.95
  -1   2  -2  314.04   34.88
   1  -3   2 4443.62  488.43
   1  -3   2 5094.41  559.94
  -1   3  -2 4294.49  472.16
   1  -4   2 3945.37  433.85
   1  -4   2 3592.86  394.88
  -1   4  -2 3789.45  416.23
  -1   4  -2 3609.81  397.25
   1  -5   2   16.30    3.90
   1  -5   2   27.08    4.17
  -1   5  -2   27.66    4.03
  -1   5  -2   19.73    4.37
   1  -6   2  869.40   95.92
   1  -6   2  783.99   86.53
  -1   6  -2  808.05   89.41
  -1   6  -2  914.48  100.77
   1  -7   2  522.66   57.82
   1  -7   2  557.91   61.76
  -1   7  -2  582.65   64.33
  -1   7  -2  437.24   48.84
   1  -8   2   68.40    8.37
   1  -8   2   75.48    9.56
  -1   8  -2   60.03    8.61
  -1   8  -2   74.77    9.08
   1  -9   2   28.54    5.36
   1  -9   2   28.71    4.85
  -1   9  -2   29.39    4.47
  -1   9  -2   24.30    6.10
   1 -10   2 3870.80  425.72
   1 -10   2 3616.59  397.59
  -1  10  -2 3311.87  364.37
  -1  10  -2 3823.35  420.64
   1 -11   2 1977.09  217.54
   1 -11   2 2335.36  257.03
  -1  11  -2 1861.51  205.23
  -1  11  -2 2217.41  244.01
   1 -12   2  152.29   17.73
   1 -12   2  134.50   15.39
  -1  12  -2  148.93   17.35
  -1  12  -2  133.92   16.64
   1 -13   2  566.38   62.81
   1 -13   2  463.00   51.28
  -1  13  -2  448.09   50.44
  -1  13  -2  503.68   55.93
   1 -14   2  920.92  101.45
   1 -14   2 1143.28  126.09
  -1  14  -2 1030.74  114.19
  -1  14  -2 1065.66  117.55
   1 -15   2  748.06   82.57
   1 -15   2  867.37   95.75
  -1  15  -2  846.70   93.99
  -1  15  -2  820.93   90.70
   1 -16   2  105.72   12.54
   1 -16   2   99.62   11.59
  -1  16  -2   92.06   12.61
  -1  16  -2  114.80   13.56
   1 -17   2  604.69   66.81
   1 -17   2  684.68   75.52
  -1  17  -2  638.58   70.67
  -1  17  -2  693.15   77.01
   1 -18   2  766.03   84.40
   1 -18   2  790.77   87.18
  -1  18  -2  718.57   79.35
  -1  18  -2  684.00   75.92
   2  17   2   80.94   11.49
   2  17   2   79.08   10.20
  -2 -17  -2   95.38   11.05
  -2 -17  -2   61.69    7.49
   2  16   2  157.51   19.22
   2  16   2  162.83   18.74
   2  15   2   89.25   12.30
   2  15   2   75.62    9.49
  -2 -15  -2  108.43   12.47
  -2 -15  -2   75.48    9.08
   2  14   2  104.09   13.56
   2  14   2   98.91   11.83
  -2 -14  -2   99.18   11.56
  -2 -14  -2  118.94   13.69
   2  13   2   83.25   10.54
   2  13   2   94.77   12.81
  -2 -13  -2  108.57   12.58
  -2 -13  -2   91.79   10.88
   2  12   2   46.61    6.68
   2  12   2   57.59    9.05
  -2 -12  -2   62.13    7.69
  -2 -12  -2   59.35    7.56
   2  11   2  216.49   24.40
   2  11   2  264.48   30.40
  -2 -11  -2  207.17   23.25
  -2 -11  -2  250.35   27.96
   2  10   2 1382.57  152.63
   2  10   2 1250.38  137.78
  -2 -10  -2 1310.72  144.29
  -2 -10  -2 1214.79  133.85
   2   9   2   33.86    5.22
   2   9   2   46.03    7.22
  -2  -9  -2   46.27    6.20
  -2  -9  -2   40.30    5.59
   2   8   2 1430.37  157.51
   2   8   2 1433.42  158.12
  -2  -8  -2 1422.91  156.63
  -2  -8  -2 1381.90  152.15
   2   7   2  105.55   12.34
   2   7   2  101.38   12.47
  -2  -7  -2  111.21   12.81
  -2  -7  -2   99.92   11.52
   2   6   2   12.34    3.66
   2   6   2   16.85    4.17
  -2  -6  -2   13.76    3.22
  -2  -6  -2   12.91    2.78
   2   5   2  216.59   24.23
   2   5   2  253.09   28.47
  -2  -5  -2  246.01   27.42
  -2  -5  -2  216.08   24.13
   2   3   2  276.89   30.84
   2   3   2  339.97   37.83
  -2  -3  -2  279.40   31.05
  -2  -3  -2  277.29   30.84
   2   2   2   24.00    3.83
   2   2   2   22.54    3.76
  -2  -2  -2   27.01    3.69
  -2  -2  -2   32.95    4.41
   2   1   2   39.42    5.19
   2   1   2   53.15    6.78
  -2  -1  -2   69.18    8.10
  -2  -1  -2   53.76    6.47
  -2   0  -2  173.03   19.46
  -2   0  -2  147.21   16.54
   2  -1   2   62.37    7.63
   2  -1   2   59.25    7.39
  -2   1  -2   78.06    9.19
  -2   1  -2   60.84    7.32
   2  -2   2   52.84    6.75
   2  -2   2   60.37    7.86
  -2   2  -2   38.20    5.46
  -2   2  -2   40.91    5.22
   2  -3   2  371.83   41.28
   2  -3   2  354.54   39.49
  -2   3  -2  363.01   40.20
  -2   3  -2  379.62   42.23
   2  -4   2 3511.51  386.06
   2  -5   2  268.07   30.10
   2  -5   2  250.11   28.03
  -2   5  -2  253.50   28.71
  -2   5  -2  283.09   31.56
   2  -6   2   12.88    3.59
   2  -6   2   19.93    4.75
  -2   6  -2   19.90    5.29
  -2   6  -2   11.90    3.05
   2  -7   2  129.14   14.98
   2  -7   2  137.21   15.96
  -2   7  -2  156.22   18.51
  -2   7  -2  123.11   14.07
   2  -8   2 1749.99  192.66
   2  -8   2 2078.44  228.79
  -2   8  -2 1839.82  202.45
  -2   8  -2 1545.95  170.53
   2  -9   2   58.84    7.63
   2  -9   2   42.33    6.81
  -2   9  -2   54.13    7.08
  -2   9  -2   62.37    9.29
   2 -10   2 1601.87  176.36
   2 -10   2 1706.61  188.02
  -2  10  -2 1598.15  175.95
  -2  10  -2 1354.10  149.54
   2 -11   2  246.01   27.59
   2 -11   2  300.21   33.79
  -2  11  -2  300.55   33.69
  -2  11  -2  280.14   31.93
   2 -12   2   72.30    8.95
   2 -12   2   74.87    9.97
  -2  12  -2   74.43    9.46
  -2  12  -2   65.38    9.46
   2 -13   2  139.44   15.96
   2 -13   2  137.07   16.30
  -2  13  -2  135.85   15.86
  -2  13  -2  116.94   14.81
  -2  14  -2  136.33   15.86
  -2  14  -2  122.09   15.29
   2 -15   2  103.89   12.07
   2 -15   2  123.65   14.71
  -2  15  -2  108.63   13.02
  -2  15  -2  113.75   14.24
   2 -16   2  187.54   21.05
   2 -16   2  213.78   24.10
  -2  16  -2  219.47   24.78
  -2  16  -2  200.52   23.52
   2 -17   2  124.70   14.30
   2 -17   2   95.01   11.32
  -2  17  -2  113.28   13.59
  -2  17  -2   81.52   11.22
   3  17   2  305.46   34.10
   3  17   2  377.25   42.47
  -3 -17  -2  385.72   42.64
  -3 -17  -2  351.83   38.95
   3  16   2    0.78    4.20
   3  16   2    7.97    6.61
  -3 -16  -2    2.03    2.61
  -3 -16  -2    3.93    2.61
   3  15   2  601.97   66.60
   3  15   2  734.50   81.69
  -3 -15  -2  685.36   75.62
  -3 -15  -2  633.16   69.93
  -3 -14  -2  173.34   19.56
  -3 -14  -2  146.83   16.68
   3  13   2  103.01   12.51
   3  13   2   95.82   12.91
  -3 -13  -2   94.94   11.22
  -3 -13  -2  101.45   11.86
   3  12   2   11.12    4.00
   3  12   2   11.29    6.00
  -3 -12  -2   18.40    3.49
  -3 -12  -2   19.02    3.93
   3  11   2 2040.47  224.55
   3  11   2 2406.54  265.13
  -3 -11  -2 2369.93  260.65
  -3 -11  -2 2272.32  250.01
   3  10   2  432.16   48.00
   3  10   2  450.46   50.50
  -3 -10  -2  436.23   48.37
  -3 -10  -2  469.44   51.99
   3   9   2  251.53   28.30
   3   9   2  253.16   28.98
  -3  -9  -2  264.96   29.56
  -3  -9  -2  254.01   28.44
   3   8   2   81.96   10.00
   3   8   2   78.74   10.47
  -3  -8  -2   69.93    8.61
  -3  -8  -2   75.15    9.19
   3   7   2  273.97   30.74
   3   7   2  283.50   32.03
  -3  -7  -2  319.80   35.62
  -3  -7  -2  289.46   32.30
   3   6   2  141.38   16.17
   3   6   2  153.17   17.86
  -3  -6  -2  151.24   17.18
  -3  -6  -2  155.37   17.66
   3   5   2  560.96   62.06
   3   5   2  651.12   72.20
  -3  -5  -2  631.12   69.72
  -3  -5  -2  575.20   63.59
  -3  -4  -2    9.32    2.75
  -3  -4  -2    5.76    3.02
   3   3   2 6565.45  721.62
   3   3   2 7236.56  795.17
   3   2   2   70.57    8.85
   3   2   2   92.13   10.98
  -3  -2  -2  104.77   12.03
  -3  -2  -2   93.75   10.91
   3   1   2 1294.79  142.77
   3   1   2 1098.87  121.07
  -3  -1  -2 1222.59  134.60
  -3  -1  -2 1431.04  157.51
   3   0   2   61.25    7.49
   3   0   2   86.23   10.44
   3  -1   2 1064.98  117.38
   3  -1   2 1103.62  121.72
  -3   1  -2 1329.36  146.46
  -3   1  -2  978.55  107.82
   3  -2   2  103.52   12.24
   3  -2   2  122.60   14.34
  -3   2  -2  125.85   14.47
  -3   2  -2  146.53   16.85
   3  -4   2    8.07    3.86
   3  -4   2    4.61    4.24
  -3   4  -2    7.76    3.39
  -3   4  -2   14.27    4.85
   3  -5   2  829.07   91.58
   3  -5   2  898.55   99.28
  -3   5  -2  877.88   96.84
  -3   5  -2  946.68  104.60
   3  -6   2  207.10   23.62
   3  -6   2  162.90   18.74
  -3   6  -2  176.90   20.03
  -3   6  -2  221.13   25.25
   3  -7   2  367.76   41.05
   3  -7   2  403.01   45.05
  -3   7  -2  368.10   41.35
  -3   7  -2  369.12   41.01
   3  -8   2   95.45   11.86
   3  -8   2  106.74   12.78
  -3   8  -2   97.28   12.54
  -3   8  -2   88.50   10.68
   3  -9   2  345.05   38.40
   3  -9   2  353.52   39.59
  -3   9  -2  328.17   37.25
  -3   9  -2  316.99   35.45
   3 -10   2  526.39   58.27
   3 -10   2  654.17   72.47
   3 -11   2 2717.02  298.85
   3 -11   2 3109.18  342.00
   3 -12   2   24.68    5.83
   3 -12   2   20.61    4.10
  -3  12  -2   21.56    6.24
  -3  12  -2   23.90    4.85
   3 -13   2  121.65   14.10
   3 -13   2  126.67   15.15
  -3  13  -2  127.68   15.08
  -3  13  -2  101.99   13.39
   3 -14   2  210.39   24.00
   3 -14   2  185.54   21.01
  -3  14  -2  210.15   23.86
  -3  14  -2  191.64   22.64
   3 -15   2  764.33   84.40
   3 -15   2  782.97   86.36
  -3  15  -2  808.05   89.28
  -3  15  -2  794.84   88.19
   3 -16   2    0.24    2.81
   3 -16   2    2.34    4.24
  -3  16  -2    2.81    5.90
  -3  16  -2    2.07    3.86
   3 -17   2  432.50   47.83
   3 -17   2  444.02   49.18
  -3  17  -2  667.39   74.09
  -3  17  -2  501.31   55.59
  -4 -16  -2   31.39    4.51
  -4 -16  -2   43.18    5.66
   4  15   2 1111.75  122.94
   4  15   2  789.07   87.18
  -4 -15  -2 1011.42  111.38
  -4 -15  -2  947.02  104.33
   4  14   2  383.35   42.71
   4  14   2  484.36   54.30
  -4 -14  -2  398.27   44.13
  -4 -14  -2  446.40   49.38
   4  13   2  719.25   79.45
   4  13   2  819.58   90.87
  -4 -13  -2  658.58   72.74
  -4 -13  -2  761.62   83.99
   4  12   2   22.10    6.07
   4  12   2   17.59    4.44
  -4 -12  -2   22.00    3.83
  -4 -12  -2   25.32    4.20
   4  11   2 1453.08  160.02
   4  11   2 1711.35  188.73
  -4 -11  -2 1901.50  209.27
  -4 -11  -2 1851.68  203.74
   4  10   2 1768.64  195.07
   4  10   2 1805.58  198.73
  -4 -10  -2 1748.64  192.46
  -4 -10  -2 1989.97  218.96
   4   9   2  317.53   35.45
   4   9   2  297.16   33.73
  -4  -9  -2  311.43   34.71
  -4  -9  -2  296.58   33.05
   4   8   2  142.12   16.44
   4   8   2  178.93   20.95
  -4  -8  -2  160.80   18.30
  -4  -8  -2  155.85   17.76
   4   7   2  490.12   54.33
   4   7   2  560.28   62.43
  -4  -7  -2  595.53   65.86
  -4  -7  -2  547.74   60.60
   4   6   2  431.14   47.89
   4   6   2  612.82   68.09
  -4  -6  -2  459.62   50.94
  -4  -6  -2  528.42   58.47
   4   5   2    1.59    3.19
   4   5   2    0.03    4.17
  -4  -5  -2    2.30    2.91
  -4  -5  -2    2.47    3.29
   4   4   2 2039.46  224.62
   4   4   2 2228.93  245.26
  -4  -4  -2 1895.74  208.62
  -4  -4  -2 2051.66  225.74
  -4  -3  -2 3307.47  363.69
  -4  -3  -2 3477.62  382.33
   4   2   2   74.37    9.49
   4   2   2   89.01   10.74
  -4  -2  -2  117.31   13.56
  -4  -2  -2   96.63   11.32
   4   1   2   23.96    4.75
   4   1   2   15.42    4.07
  -4  -1  -2   26.88    4.37
  -4  -1  -2   26.88    4.37
   4   0   2   26.68    5.25
   4   0   2   24.40    4.37
  -4   0  -2   29.62    4.85
  -4   0  -2   15.90    3.46
   4  -1   2   18.00    4.47
   4  -1   2   19.79    3.86
  -4   1  -2   15.18    3.56
  -4   1  -2   25.35    4.78
   4  -2   2   87.65   10.91
   4  -2   2   70.43    8.71
  -4   2  -2  106.29   12.74
  -4   2  -2   82.50    9.97
   4  -3   2 4413.12  485.38
   4  -3   2 4863.92  534.52
  -4   3  -2 5436.74  597.57
  -4   3  -2 4091.12  449.79
   4  -4   2 3017.66  331.97
   4  -4   2 3209.17  353.18
  -4   4  -2 2603.81  286.38
  -4   4  -2 3296.96  362.68
   4  -5   2    5.73    5.12
   4  -5   2    2.68    4.20
  -4   5  -2    1.83    4.54
  -4   5  -2    3.12    3.49
   4  -6   2  600.96   66.64
   4  -6   2  709.42   78.60
  -4   6  -2  643.66   71.48
  -4   6  -2  596.55   66.03
   4  -7   2  713.83   78.91
   4  -7   2  877.54   97.08
  -4   7  -2  708.74   78.60
  -4   7  -2  773.82   85.52
   4  -8   2  250.38   28.40
   4  -8   2  189.51   21.49
  -4   8  -2  185.41   21.56
  -4   8  -2  204.62   23.25
   4  -9   2  437.58   48.77
   4  -9   2  419.62   46.67
  -4   9  -2  415.55   46.50
  -4   9  -2  465.04   51.72
   4 -10   2 2814.97  309.73
   4 -10   2 3187.82  350.81
  -4  10  -2 2296.04  252.86
   4 -11   2 2512.29  276.48
   4 -11   2 3440.33  378.27
  -4  11  -2 2002.17  220.35
  -4  11  -2 2258.08  248.72
   4 -12   2   28.61    5.86
   4 -12   2   33.79    5.08
  -4  12  -2   27.18    6.51
  -4  12  -2   31.76    5.46
   4 -13   2  949.40  104.67
   4 -13   2 1053.79  116.26
  -4  13  -2  954.82  105.31
  -4  13  -2  903.30   99.96
   4 -14   2  606.38   67.04
   4 -14   2  557.57   61.82
  -4  14  -2  578.93   64.47
  -4  14  -2  611.13   67.65
   4 -15   2 1207.68  133.07
   4 -15   2 1415.11  155.78
  -4  15  -2 1364.95  150.39
  -4  15  -2 1208.01  133.34
   4 -16   2   63.62    8.17
   4 -16   2   53.86    6.85
  -4  16  -2   44.30    7.36
  -4  16  -2   57.79    7.76
   5  15   2   18.88    4.58
   5  15   2   20.68    6.95
  -5 -15  -2   17.18    3.59
  -5 -15  -2   17.86    3.25
   5  14   2  183.41   20.95
   5  14   2  225.54   25.93
  -5 -14  -2  182.42   20.57
  -5 -14  -2  191.27   21.49
   5  13   2  109.45   12.85
   5  13   2  141.34   17.25
  -5 -13  -2  131.17   14.95
  -5 -13  -2  117.34   13.52
   5  12   2   26.74    6.17
   5  12   2   20.10    4.03
  -5 -12  -2   24.07    3.86
  -5 -12  -2   25.52    4.30
   5  11   2   18.07    5.56
   5  11   2   28.00    4.75
  -5 -11  -2   19.22    3.69
  -5 -11  -2   20.74    3.59
  -5 -10  -2 1410.71  155.27
  -5 -10  -2 1752.71  192.86
   5   9   2  169.95   19.49
   5   9   2  189.98   22.37
  -5  -9  -2  193.03   21.83
  -5  -9  -2  173.30   19.59
   5   8   2  704.68   78.37
   5   8   2  548.08   60.67
  -5  -8  -2  672.48   74.26
  -5  -8  -2  621.29   68.67
   5   7   2   63.45    9.29
   5   7   2   57.93    7.63
  -5  -7  -2  100.91   11.86
  -5  -7  -2   65.89    8.13
   5   6   2   43.76    7.15
   5   6   2   47.93    6.34
  -5  -6  -2   44.06    5.80
  -5  -6  -2   48.06    6.44
   5   5   2  526.39   58.77
   5   5   2  459.62   51.01
  -5  -5  -2  509.78   56.50
  -5  -5  -2  433.85   48.16
   5   4   2 4694.45  516.56
   5   4   2 4352.11  478.60
  -5  -4  -2 3864.02  424.70
  -5  -4  -2 4457.18  489.78
   5   3   2   45.96    7.08
   5   3   2   40.44    6.81
  -5  -3  -2   42.74    5.69
  -5  -3  -2   41.42    6.03
   5   2   2  118.46   13.96
   5   2   2  131.92   15.93
  -5  -2  -2  127.21   14.64
  -5  -2  -2  134.70   15.76
   5   1   2  255.74   28.78
   5   1   2  255.26   29.01
  -5  -1  -2  287.29   32.17
  -5  -1  -2  262.72   29.39
   5   0   2  272.96   30.95
   5   0   2  233.60   26.44
  -5   0  -2  257.91   28.98
  -5   0  -2  291.26   32.64
   5  -1   2  217.61   24.64
   5  -1   2  228.04   26.10
  -5   1  -2  205.23   23.22
  -5   1  -2  228.04   25.83
   5  -2   2  103.79   12.54
   5  -2   2  123.48   14.78
   5  -3   2   35.05    6.20
   5  -3   2   43.69    6.64
  -5   3  -2   56.37    7.83
  -5   3  -2   38.17    6.00
   5  -4   2 5406.24  594.52
   5  -4   2 5592.66  615.19
  -5   4  -2 5070.68  557.57
  -5   4  -2 6277.34  690.10
   5  -5   2  872.79   96.53
   5  -5   2  767.04   84.91
  -5   5  -2  697.56   77.14
  -5   5  -2  737.55   81.59
   5  -6   2   61.99    8.85
   5  -6   2   89.58   10.88
  -5   6  -2   67.52    8.61
  -5   6  -2   62.67    8.74
   5  -7   2   81.28   10.51
   5  -7   2   77.65    9.63
  -5   7  -2   94.33   11.80
  -5   7  -2   83.08   10.34
   5  -8   2 1064.30  117.51
   5  -8   2  867.71   95.85
  -5   8  -2  953.46  105.41
  -5   8  -2 1059.89  116.97
   5  -9   2  261.43   29.59
   5  -9   2  253.40   28.57
  -5   9  -2  261.33   29.49
  -5   9  -2  221.67   25.39
   5 -10   2 2153.34  236.99
   5 -10   2 2387.56  262.75
  -5  10  -2 2249.94  247.74
  -5  10  -2 2413.32  265.53
   5 -11   2   34.13    6.51
   5 -11   2   31.39    4.81
  -5  11  -2   30.91    5.15
  -5  11  -2   48.54    7.63
   5 -12   2   34.47    6.34
   5 -12   2   38.17    5.52
  -5  12  -2   34.20    5.76
  -5  12  -2   36.88    6.71
  -5  13  -2  184.86   21.12
  -5  13  -2  166.39   19.46
   5 -14   2  275.53   30.74
   5 -14   2  266.79   29.86
  -5  14  -2  229.47   26.07
  -5  14  -2  272.48   30.64
   5 -15   2   20.54    4.44
   5 -15   2   24.68    4.30
  -5  15  -2   16.81    5.02
  -5  15  -2   20.57    4.51
   6  14   2   56.84    7.42
   6  14   2   74.50   10.85
  -6 -14  -2   57.89    7.08
  -6 -14  -2   51.11    6.51
   6  13   2   12.03    5.29
   6  13   2    9.97    4.14
  -6 -13  -2    8.41    2.91
  -6 -13  -2    4.17    2.95
   6  12   2    0.68    3.15
   6  12   2    0.41    5.49
   6  11   2  736.54   81.35
   6  11   2  997.19  110.43
  -6 -11  -2  750.09   82.77
  -6 -11  -2  866.35   95.55
   6  10   2  280.34   31.39
   6  10   2  321.73   36.57
  -6 -10  -2  290.38   32.37
  -6 -10  -2  314.68   35.05
   6   9   2  300.55   34.30
   6   9   2  261.26   29.29
  -6  -9  -2  283.16   31.62
  -6  -9  -2  259.57   29.01
   6   8   2   35.45    5.39
   6   8   2   30.06    6.68
  -6  -8  -2   25.46    4.44
  -6  -8  -2   25.05    4.20
   6   7   2  181.88   21.35
   6   7   2  217.94   24.57
  -6  -7  -2  188.76   21.25
  -6  -7  -2  175.41   19.90
   6   6   2    9.39    4.88
   6   6   2   10.20    3.42
  -6  -6  -2    5.36    2.71
  -6  -6  -2    5.29    3.19
  -6  -5  -2  507.07   56.16
  -6  -5  -2  705.69   77.96
   6   4   2  604.69   67.04
   6   4   2  567.40   63.38
  -6  -4  -2  621.97   68.84
  -6  -4  -2  571.81   63.21
   6   3   2 4826.64  530.46
   6   3   2 5555.38  611.13
  -6  -3  -2 4830.03  530.79
  -6  -3  -2 4057.22  446.06
   6   2   2  109.82   13.08
   6   2   2  117.17   14.30
  -6  -2  -2  141.61   16.24
  -6  -2  -2   96.09   11.49
   6   1   2  906.69  100.06
   6   1   2 1119.55  123.68
  -6  -1  -2 1028.37  113.45
  -6  -1  -2 1057.86  116.63
   6   0   2   24.44    5.36
   6   0   2   22.95    4.41
  -6   0  -2   28.54    4.88
  -6   0  -2   24.61    4.41
   6  -1   2  951.09  105.14
   6  -1   2  875.51   96.70
  -6   1  -2  931.09  102.74
  -6   1  -2  935.84  103.28
   6  -2   2   99.79   12.44
   6  -2   2   85.35   10.44
  -6   2  -2  109.31   12.81
  -6   2  -2   95.99   11.59
   6  -3   2 4738.51  520.96
   6  -3   2 4616.49  507.75
  -6   3  -2 4440.23  488.43
  -6   3  -2 3904.69  429.45
   6  -4   2  730.10   80.87
   6  -4   2  626.38   69.42
  -6   4  -2  580.28   64.30
  -6   4  -2  777.21   85.99
   6  -5   2  924.65  102.19
   6  -5   2  798.56   88.30
  -6   5  -2  898.22   99.24
  -6   5  -2  763.31   84.43
   6  -6   2   12.37    3.93
   6  -6   2    7.32    4.75
  -6   6  -2   18.57    5.15
  -6   6  -2   12.61    4.98
   6  -7   2  294.68   33.18
   6  -7   2  297.26   33.39
  -6   7  -2  300.44   33.79
  -6   7  -2  283.70   32.00
   6  -8   2   36.78    5.86
   6  -8   2   29.15    6.07
  -6   8  -2   49.15    7.49
  -6   8  -2   52.84    7.86
   6  -9   2  444.02   49.32
   6  -9   2  390.81   43.66
  -6   9  -2  434.87   48.54
  -6   9  -2  491.82   54.67
   6 -10   2  403.69   44.98
   6 -10   2  493.17   54.77
  -6  10  -2  467.75   52.10
  -6  10  -2  484.70   53.83
  -6  11  -2 1236.49  136.39
  -6  11  -2 1258.86  138.73
   6 -12   2    3.15    3.29
   6 -12   2    7.25    4.27
  -6  12  -2    2.54    4.61
  -6  12  -2   -1.63    4.41
   6 -13   2    6.75    3.22
   6 -13   2   12.95    4.17
  -6  13  -2   10.78    4.61
  -6  13  -2    8.17    4.64
  -6  14  -2   74.37    9.73
  -6  14  -2   82.70   10.00
   7  13   2  456.90   50.61
   7  13   2  491.14   54.71
  -7 -13  -2  513.51   56.71
  -7 -13  -2  456.90   50.54
   7  12   2   12.88    5.36
   7  12   2   13.46    3.49
  -7 -12  -2   13.35    3.22
  -7 -12  -2   13.56    3.19
   7  11   2 1506.63  166.29
   7  11   2 1384.95  152.53
  -7 -11  -2 1436.47  158.15
  -7 -11  -2 1379.18  151.78
   7  10   2  494.53   54.81
   7  10   2  505.71   56.60
  -7 -10  -2  499.95   55.32
  -7 -10  -2  467.07   51.72
   7   9   2  280.58   32.10
   7   9   2  242.86   27.29
  -7  -9  -2  222.52   24.95
  -7  -9  -2  263.84   29.56
   7   8   2  270.99   31.05
   7   8   2  264.28   29.66
  -7  -8  -2  244.31   27.39
  -7  -8  -2  256.79   28.64
   7   7   2  339.97   38.47
   7   7   2  391.83   43.66
  -7  -7  -2  353.86   39.35
  -7  -7  -2  348.78   38.78
   7   6   2   81.31   10.78
   7   6   2   95.04   11.69
  -7  -6  -2   78.40    9.52
  -7  -6  -2   77.82    9.39
   7   5   2   12.74    4.03
   7   5   2   16.07    5.73
  -7  -5  -2   14.27    3.69
  -7  -5  -2   11.66    3.22
   7   4   2 1185.98  130.73
   7   4   2 1630.01  179.95
  -7  -4  -2 1598.48  176.05
  -7  -4  -2 1209.71  133.21
   7   3   2 4511.41  495.88
   7   3   2 5192.70  571.47
  -7  -3  -2 5107.96  561.64
  -7  -3  -2 4585.98  504.02
   7   2   2    8.61    3.93
   7   2   2    2.81    5.08
  -7  -2  -2   12.24    3.83
  -7  -2  -2   12.64    3.90
   7   1   2   37.79    5.80
   7   1   2   22.91    5.22
  -7  -1  -2   31.90    5.46
  -7  -1  -2   36.98    5.80
   7   0   2  555.54   61.59
   7   0   2  553.50   61.55
  -7   0  -2  548.08   60.67
  -7   0  -2  596.21   65.99
   7  -1   2   27.96    5.19
   7  -1   2   35.66    6.27
  -7   1  -2   34.44    5.32
  -7   1  -2   28.13    4.61
   7  -2   2   10.91    4.20
   7  -2   2   20.30    5.22
  -7   2  -2    6.58    3.63
  -7   2  -2   11.19    3.59
   7  -3   2 4209.75  463.00
   7  -3   2 4179.24  459.62
  -7   3  -2 3925.03  431.82
  -7   3  -2 4335.16  476.56
   7  -4   2 1172.09  129.28
   7  -4   2 1376.81  151.88
  -7   4  -2 1278.86  141.00
  -7   4  -2 1177.17  129.82
   7  -5   2   17.35    4.61
   7  -5   2   18.10    4.98
  -7   5  -2   19.69    5.02
  -7   5  -2   11.69    4.41
   7  -6   2  104.60   12.74
   7  -6   2  143.17   16.81
  -7   6  -2  103.14   12.51
  -7   6  -2  124.67   15.15
   7  -7   2  575.87   63.93
   7  -7   2  539.95   59.89
  -7   7  -2  559.27   62.06
  -7   7  -2  576.89   64.10
  -7   8  -2  429.11   47.76
  -7   8  -2  401.99   44.84
   7  -9   2  411.82   45.86
   7  -9   2  384.71   42.84
  -7   9  -2  386.74   43.08
  -7   9  -2  437.58   48.71
   7 -10   2  759.59   83.92
   7 -10   2  750.77   82.97
  -7  10  -2  719.93   79.62
  -7  10  -2  768.40   84.94
  -7  11  -2 2253.00  247.94
  -7  11  -2 2582.45  284.14
   7 -12   2   22.34    4.68
   7 -12   2   20.91    4.71
  -7  12  -2   23.25    5.29
   7 -13   2  669.42   73.92
   7 -13   2  702.98   77.55
  -7  13  -2  670.10   74.03
  -7  13  -2  796.19   87.92
   8  11   2   40.03    7.46
   8  11   2   40.98    5.66
  -8 -11  -2   38.30    5.32
  -8 -11  -2   36.03    4.95
   8  10   2 1678.48  185.30
   8  10   2 1401.55  154.36
  -8 -10  -2 1482.22  163.14
  -8 -10  -2 1238.18  136.29
   8   9   2  139.00   17.05
   8   9   2  117.82   13.73
  -8  -9  -2  143.17   16.41
  -8  -9  -2  141.10   16.17
   8   8   2  273.50   31.39
   8   8   2  277.77   31.01
  -8  -8  -2  291.02   32.51
  -8  -8  -2  257.84   28.74
   8   7   2   10.54    3.25
   8   7   2   22.27    6.24
  -8  -7  -2   18.30    3.97
  -8  -7  -2    9.49    2.91
   8   6   2  278.79   31.12
   8   6   2  259.13   29.66
  -8  -6  -2  283.84   31.73
  -8  -6  -2  245.43   27.42
   8   5   2  392.16   43.49
   8   5   2  399.28   44.84
  -8  -5  -2  400.64   44.54
  -8  -5  -2  365.05   40.54
   8   4   2 3051.22  335.56
   8   4   2 3494.57  384.71
  -8  -4  -2 3653.87  401.65
  -8  -4  -2 3327.46  365.73
   8   3   2  481.65   53.42
   8   3   2  573.16   63.93
  -8  -3  -2  617.90   68.37
  -8  -3  -2  513.51   56.84
   8   2   2  183.57   20.98
   8   2   2  208.01   24.13
  -8  -2  -2  204.86   23.25
  -8  -2  -2  248.92   27.96
   8   1   2  248.89   28.23
   8   1   2  281.19   31.66
  -8  -1  -2  268.14   30.06
  -8  -1  -2  252.18   28.30
   8   0   2   77.82    9.90
   8   0   2   51.69    7.46
  -8   0  -2   80.70    9.93
  -8   0  -2   65.08    8.17
   8  -1   2  220.18   25.12
   8  -1   2  302.38   33.93
  -8   1  -2  237.03   26.61
  -8   1  -2  271.02   30.30
   8  -2   2  187.68   21.42
   8  -2   2  176.15   20.34
  -8   2  -2  198.15   22.40
  -8   2  -2  200.62   22.68
   8  -3   2  365.05   40.81
   8  -3   2  504.70   56.10
  -8   3  -2  555.54   61.55
  -8   3  -2  426.40   47.35
   8  -4   2 3203.75  352.51
   8  -4   2 3687.77  405.72
  -8   4  -2 3647.09  400.98
  -8   4  -2 3089.86  339.97
   8  -5   2  424.36   47.25
   8  -5   2  417.25   46.50
  -8   5  -2  364.37   40.71
  -8   5  -2  439.96   48.98
   8  -6   2  338.95   37.96
   8  -6   2  328.44   36.81
  -8   6  -2  301.19   33.86
  -8   6  -2  314.44   35.22
   8  -7   2   20.61    4.75
   8  -7   2   20.30    4.98
  -8   7  -2   10.74    4.41
  -8   7  -2   10.85    4.37
   8  -8   2  396.23   44.10
   8  -8   2  384.71   42.88
  -8   8  -2  396.57   44.20
  -8   8  -2  346.74   38.71
   8  -9   2  180.90   20.68
   8  -9   2  178.15   20.27
  -8   9  -2  184.86   21.18
  -8   9  -2  189.07   21.66
  -8  10  -2 2049.29  225.54
  -8  10  -2 2081.15  229.03
   8 -11   2   57.28    7.76
   8 -11   2   62.03    8.00
  -8  11  -2   70.70    9.42
  -8  11  -2   54.27    7.52
   9   9   2  103.52   13.12
   9   9   2  105.55   12.54
  -9  -9  -2   98.43   11.56
  -9  -9  -2   91.55   10.58
   9   8   2  120.84   13.96
   9   8   2  163.81   19.83
  -9  -8  -2  136.39   15.46
  -9  -8  -2  146.87   16.74
   9   7   2  106.63   12.54
   9   7   2  141.88   17.32
  -9  -7  -2  141.14   16.20
  -9  -7  -2  105.72   12.20
   9   6   2   18.03    6.00
   9   6   2   18.24    4.34
  -9  -6  -2   16.68    4.24
  -9  -6  -2    9.52    3.53
   9   5   2  240.01   26.84
   9   5   2  300.44   34.03
  -9  -5  -2  307.05   34.37
  -9  -5  -2  280.38   31.22
   9   4   2 1711.35  188.35
   9   4   2 2010.99  221.57
  -9  -4  -2 1986.92  218.62
  -9  -4  -2 2094.71  230.45
   9   3   2 2298.08  252.82
   9   3   2 2602.45  286.51
  -9  -3  -2 2509.24  276.01
  -9  -3  -2 2321.12  255.33
   9   2   2   37.11    6.88
   9   2   2   34.37    5.83
  -9  -2  -2   35.66    5.69
  -9  -2  -2   29.18    4.75
   9   1   2  685.69   75.79
   9   1   2  629.09   69.79
  -9  -1  -2  640.27   70.74
  -9  -1  -2  575.54   63.62
   9   0   2   26.64    5.93
   9   0   2   32.57    5.52
  -9   0  -2   22.68    4.75
  -9   0  -2   29.62    5.36
   9  -1   2  561.30   62.30
   9  -1   2  637.90   70.64
  -9   1  -2  519.61   57.52
  -9   1  -2  669.76   74.06
   9  -2   2   32.74    5.59
   9  -2   2   30.34    5.73
  -9   2  -2   34.13    6.13
  -9   2  -2   36.13    5.59
   9  -3   2 2178.43  239.77
   9  -3   2 2632.96  289.70
  -9   3  -2 2305.87  253.67
  -9   3  -2 2728.54  300.17
   9  -4   2 1853.71  204.12
   9  -4   2 2011.66  221.47
  -9   4  -2 1924.89  211.84
  -9   4  -2 2285.53  251.50
   9  -5   2  306.88   34.40
   9  -5   2  314.58   35.25
  -9   5  -2  329.63   36.84
  -9   5  -2  265.57   29.79
   9  -6   2   15.69    4.54
   9  -6   2   11.63    4.91
  -9   6  -2   15.83    5.08
  -9   6  -2   16.24    4.34
   9  -7   2  144.87   16.85
   9  -7   2  136.36   15.90
  -9   7  -2  147.71   17.25
  -9   7  -2  120.80   14.30
   9  -8   2  150.32   17.35
   9  -8   2  193.85   22.00
  -9   8  -2  155.07   17.86
  -9   8  -2  160.80   18.61
   9  -9   2  140.70   16.27
   9  -9   2  142.80   16.41
  -9   9  -2  136.39   15.93
  -9   9  -2  127.75   15.08
  10   6   2   10.68    3.80
  10   6   2   12.64    5.25
 -10  -6  -2    5.83    4.00
 -10  -6  -2    7.42    3.15
  10   5   2    0.64    3.08
  10   5   2    3.12    4.75
 -10  -5  -2    4.07    3.15
 -10  -5  -2    4.30    3.29
  10   4   2  746.03   82.30
  10   4   2  731.45   81.01
 -10  -4  -2  589.43   65.04
 -10  -4  -2  664.00   73.28
  10   3   2 2977.67  327.63
  10   3   2 2964.11  325.97
 -10  -3  -2 3200.70  351.83
 -10  -3  -2 2889.88  317.73
  10   2   2    9.22    4.20
  10   2   2   11.52    5.19
 -10  -2  -2    6.27    3.63
 -10  -2  -2    8.95    3.42
  10   1   2  115.65   13.52
  10   1   2  122.60   14.85
 -10  -1  -2  138.26   16.03
 -10  -1  -2  118.16   13.63
  10   0   2  762.30   84.16
  10   0   2  675.53   74.77
 -10   0  -2  712.13   78.60
 -10   0  -2  745.35   82.26
  10  -1   2  100.06   12.30
  10  -1   2  138.12   16.07
 -10   1  -2  124.97   14.57
 -10   1  -2  125.55   14.57
  10  -2   2    8.47    4.20
  10  -2   2   13.15    4.64
 -10   2  -2    9.42    3.90
 -10   2  -2   18.95    4.27
  10  -3   2 2407.56  264.85
  10  -3   2 2660.41  292.61
 -10   3  -2 2883.44  317.02
 -10   3  -2 3494.57  384.37
  10  -4   2  716.88   79.25
  10  -4   2  826.02   91.25
 -10   4  -2  684.00   75.55
 -10   4  -2  812.46   89.62
  10  -5   2    2.88    4.03
  10  -5   2    2.98    4.14
 -10   5  -2   -1.39    3.83
 -10   5  -2    0.68    3.53
  10  -6   2   12.41    4.64
  10  -6   2    8.07    3.97
 -10   6  -2   17.66    4.54
 -10   6  -2    4.47    3.76
 -12   6   3    7.46    4.51
 -12   6   3   10.27    6.27
  12  -6  -3   13.05    4.61
  12  -6  -3    6.68    3.80
 -12   5   3  579.60   64.43
 -12   5   3  656.54   72.64
  12  -5  -3  558.93   61.89
  12  -5  -3  549.78   60.77
 -12   4   3   36.03    7.12
 -12   4   3   45.42    7.05
  12  -4  -3   38.47    6.07
  12  -4  -3   40.27    6.41
 -12   3   3  366.07   40.84
 -12   3   3  416.91   46.50
  12  -3  -3  336.03   37.56
  12  -3  -3  360.64   40.23
 -12   2   3 1597.81  175.95
 -12   2   3 1507.65  166.09
  12  -2  -3 1368.00  150.70
  12  -2  -3 1377.49  151.71
 -12   1   3  296.72   33.39
 -12   1   3  321.43   35.93
  12  -1  -3  277.53   31.08
  12  -1  -3  263.43   29.66
 -12   0   3    0.27    3.80
 -12   0   3   -0.14    5.15
  12   0  -3    2.54    4.68
  12   0  -3    3.05    3.53
 -12  -1   3  279.97   31.62
 -12  -1   3  281.06   31.45
  12   1  -3  279.70   31.22
  12   1  -3  257.80   29.12
 -12  -2   3 1376.81  151.61
 -12  -2   3 1376.13  151.61
  12   2  -3 1358.51  149.75
  12   2  -3 1217.51  134.09
 -12  -3   3  345.05   38.61
 -12  -3   3  313.19   34.91
  12   3  -3  311.66   35.12
  12   3  -3  307.43   34.23
 -12  -4   3   33.73    5.42
 -12  -4   3   35.25    6.13
  12   4  -3   34.74    7.02
  12   4  -3   19.18    3.97
 -12  -5   3  483.34   53.59
 -12  -5   3  393.86   43.66
  12   5  -3  379.28   42.06
  12   5  -3  434.87   48.47
 -12  -6   3    3.73    3.25
 -12  -6   3    4.64    4.03
  12   6  -3    5.93    3.69
  12   6  -3   12.30    4.71
  11  -9  -3 1277.50  140.66
  11  -9  -3 1465.62  161.31
  11  -8  -3  229.74   25.76
  11  -8  -3  195.27   22.13
 -11   7   3   14.88    4.81
 -11   7   3    6.98    5.83
  11  -7  -3   17.56    4.20
  11  -7  -3   12.47    4.30
 -11   6   3 1402.23  154.43
 -11   6   3 1140.56  125.92
  11  -6  -3 1295.12  142.63
  11  -6  -3 1240.55  136.73
 -11   5   3  912.45  100.97
 -11   5   3 1013.80  111.79
  11  -5  -3  750.43   82.97
  11  -5  -3  924.31  101.96
 -11   4   3    2.71    5.73
 -11   4   3    4.51    5.02
  11  -4  -3    8.98    4.17
  11  -4  -3    9.49    4.17
 -11   3   3 1996.07  219.81
 -11   3   3 1865.58  205.40
  11  -3  -3 1728.30  190.29
  11  -3  -3 1874.39  206.39
 -11   2   3 2829.89  311.29
 -11   2   3 2484.16  273.33
  11  -2  -3 2153.68  237.03
  11  -2  -3 2336.38  257.13
 -11   1   3  243.98   27.66
 -11   1   3  261.60   29.52
  11  -1  -3  211.03   23.93
  11  -1  -3  246.75   27.86
 -11   0   3    0.68    4.98
 -11   0   3   18.51    4.95
  11   0  -3    1.59    4.20
  11   0  -3    7.93    4.64
 -11  -1   3  202.49   23.12
 -11  -1   3  217.81   24.61
  11   1  -3  198.83   22.74
  11   1  -3  200.25   22.74
 -11  -2   3 2098.43  230.99
 -11  -2   3 2069.96  227.77
  11   2  -3 1891.00  208.25
  11   2  -3 1767.96  194.59
 -11  -3   3 1367.66  150.66
 -11  -3   3 1464.60  161.24
  11   3  -3 1306.99  143.99
  11   3  -3 1352.41  149.10
 -11  -4   3   11.80    4.30
 -11  -4   3    3.02    3.93
  11   4  -3    0.85    3.66
  11   4  -3    8.61    4.88
 -11  -5   3  636.55   70.37
 -11  -5   3  521.30   57.86
  11   5  -3  658.92   73.08
  11   5  -3  625.70   69.15
 -11  -6   3  846.36   93.41
 -11  -6   3  827.71   91.45
  11   6  -3  857.88   94.87
  11   6  -3  883.64   97.52
 -11  -7   3    8.17    4.47
 -11  -7   3    5.76    3.19
  11   7  -3   12.54    5.02
  11   7  -3   10.27    4.20
 -11  -8   3  163.58   18.54
 -11  -8   3  149.21   17.18
  11   8  -3  144.90   17.12
  11   8  -3  174.56   19.79
 -11  -9   3  980.58  108.02
 -11  -9   3  915.16  100.91
  11   9  -3 1186.66  130.66
  11   9  -3  979.90  108.12
  10 -11  -3  162.63   18.44
  10 -11  -3  143.21   16.34
 -10  10   3  811.44   89.82
 -10  10   3 1129.72  124.63
  10 -10  -3 1108.02  122.09
  10 -10  -3 1670.00  183.81
 -10   9   3  132.77   15.69
 -10   9   3   95.65   12.71
  10  -9  -3  124.22   14.41
  10  -9  -3  119.95   13.96
 -10   8   3 1927.60  212.18
 -10   8   3 1356.14  149.65
  10  -8  -3 1449.35  159.65
  10  -8  -3 1915.06  210.76
 -10   7   3  230.82   26.47
 -10   7   3  346.41   38.74
  10  -7  -3  336.88   37.56
  10  -7  -3  245.57   27.62
 -10   6   3   91.99   11.90
 -10   6   3  113.14   13.63
  10  -6  -3  102.84   12.24
  10  -6  -3   98.30   12.00
 -10   5   3   27.25    5.39
 -10   5   3   41.18    7.63
  10  -5  -3   31.49    5.19
  10  -5  -3   28.95    5.39
 -10   4   3 1038.88  114.80
 -10   4   3 1113.45  122.77
  10  -4  -3 1253.77  138.19
  10  -4  -3  969.39  106.90
 -10   3   3    1.12    4.91
 -10   3   3   12.85    5.05
  10  -3  -3    1.69    4.07
  10  -3  -3   -1.15    3.83
 -10   2   3 3514.90  386.74
 -10   2   3 3416.61  375.89
  10  -2  -3 3613.20  397.25
  10  -2  -3 3098.00  340.64
 -10   1   3  603.33   66.91
 -10   1   3  554.18   61.49
  10  -1  -3  541.98   60.23
  10  -1  -3  371.15   41.35
 -10   0   3    2.34    4.24
 -10   0   3   -0.27    4.88
  10   0  -3    3.66    5.25
  10   0  -3    0.64    3.36
 -10  -1   3  511.14   56.67
 -10  -1   3  547.40   60.77
  10   1  -3  431.82   48.00
  10   1  -3  477.24   53.22
 -10  -2   3 3011.90  331.26
 -10  -2   3 2420.10  266.35
  10   2  -3 2564.49  282.28
  10   2  -3 2957.67  325.29
 -10  -3   3   -2.00    4.34
 -10  -3   3    0.47    3.86
  10   3  -3    4.47    4.34
  10   3  -3    2.00    3.12
 -10  -4   3  594.52   65.89
 -10  -4   3  634.17   70.09
  10   4  -3  623.67   69.25
  10   4  -3  637.22   70.47
 -10  -5   3   20.71    4.34
 -10  -5   3   30.44    6.07
  10   5  -3   30.10    5.80
  10   5  -3   15.08    4.30
 -10  -6   3   54.20    7.19
 -10  -6   3   66.60    8.85
  10   6  -3   66.26    8.34
  10   6  -3   64.84    9.19
 -10  -7   3  209.91   23.83
 -10  -7   3  205.23   23.12
  10   7  -3  228.25   26.10
  10   7  -3  223.60   25.15
 -10  -8   3 1272.08  140.09
 -10  -8   3 1135.48  125.21
  10   8  -3 1326.31  146.05
  10   8  -3 1140.56  125.92
 -10  -9   3   79.45    9.90
 -10  -9   3   87.72   10.51
  10   9  -3   74.33    9.90
  10   9  -3   92.84   11.08
 -10 -10   3  849.75   93.69
 -10 -10   3  775.18   85.58
  10  10  -3  940.92  103.72
  10  10  -3  728.06   80.60
 -10 -11   3  124.39   14.44
 -10 -11   3  131.65   15.12
  10  11  -3  131.48   15.66
  10  11  -3  167.51   18.88
   9 -13  -3  215.06   24.07
   9 -13  -3  205.20   23.05
  -9  12   3   10.61    5.52
  -9  12   3   17.59    5.90
   9 -12  -3   21.35    3.93
   9 -12  -3   13.52    3.83
  -9  11   3  320.98   36.20
  -9  11   3  401.65   44.88
   9 -11  -3  342.68   38.13
   9 -11  -3  341.32   37.96
  -9  10   3 1192.08  131.48
  -9  10   3 1147.68  126.73
   9 -10  -3 1266.99  139.55
   9 -10  -3 1465.62  161.37
  -9   9   3 1203.61  132.77
  -9   9   3 1087.69  120.16
   9  -9  -3 1115.82  122.97
   9  -9  -3 1195.13  131.68
  -9   8   3   46.00    7.46
  -9   8   3   52.23    7.63
   9  -8  -3   68.60    8.64
   9  -8  -3   59.66    8.03
  -9   7   3  414.20   46.13
  -9   7   3  338.64   38.17
   9  -7  -3  397.93   44.20
   9  -7  -3  354.88   39.56
  -9   6   3   15.39    5.63
  -9   6   3   31.22    5.80
   9  -6  -3    7.69    3.63
   9  -6  -3   22.78    4.68
  -9   5   3  778.57   85.96
  -9   5   3  612.48   68.03
   9  -5  -3  603.33   66.81
   9  -5  -3  716.20   79.11
  -9   4   3  191.40   22.30
  -9   4   3  247.64   27.86
   9  -4  -3  222.86   25.08
   9  -4  -3  202.69   22.98
  -9   3   3   61.15    8.37
  -9   3   3   56.30    8.34
   9  -3  -3   50.37    6.85
   9  -3  -3   49.18    6.85
  -9   2   3 2997.33  329.73
  -9   2   3 3014.27  331.59
   9  -2  -3 2871.24  315.80
   9  -2  -3 2715.32  298.75
  -9   1   3  231.54   26.20
  -9   1   3  206.35   23.56
   9  -1  -3  197.95   22.51
   9  -1  -3  189.57   21.73
  -9   0   3    1.46    3.76
  -9   0   3    6.98    4.88
   9   0  -3   -0.92    4.34
   9   0  -3    4.07    3.53
  -9  -1   3  134.26   15.93
  -9  -1   3  188.02   21.42
   9   1  -3  146.53   17.22
   9   1  -3  159.31   18.20
   9   2  -3 1732.37  190.86
   9   2  -3 1906.93  209.88
  -9  -3   3   29.93    5.39
  -9  -3   3   37.79    5.69
  -9  -4   3  152.36   17.52
  -9  -4   3  142.90   16.61
   9   4  -3  160.63   18.27
   9   4  -3  147.24   17.29
  -9  -5   3  433.85   48.27
  -9  -5   3  443.01   49.22
   9   5  -3  440.29   49.11
   9   5  -3  463.00   51.35
  -9  -6   3   10.00    4.61
  -9  -6   3   -0.51    3.12
   9   6  -3    8.78    3.32
   9   6  -3    6.07    4.34
  -9  -7   3  268.38   29.96
  -9  -7   3  281.84   31.62
   9   7  -3  195.30   22.54
   9   7  -3  255.87   28.61
  -9  -8   3   51.42    6.78
  -9  -8   3   42.98    6.51
   9   8  -3   32.30    6.07
   9   8  -3   48.77    6.54
  -9  -9   3  859.58   94.91
  -9  -9   3  936.86  103.31
   9   9  -3 1000.92  110.29
   9   9  -3  879.57   97.31
  -9 -10   3 1047.69  115.55
  -9 -10   3 1016.51  112.02
   9  10  -3 1249.71  137.88
   9  10  -3 1080.91  119.07
  -9 -11   3  289.67   32.27
  -9 -11   3  318.04   35.56
   9  11  -3  307.70   34.23
   9  11  -3  273.74   30.91
  -9 -12   3   21.32    4.27
  -9 -12   3   12.68    3.73
   9  12  -3   18.88    4.17
   9  12  -3   23.01    5.76
  -9 -13   3  194.29   21.96
  -9 -13   3  200.62   22.51
  -8  14   3   24.37    6.71
  -8  14   3   10.20    5.73
   8 -14  -3   19.76    4.07
   8 -14  -3   15.69    3.63
  -8  13   3   25.39    6.54
  -8  13   3   19.15    5.86
   8 -13  -3   21.96    4.37
   8 -13  -3   19.73    4.03
  -8  12   3  291.09   32.78
  -8  12   3  231.91   26.54
   8 -12  -3  273.33   30.54
   8 -12  -3  270.65   30.23
  -8  11   3   68.70    9.86
  -8  11   3   84.94   11.02
   8 -11  -3   79.59    9.69
   8 -11  -3   81.11    9.80
  -8  10   3   71.82    9.83
  -8  10   3   73.89    9.93
   8 -10  -3   65.01    8.13
   8 -10  -3   77.25    9.59
  -8   9   3 3134.26  344.71
  -8   9   3 3256.96  358.27
   8  -9  -3 3252.90  357.59
   8  -9  -3 3040.04  334.34
  -8   8   3  389.79   43.62
  -8   8   3  359.63   40.27
   8  -8  -3  376.23   41.83
   8  -8  -3  330.98   36.88
  -8   7   3  149.21   17.49
  -8   7   3  137.99   16.24
  -8   6   3 1023.63  112.97
  -8   6   3 1098.53  121.41
   8  -6  -3 1006.34  111.01
   8  -6  -3 1135.14  125.14
  -8   5   3 1357.15  149.82
  -8   5   3 1378.85  151.88
   8  -5  -3 1270.72  140.09
   8  -5  -3 1396.13  153.75
  -8   4   3    8.74    3.97
  -8   4   3    8.13    4.64
   8  -4  -3   10.37    3.66
   8  -4  -3    7.22    3.56
  -8   3   3 3833.51  421.65
  -8   3   3 2671.60  293.90
   8  -3  -3 2858.36  314.41
   8  -3  -3 3514.90  386.40
  -8   2   3  976.51  107.72
  -8   2   3  952.79  105.14
   8  -2  -3  929.06  102.50
   8  -2  -3  873.47   96.40
  -8   1   3 1178.19  129.92
  -8   1   3 1170.73  129.00
   8  -1  -3  928.72  102.53
   8  -1  -3 1008.03  111.14
  -8   0   3    2.34    3.97
  -8   0   3    4.58    3.36
   8   0  -3    0.88    3.63
   8   0  -3   -1.29    2.68
  -8  -1   3  897.54   99.04
  -8  -1   3  596.55   66.03
   8   1  -3  727.05   80.47
   8   1  -3  770.77   85.08
  -8  -2   3  572.49   63.45
  -8  -2   3  522.32   57.96
   8   2  -3  701.96   77.62
   8   2  -3  664.68   73.62
  -8  -3   3 2126.23  234.01
  -8  -3   3 2267.57  249.60
   8   3  -3 2207.58  243.03
   8   3  -3 2496.70  274.65
  -8  -4   3    5.19    3.25
  -8  -4   3    8.98    3.76
   8   4  -3    1.66    3.73
   8   4  -3    3.02    2.88
  -8  -5   3  964.31  106.33
  -8  -5   3  890.42   98.40
   8   5  -3  908.38  100.16
   8   5  -3  910.08  100.57
  -8  -6   3  790.09   87.35
  -8  -6   3  720.61   79.52
   8   6  -3  562.66   62.50
   8   6  -3  717.89   79.28
  -8  -7   3  105.89   12.34
  -8  -7   3  106.16   12.74
   8   7  -3  114.97   13.29
   8   7  -3  102.40   12.54
  -8  -8   3  267.67   30.17
  -8  -8   3  290.28   32.44
   8   8  -3  237.20   27.01
   8   8  -3  285.60   31.90
  -8  -9   3 2161.14  237.81
  -8  -9   3 2545.51  280.01
   8   9  -3 2627.19  288.89
   8   9  -3 2042.85  224.96
  -8 -10   3   67.08    8.58
  -8 -10   3   68.91    8.58
   8  10  -3   55.08    7.32
   8  10  -3   59.69    8.74
  -8 -11   3   76.47    9.63
  -8 -11   3   75.11    9.12
   8  11  -3   73.42   10.00
   8  11  -3   73.01    9.15
  -8 -12   3  223.16   24.98
  -8 -12   3  219.20   24.74
  -8 -13   3   19.76    4.17
  -8 -13   3   20.98    3.80
   8  13  -3   22.71    4.37
   8  13  -3   15.22    5.36
  -8 -14   3   19.56    3.73
  -8 -14   3   16.71    3.90
   8  14  -3   36.47    6.58
   8  14  -3   24.78    4.34
  -7  15   3  131.11   16.20
  -7  15   3  104.23   13.42
   7 -15  -3  113.72   13.22
   7 -15  -3  114.09   13.08
  -7  14   3    9.59    6.00
  -7  14   3    8.81    5.52
   7 -14  -3   15.29    3.69
   7 -14  -3    9.39    3.83
  -7  13   3  226.05   26.17
  -7  13   3  178.76   20.95
   7 -13  -3  187.88   21.25
   7 -13  -3  198.62   22.57
  -7  12   3 1527.98  168.46
  -7  12   3 1115.14  123.07
   7 -12  -3 1251.74  137.85
   7 -12  -3 1097.86  120.94
  -7  11   3  324.37   36.30
  -7  11   3  372.84   41.83
   7 -11  -3  329.97   36.67
   7 -11  -3  340.64   37.89
  -7  10   3 2111.99  232.52
  -7  10   3 1659.50  182.83
   7 -10  -3 1769.99  194.79
   7 -10  -3 1576.45  173.51
  -7   9   3  686.71   76.03
   7  -9  -3  571.47   63.18
   7  -9  -3  609.43   67.35
  -7   8   3 2275.70  250.48
  -7   8   3 2135.04  235.06
   7  -8  -3 1901.50  209.23
   7  -8  -3 2097.08  230.76
  -7   7   3  995.15  109.85
  -7   7   3 1128.70  124.56
   7  -7  -3  995.83  109.75
   7  -7  -3  971.43  107.11
  -7   6   3 1319.87  145.58
  -7   6   3 1152.09  127.11
   7  -6  -3 1245.98  137.27
   7  -6  -3 1260.89  138.87
  -7   5   3   57.42    7.93
  -7   5   3   49.52    6.81
   7  -5  -3   55.72    7.25
   7  -5  -3   53.15    6.78
  -7   4   3  819.58   90.47
  -7   4   3  726.03   80.26
   7  -4  -3  838.56   92.53
   7  -4  -3  752.47   83.01
  -7   3   3    4.81    2.98
  -7   3   3   -1.25    4.07
   7  -3  -3    1.73    3.15
   7  -3  -3    4.07    3.49
  -7   2   3 5097.80  560.28
  -7   2   3 5419.80  595.53
   7  -2  -3 4213.14  463.34
   7  -2  -3 5426.58  596.55
   7  -1  -3  939.57  103.62
   7  -1  -3  629.77   69.65
  -7   0   3    0.51    3.69
  -7   0   3    4.54    3.69
   7   0  -3    4.27    3.25
   7   0  -3    2.03    3.22
  -7  -1   3  480.97   53.35
  -7  -1   3  511.47   56.67
   7   1  -3  597.91   66.26
   7   1  -3  501.31   55.49
  -7  -2   3 4585.98  504.36
  -7  -2   3 4138.57  455.21
   7   2  -3 4002.99  440.29
   7   2  -3 4375.83  481.31
  -7  -3   3    9.52    3.69
  -7  -3   3    3.66    4.10
   7   3  -3    2.44    2.95
   7   3  -3   11.76    4.24
  -7  -4   3  461.65   51.28
  -7  -4   3  678.24   74.91
   7   4  -3  571.13   63.32
   7   4  -3  657.22   72.57
  -7  -5   3   37.96    5.46
  -7  -5   3   47.52    7.19
   7   5  -3   42.50    6.41
   7   5  -3   37.05    5.42
  -7  -6   3  995.15  109.72
  -7  -6   3  954.82  105.38
   7   6  -3  889.40   98.26
   7   6  -3  976.51  107.62
  -7  -7   3  755.86   83.58
  -7  -7   3  787.38   86.91
   7   7  -3  850.42   93.75
   7   7  -3  641.63   71.15
  -7  -8   3 1633.40  179.95
  -7  -8   3 1670.00  183.85
   7   8  -3 1655.77  182.22
   7   8  -3 1488.66  164.12
  -7  -9   3  604.69   66.91
  -7  -9   3  529.10   58.71
   7   9  -3  511.81   56.67
   7   9  -3  505.37   56.30
  -7 -10   3 1676.10  184.49
  -7 -10   3 1313.09  144.66
   7  10  -3 1696.10  186.66
   7  10  -3 1459.52  160.97
  -7 -11   3  308.82   34.37
  -7 -11   3  305.73   34.17
   7  11  -3  302.27   34.10
   7  11  -3  329.76   36.74
  -7 -12   3 1099.55  121.17
  -7 -12   3 1163.27  128.22
   7  12  -3 1197.85  132.29
   7  12  -3 1485.28  163.51
  -7 -13   3  182.96   20.85
  -7 -13   3  195.68   22.00
   7  13  -3  209.84   24.17
   7  13  -3  254.35   28.44
  -7 -14   3   15.80    3.36
  -7 -14   3   11.66    3.93
   7  14  -3   15.15    5.49
   7  14  -3    9.29    3.83
  -7 -15   3  134.66   15.42
  -7 -15   3  130.26   14.74
   7  15  -3  138.33   16.24
   7  15  -3  179.98   20.34
  -6  16   3 1484.94  163.75
  -6  16   3 1249.71  137.85
   6 -16  -3 1409.01  155.04
   6 -16  -3 1434.43  157.81
  -6  15   3  606.72   67.38
  -6  15   3  514.19   57.18
   6 -15  -3  632.14   69.76
   6 -15  -3  632.82   69.86
  -6  14   3   61.52    9.25
  -6  14   3   65.32    9.35
   6 -14  -3   64.87    8.44
   6 -14  -3   60.43    7.56
  -6  13   3  943.97  104.33
  -6  13   3  743.65   82.36
  -6  12   3  351.83   39.45
  -6  12   3  257.91   29.12
   6 -12  -3  306.72   34.20
   6 -12  -3  207.20   23.22
  -6  11   3  581.98   64.64
  -6  11   3  493.51   55.01
   6 -11  -3  517.58   57.21
   6 -11  -3  518.93   57.38
  -6  10   3 1617.13  178.19
  -6  10   3 1325.63  146.12
   6 -10  -3 1402.57  154.39
   6 -10  -3 1397.83  153.88
  -6   9   3 1317.50  145.31
  -6   9   3 1131.41  124.80
   6  -9  -3 1211.07  133.38
   6  -9  -3 1089.72  120.06
  -6   8   3  800.94   88.57
   6  -8  -3  720.94   79.55
   6  -8  -3  723.32   79.82
  -6   7   3  447.41   49.69
  -6   7   3  416.91   46.37
   6  -7  -3  403.01   44.64
   6  -7  -3  419.62   46.50
  -6   6   3   34.27    5.36
  -6   6   3   46.23    7.08
   6  -6  -3   35.86    5.22
   6  -6  -3   35.62    4.98
  -6   5   3  740.60   81.89
  -6   5   3  523.68   58.03
   6  -5  -3  589.77   65.21
   6  -5  -3  505.37   55.82
  -6   4   3  637.56   70.47
  -6   4   3  798.56   88.23
   6  -4  -3  788.40   86.97
   6  -4  -3  730.44   80.60
  -6   3   3   47.01    6.20
  -6   3   3   46.33    6.54
   6  -3  -3   46.44    6.03
   6  -3  -3   53.76    6.81
  -6   2   3 2158.43  237.43
  -6   2   3 1778.13  195.74
   6  -2  -3 2107.59  231.84
   6  -2  -3 2176.39  239.40
   6  -1  -3  390.13   43.22
   6  -1  -3  469.11   51.86
  -6   0   3    2.24    3.05
  -6   0   3    4.47    2.64
   6   0  -3    0.64    2.61
   6   0  -3    3.39    2.68
  -6  -1   3  385.72   42.88
  -6  -1   3  385.05   42.78
   6   1  -3  357.59   39.72
   6   1  -3  414.53   45.89
  -6  -2   3 2117.75  233.03
  -6  -2   3 2540.42  279.50
   6   2  -3 1744.57  192.01
   6   2  -3 2107.92  231.84
  -6  -3   3   38.81    5.63
  -6  -3   3   40.61    5.73
   6   3  -3   51.38    6.81
   6   3  -3   42.00    5.56
  -6  -4   3  670.10   73.99
  -6  -4   3  739.59   81.75
   6   4  -3  579.60   64.03
   6   4  -3  560.28   62.06
  -6  -5   3  463.34   51.42
  -6  -5   3  466.39   51.69
   6   5  -3  469.44   51.93
   6   5  -3  403.35   44.91
  -6  -6   3   31.90    5.63
  -6  -6   3   37.45    5.39
   6   6  -3   35.28    6.03
   6   6  -3   32.57    5.02
  -6  -7   3  363.35   40.50
  -6  -7   3  328.92   36.81
   6   7  -3  324.07   36.40
   6   7  -3  399.62   44.33
  -6  -8   3  660.61   73.08
  -6  -8   3  711.12   78.67
   6   8  -3  768.74   84.84
   6   8  -3  675.86   75.01
  -6  -9   3 1062.61  117.24
  -6  -9   3 1040.91  114.70
   6   9  -3 1261.91  139.24
   6   9  -3 1153.44  127.04
  -6 -10   3 1332.41  146.87
  -6 -10   3 1463.92  161.17
   6  10  -3 1430.37  157.48
   6  10  -3 1486.29  163.92
  -6 -11   3  532.83   58.94
  -6 -11   3  493.85   54.84
   6  11  -3  503.68   56.16
   6  11  -3  565.37   62.50
  -6 -12   3  320.24   35.76
  -6 -12   3  300.41   33.52
   6  12  -3  337.49   37.52
   6  12  -3  319.29   36.03
  -6 -13   3  847.37   93.52
  -6 -13   3  760.60   83.89
   6  13  -3  830.76   92.13
   6  13  -3  795.51   87.75
  -6 -14   3   65.38    8.13
  -6 -14   3   74.30    9.39
   6  14  -3   57.18    7.52
   6  14  -3   68.03    9.49
  -6 -15   3  751.45   82.97
  -6 -15   3  749.76   82.70
   6  15  -3  756.53   83.79
   6  15  -3  762.30   84.09
  -6 -16   3 1594.42  175.37
  -6 -16   3 1541.54  169.64
   6  16  -3 1757.79  193.61
   6  16  -3 1668.99  183.61
  -5  16   3   23.39    6.13
  -5  16   3   27.93    7.69
   5 -16  -3   20.44    4.44
   5 -16  -3   33.12    4.81
  -5  15   3  171.27   20.51
  -5  15   3  143.44   17.18
   5 -15  -3  157.07   17.93
   5 -15  -3  147.14   16.64
  -5  14   3   36.91    8.37
  -5  14   3   26.10    6.00
   5 -14  -3   31.52    4.71
   5 -14  -3   30.37    5.59
  -5  13   3   16.74    5.02
  -5  13   3   19.90    7.08
   5 -13  -3   11.66    4.10
   5 -13  -3   15.63    3.42
  -5  12   3  566.38   63.04
  -5  12   3  465.38   51.89
  -5  11   3   59.04    9.15
  -5  11   3   58.13    8.27
   5 -11  -3   55.59    6.88
   5 -11  -3   56.84    7.46
  -5  10   3  484.36   53.99
  -5  10   3  348.78   39.05
   5 -10  -3  415.55   46.06
   5 -10  -3  411.15   45.59
  -5   9   3 4328.38  476.22
  -5   9   3 3640.31  400.64
   5  -9  -3 4223.31  464.36
   5  -9  -3 3864.02  424.70
  -5   8   3  647.05   71.59
  -5   8   3  556.55   61.69
   5  -8  -3  529.78   58.50
   5  -8  -3  627.73   69.28
  -5   7   3  137.99   16.07
  -5   7   3  172.63   19.86
   5  -7  -3  119.38   13.63
   5  -7  -3  129.85   14.78
  -5   6   3  950.41  104.80
  -5   6   3  975.83  107.58
   5  -6  -3  917.87  101.07
   5  -6  -3  948.72  104.53
  -5   5   3 2049.29  225.50
  -5   5   3 2168.94  238.65
   5  -5  -3 1649.67  181.51
   5  -5  -3 1851.34  203.67
   5  -4  -3   19.90    3.53
   5  -4  -3   16.13    2.81
  -5   3   3 3901.30  428.77
  -5   3   3 3887.75  427.41
   5  -3  -3 3467.45  381.32
   5  -3  -3 3305.43  363.35
  -5   2   3   24.23    3.53
  -5   2   3   39.45    5.29
   5  -2  -3   38.44    4.78
   5  -2  -3   47.25    5.83
  -5   1   3 1302.24  143.34
  -5   1   3 1709.32  188.08
   5  -1  -3 1215.13  133.75
   5  -1  -3 1325.97  145.92
   5   0  -3   -0.20    1.76
   5   0  -3    2.27    2.07
  -5  -1   3 1293.09  142.36
  -5  -1   3 1637.46  180.25
   5   1  -3 1271.06  139.92
   5   1  -3 1312.41  144.43
  -5  -2   3   49.55    6.34
  -5  -2   3   46.00    6.00
   5   2  -3   49.08    6.03
   5   2  -3   50.03    6.37
  -5  -3   3 3357.97  369.12
  -5  -3   3 3531.85  388.44
   5   3  -3 3254.93  357.93
   5   3  -3 3088.50  339.63
  -5  -4   3   14.64    3.29
  -5  -4   3   12.34    3.49
   5   4  -3   16.91    2.98
   5   4  -3   17.12    3.90
  -5  -5   3 1388.67  152.97
  -5  -5   3 1573.74  173.27
   5   5  -3 1361.90  150.12
   5   5  -3 1588.32  174.76
  -5  -6   3  788.73   87.11
  -5  -6   3  778.57   85.96
   5   6  -3  725.01   80.23
   5   6  -3  867.03   95.58
  -5  -7   3  113.01   13.19
  -5  -7   3  116.33   13.73
   5   7  -3  108.36   13.15
   5   7  -3  131.78   15.12
  -5  -8   3  494.53   54.94
  -5  -8   3  565.71   62.60
  -5  -9   3 3687.77  405.38
  -5  -9   3 4131.79  454.53
   5   9  -3 3677.60  404.37
   5   9  -3 3701.32  407.08
  -5 -10   3  511.81   56.81
  -5 -10   3  371.15   41.18
   5  10  -3  339.29   38.23
   5  10  -3  442.67   49.01
  -5 -11   3   47.15    6.41
  -5 -11   3   64.74    8.58
   5  11  -3   97.62   11.63
   5  11  -3   66.57    9.29
  -5 -12   3  392.50   43.62
  -5 -12   3  521.98   57.82
  -5 -13   3   18.98    4.44
  -5 -13   3   15.25    3.29
   5  13  -3   16.64    5.42
   5  13  -3   23.93    4.58
  -5 -14   3   27.52    5.12
  -5 -14   3   37.83    5.42
   5  14  -3   33.86    6.41
   5  14  -3   35.83    5.66
  -5 -15   3  165.07   18.81
  -5 -15   3  157.54   17.83
   5  15  -3  179.07   20.47
   5  15  -3  182.73   21.35
  -5 -16   3   33.28    5.49
  -5 -16   3   33.39    4.81
   5  16  -3   34.30    5.46
   5  16  -3   37.05    7.02
  -5 -17   3  256.25   28.47
   5  17  -3  328.88   36.50
  -4  17   3  676.20   75.15
  -4  17   3  717.56   79.55
   4 -17  -3  791.45   87.21
   4 -17  -3  701.29   77.31
   4 -16  -3 1484.60  163.37
   4 -16  -3 1407.99  154.97
  -4  15   3  210.45   24.57
  -4  15   3  183.61   21.52
   4 -15  -3  197.40   22.17
   4 -15  -3  200.76   22.61
  -4  14   3   83.01   12.07
  -4  14   3   71.99    9.83
   4 -14  -3   77.82    9.73
   4 -14  -3   81.79    9.69
   4 -13  -3  242.35   27.01
   4 -13  -3  256.99   28.81
  -4  12   3  850.08   93.96
  -4  12   3 1072.77  118.70
   4 -12  -3  900.93   99.24
   4 -12  -3  962.95  106.16
   4 -11  -3  267.13   29.83
   4 -11  -3  229.33   25.56
   4 -10  -3 1837.78  202.18
   4 -10  -3 1990.99  219.03
  -4   9   3 1404.94  154.80
  -4   9   3 1816.77  200.18
   4  -9  -3 1474.09  162.25
   4  -9  -3 1495.78  164.59
   4  -8  -3 1290.04  141.99
   4  -8  -3 1350.37  148.60
  -4   7   3  673.83   74.43
  -4   7   3  951.43  104.94
   4  -7  -3  798.90   88.03
   4  -7  -3  813.82   89.65
  -4   6   3 3384.41  372.17
  -4   6   3 4484.30  493.17
   4  -6  -3 3748.78  412.16
   4  -6  -3 4413.12  485.04
  -4   5   3   52.10    6.68
  -4   5   3   54.54    6.61
   4  -5  -3   56.64    6.75
   4  -5  -3   56.10    6.64
  -4   4   3  471.82   52.06
  -4   4   3  451.48   49.86
   4  -4  -3  410.81   45.35
   4  -4  -3  484.02   53.35
  -4   2   3 4687.67  515.20
  -4   1   3  744.33   82.03
  -4   1   3  940.24  103.55
   4  -1  -3  752.47   82.84
   4  -1  -3  699.93   77.04
  -4   0   3    2.34    2.30
  -4   0   3    2.88    2.07
   4   0  -3    5.02    1.63
   4   0  -3    1.12    1.36
  -4  -1   3  849.07   93.48
  -4  -1   3 1125.31  123.95
   4   1  -3  919.23  101.14
   4   1  -3  733.49   80.81
  -4  -3   3  262.52   29.22
  -4  -3   3  338.47   37.59
   4   3  -3  249.91   27.90
   4   3  -3  311.19   34.47
  -4  -4   3  450.12   49.86
  -4  -4   3  361.66   40.17
   4   4  -3  451.82   49.93
   4   4  -3  359.63   39.96
  -4  -5   3   49.15    6.44
  -4  -5   3   46.10    6.07
   4   5  -3   48.13    6.47
   4   5  -3   61.49    7.42
  -4  -6   3 3186.80  350.47
  -4  -6   3 3813.18  419.28
   4   6  -3 4175.85  459.28
   4   6  -3 3198.32  351.83
  -4  -7   3  732.47   80.87
  -4  -7   3  686.71   75.86
   4   7  -3  741.96   82.16
   4   7  -3  807.04   88.97
  -4  -8   3 1301.90  143.34
  -4  -8   3 1365.97  150.49
   4   8  -3 1213.78  133.95
   4   8  -3 1316.82  144.97
  -4  -9   3 1614.41  177.85
  -4  -9   3 1472.73  162.15
   4   9  -3 1453.41  160.29
   4   9  -3 1545.95  170.15
  -4 -10   3 1791.35  197.23
  -4 -10   3 1774.06  195.23
   4  10  -3 1941.50  213.61
   4  10  -3 1816.43  200.22
  -4 -11   3  290.41   32.57
  -4 -11   3  229.03   25.69
   4  11  -3  261.43   29.83
   4  11  -3  265.94   29.76
  -4 -12   3 1130.40  124.56
  -4 -12   3  976.51  107.79
  -4 -13   3  294.48   32.91
  -4 -13   3  234.79   26.23
   4  13  -3  267.53   30.40
   4  13  -3  257.94   28.91
  -4 -14   3   82.87    9.86
  -4 -14   3   81.25   10.07
   4  14  -3   98.70   12.74
   4  14  -3   81.48   10.17
  -4 -15   3  207.78   23.25
  -4 -15   3  267.13   29.96
   4  15  -3  235.64   26.57
   4  15  -3  225.44   26.03
  -4 -16   3 1607.64  176.86
  -4 -16   3 1683.90  185.37
   4  16  -3 1745.59  192.12
   4  16  -3 1687.97  186.18
  -4 -17   3  843.64   93.01
  -4 -17   3  783.31   86.40
   4  17  -3  850.76   93.86
   4  17  -3 1070.40  118.26
  -3  17   3   84.77   11.32
  -3  17   3  102.97   13.83
   3 -17  -3  109.34   12.58
   3 -17  -3   96.16   11.32
  -3  16   3 2408.91  265.16
  -3  16   3 3090.88  340.30
   3 -16  -3 3053.59  335.76
   3 -16  -3 3195.95  351.49
  -3  15   3  564.35   62.71
  -3  15   3  530.12   59.28
   3 -15  -3  520.63   57.59
   3 -15  -3  531.13   58.74
   3 -14  -3  113.04   12.98
   3 -14  -3   99.28   11.69
  -3  13   3 1115.14  123.04
  -3  13   3 1557.13  171.92
   3 -13  -3 1529.68  168.32
   3 -13  -3 1671.02  183.88
   3 -12  -3 1291.40  142.19
   3 -12  -3 1292.07  142.22
  -3  11   3  198.96   22.88
  -3  11   3  296.95   33.76
   3 -11  -3  292.61   32.51
   3 -11  -3  283.53   31.59
  -3  10   3 1756.77  193.68
  -3  10   3 1313.09  144.77
   3 -10  -3 1846.93  203.17
   3 -10  -3 1778.47  195.64
   3  -9  -3  675.19   74.43
   3  -9  -3  617.57   68.09
   3  -8  -3 1606.96  176.80
   3  -8  -3 1775.75  195.27
   3  -7  -3   40.81    5.15
   3  -7  -3   28.00    3.86
   3  -5  -3  673.49   74.20
   3  -5  -3  791.11   87.08
   3  -4  -3 1222.93  134.53
   3  -4  -3 1771.35  194.83
  -3   3   3   37.01    4.41
  -3   3   3   33.15    4.00
   3  -3  -3   46.81    5.32
   3  -3  -3   34.20    3.93
  -3   2   3 3453.89  380.30
  -3   2   3 2560.42  281.94
   3  -1  -3  696.88   76.70
   3  -1  -3  827.71   91.11
  -3   0   3    1.76    1.36
  -3   0   3    1.59    1.42
   3   0  -3    0.75    0.98
   3   0  -3    1.08    1.02
  -3  -1   3  826.70   91.04
  -3  -1   3 1236.15  136.02
   3   1  -3 1119.89  123.17
   3   1  -3  806.36   88.77
  -3  -2   3 1948.96  214.32
  -3  -2   3 2882.76  316.95
   3   2  -3 1899.81  208.93
  -3  -3   3   45.18    5.59
  -3  -3   3   34.57    4.64
   3   3  -3   57.62    6.95
   3   3  -3   50.50    6.10
  -3  -4   3 1077.86  118.73
  -3  -4   3 1501.21  165.20
   3   4  -3 1202.25  132.46
   3   4  -3 1637.80  180.19
  -3  -5   3  627.39   69.28
  -3  -5   3  512.83   56.71
   3   5  -3  532.83   59.01
   3   5  -3  790.43   87.08
  -3  -6   3  385.39   42.78
  -3  -6   3  285.19   31.83
   3   6  -3  381.66   42.23
   3   6  -3  290.75   32.61
  -3  -7   3   23.52    4.14
  -3  -7   3   22.88    3.86
   3   7  -3   22.10    4.88
   3   7  -3   21.18    3.86
  -3  -8   3 1723.22  189.64
  -3  -8   3 1390.71  153.21
   3   8  -3 1565.95  172.36
   3   8  -3 1523.58  167.95
  -3  -9   3  630.11   69.62
  -3  -9   3  794.84   87.79
   3   9  -3  455.21   50.81
   3   9  -3  640.61   70.77
   3  10  -3 1637.12  180.52
   3  10  -3 2029.63  223.30
  -3 -11   3  270.45   30.23
  -3 -11   3  304.51   34.10
   3  11  -3  246.01   28.13
   3  11  -3  313.83   35.01
  -3 -12   3 1248.01  137.55
  -3 -12   3 1336.82  147.21
   3  12  -3 1286.31  142.05
   3  12  -3 1424.94  156.90
  -3 -13   3 1544.25  170.05
  -3 -13   3 1253.10  137.99
   3  13  -3 1704.58  187.57
   3  13  -3 1522.22  168.02
  -3 -14   3  100.02   12.10
  -3 -14   3   93.86   11.02
   3  14  -3   88.43   12.03
   3  14  -3   95.89   11.42
  -3 -15   3  579.26   64.13
  -3 -15   3  557.91   61.65
   3  15  -3  597.57   66.13
   3  15  -3  543.34   60.74
   3  16  -3 3247.13  356.91
   3  16  -3 3136.30  345.39
  -3 -17   3  118.26   13.83
  -3 -17   3  115.89   13.42
   3  17  -3  116.36   14.57
   3  17  -3  101.89   12.20
  -2  17   3  525.03   58.81
  -2  17   3  368.78   41.32
   2 -17  -3  427.75   47.35
   2 -17  -3  464.70   51.38
  -2  16   3   28.98    8.10
  -2  16   3   10.58    5.73
   2 -16  -3    4.54    3.22
   2 -16  -3   -0.27    3.42
  -2  15   3  290.48   32.78
  -2  15   3  354.20   40.17
   2 -15  -3  420.64   46.57
   2 -15  -3  332.00   36.91
  -2  14   3   85.28   12.41
  -2  14   3   62.84    9.08
   2 -14  -3   75.76    8.98
   2 -14  -3   71.31    8.78
  -2  13   3   52.03    7.66
  -2  13   3   83.72   11.46
   2 -13  -3   70.03    8.47
   2 -13  -3   73.48    8.85
   2 -12  -3  610.79   67.45
   2 -12  -3  643.66   71.01
  -2  11   3   46.13    6.81
  -2  11   3   42.78    7.66
   2 -11  -3   53.08    6.68
   2 -11  -3   46.54    5.83
  -2  10   3 1090.74  120.26
  -2  10   3 1368.00  150.97
   2 -10  -3 1151.41  126.70
   2 -10  -3 1075.82  118.46
   2  -9  -3 2793.96  307.22
   2  -9  -3 3354.92  368.78
   2  -8  -3  452.16   49.86
   2  -8  -3  373.86   41.35
  -2   7   3    6.27    3.46
  -2   7   3    2.17    3.02
   2  -7  -3    6.44    1.97
   2  -7  -3    7.22    1.97
   2  -6  -3  543.34   59.82
   2  -6  -3  426.40   47.05
   2  -5  -3 2141.14  235.43
   2  -5  -3 2853.27  313.63
  -2   4   3    4.34    1.56
  -2   4   3    2.44    1.86
   2  -4  -3    3.63    1.12
   2  -4  -3    3.97    1.12
  -2   3   3 2831.92  312.04
  -2   0   3    3.22    1.08
  -2   0   3    2.81    1.12
   2   0  -3    2.47    1.05
   2   0  -3    2.75    0.92
  -2  -1   3 1128.02  124.09
   2   1  -3 1114.46  122.56
   2   1  -3  871.44   95.92
   2   2  -3 1613.74  177.44
   2   2  -3 1314.11  144.56
  -2  -4   3   -0.47    2.27
  -2  -4   3    3.46    2.24
   2   4  -3    4.10    2.34
   2   4  -3    3.32    2.10
   2   7  -3    4.17    3.53
   2   7  -3    9.12    3.02
  -2  -8   3  437.24   48.50
  -2  -8   3  454.19   50.44
  -2  -9   3 3007.50  330.71
  -2  -9   3 2636.69  290.07
   2   9  -3 2263.84  249.33
   2   9  -3 2898.35  318.71
  -2 -10   3 1198.19  132.12
  -2 -10   3 1148.02  126.50
   2  10  -3  836.87   92.70
   2  10  -3 1041.25  114.70
  -2 -11   3   48.77    6.27
  -2 -11   3   71.69    9.35
   2  11  -3   47.45    7.39
   2  11  -3   60.77    7.69
  -2 -12   3  658.24   72.60
  -2 -12   3  785.01   86.77
   2  12  -3  674.85   74.53
   2  12  -3  559.61   62.47
  -2 -13   3   75.42    9.86
  -2 -13   3   68.50    8.24
   2  13  -3   73.31    9.39
   2  13  -3   62.43    9.56
  -2 -14   3   77.75    9.42
  -2 -14   3   79.65   10.03
   2  14  -3   71.89   10.81
   2  14  -3   77.92    9.73
  -2 -15   3  358.61   39.89
  -2 -15   3  412.50   45.69
   2  15  -3  328.85   37.28
   2  15  -3  371.83   41.35
  -2 -16   3    5.80    4.24
  -2 -16   3    9.46    2.88
   2  16  -3   12.27    6.68
   2  16  -3    9.90    4.68
  -2 -17   3  474.87   52.64
  -2 -17   3  516.56   57.11
   2  17  -3  438.60   49.15
   2  17  -3  522.66   57.82
  -1  17   3  715.86   79.59
  -1  17   3  582.65   64.57
   1 -17  -3  657.56   72.54
   1 -17  -3  798.56   88.06
  -1  16   3  548.42   61.32
  -1  16   3  374.88   41.89
   1 -16  -3  437.58   48.44
   1 -16  -3  462.67   51.18
  -1  15   3  121.65   15.52
  -1  15   3  111.58   13.49
   1 -15  -3  127.31   14.64
   1 -15  -3  150.93   17.12
  -1  14   3   85.89   12.64
  -1  14   3   68.37    9.29
   1 -14  -3   84.53   10.17
   1 -14  -3   86.06   10.07
  -1  13   3  236.42   27.42
  -1  13   3  199.71   22.78
   1 -13  -3  242.82   27.08
   1 -13  -3  237.03   26.47
  -1  12   3 1023.29  113.38
  -1  12   3  932.45  103.07
   1 -12  -3  849.75   93.72
   1 -12  -3  859.91   94.77
  -1  11   3   38.78    7.90
  -1  11   3   28.64    5.39
   1 -11  -3   31.05    4.27
   1 -11  -3   48.06    6.17
  -1  10   3 1146.33  126.36
  -1  10   3 1442.91  159.17
  -1   9   3 1817.45  200.12
  -1   9   3 2743.45  301.97
   1  -9  -3 2093.01  230.18
   1  -9  -3 1795.75  197.54
  -1   8   3  655.19   72.43
  -1   8   3  904.66   99.96
   1  -8  -3  729.76   80.40
   1  -8  -3  627.39   69.18
  -1   7   3  158.90   18.03
  -1   7   3  198.29   22.47
   1  -7  -3  187.57   20.88
   1  -7  -3  162.49   18.17
  -1   6   3 4402.95  484.02
  -1   6   3 3667.43  403.01
   1  -6  -3 3592.86  394.88
   1  -6  -3 3361.02  369.45
  -1   5   3  249.06   27.66
  -1   5   3  242.79   27.08
   1  -5  -3  252.18   27.86
   1  -5  -3  239.16   26.47
  -1   4   3  351.83   38.88
  -1   4   3  339.29   37.52
   1  -4  -3  312.78   34.51
   1  -4  -3  309.19   34.10
  -1   3   3 1054.47  116.02
  -1   3   3 1507.98  165.88
   1  -3  -3 1432.40  157.54
   1  -3  -3 1193.10  131.24
  -1   0   3    2.85    1.53
  -1   0   3    1.86    1.42
  -1  -1   3  394.54   43.55
  -1  -1   3  292.17   32.34
   1   1  -3  308.10   34.10
   1   1  -3  331.97   36.57
  -1  -3   3 1882.86  207.10
  -1  -3   3 1463.24  161.00
   1   3  -3 1860.49  204.56
   1   3  -3 1365.97  150.39
  -1  -4   3  312.24   34.67
  -1  -4   3  432.16   47.83
   1   4  -3  302.44   33.73
   1   4  -3  400.64   44.23
   1   5  -3  303.22   33.62
   1   5  -3  213.33   24.03
  -1  -6   3 4030.11  443.01
  -1  -6   3 2774.64  305.16
   1   6  -3 4064.00  446.73
   1   6  -3 2688.54  295.83
  -1  -7   3  153.58   17.52
  -1  -7   3  209.78   23.56
   1   7  -3  145.31   16.95
   1   7  -3  213.40   23.86
   1   8  -3  757.55   83.52
   1   8  -3  579.60   64.43
  -1  -9   3 1996.07  219.74
  -1  -9   3 2046.91  225.20
   1   9  -3 1547.30  170.66
   1   9  -3 2224.86  244.72
  -1 -11   3   37.96    5.32
  -1 -11   3   43.86    6.81
   1  11  -3   27.08    5.97
   1  11  -3   38.06    5.52
   1  12  -3  662.65   73.79
   1  12  -3  819.58   90.43
  -1 -13   3  267.06   29.83
  -1 -13   3  248.89   28.06
   1  13  -3  246.82   27.69
   1  13  -3  213.30   24.95
  -1 -14   3   88.43   10.41
  -1 -14   3   99.62   12.00
   1  14  -3   73.31   10.41
   1  14  -3   88.30   10.81
  -1 -15   3  133.21   15.56
  -1 -15   3  147.07   16.74
   1  15  -3  108.09   13.73
   1  15  -3  142.22   16.54
  -1 -16   3  483.00   53.42
  -1 -16   3  449.11   49.86
   1  16  -3  537.57   59.52
   1  16  -3  429.79   48.27
  -1 -17   3  710.44   78.37
  -1 -17   3  618.24   68.30
   1  17  -3  767.04   84.60
   1  17  -3  659.60   73.38
   0  17   3    2.51    7.39
   0  17   3    5.02    4.37
   0 -17  -3    1.15    2.98
   0 -17  -3    0.47    3.22
   0  16   3 3109.86  342.00
   0  16   3 3789.45  417.25
   0 -16  -3 3487.79  383.35
   0 -16  -3 3358.99  369.45
   0  15   3   99.58   12.17
   0  15   3  103.18   13.96
   0 -15  -3  103.14   11.90
   0 -15  -3  114.46   13.29
   0  14   3   20.13    6.68
   0  14   3   21.12    4.78
   0  13   3 1010.75  111.89
   0  13   3  920.92  101.68
   0 -13  -3 1056.84  116.36
   0 -13  -3 1081.25  119.14
   0  12   3 1485.61  163.71
   0  12   3 1583.23  174.76
   0 -12  -3 1876.42  206.49
   0 -12  -3 1722.54  189.47
   0  11   3   45.35    6.75
   0  11   3   60.91    9.12
   0 -11  -3   53.18    6.61
   0 -11  -3   52.98    6.47
   0  10   3 1601.20  176.36
   0  10   3 1605.94  177.20
   0 -10  -3 1481.21  162.97
   0 -10  -3 1526.97  168.05
   0   9   3   45.66    7.63
   0   9   3   41.39    6.20
   0  -9  -3   44.61    5.76
   0  -9  -3   38.88    5.22
   0   8   3 1091.42  120.56
   0   8   3 1296.14  142.87
   0  -8  -3 1734.74  190.86
   0  -8  -3 1757.79  193.34
   0   7   3  190.73   21.42
   0   7   3  164.93   18.95
   0  -7  -3  170.25   19.02
   0  -7  -3  197.51   22.07
   0   6   3   72.06    8.54
   0   6   3   50.64    6.71
   0  -6  -3   54.98    6.54
   0  -6  -3   59.42    7.02
   0   5   3 1161.92  127.92
   0   5   3 1077.18  118.67
   0  -5  -3 1013.46  111.55
   0  -5  -3  987.70  108.70
   0   4   3 1039.22  114.43
   0   4   3 1433.75  157.81
   0  -4  -3 1351.73  148.66
   0  -4  -3 1087.69  119.72
   0   3   3    8.41    2.37
   0   3   3    1.97    1.69
   0  -3  -3    7.29    1.73
   0  -3  -3    3.08    1.46
   0   1   3  666.71   73.48
   0   1   3  500.63   55.28
   0  -1  -3  688.07   75.79
   0  -1  -3  900.25   99.04
   0   0   3    2.78    2.30
   0   0   3    1.22    2.10
   0   0  -3    4.91    1.83
   0   0  -3    1.15    1.46
   0  -1   3 1454.77  160.09
   0  -1   3 1203.27  132.46
   0   1  -3 1361.56  149.85
   0   1  -3 1315.80  144.73
   0  -2   3 2576.01  283.23
   0  -2   3 2412.30  265.30
   0   2  -3 2268.25  249.50
   0   2  -3 2714.30  298.38
   0   3  -3    7.36    3.05
   0   3  -3    5.69    2.07
   0  -4   3 1424.94  156.90
   0  -4   3 1749.99  192.62
   0   4  -3 1304.95  143.82
   0   4  -3 1544.93  169.92
   0  -5   3 1416.47  155.98
   0  -5   3 1188.69  130.97
   0   5  -3 1968.96  216.76
   0   5  -3 1426.98  157.00
   0  -6   3   68.33    8.41
   0  -6   3   53.05    7.12
   0   6  -3   78.06    9.15
   0   6  -3   60.10    8.13
   0  -7   3  222.25   24.98
   0  -7   3  175.95   20.13
   0   7  -3  183.57   21.15
   0   7  -3  201.64   22.57
   0  -8   3 1759.15  193.71
   0  -8   3 2164.53  238.21
   0   8  -3 1533.74  169.17
   0   8  -3 2025.56  222.79
   0   9  -3   54.40    7.15
   0   9  -3   76.33   10.41
   0 -10   3 1543.91  169.95
   0 -10   3 1267.33  139.75
   0  10  -3 1786.94  196.69
   0  10  -3 2289.94  252.31
   0  11  -3   58.27    7.49
   0  11  -3   50.30    8.27
   0 -12   3 2025.22  222.93
   0 -12   3 1598.15  175.88
   0  12  -3 1428.33  157.78
   0  12  -3 1708.30  188.02
   0 -13   3 1199.20  132.22
   0 -13   3 1021.59  112.60
   0  13  -3 1276.14  140.60
   0  13  -3  955.16  105.85
   0 -14   3   22.10    3.56
   0 -14   3   22.64    5.02
   0  14  -3   23.35    4.71
   0  14  -3   17.15    6.51
   0 -15   3  112.19   13.35
   0 -15   3  103.55   12.07
   0  15  -3  106.40   13.96
   0  15  -3  143.00   16.61
   0 -16   3 3179.68  349.46
   0 -16   3 3487.79  383.69
   0  16  -3 2722.10  299.83
   0  16  -3 3363.39  369.79
   0 -17   3    0.98    2.71
   0 -17   3    2.71    4.10
   0  17  -3   13.39    5.80
   0  17  -3    0.20    4.10
   1  17   3  407.76   46.03
   1  17   3  409.11   45.52
  -1 -17  -3  432.50   47.79
  -1 -17  -3  474.53   52.44
   1  16   3   60.27   10.30
   1  16   3   69.35    9.19
  -1 -16  -3   71.52    8.61
  -1 -16  -3   62.40    7.73
   1  15   3  368.44   41.66
   1  15   3  378.61   42.30
  -1 -15  -3  518.25   57.32
  -1 -15  -3  462.67   51.18
   1  14   3   52.91    8.81
   1  14   3   59.28    7.90
  -1 -14  -3   73.15    8.81
  -1 -14  -3   71.11    8.61
   1  13   3  443.68   49.86
   1  13   3  486.73   54.10
  -1 -13  -3  493.51   54.64
  -1 -13  -3  435.21   48.13
   1  12   3  446.06   50.13
   1  12   3  459.95   51.11
  -1 -12  -3  521.64   57.76
  -1 -12  -3  450.80   49.86
   1  11   3  276.96   31.79
   1  11   3  304.55   34.13
  -1 -11  -3  293.16   32.64
  -1 -11  -3  273.60   30.44
   1  10   3  825.34   91.41
   1  10   3 1044.98  115.31
  -1 -10  -3  952.45  104.94
  -1 -10  -3 1112.09  122.53
   1   9   3 2132.33  234.96
   1   9   3 2465.18  271.33
  -1  -9  -3 2114.03  232.49
  -1  -9  -3 2371.63  260.86
   1   8   3   76.40    9.56
   1   8   3   75.28    9.69
  -1  -8  -3   76.20    8.98
  -1  -8  -3   76.81    9.08
   1   7   3   34.37    5.25
   1   7   3   33.35    6.03
  -1  -7  -3   47.18    5.86
  -1  -7  -3   35.28    4.75
   1   6   3   95.18   11.12
   1   6   3  107.18   12.95
  -1  -6  -3   99.35   11.42
  -1  -6  -3   74.98    8.74
   1   5   3 2640.75  290.55
   1   5   3 2005.90  220.66
  -1  -5  -3 1827.95  201.10
  -1  -5  -3 2269.26  249.53
   1   4   3   26.78    4.68
   1   4   3   14.71    3.25
  -1  -4  -3   28.71    3.93
  -1  -4  -3   18.03    3.02
  -1  -2  -3 1632.72  179.58
  -1  -2  -3 1156.49  127.28
   1   1   3  609.43   67.38
   1   1   3  543.34   59.99
  -1  -1  -3  860.25   94.77
  -1  -1  -3  644.68   71.08
   1   0   3    1.32    2.51
   1   0   3    3.42    2.41
  -1   0  -3   -1.02    2.00
  -1   0  -3    1.63    2.07
   1  -1   3  915.84  100.94
   1  -1   3 1012.78  111.65
  -1   1  -3 1003.97  110.60
  -1   1  -3  915.50  100.80
   1  -2   3 2749.22  302.44
   1  -2   3 2609.91  287.09
  -1   2  -3 2347.56  258.28
  -1   2  -3 2561.10  281.57
   1  -3   3 1180.56  130.12
   1  -3   3 1119.89  123.45
  -1   3  -3 1118.19  123.07
  -1   3  -3  996.17  109.85
   1  -4   3   22.51    4.41
   1  -4   3   28.98    4.81
  -1   4  -3   22.78    4.75
  -1   4  -3   24.61    3.63
   1  -5   3 2907.84  319.87
   1  -5   3 2516.70  276.92
  -1   5  -3 2305.87  253.84
  -1   5  -3 2793.96  307.19
   1  -6   3  104.43   12.61
   1  -6   3   78.23    9.59
  -1   6  -3  104.26   12.85
  -1   6  -3  122.97   14.03
   1  -7   3   42.20    6.88
   1  -7   3   43.72    6.17
  -1   7  -3   46.94    6.27
  -1   7  -3   41.59    7.05
   1  -8   3   86.33   11.05
   1  -8   3   87.18   10.37
  -1   8  -3   78.13   10.51
  -1   8  -3  100.46   11.80
   1  -9   3 2895.30  318.44
   1  -9   3 2552.63  280.92
  -1   9  -3 2203.85  242.86
  -1   9  -3 2851.92  313.63
  -1  10  -3 1127.68  124.26
  -1  10  -3 1554.76  171.61
   1 -11   3  356.91   40.06
   1 -11   3  345.73   38.47
  -1  11  -3  277.80   31.79
  -1  11  -3  314.17   35.01
   1 -12   3  528.42   58.47
   1 -12   3  620.95   68.94
  -1  12  -3  572.49   63.35
  -1  12  -3  462.67   51.86
   1 -13   3  486.73   53.86
   1 -13   3  730.44   80.87
  -1  13  -3  702.30   78.09
  -1  13  -3  537.23   59.45
   1 -14   3   78.77   10.34
   1 -14   3   67.25    8.20
  -1  14  -3   74.84    9.35
  -1  14  -3   73.08   10.41
   1 -15   3  561.30   62.23
   1 -15   3  491.14   54.30
  -1  15  -3  571.47   63.28
  -1  15  -3  441.99   49.66
   1 -16   3   66.94    8.07
   1 -16   3   87.35   10.71
  -1  16  -3   82.57   10.13
  -1  16  -3   61.15    9.35
   1 -17   3  506.05   55.99
   1 -17   3  521.98   57.66
  -1  17  -3  459.28   51.32
  -1  17  -3  524.02   57.96
  -2 -17  -3  191.37   21.42
  -2 -17  -3  169.00   18.95
   2  16   3  144.22   17.79
   2  16   3  173.44   20.10
  -2 -16  -3  203.27   22.81
  -2 -16  -3  164.83   18.57
   2  15   3   52.16    7.39
   2  15   3   43.39    8.64
  -2 -15  -3   54.94    6.88
  -2 -15  -3   55.66    6.88
   2  14   3   85.96   12.27
   2  14   3   97.24   11.73
  -2 -14  -3  102.23   11.86
  -2 -14  -3  131.41   14.98
  -2 -13  -3  203.20   22.88
  -2 -13  -3  181.47   20.40
   2  12   3 1050.40  116.33
   2  12   3  997.53  110.02
  -2 -12  -3  721.28   79.52
  -2 -12  -3  756.20   83.45
   2  11   3   10.13    4.71
   2  11   3   12.41    5.80
  -2 -11  -3    7.46    2.71
  -2 -11  -3   10.47    3.36
   2  10   3  410.13   46.06
   2  10   3  390.81   43.59
  -2 -10  -3  401.32   44.47
  -2 -10  -3  416.23   46.13
   2   9   3 1919.13  211.61
   2   9   3 2347.90  258.41
  -2  -9  -3 1944.89  213.94
  -2  -9  -3 2035.73  223.98
   2   8   3  539.27   60.10
   2   8   3  508.42   56.37
  -2  -8  -3  366.74   40.71
  -2  -8  -3  510.12   56.44
   2   7   3   -0.71    4.34
   2   7   3    0.41    3.36
  -2  -7  -3    6.64    2.88
  -2  -7  -3    4.78    2.78
   2   6   3 3789.45  416.91
   2   6   3 4653.77  511.81
  -2  -6  -3 4050.44  445.04
  -2  -6  -3 3809.79  418.94
   2   5   3  370.81   41.22
   2   5   3  465.04   51.72
  -2  -5  -3  424.36   46.94
  -2  -5  -3  364.37   40.37
   2   4   3  295.02   33.12
   2   4   3  199.91   22.54
  -2  -4  -3  294.04   32.64
  -2  -4  -3  216.28   24.13
   2   3   3 1171.41  129.11
   2   3   3 1715.08  188.90
  -2  -3  -3 1429.01  157.27
  -2  -3  -3 1847.27  203.20
   2   2   3 3528.46  388.10
   2   2   3 3433.55  377.59
  -2  -2  -3 3945.37  433.52
  -2  -2  -3 4341.94  477.24
   2   0   3    5.76    3.36
   2   0   3    3.32    3.08
  -2   0  -3    9.12    2.98
  -2   0  -3    4.81    2.51
   2  -1   3  223.67   25.22
   2  -1   3  210.28   23.69
  -2   1  -3  203.84   22.78
  -2   1  -3  278.35   31.05
   2  -2   3 6273.95  689.76
   2  -2   3 6063.80  666.71
  -2   2  -3 6748.48  741.96
  -2   2  -3 5785.86  635.87
   2  -3   3 3075.96  338.41
   2  -3   3 4087.73  449.45
   2  -4   3  374.20   41.79
   2  -4   3  335.73   37.59
  -2   4  -3  359.29   40.13
  -2   4  -3  359.96   39.93
   2  -5   3  517.91   57.42
   2  -5   3  535.20   59.45
  -2   5  -3  490.80   54.57
  -2   5  -3  510.80   56.50
   2  -6   3 5046.95  554.86
   2  -6   3 4874.09  535.88
  -2   6  -3 5416.41  595.87
  -2   6  -3 4599.54  505.37
   2  -7   3    8.17    3.63
   2  -7   3    3.53    4.95
  -2   7  -3    5.86    5.19
  -2   7  -3    8.61    3.59
   2  -8   3  683.66   75.65
   2  -8   3  613.16   68.06
   2  -9   3 3406.44  374.54
   2  -9   3 2589.57  285.06
  -2   9  -3 2239.44  246.35
  -2   9  -3 2253.00  248.25
   2 -10   3  434.19   48.20
   2 -10   3  548.76   61.08
  -2  10  -3  484.70   53.69
  -2  10  -3  429.45   48.20
   2 -11   3    6.41    3.22
   2 -11   3    9.90    4.95
  -2  11  -3   12.17    3.46
  -2  11  -3    9.69    5.80
   2 -12   3  865.68   95.48
   2 -12   3  965.33  106.70
  -2  12  -3  936.86  103.28
  -2  12  -3  782.97   86.91
   2 -13   3  191.03   22.07
   2 -13   3  203.74   22.95
  -2  13  -3  190.22   22.44
  -2  13  -3  210.49   23.76
   2 -14   3  125.11   14.91
   2 -14   3  119.92   13.83
  -2  14  -3  113.58   13.49
  -2  14  -3  111.28   14.34
   2 -15   3   59.52    7.49
   2 -15   3   73.79    9.42
  -2  15  -3   74.53   10.85
  -2  15  -3   68.13    8.98
   2 -16   3  217.84   24.61
   2 -16   3  203.06   22.71
  -2  16  -3  210.69   24.51
  -2  16  -3  216.49   24.37
   2 -17   3  206.25   23.05
   2 -17   3  231.98   26.07
  -2  17  -3  220.86   24.84
  -2  17  -3  214.86   24.71
   3  16   3 1744.91  192.05
   3  16   3 1909.98  210.52
  -3 -16  -3 1975.73  217.27
  -3 -16  -3 2009.29  220.99
   3  15   3    5.93    4.71
   3  15   3    3.25    7.02
  -3 -15  -3    1.73    2.61
  -3 -15  -3    5.05    3.05
   3  14   3    5.19    6.61
   3  14   3    1.80    4.30
  -3 -14  -3    4.64    3.02
  -3 -14  -3    4.27    3.32
  -3 -13  -3  700.95   77.35
  -3 -13  -3  558.93   61.76
   3  12   3 1332.75  147.24
   3  12   3 1206.32  132.94
  -3 -12  -3 1465.28  161.31
  -3 -12  -3 1218.86  134.19
   3  11   3   11.19    6.17
   3  11   3    6.41    4.20
  -3 -11  -3    4.64    2.78
  -3 -11  -3    5.66    3.05
   3  10   3  705.01   77.99
   3  10   3  703.32   78.23
  -3 -10  -3  827.71   91.31
  -3 -10  -3  748.74   82.60
   3   9   3   43.11    6.03
   3   9   3   51.08    8.07
  -3  -9  -3   57.18    7.25
  -3  -9  -3   48.13    6.17
   3   8   3 1314.44  144.80
   3   8   3 1554.76  171.58
  -3  -8  -3 1474.09  162.29
  -3  -8  -3 1216.49  133.99
   3   7   3  457.92   50.74
   3   7   3  398.60   44.67
  -3  -7  -3  517.58   57.21
  -3  -7  -3  459.28   50.88
   3   6   3  241.91   27.52
   3   6   3  165.10   18.81
  -3  -6  -3  197.07   22.13
  -3  -6  -3  197.00   22.20
   3   5   3  518.25   57.49
   3   5   3  737.89   81.89
  -3  -5  -3  728.40   80.43
  -3  -5  -3  534.18   59.08
   3   4   3  816.19   90.36
   3   4   3  585.70   64.87
  -3  -4  -3  826.02   91.08
  -3  -4  -3  577.23   63.76
   3   3   3   11.05    3.97
   3   3   3    5.25    4.17
  -3  -3  -3   10.51    2.88
  -3  -3  -3   12.95    2.98
   3   2   3 1411.72  155.61
   3   2   3 1466.29  161.54
  -3  -2  -3 1749.99  192.56
  -3  -2  -3 1835.07  201.88
   3   0   3    0.95    3.93
   3   0   3   -0.03    2.95
   3  -1   3 1351.05  149.00
   3  -1   3 1140.90  125.78
  -3   1  -3 1086.67  119.68
  -3   1  -3 1593.74  175.54
   3  -2   3 1996.41  219.84
   3  -2   3 1556.79  171.47
  -3   2  -3 2114.03  232.69
  -3   2  -3 1631.02  179.47
   3  -3   3   11.02    4.68
   3  -3   3   13.32    4.17
  -3   3  -3   16.71    4.14
  -3   3  -3   11.56    3.53
   3  -4   3 1366.30  150.80
   3  -4   3 1034.47  114.23
  -3   4  -3 1016.51  112.06
  -3   4  -3 1224.28  135.11
   3  -5   3  857.88   94.87
   3  -5   3  847.37   93.65
  -3   5  -3  969.06  106.80
  -3   5  -3  864.32   95.62
   3  -6   3  239.54   27.39
   3  -6   3  210.83   23.90
  -3   6  -3  238.11   27.18
  -3   6  -3  235.33   26.51
   3  -7   3  666.04   73.69
   3  -7   3  737.55   81.75
  -3   7  -3  641.63   70.94
  -3   7  -3  654.85   72.67
   3  -8   3 1771.35  195.03
   3  -8   3 2155.38  237.33
  -3   8  -3 1818.12  200.39
  -3   8  -3 2012.00  221.44
   3  -9   3   65.79    8.44
   3  -9   3   77.99   10.78
  -3   9  -3   58.54    9.12
  -3   9  -3   66.13    8.37
   3 -10   3 1062.61  117.34
   3 -10   3  928.38  102.43
  -3  10  -3  879.57   97.38
  -3  10  -3 1030.41  113.58
   3 -11   3    7.12    4.91
   3 -11   3    3.15    2.85
  -3  11  -3    5.19    3.76
  -3  11  -3    6.91    5.46
   3 -12   3 1678.14  184.73
   3 -12   3 1702.20  187.51
  -3  12  -3 1666.61  183.41
  -3  12  -3 1428.33  157.65
   3 -13   3  930.42  102.77
   3 -13   3  657.90   72.70
  -3  13  -3  552.15   61.65
  -3  13  -3  733.49   80.97
   3 -14   3    9.59    4.37
   3 -14   3    6.71    3.42
  -3  14  -3   -0.71    5.80
  -3  14  -3    7.52    4.51
   3 -15   3    7.25    3.90
   3 -15   3   -0.17    3.25
  -3  15  -3    0.27    5.56
  -3  15  -3    5.73    3.66
  -3  16  -3 2224.18  244.86
  -3  16  -3 2343.49  257.74
   4  15   3  534.52   59.82
   4  15   3  397.59   44.20
  -4 -15  -3  457.92   50.61
  -4 -15  -3  417.92   46.23
   4  14   3   27.39    5.46
   4  14   3    7.12    6.71
  -4 -14  -3   20.71    3.80
  -4 -14  -3   28.78    4.37
   4  13   3  935.84  103.68
   4  13   3  824.66   91.04
  -4 -13  -3  880.59   97.11
  -4 -13  -3  928.38  102.26
   4  12   3   55.59    7.32
   4  12   3   53.76    9.25
  -4 -12  -3   48.40    6.20
  -4 -12  -3   47.93    6.17
   4  11   3  402.67   44.84
   4  11   3  393.86   44.37
  -4 -11  -3  392.16   43.49
  -4 -11  -3  506.05   55.93
   4  10   3  958.21  106.16
   4  10   3 1007.70  111.21
  -4 -10  -3 1079.89  118.97
  -4 -10  -3  932.45  102.80
   4   9   3 1153.78  127.14
   4   9   3 1399.86  154.73
  -4  -9  -3 1105.31  121.78
  -4  -9  -3 1383.93  152.39
   4   8   3   20.40    6.17
   4   8   3    6.47    3.19
  -4  -8  -3    5.86    2.78
  -4  -8  -3   14.03    3.39
   4   7   3   99.21   12.74
   4   7   3   78.23    9.49
  -4  -7  -3   76.03    9.08
  -4  -7  -3   93.55   11.08
   4   6   3   84.47   10.24
   4   6   3   89.62   11.66
  -4  -6  -3   76.47    9.19
  -4  -6  -3   90.57   10.78
   4   5   3  903.30   99.75
   4   5   3  887.03   98.36
  -4  -5  -3  668.41   73.82
  -4  -5  -3  895.84   98.80
   4   4   3   58.16    8.44
   4   4   3   73.69    9.42
  -4  -4  -3   82.77   10.03
  -4  -4  -3   72.94    8.81
   4   3   3   22.40    4.61
   4   3   3   13.52    5.05
  -4  -3  -3   22.00    4.10
  -4  -3  -3   35.56    5.08
   4   2   3 2041.49  224.93
   4   2   3 1876.42  206.59
  -4  -2  -3 2011.32  221.27
  -4  -2  -3 2059.79  226.62
   4   1   3  704.00   78.13
   4   1   3  561.30   62.26
  -4  -1  -3  627.39   69.28
  -4  -1  -3  743.99   82.16
   4   0   3    1.32    4.34
   4   0   3   -1.49    3.42
  -4   0  -3   -0.41    3.36
  -4   0  -3    0.98    2.75
   4  -1   3  439.62   48.98
   4  -1   3  546.39   60.84
  -4   1  -3  571.47   63.35
  -4   1  -3  379.62   42.17
   4  -2   3 1769.99  195.00
   4  -2   3 1560.86  171.98
  -4   2  -3 1673.39  184.32
  -4   2  -3 1387.66  152.80
   4  -3   3   19.69    4.81
   4  -3   3   20.30    4.75
  -4   3  -3   29.96    5.42
  -4   3  -3   25.96    4.44
   4  -4   3   95.55   11.93
   4  -4   3  106.02   12.81
  -4   4  -3  114.50   13.69
  -4   4  -3   98.23   11.83
   4  -5   3 1192.42  131.65
   4  -5   3  996.85  110.09
  -4   5  -3 1242.25  137.07
  -4   5  -3 1139.21  125.65
   4  -6   3  133.95   16.41
   4  -6   3  104.53   12.37
  -4   6  -3  122.19   14.71
  -4   6  -3  131.04   15.29
   4  -7   3  125.72   15.18
   4  -7   3  108.43   12.85
  -4   7  -3  131.68   15.86
  -4   7  -3  113.85   13.42
  -4   8  -3   14.34    5.49
  -4   8  -3   19.15    4.64
   4  -9   3 1916.08  211.06
   4  -9   3 1813.38  199.67
  -4   9  -3 1705.93  188.02
  -4   9  -3 2033.69  223.77
   4 -11   3  553.50   61.25
   4 -11   3  639.26   70.84
  -4  11  -3  579.94   64.13
  -4  11  -3  554.86   61.69
   4 -12   3   66.26    8.13
   4 -12   3   75.35    9.90
  -4  12  -3   70.50    8.91
  -4  12  -3   64.87    9.15
   4 -13   3 1146.66  126.36
   4 -13   3 1168.36  128.83
  -4  13  -3 1004.65  110.97
  -4  13  -3 1290.38  142.19
   4 -14   3   36.17    5.36
   4 -14   3   44.37    6.61
  -4  14  -3   37.05    5.69
  -4  14  -3   31.69    6.30
   4 -15   3  536.90   59.42
   4 -15   3  571.81   63.18
  -4  15  -3  487.07   54.13
  -4  15  -3  569.77   62.98
   5  15   3    6.20    4.71
   5  15   3    4.41    6.51
  -5 -15  -3    4.75    2.98
   5  14   3  130.46   15.15
   5  14   3  147.44   18.07
  -5 -14  -3  120.46   13.83
  -5 -14  -3  117.07   13.35
   5  13   3   43.39    6.64
   5  13   3   50.91    8.10
  -5 -13  -3   37.15    5.29
  -5 -13  -3   48.94    6.24
   5  12   3  695.52   77.38
   5  12   3  723.66   79.96
  -5 -12  -3  696.20   76.84
  -5 -12  -3  675.19   74.50
   5  11   3   10.58    6.64
   5  11   3   12.34    4.41
  -5 -11  -3   14.85    3.63
  -5 -11  -3   16.57    3.53
   5  10   3   19.73    4.17
   5  10   3   11.35    6.00
  -5 -10  -3   15.96    3.56
  -5 -10  -3   21.42    4.14
   5   9   3 1250.04  137.72
   5   9   3 1410.71  155.85
  -5  -9  -3 1390.71  153.17
  -5  -9  -3 1278.18  140.77
   5   8   3  443.35   49.22
   5   8   3  433.52   48.71
  -5  -8  -3  412.50   45.72
  -5  -8  -3  458.94   50.84
   5   7   3   81.04   11.02
   5   7   3   93.08   11.22
  -5  -7  -3   68.23    8.24
  -5  -7  -3   95.38   11.22
   5   6   3 2247.23  247.37
   5   6   3 3075.96  338.71
  -5  -6  -3 2697.70  296.68
  -5  -6  -3 2271.98  249.98
   5   5   3 1089.72  120.26
   5   5   3  809.41   89.89
  -5  -5  -3  847.37   93.52
  -5  -5  -3  843.31   93.01
   5   4   3  146.60   17.69
   5   4   3  172.66   19.69
  -5  -4  -3  163.17   18.64
  -5  -4  -3  154.73   17.52
   5   3   3 2331.97  256.62
   5   3   3 1925.23  212.28
  -5  -3  -3 2752.27  302.75
  -5  -3  -3 2423.49  266.55
   5   2   3 1950.31  214.69
   5   2   3 2039.80  224.76
  -5  -2  -3 2048.27  225.37
  -5  -2  -3 2065.90  227.33
   5   1   3  834.15   92.40
   5   1   3  786.36   87.01
  -5  -1  -3  910.42  100.63
  -5  -1  -3  822.29   90.77
   5   0   3   -0.78    4.81
   5   0   3    4.68    4.10
  -5   0  -3    0.98    3.36
  -5   0  -3   -3.42    3.86
   5  -1   3  580.96   64.54
   5  -1   3  772.80   85.65
  -5   1  -3  522.32   57.86
  -5   1  -3  693.49   76.70
   5  -2   3 1837.10  202.49
   5  -2   3 1408.67  155.27
  -5   2  -3 1272.75  140.19
  -5   2  -3 1865.92  205.47
  -5   3  -3 2595.33  285.63
  -5   3  -3 1881.51  207.10
   5  -4   3  171.61   19.73
   5  -4   3  169.03   19.63
  -5   4  -3  167.78   19.25
  -5   4  -3  205.88   23.56
   5  -5   3 1116.16  123.24
   5  -5   3 1110.06  122.43
  -5   5  -3 1220.22  134.60
  -5   5  -3 1167.68  128.77
   5  -6   3 4328.38  476.22
   5  -6   3 4331.77  476.56
  -5   6  -3 4047.05  445.04
  -5   6  -3 4338.55  477.24
   5  -7   3  122.43   14.44
   5  -7   3  140.87   16.61
  -5   7  -3  132.12   15.73
  -5   7  -3  123.11   14.47
   5  -8   3  721.96   79.86
   5  -8   3  639.26   70.91
  -5   8  -3  802.63   88.84
  -5   8  -3  747.04   82.50
   5  -9   3 2073.35  228.21
   5  -9   3 2139.11  235.50
  -5   9  -3 2010.31  221.40
  -5   9  -3 2200.80  242.15
   5 -10   3   40.64    7.05
   5 -10   3   43.08    6.51
  -5  10  -3   32.10    5.49
  -5  10  -3   35.01    6.85
   5 -11   3   23.39    4.61
   5 -11   3   19.66    5.05
  -5  11  -3   30.71    5.19
  -5  11  -3   21.49    5.56
   5 -12   3  988.38  109.07
   5 -12   3  929.06  102.43
  -5  12  -3 1003.97  110.84
  -5  12  -3  946.68  104.43
   5 -13   3   70.94    8.85
   5 -13   3   75.62    9.76
  -5  13  -3   60.81    8.03
  -5  13  -3   64.71    9.08
   5 -14   3  172.22   19.66
   5 -14   3  160.59   18.20
  -5  14  -3  154.90   17.66
  -5  14  -3  148.49   17.29
   5 -15   3   16.71    4.71
   5 -15   3   12.37    3.63
  -5  15  -3   18.91    5.42
  -5  15  -3    8.74    3.69
   6  13   3  390.47   43.35
   6  13   3  349.46   39.49
  -6 -13  -3  363.69   40.33
  -6 -13  -3  425.72   47.08
   6  12   3  761.96   84.16
   6  12   3  683.66   75.99
  -6 -12  -3  665.36   73.38
  -6 -12  -3  733.82   80.94
   6  11   3   40.78    6.00
   6  11   3   53.83    8.85
  -6 -11  -3   47.11    6.27
  -6 -11  -3   46.37    6.10
   6  10   3  452.50   50.20
   6  10   3  513.51   57.62
  -6 -10  -3  415.55   46.03
  -6 -10  -3  515.54   57.05
   6   9   3   75.52   10.81
   6   9   3   73.18    9.08
  -6  -9  -3   64.57    7.90
  -6  -9  -3   97.55   11.52
   6   8   3  682.64   76.06
   6   8   3  777.89   85.96
  -6  -8  -3  655.19   72.37
  -6  -8  -3  551.13   60.94
   6   7   3  455.55   50.67
   6   7   3  480.97   53.86
  -6  -7  -3  607.40   67.11
  -6  -7  -3  451.82   50.10
   6   6   3  589.43   65.32
   6   6   3  516.90   57.82
  -6  -6  -3  637.90   70.47
  -6  -6  -3  527.40   58.40
   6   5   3  311.90   34.84
   6   5   3  285.02   32.64
  -6  -5  -3  268.75   30.10
  -6  -5  -3  289.94   32.30
   6   4   3  630.78   69.79
   6   4   3  662.31   73.89
  -6  -4  -3  617.57   68.23
  -6  -4  -3  651.12   71.99
   6   3   3   20.68    4.10
   6   3   3   10.10    6.61
  -6  -3  -3    6.37    3.25
  -6  -3  -3    4.51    3.46
   6   2   3 3054.27  335.93
   6   2   3 4223.31  464.36
  -6  -2  -3 3291.20  362.00
  -6  -2  -3 3494.57  384.37
   6   1   3 1987.60  218.96
   6   1   3 1778.13  195.81
  -6  -1  -3 1841.17  202.62
  -6  -1  -3 1902.52  209.37
   6   0   3    4.75    3.63
   6   0   3   -1.76    4.75
  -6   0  -3    2.64    2.95
  -6   0  -3    1.53    3.15
   6  -1   3 1958.45  215.81
   6  -1   3 1582.55  174.39
  -6   1  -3 1586.28  174.63
  -6   1  -3 1794.40  197.51
   6  -2   3 2870.56  316.00
   6  -2   3 2461.11  270.85
  -6   2  -3 2995.29  329.42
  -6   2  -3 2798.70  307.87
   6  -3   3    9.69    4.00
   6  -3   3    6.51    4.68
  -6   3  -3    8.30    3.90
  -6   3  -3    3.29    3.86
   6  -4   3  617.90   68.64
   6  -4   3  707.05   78.20
  -6   4  -3  579.60   64.23
  -6   4  -3  591.47   65.65
   6  -5   3  336.88   37.86
   6  -5   3  408.09   45.49
  -6   5  -3  406.40   45.35
  -6   5  -3  342.34   38.37
   6  -6   3  968.72  107.04
   6  -6   3  852.12   94.19
  -6   6  -3  882.96   97.55
  -6   6  -3  852.80   94.23
   6  -7   3  748.74   82.91
   6  -7   3  760.26   84.09
  -6   7  -3  729.76   80.70
  -6   7  -3  791.45   87.48
  -6   8  -3 1030.74  113.75
  -6   8  -3 1407.66  155.07
  -6   9  -3  126.16   15.15
  -6   9  -3  182.69   20.81
   6 -10   3  683.32   75.59
   6 -10   3  691.12   76.37
  -6  10  -3  737.89   81.55
  -6  10  -3  733.15   81.14
   6 -11   3  116.43   13.83
   6 -11   3  102.29   12.10
  -6  11  -3   80.97   10.58
  -6  11  -3   79.11   10.27
  -6  12  -3 1070.74  117.95
  -6  12  -3 1112.09  122.67
   6 -13   3  528.42   58.54
   6 -13   3  438.26   48.47
  -6  13  -3  471.14   52.16
  -6  13  -3  558.93   61.99
   7  12   3   51.52    6.68
   7  12   3   45.08    7.80
  -7 -12  -3   60.77    7.42
  -7 -12  -3   50.06    6.34
   7  11   3  324.51   36.13
   7  11   3  324.71   36.98
  -7 -11  -3  318.10   35.32
  -7 -11  -3  350.81   38.91
   7  10   3  633.83   70.74
   7  10   3  525.03   58.16
  -7 -10  -3  468.09   51.76
  -7 -10  -3  686.71   75.79
  -7  -9  -3  312.68   34.78
  -7  -9  -3  372.84   41.42
  -7  -8  -3   84.94    9.97
  -7  -8  -3   85.45   10.20
   7   7   3   55.93    8.91
   7   7   3   39.45    5.66
  -7  -7  -3   41.42    5.49
  -7  -7  -3   37.08    5.42
   7   6   3  150.36   17.90
   7   6   3  160.46   18.34
  -7  -6  -3  151.61   17.39
  -7  -6  -3  162.90   18.44
   7   5   3  732.13   81.42
   7   5   3  681.97   75.38
  -7  -5  -3  724.00   79.99
  -7  -5  -3  729.08   80.47
   7   4   3  239.09   26.91
   7   4   3  288.34   33.05
  -7  -4  -3  246.38   27.52
  -7  -4  -3  257.87   28.95
   7   3   3  101.41   13.49
   7   3   3   85.35   10.51
  -7  -3  -3   79.11    9.73
  -7  -3  -3   70.40    8.71
   7   2   3 1180.90  130.29
   7   2   3 1180.90  130.46
  -7  -2  -3 1293.09  142.53
  -7  -2  -3 1146.33  126.36
   7   1   3  339.29   38.20
   7   1   3  347.42   38.84
  -7  -1  -3  370.13   41.18
  -7  -1  -3  346.41   38.54
   7   0   3    7.76    4.58
   7   0   3   -0.98    3.73
  -7   0  -3    1.73    3.29
  -7   0  -3    0.95    3.46
   7  -1   3  326.81   36.50
   7  -1   3  323.87   36.44
  -7   1  -3  348.44   38.74
  -7   1  -3  351.15   39.15
   7  -2   3 1046.00  115.58
   7  -2   3  967.70  106.80
  -7   2  -3 1060.57  116.97
  -7   2  -3 1051.76  116.02
   7  -3   3   62.33    8.64
   7  -3   3   59.08    8.13
  -7   3  -3   59.93    8.10
  -7   3  -3   64.40    8.68
   7  -4   3  215.61   24.64
   7  -4   3  273.50   30.95
  -7   4  -3  208.11   23.69
  -7   4  -3  211.84   24.13
   7  -5   3  766.03   84.84
   7  -5   3  701.62   77.69
  -7   5  -3  677.22   75.01
  -7   5  -3  841.61   92.97
  -7   6  -3  188.39   21.62
  -7   6  -3  197.40   22.51
   7  -7   3   67.18    8.88
   7  -7   3   55.11    7.86
  -7   7  -3   63.04    8.37
  -7   7  -3   50.74    7.29
   7  -8   3  118.12   13.86
   7  -8   3  127.11   15.05
  -7   8  -3  116.12   13.86
  -7   8  -3  126.06   14.85
   7  -9   3  482.66   53.59
   7  -9   3  462.33   51.38
  -7   9  -3  532.83   59.01
  -7   9  -3  496.56   55.18
   7 -10   3  929.74  102.57
   7 -10   3  945.67  104.33
  -7  10  -3  914.15  100.87
  -7  10  -3  850.76   93.92
   7 -11   3  578.59   63.99
   7 -11   3  512.15   56.71
  -7  11  -3  515.20   57.08
  -7  11  -3  571.13   63.18
   7 -12   3   89.92   10.81
   7 -12   3   82.03    9.86
  -7  12  -3   95.08   11.56
  -7  12  -3   87.82   10.74
   8  10   3   13.56    5.97
   8  10   3   19.49    4.58
  -8 -10  -3   20.00    3.53
  -8 -10  -3   13.63    3.49
   8   9   3  776.19   85.62
   8   9   3  722.98   80.36
  -8  -9  -3  781.62   86.16
  -8  -9  -3  840.93   92.70
   8   8   3  367.42   40.78
   8   8   3  342.34   38.95
  -8  -8  -3  299.39   33.35
  -8  -8  -3  355.22   39.39
   8   7   3  146.83   16.74
   8   7   3  141.48   17.39
  -8  -7  -3  153.41   17.32
  -8  -7  -3  149.95   17.18
   8   6   3  882.62   97.35
   8   6   3 1125.65  124.46
  -8  -6  -3 1162.26  128.05
  -8  -6  -3 1130.73  124.53
   8   5   3 1338.51  147.85
   8   5   3 1185.98  130.66
  -8  -5  -3 1309.70  144.22
  -8  -5  -3 1329.36  146.32
   8   4   3  118.63   14.61
   8   4   3  121.58   14.10
  -8  -4  -3   98.77   11.63
  -8  -4  -3  104.57   12.30
   8   3   3 1820.83  200.39
   8   3   3 1973.70  217.50
  -8  -3  -3 1678.82  184.73
  -8  -3  -3 2303.84  253.47
   8   2   3  309.83   35.12
   8   2   3  229.60   25.79
  -8  -2  -3  231.10   25.96
  -8  -2  -3  208.96   23.49
   8   1   3  619.94   68.81
   8   1   3  633.83   70.06
  -8  -1  -3  618.24   68.33
  -8  -1  -3  580.62   64.23
   8   0   3    2.61    3.93
   8   0   3    4.44    4.71
  -8   0  -3    2.17    3.80
  -8   0  -3    4.91    3.73
   8  -1   3  643.66   71.28
   8  -1   3  659.26   73.01
  -8   1  -3  651.12   71.96
  -8   1  -3  703.66   77.72
   8  -2   3  219.33   24.91
   8  -2   3  197.84   22.64
  -8   2  -3  227.77   25.66
  -8   2  -3  202.62   22.91
  -8   3  -3 1796.43  197.78
  -8   3  -3 1544.25  170.05
   8  -4   3   85.35   10.81
   8  -4   3  121.82   14.54
  -8   4  -3   91.89   11.19
  -8   4  -3  110.67   13.35
   8  -5   3 1484.94  163.68
   8  -5   3 1243.60  137.14
  -8   5  -3 1123.62  123.89
  -8   5  -3 1255.13  138.33
   8  -6   3 1055.49  116.46
   8  -6   3 1338.17  147.51
  -8   6  -3 1026.00  113.18
  -8   6  -3 1123.28  123.78
   8  -7   3  240.04   27.18
   8  -7   3  187.78   21.39
  -8   7  -3  151.92   17.59
  -8   7  -3  202.15   22.98
   8  -8   3  471.48   52.30
   8  -8   3  382.67   42.64
  -8   8  -3  437.58   48.61
  -8   8  -3  421.31   46.91
   8  -9   3 1055.83  116.43
   8  -9   3 1158.19  127.65
  -8   9  -3  835.51   92.19
  -8   9  -3 1100.23  121.24
   8 -10   3   32.20    5.36
   8 -10   3   27.32    4.68
  -8  10  -3   24.51    5.02
  -8  10  -3   28.17    5.63
   9   7   3  351.15   39.45
   9   7   3  337.05   37.45
  -9  -7  -3  329.63   36.54
  -9  -7  -3  345.73   38.37
   9   6   3 1623.91  179.10
   9   6   3 1560.18  171.71
  -9  -6  -3 1484.26  163.37
  -9  -6  -3 1477.14  162.53
   9   5   3  127.95   14.78
   9   5   3  153.14   18.17
   9   4   3  401.65   44.94
   9   4   3  384.03   42.71
  -9  -4  -3  381.66   42.40
  -9  -4  -3  407.08   45.18
   9   3   3   15.35    5.83
   9   3   3   31.32    5.32
  -9  -3  -3   20.74    4.27
  -9  -3  -3   13.90    3.59
   9   2   3 3870.80  425.72
   9   2   3 3569.13  392.16
  -9  -2  -3 3504.73  385.39
  -9  -2  -3 3589.47  394.88
   9   1   3  609.43   67.65
   9   1   3  670.10   74.09
  -9  -1  -3  714.17   78.87
  -9  -1  -3  649.43   71.76
   9   0   3    2.61    4.20
   9   0   3   -0.47    3.86
  -9   0  -3    2.68    3.39
  -9   0  -3   -0.17    3.39
   9  -1   3  636.89   70.54
   9  -1   3  779.24   86.06
  -9   1  -3  674.85   74.53
  -9   1  -3  787.72   86.91
   9  -2   3 3938.59  433.18
   9  -2   3 2996.65  329.59
  -9   2  -3 3184.77  350.13
  -9   2  -3 3816.57  419.62
   9  -3   3   16.51    4.68
   9  -3   3   14.47    4.95
  -9   3  -3   19.25    4.85
  -9   3  -3   11.05    3.80
   9  -4   3  429.79   47.86
   9  -4   3  346.41   38.64
  -9   4  -3  352.85   39.22
  -9   4  -3  401.99   44.64
   9  -5   3  124.70   14.61
   9  -5   3  158.46   18.40
  -9   5  -3  136.12   15.86
  -9   5  -3  111.75   13.19
   9  -6   3 1661.53  182.96
   9  -6   3 1411.38  155.41
  -9   6  -3 1524.59  167.85
  -9   6  -3 1460.19  160.76
   9  -7   3  345.39   38.54
   9  -7   3  422.67   46.98
  -9   7  -3  359.29   39.96
  -9   7  -3  329.56   36.67
  -9   8  -3  291.73   32.71
  10   3   3   14.61    5.15
  10   3   3   16.88    4.14
 -10  -3  -3   13.05    3.66
 -10  -3  -3   12.24    3.66
  10   2   3  273.53   30.44
  10   2   3  304.14   34.17
 -10  -2  -3  279.36   31.08
 -10  -2  -3  354.54   39.32
  10   1   3  328.20   36.54
  10   1   3  351.83   39.28
 -10  -1  -3  339.63   37.69
 -10  -1  -3  302.31   33.52
  10   0   3   -2.95    3.76
  10   0   3    3.59    3.97
 -10   0  -3    2.37    3.02
 -10   0  -3   -3.80    3.12
  10  -1   3  298.07   33.32
  10  -1   3  448.77   49.76
 -10   1  -3  278.92   30.98
 -10   1  -3  362.34   40.27
 -10   2  -3  303.16   33.66
 -10   2  -3  371.49   41.25
  10  -3   3   10.64    4.17
  10  -3   3   12.61    4.68
 -10   3  -3    8.85    3.49
 -10   3  -3   10.27    3.46
  12  -6  -4  184.25   20.81
  12  -6  -4  192.93   21.83
 -12   5   4    0.71    5.80
 -12   5   4    8.20    5.32
  12  -5  -4    7.49    4.17
  12  -5  -4    1.97    4.07
 -12   4   4 2606.86  286.78
 -12   4   4 2072.00  228.18
  12  -4  -4 2145.89  236.11
  12  -4  -4 2020.48  222.32
 -12   3   4   70.13    9.76
 -12   3   4   66.03    9.29
  12  -3  -4   64.84    8.64
  12  -3  -4   72.60    9.15
 -12   2   4  133.51   15.93
 -12   2   4  136.09   16.24
  12  -2  -4  113.75   13.29
  12  -2  -4  117.65   14.07
 -12   1   4  364.37   40.67
 -12   1   4  421.65   47.01
  12  -1  -4  371.15   41.32
  12  -1  -4  366.40   40.88
 -12   0   4 3640.31  400.30
 -12   0   4 3453.89  379.96
  12   0  -4 3263.40  358.95
  12   0  -4 3328.14  366.07
 -12  -1   4  421.31   46.98
 -12  -1   4  414.20   46.03
  12   1  -4  322.27   35.89
  12   1  -4  339.29   37.96
 -12  -2   4  124.53   14.95
 -12  -2   4  144.49   16.74
  12   2  -4  108.16   12.81
  12   2  -4  109.55   13.35
 -12  -3   4   56.23    8.24
 -12  -3   4   50.27    7.05
  12   3  -4   64.47    9.19
  12   3  -4   54.64    7.29
 -12  -4   4 1568.32  172.76
 -12  -4   4 1793.04  197.34
  12   4  -4 1811.01  199.47
  12   4  -4 1689.32  185.91
 -12  -5   4    9.80    4.64
 -12  -5   4    3.42    4.07
  12   5  -4    0.98    3.49
  12   5  -4    0.81    5.12
 -12  -6   4  167.71   19.22
 -12  -6   4  139.27   16.00
  12   6  -4  149.65   17.12
  12   6  -4  140.16   16.34
 -11   9   4    5.97    4.98
  11  -9  -4    7.49    3.49
  11  -9  -4    5.36    3.36
 -11   8   4    6.51    6.00
 -11   8   4    0.03    4.91
  11  -8  -4    0.98    3.63
  11  -8  -4    8.03    3.93
  11  -7  -4 3009.87  330.98
  11  -7  -4 2622.11  288.48
  11  -6  -4   51.28    7.12
  11  -6  -4   59.25    7.73
  11  -5  -4  518.93   57.55
  11  -5  -4  623.33   68.94
 -11   4   4  300.51   34.13
 -11   4   4  411.48   45.86
  11  -4  -4  336.00   37.56
  11  -4  -4  408.77   45.55
 -11   3   4  977.53  108.02
 -11   3   4 1011.42  111.62
  11  -3  -4  883.64   97.58
  11  -3  -4  980.24  108.12
 -11   2   4  141.65   16.78
 -11   2   4  146.83   17.32
  11  -2  -4  123.28   14.61
  11  -2  -4  126.90   14.85
 -11   1   4 2170.63  238.89
 -11   1   4 2008.95  221.16
  11  -1  -4 1927.60  212.11
  11  -1  -4 2002.85  220.49
 -11   0   4  376.23   41.93
 -11   0   4  323.12   36.20
  11   0  -4  315.53   35.25
  11   0  -4  326.61   36.57
 -11  -1   4 2088.60  229.84
 -11  -1   4 1711.02  188.49
  11   1  -4 1761.52  193.98
  11   1  -4 1819.48  200.29
 -11  -2   4  130.29   15.22
 -11  -2   4  107.04   12.98
  11   2  -4  103.21   12.61
  11   2  -4  123.99   14.47
 -11  -3   4  548.42   60.84
 -11  -3   4  724.33   80.03
  11   3  -4  620.28   68.77
  11   3  -4  667.73   73.72
 -11  -4   4  264.18   29.73
 -11  -4   4  224.32   25.52
  11   4  -4  245.26   27.56
  11   4  -4  259.57   29.42
 -11  -5   4  402.67   44.91
 -11  -5   4  391.15   43.49
  11   5  -4  464.02   51.76
  11   5  -4  432.84   48.06
 -11  -6   4   51.38    7.42
 -11  -6   4   40.50    6.17
  11   6  -4   55.89    7.66
  11   6  -4   31.69    6.07
 -11  -7   4 2263.50  248.99
 -11  -7   4 2127.24  234.11
  11   7  -4 2263.50  249.03
  11   7  -4 2426.88  267.09
  11   8  -4    3.86    3.46
  11   8  -4    6.07    4.64
 -11  -9   4   -1.08    3.12
 -11  -9   4    0.88    4.30
  11   9  -4    1.86    3.29
  11   9  -4    3.02    4.30
 -10  11   4  419.28   46.74
  10 -11  -4  317.53   35.35
  10 -11  -4  349.80   38.81
 -10  10   4   99.31   12.24
  10 -10  -4   89.31   10.68
  10 -10  -4   98.02   11.76
  10  -9  -4  232.59   26.13
  10  -9  -4  208.49   23.52
  10  -8  -4  156.73   17.90
  10  -8  -4  144.09   16.57
  10  -7  -4  560.28   61.96
  10  -7  -4  501.64   55.59
  10  -6  -4  806.70   88.94
  10  -6  -4  767.38   84.77
 -10   5   4    8.81    4.81
 -10   5   4    0.34    5.25
  10  -5  -4   -1.66    3.76
  10  -5  -4    1.69    3.73
  10  -4  -4  141.58   16.44
  10  -4  -4  108.87   12.95
 -10   3   4  727.38   80.50
 -10   3   4  582.99   64.71
  10  -3  -4  682.64   75.55
  10  -3  -4  538.25   59.62
 -10   2   4   68.30    9.15
 -10   2   4   65.62    9.22
  10  -2  -4   70.30    9.39
  10  -2  -4   61.99    8.13
  10  -1  -4   16.81    4.85
  10  -1  -4   11.59    4.10
 -10   0   4 2655.33  292.11
 -10   0   4 1857.10  204.49
  10   0  -4 1935.74  213.17
  10   0  -4 2198.42  241.87
 -10  -1   4   11.02    4.54
 -10  -1   4   14.85    4.17
  10   1  -4    4.81    4.07
  10   1  -4   12.17    3.32
 -10  -2   4   58.33    7.80
 -10  -2   4   41.93    6.68
  10   2  -4   52.67    7.59
  10   2  -4   51.93    6.98
 -10  -3   4  396.23   44.20
 -10  -3   4  473.51   52.50
 -10  -4   4   83.28   10.34
 -10  -4   4   87.21   10.91
  10   4  -4  105.99   12.95
  10   4  -4  102.40   12.07
 -10  -5   4   -0.34    4.75
 -10  -5   4    0.44    3.42
  10   5  -4   -2.61    4.68
  10   5  -4    1.22    3.08
 -10  -6   4  577.23   63.86
 -10  -6   4  636.55   70.54
  10   6  -4  624.01   68.98
  10   6  -4  698.57   77.48
 -10  -7   4  412.84   45.79
 -10  -7   4  452.50   50.27
  10   7  -4  423.35   47.22
  10   7  -4  519.61   57.52
 -10  -8   4  124.22   14.37
 -10  -8   4  116.26   13.93
  10   8  -4  117.17   14.17
  10   8  -4  130.80   15.08
 -10  -9   4  214.79   24.20
 -10  -9   4  178.52   20.47
  10   9  -4  193.61   22.24
  10   9  -4  202.62   22.78
 -10 -10   4   82.50    9.93
 -10 -10   4   87.08   10.74
  10  10  -4   79.82   10.37
  10  10  -4   78.26    9.63
 -10 -11   4  333.42   36.98
 -10 -11   4  322.98   36.06
  10  11  -4  340.98   37.83
  10  11  -4  323.39   36.27
  -9  13   4  177.47   20.44
   9 -13  -4  208.59   23.42
   9 -13  -4  204.08   23.01
  -9  12   4  351.15   39.45
   9 -12  -4  331.09   36.81
   9 -12  -4  329.46   36.67
  -9  11   4  159.88   18.98
   9 -11  -4  151.71   17.42
   9 -11  -4  148.46   17.05
  -9  10   4  297.06   33.49
  -9  10   4  209.10   24.34
   9 -10  -4  312.17   34.78
   9 -10  -4  299.50   33.35
  -9   9   4  347.42   38.88
  -9   9   4  252.72   28.98
   9  -9  -4  356.24   39.62
   9  -9  -4  361.32   40.17
  -9   8   4  894.83   98.94
  -9   8   4 1302.24  143.54
   9  -8  -4 1147.34  126.46
   9  -8  -4 1180.56  130.05
  -9   7   4 1578.49  173.81
  -9   7   4 1249.03  137.88
   9  -7  -4 1325.63  146.02
   9  -7  -4 1447.31  159.31
  -9   6   4  548.42   60.74
  -9   6   4  434.87   48.67
   9  -6  -4  463.00   51.42
   9  -6  -4  530.46   58.64
  -9   5   4  132.80   15.42
  -9   5   4  105.65   13.59
   9  -5  -4  118.90   13.73
   9  -5  -4  115.75   13.52
  -9   4   4 1004.98  111.11
  -9   4   4 1497.14  164.86
   9  -4  -4 1106.67  121.99
   9  -4  -4 1465.28  161.34
  -9   3   4  382.67   42.64
  -9   3   4  289.12   32.51
   9  -3  -4  395.55   44.00
   9  -3  -4  307.70   34.34
  -9   2   4  196.66   22.54
  -9   2   4  183.03   20.91
   9  -2  -4  174.25   19.76
   9  -2  -4  185.13   21.12
   9  -1  -4  211.06   23.79
   9  -1  -4  210.76   23.93
   9   0  -4 5633.33  619.26
   9   0  -4 5070.68  557.57
  -9  -1   4  232.82   26.20
  -9  -1   4  154.26   18.00
   9   1  -4  148.43   17.22
   9   1  -4  185.78   21.05
  -9  -2   4  138.80   16.10
  -9  -2   4  125.82   14.98
   9   2  -4  131.38   15.18
   9   2  -4  146.49   17.08
  -9  -3   4  218.15   24.64
  -9  -3   4  273.97   30.88
   9   3  -4  335.63   37.56
   9   3  -4  283.23   31.66
  -9  -4   4  875.51   96.60
  -9  -4   4 1079.89  119.17
   9   4  -4  915.84  101.01
   9   4  -4  952.45  105.18
  -9  -5   4   91.08   11.35
  -9  -5   4   81.18    9.86
   9   5  -4   97.65   12.07
   9   5  -4   80.33    9.69
  -9  -6   4  385.05   42.98
  -9  -6   4  377.59   41.96
   9   6  -4  388.77   43.42
   9   6  -4  364.71   40.50
  -9  -7   4 1250.72  137.78
  -9  -7   4 1033.79  114.06
   9   7  -4 1174.12  129.31
   9   7  -4  974.48  107.65
  -9  -8   4  915.16  101.04
  -9  -8   4 1005.32  110.87
   9   8  -4 1037.86  114.36
   9   8  -4  824.32   91.14
  -9  -9   4  290.00   32.54
  -9  -9   4  300.34   33.49
   9   9  -4  337.08   37.49
   9   9  -4  310.55   35.01
  -9 -10   4  318.21   35.49
  -9 -10   4  266.72   29.93
   9  10  -4  333.32   37.11
   9  10  -4  274.35   31.05
  -9 -11   4  136.22   15.96
  -9 -11   4  137.34   15.80
   9  11  -4  134.26   16.03
   9  11  -4  136.87   15.76
  -9 -12   4  314.27   34.98
  -9 -12   4  323.46   36.06
   9  12  -4  329.49   36.67
   9  12  -4  315.83   35.56
  -9 -13   4  208.96   23.39
  -9 -13   4  198.25   22.40
   9  13  -4  211.13   24.07
   9  13  -4  192.08   21.56
  -8  14   4  263.94   29.86
   8 -14  -4  232.49   26.07
   8 -14  -4  274.07   30.54
  -8  13   4   41.69    7.59
   8 -13  -4   43.35    6.30
   8 -13  -4   43.05    6.07
  -8  12   4    2.54    5.59
   8 -12  -4    3.86    3.69
   8 -12  -4    4.78    3.22
  -8  11   4  357.59   40.20
  -8  11   4  458.94   51.15
   8 -11  -4  389.45   43.18
   8 -11  -4  424.70   47.05
  -8  10   4  655.87   72.74
  -8  10   4  748.40   82.81
   8 -10  -4  754.50   83.25
   8 -10  -4  720.61   79.52
  -8   9   4   12.37    4.95
  -8   9   4   21.93    6.17
   8  -9  -4   18.10    3.63
   8  -9  -4   15.18    3.63
  -8   8   4  141.95   16.88
  -8   8   4  123.11   14.54
   8  -8  -4  123.21   14.17
   8  -8  -4  187.95   21.18
  -8   7   4 5796.03  637.22
  -8   7   4 5514.70  606.38
   8  -7  -4 5890.94  647.73
   8  -7  -4 5558.77  611.13
  -8   6   4  123.82   14.44
  -8   6   4   97.04   12.27
   8  -6  -4  111.62   13.02
   8  -6  -4  116.29   13.39
  -8   5   4 1443.92  159.20
  -8   5   4 1471.72  162.05
   8  -5  -4 1363.93  150.15
   8  -5  -4 1373.42  151.27
  -8   4   4 1130.40  124.53
  -8   4   4  871.10   96.36
   8  -4  -4  878.56   96.91
   8  -4  -4  962.28  106.06
  -8   3   4  543.67   60.43
  -8   3   4  817.55   90.23
   8  -3  -4  819.24   90.40
   8  -3  -4  673.83   74.47
  -8   2   4  146.66   16.98
  -8   2   4  159.17   18.44
   8  -2  -4  147.38   16.91
   8  -2  -4  157.24   17.93
   8  -1  -4 3765.73  413.86
   8  -1  -4 3101.38  341.32
  -8   0   4   61.76    8.07
  -8   0   4   39.45    6.17
   8   0  -4   45.96    6.10
   8   0  -4   52.64    6.95
  -8  -1   4 2814.29  309.63
  -8  -1   4 3140.70  345.39
  -8  -2   4  131.68   15.39
  -8  -2   4  103.14   11.96
   8   2  -4  121.31   14.20
   8   2  -4  132.63   15.15
  -8  -3   4  549.44   60.84
  -8  -3   4  608.75   67.42
   8   3  -4  604.01   66.84
   8   3  -4  568.08   62.77
  -8  -4   4  771.11   85.21
  -8  -4   4  762.64   84.36
   8   4  -4  674.51   74.43
   8   4  -4  809.75   89.52
  -8  -5   4 1140.90  125.85
  -8  -5   4 1028.71  113.45
   8   5  -4 1288.68  142.09
   8   5  -4 1041.59  114.73
  -8  -6   4   92.06   11.35
  -8  -6   4   87.52   10.58
   8   6  -4   89.75   10.61
   8   6  -4   82.81   10.47
  -8  -7   4 5019.84  552.15
  -8  -7   4 4277.54  470.46
   8   7  -4 4718.17  518.59
   8   7  -4 5321.50  585.03
  -8  -8   4  105.89   12.61
  -8  -8   4  131.55   15.22
   8   8  -4   78.26    9.49
   8   8  -4  119.01   14.24
  -8  -9   4   11.96    4.07
  -8  -9   4   15.90    3.90
   8   9  -4   15.76    4.81
   8   9  -4   14.24    4.14
  -8 -10   4  600.28   66.33
  -8 -10   4  809.41   89.41
   8  10  -4  743.99   82.43
   8  10  -4  783.65   86.43
  -8 -11   4  559.27   61.86
  -8 -11   4  418.94   46.57
   8  11  -4  420.97   47.11
   8  11  -4  427.08   47.32
  -8 -12   4    2.07    2.91
  -8 -12   4   -0.31    3.73
   8  12  -4    4.34    4.75
   8  12  -4    3.83    3.42
  -8 -13   4   53.18    7.19
  -8 -13   4   46.33    6.03
   8  13  -4   62.57    7.90
   8  13  -4   49.28    7.69
  -8 -14   4  232.72   25.93
  -8 -14   4  270.75   30.27
   8  14  -4  323.90   35.96
   8  14  -4  279.36   31.42
  -7  15   4  764.33   84.67
   7 -15  -4  638.92   70.50
   7 -15  -4  709.76   78.33
  -7  14   4  547.06   60.91
   7 -14  -4  465.72   51.55
   7 -14  -4  416.91   46.23
  -7  13   4  760.60   84.23
   7 -13  -4  618.24   68.26
   7 -13  -4  682.98   75.35
  -7  12   4  279.02   31.79
  -7  12   4  273.70   30.98
   7 -12  -4  271.77   30.30
   7 -12  -4  276.72   30.84
  -7  11   4  896.86   99.07
  -7  11   4  734.16   81.28
   7 -11  -4  809.07   89.21
   7 -11  -4  768.74   84.81
  -7  10   4   22.47    6.07
  -7  10   4   16.03    5.15
   7 -10  -4   17.08    3.63
   7 -10  -4   29.08    4.34
  -7   9   4  681.63   75.38
  -7   9   4  542.32   60.30
   7  -9  -4  548.42   60.57
   7  -9  -4  583.67   64.47
  -7   8   4  234.28   26.71
  -7   8   4  207.95   23.59
   7  -8  -4  201.98   22.61
   7  -8  -4  219.71   24.61
  -7   7   4 2460.09  270.79
  -7   7   4 2012.68  221.60
   7  -7  -4 1882.86  207.13
   7  -7  -4 2216.39  243.81
  -7   6   4  462.33   51.28
  -7   6   4  607.06   67.21
   7  -6  -4  517.24   57.15
   7  -6  -4  492.15   54.44
  -7   5   4    9.52    3.15
  -7   5   4   21.56    5.25
   7  -5  -4    8.71    2.78
   7  -5  -4   13.76    3.19
  -7   4   4  306.51   34.57
  -7   4   4  247.23   27.59
   7  -4  -4  238.72   26.57
   7  -4  -4  261.36   29.18
  -7   3   4  518.93   57.35
  -7   3   4  622.99   69.01
   7  -3  -4  603.33   66.67
   7  -3  -4  580.96   64.16
  -7   2   4   22.98    4.07
  -7   2   4   14.74    4.27
   7  -2  -4   22.61    3.86
   7  -2  -4   21.39    4.34
   7  -1  -4  132.80   15.15
   7  -1  -4  127.44   14.57
  -7   0   4 4989.33  548.42
  -7   0   4 3847.07  423.01
   7   0  -4 4179.24  459.62
   7   0  -4 4186.02  460.29
  -7  -1   4   91.35   10.91
  -7  -1   4  118.80   13.83
   7   1  -4  115.68   13.39
   7   1  -4  102.57   11.90
  -7  -2   4   23.29    4.41
  -7  -2   4   19.90    4.88
   7   2  -4   16.85    3.32
   7   2  -4   25.62    4.44
  -7  -3   4  573.50   63.55
  -7  -3   4  526.39   58.37
   7   3  -4  553.50   61.32
   7   3  -4  502.66   55.59
  -7  -4   4  193.30   22.03
  -7  -4   4  199.13   22.57
   7   4  -4  204.32   23.22
   7   4  -4  196.73   22.10
  -7  -5   4   10.20    3.83
  -7  -5   4   13.22    4.10
   7   5  -4   10.85    4.07
   7   5  -4    7.86    3.36
  -7  -6   4  456.23   50.64
  -7  -6   4  422.33   46.94
   7   6  -4  498.26   55.15
   7   6  -4  408.43   45.49
  -7  -7   4 2039.46  224.38
  -7  -7   4 1787.28  196.86
   7   7  -4 2459.42  270.48
   7   7  -4 1652.38  182.08
  -7  -8   4  240.52   26.98
  -7  -8   4  200.29   22.88
   7   8  -4  189.98   21.79
   7   8  -4  225.71   25.35
  -7  -9   4  536.22   59.52
  -7  -9   4  593.84   65.65
   7   9  -4  519.27   57.76
   7   9  -4  649.43   71.69
  -7 -10   4   24.81    4.41
  -7 -10   4   20.47    4.71
   7  10  -4   22.20    5.52
   7  10  -4   31.42    5.05
  -7 -11   4  846.02   93.41
  -7 -11   4  869.07   95.92
   7  11  -4  793.48   87.82
   7  11  -4  893.81   98.53
  -7 -12   4  312.99   34.98
  -7 -12   4  313.39   34.84
   7  12  -4  320.92   36.17
   7  12  -4  330.88   36.84
  -7 -13   4  807.04   89.04
  -7 -13   4  713.15   78.84
   7  13  -4  739.25   81.89
   7  13  -4  769.08   84.84
  -7 -14   4  454.53   50.33
  -7 -14   4  483.34   53.52
   7  14  -4  511.14   56.94
   7  14  -4  518.25   57.32
  -7 -15   4  752.47   83.01
  -7 -15   4  752.81   82.97
   7  15  -4  753.82   83.35
   7  15  -4  935.84  103.14
  -6  16   4   72.57    9.69
   6 -16  -4   95.72   11.35
   6 -16  -4   90.64   10.64
  -6  15   4   41.01    7.59
   6 -15  -4   39.15    5.59
   6 -15  -4   42.94    6.17
  -6  14   4 2155.04  237.26
  -6  14   4 2083.86  229.71
   6 -14  -4 2033.02  223.67
   6 -14  -4 2079.11  228.69
  -6  13   4  300.61   33.96
  -6  13   4  254.86   29.15
   6 -13  -4  274.11   30.51
   6 -13  -4  274.31   30.64
  -6  12   4  433.52   48.44
  -6  12   4  513.51   57.11
   6 -12  -4  425.04   47.05
   6 -12  -4  489.10   54.10
  -6  11   4   13.86    5.46
  -6  11   4   19.49    5.59
   6 -11  -4    9.90    2.71
   6 -11  -4   17.69    3.80
  -6  10   4  562.32   62.54
  -6  10   4  744.67   82.33
   6 -10  -4  612.82   67.65
   6 -10  -4  579.60   63.99
  -6   9   4  644.00   71.28
  -6   9   4  557.23   61.89
   6  -9  -4  591.13   65.25
   6  -9  -4  606.72   66.91
  -6   8   4 1065.32  117.48
  -6   8   4 1117.18  123.14
   6  -8  -4 1003.29  110.50
   6  -8  -4  998.21  109.96
  -6   7   4 1112.09  122.70
  -6   7   4 1168.70  128.73
   6  -7  -4 1195.13  131.58
   6  -7  -4 1043.62  114.90
  -6   6   4 1092.43  120.43
  -6   6   4 1354.10  149.21
   6  -6  -4 1227.67  135.17
   6  -6  -4 1366.64  150.43
  -6   5   4  200.96   22.57
  -6   5   4  243.13   27.22
   6  -5  -4  203.61   22.74
   6  -5  -4  227.71   25.35
  -6   4   4  364.37   40.40
  -6   4   4  476.56   52.81
   6  -4  -4  389.79   43.15
   6  -4  -4  441.65   48.81
   6  -3  -4  550.79   60.84
   6  -3  -4  476.22   52.60
  -6   2   4  151.48   17.25
  -6   2   4  158.02   17.79
   6  -2  -4  172.80   19.32
   6  -2  -4  181.00   20.24
  -6   1   4   21.12    3.69
  -6   1   4   37.15    5.42
   6  -1  -4   13.56    2.81
   6  -1  -4   20.91    3.36
  -6   0   4 5619.78  617.90
  -6   0   4 6216.33  683.32
  -6  -1   4   17.90    4.14
  -6  -1   4   12.17    3.42
   6   1  -4   14.57    2.81
   6   1  -4   18.10    3.53
  -6  -2   4  181.64   20.54
  -6  -2   4  185.24   21.01
   6   2  -4  197.71   22.27
   6   2  -4  204.28   22.85
  -6  -3   4  502.32   55.69
  -6  -3   4  521.98   57.89
   6   3  -4  504.36   55.72
   6   3  -4  467.75   51.86
  -6  -4   4  332.68   37.11
  -6  -4   4  333.22   37.11
   6   4  -4  284.45   31.83
   6   4  -4  326.95   36.30
  -6  -5   4  203.40   22.95
  -6  -5   4  180.96   20.71
   6   5  -4  212.05   23.76
   6   5  -4  184.76   21.12
  -6  -6   4 1156.49  127.51
  -6  -6   4 1426.98  157.14
   6   6  -4 1035.49  114.29
   6   6  -4 1334.10  146.90
  -6  -7   4 1312.75  144.60
  -6  -7   4 1029.39  113.58
   6   7  -4 1303.94  143.61
   6   7  -4 1011.42  111.65
  -6  -8   4  977.19  107.89
  -6  -8   4 1111.08  122.43
  -6  -9   4  671.12   74.13
  -6  -9   4  678.24   75.15
   6   9  -4  807.72   89.08
   6   9  -4  617.90   68.60
  -6 -10   4  608.07   67.38
  -6 -10   4  684.68   75.69
   6  10  -4  779.92   86.03
   6  10  -4  618.24   68.67
  -6 -11   4   18.78    4.41
  -6 -11   4   15.73    4.17
   6  11  -4   27.90    5.08
   6  11  -4   32.10    6.20
  -6 -12   4  472.50   52.30
  -6 -12   4  501.98   55.69
   6  12  -4  590.45   65.21
   6  12  -4  510.12   56.74
   6  13  -4  306.48   34.20
   6  13  -4  376.91   42.50
  -6 -14   4 2270.96  249.77
  -6 -14   4 2448.57  269.40
   6  14  -4 2292.99  252.52
   6  14  -4 2368.92  260.55
  -6 -15   4   39.66    5.32
  -6 -15   4   38.17    5.69
   6  15  -4   37.96    6.58
   6  15  -4   42.13    6.10
  -6 -16   4  100.26   11.49
  -6 -16   4   83.79   10.07
   6  16  -4   93.79   11.19
   6  16  -4   98.36   12.34
  -5  16   4   20.34    7.08
   5 -16  -4   16.85    3.80
   5 -16  -4   11.56    3.73
  -5  15   4  191.74   22.54
  -5  15   4  194.25   23.08
   5 -15  -4  166.39   18.91
   5 -15  -4  203.47   22.85
  -5  14   4  263.53   30.20
  -5  14   4  267.57   30.57
   5 -14  -4  226.82   25.42
   5 -14  -4  260.48   29.01
  -5  13   4   53.01    9.12
  -5  13   4   49.11    7.90
   5 -13  -4   41.52    5.56
   5 -13  -4   45.45    6.34
  -5  12   4   30.61    6.47
  -5  12   4   46.77    8.07
   5 -12  -4   39.18    5.15
   5 -12  -4   36.57    5.25
  -5  11   4  504.36   56.20
  -5  11   4  666.71   73.89
   5 -11  -4  541.30   59.76
   5 -11  -4  588.42   64.98
  -5  10   4  310.38   34.88
  -5  10   4  248.96   28.23
   5 -10  -4  308.17   34.20
   5 -10  -4  266.24   29.59
  -5   9   4   25.86    5.39
  -5   9   4   26.54    5.15
   5  -9  -4   25.76    3.63
   5  -9  -4   31.42    4.71
  -5   8   4  683.32   75.52
  -5   8   4  499.95   55.59
   5  -8  -4  693.83   76.50
   5  -8  -4  627.06   69.15
  -5   7   4 8673.71  953.46
  -5   7   4 5873.99  645.70
   5  -7  -4 6846.77  752.47
  -5   6   4  104.46   12.07
  -5   6   4  124.67   14.30
   5  -6  -4  121.72   13.69
   5  -6  -4  116.60   13.12
  -5   5   4 1620.85  178.39
  -5   5   4 1578.49  173.85
   5  -5  -4 1839.48  202.35
   5  -5  -4 1346.64  148.19
  -5   4   4 1976.07  217.44
  -5   4   4 2361.46  259.80
   5  -4  -4 2392.64  263.13
   5  -4  -4 2040.81  224.49
  -5   3   4  376.57   41.62
  -5   3   4  570.11   62.98
   5  -3  -4  498.93   55.01
   5  -3  -4  402.33   44.37
  -5   2   4   48.67    5.90
  -5   2   4   48.81    6.13
   5  -2  -4   51.22    6.07
   5  -2  -4   60.10    6.91
  -5   1   4 4145.35  455.89
  -5   1   4 4663.94  512.83
  -5   0   4  830.09   91.52
  -5   0   4  857.20   94.43
   5   0  -4  816.53   89.96
   5   0  -4  768.74   84.64
  -5  -1   4 4575.81  503.00
  -5  -1   4 4162.30  457.92
   5   1  -4 3897.92  428.43
  -5  -2   4   49.89    6.44
  -5  -2   4   59.28    7.32
   5   2  -4   46.20    5.90
   5   2  -4   52.67    6.30
  -5  -3   4  476.90   52.74
  -5  -3   4  379.28   42.06
   5   3  -4  420.30   46.44
   5   3  -4  437.92   48.54
  -5  -4   4 2533.98  278.72
  -5  -4   4 1921.50  211.47
   5   4  -4 1794.74  197.57
   5   4  -4 2074.37  228.11
  -5  -5   4 1235.81  136.16
  -5  -5   4 1662.55  182.93
   5   5  -4 1652.72  181.81
   5   5  -4 1282.58  141.34
  -5  -6   4  125.85   14.44
  -5  -6   4  116.16   13.83
   5   6  -4  118.53   14.03
   5   6  -4  164.73   18.57
  -5  -7   4 7141.66  785.01
  -5  -7   4 7748.38  851.44
   5   7  -4 6714.58  738.23
  -5  -8   4  658.58   72.74
  -5  -8   4  709.08   78.47
   5   8  -4  712.81   78.64
   5   8  -4  614.51   68.16
  -5  -9   4   32.23    5.52
  -5  -9   4   34.40    4.98
   5   9  -4   51.45    7.59
   5   9  -4   32.71    5.15
  -5 -10   4  284.01   31.73
  -5 -10   4  310.55   34.84
   5  10  -4  291.73   32.51
   5  10  -4  313.16   35.32
  -5 -11   4  545.03   60.27
  -5 -11   4  612.14   67.79
   5  11  -4  632.14   69.86
   5  11  -4  621.97   69.15
  -5 -12   4   40.30    5.39
  -5 -12   4   42.03    6.20
   5  12  -4   49.93    7.08
   5  12  -4   73.89   10.00
  -5 -13   4   48.16    6.34
  -5 -13   4   52.77    7.15
   5  13  -4   48.64    7.66
   5  13  -4   53.35    7.19
  -5 -14   4  284.55   31.66
  -5 -14   4  289.23   32.47
   5  14  -4  297.26   33.18
   5  14  -4  276.51   31.42
  -5 -15   4  230.45   25.76
  -5 -15   4  190.93   21.76
   5  15  -4  222.96   25.66
   5  15  -4  244.76   27.56
  -5 -16   4   13.39    3.39
  -5 -16   4   14.10    4.20
   5  16  -4   13.19    3.86
   5  16  -4   19.86    5.52
  -4  17   4  508.76   56.81
  -4  17   4  489.78   54.71
   4 -17  -4  625.36   68.98
   4 -17  -4  522.66   57.72
  -4  16   4  133.48   16.41
  -4  16   4  155.61   18.74
   4 -16  -4  138.02   15.83
   4 -16  -4  154.80   17.56
  -4  15   4  730.77   81.14
  -4  15   4  675.53   75.08
   4 -15  -4  664.00   73.28
   4 -15  -4  603.33   66.64
  -4  14   4   87.08   11.66
  -4  14   4  100.19   13.63
   4 -14  -4   86.60   10.51
   4 -14  -4   92.94   10.88
  -4  13   4  880.59   97.48
  -4  13   4 1052.10  116.29
   4 -13  -4  924.31  101.85
   4 -13  -4  955.50  105.28
  -4  12   4  409.45   45.79
  -4  12   4  471.14   52.60
   4 -12  -4  470.12   52.03
   4 -12  -4  403.69   44.67
  -4  11   4 1177.17  129.95
  -4  11   4 1655.77  182.56
   4 -11  -4 1311.73  144.36
   4 -11  -4 1423.25  156.63
  -4  10   4  293.12   32.95
  -4  10   4  410.81   45.96
   4 -10  -4  307.83   34.10
   4 -10  -4  333.63   36.98
   4  -9  -4  566.05   62.43
   4  -9  -4  617.90   68.16
   4  -8  -4  383.35   42.37
   4  -8  -4  408.09   45.08
   4  -7  -4 3575.91  393.18
   4  -7  -4 4182.63  459.95
   4  -6  -4  105.68   11.83
   4  -6  -4  124.67   13.96
  -4   5   4   21.18    3.25
  -4   5   4   20.00    3.25
   4  -5  -4   19.02    2.54
   4  -5  -4   19.29    2.64
  -4   4   4   54.67    6.27
  -4   4   4   62.94    7.15
   4  -4  -4   80.40    8.98
   4  -4  -4  105.82   11.76
  -4   3   4  803.65   88.74
  -4   3   4  586.04   64.74
   4  -3  -4  828.39   91.45
   4  -3  -4  779.58   86.03
  -4   2   4    7.15    1.53
  -4   2   4    9.22    1.80
   4  -2  -4    7.97    1.22
   4  -2  -4    9.02    1.49
  -4   1   4  680.95   75.01
  -4   1   4  908.72  100.06
   4  -1  -4  800.26   88.09
   4  -1  -4  957.19  105.38
  -4   0   4 4060.61  446.40
  -4   0   4 5260.49  578.25
  -4  -1   4 1211.74  133.38
  -4  -1   4  917.20  101.01
   4   1  -4 1136.84  125.04
   4   1  -4  955.50  105.18
  -4  -2   4    5.05    2.41
  -4  -2   4    5.97    2.20
   4   2  -4    7.86    2.00
   4   2  -4    9.19    2.37
  -4  -3   4  658.58   72.70
  -4  -3   4  847.37   93.41
   4   3  -4  611.13   67.48
   4   3  -4  871.44   95.92
  -4  -4   4  108.60   12.44
  -4  -4   4   81.28    9.69
  -4  -5   4   14.07    3.46
  -4  -5   4   17.15    3.73
   4   5  -4   20.68    3.56
   4   5  -4   16.91    3.86
  -4  -6   4  102.13   12.17
  -4  -6   4  116.06   13.32
   4   6  -4   98.77   11.93
   4   6  -4  131.48   14.95
  -4  -7   4 3521.68  387.08
  -4  -7   4 3748.78  412.16
   4   7  -4 4121.62  453.18
   4   7  -4 3440.33  378.61
  -4  -8   4  416.23   46.16
  -4  -8   4  411.82   45.93
   4   8  -4  379.62   42.40
   4   8  -4  374.20   41.49
  -4  -9   4  617.90   68.33
  -4  -9   4  607.06   67.28
   4   9  -4  596.21   66.20
   4   9  -4  580.28   64.13
  -4 -10   4  406.74   45.35
  -4 -10   4  315.97   35.15
   4  10  -4  331.97   37.35
   4  10  -4  359.29   39.89
  -4 -11   4 1345.97  148.19
  -4 -11   4 1464.60  161.41
   4  11  -4 1530.36  168.46
   4  11  -4 1345.97  148.56
  -4 -12   4  439.28   48.67
  -4 -12   4  550.45   61.08
   4  12  -4  505.71   56.03
   4  12  -4  472.16   52.77
  -4 -13   4 1050.40  115.75
  -4 -13   4  976.85  107.75
   4  13  -4 1141.58  125.75
   4  13  -4 1101.25  121.75
  -4 -14   4  129.99   15.25
  -4 -14   4   99.01   11.56
   4  14  -4   89.21   10.81
   4  14  -4   97.89   12.74
  -4 -15   4  715.52   78.98
  -4 -15   4  801.28   88.57
   4  15  -4  729.76   80.53
   4  15  -4  755.52   83.82
  -4 -16   4  173.81   19.93
  -4 -16   4  164.80   18.71
   4  16  -4  169.75   19.32
   4  16  -4  189.57   22.24
  -4 -17   4  605.70   66.74
  -4 -17   4  694.51   76.67
   4  17  -4  691.12   76.77
   4  17  -4  761.28   83.96
  -3  17   4    8.24    7.97
  -3  17   4   13.59    6.75
   3 -17  -4   10.64    2.68
   3 -17  -4   10.64    3.53
  -3  16   4  159.07   19.29
  -3  16   4  157.88   19.08
   3 -16  -4  215.47   24.10
   3 -16  -4  158.87   18.10
  -3  15   4   17.35    6.20
  -3  15   4   18.85    7.46
   3 -15  -4   22.13    4.03
   3 -15  -4   22.20    4.54
  -3  14   4 3481.01  383.35
  -3  14   4 3180.36  349.80
   3 -14  -4 3203.41  352.17
   3 -14  -4 3204.43  352.17
  -3  13   4  101.04   13.35
  -3  13   4   97.58   12.34
   3 -13  -4   88.47   10.37
   3 -13  -4   92.94   10.95
  -3  12   4  234.42   26.78
  -3  12   4  321.19   36.50
   3 -12  -4  266.82   29.73
   3 -12  -4  260.11   28.95
  -3  11   4   16.91    4.88
  -3  11   4   41.11    8.10
   3 -11  -4   24.00    3.56
   3 -11  -4   21.32    3.73
  -3  10   4 1095.82  121.11
  -3  10   4  749.76   82.91
   3 -10  -4  803.65   88.53
   3 -10  -4  776.87   85.62
   3  -9  -4  295.97   32.78
   3  -9  -4  333.63   36.88
   3  -8  -4  444.02   49.01
   3  -8  -4  593.16   65.35
   3  -7  -4  220.99   24.51
   3  -7  -4  263.63   29.15
   3  -6  -4 2437.38  268.04
   3  -6  -4 3111.21  342.00
   3  -5  -4  188.02   20.78
   3  -5  -4  216.11   23.90
  -3   0   4 4616.49  507.75
  -3  -1   4    3.49    1.83
  -3  -1   4    5.73    2.14
   3   1  -4    4.85    1.46
   3   1  -4    2.64    1.53
  -3  -6   4 2422.47  266.48
  -3  -6   4 1755.42  193.23
   3   6  -4 1687.63  185.88
   3   6  -4 2469.58  271.53
  -3  -7   4  220.79   24.74
  -3  -7   4  172.46   19.66
   3   7  -4  212.18   24.17
   3   7  -4  224.21   25.05
  -3  -8   4  505.71   56.13
  -3  -8   4  520.63   57.59
   3   8  -4  517.24   57.18
   3   8  -4  454.53   50.71
  -3  -9   4  290.07   32.67
  -3  -9   4  333.66   37.15
   3   9  -4  288.89   32.71
   3   9  -4  324.00   35.96
  -3 -10   4  749.42   82.67
   3  10  -4  828.05   91.28
   3  10  -4  866.35   96.13
  -3 -11   4   35.42    6.10
  -3 -11   4   21.39    3.59
   3  11  -4   25.90    5.93
   3  11  -4   27.22    4.51
  -3 -12   4  321.19   36.00
  -3 -12   4  253.43   28.30
   3  12  -4  271.19   30.34
   3  12  -4  252.58   28.95
  -3 -13   4  109.07   12.74
  -3 -13   4   99.18   12.30
   3  13  -4  101.01   13.15
   3  13  -4   92.60   11.05
  -3 -14   4 3626.76  398.94
  -3 -14   4 2991.23  328.88
   3  14  -4 3423.39  376.91
   3  14  -4 3670.82  403.35
  -3 -15   4   20.81    3.86
  -3 -15   4   32.64    6.20
   3  15  -4   18.13    4.44
   3  15  -4   16.34    6.54
   3  16  -4  182.56   20.68
   3  16  -4  208.56   24.44
  -3 -17   4   13.19    4.37
  -3 -17   4    9.59    2.78
   3  17  -4   13.56    6.27
   3  17  -4    8.68    3.83
  -2  17   4  212.79   24.51
  -2  17   4  297.06   34.20
   2 -17  -4  219.30   24.47
   2 -17  -4  223.81   24.98
  -2  16   4   -0.85    5.36
  -2  16   4   13.25    7.52
   2 -16  -4    1.97    3.32
   2 -16  -4    0.54    3.02
  -2  15   4  183.88   21.93
  -2  15   4  151.00   17.93
   2 -15  -4  188.29   21.25
   2 -15  -4  154.05   17.46
  -2  14   4  262.41   29.83
  -2  14   4  301.63   34.61
   2 -14  -4  254.65   28.37
   2 -14  -4  267.16   29.73
  -2  13   4  180.76   21.69
  -2  13   4  137.04   16.24
   2 -13  -4  153.10   17.39
   2 -13  -4  146.46   16.54
  -2  12   4  423.01   47.55
  -2  12   4  298.51   33.62
   2 -12  -4  334.37   37.08
   2 -12  -4  312.10   34.61
  -2  11   4  780.60   86.26
  -2  11   4 1134.12  125.34
   2 -11  -4  954.82  105.14
   2 -11  -4  731.79   80.67
  -2  10   4  106.06   13.19
  -2  10   4   74.40    9.76
   2 -10  -4   82.23    9.49
   2 -10  -4   72.70    8.51
  -2   9   4    4.85    4.34
  -2   9   4    0.64    3.93
   2  -9  -4    4.14    2.20
   2  -9  -4    1.97    1.93
  -2   8   4 1760.50  193.71
  -2   8   4 2126.23  234.04
   2  -8  -4 1374.44  151.24
  -2   7   4 6772.20  744.33
  -2   7   4 8039.87  883.64
   2  -7  -4 5636.72  619.60
  -2   6   4  103.45   11.96
  -2   6   4   99.89   11.46
   2  -6  -4   85.62    9.63
   2  -6  -4   80.40    9.08
  -2   5   4  754.50   83.14
  -2   5   4  564.01   62.20
   2  -5  -4  595.53   65.55
   2  -5  -4  529.10   58.30
   2  -4  -4 1809.31  199.20
   2  -3  -4  227.74   25.39
   2  -3  -4  190.66   21.25
  -2   1   4 1723.56  189.95
  -2   0   4 4799.52  527.74
  -2  -1   4 5355.40  588.75
  -2  -1   4 5582.49  613.84
   2   1  -4 5155.42  566.72
  -2  -2   4    0.34    2.20
  -2  -2   4    4.47    2.47
   2   2  -4    4.10    1.66
   2   2  -4    3.83    2.14
  -2  -3   4  123.58   14.03
  -2  -3   4  164.70   18.57
   2   3  -4  167.78   18.68
   2   3  -4  136.22   15.46
  -2  -5   4  335.46   37.35
  -2  -5   4  399.62   44.30
   2   6  -4   77.99    9.19
   2   6  -4   62.40    8.07
  -2  -8   4 1038.20  114.56
  -2  -8   4 1559.51  171.64
  -2  -9   4    3.93    5.02
  -2  -9   4    0.75    2.71
   2   9  -4    2.17    2.78
   2   9  -4    5.02    4.61
  -2 -10   4   72.84    9.59
  -2 -10   4   74.77    8.81
   2  10  -4   82.30    9.66
   2  10  -4   64.23    9.12
  -2 -11   4  891.78   98.63
  -2 -11   4  728.06   80.26
   2  11  -4  779.24   85.96
   2  11  -4  654.51   72.84
  -2 -12   4  287.80   32.40
  -2 -12   4  304.34   33.86
   2  12  -4  309.66   34.51
   2  12  -4  287.56   32.81
   2  13  -4  132.90   15.29
   2  13  -4  163.17   19.66
  -2 -14   4  324.04   36.30
  -2 -14   4  270.18   30.03
   2  14  -4  234.59   26.30
   2  14  -4  262.92   30.34
  -2 -15   4  169.07   19.56
  -2 -15   4  203.71   22.81
   2  15  -4  197.30   22.27
   2  15  -4  168.76   20.27
  -2 -16   4    2.85    4.00
  -2 -16   4    5.42    2.91
   2  16  -4    7.29    4.07
   2  16  -4    5.12    6.30
  -2 -17   4  305.73   34.17
  -2 -17   4  282.92   31.42
   2  17  -4  272.28   30.44
   2  17  -4  269.19   30.74
  -1  17   4  553.17   61.93
  -1  17   4  439.62   49.01
   1 -17  -4  461.65   50.98
   1 -17  -4  607.40   67.01
  -1  16   4   26.64    6.30
  -1  16   4   32.78    8.24
   1 -16  -4   31.18    4.98
   1 -16  -4   28.64    4.44
  -1  15   4  551.13   61.72
  -1  15   4  454.53   50.64
   1 -15  -4  554.86   61.32
   1 -15  -4  558.93   61.72
  -1  14   4    3.80    4.27
  -1  14   4    5.90    7.19
   1 -14  -4    4.68    3.05
   1 -14  -4    7.63    3.05
  -1  13   4  680.95   75.82
  -1  13   4  491.48   54.60
   1 -13  -4  582.31   64.33
  -1  12   4  353.18   39.49
  -1  12   4  409.45   46.16
   1 -12  -4  396.23   43.83
   1 -12  -4  374.54   41.52
  -1  11   4  945.67  104.36
  -1  11   4 1238.18  136.83
   1 -11  -4 1149.38  126.60
   1 -11  -4 1064.64  117.21
  -1  10   4  752.81   83.31
  -1  10   4  748.06   82.97
   1 -10  -4  708.06   78.09
   1 -10  -4  645.02   71.11
  -1   9   4  222.76   25.15
  -1   9   4  208.15   23.86
   1  -9  -4  180.86   20.17
   1  -9  -4  182.32   20.40
  -1   8   4  530.79   58.71
  -1   8   4  532.83   59.18
   1  -8  -4  500.97   55.28
   1  -8  -4  468.09   51.62
  -1   7   4 6484.10  712.47
  -1   7   4 7016.25  771.45
  -1   6   4    5.02    3.02
  -1   6   4    3.12    2.88
   1  -6  -4    5.49    1.97
   1  -6  -4    3.46    1.53
  -1   5   4  110.19   12.44
  -1   5   4  128.19   14.54
   1  -5  -4  130.26   14.54
   1  -5  -4  126.80   14.13
   1  -4  -4   48.74    5.66
   1  -4  -4   37.11    4.44
  -1   3   4  674.85   74.37
  -1   3   4  879.91   96.91
   1  -3  -4 1003.97  110.46
   1  -3  -4  695.18   76.53
  -1   2   4  126.19   14.24
  -1   2   4   87.72   10.00
   1  -2  -4  110.16   12.30
   1  -2  -4   87.31    9.76
   1  -1  -4 1824.90  200.69
   1   0  -4 3261.03  358.61
  -1  -1   4 3453.89  379.62
  -1  -1   4 4074.17  448.09
   1   1  -4 3230.19  354.88
   1   1  -4 3065.80  337.08
  -1  -2   4  116.43   13.35
  -1  -2   4  107.58   12.47
   1   2  -4  113.62   12.74
   1   2  -4  105.58   12.27
  -1  -3   4 1211.74  133.48
  -1  -3   4 1112.43  122.56
   1   3  -4 1105.31  121.61
   1   3  -4 1004.65  110.80
  -1  -4   4   56.44    7.02
  -1  -4   4   47.66    6.47
   1   4  -4   68.98    8.64
   1   4  -4   56.81    6.81
  -1  -5   4  164.29   18.68
  -1  -5   4  116.16   13.66
   1   5  -4  165.44   18.51
   1   5  -4  117.58   13.90
  -1  -6   4    5.25    3.25
  -1  -6   4    2.58    3.76
   1   6  -4    9.97    2.51
   1   6  -4    5.97    4.03
  -1  -8   4  364.37   40.74
  -1  -8   4  519.61   57.49
   1   8  -4  349.12   39.25
   1   8  -4  522.32   57.72
  -1  -9   4  131.44   15.80
  -1  -9   4  198.73   22.37
  -1 -10   4  528.42   58.77
  -1 -10   4  651.12   71.93
   1  10  -4  453.51   50.77
   1  10  -4  611.80   67.52
   1  11  -4  821.61   91.14
   1  11  -4 1044.98  115.14
  -1 -12   4  311.19   35.05
  -1 -12   4  349.46   38.81
   1  12  -4  347.76   38.64
   1  12  -4  256.72   29.45
  -1 -13   4  447.41   49.42
  -1 -13   4  534.18   59.38
  -1 -14   4   12.00    4.71
  -1 -14   4    2.14    2.17
   1  14  -4    9.76    3.69
   1  14  -4    0.64    6.51
  -1 -15   4  565.71   62.71
  -1 -15   4  510.80   56.40
   1  15  -4  453.18   50.16
   1  15  -4  504.02   56.47
  -1 -16   4   18.51    4.98
  -1 -16   4   30.10    4.30
   1  16  -4   22.24    4.44
   1  16  -4   10.51    6.64
  -1 -17   4  635.87   70.16
  -1 -17   4  520.29   57.55
   1  17  -4  473.17   52.88
   1  17  -4  547.06   60.50
   0  17   4   54.40    9.56
   0  17   4   42.37    7.02
   0 -17  -4   35.69    4.98
   0 -17  -4   31.32    4.37
   0  16   4  228.76   26.81
   0  16   4  230.62   26.27
   0 -16  -4  238.65   26.61
   0 -16  -4  237.37   26.47
   0  15   4  124.80   16.00
   0  15   4  133.27   15.76
   0 -15  -4  144.16   16.37
   0 -15  -4  142.56   16.13
   0  14   4 2169.27  239.09
   0  14   4 2280.45  250.96
   0 -14  -4 2408.91  264.92
   0 -14  -4 2352.99  258.75
   0  13   4   23.15    5.22
   0  13   4   23.66    6.61
   0 -13  -4   21.79    4.07
   0 -13  -4   16.30    3.25
   0  12   4  198.62   22.57
   0  12   4  200.83   23.56
   0 -12  -4  190.15   21.39
   0 -12  -4  177.13   19.86
   0  11   4   65.59    8.71
   0  11   4   64.54    9.69
   0 -11  -4   44.00    5.73
   0 -11  -4   49.69    6.24
   0  10   4  842.29   93.08
   0  10   4  612.48   68.20
   0 -10  -4  693.83   76.50
   0 -10  -4  808.05   89.11
   0   9   4    4.68    5.49
   0   9   4    3.53    3.93
   0  -9  -4    7.22    2.58
   0  -9  -4    7.08    2.44
   0   8   4  279.23   31.22
   0   8   4  233.23   26.61
   0  -8  -4  214.05   23.79
   0  -8  -4  255.97   28.51
   0   7   4   47.35    6.95
   0   7   4   62.81    7.90
   0  -7  -4   54.50    6.54
   0  -7  -4   62.40    7.49
   0   6   4 2969.87  326.81
   0   6   4 2513.65  276.48
   0  -6  -4 2544.49  279.73
   0  -6  -4 2644.48  290.78
   0   5   4   12.13    3.05
   0   5   4   14.27    3.83
   0  -5  -4   14.00    2.64
   0  -5  -4   20.13    3.15
   0   2   4  139.65   15.80
   0   2   4  120.26   13.76
   0  -2  -4  128.12   14.30
   0  -2  -4  168.36   18.74
   0   1   4    2.47    2.47
   0   1   4   12.17    3.12
   0  -1  -4    8.58    2.17
   0  -1  -4    4.17    1.73
   0   0   4 4741.90  521.30
   0   0   4 7053.53  775.18
   0  -1   4   14.74    3.90
   0  -1   4    3.59    3.39
   0   1  -4    4.75    2.17
   0   1  -4    7.12    2.75
   0  -2   4  270.62   30.30
   0  -2   4  203.51   22.98
   0   2  -4  217.44   24.47
   0   2  -4  210.49   23.39
   0  -3   4  316.10   35.28
   0  -3   4  352.51   39.22
   0   3  -4  308.61   34.51
   0   3  -4  382.67   42.30
   0  -4   4  133.04   15.52
   0  -4   4  185.37   21.08
   0   4  -4  137.07   16.03
   0   4  -4  166.56   18.68
   0  -5   4   20.03    4.03
   0  -5   4   14.37    4.54
   0   5  -4   24.64    3.90
   0   5  -4   18.95    5.08
   0  -6   4 2788.20  306.75
   0  -6   4 3178.33  349.46
   0   6  -4 3193.92  351.15
   0   6  -4 2587.54  284.89
   0  -7   4   55.69    8.10
   0  -7   4   74.33    9.05
   0   7  -4   66.23    9.35
   0   7  -4   86.74   10.20
   0  -8   4  253.06   28.71
   0  -8   4  274.82   30.71
   0   8  -4  268.38   29.90
   0   8  -4  190.52   22.17
   0  -9   4   12.74    3.32
   0  -9   4   30.44    6.34
   0   9  -4    4.85    2.81
   0   9  -4   15.56    5.25
   0 -10   4  859.24   95.11
   0 -10   4  756.87   83.55
   0  10  -4  627.39   69.89
   0  10  -4  802.63   88.50
   0 -11   4   49.72    7.76
   0 -11   4   46.64    6.30
   0  11  -4   39.35    7.46
   0  11  -4   45.15    6.13
   0  12  -4  196.52   22.10
   0  12  -4  176.05   20.91
   0 -14   4 2461.79  270.72
   0 -14   4 2958.69  325.53
   0  14  -4 2239.44  246.82
   0  14  -4 2606.52  286.65
   0 -15   4  157.34   18.44
   0 -15   4  133.44   15.15
   0  15  -4  128.87   14.88
   0  15  -4  147.95   18.00
   0 -16   4  254.45   28.34
   0 -16   4  255.06   28.81
   0  16  -4  194.96   22.81
   0  16  -4  233.98   26.20
   0 -17   4   46.10    6.81
   0 -17   4   40.10    5.12
   0  17  -4   31.73    6.41
   0  17  -4   32.30    5.63
   1  16   4   20.51    7.15
   1  16   4   27.42    6.10
  -1 -16  -4   25.90    4.17
  -1 -16  -4   27.22    4.00
   1  15   4  134.12   15.93
   1  15   4  154.22   18.88
  -1 -15  -4  182.12   20.47
  -1 -15  -4  133.44   15.15
   1  14   4  347.76   38.91
   1  14   4  313.70   35.83
  -1 -14  -4  339.63   37.66
  -1 -14  -4  431.82   47.86
   1  13   4  333.73   37.39
   1  13   4  288.99   33.01
  -1 -13  -4  303.12   33.66
  -1 -13  -4  336.95   37.42
   1  12   4  554.52   61.42
   1  12   4  392.50   44.23
  -1 -12  -4  597.57   65.96
  -1 -12  -4  467.41   51.62
   1  11   4  432.84   48.23
   1  11   4  541.64   60.60
  -1 -11  -4  439.28   48.67
  -1 -11  -4  375.22   41.56
   1  10   4   48.61    7.02
   1  10   4   36.91    7.42
  -1 -10  -4   45.42    5.86
  -1 -10  -4   59.01    7.12
   1   9   4  249.87   28.06
   1   9   4  243.70   28.03
  -1  -9  -4  250.38   27.93
  -1  -9  -4  214.35   23.93
   1   8   4 1754.74  193.10
   1   8   4 1684.24  185.74
  -1  -8  -4 1532.73  168.63
  -1  -8  -4 1822.53  200.49
   1   7   4 3874.19  426.06
   1   7   4 3623.37  398.60
  -1  -7  -4 4006.38  440.29
  -1  -7  -4 3535.24  388.44
  -1  -6  -4  154.76   17.35
  -1  -6  -4  153.65   17.39
   1   5   4   20.88    3.93
   1   5   4   29.79    5.15
  -1  -5  -4   32.57    4.44
  -1  -5  -4   21.76    3.46
  -1  -4  -4 1301.90  143.27
  -1  -4  -4  906.01   99.79
   1   3   4    7.39    3.49
   1   3   4   -1.25    2.51
  -1  -3  -4    4.14    2.30
  -1  -3  -4    1.46    2.07
   1   2   4    6.44    2.91
   1   2   4    1.97    2.81
  -1  -2  -4    4.10    1.90
  -1  -2  -4    5.52    2.24
   1   1   4 1111.41  122.53
   1   1   4 1042.61  115.04
  -1  -1  -4 1161.58  127.85
  -1  -1  -4 1143.28  125.89
   1   0   4 6412.92  705.01
   1   0   4 8117.83  892.45
  -1   0  -4 6419.70  705.35
   1  -1   4 1638.14  180.42
   1  -1   4 1358.17  149.65
  -1   1  -4 1448.67  159.44
  -1   1  -4 1469.34  161.68
   1  -2   4   10.64    3.93
   1  -2   4    7.83    4.71
  -1   2  -4    5.02    3.02
  -1   2  -4    5.90    2.91
   1  -3   4   11.52    4.34
   1  -3   4    7.22    4.44
  -1   3  -4   12.74    2.98
  -1   3  -4    3.80    3.97
   1  -4   4 2152.67  236.93
   1  -4   4 1741.86  191.85
  -1   4  -4 1543.24  170.02
  -1   4  -4 1585.94  174.49
   1  -5   4   40.17    5.97
   1  -5   4   28.13    5.56
  -1   5  -4   30.84    4.44
  -1   5  -4   38.34    6.54
   1  -6   4  218.28   24.68
   1  -6   4  194.69   22.30
  -1   6  -4  190.42   22.10
  -1   6  -4  252.14   28.10
   1  -7   4 4555.48  500.97
   1  -7   4 4331.77  476.56
  -1   7  -4 3704.71  407.42
  -1   7  -4 4497.86  494.53
   1  -8   4 1842.87  202.83
   1  -8   4 2001.16  220.38
  -1   8  -4 1988.28  218.72
  -1   8  -4 1799.14  198.35
   1  -9   4  272.24   30.47
   1  -9   4  257.26   29.45
  -1   9  -4  241.98   27.76
  -1   9  -4  281.50   31.39
   1 -10   4   52.10    6.78
   1 -10   4   57.05    9.15
  -1  10  -4   56.30    7.15
  -1  10  -4   49.89    8.00
   1 -11   4  400.30   44.40
   1 -11   4  527.40   58.77
  -1  11  -4  384.71   43.42
  -1  11  -4  446.40   49.42
   1 -12   4  561.30   61.96
   1 -12   4  626.04   69.59
  -1  12  -4  550.11   60.77
  -1  12  -4  543.00   60.77
   1 -13   4  325.43   36.17
   1 -13   4  354.54   39.86
  -1  13  -4  342.00   38.00
  -1  13  -4  332.81   37.73
   1 -14   4  411.82   46.00
   1 -14   4  464.36   51.35
  -1  14  -4  367.76   40.84
  -1  14  -4  360.30   40.81
   1 -15   4  137.31   15.59
   1 -15   4  155.31   17.96
  -1  15  -4  150.02   17.12
  -1  15  -4  150.09   18.07
   1 -16   4   39.32    5.42
   1 -16   4   27.52    5.22
  -1  16  -4   27.52    4.71
  -1  16  -4   27.05    6.30
   2  16   4    8.68    4.75
   2  16   4   15.80    7.08
  -2 -16  -4    8.58    2.64
  -2 -16  -4   10.64    3.22
   2  15   4  346.07   38.64
   2  15   4  265.40   30.57
  -2 -15  -4  318.37   35.28
  -2 -15  -4  351.83   39.01
   2  14   4   45.96    7.08
   2  14   4   40.06    7.76
  -2 -14  -4   40.98    5.42
  -2 -14  -4   53.89    7.02
   2  13   4  131.82   15.59
   2  13   4  103.48   13.76
  -2 -13  -4  136.29   15.49
  -2 -13  -4  145.75   16.51
  -2 -12  -4  160.22   18.10
  -2 -12  -4  179.20   20.17
   2  11   4  676.20   74.84
   2  11   4  653.83   72.77
  -2 -11  -4  644.34   71.08
  -2 -11  -4  720.27   79.48
   2  10   4  423.01   47.05
   2  10   4  386.74   43.59
  -2 -10  -4  376.91   41.76
  -2 -10  -4  394.88   43.72
   2   9   4    3.90    3.63
   2   9   4    6.00    5.19
  -2  -9  -4    4.17    2.61
  -2  -9  -4    3.39    2.44
   2   8   4  123.82   14.37
   2   8   4  115.62   14.41
  -2  -8  -4  116.87   13.39
  -2  -8  -4  109.68   12.58
   2   7   4 5189.31  570.79
   2   7   4 7104.37  781.28
  -2  -7  -4 6050.24  664.68
  -2  -7  -4 5674.01  623.67
   2   6   4   28.95    5.08
   2   6   4   37.35    6.34
  -2  -6  -4   41.25    5.46
  -2  -6  -4   29.25    4.44
   2   4   4    9.42    4.54
   2   4   4    5.49    4.20
  -2  -4  -4    2.34    2.24
  -2  -4  -4    5.22    2.61
   2   3   4  551.81   61.28
   2   3   4  461.65   51.22
  -2  -3  -4  625.02   68.94
  -2  -3  -4  636.21   70.16
   2   2   4   27.66    4.85
   2   2   4   19.69    4.37
   2   0   4  943.30  104.26
   2   0   4 1156.49  127.58
  -2   0  -4 1089.72  119.99
  -2   0  -4 1138.53  125.45
   2  -1   4 3311.53  364.37
   2  -1   4 3643.70  400.64
  -2   1  -4 4121.62  453.18
  -2   1  -4 3460.67  380.30
   2  -2   4   24.74    5.08
   2  -2   4   29.15    5.36
  -2   2  -4   39.89    5.76
  -2   2  -4   33.76    4.81
  -2   3  -4  978.55  108.06
  -2   3  -4  889.40   98.06
   2  -4   4    3.05    3.86
   2  -4   4    8.71    4.78
  -2   4  -4    7.86    3.22
  -2   4  -4    4.14    4.85
   2  -5   4 1226.32  135.34
   2  -5   4 1125.31  124.09
  -2   5  -4 1135.14  125.00
  -2   5  -4 1104.64  121.95
   2  -6   4   42.61    7.08
   2  -6   4   46.54    6.75
  -2   6  -4   46.81    6.44
  -2   6  -4   48.23    7.42
   2  -7   4 8141.56  894.83
   2  -7   4 8456.78  929.40
  -2   7  -4 7439.93  817.88
  -2   7  -4 8931.31  981.60
   2  -8   4  110.53   13.08
   2  -8   4  155.24   18.68
  -2   8  -4  128.09   15.42
  -2   8  -4  141.68   16.17
  -2   9  -4    2.64    3.12
  -2   9  -4   12.85    5.93
   2 -10   4  409.45   45.39
   2 -10   4  529.44   59.04
  -2  10  -4  487.41   53.93
  -2  10  -4  478.94   53.76
   2 -11   4  920.92  101.96
   2 -11   4  768.06   84.74
  -2  11  -4  820.26   90.47
  -2  11  -4  906.69  100.63
   2 -12   4  181.30   20.47
   2 -12   4  196.42   22.68
   2 -13   4  140.83   16.07
   2 -13   4  148.43   17.66
   2 -14   4   47.08    7.39
   2 -14   4   50.20    6.68
  -2  14  -4   75.28   10.61
  -2  14  -4   53.42    7.12
   2 -15   4  395.21   43.83
   2 -15   4  390.81   43.52
  -2  15  -4  394.20   44.33
  -2  15  -4  417.25   46.23
   2 -16   4    9.63    4.51
   2 -16   4    7.29    2.81
  -2  16  -4    9.12    5.56
  -2  16  -4   13.39    3.76
   3  15   4  123.99   14.68
   3  15   4  117.51   15.12
  -3 -15  -4  124.26   14.07
  -3 -15  -4  131.44   14.91
   3  14   4 1421.21  156.53
   3  14   4 1319.87  145.88
  -3 -14  -4 1499.51  165.07
  -3 -14  -4 1369.69  150.73
   3  13   4  177.95   21.42
   3  13   4  183.54   21.05
  -3 -13  -4  190.69   21.42
  -3 -13  -4  178.32   20.07
   3  12   4  269.26   31.22
   3  12   4  274.58   30.78
  -3 -12  -4  286.89   31.93
  -3 -12  -4  270.55   30.13
   3  11   4  170.69   19.63
   3  11   4  172.86   20.57
  -3 -11  -4  152.66   17.25
  -3 -11  -4  163.41   18.51
   3  10   4  353.18   39.42
   3  10   4  348.78   39.72
  -3 -10  -4  366.07   40.61
  -3 -10  -4  366.74   40.71
   3   9   4  197.81   22.51
   3   9   4  210.89   24.84
  -3  -9  -4  215.71   24.17
  -3  -9  -4  204.39   22.91
   3   8   4  312.82   35.56
   3   8   4  283.56   31.83
  -3  -8  -4  323.70   35.96
  -3  -8  -4  285.73   31.83
   3   7   4  419.62   47.18
   3   7   4  311.53   34.98
  -3  -7  -4  339.63   37.69
  -3  -7  -4  295.90   32.95
   3   6   4 1653.06  182.52
   3   6   4 1291.74  142.46
  -3  -6  -4 1376.13  151.51
  -3  -6  -4  918.21  101.18
   3   5   4  172.73   19.79
   3   5   4  130.77   16.24
  -3  -5  -4  116.23   13.39
  -3  -5  -4  103.07   12.00
   3   4   4   55.72    8.34
   3   4   4   69.65    8.88
  -3  -4  -4   74.30    9.02
  -3  -4  -4   70.74    8.58
  -3  -3  -4   46.00    5.97
  -3  -3  -4   53.01    6.78
   3   2   4  123.75   14.44
   3   2   4  131.65   15.90
  -3  -2  -4  152.22   17.25
  -3  -2  -4  167.07   18.85
   3   1   4   28.74    5.25
   3   1   4   42.33    7.29
   3  -1   4   39.18    6.30
   3  -1   4   32.20    5.52
  -3   1  -4   39.35    5.63
  -3   1  -4   27.79    5.12
  -3   2  -4  171.78   19.66
  -3   2  -4  133.07   15.32
   3  -3   4   54.03    7.49
   3  -3   4   56.81    8.07
  -3   3  -4   60.37    7.63
  -3   3  -4   63.21    8.30
   3  -4   4   70.81    9.83
   3  -4   4  105.04   12.64
  -3   4  -4  102.16   12.64
  -3   4  -4  105.55   12.41
   3  -5   4  169.64   20.40
   3  -5   4  145.54   16.95
  -3   5  -4  144.29   16.98
  -3   5  -4  148.15   16.98
  -3   6  -4 1758.13  193.74
  -3   6  -4 2023.19  222.62
   3  -7   4  458.60   51.01
   3  -7   4  501.98   55.99
  -3   7  -4  481.99   53.79
  -3   7  -4  512.83   56.74
   3  -8   4  424.36   47.59
   3  -8   4  389.11   43.42
  -3   8  -4  422.33   46.88
  -3   8  -4  536.22   59.72
   3  -9   4  244.72   27.45
   3  -9   4  298.55   33.83
  -3   9  -4  258.62   29.52
  -3   9  -4  260.11   29.05
   3 -10   4  579.60   64.43
   3 -10   4  412.84   45.76
  -3  10  -4  514.52   56.88
  -3  10  -4  515.54   57.55
   3 -11   4  220.62   25.25
   3 -11   4  180.73   20.40
  -3  11  -4  227.81   26.27
  -3  11  -4  188.96   21.29
   3 -12   4  331.87   37.35
   3 -12   4  293.29   32.67
  -3  12  -4  347.76   39.28
  -3  12  -4  350.47   38.88
   3 -13   4  219.37   25.05
   3 -13   4  201.23   22.64
  -3  13  -4  209.10   24.10
  -3  13  -4  236.32   26.57
   3 -14   4 1790.67  197.07
   3 -14   4 1728.98  190.35
  -3  14  -4 1514.76  167.00
  -3  14  -4 1806.26  198.73
   3 -15   4  164.22   18.57
   3 -15   4  141.41   16.44
  -3  15  -4  150.80   17.25
  -3  15  -4  137.04   16.24
   4  15   4  141.82   16.41
   4  15   4  111.75   15.15
   4  14   4  481.65   53.45
   4  14   4  529.78   59.38
  -4 -14  -4  484.36   53.49
  -4 -14  -4  489.78   54.13
   4  13   4  332.85   37.22
   4  13   4  298.00   34.00
  -4 -13  -4  319.76   35.49
  -4 -13  -4  348.78   38.74
   4  12   4  279.63   31.39
   4  12   4  240.31   27.90
  -4 -12  -4  237.84   26.54
  -4 -12  -4  298.41   33.22
   4  11   4  161.95   19.86
   4  11   4  154.73   17.96
  -4 -11  -4  148.87   16.91
  -4 -11  -4  149.04   16.98
   4  10   4   81.04   10.10
   4  10   4   62.33    9.86
  -4 -10  -4   90.70   10.71
  -4 -10  -4   85.99   10.13
   4   9   4  529.44   59.42
   4   9   4  446.40   49.59
  -4  -9  -4  531.13   58.71
  -4  -9  -4  433.18   48.03
   4   8   4  951.09  105.55
   4   8   4  813.48   89.92
  -4  -8  -4  888.72   97.96
  -4  -8  -4  713.49   78.74
   4   7   4 1769.65  195.27
   4   7   4 1467.31  161.78
  -4  -7  -4 1952.01  214.76
  -4  -7  -4 1363.93  150.19
   4   6   4  453.51   50.44
   4   6   4  485.04   54.33
  -4  -6  -4  394.88   43.79
  -4  -6  -4  417.92   46.33
   4   5   4   17.29    6.81
   4   5   4    8.13    3.97
  -4  -5  -4   13.56    3.32
  -4  -5  -4   10.00    2.81
   4   4   4  588.08   65.11
   4   4   4  448.09   50.44
  -4  -4  -4  453.18   50.23
  -4  -4  -4  544.69   60.20
   4   3   4   12.74    4.61
   4   3   4   12.34    5.46
  -4  -3  -4   19.25    3.83
  -4  -3  -4   17.29    3.83
   4   2   4   12.95    5.19
   4   2   4   14.95    4.20
  -4  -2  -4   16.88    3.93
  -4  -2  -4   19.59    3.93
   4  -1   4  136.66   16.03
   4  -1   4  193.54   22.54
  -4   1  -4  139.38   16.00
  -4   1  -4  186.35   21.22
   4  -2   4   12.68    5.52
   4  -2   4   17.93    4.68
  -4   2  -4   16.74    3.97
  -4   2  -4    6.17    3.97
   4  -3   4   13.35    5.29
   4  -3   4   20.51    4.17
  -4   3  -4   14.27    3.56
  -4   3  -4   13.86    4.54
   4  -4   4  607.74   67.32
   4  -4   4  667.39   74.06
  -4   4  -4  558.93   61.89
  -4   4  -4  744.67   82.40
   4  -5   4   11.05    5.22
   4  -5   4   10.30    3.73
   4  -6   4  477.58   53.35
   4  -6   4  554.18   61.49
  -4   6  -4  602.65   66.71
  -4   6  -4  619.26   68.70
   4  -7   4 2645.50  291.26
   4  -7   4 2515.00  276.79
  -4   7  -4 2105.55  231.64
  -4   7  -4 3112.91  342.68
   4  -8   4 1134.12  125.04
   4  -8   4 1378.51  152.09
  -4   8  -4 1111.41  122.43
  -4   8  -4 1328.34  146.60
   4  -9   4  687.39   75.92
   4  -9   4  680.61   75.48
  -4   9  -4  788.06   87.04
  -4   9  -4  687.39   76.33
   4 -10   4  103.07   12.24
   4 -10   4  114.80   14.20
  -4  10  -4  132.66   16.07
  -4  10  -4  112.80   13.25
   4 -11   4  215.30   24.68
   4 -11   4  207.74   23.39
  -4  11  -4  199.91   22.47
  -4  11  -4  218.28   25.05
   4 -12   4  328.65   36.61
   4 -12   4  362.68   40.64
  -4  12  -4  347.08   38.64
  -4  12  -4  364.03   40.81
   4 -13   4  401.32   44.64
   4 -13   4  434.53   48.20
  -4  13  -4  349.46   39.08
  -4  13  -4  421.99   46.77
   4 -14   4  563.67   62.43
   4 -14   4  590.45   65.18
  -4  14  -4  482.32   53.59
  -4  14  -4  585.37   64.67
   4 -15   4  142.73   16.30
   4 -15   4  149.21   17.32
  -4  15  -4  124.60   14.27
   5  13   4   33.79    8.10
   5  13   4   38.74    6.03
  -5 -13  -4   29.59    4.47
  -5 -13  -4   30.13    4.34
   5  12   4   10.58    4.14
   5  12   4    1.05    6.68
  -5 -12  -4    7.22    2.95
  -5 -12  -4    9.05    2.85
   5  11   4  507.75   56.91
   5  11   4  459.62   51.01
  -5 -11  -4  524.02   57.93
  -5 -11  -4  531.81   58.74
   5  10   4  134.56   17.25
   5  10   4  115.65   13.56
  -5 -10  -4  103.04   11.96
  -5 -10  -4  126.26   14.47
   5   9   4   19.22    7.19
   5   9   4   22.78    4.68
  -5  -9  -4   17.25    4.10
  -5  -9  -4   12.64    2.95
   5   8   4   17.96    7.39
   5   8   4   12.34    4.03
  -5  -8  -4   21.08    4.20
  -5  -8  -4   13.15    3.22
   5   7   4 5562.16  611.80
   5   7   4 3694.55  406.06
  -5  -7  -4 3874.19  426.06
  -5  -7  -4 3928.42  431.82
   5   6   4   49.08    7.05
   5   6   4   32.27    6.91
  -5  -6  -4   39.89    5.63
  -5  -6  -4   49.96    6.41
   5   5   4  877.20   96.80
   5   5   4  603.33   67.48
  -5  -5  -4  934.14  102.94
  -5  -5  -4  736.88   81.35
   5   4   4  118.70   13.80
   5   4   4  120.63   15.42
  -5  -4  -4  138.97   15.83
  -5  -4  -4  155.68   17.73
   5   3   4  644.68   71.82
   5   3   4  537.57   59.62
  -5  -3  -4  634.17   70.06
  -5  -3  -4  595.53   65.82
   5   2   4    6.91    4.75
   5   2   4   -2.14    3.29
  -5  -2  -4    0.10    3.42
  -5  -2  -4   -1.05    2.68
   5   1   4 3840.29  422.67
   5   1   4 4677.50  514.52
  -5  -1  -4 3657.26  401.99
  -5  -1  -4 4531.75  498.26
   5   0   4   83.08   10.85
   5   0   4   52.74    7.08
  -5   0  -4   80.57    9.86
  -5   0  -4   54.67    7.08
   5  -2   4   10.44    3.53
   5  -2   4    7.29    5.15
  -5   2  -4    6.00    2.95
  -5   2  -4    2.47    3.56
   5  -3   4  642.65   71.42
   5  -3   4  491.48   54.57
  -5   3  -4  476.56   52.88
  -5   3  -4  597.57   66.26
   5  -4   4  126.12   14.95
   5  -4   4  124.16   15.05
  -5   4  -4  119.17   13.96
  -5   4  -4  138.36   16.34
   5  -5   4  951.09  105.18
   5  -5   4  942.28  104.16
  -5   5  -4 1022.27  112.84
  -5   5  -4 1028.71  113.48
   5  -6   4   61.38    8.81
   5  -6   4   53.96    7.46
  -5   6  -4   67.86    8.74
  -5   6  -4   63.28    8.51
   5  -7   4 5599.44  615.53
   5  -7   4 5057.12  555.88
  -5   7  -4 5077.46  558.25
  -5   7  -4 5945.17  653.49
   5  -8   4   32.13    6.17
   5  -8   4   18.47    4.14
  -5   8  -4   25.25    5.02
  -5   8  -4   38.44    6.68
   5  -9   4   31.79    5.59
   5  -9   4   29.32    5.83
  -5   9  -4   26.71    6.00
  -5   9  -4   34.51    5.63
   5 -10   4  172.56   19.59
   5 -10   4  154.43   18.07
  -5  10  -4  209.44   23.93
  -5  10  -4  174.93   19.86
   5 -11   4  739.25   81.72
   5 -11   4  672.14   74.40
  -5  11  -4  668.75   74.06
   5 -12   4   20.44    5.12
   5 -12   4   12.61    3.90
  -5  12  -4   11.90    3.97
  -5  12  -4   12.34    4.81
   5 -13   4   36.91    5.15
   5 -13   4   46.40    6.78
  -5  13  -4   39.22    5.83
  -5  13  -4   37.93    6.41
   6  12   4  193.27   21.86
   6  12   4  141.61   17.59
  -6 -12  -4  168.22   18.91
  -6 -12  -4  174.83   19.66
   6  11   4  268.24   30.13
   6  11   4  317.32   36.27
  -6 -11  -4  223.64   24.98
  -6 -11  -4  288.28   32.10
   6  10   4   54.03    9.46
   6  10   4   42.61    6.13
  -6 -10  -4   57.82    7.15
  -6 -10  -4   58.60    7.39
   6   9   4  203.95   24.37
   6   9   4  182.22   20.68
  -6  -9  -4  241.13   26.98
  -6  -9  -4  173.95   19.59
   6   8   4  324.92   37.05
   6   8   4  369.79   41.25
  -6  -8  -4  309.05   34.37
  -6  -8  -4  339.63   37.69
   6   7   4  500.29   55.96
   6   7   4  688.74   76.09
  -6  -7  -4  728.06   80.33
  -6  -7  -4  584.01   64.57
  -6  -6  -4  431.48   47.83
  -6  -6  -4  561.64   62.06
   6   5   4  179.81   21.66
   6   5   4  195.91   22.27
  -6  -5  -4  183.88   20.74
  -6  -5  -4  171.78   19.59
   6   4   4   67.38   10.27
   6   4   4   53.05    7.59
  -6  -4  -4   61.21    7.80
  -6  -4  -4   47.72    6.41
   6   3   4   47.32    8.98
   6   3   4   24.17    4.95
  -6  -3  -4   12.88    3.29
  -6  -3  -4   20.34    4.20
   6   2   4   60.98    8.07
   6   2   4   77.59   10.44
  -6  -2  -4   63.93    8.00
  -6  -2  -4   57.18    7.36
   6   1   4  183.47   21.01
   6   1   4  195.81   22.64
  -6  -1  -4  199.34   22.54
  -6  -1  -4  183.37   20.78
   6   0   4 3684.38  405.04
   6   0   4 4511.41  496.22
  -6   0  -4 4501.24  494.87
  -6   0  -4 3847.07  422.67
   6  -1   4  160.36   18.44
   6  -1   4  223.57   25.59
  -6   1  -4  163.37   18.57
  -6   1  -4  218.42   24.61
   6  -2   4   66.06    9.08
   6  -2   4   48.20    7.05
  -6   2  -4   50.13    6.91
  -6   2  -4   62.50    8.10
   6  -3   4   15.73    5.32
   6  -3   4   17.22    4.14
  -6   3  -4   17.86    4.47
  -6   3  -4   14.00    3.93
   6  -4   4   43.32    6.30
   6  -4   4   53.01    7.97
  -6   4  -4   50.33    7.19
  -6   4  -4   48.06    6.98
   6  -5   4  174.86   19.96
   6  -5   4  195.27   22.47
   6  -6   4  495.54   54.94
   6  -6   4  630.11   69.89
  -6   6  -4  593.84   65.76
  -6   6  -4  592.14   65.65
   6  -7   4  775.85   85.86
   6  -7   4  758.91   83.96
  -6   7  -4  946.68  104.53
  -6   7  -4  861.95   95.14
   6  -8   4  469.78   52.23
   6  -8   4  492.49   54.60
  -6   8  -4  461.31   51.15
  -6   8  -4  533.51   59.21
   6  -9   4  285.77   32.10
   6  -9   4  280.89   31.69
  -6   9  -4  254.55   28.64
  -6   9  -4  284.62   31.96
   6 -10   4   84.36   10.20
   6 -10   4   92.63   11.46
  -6  10  -4   76.20    9.83
  -6  10  -4  102.13   12.30
   6 -11   4  312.99   34.91
   6 -11   4  448.77   49.83
  -6  11  -4  458.94   50.88
  -6  11  -4  420.97   46.77
   6 -12   4  226.38   25.46
   6 -12   4  239.64   26.78
  -6  12  -4  236.52   26.51
  -6  12  -4  294.61   32.98
  -7 -10  -4  159.85   18.03
  -7 -10  -4  159.51   17.93
   7   9   4  223.94   26.40
   7   9   4  266.11   29.83
  -7  -9  -4  213.30   23.90
  -7  -9  -4  245.98   27.42
   7   8   4  413.52   45.93
   7   8   4  345.73   39.22
  -7  -8  -4  334.75   37.22
  -7  -8  -4  387.76   42.91
   7   7   4  601.63   66.47
   7   7   4  515.54   57.59
  -7  -7  -4  647.39   71.45
  -7  -7  -4  552.49   61.08
   7   6   4  874.83   96.50
   7   6   4  740.60   82.26
  -7  -6  -4  786.70   86.77
  -7  -6  -4  978.21  107.79
   7   5   4   32.67    7.15
   7   5   4   33.93    5.76
  -7  -5  -4   40.67    5.69
  -7  -5  -4   39.11    5.52
   7   4   4  216.72   25.18
   7   4   4  202.08   22.95
  -7  -4  -4  213.03   23.90
  -7  -4  -4  190.22   21.49
   7   3   4    9.73    3.97
   7   3   4    9.32    5.86
  -7  -3  -4    8.95    3.49
  -7  -3  -4    4.51    3.15
   7   2   4   25.83    4.58
   7   2   4   35.79    6.71
  -7  -2  -4   46.88    6.37
  -7  -2  -4   32.27    4.98
   7   1   4   19.63    4.20
   7   1   4   29.45    6.00
  -7  -1  -4   28.95    4.71
  -7  -1  -4   32.44    4.95
   7   0   4 3697.94  406.74
   7   0   4 4064.00  447.07
  -7   0  -4 3826.74  420.64
  -7   0  -4 4108.06  451.82
   7  -1   4   38.20    6.61
   7  -1   4   41.79    6.58
  -7   1  -4   27.69    4.91
  -7   1  -4   23.96    4.68
   7  -2   4   35.01    6.13
   7  -2   4   25.69    4.98
  -7   2  -4   24.95    4.64
  -7   2  -4   37.96    5.76
   7  -3   4    9.12    3.97
   7  -3   4    7.46    4.51
  -7   3  -4   20.81    4.78
  -7   3  -4    9.12    3.76
   7  -4   4  173.44   19.93
   7  -4   4  174.83   20.20
  -7   4  -4  160.90   18.47
  -7   4  -4  163.85   18.88
   7  -5   4   27.12    5.59
   7  -5   4   33.62    6.07
  -7   5  -4   29.59    5.29
  -7   5  -4   26.27    4.91
   7  -6   4  832.12   91.99
   7  -6   4 1070.74  118.06
  -7   6  -4  746.71   82.50
  -7   6  -4  781.62   86.40
   7  -7   4  706.71   78.20
   7  -7   4  687.39   76.06
   7  -8   4  534.86   59.25
   7  -8   4  557.23   61.76
  -7   8  -4  516.56   57.18
  -7   8  -4  557.57   61.79
   7  -9   4  371.83   41.35
   7  -9   4  350.81   39.05
  -7   9  -4  307.97   34.40
  -7   9  -4  312.00   34.84
   7 -10   4  226.86   25.59
   7 -10   4  228.55   25.69
  -7  10  -4  215.94   24.27
  -7  10  -4  243.87   27.32
   8   8   4  137.27   15.63
   8   8   4  115.65   14.57
  -8  -8  -4  122.70   14.07
  -8  -8  -4  137.41   15.52
   8   7   4 2625.84  288.75
   8   7   4 3122.40  343.69
  -8  -7  -4 2901.74  319.02
  -8  -7  -4 2561.78  281.70
   8   6   4   30.10    5.12
   8   6   4   38.23    7.49
  -8  -6  -4   37.79    5.46
  -8  -6  -4   25.08    4.34
   8   5   4  599.26   66.71
   8   5   4  527.40   58.33
   8   4   4  212.45   24.54
   8   4   4  188.22   21.39
  -8  -4  -4  190.59   21.42
  -8  -4  -4  198.93   22.37
   8   3   4  668.75   74.26
   8   3   4  567.74   62.81
  -8  -3  -4  555.20   61.35
  -8  -3  -4  820.26   90.43
   8   2   4   24.51    6.64
   8   2   4   25.56    4.51
  -8  -2  -4   21.96    4.20
  -8  -2  -4   12.24    4.14
   8   1   4 2961.06  325.83
   8   1   4 2893.61  318.24
  -8  -1  -4 3090.54  339.97
  -8  -1  -4 2951.91  324.58
   8   0   4  566.72   62.91
   8   0   4  615.87   68.16
  -8   0  -4  631.46   69.76
  -8   0  -4  643.66   71.11
   8  -1   4 2545.85  280.14
   8  -1   4 2845.14  313.02
  -8   1  -4 2764.47  304.07
  -8   1  -4 2693.97  296.28
   8  -2   4   41.93    6.51
   8  -2   4   22.61    5.02
  -8   2  -4   21.69    4.78
  -8   2  -4   19.96    4.14
   8  -3   4  514.52   57.08
   8  -3   4  582.31   64.47
  -8   3  -4  579.94   64.23
  -8   3  -4  524.69   58.06
   8  -4   4  181.58   20.81
   8  -4   4  187.47   21.56
  -8   4  -4  192.15   21.90
  -8   4  -4  179.17   20.34
   8  -5   4  472.50   52.47
   8  -5   4  516.90   57.25
  -8   5  -4  523.00   57.96
  -8   5  -4  516.56   57.21
   8  -6   4   41.35    6.30
   8  -6   4   27.69    5.19
  -8   6  -4   26.84    4.78
  -8   6  -4   27.15    4.85
   8  -7   4 3013.60  331.39
   8  -7   4 2990.89  328.95
  -8   7  -4 2423.49  266.52
  -8   7  -4 2699.05  296.85
   8  -8   4  155.10   17.83
   8  -8   4  166.70   18.88
  -8   8  -4  171.98   19.52
  -8   8  -4  131.89   15.39
   9   4   4  191.95   21.62
   9   4   4  215.57   24.54
  -9  -4  -4  184.49   20.74
  -9  -4  -4  219.84   24.57
   9   3   4   29.96    5.15
   9   3   4   25.49    5.93
  -9  -3  -4   29.35    4.95
  -9  -3  -4   21.62    3.90
   9   2   4   14.54    4.07
   9   2   4   28.64    6.10
  -9  -2  -4   14.27    3.56
  -9  -2  -4   13.73    3.59
   9   1   4  284.45   31.83
   9   1   4  301.50   33.89
  -9  -1  -4  273.29   30.44
  -9  -1  -4  288.99   32.20
   9   0   4 2096.06  230.72
   9   0   4 2242.83  246.75
  -9   0  -4 2080.47  228.86
  -9   0  -4 2405.86  264.65
   9  -1   4  309.02   34.47
   9  -1   4  250.14   28.20
  -9   1  -4  279.09   31.15
  -9   1  -4  284.79   31.76
   9  -2   4   13.42    4.51
   9  -2   4   18.44    4.14
  -9   2  -4   10.51    3.49
  -9   2  -4   12.41    3.56
   9  -3   4   20.40    4.58
   9  -3   4   19.66    4.88
  -9   3  -4   25.66    4.88
  -9   3  -4   22.95    4.00
   9  -4   4  151.51   17.35
   9  -4   4  226.32   25.52
  -9   4  -4  168.42   18.98
  -9   4  -4  197.34   22.17
 -12   6   5 2350.27  258.58
  12  -6  -5 1823.89  200.66
  12  -6  -5 1624.92  178.90
 -12   5   5  533.84   59.25
  12  -5  -5  424.70   47.11
  12  -5  -5  403.01   44.84
 -12   4   5   55.18    8.37
  12  -4  -5   46.57    6.95
  12  -4  -5   53.93    7.49
 -12   3   5   15.96    6.07
 -12   3   5    5.19    5.83
  12  -3  -5    8.88    4.17
  12  -3  -5   15.56    4.91
 -12   2   5 1656.44  182.59
 -12   2   5 1831.68  201.71
  12  -2  -5 1478.16  162.80
  12  -2  -5 1557.81  171.51
 -12   1   5 1345.29  148.29
 -12   1   5 1322.92  145.88
  12  -1  -5 1179.20  130.02
  12  -1  -5 1256.82  138.46
 -12   0   5    3.56    5.97
 -12   0   5    8.64    5.12
  12   0  -5   -2.07    3.63
  12   0  -5   -1.29    5.46
 -12  -1   5 1361.90  150.02
 -12  -1   5 1064.98  117.55
  12   1  -5 1077.86  118.97
  12   1  -5 1145.31  126.19
 -12  -2   5 1586.62  174.69
 -12  -2   5 1265.98  139.65
  12   2  -5 1317.16  145.04
  12   2  -5 1380.54  152.15
 -12  -3   5   12.41    4.41
 -12  -3   5    8.85    5.49
  12   3  -5   12.98    5.08
  12   3  -5    9.83    3.86
 -12  -4   5   37.01    6.61
 -12  -4   5   50.50    7.05
  12   4  -5   40.61    6.75
  12   4  -5   35.18    5.59
 -12  -5   5  381.32   42.37
 -12  -5   5  300.68   33.73
  12   5  -5  385.72   43.08
  12   5  -5  328.27   36.50
 -12  -6   5 1367.32  150.66
 -12  -6   5 1691.02  186.12
  12   6  -5 1833.38  201.74
  12   6  -5 1516.46  167.00
 -11   9   5  168.05   19.29
  11  -9  -5  136.19   15.76
  11  -9  -5  163.07   18.54
 -11   8   5  890.76   98.33
  11  -8  -5  818.22   90.26
  11  -8  -5  722.98   79.89
 -11   7   5  215.00   24.51
  11  -7  -5  174.59   19.83
  11  -7  -5  185.78   21.25
 -11   6   5 1657.46  182.52
  11  -6  -5 1388.34  152.93
  11  -6  -5 1141.92  125.85
 -11   5   5  806.70   89.18
  11  -5  -5  688.07   76.06
  11  -5  -5  634.51   70.09
  11  -4  -5   90.09   10.91
  11  -4  -5   92.70   11.22
 -11   3   5  238.45   27.56
 -11   3   5  324.00   36.40
  11  -3  -5  319.22   35.66
  11  -3  -5  312.68   34.91
 -11   2   5   56.88    8.30
 -11   2   5   35.89    7.02
  11  -2  -5   22.85    4.85
  11  -2  -5   31.83    5.19
 -11   1   5  347.42   38.91
 -11   1   5  297.09   33.59
  11  -1  -5  282.11   31.62
  11  -1  -5  348.44   38.78
 -11   0   5    8.91    4.64
 -11   0   5   14.64    5.42
  11   0  -5   13.93    4.14
  11   0  -5    3.69    4.30
  11   1  -5  294.72   32.88
  11   1  -5  279.46   31.45
 -11  -2   5   40.88    6.34
 -11  -2   5   29.32    6.03
  11   2  -5   28.40    4.85
  11   2  -5   31.52    5.83
 -11  -3   5  238.38   27.18
 -11  -3   5  307.97   34.54
  11   3  -5  256.42   28.68
  11   3  -5  274.68   30.95
 -11  -4   5   80.57   10.07
 -11  -4   5   70.03    9.49
  11   4  -5   74.47    9.29
  11   4  -5   73.72    9.80
 -11  -5   5  475.55   52.81
 -11  -5   5  453.51   50.40
  11   5  -5  545.03   60.50
  11   5  -5  502.32   55.76
 -11  -6   5  890.08   98.23
 -11  -6   5  926.69  102.33
  11   6  -5 1043.96  115.07
  11   6  -5  987.70  109.07
 -11  -7   5  118.94   14.30
 -11  -7   5  133.82   15.46
  11   7  -5  136.19   15.66
  11   7  -5  155.00   18.13
 -11  -8   5  591.47   65.52
 -11  -8   5  625.36   69.15
  11   8  -5  632.14   69.82
  11   8  -5  697.22   77.18
 -11  -9   5  146.60   16.95
 -11  -9   5  129.75   14.98
  11   9  -5  134.09   15.73
  11   9  -5  121.99   14.03
 -10  11   5  515.88   57.25
  10 -11  -5  507.07   56.13
  10 -11  -5  453.85   50.30
 -10  10   5   55.25    8.17
  10 -10  -5   50.13    6.81
  10 -10  -5   52.50    7.02
 -10   9   5  628.41   69.48
  10  -9  -5  549.10   60.67
  10  -9  -5  557.23   61.65
 -10   8   5    4.14    4.20
  10  -8  -5    3.86    3.29
  10  -8  -5    3.63    3.32
 -10   7   5    2.41    4.71
  10  -7  -5    2.81    3.36
  10  -7  -5    4.54    3.53
 -10   6   5  758.23   83.75
  10  -6  -5  633.50   69.99
  10  -6  -5  534.86   59.18
  10  -5  -5 1633.40  179.88
  10  -5  -5 1994.72  219.50
  10  -4  -5   96.19   11.42
  10  -4  -5   80.64    9.93
 -10   3   5   34.27    5.97
 -10   3   5   29.25    6.51
  10  -3  -5   32.17    5.22
  10  -3  -5   42.54    6.10
 -10   2   5   48.37    7.39
 -10   2   5   43.59    6.95
  10  -2  -5   52.81    6.98
  10  -2  -5   52.03    7.05
 -10   1   5 1286.99  141.88
 -10   1   5 1889.64  208.01
  10  -1  -5 1547.64  170.42
  10  -1  -5 1756.77  193.37
 -10   0   5    2.98    4.47
 -10   0   5    8.54    4.17
 -10  -1   5 1376.47  151.68
 -10  -1   5 1863.54  205.13
  10   1  -5 1561.20  171.85
  10   1  -5 1578.15  173.85
 -10  -2   5   50.27    7.90
 -10  -2   5   54.98    7.56
  10   2  -5   44.47    6.54
  10   2  -5   62.10    7.90
 -10  -3   5   23.46    4.88
 -10  -3   5   39.96    6.95
  10   3  -5   26.64    4.78
  10   3  -5   41.76    6.61
 -10  -4   5   70.33    8.95
 -10  -4   5   86.43   10.95
  10   4  -5   83.08    9.97
  10   4  -5   96.23   11.90
 -10  -5   5 1287.67  141.88
 -10  -5   5 1406.98  155.07
  10   5  -5 1439.52  158.66
  10   5  -5 1368.68  150.73
 -10  -6   5  504.02   56.03
 -10  -6   5  477.92   53.01
  10   6  -5  501.64   55.55
  10   6  -5  517.91   57.52
 -10  -7   5    6.37    3.93
 -10  -7   5    9.19    4.47
  10   7  -5    0.71    3.80
  10   7  -5    8.64    4.47
 -10  -8   5    2.91    3.86
 -10  -8   5    1.56    4.61
  10   8  -5    7.15    4.68
  10   8  -5    1.83    3.83
 -10  -9   5  508.42   56.44
 -10  -9   5  499.95   55.35
  10   9  -5  566.72   62.84
  10   9  -5  488.76   54.13
  10  10  -5   46.64    6.30
  10  10  -5   32.10    6.10
 -10 -11   5  429.79   47.59
 -10 -11   5  438.60   48.64
  10  11  -5  407.08   45.05
  10  11  -5  439.96   48.94
  -9  12   5  594.18   66.03
   9 -12  -5  589.43   65.15
   9 -12  -5  527.40   58.33
  -9  11   5   16.98    5.46
   9 -11  -5   16.47    4.47
   9 -11  -5   19.96    4.34
  -9  10   5   69.01    9.15
   9 -10  -5   72.33    8.85
   9 -10  -5   82.91   10.03
  -9   9   5  240.62   27.18
   9  -9  -5  207.98   23.32
   9  -9  -5  235.84   26.37
  -9   8   5  282.14   31.62
   9  -8  -5  250.25   27.90
   9  -8  -5  248.89   27.86
   9  -7  -5  688.74   76.06
   9  -7  -5  638.58   70.47
  -9   6   5 2266.89  249.40
  -9   6   5 1666.27  183.78
   9  -6  -5 1683.56  185.30
   9  -6  -5 1984.21  218.28
  -9   5   5 1322.24  145.99
  -9   5   5 1858.46  204.56
   9  -5  -5 1653.39  182.02
   9  -5  -5 1791.69  197.17
  -9   4   5  151.95   17.52
  -9   4   5  131.61   15.90
   9  -4  -5  153.07   17.39
   9  -4  -5  159.71   18.17
  -9   3   5  128.53   15.42
  -9   3   5  153.14   17.56
   9  -3  -5  203.17   22.88
   9  -3  -5  182.29   20.61
  -9   2   5 1106.33  121.95
  -9   2   5 1157.85  127.75
   9  -2  -5 1359.19  149.68
   9  -2  -5 1433.42  157.85
   9  -1  -5 3511.51  386.06
   9  -1  -5 3165.11  348.10
  -9   0   5    2.88    3.83
  -9   0   5   14.51    4.41
  -9  -1   5 3169.17  348.44
  -9  -1   5 3569.13  392.50
   9   1  -5 3153.58  346.74
   9   1  -5 2876.32  316.31
  -9  -2   5 1317.16  145.21
  -9  -2   5 1138.53  125.45
   9   2  -5 1315.46  144.97
   9   2  -5 1143.28  125.95
  -9  -3   5  146.12   16.78
  -9  -3   5  202.01   23.01
   9   3  -5  158.39   18.03
   9   3  -5  212.25   24.07
  -9  -4   5  124.50   14.44
  -9  -4   5  138.90   16.27
   9   4  -5  126.67   14.51
   9   4  -5  152.36   17.69
  -9  -5   5 1382.57  152.32
  -9  -5   5 1618.82  178.36
   9   5  -5 1453.75  160.02
   9   5  -5 1497.82  165.03
  -9  -6   5 2018.10  222.11
  -9  -6   5 1757.11  193.47
   9   6  -5 1838.12  202.25
   9   6  -5 1514.76  166.93
  -9  -7   5  574.52   63.59
  -9  -7   5  631.46   69.93
   9   7  -5  631.12   69.65
   9   7  -5  695.86   77.11
  -9  -8   5  241.57   27.15
  -9  -8   5  251.77   28.44
   9   8  -5  245.37   27.49
   9   8  -5  242.76   27.62
  -9  -9   5  223.64   25.15
  -9  -9   5  216.45   24.57
   9   9  -5  235.60   26.40
   9   9  -5  210.89   24.17
  -9 -10   5   70.74    8.81
  -9 -10   5   74.67    9.76
   9  10  -5   62.16    8.00
   9  10  -5   82.70   10.78
  -9 -11   5   11.25    3.69
  -9 -11   5    9.15    4.07
   9  11  -5   12.47    4.17
   9  11  -5   14.98    4.95
  -9 -12   5  602.65   66.54
  -9 -12   5  533.84   59.15
   9  12  -5  629.77   69.48
   9  12  -5  529.78   58.77
  -9 -13   5 1292.41  142.29
  -8  14   5  116.23   14.37
   8 -14  -5  145.88   16.74
   8 -14  -5  144.56   16.81
  -8  13   5   10.30    6.58
   8 -13  -5    7.19    4.17
   8 -13  -5    6.07    3.63
  -8  12   5 1256.15  138.56
   8 -12  -5 1342.24  147.78
   8 -12  -5 1336.82  147.21
  -8  11   5   63.11    8.88
   8 -11  -5   62.33    7.80
   8 -11  -5   58.54    7.39
  -8  10   5   54.16    7.66
   8 -10  -5   62.47    7.86
   8 -10  -5   47.15    6.24
  -8   9   5  254.25   28.54
   8  -9  -5  259.06   28.84
   8  -9  -5  291.33   32.44
  -8   8   5  720.94   79.62
  -8   8   5  678.58   75.31
   8  -8  -5  604.01   66.64
   8  -8  -5  693.15   76.40
  -8   7   5  277.06   30.91
  -8   7   5  305.05   34.54
   8  -7  -5  227.03   25.32
   8  -7  -5  255.50   28.40
  -8   6   5 2778.37  305.77
  -8   6   5 2970.55  326.68
   8  -6  -5 2665.84  293.16
   8  -6  -5 3381.70  371.83
  -8   5   5  380.98   42.64
  -8   5   5  389.79   43.22
   8  -5  -5  389.11   43.08
   8  -5  -5  416.57   46.13
  -8   4   5   76.53   10.10
  -8   4   5   57.62    7.36
   8  -4  -5   85.31   10.07
   8  -4  -5   76.98    9.08
  -8   3   5  620.95   68.70
  -8   3   5  607.40   67.08
   8  -3  -5  752.47   82.97
   8  -3  -5  747.38   82.43
  -8   2   5  275.80   30.78
  -8   2   5  204.18   22.98
   8  -2  -5  338.41   37.52
   8  -2  -5  309.02   34.30
  -8   1   5  492.49   54.57
  -8   1   5  376.91   41.89
   8  -1  -5  512.83   56.74
   8  -1  -5  390.13   43.22
  -8   0   5    0.58    3.36
  -8   0   5    1.66    3.59
   8   0  -5   14.24    3.25
   8   0  -5    3.46    3.22
  -8  -1   5  370.81   41.32
  -8  -1   5  406.06   45.15
   8   1  -5  423.69   47.01
   8   1  -5  368.10   40.88
  -8  -2   5  268.04   30.06
  -8  -2   5  318.17   35.62
   8   2  -5  285.56   31.79
   8   2  -5  370.47   41.22
  -8  -3   5  702.98   77.75
  -8  -3   5  634.51   70.20
   8   3  -5  792.46   87.52
   8   3  -5  688.41   75.99
  -8  -4   5   74.26    9.52
  -8  -4   5   70.98    9.05
   8   4  -5   66.94    8.07
   8   4  -5   74.60    9.32
  -8  -5   5  396.57   44.27
  -8  -5   5  359.96   40.06
   8   5  -5  377.25   41.83
   8   5  -5  379.28   42.30
  -8  -6   5 2831.24  311.43
  -8  -6   5 2743.45  301.87
   8   6  -5 2883.44  317.09
   8   6  -5 2960.04  325.70
  -8  -7   5  250.79   28.13
  -8  -7   5  256.31   29.01
   8   7  -5  291.63   32.47
   8   7  -5  275.02   30.98
  -8  -8   5  674.85   74.53
  -8  -8   5  779.92   86.23
   8   8  -5  767.38   84.64
   8   8  -5  625.02   69.25
  -8  -9   5  277.26   31.18
  -8  -9   5  286.99   32.00
   8   9  -5  267.06   30.27
   8   9  -5  292.17   32.54
  -8 -10   5   71.48    8.88
  -8 -10   5   66.50    8.71
   8  10  -5   61.21    7.76
   8  10  -5   44.06    7.05
  -8 -11   5   64.37    8.24
  -8 -11   5   67.96    9.02
   8  11  -5   55.96    8.07
   8  11  -5   63.86    8.03
  -8 -12   5 1432.74  157.81
  -8 -12   5 1417.49  156.05
   8  12  -5 1420.20  156.59
   8  12  -5  940.58  103.65
  -8 -13   5    5.42    2.85
  -8 -13   5    6.10    3.93
   8  13  -5    3.46    3.29
   8  13  -5    8.61    4.37
  -8 -14   5  135.11   15.56
  -8 -14   5  132.36   14.98
   8  14  -5  185.34   20.88
   8  14  -5  151.41   17.73
  -7  15   5  470.80   52.47
   7 -15  -5  860.93   95.01
  -7  14   5   27.35    7.42
   7 -14  -5   27.76    4.85
   7 -14  -5   18.17    4.51
  -7  13   5 2668.89  293.67
   7 -13  -5 2744.47  301.83
   7 -13  -5 2451.28  269.60
  -7  12   5  127.31   15.18
   7 -12  -5  126.39   14.41
   7 -12  -5  120.19   13.86
  -7  11   5  847.71   93.62
   7 -11  -5  704.34   77.69
   7 -11  -5  756.53   83.38
  -7  10   5  310.68   35.18
  -7  10   5  253.60   28.51
   7 -10  -5  242.89   27.08
   7 -10  -5  224.79   25.05
  -7   9   5  631.12   69.79
  -7   9   5  708.06   78.50
   7  -9  -5  607.74   67.04
   7  -9  -5  616.55   67.96
  -7   8   5   65.01    8.91
  -7   8   5   57.35    7.36
   7  -8  -5   60.40    7.22
   7  -8  -5   76.13    8.88
  -7   7   5   37.73    5.29
  -7   7   5   31.86    5.56
   7  -7  -5   38.30    4.95
   7  -7  -5   39.89    4.98
  -7   6   5  524.69   58.30
  -7   6   5  469.78   51.86
   7  -6  -5  473.51   52.27
   7  -6  -5  517.24   57.08
   7  -5  -5 1950.99  214.66
   7  -5  -5 1616.45  177.88
  -7   4   5   21.56    3.93
  -7   4   5   28.54    5.05
   7  -4  -5   26.95    3.73
   7  -4  -5   29.42    4.14
  -7   3   5   85.21   10.71
  -7   3   5   81.11    9.59
   7  -3  -5  103.75   11.93
   7  -3  -5   90.06   10.51
  -7   2   5   17.15    4.34
  -7   2   5   23.25    4.27
  -7   1   5 1166.66  128.63
  -7   1   5 1099.55  121.17
   7  -1  -5 1113.11  122.60
   7  -1  -5 1129.04  124.33
  -7   0   5    0.54    3.36
  -7   0   5   -0.47    3.08
   7   0  -5    0.54    2.71
   7   0  -5    1.56    2.71
  -7  -1   5  934.82  103.18
  -7  -1   5 1101.58  121.41
   7   1  -5 1178.87  129.85
   7   1  -5  982.61  108.23
  -7  -2   5   21.12    4.20
  -7  -2   5   15.63    3.93
   7   2  -5   18.78    3.73
   7   2  -5   19.86    3.46
  -7  -3   5   71.15    8.68
  -7  -3   5   76.16    9.42
   7   3  -5   80.06    9.76
   7   3  -5   69.59    8.24
  -7  -4   5   23.29    4.17
  -7  -4   5   21.90    4.37
   7   4  -5   22.61    4.10
   7   4  -5   25.56    4.30
  -7  -5   5 1770.67  194.86
  -7  -5   5 1795.41  197.71
   7   5  -5 1688.64  185.95
   7   5  -5 1924.55  211.71
  -7  -6   5  524.35   58.06
  -7  -6   5  496.22   55.15
   7   6  -5  446.73   49.66
   7   6  -5  494.87   54.71
  -7  -7   5   44.10    6.24
  -7  -7   5   40.91    6.64
   7   7  -5   38.88    5.49
   7   7  -5   62.03    8.30
  -7  -8   5   67.48    8.95
  -7  -8   5   84.77   10.27
   7   8  -5   72.20    9.39
   7   8  -5   75.72    9.19
  -7  -9   5  776.53   85.79
  -7  -9   5  680.61   75.35
   7   9  -5  707.73   78.37
   7   9  -5  944.31  104.09
  -7 -10   5  303.36   33.93
  -7 -10   5  276.45   31.15
   7  10  -5  309.16   34.44
   7  10  -5  285.67   32.23
  -7 -11   5  813.14   89.72
  -7 -11   5  833.81   92.13
   7  11  -5  800.60   88.57
   7  11  -5  896.52   98.84
  -7 -12   5  147.54   16.85
  -7 -12   5  127.61   15.15
   7  12  -5  119.07   14.30
   7  12  -5  180.12   20.37
  -7 -13   5 3227.81  354.88
  -7 -13   5 2795.99  307.53
   7  13  -5 2643.13  290.89
   7  13  -5 3136.64  344.71
  -7 -14   5   24.51    4.71
  -7 -14   5   30.78    4.71
   7  14  -5   28.44    4.64
   7  14  -5   31.01    5.86
  -7 -15   5  681.29   75.28
  -7 -15   5  641.63   70.77
  -6  15   5  114.29   14.51
   6 -15  -5  137.48   15.76
   6 -15  -5  121.68   14.27
  -6  14   5    4.61    5.97
   6 -14  -5    2.00    3.56
   6 -14  -5    4.44    3.42
  -6  13   5 2042.17  224.86
   6 -13  -5 2333.67  256.69
   6 -13  -5 2208.93  242.96
  -6  12   5  977.87  107.99
   6 -12  -5  988.71  108.90
   6 -12  -5  865.00   95.35
  -6  11   5    5.49    5.15
  -6  11   5    2.58    5.66
   6 -11  -5    7.22    3.32
   6 -11  -5    1.76    2.34
  -6  10   5   98.84   12.74
  -6  10   5  101.11   12.17
   6 -10  -5   83.18    9.56
   6 -10  -5   77.55    9.08
  -6   9   5  307.73   34.30
  -6   9   5  320.44   35.93
   6  -9  -5  261.97   29.05
   6  -9  -5  276.38   30.64
  -6   8   5  497.58   55.25
  -6   8   5  463.34   51.28
   6  -8  -5  441.65   48.71
   6  -8  -5  466.73   51.52
  -6   7   5  820.60   90.43
  -6   7   5  814.83   89.89
   6  -7  -5  946.01  104.16
   6  -7  -5  987.70  108.73
  -6   6   5  566.05   62.54
  -6   6   5  558.25   61.59
   6  -6  -5  623.33   68.70
   6  -6  -5  589.77   64.98
  -6   5   5 2881.07  317.05
  -6   5   5 3164.09  348.10
   6  -5  -5 3420.00  376.23
   6  -5  -5 3497.96  385.05
  -6   4   5  274.35   30.44
  -6   4   5  298.21   33.08
   6  -4  -5  317.49   35.08
   6  -4  -5  321.49   35.52
  -6   3   5  495.20   54.71
  -6   3   5  426.40   47.11
   6  -3  -5  464.70   51.28
   6  -3  -5  425.72   46.94
  -6   2   5  683.66   75.38
  -6   2   5  697.56   76.91
   6  -2  -5  728.40   80.23
   6  -2  -5  694.51   76.50
  -6   1   5 4633.44  509.44
  -6   1   5 3748.78  412.16
  -6   0   5    3.36    2.81
  -6   0   5    1.63    2.47
  -6  -1   5 4674.11  513.85
  -6  -1   5 4663.94  512.83
   6   1  -5 4192.80  460.97
   6   1  -5 4521.58  497.24
  -6  -2   5  730.44   80.60
  -6  -2   5  677.90   74.84
   6   2  -5  776.19   85.62
   6   2  -5  780.26   85.96
  -6  -3   5  383.69   42.64
  -6  -3   5  412.84   45.79
   6   3  -5  403.69   44.64
   6   3  -5  461.65   51.08
  -6  -4   5  304.61   34.03
  -6  -4   5  303.02   33.73
   6   4  -5  303.50   33.93
   6   4  -5  316.07   35.05
  -6  -5   5 3708.10  407.76
  -6  -5   5 4396.17  483.00
   6   5  -5 4575.81  503.00
   6   5  -5 4165.69  458.26
  -6  -6   5  617.23   68.33
  -6  -6   5  733.49   81.04
   6   6  -5  617.90   68.47
   6   6  -5  738.57   81.48
  -6  -7   5 1135.14  125.17
  -6  -7   5 1074.47  118.60
   6   7  -5 1077.18  118.90
   6   7  -5 1247.67  137.41
  -6  -8   5  564.35   62.60
  -6  -8   5  537.57   59.55
   6   8  -5  660.61   72.91
   6   8  -5  522.32   58.10
  -6  -9   5  337.66   37.79
  -6  -9   5  344.71   38.40
   6   9  -5  337.76   37.52
   6   9  -5  308.75   34.74
  -6 -10   5   91.21   10.81
  -6 -10   5   90.36   11.25
   6  10  -5  103.11   12.20
   6  10  -5  103.82   12.71
  -6 -11   5    0.88    4.10
  -6 -11   5    4.95    2.88
   6  11  -5    8.88    3.63
   6  11  -5   11.52    4.64
  -6 -12   5  955.50  105.45
  -6 -12   5 1002.95  110.50
   6  12  -5 1063.62  117.17
   6  12  -5 1004.98  111.07
  -6 -13   5 2582.79  284.07
  -6 -13   5 2622.45  288.48
   6  13  -5 2300.11  253.26
   6  13  -5 2810.57  309.09
  -6 -14   5    4.81    3.08
  -6 -14   5    0.98    4.30
   6  14  -5   -1.19    3.46
   6  14  -5    5.32    5.05
  -6 -15   5  123.04   14.24
  -6 -15   5  141.21   16.07
   6  15  -5  130.43   15.56
   6  15  -5  135.21   15.52
  -5  16   5   46.88    8.47
   5 -16  -5   59.18    7.36
   5 -16  -5   49.08    6.81
  -5  15   5   52.50    8.91
   5 -15  -5   52.77    7.02
   5 -15  -5   43.66    6.54
  -5  14   5  201.13   23.29
   5 -14  -5  222.66   24.91
   5 -14  -5  216.45   24.37
  -5  13   5  394.20   44.20
   5 -13  -5  378.27   41.89
   5 -13  -5  345.73   38.37
  -5  12   5 1277.16  141.00
  -5  12   5 1558.83  171.78
   5 -12  -5 1395.11  153.54
   5 -12  -5 1374.44  151.27
  -5  11   5   95.21   11.80
  -5  11   5  123.72   15.42
   5 -11  -5   97.89   11.19
   5 -11  -5   96.91   11.22
  -5  10   5   60.94    8.81
  -5  10   5   54.37    7.52
   5 -10  -5   50.44    6.37
   5 -10  -5   43.35    5.36
  -5   9   5  167.88   19.08
  -5   9   5  158.53   18.40
   5  -9  -5  155.37   17.42
   5  -9  -5  149.99   16.71
  -5   8   5  541.98   59.93
  -5   8   5  576.21   63.65
   5  -8  -5  553.84   61.08
   5  -8  -5  519.95   57.32
  -5   7   5   76.57    8.91
  -5   7   5   79.55    9.52
   5  -7  -5   77.65    8.81
   5  -7  -5   73.31    8.27
  -5   6   5 3918.25  431.48
  -5   6   5 3982.65  438.94
   5  -5  -5  103.38   11.56
   5  -5  -5  126.19   14.10
   5  -2  -5 2282.14  252.55
  -5   1   5   41.01    4.98
  -5   1   5   31.15    4.14
   5  -1  -5   44.33    5.15
   5  -1  -5   50.94    5.90
  -5   0   5    3.53    2.30
  -5   0   5    8.71    2.61
   5   0  -5    1.97    1.36
   5   0  -5    5.39    1.83
  -5  -1   5   45.32    5.76
  -5  -1   5   52.64    6.64
   5   1  -5   54.91    6.64
   5   1  -5   40.00    4.81
  -5  -2   5 1852.02  203.74
  -5  -2   5 2199.78  242.01
   5   2  -5 2205.20  242.55
   5   2  -5 1967.60  216.35
  -5  -3   5 1036.17  114.16
  -5  -3   5  796.53   87.92
   5   3  -5 1036.85  114.26
   5   3  -5  938.21  103.28
  -5  -4   5  105.38   12.34
  -5  -4   5  105.96   12.30
   5   4  -5  122.29   13.90
   5   4  -5  104.29   12.34
  -5  -5   5  124.22   14.30
  -5  -5   5  121.41   14.30
   5   5  -5  126.02   14.37
   5   5  -5  136.36   15.83
  -5  -6   5 5094.41  559.94
  -5  -6   5 4962.22  545.71
   5   6  -5 5270.66  579.26
   5   6  -5 4735.12  520.63
  -5  -7   5   81.11   10.17
  -5  -7   5   85.65   10.20
   5   7  -5   92.74   10.78
   5   7  -5   80.40   10.03
  -5  -8   5  516.90   57.35
  -5  -8   5  523.34   57.93
   5   8  -5  594.52   65.62
   5   8  -5  492.15   54.77
   5   9  -5  170.69   19.79
   5   9  -5  200.18   22.47
  -5 -10   5   64.10    8.81
  -5 -10   5   62.30    7.83
   5  10  -5   48.61    7.15
   5  10  -5   58.71    7.42
  -5 -11   5   96.57   11.96
  -5 -11   5  102.97   12.03
   5  11  -5  147.04   16.81
   5  11  -5  115.14   14.03
  -5 -12   5 1838.80  202.45
  -5 -12   5 1456.80  160.39
   5  12  -5 1669.32  183.71
   5  12  -5 1814.73  200.01
  -5 -13   5  513.17   57.01
  -5 -13   5  446.06   49.42
   5  13  -5  474.19   53.08
   5  13  -5  433.85   48.06
  -5 -14   5  260.92   29.18
  -5 -14   5  262.99   29.73
   5  14  -5  244.48   27.93
   5  14  -5  273.53   30.57
  -5 -15   5   63.62    8.64
  -5 -15   5   64.94    8.07
   5  15  -5   59.08    8.71
   5  15  -5   60.71    7.76
  -5 -16   5   59.55    7.29
  -5 -16   5   72.91    9.32
   5  16  -5   72.13    9.97
   5  16  -5   57.15    7.39
  -4  16   5    6.75    6.30
   4 -16  -5    5.86    3.46
   4 -16  -5    4.27    3.83
  -4  15   5  719.25   79.79
   4 -15  -5  584.35   64.57
   4 -15  -5  511.14   56.54
  -4  14   5   65.99    9.83
   4 -14  -5   69.08    8.30
   4 -14  -5   65.89    8.37
  -4  13   5 2287.23  251.87
   4 -13  -5 1907.27  209.81
   4 -13  -5 1993.36  219.27
  -4  12   5  737.89   81.72
  -4  12   5  774.84   85.86
   4 -12  -5  676.54   74.64
   4 -12  -5  654.51   72.16
  -4  11   5  721.96   79.92
  -4  11   5  731.11   80.91
   4 -11  -5  545.03   60.16
   4 -11  -5  580.96   64.13
  -4  10   5  829.75   91.69
  -4  10   5  858.90   94.91
   4 -10  -5  702.30   77.42
   4 -10  -5  740.60   81.62
  -4   9   5 1024.64  113.01
  -4   9   5 1254.79  138.33
   4  -9  -5  782.29   86.16
   4  -9  -5  956.51  105.31
  -4   8   5  344.37   38.27
  -4   8   5  364.71   40.50
   4  -8  -5  247.09   27.35
   4  -8  -5  319.39   35.28
  -4   7   5   15.32    3.12
  -4   7   5   15.76    3.39
   4  -7  -5   11.29    2.24
   4  -7  -5   13.66    2.17
  -4   6   5  708.74   78.53
  -4   6   5  613.50   68.06
   4  -6  -5  640.61   70.87
   4  -6  -5  737.55   81.59
  -4   0   5   -0.14    1.90
  -4   0   5    3.05    2.00
   4   0  -5    2.51    1.15
   4   0  -5    3.42    1.49
   4   1  -5  774.50   85.31
   4   1  -5  868.73   95.58
   4   2  -5  430.80   47.62
   4   2  -5  581.64   64.06
  -4  -4   5    4.98    2.85
  -4  -4   5    1.22    2.85
   4   4  -5    4.24    2.30
   4   4  -5    2.98    3.02
   4   5  -5 2101.15  231.27
   4   5  -5 2816.33  309.63
  -4  -6   5  703.66   77.69
  -4  -6   5  534.52   59.25
   4   6  -5  668.75   74.03
   4   6  -5  760.26   83.79
  -4  -7   5   12.03    3.22
  -4  -7   5   14.74    4.98
   4   7  -5   13.73    3.29
   4   7  -5    9.97    3.69
  -4  -8   5  310.68   34.81
  -4  -8   5  287.67   32.06
   4   8  -5  334.37   37.11
   4   8  -5  269.70   30.44
  -4  -9   5 1003.63  110.80
  -4  -9   5  909.74  100.26
   4   9  -5  857.20   94.87
   4   9  -5  936.52  103.21
  -4 -10   5  882.96   97.72
  -4 -10   5  805.34   88.84
   4  10  -5  803.65   88.64
   4  10  -5  715.86   79.38
  -4 -11   5  643.33   71.04
  -4 -11   5  658.58   73.01
   4  11  -5  613.50   67.76
   4  11  -5  590.11   65.62
  -4 -12   5  731.11   80.70
  -4 -12   5  848.39   93.86
   4  12  -5  713.49   79.21
   4  12  -5  767.38   84.67
  -4 -13   5 2285.53  251.57
  -4 -13   5 2258.76  248.45
   4  13  -5 2357.73  259.74
   4  13  -5 2316.38  254.79
  -4 -14   5   78.43    9.49
  -4 -14   5   84.57   10.68
   4  14  -5   79.48    9.83
   4  14  -5   88.26   11.96
  -4 -15   5  805.68   88.87
  -4 -15   5  762.30   84.26
   4  15  -5  963.63  106.19
   4  15  -5  780.26   86.60
  -4 -16   5    8.88    3.19
  -4 -16   5    1.15    4.27
   4  16  -5    4.47    5.90
   4  16  -5    5.36    3.59
  -3  16   5  914.48  101.21
   3 -16  -5  915.50  100.91
   3 -16  -5  874.49   96.36
  -3  15   5  298.00   33.89
   3 -15  -5  295.56   32.91
   3 -15  -5  281.60   31.39
  -3  14   5   19.76    7.39
   3 -14  -5   10.98    3.25
   3 -14  -5    9.83    3.76
  -3  13   5 3070.54  337.86
  -3  13   5 2928.18  322.37
   3 -13  -5 2849.88  313.36
   3 -13  -5 2854.63  313.93
  -3  12   5 1374.10  151.54
  -3  12   5 1454.43  160.46
   3 -12  -5 1213.78  133.61
   3 -12  -5 1133.78  124.87
  -3  11   5  112.73   13.63
  -3  11   5  102.02   13.05
   3 -11  -5   77.72    9.12
   3 -11  -5   79.14    9.25
  -3  10   5  418.26   46.81
  -3  10   5  285.09   32.03
   3 -10  -5  282.11   31.29
   3 -10  -5  280.11   31.01
  -3   9   5  590.79   65.52
  -3   9   5  576.89   63.82
   3  -9  -5  424.70   46.88
   3  -9  -5  445.38   49.15
  -3   8   5  766.70   84.60
  -3   8   5  896.86   98.97
   3  -8  -5  695.86   76.67
   3  -8  -5  690.10   75.99
  -3   7   5  604.35   66.67
  -3   7   5  847.71   93.55
   3  -7  -5  637.22   70.20
   3  -7  -5  729.76   80.36
  -3   0   5    2.44    2.30
  -3   0   5    1.86    1.69
   3   0  -5    3.97    1.32
   3   0  -5    3.66    1.66
  -3  -1   5 5890.94  647.73
  -3  -1   5 5928.22  651.80
   3   1  -5 5796.03  637.22
  -3  -2   5  305.90   34.00
  -3  -2   5  330.34   36.61
   3   2  -5  334.07   37.05
   3   2  -5  316.54   34.95
  -3  -3   5  147.41   16.85
  -3  -3   5  166.39   18.71
   3   3  -5  188.05   20.91
   3   3  -5  189.34   21.32
  -3  -4   5  396.57   43.93
  -3  -4   5  265.77   29.76
   3   4  -5  409.79   45.25
   3   4  -5  390.47   43.39
   3   5  -5 2738.71  301.33
   3   5  -5 3423.39  376.23
  -3  -6   5    3.08    3.59
  -3  -6   5    1.39    2.37
   3   6  -5    3.90    3.53
   3   6  -5    4.44    2.34
   3   7  -5  520.29   57.45
   3   7  -5  404.03   45.11
  -3  -8   5  618.58   68.30
  -3  -8   5  446.73   49.79
   3   8  -5  453.18   50.54
   3   8  -5  585.70   64.64
  -3  -9   5  353.18   39.72
  -3  -9   5  397.59   44.03
   3   9  -5  385.72   42.71
   3   9  -5  329.90   37.18
  -3 -10   5  274.38   30.54
  -3 -10   5  304.04   34.40
   3  10  -5  283.26   32.23
   3  10  -5  265.63   29.56
  -3 -11   5   81.38   10.64
  -3 -11   5   79.72    9.52
   3  11  -5   74.64    9.02
   3  11  -5   96.63   12.44
  -3 -12   5 1223.27  134.77
  -3 -12   5 1358.51  149.88
   3  12  -5 1102.60  121.45
   3  12  -5 1179.88  130.43
   3  13  -5 3691.16  406.40
   3  13  -5 3070.54  337.63
  -3 -14   5   16.20    4.85
  -3 -14   5   11.69    3.36
   3  14  -5   18.30    6.27
   3  14  -5   12.24    3.83
  -3 -15   5  318.31   35.42
  -3 -15   5  331.32   37.18
   3  15  -5  316.44   35.32
   3  15  -5  325.29   36.81
  -3 -16   5  988.38  109.01
  -3 -16   5 1203.27  132.50
   3  16  -5 1017.53  112.53
   3  16  -5 1413.76  155.58
  -2  16   5   55.11    9.59
   2 -16  -5   60.54    7.56
   2 -16  -5   61.35    7.59
  -2  15   5   47.25    8.68
   2 -15  -5   40.10    5.73
   2 -15  -5   40.57    5.66
  -2  14   5  154.22   18.24
  -2  14   5  165.92   20.03
   2 -14  -5  145.04   16.41
   2 -14  -5  148.73   16.88
  -2  13   5  957.53  105.75
  -2  13   5 1153.44  127.55
   2 -13  -5  897.20   98.87
   2 -13  -5  763.65   84.16
  -2  12   5  935.50  103.35
  -2  12   5 1087.35  120.19
   2 -12  -5  911.10  100.36
   2 -12  -5  961.60  105.96
  -2  11   5   43.86    7.08
  -2  11   5   56.10    8.88
   2 -11  -5   43.59    5.63
   2 -11  -5   37.49    4.91
  -2  10   5  193.23   22.03
  -2  10   5  208.42   24.03
   2 -10  -5  158.80   17.83
   2 -10  -5  161.78   18.10
  -2   9   5  117.28   14.30
  -2   9   5   97.55   11.73
   2  -9  -5   83.55    9.66
   2  -9  -5   80.91    9.22
  -2   8   5  451.82   50.10
  -2   8   5  554.86   61.45
   2  -8  -5  438.94   48.50
   2  -8  -5  428.43   47.25
  -2   7   5   42.54    6.00
  -2   7   5   26.88    4.24
   2  -7  -5   37.96    4.68
   2  -7  -5   30.91    3.83
  -2   5   5   21.01    3.19
  -2   5   5   23.96    3.59
   2  -5  -5   24.98    3.02
   2  -5  -5   20.44    2.64
  -2   4   5  136.73   15.32
  -2   4   5  121.45   13.59
   2  -4  -5  114.63   12.71
   2  -4  -5  133.38   14.78
  -2   3   5  741.28   81.92
  -2   3   5  535.88   59.21
   2  -3  -5  425.72   47.01
   2  -3  -5  596.89   65.89
   2   0  -5    3.29    1.42
   2   0  -5    3.02    1.73
  -2  -1   5  621.97   68.57
  -2  -1   5  653.16   72.06
   2   1  -5  600.62   66.26
   2   1  -5  559.27   61.59
  -2  -2   5 4335.16  476.56
  -2  -2   5 4433.46  487.41
   2   2  -5 3955.54  434.53
   2   2  -5 4399.56  483.68
  -2  -3   5  515.54   56.98
  -2  -3   5  521.64   57.79
   2   3  -5  579.60   64.20
   2   3  -5  514.52   56.71
   2   4  -5  123.38   13.90
   2   4  -5   95.72   11.42
  -2  -5   5   33.52    4.98
  -2  -5   5   21.69    4.85
   2   5  -5   26.37    4.91
   2   5  -5   29.59    4.14
  -2  -6   5 5704.51  626.72
  -2  -6   5 4165.69  458.26
   2   6  -5 5450.30  598.92
   2   6  -5 3823.35  420.30
  -2  -7   5   27.18    4.17
  -2  -7   5   16.34    5.15
   2   7  -5   34.37    6.03
   2   7  -5   27.83    4.24
  -2  -8   5  437.92   48.47
  -2  -8   5  333.53   37.49
  -2  -9   5   70.81    8.44
  -2  -9   5   50.67    7.49
   2   9  -5   44.06    7.08
   2   9  -5   66.67    8.03
  -2 -10   5  138.12   15.69
  -2 -10   5  108.70   13.56
  -2 -11   5   54.77    6.78
  -2 -11   5   35.86    6.20
   2  11  -5   41.72    5.66
   2  11  -5   24.88    6.00
  -2 -12   5  725.69   79.99
  -2 -12   5  860.93   95.28
   2  12  -5  799.58   88.16
   2  12  -5  713.83   79.38
  -2 -13   5  866.69   95.48
  -2 -13   5  893.81   98.80
   2  13  -5  859.91   94.80
   2  13  -5  670.10   74.60
  -2 -14   5  159.41   17.96
  -2 -14   5  185.61   21.49
   2  14  -5  165.07   18.68
   2  14  -5  153.98   18.81
  -2 -15   5   59.01    7.32
  -2 -15   5   43.11    7.42
   2  15  -5   44.74    6.17
   2  15  -5   50.84    8.95
   2  16  -5   59.42    7.66
   2  16  -5   69.96   10.34
  -1  16   5   69.42   11.52
   1 -16  -5   79.55    9.42
   1 -16  -5   73.65    8.81
  -1  15   5  216.11   24.74
  -1  15   5  281.53   32.30
   1 -15  -5  294.82   32.78
   1 -15  -5  280.07   31.18
  -1  14   5   97.52   12.24
  -1  14   5  150.80   18.64
   1 -14  -5  129.21   14.78
   1 -14  -5  120.94   13.80
  -1  13   5  715.86   79.21
  -1  13   5  880.25   97.58
   1 -13  -5  707.39   78.03
   1 -13  -5  673.49   74.26
  -1  12   5 1552.73  171.34
  -1  12   5 1368.68  150.90
   1 -12  -5 1303.26  143.48
   1 -12  -5 1048.37  115.41
  -1  11   5  151.92   18.27
  -1  11   5  158.22   18.44
   1 -11  -5  119.51   13.59
   1 -11  -5  114.77   13.02
  -1  10   5  907.37  100.43
  -1  10   5  766.70   84.67
   1 -10  -5  748.06   82.50
   1 -10  -5  652.14   71.86
  -1   9   5 1181.92  130.56
  -1   9   5 1061.93  117.07
   1  -9  -5  964.31  106.23
   1  -9  -5  847.71   93.35
  -1   8   5  813.82   90.02
  -1   8   5  681.63   75.35
   1  -8  -5  709.42   78.20
   1  -8  -5  609.43   67.15
  -1   7   5    4.85    4.54
  -1   7   5    2.30    2.91
   1  -7  -5    3.25    2.27
   1  -7  -5    1.80    1.90
   1  -6  -5 1093.11  120.33
   1  -6  -5 1154.12  127.00
   1  -5  -5 1315.12  144.66
   1  -5  -5  935.50  102.97
  -1   4   5   24.34    3.73
  -1   4   5   22.57    3.90
   1  -4  -5   22.40    3.02
   1  -4  -5   25.29    3.22
  -1   3   5  284.31   31.62
  -1   3   5  281.60   31.32
   1  -3  -5  249.70   27.59
   1  -3  -5  286.31   31.62
  -1   2   5  360.64   39.96
  -1   2   5  246.52   27.52
   1  -2  -5  507.75   55.96
   1  -2  -5  417.59   46.03
  -1   0   5   11.02    3.29
  -1   0   5    8.41    2.98
   1   0  -5    2.34    2.00
   1   0  -5    5.52    1.93
  -1  -1   5 1274.11  140.43
  -1  -1   5 1553.07  171.00
   1   1  -5 1599.84  176.05
   1   1  -5 1219.20  134.12
  -1  -2   5  574.18   63.59
  -1  -2   5  526.05   58.20
   1   2  -5  526.05   57.99
   1   2  -5  518.93   57.45
  -1  -3   5  309.29   34.40
  -1  -3   5  299.39   33.52
   1   3  -5  313.19   35.05
   1   3  -5  302.88   33.52
  -1  -4   5   30.91    4.91
  -1  -4   5   26.37    5.49
   1   4  -5   27.15    5.19
   1   4  -5   35.28    4.68
  -1  -5   5 1553.40  171.20
  -1  -5   5 1647.97  181.34
   1   5  -5 1617.13  177.85
   1   5  -5 1467.31  161.71
  -1  -6   5 1409.01  155.41
  -1  -6   5 1578.15  173.71
   1   6  -5 1356.81  149.75
   1   6  -5 1446.30  159.14
   1   7  -5    4.85    4.91
   1   7  -5    4.78    2.78
  -1  -8   5  649.77   72.20
  -1  -8   5  733.82   81.01
   1   8  -5  478.94   53.49
   1   8  -5  716.20   78.98
  -1  -9   5  986.00  108.70
  -1  -9   5  786.36   87.18
   1   9  -5  805.34   89.35
   1   9  -5  985.66  108.60
  -1 -10   5  590.45   65.72
  -1 -10   5  733.82   81.01
   1  10  -5  688.41   75.96
   1  10  -5  502.32   56.20
  -1 -11   5  105.72   13.22
  -1 -11   5   66.40    8.03
  -1 -12   5  993.12  109.34
  -1 -12   5 1180.56  130.36
   1  12  -5 1060.57  117.41
   1  12  -5 1065.66  117.38
  -1 -13   5  708.74   78.60
  -1 -13   5  644.34   71.08
   1  13  -5  629.77   70.20
   1  13  -5  660.61   72.91
  -1 -14   5  120.94   13.76
  -1 -14   5  145.34   17.12
   1  14  -5   98.43   12.95
   1  14  -5  116.63   13.46
  -1 -15   5  333.05   37.39
  -1 -15   5  297.46   33.01
   1  15  -5  277.46   30.91
   1  15  -5  225.88   26.30
  -1 -16   5   83.28    9.73
  -1 -16   5   90.19   11.25
   1  16  -5   77.11   10.61
   1  16  -5   71.15    8.68
   0  16   5  836.19   92.36
   0  16   5  834.15   92.63
   0 -16  -5  923.30  101.72
   0 -16  -5 1060.57  116.77
   0  15   5  356.91   40.00
   0  15   5  415.55   46.98
   0 -15  -5  474.53   52.47
   0 -15  -5  465.72   51.45
   0  14   5   31.62    6.13
   0  14   5   22.78    7.25
   0 -14  -5   34.06    4.81
   0 -14  -5   29.45    4.37
   0  13   5 2877.68  316.95
   0  13   5 3026.82  332.95
   0 -13  -5 3183.07  350.13
   0 -13  -5 2688.88  295.63
   0  12   5  696.88   77.48
   0  12   5  639.60   70.81
   0 -12  -5  560.96   61.89
   0 -12  -5  660.61   72.91
   0  11   5  243.50   27.56
   0  11   5  232.45   26.98
   0 -11  -5  239.33   26.68
   0 -11  -5  180.35   20.13
   0  10   5  309.26   34.57
   0  10   5  288.78   32.91
   0 -10  -5  295.36   32.81
   0 -10  -5  251.30   27.93
   0   9   5  637.22   70.81
   0   9   5  637.90   70.54
   0  -9  -5  561.98   61.96
   0  -9  -5  627.06   69.18
   0   8   5  650.10   72.09
   0   8   5  571.13   63.32
   0  -8  -5  633.16   69.89
   0  -8  -5  547.40   60.37
   0   7   5  128.56   15.35
   0   7   5  133.61   15.46
   0  -7  -5  138.87   15.63
   0  -7  -5  122.33   13.76
   0  -6  -5   68.84    8.07
   0  -6  -5   91.82   10.54
   0  -5  -5 2198.76  241.74
   0  -5  -5 2038.44  224.18
   0  -4  -5  295.09   32.64
   0  -4  -5  439.96   48.57
   0   3   5    6.98    3.53
   0   3   5    6.27    3.42
   0  -3  -5   10.07    2.37
   0  -3  -5    7.83    2.27
   0  -2  -5  157.58   17.59
   0  -2  -5  237.84   26.40
   0  -1  -5 4267.37  469.11
   0  -1  -5 3209.85  352.85
   0   0   5    1.46    3.36
   0   0   5    2.17    3.29
   0   0  -5   11.49    2.64
   0   0  -5    2.61    2.85
   0  -1   5 5735.02  630.45
   0  -1   5 4236.86  466.06
   0   1  -5 4863.92  534.52
   0   1  -5 4419.90  486.05
   0  -2   5  248.48   28.13
   0  -2   5  296.48   33.12
   0   2  -5  255.30   28.61
   0   2  -5  281.23   31.18
   0  -3   5   14.17    4.07
   0  -3   5    9.42    4.81
   0   3  -5   10.47    2.85
   0   3  -5    6.10    3.19
   0  -4   5  573.84   63.49
   0  -4   5  532.49   59.21
   0   4  -5  563.33   62.16
   0   4  -5  470.12   52.23
   0  -5   5 3232.90  355.56
   0  -5   5 3361.02  369.79
   0   5  -5 2726.51  300.11
   0   5  -5 3071.90  337.73
   0  -6   5  107.92   13.29
   0  -6   5   94.91   11.15
   0   6  -5   91.31   11.83
   0   6  -5   99.89   11.59
   0  -7   5  166.63   18.95
   0  -7   5  169.41   20.07
   0   7  -5  181.91   20.44
   0   7  -5  191.17   22.37
   0  -8   5  681.29   75.25
   0  -8   5  678.92   75.45
   0   8  -5  705.35   77.79
   0   8  -5  610.79   67.99
   0  -9   5  682.30   75.35
   0  -9   5  602.65   67.18
   0   9  -5  557.57   62.26
   0   9  -5  720.94   79.52
   0 -10   5  322.00   35.83
   0 -10   5  290.28   33.05
   0  10  -5  269.67   30.84
   0  10  -5  330.00   36.64
   0 -11   5  218.08   25.42
   0 -11   5  205.00   23.01
   0  11  -5  245.77   27.45
   0  11  -5  184.25   21.62
   0 -12   5  589.09   65.08
   0 -12   5  605.70   67.45
   0  12  -5  581.30   64.87
   0  12  -5  616.21   67.99
   0 -13   5 2751.93  302.61
   0 -13   5 2817.68  310.14
   0  13  -5 2978.69  327.49
   0  13  -5 2454.67  270.52
   0  14  -5   29.56    6.68
   0  14  -5   25.79    4.41
   0 -15   5  477.92   52.81
   0 -15   5  598.58   66.37
   0 -16   5 1048.37  115.41
   0 -16   5 1146.33  126.33
   0  16  -5  980.92  108.02
   0  16  -5  855.17   94.63
   1  16   5  130.87   15.59
   1  16   5   80.16   13.05
  -1 -16  -5  112.29   12.81
  -1 -16  -5  116.77   13.32
   1  15   5    9.83    4.88
   1  15   5    7.76    6.78
  -1 -15  -5   11.66    2.81
  -1 -15  -5    6.30    3.12
   1  14   5   80.84   10.41
   1  14   5   57.86    9.86
  -1 -14  -5   88.06   10.17
  -1 -14  -5   85.25   10.00
   1  13   5  789.41   87.18
   1  13   5  582.99   65.18
  -1 -13  -5  687.05   75.72
  -1 -13  -5  758.23   83.62
   1  12   5  606.38   67.11
   1  12   5  462.33   52.03
  -1 -12  -5  474.87   52.47
  -1 -12  -5  526.73   58.16
   1  11   5    7.52    4.10
   1  11   5    5.90    6.17
  -1 -11  -5    6.44    2.68
  -1 -11  -5    2.17    2.68
   1  10   5  274.11   30.78
   1  10   5  229.16   26.64
  -1 -10  -5  226.35   25.22
  -1 -10  -5  256.92   28.61
   1   9   5   80.60   10.07
   1   9   5   70.23   10.13
  -1  -9  -5   68.54    8.10
  -1  -9  -5   76.53    9.02
   1   8   5  393.52   43.83
   1   8   5  390.13   43.83
  -1  -8  -5  399.62   44.20
  -1  -8  -5  419.28   46.37
   1   7   5  229.81   25.96
   1   7   5  288.62   32.84
  -1  -7  -5  272.18   30.23
  -1  -7  -5  231.16   25.76
   1   6   5 4494.47  494.19
   1   6   5 3009.19  330.98
  -1  -6  -5 2734.30  300.61
  -1  -6  -5 3453.89  379.62
   1   5   5  376.91   41.93
   1   5   5  504.70   56.30
  -1  -5  -5  436.23   48.20
  -1  -5  -5  391.49   43.28
  -1  -4  -5   52.27    6.37
  -1  -4  -5   80.16    9.35
   1   3   5   55.79    7.90
   1   3   5   57.15    7.76
  -1  -3  -5   75.89    8.95
  -1  -3  -5   51.25    6.34
   1   2   5 3081.73  338.95
   1   2   5 2228.25  245.37
  -1  -2  -5 2517.38  276.79
  -1  -2  -5 3195.95  351.49
   1   1   5 1122.26  123.95
   1   1   5 1155.82  127.48
  -1  -1  -5 1103.28  121.48
  -1  -1  -5 1082.26  119.21
   1   0   5    0.71    4.37
   1   0   5    2.07    4.24
  -1   0  -5    2.75    2.54
  -1   0  -5   10.68    3.32
   1  -1   5 1147.00  126.56
   1  -1   5 1383.93  152.59
  -1   1  -5 1279.19  140.80
  -1   1  -5 1173.10  129.24
   1  -2   5 4579.20  503.68
   1  -2   5 4362.28  479.61
  -1   2  -5 4528.36  497.92
  -1   2  -5 4348.72  478.26
   1  -3   5   84.67   10.34
   1  -3   5   82.87   10.91
  -1   3  -5   77.75    9.73
  -1   3  -5   80.03    9.49
   1  -4   5  100.50   12.74
   1  -4   5   83.42   10.17
  -1   4  -5   90.50   10.64
  -1   4  -5  101.85   12.41
   1  -5   5  599.26   66.67
   1  -5   5  569.10   62.98
  -1   5  -5  543.34   60.03
  -1   5  -5  586.72   65.21
   1  -6   5 5311.33  584.01
   1  -6   5 4677.50  514.52
  -1   6  -5 5185.92  570.11
  -1   6  -5 5433.35  597.57
   1  -7   5  368.10   41.56
   1  -7   5  306.55   34.23
  -1   7  -5  339.97   38.44
  -1   7  -5  328.44   36.50
   1  -8   5  602.31   67.11
   1  -8   5  536.90   59.45
  -1   8  -5  512.15   57.21
  -1   8  -5  420.97   46.61
   1  -9   5   81.25    9.66
   1  -9   5   81.11   11.12
  -1   9  -5   94.50   11.08
  -1   9  -5   96.74   12.64
   1 -10   5  296.11   32.95
   1 -10   5  294.45   33.59
  -1  10  -5  298.85   33.25
  -1  10  -5  303.87   34.71
   1 -11   5    4.14    5.22
   1 -11   5    5.90    2.91
  -1  11  -5   -1.90    5.90
  -1  11  -5   11.46    2.95
   1 -12   5  560.62   62.50
   1 -12   5  503.34   55.69
  -1  12  -5  561.64   62.81
  -1  12  -5  560.96   61.96
   1 -13   5  746.71   82.36
   1 -13   5  787.04   87.11
  -1  13  -5  809.41   89.25
  -1  13  -5  733.82   81.55
   1 -14   5   93.75   10.81
   1 -14   5   95.45   12.27
  -1  14  -5   87.35   11.90
  -1  14  -5   97.31   11.35
   1 -15   5    2.71    4.91
   1 -15   5    9.86    2.81
  -1  15  -5    4.91    5.73
  -1  15  -5    5.36    2.98
   1 -16   5  146.43   17.02
   1 -16   5  133.61   15.02
  -1  16  -5  125.85   15.42
  -1  16  -5  134.50   15.46
  -2 -15  -5   72.87    8.68
  -2 -15  -5   65.62    7.83
   2  14   5   62.98   10.07
   2  14   5   63.79    8.34
  -2 -14  -5   53.01    6.51
  -2 -14  -5   70.54    8.58
   2  13   5   69.38    9.29
   2  13   5   40.67    8.68
  -2 -13  -5   71.93    8.74
  -2 -13  -5   67.59    8.13
   2  12   5 1141.58  125.89
   2  12   5  839.58   93.31
  -2 -12  -5 1178.53  129.78
  -2 -12  -5 1035.83  114.06
   2  11   5    5.19    4.17
   2  11   5   10.27    6.78
  -2 -11  -5    7.19    2.51
  -2 -11  -5    0.17    2.64
   2  10   5  223.81   26.03
   2  10   5  276.68   31.01
  -2 -10  -5  284.04   31.59
  -2 -10  -5  248.28   27.62
   2   9   5  610.45   68.09
   2   9   5  675.86   74.81
  -2  -9  -5  653.83   72.13
  -2  -9  -5  631.12   69.65
   2   8   5  600.96   66.64
   2   8   5  700.95   77.92
  -2  -8  -5  660.95   72.94
  -2  -8  -5  592.48   65.45
   2   7   5   25.56    6.64
   2   7   5   26.61    5.25
  -2  -7  -5   34.67    4.81
  -2  -7  -5   22.91    3.76
   2   6   5 1056.84  116.56
   2   6   5 1287.67  142.36
  -2  -6  -5 1056.50  116.36
  -2  -6  -5 1051.42  115.79
   2   5   5  772.80   85.99
   2   5   5  664.68   73.52
  -2  -5  -5  638.24   70.43
  -2  -5  -5  635.53   70.13
   2   4   5   75.89   10.54
   2   4   5   76.87    9.66
  -2  -4  -5   74.23    8.78
  -2  -4  -5   80.36    9.42
   2   3   5  383.35   43.05
   2   3   5  478.94   53.28
  -2  -3  -5  460.97   50.94
  -2  -3  -5  372.51   41.32
   2   2   5   14.54    3.93
   2   2   5   10.85    4.61
  -2  -2  -5   17.12    3.59
  -2  -2  -5   25.79    4.10
   2   1   5 1153.11  127.44
   2   1   5  828.39   91.58
  -2  -1  -5 1061.93  117.01
  -2  -1  -5  821.27   90.57
   2   0   5   -5.22    4.41
   2   0   5   -1.93    4.81
  -2   0  -5    3.90    2.98
  -2   0  -5    1.42    3.19
   2  -1   5 1027.69  113.65
   2  -1   5 1027.02  113.34
  -2   1  -5 1043.29  114.97
  -2   1  -5 1163.95  128.29
   2  -2   5   24.20    5.02
   2  -2   5   27.52    5.49
  -2   2  -5   41.49    5.97
  -2   2  -5   41.01    5.97
   2  -3   5  668.07   73.89
   2  -3   5  703.32   78.03
  -2   3  -5  744.67   82.20
  -2   3  -5  744.33   82.30
   2  -4   5  101.52   12.20
   2  -4   5   92.70   12.27
  -2   4  -5  115.79   14.10
  -2   4  -5  111.34   12.91
   2  -5   5 1043.96  115.21
   2  -5   5  899.23   99.58
  -2   5  -5  912.79  100.94
  -2   5  -5  746.37   82.36
   2  -6   5 1321.90  145.75
   2  -6   5 1572.05  173.44
  -2   6  -5 1303.26  143.48
  -2   6  -5 1540.18  169.81
   2  -7   5   36.27    5.63
   2  -7   5   40.61    7.93
   2  -8   5  865.34   95.89
   2  -8   5  893.47   98.63
  -2   8  -5  933.13  102.87
  -2   8  -5  754.50   83.62
   2  -9   5  773.48   85.35
   2  -9   5  819.24   90.74
  -2   9  -5  758.23   84.06
  -2   9  -5  839.92   92.57
   2 -10   5  398.27   44.61
   2 -10   5  316.82   35.25
  -2  10  -5  354.88   40.00
  -2  10  -5  337.93   37.49
   2 -11   5    4.10    2.58
   2 -11   5   -0.61    5.22
  -2  11  -5    9.35    2.85
  -2  11  -5    7.39    5.49
   2 -12   5 1276.14  140.49
   2 -12   5 1351.39  149.07
  -2  12  -5 1284.28  141.85
  -2  12  -5 1195.13  131.58
   2 -13   5  102.74   12.68
   2 -13   5   82.03    9.80
  -2  13  -5   89.28   11.76
  -2  13  -5   85.86   10.30
   2 -14   5   68.77    9.22
   2 -14   5   59.08    7.52
  -2  14  -5   81.25   10.91
  -2  14  -5   67.82    8.37
   2 -15   5   84.81   10.51
   2 -15   5   78.57    9.22
  -2  15  -5   78.03   10.41
  -2  15  -5   80.09    9.49
   3  14   5   27.12    8.51
   3  14   5   46.27    7.02
  -3 -14  -5   42.06    5.52
  -3 -14  -5   49.93    6.41
   3  13   5 1933.70  212.86
   3  13   5 1385.62  153.07
  -3 -13  -5 1657.80  182.39
  -3 -13  -5 1933.70  212.76
   3  12   5   97.89   13.39
   3  12   5  107.65   12.98
  -3 -12  -5  100.43   11.66
  -3 -12  -5  103.55   12.00
   3  11   5  338.92   37.86
   3  11   5  295.06   33.89
  -3 -11  -5  326.24   36.20
  -3 -11  -5  346.74   38.50
   3  10   5  198.01   23.46
   3  10   5  193.61   22.07
  -3 -10  -5  228.82   25.56
  -3 -10  -5  191.81   21.56
   3   9   5  640.27   70.87
   3   9   5  684.68   76.43
  -3  -9  -5  685.36   75.62
  -3  -9  -5  585.70   64.71
   3   8   5  342.00   38.84
   3   8   5  282.07   31.76
  -3  -8  -5  291.73   32.51
  -3  -8  -5  293.56   32.64
   3   7   5    1.69    5.90
   3   7   5    1.80    3.90
  -3  -7  -5    3.32    2.78
  -3  -7  -5    0.64    2.78
   3   6   5  199.61   22.71
   3   6   5  202.05   23.79
  -3  -6  -5  184.59   20.74
  -3  -6  -5  225.84   25.22
   3   5   5 2039.12  224.49
   3   5   5 1778.81  196.32
  -3  -5  -5 2070.98  227.77
  -3  -5  -5 1537.81  169.24
   3   4   5  222.38   25.35
   3   4   5  152.19   18.61
  -3  -4  -5  224.38   25.12
  -3  -4  -5  174.80   19.73
   3   3   5    4.88    3.83
   3   3   5    6.54    6.00
  -3  -3  -5    8.78    2.71
  -3  -3  -5    7.80    3.05
  -3  -2  -5  161.54   18.24
  -3  -2  -5  111.95   12.95
  -3  -1  -5 1256.15  138.36
  -3  -1  -5 1872.69  206.05
   3   0   5    3.02    4.14
   3   0   5   -3.25    4.64
  -3   0  -5   -0.41    2.78
  -3   0  -5    1.66    2.75
   3  -1   5 1633.40  179.95
   3  -1   5 1816.77  200.29
  -3   1  -5 1639.16  180.49
  -3   1  -5 1484.94  163.48
   3  -2   5  166.97   19.22
   3  -2   5  159.61   18.74
  -3   2  -5  147.41   17.02
  -3   2  -5  153.82   17.59
   3  -3   5   11.49    3.83
   3  -3   5    7.36    5.12
  -3   3  -5   10.51    3.39
  -3   3  -5   10.47    4.30
   3  -4   5  244.99   27.66
   3  -4   5  254.28   29.05
  -3   4  -5  282.21   31.79
  -3   4  -5  247.70   27.73
   3  -5   5 2157.07  237.50
   3  -5   5 2451.62  270.01
  -3   5  -5 2174.02  239.20
  -3   5  -5 3018.34  332.14
   3  -6   5  233.16   26.37
   3  -6   5  239.30   27.56
  -3   6  -5  233.91   26.20
  -3   6  -5  327.59   36.84
  -3   7  -5    7.63    3.08
  -3   7  -5    3.86    4.81
   3  -8   5  424.36   47.18
   3  -8   5  410.81   46.00
  -3   8  -5  428.09   47.93
  -3   8  -5  484.70   53.69
   3  -9   5  961.26  106.26
   3  -9   5  768.06   84.84
  -3   9  -5  939.23  103.85
  -3   9  -5  967.70  106.67
   3 -10   5  224.11   25.15
   3 -10   5  264.89   30.23
  -3  10  -5  264.01   29.42
  -3  10  -5  244.99   28.03
   3 -11   5  397.25   44.00
   3 -11   5  431.14   48.13
  -3  11  -5  365.73   40.54
  -3  11  -5  431.82   48.23
   3 -12   5  106.70   12.41
   3 -12   5  149.75   17.69
  -3  12  -5  113.24   14.03
  -3  12  -5  120.73   13.96
   3 -13   5 2131.99  234.52
   3 -13   5 2062.84  227.06
  -3  13  -5 2121.82  233.33
  -3  13  -5 1967.94  216.69
   3 -14   5   46.71    6.10
   3 -14   5   58.37    8.17
  -3  14  -5   54.13    7.80
  -3  14  -5   51.52    6.54
   4  13   5  553.84   61.35
   4  13   5  510.46   57.45
  -4 -13  -5  525.71   58.03
  -4 -13  -5  547.40   60.43
   4  12   5  480.29   53.32
   4  12   5  389.45   44.03
  -4 -12  -5  439.62   48.67
  -4 -12  -5  434.53   48.03
   4  11   5    9.22    3.80
   4  11   5   11.86    6.64
  -4 -11  -5    9.59    3.12
  -4 -11  -5    8.85    2.81
   4  10   5  441.31   49.08
   4  10   5  441.31   49.99
  -4 -10  -5  444.36   49.22
  -4 -10  -5  449.79   49.76
   4   9   5   19.56    4.20
   4   9   5   31.86    8.47
  -4  -9  -5   18.40    3.93
  -4  -9  -5   17.73    3.49
   4   8   5  485.38   53.96
   4   8   5  519.27   58.33
  -4  -8  -5  566.05   62.54
  -4  -8  -5  500.63   55.38
   4   7   5  603.33   66.84
   4   7   5  462.33   51.99
  -4  -7  -5  491.48   54.37
  -4  -7  -5  573.84   63.42
  -4  -6  -5 1946.58  214.18
  -4  -6  -5 1323.26  145.68
  -4  -5  -5  595.19   65.72
  -4  -5  -5  894.49   98.63
   4   4   5  110.02   13.19
   4   4   5   79.08   11.66
  -4  -4  -5  100.77   11.73
  -4  -4  -5   92.63   10.98
   4   3   5   24.07    4.88
   4   3   5   36.95    7.46
  -4  -3  -5   31.25    4.64
  -4  -3  -5   37.35    5.19
   4   2   5 2277.74  250.72
   4   2   5 3084.10  339.63
  -4  -2  -5 2970.89  326.68
  -4  -2  -5 2372.31  260.92
   4   0   5    5.02    3.29
   4   0   5   -2.37    5.02
  -4   0  -5    4.85    3.15
  -4   0  -5   16.20    3.49
  -4   1  -5 1489.00  163.98
  -4   1  -5 1153.11  127.04
   4  -2   5 2232.66  245.77
   4  -2   5 3018.34  332.37
  -4   2  -5 2665.50  293.33
  -4   2  -5 2157.41  237.37
   4  -3   5   27.18    5.08
   4  -3   5   35.96    6.88
  -4   3  -5   35.25    5.97
  -4   3  -5   27.49    4.71
   4  -4   5  117.99   14.13
   4  -4   5  126.53   15.35
  -4   4  -5  118.90   14.20
  -4   4  -5  117.21   13.73
   4  -5   5  841.95   93.04
   4  -5   5  914.82  101.21
  -4   5  -5  983.29  108.46
  -4   5  -5 1001.26  110.50
  -4   6  -5 1792.02  197.23
  -4   6  -5 2205.54  242.79
   4  -8   5  622.65   68.98
   4  -8   5  602.99   67.01
  -4   8  -5  650.44   71.86
  -4   8  -5  729.76   80.87
   4  -9   5   33.66    7.56
   4  -9   5   20.74    4.47
  -4   9  -5   33.28    5.29
  -4   9  -5   33.05    6.68
   4 -10   5  571.47   63.18
   4 -10   5  601.30   66.81
  -4  10  -5  618.24   68.26
  -4  10  -5  635.87   70.54
   4 -11   5   14.54    3.42
   4 -11   5   13.93    5.25
  -4  11  -5   15.29    5.22
  -4  11  -5   11.29    3.63
   4 -12   5  634.85   70.30
   4 -12   5  601.97   66.50
  -4  12  -5  600.28   66.50
  -4  12  -5  571.13   63.04
   4 -13   5  662.31   73.28
   4 -13   5  615.19   67.86
  -4  13  -5  671.80   74.30
  -4  13  -5  672.81   74.16
   5  12   5  423.35   47.66
   5  12   5  542.66   60.06
  -5 -12  -5  554.18   61.18
  -5 -12  -5  525.37   57.99
   5  11   5   43.96    9.63
   5  11   5   58.43    7.69
  -5 -11  -5   48.40    6.20
  -5 -11  -5   57.99    7.29
   5  10   5   35.59    9.02
   5  10   5   25.96    5.32
  -5 -10  -5   30.74    4.75
  -5 -10  -5   31.52    4.78
   5   9   5  424.36   48.06
   5   9   5  483.68   53.66
  -5  -9  -5  404.03   44.74
  -5  -9  -5  499.27   55.18
   5   8   5  365.05   41.72
   5   8   5  438.26   48.64
  -5  -8  -5  470.12   51.99
  -5  -8  -5  365.73   40.61
   5   7   5  109.55   12.95
   5   7   5   73.82   10.81
  -5  -7  -5  118.50   13.59
  -5  -7  -5   83.42   10.03
  -5  -6  -5  886.69   97.75
  -5  -6  -5 1318.17  145.10
  -5  -5  -5  424.70   47.08
  -5  -5  -5  549.78   60.81
   5   4   5   94.36   13.22
   5   4   5  104.46   12.54
  -5  -4  -5   75.65    9.12
  -5  -4  -5  103.41   12.10
   5   3   5 1147.34  126.60
   5   3   5 1282.92  141.88
  -5  -3  -5 1050.06  115.72
  -5  -3  -5 1168.70  128.77
   5   2   5  321.63   36.44
   5   2   5  263.02   29.59
  -5  -2  -5  323.46   36.03
  -5  -2  -5  269.19   30.03
   5   1   5  438.94   48.81
   5   1   5  537.57   59.89
  -5  -1  -5  496.90   54.98
  -5  -1  -5  392.50   43.55
   5   0   5   -2.51    4.98
   5   0   5   -0.37    3.32
  -5   0  -5    1.25    2.98
  -5   0  -5   -1.15    3.39
   5  -2   5  292.51   33.18
   5  -2   5  285.70   32.17
  -5   2  -5  200.18   22.68
  -5   2  -5  274.01   30.71
  -5   3  -5 1002.27  110.60
  -5   3  -5  927.70  102.40
   5  -4   5   93.31   11.96
   5  -4   5   72.37    9.32
  -5   4  -5   77.38    9.73
  -5   4  -5   81.69   10.30
   5  -5   5  575.87   63.79
   5  -5   5  524.69   58.43
  -5   5  -5  473.51   52.57
  -5   5  -5  587.74   65.25
   5  -6   5  989.39  109.31
   5  -6   5 1303.26  143.68
  -5   6  -5 1441.89  158.87
  -5   6  -5 1280.55  141.07
   5  -7   5  111.99   13.32
   5  -7   5   93.96   11.73
  -5   7  -5  119.24   14.17
  -5   7  -5  116.63   13.69
   5  -8   5  492.49   54.81
   5  -8   5  591.13   65.38
  -5   8  -5  710.10   78.40
  -5   8  -5  550.79   61.08
   5  -9   5  598.25   66.23
   5  -9   5  610.45   67.72
  -5   9  -5  580.62   64.23
  -5   9  -5  614.51   68.13
   5 -10   5   45.89    6.30
   5 -10   5   54.71    7.90
  -5  10  -5   58.06    7.93
  -5  10  -5   46.33    6.44
   5 -11   5   78.23   10.17
   5 -11   5   76.23    9.05
  -5  11  -5   80.30   10.27
  -5  11  -5   65.25    8.00
   5 -12   5  725.01   79.92
   5 -12   5  684.34   75.65
  -5  12  -5  809.41   89.41
  -5  12  -5  642.31   70.84
   6  10   5  227.57   26.91
   6  10   5  264.72   29.62
  -6 -10  -5  291.80   32.40
  -6 -10  -5  291.90   32.40
  -6  -9  -5  643.33   70.91
  -6  -9  -5  513.51   56.74
   6   8   5   24.40    7.42
   6   8   5   30.03    5.05
  -6  -8  -5   36.17    4.98
  -6  -8  -5   28.71    4.78
   6   7   5   68.77   10.54
   6   7   5  110.97   13.02
  -6  -7  -5   80.13    9.69
  -6  -7  -5  116.23   13.35
   6   6   5  339.63   37.86
   6   6   5  225.71   26.30
  -6  -6  -5  266.75   29.76
  -6  -6  -5  347.08   38.57
   6   5   5 1271.06  140.46
   6   5   5 1355.46  149.37
  -6  -5  -5 1180.56  130.02
  -6  -5  -5 1559.84  171.68
   6   4   5   54.47    7.59
   6   4   5   76.81   11.19
  -6  -4  -5   53.08    6.81
  -6  -4  -5   50.40    6.58
   6   3   5    2.44    4.00
   6   3   5    5.76    5.46
  -6  -3  -5    5.46    3.19
  -6  -3  -5    4.17    3.42
   6   2   5  382.00   42.81
   6   2   5  337.12   37.59
  -6  -2  -5  312.78   34.81
  -6  -2  -5  384.71   42.78
   6   1   5  877.88   96.94
   6   1   5  940.58  103.92
  -6  -1  -5  951.43  104.90
  -6  -1  -5  805.00   88.84
   6   0   5   -3.05    4.47
   6   0   5   -0.41    4.03
  -6   0  -5    5.63    3.49
  -6   0  -5    1.42    3.32
   6  -1   5  712.13   78.87
   6  -1   5  927.70  102.57
  -6   1  -5  881.61   97.21
  -6   1  -5  735.86   81.28
   6  -2   5  348.44   39.08
   6  -2   5  354.20   39.62
  -6   2  -5  266.11   29.83
  -6   2  -5  349.80   38.95
   6  -3   5    0.41    3.46
   6  -3   5   -0.75    4.37
  -6   3  -5    4.98    3.53
  -6   3  -5    4.30    3.90
   6  -4   5   47.01    6.88
   6  -4   5   49.08    7.49
  -6   4  -5   46.71    6.58
  -6   4  -5   44.27    6.61
   6  -5   5  878.56   97.11
   6  -5   5 1239.88  136.80
  -6   5  -5 1264.62  139.41
  -6   5  -5 1136.84  125.31
   6  -6   5  302.17   33.96
   6  -6   5  272.28   30.57
   6  -7   5  114.06   13.63
   6  -7   5  111.11   13.56
  -6   7  -5  120.46   14.30
  -6   7  -5  107.38   12.61
   6  -8   5   39.96    5.76
   6  -8   5   53.62    7.83
  -6   8  -5   37.59    5.80
  -6   8  -5   43.49    6.61
   6  -9   5  670.10   74.09
   6  -9   5  731.45   80.84
  -6   9  -5  702.30   77.55
  -6   9  -5  801.61   88.47
   6 -10   5  319.70   35.76
   6 -10   5  342.68   38.13
  -6  10  -5  321.02   35.79
  -6  10  -5  299.77   33.35
   7   8   5  388.44   43.89
   7   8   5  529.10   58.57
  -7  -8  -5  529.10   58.40
  -7  -8  -5  380.64   42.20
   7   7   5  419.96   47.42
   7   7   5  444.36   49.28
  -7  -7  -5  381.32   42.23
  -7  -7  -5  466.39   51.55
   7   6   5  410.81   45.66
   7   6   5  360.30   40.57
  -7  -6  -5  459.95   50.88
  -7  -6  -5  356.91   39.66
   7   5   5  752.47   83.11
   7   5   5  691.12   76.67
  -7  -5  -5  669.09   73.82
  -7  -5  -5  732.47   80.77
   7   4   5  193.34   21.86
   7   4   5  231.50   26.61
  -7  -4  -5  211.57   23.76
  -7  -4  -5  201.51   22.61
   7   3   5   99.96   11.96
   7   3   5  119.85   14.88
  -7  -3  -5  105.41   12.41
  -7  -3  -5   98.40   11.56
   7   2   5 1403.93  154.87
   7   2   5 1321.90  145.65
  -7  -2  -5 1338.51  147.41
  -7  -2  -5 1442.57  158.80
   7   1   5 1732.37  190.86
   7   1   5 1717.46  189.07
  -7  -1  -5 1907.61  209.88
  -7  -1  -5 1731.01  190.49
   7   0   5   -2.00    3.90
   7   0   5   -1.08    4.61
  -7   0  -5    3.29    3.42
  -7   0  -5    0.54    3.25
   7  -1   5 1708.98  188.22
   7  -1   5 1806.94  199.00
  -7   1  -5 1718.81  189.20
  -7   1  -5 1700.51  187.13
   7  -2   5 1121.24  123.72
   7  -2   5 1332.41  146.90
  -7   2  -5 1223.61  134.83
  -7   2  -5 1292.75  142.36
   7  -3   5  100.63   12.30
   7  -3   5   94.47   11.52
  -7   3  -5  100.77   12.13
  -7   3  -5  100.19   11.86
   7  -4   5  208.15   23.73
   7  -4   5  179.68   20.68
  -7   4  -5  182.76   20.78
  -7   4  -5  211.33   23.83
   7  -5   5  621.97   68.91
   7  -5   5  586.04   64.91
  -7   5  -5  550.45   60.98
  -7   5  -5  590.79   65.35
   7  -6   5  368.78   41.15
   7  -6   5  351.83   39.22
  -7   6  -5  357.93   39.83
  -7   6  -5  351.15   39.05
  -7   7  -5  354.54   39.39
  -7   7  -5  417.92   46.47
   7  -8   5  539.95   59.79
   7  -8   5  527.07   58.43
  -7   8  -5  497.92   55.11
  -7   8  -5  497.58   55.18
   8   5   5  138.33   15.80
   8   5   5  152.59   17.93
  -8  -5  -5  149.17   16.88
  -8  -5  -5  109.28   12.64
   8   4   5   37.62    6.88
   8   4   5   25.96    4.47
  -8  -4  -5   30.67    4.81
  -8  -4  -5   27.69    4.14
   8   3   5  735.52   81.18
   8   3   5  818.90   90.57
  -8  -3  -5  738.23   81.38
  -8  -3  -5  832.46   91.75
   8   2   5  939.91  103.92
   8   2   5  784.67   86.53
  -8  -2  -5  794.50   87.58
  -8  -2  -5  996.51  109.79
   8   1   5   92.30   11.12
   8   1   5   99.62   12.30
  -8  -1  -5  125.58   14.44
  -8  -1  -5   89.99   10.68
   8   0   5    2.27    4.14
   8   0   5    5.08    4.20
  -8   0  -5    1.73    3.22
  -8   0  -5    3.97    3.02
  -8   1  -5   87.18   10.34
  -8   1  -5   87.79   10.44
   8  -2   5  708.74   78.33
   8  -2   5  812.46   89.65
  -8   2  -5  848.73   93.55
  -8   2  -5  764.33   84.30
   8  -3   5  694.51   76.77
   8  -3   5  803.65   88.74
  -8   3  -5  718.23   79.25
  -8   3  -5  746.03   82.30
   8  -4   5   28.54    5.52
   8  -4   5   35.42    5.52
  -8   4  -5   28.91    4.64
  -8   4  -5   32.06    5.12
   8  -5   5  138.43   16.00
   8  -5   5  106.23   12.61
  -8   5  -5  135.34   15.42
  -8   5  -5  138.19   15.80
 -12   6   6   92.53   11.90
  12  -6  -6   87.75   10.98
  12  -6  -6   86.33   10.74
 -12   5   6  144.93   17.86
  12  -5  -6  130.36   15.12
  12  -5  -6  115.48   13.80
 -12   4   6 1396.81  154.09
  12  -4  -6 1208.01  133.14
  12  -4  -6 1079.89  119.07
 -12   3   6 1109.38  122.53
  12  -3  -6 1095.82  120.84
  12  -3  -6  999.22  110.23
 -12   2   6    2.81    6.34
  12  -2  -6    3.69    5.15
  12  -2  -6    5.32    4.44
 -12   1   6  610.45   67.82
  12  -1  -6  673.83   74.47
  12  -1  -6  663.66   73.45
 -12   0   6   64.98    9.83
  12   0  -6   71.11    8.98
  12   0  -6   51.25    7.59
 -12  -1   6  586.72   65.18
 -12  -1   6  723.32   79.99
  12   1  -6  599.94   66.47
  12   1  -6  625.70   69.11
 -12  -2   6    1.66    4.78
 -12  -2   6    9.97    5.73
  12   2  -6    8.88    3.80
  12   2  -6    7.05    4.47
 -12  -3   6 1109.04  122.29
 -12  -3   6  829.07   91.65
  12   3  -6  797.89   87.99
  12   3  -6  975.50  107.65
 -12  -4   6 1195.81  131.82
 -12  -4   6  940.92  103.89
  12   4  -6 1043.29  114.94
  12   4  -6 1028.37  113.45
 -12  -5   6  126.56   14.88
 -12  -5   6  103.92   13.02
  12   5  -6  121.04   14.41
  12   5  -6  119.82   13.96
 -12  -6   6   79.14   10.07
 -12  -6   6   80.60   10.30
  12   6  -6   79.65    9.97
  12   6  -6   79.79   10.03
 -11   9   6  126.80   15.29
  11  -9  -6  119.92   14.20
  11  -9  -6  122.06   14.54
 -11   8   6  360.30   40.37
  11  -8  -6  313.05   34.91
  11  -8  -6  280.04   31.32
 -11   7   6  825.00   91.21
  11  -7  -6  753.82   83.25
  11  -7  -6  683.66   75.52
 -11   6   6  636.21   70.47
  11  -6  -6  637.22   70.50
  11  -6  -6  643.33   71.08
 -11   5   6   26.74    6.17
  11  -5  -6   23.76    4.75
  11  -5  -6   28.98    5.49
 -11   4   6 1419.52  156.49
  11  -4  -6 1467.31  161.58
  11  -4  -6 1453.08  160.09
 -11   3   6   85.48   11.46
  11  -3  -6   99.41   11.83
  11  -3  -6  100.84   12.10
 -11   2   6   71.28    9.83
  11  -2  -6   81.28   10.07
  11  -2  -6   79.75    9.83
 -11   1   6  127.55   15.42
  11  -1  -6  106.02   12.47
  11  -1  -6  113.85   13.42
 -11   0   6  405.72   45.39
 -11   0   6  295.12   33.35
  11   0  -6  289.67   32.40
  11   0  -6  335.46   37.35
 -11  -1   6  171.98   20.03
 -11  -1   6  126.36   15.25
  11   1  -6  116.16   13.69
  11   1  -6  103.04   12.27
 -11  -2   6   76.64   10.24
 -11  -2   6   97.55   12.13
  11   2  -6   85.25   10.24
  11   2  -6  104.06   12.51
 -11  -3   6   90.19   11.46
 -11  -3   6  105.58   12.85
  11   3  -6   95.01   11.73
  11   3  -6   97.35   11.59
 -11  -4   6 1333.09  146.97
 -11  -4   6 1491.38  164.32
  11   4  -6 1321.90  145.68
  11   4  -6 1400.54  154.22
 -11  -5   6   20.54    4.61
 -11  -5   6   28.00    6.34
  11   5  -6   21.15    4.14
  11   5  -6   24.88    5.39
 -11  -6   6  585.37   64.77
 -11  -6   6  591.81   65.62
  11   6  -6  559.61   61.89
  11   6  -6  676.54   74.94
 -11  -7   6  584.01   64.74
 -11  -7   6  612.14   67.69
  11   7  -6  668.07   73.72
  11   7  -6  635.19   70.37
 -11  -8   6  266.14   29.83
 -11  -8   6  312.17   35.05
  11   8  -6  226.11   25.73
  11   8  -6  250.42   28.00
 -11  -9   6  101.04   12.34
 -11  -9   6  100.60   11.96
  11   9  -6   91.65   10.95
  11   9  -6  106.19   13.02
 -10  11   6  570.11   63.32
  10 -11  -6  443.01   49.22
 -10  10   6  263.74   29.79
  10 -10  -6  210.69   23.79
  10 -10  -6  249.64   28.00
 -10   9   6   88.91   11.52
  10  -9  -6   78.03    9.63
  10  -9  -6   78.23    9.56
 -10   8   6  797.55   88.06
  10  -8  -6  823.31   90.84
  10  -8  -6  717.22   79.18
 -10   7   6   24.44    5.46
  10  -7  -6   29.01    4.71
  10  -7  -6   27.25    4.85
 -10   6   6  219.27   24.74
  10  -6  -6  254.08   28.44
  10  -6  -6  241.26   27.12
 -10   5   6   47.79    7.02
  10  -5  -6   78.30    9.59
  10  -5  -6   55.79    7.15
 -10   4   6  955.50  105.45
  10  -4  -6 1044.98  115.11
  10  -4  -6 1110.74  122.46
 -10   3   6 1096.50  121.00
  10  -3  -6 1071.08  118.09
  10  -3  -6 1258.18  138.60
 -10   2   6   -0.71    4.27
 -10   2   6    7.39    4.61
 -10   1   6   55.18    7.63
 -10   1   6   67.62    9.15
  10  -1  -6   84.67   10.30
  10  -1  -6   86.77   10.37
 -10   0   6 2826.16  310.95
 -10   0   6 2370.27  260.86
  10   0  -6 2936.32  322.95
  10   0  -6 2616.35  287.84
 -10  -1   6   78.03   10.24
 -10  -1   6   89.82   11.08
  10   1  -6   75.48    9.12
  10   1  -6   79.69    9.83
 -10  -2   6   -4.24    4.98
 -10  -2   6    1.97    4.51
  10   2  -6    9.32    4.10
  10   2  -6    2.27    3.08
 -10  -3   6 1192.42  131.58
 -10  -3   6  942.96  104.09
  10   3  -6  940.92  103.72
  10   3  -6 1128.02  124.36
 -10  -4   6  992.44  109.48
 -10  -4   6 1173.44  129.48
  10   4  -6 1050.40  115.92
  10   4  -6  877.20   96.70
 -10  -5   6   65.38    8.44
 -10  -5   6   64.03    9.02
  10   5  -6   55.59    8.00
  10   5  -6   56.88    7.32
 -10  -6   6  256.55   28.88
 -10  -6   6  249.74   28.40
  10   6  -6  272.48   30.71
  10   6  -6  248.55   27.86
 -10  -7   6   23.32    4.88
 -10  -7   6   30.71    5.97
  10   7  -6   20.30    4.41
  10   7  -6   17.49    5.22
 -10  -8   6  736.54   81.45
 -10  -8   6  670.44   74.09
 -10  -9   6   74.50    9.15
 -10  -9   6   84.13   10.71
  10   9  -6   68.74    8.54
  10   9  -6   87.65   11.29
 -10 -10   6  232.21   26.23
 -10 -10   6  258.86   28.95
  10  10  -6  214.79   24.03
  10  10  -6  243.77   27.49
 -10 -11   6  440.97   48.88
 -10 -11   6  432.84   48.10
  10  11  -6  548.08   60.88
  10  11  -6  456.23   50.61
  -9  12   6   14.95    5.56
   9 -12  -6   26.51    4.91
   9 -12  -6   22.10    4.37
  -9  11   6 1019.22  112.43
   9 -11  -6  918.89  101.31
   9 -11  -6 1059.22  116.73
  -9  10   6  110.63   13.22
   9 -10  -6   86.13   10.24
   9 -10  -6   91.86   10.78
  -9   9   6  176.36   20.17
   9  -9  -6  160.87   18.13
   9  -9  -6  164.80   18.71
  -9   8   6   10.51    4.71
   9  -8  -6   14.00    3.32
   9  -8  -6    9.76    3.15
  -9   7   6  518.93   57.38
   9  -7  -6  552.49   60.98
   9  -7  -6  558.59   61.65
  -9   6   6  154.53   17.66
   9  -6  -6  218.55   24.47
[truncated: 138,199 more chars]
